# Supplementary material for: N-Linked Glycopeptide Identification Based on Open Mass Spectral Library Search
Source: Biomed Res Int. 2018 Aug 14;2018:1564136. doi: 10.1155/2018/1564136 (PMC6112209; doi:10.1155/2018/1564136)
Supplement: Supplementary 2 — Supplementary Table S2: pMatchGlyco and pGlyco identification results of the data set of six standard glycoproteins. [file 1564136.f2.xlsx]

## Sheet: pGlyco_results
GlySpec	PepSpec	PrecursorMH	Peptide	Mod	PeptideMH	Glycan	GlyMass	GlySite	GlyScore	MassDeviation	PPM	Proteins	Annotation
MS2.4909.4909.4.1.dta	MS2.4903.4903.4.1.dta	3547.45	YKJNSDISSTR	null	1284.62	5-5-1-0-1	2262.81	2	309.193	0.0224525	1.50739	sp|P01871|IGHM_HUMAN	1
MS2.4651.4651.4.0.dta	MS2.4645.4645.4.0.dta	3344.39	YKJNSDISSTR	null	1284.62	5-4-1-0-1	2059.73	2	253.812	0.0346225	4.5369	sp|P01871|IGHM_HUMAN	1
MS2.5127.5127.3.0.dta	MS2.5121.5121.3.0.dta	3635.47	YKJNSDISSTR	null	1284.62	5-4-2-0-1	2350.83	2	232.499	0.0234125	1.52821	sp|P01871|IGHM_HUMAN	1
MS2.29818.29818.4.0.dta	MS2.29813.29813.4.0.dta	4768.99	YFTPJKTEDTIFLR	null	1744.89	7-5-2-0-2	3024.07	4	225.181	0.0246325	1.79727	sp|P02763|A1AG1_HUMAN/sp|P19652|A1AG2_HUMAN	1
MS2.7793.7793.3.0.dta	MS2.7788.7788.3.0.dta	3249.28	EEQYJSTYR	null	1189.51	5-4-1-0-1	2059.73	4	223.783	0.0355625	4.93487	sp|P01857|IGHG1_HUMAN	1
MS2.26667.26667.4.0.dta	MS2.26661.26661.4.0.dta	4124.79	LVPVPITJATLDR	null	1408.82	6-5-2-0-1	2715.96	7	206.612	0.0118525	0.84822	sp|P19652|A1AG2_HUMAN	1
MS2.12934.12934.3.0.dta	MS2.12928.12928.3.0.dta	3018.31	TPLTAJITK	null	958.557	5-4-1-0-1	2059.73	5	197.675	0.0154925	1.36662	sp|P01877|IGHA2_HUMAN	1
MS2.4798.4798.3.0.dta	MS2.4792.4792.3.0.dta	2979.24	YKJNSDISSTR	null	1284.62	4-3-1-0-1	1694.6	2	192.698	0.0146325	1.46954	sp|P01871|IGHM_HUMAN	1
MS2.7988.7988.3.0.dta	MS2.7982.7982.3.0.dta	3087.21	EEQYJSTYR	null	1189.51	4-4-1-0-1	1897.68	4	182.042	0.0155725	2.77491	sp|P01857|IGHG1_HUMAN	1
MS2.14462.14462.3.0.dta	MS2.14456.14456.3.0.dta	2764.12	EEQFJSTFR	null	1157.52	4-4-0-0-1	1606.59	4	177.753	0.0120225	1.65183	sp|P01859|IGHG2_HUMAN	1
MS2.29817.29817.4.0.dta	MS2.29811.29811.4.0.dta	4751.96	YFTPJKTEDTIFLR	null	1744.89	6-5-3-0-1	3007.06	4	177.129	0.0149925	1.50688	sp|P02763|A1AG1_HUMAN/sp|P19652|A1AG2_HUMAN	1
MS2.4652.4652.3.0.dta	MS2.4646.4646.3.0.dta	3141.29	YKJNSDISSTR	null	1284.62	5-3-1-0-1	1856.66	2	176.538	0.0161525	1.97589	sp|P01871|IGHM_HUMAN	1
MS2.4873.4873.3.0.dta	MS2.4867.4867.3.0.dta	3344.37	YKJNSDISSTR	null	1284.62	5-4-1-0-1	2059.73	2	172.814	0.0158125	1.91995	sp|P01871|IGHM_HUMAN	1
MS2.26756.26756.4.1.dta	MS2.26749.26749.4.1.dta	4141.82	LVPVPITJATLDR	null	1408.82	7-5-1-0-2	2732.98	7	172.752	0.0260625	2.62867	sp|P19652|A1AG2_HUMAN	1
MS2.14244.14244.3.0.dta	MS2.14238.14238.3.0.dta	2764.12	EEQFJSTFR	null	1157.52	4-4-0-0-1	1606.59	4	172.682	0.0124325	1.5106	sp|P01859|IGHG2_HUMAN	1
MS2.31091.31091.4.0.dta	MS2.31085.31085.4.0.dta	3999.81	VVLHPJYSQVDIGLIK	null	1795.01	5-4-2-0-0	2204.77	5	171.932	0.0239625	-1.17368	sp|P00738|HPT_HUMAN	1
MS2.4675.4675.3.2.dta	MS2.4669.4669.3.2.dta	3303.35	YKJNSDISSTR	null	1284.62	6-3-1-0-1	2018.71	2	169.909	0.0231625	3.07112	sp|P01871|IGHM_HUMAN	1
MS2.11946.11946.3.0.dta	MS2.11936.11936.3.0.dta	2930.29	TPLTAJITK	null	958.557	5-5-0-0-1	1971.72	5	165.439	0.0140625	2.20624	sp|P01877|IGHA2_HUMAN	1
MS2.8466.8466.3.0.dta	MS2.8460.8460.3.0.dta	3473.47	LAGKPTHVJVS	null	1122.63	5-4-2-0-1	2350.83	8	165.429	0.0161225	1.36855	sp|P01876|IGHA1_HUMAN	1
MS2.28282.28282.4.0.dta	MS2.28275.28275.4.0.dta	4477.89	YFTPJKTEDTIFLR	null	1744.89	7-5-1-0-2	2732.98	4	164.173	0.0200325	2.32057	sp|P02763|A1AG1_HUMAN/sp|P19652|A1AG2_HUMAN	1
MS2.6992.6992.3.0.dta	MS2.6986.6986.3.0.dta	2958.17	EEQYJSTYR	null	1189.51	5-4-0-0-1	1768.64	4	162.758	0.0199025	3.67338	sp|P01857|IGHG1_HUMAN	1
MS2.28317.28317.4.0.dta	MS2.28311.28311.4.0.dta	4460.86	YFTPJKTEDTIFLR	null	1744.89	6-5-2-0-1	2715.96	4	156.095	0.00940253	1.48195	sp|P02763|A1AG1_HUMAN/sp|P19652|A1AG2_HUMAN	1
MS2.5312.5312.4.1.dta	MS2.5306.5306.4.1.dta	3838.54	YKJNSDISSTR	null	1284.62	5-5-2-0-1	2553.91	2	153.837	0.0163725	0.09124	sp|P01871|IGHM_HUMAN	1
MS2.4576.4576.3.0.dta	MS2.4570.4570.3.0.dta	2891.21	YKJNSDISSTR	null	1284.62	4-4-0-0-1	1606.59	2	150.159	0.0101325	0.96306	sp|P01871|IGHM_HUMAN	1
MS2.4540.4540.3.0.dta	MS2.4535.4535.3.0.dta	3256.36	YKJNSDISSTR	null	1284.62	5-5-0-0-1	1971.72	2	149.583	0.0198825	0.71707	sp|P01871|IGHM_HUMAN	1
MS2.31543.31543.4.0.dta	MS2.31537.31537.4.0.dta	4534.94	LAGKPTHVJVSVVMAEVDGTC	21,C(Carbamidomethyl[C]);	2184.08	5-4-2-0-1	2350.83	8	149.334	0.0311825	1.64312	sp|P01876|IGHA1_HUMAN	3
MS2.15476.15476.3.0.dta	MS2.15470.15470.3.0.dta	3217.26	EEQFJSTFR	null	1157.52	5-4-1-0-1	2059.73	4	148.657	0.00437253	-1.19382	sp|P01859|IGHG2_HUMAN	3
MS2.3651.3651.3.0.dta	MS2.3645.3645.3.0.dta	2710.04	NEEYJK	null	796.347	5-4-1-0-0	1913.68	4	145.455	0.0151225	1.38611	sp|P02763|A1AG1_HUMAN/sp|P19652|A1AG2_HUMAN	1
MS2.27993.27993.4.1.dta	MS2.27987.27987.4.1.dta	4843.02	YFTPJKTEDTIFLR	null	1744.89	8-6-1-0-2	3098.11	4	142.372	0.0243525	3.34605	sp|P02763|A1AG1_HUMAN/sp|P19652|A1AG2_HUMAN	1
MS2.5129.5129.3.0.dta	MS2.5122.5122.3.0.dta	3344.36	YKJNSDISSTR	null	1284.62	5-4-1-0-1	2059.73	2	142.367	0.00867253	2.12547	sp|P01871|IGHM_HUMAN	1
MS2.30187.30187.4.0.dta	MS2.30182.30182.4.0.dta	4622.93	YFTPJKTEDTIFLR	null	1744.89	7-5-2-0-1	2878.02	4	141.258	0.0218525	2.17795	sp|P02763|A1AG1_HUMAN/sp|P19652|A1AG2_HUMAN	1
MS2.30894.30894.4.2.dta	MS2.30887.30887.4.2.dta	4381.88	VVLHPJYSQVDIGLIK	null	1795.01	7-5-1-0-1	2586.92	5	141.239	-0.0542975	-9.46455	sp|P00738|HPT_HUMAN	1
MS2.7066.7066.3.0.dta	MS2.7060.7060.3.0.dta	2796.11	EEQYJSTYR	null	1189.51	4-4-0-0-1	1606.59	4	140.332	0.00956253	0.84969	sp|P01857|IGHG1_HUMAN	1
MS2.31693.31693.4.0.dta	MS2.31687.31687.4.0.dta	4551.96	FYFTPJKTEDTIFLR	null	1891.96	6-4-1-0-4	2659.96	5	138.463	0.0374025	2.45989	sp|P02763|A1AG1_HUMAN/sp|P19652|A1AG2_HUMAN	1
MS2.31392.31392.4.0.dta	MS2.31386.31386.4.0.dta	3999.8	VVLHPJYSQVDIGLIK	null	1795.01	5-4-2-0-0	2204.77	5	138.312	0.0147625	-0.51232	sp|P00738|HPT_HUMAN	1
MS2.3762.3762.3.0.dta	MS2.3756.3756.3.0.dta	3001.14	NEEYJK	null	796.347	5-4-2-0-0	2204.77	4	138.054	0.0165825	1.70811	sp|P02763|A1AG1_HUMAN/sp|P19652|A1AG2_HUMAN	1
MS2.27957.27957.3.0.dta	MS2.27952.27952.3.0.dta	4286.86	LVPVPITJATLDR	null	1408.82	7-5-2-0-1	2878.02	7	137.459	0.0279825	3.00244	sp|P19652|A1AG2_HUMAN	1
MS2.14683.14683.3.0.dta	MS2.14678.14678.3.0.dta	2764.12	EEQFJSTFR	null	1157.52	4-4-0-0-1	1606.59	4	137.424	0.00998253	1.45117	sp|P01859|IGHG2_HUMAN	1
MS2.4354.4354.3.2.dta	MS2.4348.4348.3.2.dta	3053.21	MVSHHJLTTGAT	1,M(Oxidation[M]);	1284.6	5-4-0-0-1	1768.64	5	136.552	-0.0292175	-11.6275	sp|P00738|HPT_HUMAN/sp|P00739|HPTR_HUMAN	3
MS2.4133.4133.3.0.dta	MS2.4128.4128.3.0.dta	2819.13	JNSDISSTR	null	993.46	5-5-0-0-0	1825.66	0	136.269	0.00973253	1.20334	sp|P01871|IGHM_HUMAN	1
MS2.7103.7103.3.0.dta	MS2.7097.7097.3.0.dta	2634.06	EEQYJSTYR	null	1189.51	3-4-0-0-1	1444.53	4	132.682	0.0150225	1.54453	sp|P01857|IGHG1_HUMAN	1
MS2.26974.26974.4.1.dta	MS2.26969.26969.4.1.dta	3978.73	LVPVPITJATLDR	null	1408.82	6-5-2-0-0	2569.9	7	132.021	0.0123325	1.09415	sp|P19652|A1AG2_HUMAN	1
MS2.28030.28030.3.0.dta	MS2.28024.28024.3.0.dta	4269.83	LVPVPITJATLDR	null	1408.82	6-5-3-0-0	2861	7	131.607	0.0131625	1.58709	sp|P19652|A1AG2_HUMAN	1
MS2.5277.5277.3.0.dta	MS2.5270.5270.3.0.dta	3838.54	YKJNSDISSTR	null	1284.62	5-5-2-0-1	2553.91	2	131.556	0.0122625	0.17375	sp|P01871|IGHM_HUMAN	1
MS2.33389.33389.4.1.dta	MS2.33382.33382.4.1.dta	4349.97	LVPVPITJATLDQITGK	null	1780.02	6-5-2-0-0	2569.9	7	130.991	0.0423125	3.46836	sp|P02763|A1AG1_HUMAN	1
MS2.31116.31116.3.1.dta	MS2.31110.31110.3.1.dta	4016.82	VVLHPJYSQVDIGLIK	null	1795.01	6-4-1-0-1	2221.79	5	130.705	0.0199025	0.6188	sp|P00738|HPT_HUMAN	1
MS2.7253.7253.3.0.dta	MS2.7246.7246.3.0.dta	3161.24	EEQYJSTYR	null	1189.51	5-5-0-0-1	1971.72	4	130.155	0.0122625	2.17017	sp|P01857|IGHG1_HUMAN	1
MS2.32163.32163.4.1.dta	MS2.32157.32157.4.1.dta	4593.11	MVSHHJLTTGATLINEQWLLTTAK	null	2679.39	5-4-1-0-0	1913.68	5	128.947	0.0409225	1.29923	sp|P00738|HPT_HUMAN/sp|P00739|HPTR_HUMAN	1
MS2.7275.7275.3.1.dta	MS2.7270.7270.3.1.dta	2999.19	EEQYJSTYR	null	1189.51	4-5-0-0-1	1809.67	4	128.736	0.0150125	2.71379	sp|P01857|IGHG1_HUMAN	1
MS2.5102.5102.3.0.dta	MS2.5098.5098.3.0.dta	2979.23	YKJNSDISSTR	null	1284.62	4-3-1-0-1	1694.6	2	128.341	0.00782253	0.43203	sp|P01871|IGHM_HUMAN	1
MS2.3429.3429.3.0.dta	MS2.3423.3423.3.0.dta	2710.04	NEEYJK	null	796.347	5-4-1-0-0	1913.68	4	128.092	0.0155825	1.99423	sp|P02763|A1AG1_HUMAN/sp|P19652|A1AG2_HUMAN	1
MS2.4144.4144.3.1.dta	MS2.4138.4138.3.1.dta	2705.07	JNSDISSTR	null	993.46	5-3-0-0-2	1711.62	0	127.721	-0.00965747	-3.40357	sp|P01871|IGHM_HUMAN	1
MS2.33999.33999.4.0.dta	MS2.33992.33992.4.0.dta	4641.06	LVPVPITJATLDQITGK	null	1780.02	6-5-3-0-0	2861	7	127.588	0.0418425	3.47982	sp|P02763|A1AG1_HUMAN	1
MS2.4502.4502.3.0.dta	MS2.4496.4496.3.0.dta	2688.14	YKJNSDISSTR	null	1284.62	4-3-0-0-1	1403.51	2	127.269	0.0106825	1.16494	sp|P01871|IGHM_HUMAN	1
MS2.31129.31129.4.1.dta	MS2.31123.31123.4.1.dta	4381.96	VVLHPJYSQVDIGLIK	null	1795.01	7-5-1-0-1	2586.92	5	126.842	0.0313525	2.9546	sp|P00738|HPT_HUMAN	1
MS2.31399.31399.4.0.dta	MS2.31394.31394.4.0.dta	4016.82	VVLHPJYSQVDIGLIK	null	1795.01	6-4-1-0-1	2221.79	5	126.443	0.0235525	1.81738	sp|P00738|HPT_HUMAN	1
MS2.30942.30942.4.0.dta	MS2.30936.30936.4.0.dta	4510.99	VVLHPJYSQVDIGLIK	null	1795.01	6-5-2-0-1	2715.96	5	126.109	0.0194725	4.08913	sp|P00738|HPT_HUMAN	1
MS2.13797.13797.3.0.dta	MS2.13791.13791.3.0.dta	2926.17	EEQFJSTFR	null	1157.52	5-4-0-0-1	1768.64	4	124.964	0.0110725	2.36272	sp|P01859|IGHG2_HUMAN	1
MS2.27507.27507.4.1.dta	MS2.27501.27501.4.1.dta	4534.93	LAGKPTHVJVSVVMAEVDGTC	21,C(Carbamidomethyl[C]);	2184.08	5-4-2-0-1	2350.83	8	124.724	0.0184025	1.67174	sp|P01876|IGHA1_HUMAN	3
MS2.14499.14499.3.0.dta	MS2.14493.14493.3.0.dta	2967.2	EEQFJSTFR	null	1157.52	4-5-0-0-1	1809.67	4	124.461	0.00908253	0.24442	sp|P01859|IGHG2_HUMAN	1
MS2.28282.28282.4.2.dta	MS2.28275.28275.4.2.dta	4476.86	YFTPJKTEDTIFLR	null	1744.89	7-5-2-0-0	2731.96	4	124.312	0.0162925	1.8143	sp|P02763|A1AG1_HUMAN/sp|P19652|A1AG2_HUMAN	1
MS2.32592.32592.4.1.dta	MS2.32586.32586.4.1.dta	4221.94	LVPVPITJATLDQITGK	null	1780.02	7-5-0-0-2	2441.88	7	124.211	0.0321625	2.15271	sp|P02763|A1AG1_HUMAN	1
MS2.31166.31166.4.0.dta	MS2.31160.31160.4.0.dta	4364.94	VVLHPJYSQVDIGLIK	null	1795.01	6-5-2-0-0	2569.9	5	123.691	0.0219325	2.25534	sp|P00738|HPT_HUMAN	1
MS2.32654.32654.4.1.dta	MS2.32648.32648.4.1.dta	4827.04	FYFTPJKTEDTIFLR	null	1891.96	7-6-2-0-0	2935.04	5	122.306	0.0411825	3.67627	sp|P02763|A1AG1_HUMAN/sp|P19652|A1AG2_HUMAN	1
MS2.8504.8504.4.0.dta	MS2.8499.8499.4.0.dta	3676.55	LAGKPTHVJVS	null	1122.63	5-5-2-0-1	2553.91	8	121.97	0.0128925	0.42732	sp|P01876|IGHA1_HUMAN	3
MS2.8430.8430.4.1.dta	MS2.8425.8425.4.1.dta	3473.47	LAGKPTHVJVS	null	1122.63	5-4-2-0-1	2350.83	8	121.51	0.0104425	0.81234	sp|P01876|IGHA1_HUMAN	1
MS2.14034.14034.3.0.dta	MS2.14028.14028.3.0.dta	2926.17	EEQFJSTFR	null	1157.52	5-4-0-0-1	1768.64	4	119.41	0.00982253	1.48083	sp|P01859|IGHG2_HUMAN	1
MS2.26831.26831.4.0.dta	MS2.26826.26826.4.0.dta	4472.87	GLTFQQJASSMCVPDQDTAIR	12,C(Carbamidomethyl[C]);	2339.08	6-5-0-0-1	2133.77	6	118.869	0.0209825	4.5898	sp|P01871|IGHM_HUMAN	2
MS2.4097.4097.3.1.dta	MS2.4090.4090.3.1.dta	3053.21	JNSDISSTR	null	993.46	5-4-1-0-1	2059.73	0	118.68	0.0157025	2.14011	sp|P01871|IGHM_HUMAN	1
MS2.29625.29625.4.0.dta	MS2.29618.29618.4.0.dta	3708.7	VVLHPJYSQVDIGLIK	null	1795.01	5-4-1-0-0	1913.68	5	118.325	0.0107125	-0.72989	sp|P00738|HPT_HUMAN	1
MS2.8320.8320.3.0.dta	MS2.8314.8314.3.0.dta	3103.2	EEQYJSTYR	null	1189.51	5-4-1-0-0	1913.68	4	117.22	0.0148925	2.75955	sp|P01857|IGHG1_HUMAN	1
MS2.4033.4033.3.0.dta	MS2.4027.4027.3.0.dta	3346.31	EJGTISR	null	776.39	6-5-2-0-0	2569.9	1	116.97	0.0121325	0.98511	sp|P02763|A1AG1_HUMAN	3
MS2.3540.3540.3.0.dta	MS2.3534.3534.3.0.dta	3001.13	NEEYJK	null	796.347	5-4-2-0-0	2204.77	4	116.402	0.0114025	1.39661	sp|P02763|A1AG1_HUMAN/sp|P19652|A1AG2_HUMAN	1
MS2.30755.30755.4.0.dta	MS2.30750.30750.4.0.dta	4145.86	VVLHPJYSQVDIGLIK	null	1795.01	5-4-2-0-1	2350.83	5	116.129	0.0149725	1.3913	sp|P00738|HPT_HUMAN	1
MS2.6845.6845.3.0.dta	MS2.6840.6840.3.0.dta	2796.11	EEQYJSTYR	null	1189.51	4-4-0-0-1	1606.59	4	115.943	0.0107925	1.42088	sp|P01857|IGHG1_HUMAN	1
MS2.31581.31581.3.0.dta	MS2.31575.31575.3.0.dta	4534.93	LAGKPTHVJVSVVMAEVDGTC	21,C(Carbamidomethyl[C]);	2184.08	5-4-2-0-1	2350.83	8	115.598	0.0243725	-3.18731	sp|P01876|IGHA1_HUMAN	2
MS2.31118.31118.4.3.dta	MS2.31114.31114.4.3.dta	4145.86	VVLHPJYSQVDIGLIK	null	1795.01	5-4-2-0-1	2350.83	5	113.559	0.0193825	0.6006	sp|P00738|HPT_HUMAN	3
MS2.32618.32618.4.0.dta	MS2.32611.32611.4.0.dta	4204.92	LVPVPITJATLDQITGK	null	1780.02	6-5-1-0-1	2424.87	7	113.495	0.0280925	2.34028	sp|P02763|A1AG1_HUMAN	3
MS2.31130.31130.3.0.dta	MS2.31125.31125.3.0.dta	4145.88	VVLHPJYSQVDIGLIK	null	1795.01	5-4-2-0-1	2350.83	5	113.275	0.0338225	3.58356	sp|P00738|HPT_HUMAN	1
MS2.28097.28097.4.1.dta	MS2.28092.28092.4.1.dta	4415.89	LVPVPITJATLDR	null	1408.82	6-5-3-0-1	3007.06	7	113.232	0.0144725	1.55856	sp|P19652|A1AG2_HUMAN	3
MS2.26593.26593.4.1.dta	MS2.26587.26587.4.1.dta	4398.83	GLTFQQJASSMCVPDQDTAIR	12,C(Carbamidomethyl[C]);	2339.08	5-4-1-0-1	2059.73	6	112.844	0.0163625	1.70428	sp|P01871|IGHM_HUMAN	2
MS2.29548.29548.4.3.dta	MS2.29542.29542.4.3.dta	3871.76	VVLHPJYSQVDIGLIK	null	1795.01	6-4-0-0-2	2076.75	5	112.603	-0.00612747	-2.76624	sp|P00738|HPT_HUMAN	1
MS2.27012.27012.3.0.dta	MS2.27006.27006.3.0.dta	3978.73	LVPVPITJATLDR	null	1408.82	6-5-2-0-0	2569.9	7	111.986	0.0141125	1.39073	sp|P19652|A1AG2_HUMAN	1
MS2.29623.29623.4.1.dta	MS2.29617.29617.4.1.dta	4256.78	MVSHHJLTTGATLINEQW	null	2052	5-4-2-0-0	2204.77	5	111.182	0.0151525	-1.11321	sp|P00738|HPT_HUMAN/sp|P00739|HPTR_HUMAN	3
MS2.27015.27015.4.0.dta	MS2.27011.27011.4.0.dta	3995.76	LVPVPITJATLDR	null	1408.82	7-5-1-0-1	2586.92	7	110.781	0.0193625	1.74027	sp|P19652|A1AG2_HUMAN	1
MS2.33997.33997.3.1.dta	MS2.33991.33991.3.1.dta	4804.13	LVPVPITJATLDQITGK	null	1780.02	7-5-2-0-2	3024.07	7	110.358	0.0395925	2.18104	sp|P02763|A1AG1_HUMAN	3
MS2.26867.26867.4.1.dta	MS2.26861.26861.4.1.dta	4601.91	GLTFQQJASSMCVPDQDTAIR	12,C(Carbamidomethyl[C]);	2339.08	5-5-1-0-1	2262.81	6	110.036	0.0193925	3.31392	sp|P01871|IGHM_HUMAN	2
MS2.4060.4060.3.0.dta	MS2.4053.4053.3.0.dta	2981.17	EJGTISR	null	776.39	5-4-2-0-0	2204.77	1	109.583	0.00969253	0.84246	sp|P02763|A1AG1_HUMAN	3
MS2.4368.4368.3.0.dta	MS2.4362.4362.3.0.dta	2663.1	YKJNSDISSTR	null	1284.62	6-2-0-0-0	1378.48	2	109.443	0.00804253	0.9144	sp|P01871|IGHM_HUMAN	1
MS2.25365.25365.4.1.dta	MS2.25359.25359.4.1.dta	3687.64	LVPVPITJATLDR	null	1408.82	6-5-1-0-0	2278.81	7	109.329	0.0105925	1.0747	sp|P19652|A1AG2_HUMAN	1
MS2.29245.29245.4.1.dta	MS2.29239.29239.4.1.dta	4621.92	MVSHHJLTTGATLINEQW	null	2052	6-5-2-0-0	2569.9	5	109.242	0.0159125	0.33827	sp|P00738|HPT_HUMAN/sp|P00739|HPTR_HUMAN	1
MS2.26641.26641.4.1.dta	MS2.26636.26636.4.1.dta	3978.73	LVPVPITJATLDR	null	1408.82	6-5-2-0-0	2569.9	7	109	0.00866253	0.51395	sp|P19652|A1AG2_HUMAN	1
MS2.33424.33424.3.0.dta	MS2.33418.33418.3.0.dta	4349.96	LVPVPITJATLDQITGK	null	1780.02	6-5-2-0-0	2569.9	7	108.666	0.0375825	0.79888	sp|P02763|A1AG1_HUMAN	1
MS2.14036.14036.3.0.dta	MS2.14029.14029.3.0.dta	2764.12	EEQFJSTFR	null	1157.52	4-4-0-0-1	1606.59	4	108.587	0.00869253	1.74521	sp|P01859|IGHG2_HUMAN	3
MS2.29621.29621.3.0.dta	MS2.29616.29616.3.0.dta	3708.71	VVLHPJYSQVDIGLIK	null	1795.01	5-4-1-0-0	1913.68	5	108.384	0.0181725	1.08389	sp|P00738|HPT_HUMAN	1
MS2.3985.3985.3.0.dta	MS2.3980.3980.3.0.dta	3529.34	NEEYJK	null	796.347	7-5-1-0-2	2732.98	4	107.268	0.0192425	1.34992	sp|P02763|A1AG1_HUMAN/sp|P19652|A1AG2_HUMAN	1
MS2.4578.4578.3.0.dta	MS2.4571.4571.3.0.dta	3053.27	YKJNSDISSTR	null	1284.62	5-4-0-0-1	1768.64	2	106.789	0.00979253	-0.17897	sp|P01871|IGHM_HUMAN	1
MS2.26938.26938.4.1.dta	MS2.26932.26932.4.1.dta	4618.93	GLTFQQJASSMCVPDQDTAIR	12,C(Carbamidomethyl[C]);	2339.08	6-5-0-0-2	2279.83	6	106.741	0.0247825	5.46218	sp|P01871|IGHM_HUMAN	2
MS2.35047.35047.4.1.dta	MS2.35042.35042.4.1.dta	4483.01	MVSHHJLTTGATLINEQWLL	null	2278.16	5-4-2-0-0	2204.77	5	106.206	0.0723825	9.60524	sp|P00738|HPT_HUMAN/sp|P00739|HPTR_HUMAN	3
MS2.5201.5201.3.0.dta	MS2.5195.5195.3.0.dta	3489.4	YKJNSDISSTR	null	1284.62	5-4-2-0-0	2204.77	2	105.605	0.0132825	2.85821	sp|P01871|IGHM_HUMAN	1
MS2.3355.3355.3.0.dta	MS2.3351.3351.3.0.dta	3157.23	RNEEYJK	null	952.448	5-4-2-0-0	2204.77	5	105.395	0.0111825	0.98532	sp|P02763|A1AG1_HUMAN/sp|P19652|A1AG2_HUMAN	3
MS2.26558.26558.4.0.dta	MS2.26551.26551.4.0.dta	4023.71	YFTPJKTEDTIFLR	null	1744.89	6-5-1-0-0	2278.81	4	104.902	0.00615253	-0.77079	sp|P02763|A1AG1_HUMAN/sp|P19652|A1AG2_HUMAN	1
MS2.3319.3319.3.0.dta	MS2.3314.3314.3.0.dta	3001.13	NEEYJK	null	796.347	5-4-2-0-0	2204.77	4	104.698	0.0119225	1.65491	sp|P02763|A1AG1_HUMAN/sp|P19652|A1AG2_HUMAN	1
MS2.3764.3764.3.0.dta	MS2.3757.3757.3.0.dta	3512.33	NEEYJK	null	796.347	6-5-2-0-1	2715.96	4	104.679	0.0163725	1.58919	sp|P02763|A1AG1_HUMAN/sp|P19652|A1AG2_HUMAN	1
MS2.14283.14283.3.0.dta	MS2.14276.14276.3.0.dta	2967.2	EEQFJSTFR	null	1157.52	4-5-0-0-1	1809.67	4	104.626	0.00958253	1.14654	sp|P01859|IGHG2_HUMAN	1
MS2.25216.25216.3.0.dta	MS2.25210.25210.3.0.dta	3833.7	LVPVPITJATLDR	null	1408.82	6-5-1-0-1	2424.87	7	102.948	0.0158325	3.44679	sp|P19652|A1AG2_HUMAN	1
MS2.5164.5164.3.0.dta	MS2.5158.5158.3.0.dta	3547.45	YKJNSDISSTR	null	1284.62	5-5-1-0-1	2262.81	2	102.842	0.0161425	2.62957	sp|P01871|IGHM_HUMAN	3
MS2.29474.29474.4.0.dta	MS2.29469.29469.4.0.dta	4090.86	VVLHPJYSQVDIGLIK	null	1795.01	7-5-0-0-1	2295.82	5	102.489	0.0212425	2.54273	sp|P00738|HPT_HUMAN	1
MS2.7325.7325.3.0.dta	MS2.7319.7319.3.0.dta	2634.06	EEQYJSTYR	null	1189.51	3-4-0-0-1	1444.53	4	102.246	0.0159825	3.46308	sp|P01857|IGHG1_HUMAN	1
MS2.29358.29358.4.1.dta	MS2.29353.29353.4.1.dta	4073.83	VVLHPJYSQVDIGLIK	null	1795.01	6-5-1-0-0	2278.81	5	100.926	0.00759253	1.10242	sp|P00738|HPT_HUMAN	1
MS2.4144.4144.3.0.dta	MS2.4138.4138.3.0.dta	2704.06	JNSDISSTR	null	993.46	5-3-1-0-0	1710.6	0	100.326	0.00696253	0.82455	sp|P01871|IGHM_HUMAN	1
MS2.23161.23161.3.0.dta	MS2.23154.23154.3.0.dta	3551.41	GLTFQQJASSM	null	1183.54	6-4-1-0-2	2367.85	6	99.8494	0.0251225	0.91546	sp|P01871|IGHM_HUMAN/sp|P04220|MUCB_HUMAN	2
MS2.26531.26531.5.0.dta	MS2.26525.26525.5.0.dta	4601.9	GLTFQQJASSMCVPDQDTAIR	12,C(Carbamidomethyl[C]);	2339.08	5-5-1-0-1	2262.81	6	99.4728	0.0110925	2.73308	sp|P01871|IGHM_HUMAN	2
MS2.29854.29854.3.0.dta	MS2.29848.29848.3.0.dta	3708.71	VVLHPJYSQVDIGLIK	null	1795.01	5-4-1-0-0	1913.68	5	99.2503	0.0178825	2.02622	sp|P00738|HPT_HUMAN	1
MS2.28572.28572.3.0.dta	MS2.28567.28567.3.0.dta	4314.81	YFTPJKTEDTIFLR	null	1744.89	6-5-2-0-0	2569.9	4	98.6409	0.0108525	-0.12477	sp|P02763|A1AG1_HUMAN/sp|P19652|A1AG2_HUMAN	1
MS2.3059.3059.3.0.dta	MS2.3053.3053.3.0.dta	2866.14	RNEEYJK	null	952.448	5-4-1-0-0	1913.68	5	98.5829	0.0100925	1.54025	sp|P02763|A1AG1_HUMAN/sp|P19652|A1AG2_HUMAN	3
MS2.3948.3948.3.0.dta	MS2.3943.3943.3.0.dta	2616.05	JNSDISSTR	null	993.46	5-4-0-0-0	1622.58	0	98.0526	0.00696253	-0.06349	sp|P01871|IGHM_HUMAN	1
MS2.25067.25067.4.1.dta	MS2.25060.25060.4.1.dta	3833.69	LVPVPITJATLDR	null	1408.82	6-5-1-0-1	2424.87	7	97.6454	0.0105225	0.12187	sp|P19652|A1AG2_HUMAN	1
MS2.32654.32654.4.3.dta	MS2.32648.32648.4.3.dta	4829.04	FYFTPJKTEDTIFLR	null	1891.96	7-6-0-0-4	2937.08	5	97.3201	0.00223253	-2.14171	sp|P02763|A1AG1_HUMAN/sp|P19652|A1AG2_HUMAN	1
MS2.29548.29548.4.0.dta	MS2.29542.29542.4.0.dta	3870.75	VVLHPJYSQVDIGLIK	null	1795.01	6-4-1-0-0	2075.73	5	97.6058	0.00607253	-0.93619	sp|P00738|HPT_HUMAN	1
MS2.26830.26830.4.1.dta	MS2.26824.26824.4.1.dta	4398.82	GLTFQQJASSMCVPDQDTAIR	12,C(Carbamidomethyl[C]);	2339.08	5-4-1-0-1	2059.73	6	97.171	0.0137525	1.36997	sp|P01871|IGHM_HUMAN	2
MS2.25626.25626.3.0.dta	MS2.25618.25618.3.0.dta	3467.52	SIJTTNVMGTSLTVR	null	1593.83	6-3-0-0-2	1873.67	2	96.9205	0.0185825	0.17073	sp|P01023|A2MG_HUMAN	1
MS2.28135.28135.4.4.dta	MS2.28129.28129.4.4.dta	4303.88	LVPVPITJATLDR	null	1408.82	8-5-1-0-2	2895.03	7	96.8388	0.0326125	3.93858	sp|P19652|A1AG2_HUMAN	1
MS2.30755.30755.4.3.dta	MS2.30750.30750.4.3.dta	4147.86	VVLHPJYSQVDIGLIK	null	1795.01	5-4-0-0-5	2352.87	5	95.9712	-0.0195175	-3.49662	sp|P00738|HPT_HUMAN	1
MS2.4430.4430.3.0.dta	MS2.4423.4423.3.0.dta	2907.21	YKJNSDISSTR	null	1284.62	5-4-0-0-0	1622.58	2	96.3912	0.00953253	0.1894	sp|P01871|IGHM_HUMAN	1
MS2.28394.28394.3.0.dta	MS2.28388.28388.3.0.dta	4460.87	YFTPJKTEDTIFLR	null	1744.89	6-5-2-0-1	2715.96	4	95.3542	0.0159325	1.86678	sp|P02763|A1AG1_HUMAN/sp|P19652|A1AG2_HUMAN	1
MS2.4230.4230.3.0.dta	MS2.4224.4224.3.0.dta	2688.07	JNSDISSTR	null	993.46	4-3-1-0-1	1694.6	0	95.2743	0.00927253	1.3572	sp|P01871|IGHM_HUMAN	3
MS2.4271.4271.3.1.dta	MS2.4266.4266.3.1.dta	2850.12	JNSDISSTR	null	993.46	5-3-1-0-1	1856.66	0	95.1612	0.00854253	0.63155	sp|P01871|IGHM_HUMAN	3
MS2.12947.12947.3.0.dta	MS2.12941.12941.3.0.dta	3221.38	TPLTAJITK	null	958.557	5-5-1-0-1	2262.81	5	94.5014	0.0100825	-0.22177	sp|P01877|IGHA2_HUMAN	1
MS2.26458.26458.4.1.dta	MS2.26452.26452.4.1.dta	4186.75	YFTPJKTEDTIFLR	null	1744.89	7-5-0-0-2	2441.88	4	93.9338	-0.0228475	-5.44381	sp|P02763|A1AG1_HUMAN/sp|P19652|A1AG2_HUMAN	1
MS2.4034.4034.3.0.dta	MS2.4028.4028.3.0.dta	2866.12	JNSDISSTR	null	993.46	6-3-1-0-0	1872.65	0	93.4771	0.00836253	0.93646	sp|P01871|IGHM_HUMAN	1
MS2.30445.30445.3.0.dta	MS2.30439.30439.3.0.dta	4340.89	CANLVPVPITJATLDR	1,C(Carbamidomethyl[C]);	1753.93	7-5-1-0-1	2586.92	10	92.8833	0.0405725	3.26638	sp|P19652|A1AG2_HUMAN	1
MS2.5699.5699.3.0.dta	MS2.5693.5693.3.0.dta	3344.36	YKJNSDISSTR	null	1284.62	5-4-1-0-1	2059.73	2	92.8435	0.00967253	1.79737	sp|P01871|IGHM_HUMAN	3
MS2.32091.32091.4.1.dta	MS2.32086.32086.4.1.dta	4958.24	MVSHHJLTTGATLINEQWLLTTAK	null	2679.39	6-5-1-0-0	2278.81	5	92.8118	0.0351325	3.82388	sp|P00738|HPT_HUMAN/sp|P00739|HPTR_HUMAN	1
MS2.3207.3207.3.0.dta	MS2.3201.3201.3.0.dta	2710.03	NEEYJK	null	796.347	5-4-1-0-0	1913.68	4	92.3255	0.0101225	1.19862	sp|P02763|A1AG1_HUMAN/sp|P19652|A1AG2_HUMAN	1
MS2.7399.7399.3.0.dta	MS2.7393.7393.3.0.dta	2812.1	EEQYJSTYR	null	1189.51	5-4-0-0-0	1622.58	4	91.8047	0.0102825	0.42062	sp|P01857|IGHG1_HUMAN	1
MS2.32067.32067.3.0.dta	MS2.32061.32061.3.0.dta	4656.05	VVLHPJYSQVDIGLIK	null	1795.01	6-5-3-0-0	2861	5	91.7475	0.0339925	2.24976	sp|P00738|HPT_HUMAN	3
MS2.30186.30186.4.0.dta	MS2.30180.30180.4.0.dta	4605.91	YFTPJKTEDTIFLR	null	1744.89	6-5-3-0-0	2861	4	91.0551	0.0184525	2.81368	sp|P02763|A1AG1_HUMAN/sp|P19652|A1AG2_HUMAN	1
MS2.8175.8175.3.1.dta	MS2.8169.8169.3.1.dta	3372.34	MVSHHJLTTGA	null	1167.56	5-4-2-0-0	2204.77	5	90.6925	0.0104025	2.46817	sp|P00738|HPT_HUMAN/sp|P00739|HPTR_HUMAN	1
MS2.34074.34074.5.0.dta	MS2.34068.34068.5.0.dta	4641.04	LVPVPITJATLDQITGK	null	1780.02	6-5-3-0-0	2861	7	90.4279	0.0170525	2.26922	sp|P02763|A1AG1_HUMAN	3
MS2.30371.30371.4.0.dta	MS2.30366.30366.4.0.dta	4747.11	VVLHPJYSQVDIGLIK	null	1795.01	8-6-1-0-1	2952.05	5	90.3548	0.0446725	5.58723	sp|P00738|HPT_HUMAN	3
MS2.25810.25810.4.0.dta	MS2.25805.25805.4.0.dta	3507.51	SIJTTNVMGTSLTVR	null	1593.83	5-4-1-0-0	1913.68	2	90.2846	0.0107125	1.27797	sp|P01023|A2MG_HUMAN	1
MS2.14721.14721.3.0.dta	MS2.14715.14715.3.0.dta	2967.2	EEQFJSTFR	null	1157.52	4-5-0-0-1	1809.67	4	89.9939	0.00862253	0.05132	sp|P01859|IGHG2_HUMAN	1
MS2.4676.4676.3.0.dta	MS2.4670.4670.3.0.dta	2833.18	YKJNSDISSTR	null	1284.62	4-3-1-0-0	1548.54	2	89.9152	0.0124725	1.82131	sp|P01871|IGHM_HUMAN	1
MS2.25254.25254.3.0.dta	MS2.25248.25248.3.0.dta	3850.72	LVPVPITJATLDR	null	1408.82	7-5-0-0-2	2441.88	7	89.6421	0.0215725	1.92617	sp|P19652|A1AG2_HUMAN	1
MS2.25318.25318.3.2.dta	MS2.25309.25309.3.2.dta	3670.59	SIJTTNVMGTSLTVR	null	1593.83	6-4-0-0-2	2076.75	2	88.964	0.0117225	1.2835	sp|P01023|A2MG_HUMAN	1
MS2.26594.26594.3.0.dta	MS2.26588.26588.3.0.dta	4415.85	GLTFQQJASSMCVPDQDTAIR	12,C(Carbamidomethyl[C]);	2339.08	6-4-0-0-2	2076.75	6	88.6275	0.0259225	3.68728	sp|P01871|IGHM_HUMAN	2
MS2.3947.3947.3.1.dta	MS2.3941.3941.3.1.dta	3366.26	NEEYJK	null	796.347	6-5-2-0-0	2569.9	4	88.5722	0.00870253	-0.25999	sp|P02763|A1AG1_HUMAN/sp|P19652|A1AG2_HUMAN	1
MS2.30754.30754.4.0.dta	MS2.30748.30748.4.0.dta	5076.1	MVSHHJLTTGATLINEQW	null	2052	7-5-2-0-2	3024.07	5	88.5291	0.0308425	3.13709	sp|P00738|HPT_HUMAN/sp|P00739|HPTR_HUMAN	1
MS2.30447.30447.4.0.dta	MS2.30440.30440.4.0.dta	4243.83	LAGKPTHVJVSVVMAEVDGTC	21,C(Carbamidomethyl[C]);	2184.08	5-4-1-0-1	2059.73	8	88.3959	0.0171925	1.09627	sp|P01876|IGHA1_HUMAN	3
MS2.8212.8212.3.1.dta	MS2.8206.8206.3.1.dta	3473.39	MVSHHJLTTGAT	null	1268.61	5-4-2-0-0	2204.77	5	88.327	0.0110125	1.1801	sp|P00738|HPT_HUMAN/sp|P00739|HPTR_HUMAN	1
MS2.26034.26034.3.0.dta	MS2.26028.26028.3.0.dta	3345.46	SIJTTNVMGTSLTVR	null	1593.83	4-4-1-0-0	1751.62	2	88.2105	0.0130325	-0.56331	sp|P01023|A2MG_HUMAN	1
MS2.27087.27087.3.1.dta	MS2.27081.27081.3.1.dta	3995.76	LVPVPITJATLDR	null	1408.82	7-5-1-0-1	2586.92	7	87.7525	0.0262125	2.96498	sp|P19652|A1AG2_HUMAN	1
MS2.25884.25884.3.1.dta	MS2.25878.25878.3.1.dta	3467.48	SIJTTNVMGTSLTVR	null	1593.83	6-3-0-0-2	1873.67	2	87.2253	-0.0179975	-5.28202	sp|P01023|A2MG_HUMAN	1
MS2.11830.11830.3.0.dta	MS2.11824.11824.3.0.dta	2727.21	TPLTAJITK	null	958.557	5-4-0-0-1	1768.64	5	87.0904	0.00986253	0.58656	sp|P01877|IGHA2_HUMAN	1
MS2.3899.3899.3.0.dta	MS2.3893.3893.3.0.dta	3492.36	EJGTISR	null	776.39	6-5-2-0-1	2715.96	1	86.9937	0.00809253	1.35598	sp|P02763|A1AG1_HUMAN	3
MS2.30521.30521.3.0.dta	MS2.30515.30515.3.0.dta	4243.83	LAGKPTHVJVSVVMAEVDGTC	21,C(Carbamidomethyl[C]);	2184.08	5-4-1-0-1	2059.73	8	86.6898	0.0177325	1.13724	sp|P01876|IGHA1_HUMAN	2
MS2.22401.22401.4.0.dta	MS2.22395.22395.4.0.dta	4431.84	GLTFQQJASSMCVPDQDTAIR	11,M(Oxidation[M]);12,C(Carbamidomethyl[C]);	2355.07	6-4-0-0-2	2076.75	6	85.9065	0.0220725	2.89637	sp|P01871|IGHM_HUMAN	2
MS2.3984.3984.3.0.dta	MS2.3978.3978.3.0.dta	3001.14	NEEYJK	null	796.347	5-4-2-0-0	2204.77	4	85.8466	0.0180525	2.92388	sp|P02763|A1AG1_HUMAN/sp|P19652|A1AG2_HUMAN	1
MS2.31166.31166.4.4.dta	MS2.31160.31160.4.4.dta	4366.94	VVLHPJYSQVDIGLIK	null	1795.01	6-5-0-0-4	2571.95	5	85.0284	-0.0173575	-4.20363	sp|P00738|HPT_HUMAN	1
MS2.25772.25772.3.0.dta	MS2.25766.25766.3.0.dta	3507.52	SIJTTNVMGTSLTVR	null	1593.83	5-4-1-0-0	1913.68	2	85.4553	0.0180025	-0.54181	sp|P01023|A2MG_HUMAN	1
MS2.4045.4045.3.1.dta	MS2.4039.4039.3.1.dta	3804.42	NEEYJK	null	796.347	6-5-2-0-3	3008.08	4	84.8101	-0.00588747	-1.15706	sp|P02763|A1AG1_HUMAN/sp|P19652|A1AG2_HUMAN	1
MS2.26974.26974.4.3.dta	MS2.26969.26969.4.3.dta	3980.74	LVPVPITJATLDR	null	1408.82	6-5-0-0-4	2571.95	7	84.2435	-0.0240075	-4.83701	sp|P19652|A1AG2_HUMAN	1
MS2.27166.27166.3.0.dta	MS2.27161.27161.3.0.dta	3613.59	LVPVPITJATLDR	null	1408.82	5-4-2-0-0	2204.77	7	84.6549	0.00408253	0.53122	sp|P19652|A1AG2_HUMAN	1
MS2.22561.22561.4.0.dta	MS2.22555.22555.4.0.dta	4414.82	GLTFQQJASSMCVPDQDTAIR	11,M(Oxidation[M]);12,C(Carbamidomethyl[C]);	2355.07	5-4-1-0-1	2059.73	6	84.0205	0.0121825	0.66442	sp|P01871|IGHM_HUMAN	2
MS2.34337.34337.3.0.dta	MS2.34328.34328.3.0.dta	4191.87	MVSHHJLTTGATLINEQWLL	null	2278.16	5-4-1-0-0	1913.68	5	83.9461	0.0236025	1.01426	sp|P00738|HPT_HUMAN/sp|P00739|HPTR_HUMAN	2
MS2.25774.25774.3.1.dta	MS2.25767.25767.3.1.dta	3524.54	SIJTTNVMGTSLTVR	null	1593.83	6-4-0-0-1	1930.69	2	83.7616	0.0198425	1.22828	sp|P01023|A2MG_HUMAN	1
MS2.25328.25328.4.1.dta	MS2.25324.25324.4.1.dta	3704.66	LVPVPITJATLDR	null	1408.82	7-5-0-0-1	2295.82	7	83.6432	0.0188925	1.96636	sp|P19652|A1AG2_HUMAN	1
MS2.29855.29855.4.1.dta	MS2.29849.29849.4.1.dta	4256.79	MVSHHJLTTGATLINEQW	null	2052	5-4-2-0-0	2204.77	5	82.815	0.0169225	1.85195	sp|P00738|HPT_HUMAN/sp|P00739|HPTR_HUMAN	3
MS2.32727.32727.4.1.dta	MS2.32720.32720.4.1.dta	4075.88	LVPVPITJATLDQITGK	null	1780.02	7-5-0-0-1	2295.82	7	82.7107	0.0364125	2.85552	sp|P02763|A1AG1_HUMAN	1
MS2.35088.35088.3.0.dta	MS2.35082.35082.3.0.dta	4482.97	MVSHHJLTTGATLINEQWLL	null	2278.16	5-4-2-0-0	2204.77	5	82.4443	0.0314525	4.07254	sp|P00738|HPT_HUMAN/sp|P00739|HPTR_HUMAN	3
MS2.26556.26556.3.0.dta	MS2.26550.26550.3.0.dta	4398.82	GLTFQQJASSMCVPDQDTAIR	12,C(Carbamidomethyl[C]);	2339.08	5-4-1-0-1	2059.73	6	82.3294	0.0145725	2.07788	sp|P01871|IGHM_HUMAN	2
MS2.11202.11202.3.0.dta	MS2.11196.11196.3.0.dta	3233.26	EEQFJSTYR	null	1173.52	5-4-1-0-1	2059.73	4	81.0618	0.00777253	1.35826	sp|P01861|IGHG4_HUMAN	3
MS2.4095.4095.3.2.dta	MS2.4089.4089.3.2.dta	2907.15	JNSDISSTR	null	993.46	5-4-1-0-0	1913.68	0	81.7589	0.00907253	1.86697	sp|P01871|IGHM_HUMAN	1
MS2.31241.31241.3.0.dta	MS2.31236.31236.3.0.dta	3999.81	VVLHPJYSQVDIGLIK	null	1795.01	5-4-2-0-0	2204.77	5	80.805	0.0289925	2.98498	sp|P00738|HPT_HUMAN	1
MS2.3503.3503.3.0.dta	MS2.3499.3499.3.0.dta	3512.32	NEEYJK	null	796.347	6-5-2-0-1	2715.96	4	80.7067	0.0151925	2.17219	sp|P02763|A1AG1_HUMAN/sp|P19652|A1AG2_HUMAN	1
MS2.31940.31940.4.1.dta	MS2.31935.31935.4.1.dta	5055.21	VVLHPJYSQVDIGLIK	null	1795.01	9-6-1-0-2	3260.16	5	80.625	0.0343625	3.49346	sp|P00738|HPT_HUMAN	1
MS2.30186.30186.4.5.dta	MS2.30180.30180.4.5.dta	4607.91	YFTPJKTEDTIFLR	null	1744.89	6-5-1-0-4	2863.04	4	79.9523	-0.0178875	-3.19113	sp|P02763|A1AG1_HUMAN/sp|P19652|A1AG2_HUMAN	1
MS2.32067.32067.3.2.dta	MS2.32061.32061.3.2.dta	4658.04	VVLHPJYSQVDIGLIK	null	1795.01	6-5-1-0-4	2863.04	5	79.6774	-0.00879747	-3.94369	sp|P00738|HPT_HUMAN	1
MS2.32429.32429.4.1.dta	MS2.32423.32423.4.1.dta	4593.11	MVSHHJLTTGATLINEQWLLTTAK	null	2679.39	5-4-1-0-0	1913.68	5	80.0743	0.0375125	4.91492	sp|P00738|HPT_HUMAN/sp|P00739|HPTR_HUMAN	2
MS2.4058.4058.3.0.dta	MS2.4052.4052.3.0.dta	2762.11	JNSDISSTR	null	993.46	5-4-0-0-1	1768.64	0	79.6122	0.0103025	1.89316	sp|P01871|IGHM_HUMAN	1
MS2.4267.4267.2.0.dta	MS2.4262.4262.2.0.dta	3053.2	JNSDISSTR	null	993.46	5-4-1-0-1	2059.73	0	78.8234	0.00380253	0.21219	sp|P01871|IGHM_HUMAN	1
MS2.3096.3096.3.0.dta	MS2.3090.3090.3.0.dta	3001.13	NEEYJK	null	796.347	5-4-2-0-0	2204.77	4	78.0969	0.0108925	0.97666	sp|P02763|A1AG1_HUMAN/sp|P19652|A1AG2_HUMAN	1
MS2.13009.13009.3.0.dta	MS2.13003.13003.3.0.dta	3035.32	TPLTAJITK	null	958.557	6-4-0-0-2	2076.75	5	78.0556	0.0177725	2.78571	sp|P01877|IGHA2_HUMAN	1
MS2.30188.30188.4.0.dta	MS2.30181.30181.4.0.dta	4243.83	LAGKPTHVJVSVVMAEVDGTC	21,C(Carbamidomethyl[C]);	2184.08	5-4-1-0-1	2059.73	8	78.0291	0.0151925	-1.09371	sp|P01876|IGHA1_HUMAN	2
MS2.9700.9700.3.0.dta	MS2.9694.9694.3.0.dta	3339.3	YFTPJK	null	769.388	6-5-2-0-0	2569.9	4	78.0217	0.0114425	0.37336	sp|P02763|A1AG1_HUMAN/sp|P19652|A1AG2_HUMAN	1
MS2.31771.31771.4.0.dta	MS2.31765.31765.4.0.dta	4534.94	FYFTPJKTEDTIFLR	null	1891.96	5-4-2-0-3	2642.95	5	77.7346	0.0315125	2.78998	sp|P02763|A1AG1_HUMAN/sp|P19652|A1AG2_HUMAN	1
MS2.4023.4023.3.0.dta	MS2.4016.4016.3.0.dta	3383.29	NEEYJK	null	796.347	7-5-1-0-1	2586.92	4	77.3444	0.0225925	2.8489	sp|P02763|A1AG1_HUMAN/sp|P19652|A1AG2_HUMAN	1
MS2.3996.3996.3.0.dta	MS2.3990.3990.3.0.dta	3513.33	NEEYJK	null	796.347	6-5-1-0-3	2716.98	4	76.8974	-0.000987467	-0.28761	sp|P02763|A1AG1_HUMAN/sp|P19652|A1AG2_HUMAN	1
MS2.26793.26793.3.0.dta	MS2.26787.26787.3.0.dta	4398.82	GLTFQQJASSMCVPDQDTAIR	12,C(Carbamidomethyl[C]);	2339.08	5-4-1-0-1	2059.73	6	76.4884	0.0135725	0.87672	sp|P01871|IGHM_HUMAN	2
MS2.26370.26370.3.0.dta	MS2.26364.26364.3.0.dta	3345.47	SIJTTNVMGTSLTVR	null	1593.83	4-4-1-0-0	1751.62	2	76.2409	0.0170825	1.20829	sp|P01023|A2MG_HUMAN	1
MS2.4355.4355.2.0.dta	MS2.4350.4350.2.0.dta	2688.08	JNSDISSTR	null	993.46	4-3-1-0-1	1694.6	0	75.6812	0.0133025	4.00846	sp|P01871|IGHM_HUMAN	1
MS2.27544.27544.4.1.dta	MS2.27538.27538.4.1.dta	4330.82	MVSHHJLTTGATLINEQW	null	2052	6-5-1-0-0	2278.81	5	75.1899	0.0118525	4.31485	sp|P00738|HPT_HUMAN/sp|P00739|HPTR_HUMAN	3
MS2.25996.25996.3.0.dta	MS2.25990.25990.3.0.dta	3507.52	SIJTTNVMGTSLTVR	null	1593.83	5-4-1-0-0	1913.68	2	74.7993	0.0148225	1.61868	sp|P01023|A2MG_HUMAN	1
MS2.25078.25078.4.0.dta	MS2.25073.25073.4.0.dta	3850.72	LVPVPITJATLDR	null	1408.82	7-5-0-0-2	2441.88	7	74.7374	0.0208425	2.19989	sp|P19652|A1AG2_HUMAN	1
MS2.4169.4169.3.0.dta	MS2.4163.4163.3.0.dta	3657.36	NEEYJK	null	796.347	6-5-3-0-0	2861	4	74.5508	0.0131425	0.76135	sp|P02763|A1AG1_HUMAN/sp|P19652|A1AG2_HUMAN	1
MS2.34938.34938.4.0.dta	MS2.34933.34933.4.0.dta	4865.1	MVSHHJLTTGATLINEQWLL	null	2278.16	7-5-1-0-1	2586.92	5	74.5231	0.0114425	-0.38665	sp|P00738|HPT_HUMAN/sp|P00739|HPTR_HUMAN	2
MS2.6818.6818.2.0.dta	MS2.6813.6813.2.0.dta	2958.17	EEQYJSTYR	null	1189.51	5-4-0-0-1	1768.64	4	74.2113	0.0149825	2.12733	sp|P01857|IGHG1_HUMAN	1
MS2.6362.6362.3.0.dta	MS2.6356.6356.3.0.dta	3344.37	YKJNSDISSTR	null	1284.62	5-4-1-0-1	2059.73	2	74.0693	0.0131225	3.09321	sp|P01871|IGHM_HUMAN	3
MS2.3615.3615.3.0.dta	MS2.3610.3610.3.0.dta	3075.16	NEEYJK	null	796.347	6-5-1-0-0	2278.81	4	73.6642	0.00837253	1.60815	sp|P02763|A1AG1_HUMAN/sp|P19652|A1AG2_HUMAN	1
MS2.4391.4391.3.0.dta	MS2.4385.4385.3.0.dta	2501.05	YKJNSDISSTR	null	1284.62	5-2-0-0-0	1216.42	2	73.4381	0.00753253	0.56997	sp|P01871|IGHM_HUMAN	1
MS2.23966.23966.3.0.dta	MS2.23959.23959.3.0.dta	3216.42	SIJTTNVMGTSLTVR	null	1593.83	5-4-0-0-0	1622.58	2	73.4104	0.00962253	0.46825	sp|P01023|A2MG_HUMAN	1
MS2.3281.3281.2.0.dta	MS2.3275.3275.2.0.dta	2418.94	NEEYJK	null	796.347	5-4-0-0-0	1622.58	4	73.2785	0.00968253	2.08777	sp|P02763|A1AG1_HUMAN/sp|P19652|A1AG2_HUMAN	1
MS2.33424.33424.3.1.dta	MS2.33418.33418.3.1.dta	4351.97	LVPVPITJATLDQITGK	null	1780.02	6-5-0-0-4	2571.95	7	72.872	0.00252253	-4.58277	sp|P02763|A1AG1_HUMAN	1
MS2.4539.4539.3.0.dta	MS2.4533.4533.3.0.dta	3110.29	YKJNSDISSTR	null	1284.62	5-5-0-0-0	1825.66	2	72.9406	0.00887253	-0.00879	sp|P01871|IGHM_HUMAN	1
MS2.8026.8026.3.0.dta	MS2.8020.8020.3.0.dta	3249.27	EEQYJSTYR	null	1189.51	5-4-1-0-1	2059.73	4	72.7475	0.0199425	3.0718	sp|P01857|IGHG1_HUMAN	3
MS2.3874.3874.3.0.dta	MS2.3869.3869.3.0.dta	3147.19	NEEYJK	null	796.347	5-4-2-0-1	2350.83	4	72.7048	0.0103425	0.81863	sp|P02763|A1AG1_HUMAN/sp|P19652|A1AG2_HUMAN	1
MS2.25256.25256.3.0.dta	MS2.25249.25249.3.0.dta	4550.93	LAGKPTHVJVSVVMAEVDGTC	14,M(Oxidation[M]);21,C(Carbamidomethyl[C]);	2200.07	5-4-2-0-1	2350.83	8	72.6762	0.0217925	6.20066	sp|P01876|IGHA1_HUMAN	2
MS2.3355.3355.3.2.dta	MS2.3351.3351.3.2.dta	3159.24	RNEEYJK	null	952.448	5-4-0-0-4	2206.81	5	72.3706	-0.0240975	-6.51379	sp|P02763|A1AG1_HUMAN/sp|P19652|A1AG2_HUMAN	3
MS2.33622.33622.3.1.dta	MS2.33616.33616.3.1.dta	4753	FYFTPJKTEDTIFLR	null	1891.96	6-5-3-0-0	2861	5	72.507	0.0416425	3.54433	sp|P02763|A1AG1_HUMAN/sp|P19652|A1AG2_HUMAN	1
MS2.3788.3788.3.0.dta	MS2.3782.3782.3.0.dta	2866.12	JNSDISSTR	null	993.46	6-3-1-0-0	1872.65	0	72.3025	0.00942253	1.80389	sp|P01871|IGHM_HUMAN	3
MS2.10328.10328.3.0.dta	MS2.10321.10321.3.0.dta	2780.11	EEQFJSTYR	null	1173.52	4-4-0-0-1	1606.59	4	72.1698	0.00735253	0.77695	sp|P01861|IGHG4_HUMAN	3
MS2.32926.32926.3.1.dta	MS2.32920.32920.3.1.dta	4461.88	FYFTPJKTEDTIFLR	null	1891.96	6-5-2-0-0	2569.9	5	71.4933	0.0209625	-0.40897	sp|P02763|A1AG1_HUMAN/sp|P19652|A1AG2_HUMAN	3
MS2.27769.27769.4.1.dta	MS2.27763.27763.4.1.dta	3965.68	MVSHHJLTTGATLINEQW	null	2052	5-4-1-0-0	1913.68	5	71.3977	0.0101225	-1.93797	sp|P00738|HPT_HUMAN/sp|P00739|HPTR_HUMAN	1
MS2.26630.26630.3.0.dta	MS2.26624.26624.3.0.dta	4601.91	GLTFQQJASSMCVPDQDTAIR	12,C(Carbamidomethyl[C]);	2339.08	5-5-1-0-1	2262.81	6	71.3696	0.0191525	1.98485	sp|P01871|IGHM_HUMAN	2
MS2.3616.3616.2.0.dta	MS2.3609.3609.2.0.dta	2710.03	NEEYJK	null	796.347	5-4-1-0-0	1913.68	4	71.2431	0.00971253	1.90066	sp|P02763|A1AG1_HUMAN/sp|P19652|A1AG2_HUMAN	1
MS2.14179.14179.2.0.dta	MS2.14173.14173.2.0.dta	2764.12	EEQFJSTFR	null	1157.52	4-4-0-0-1	1606.59	4	71.2258	0.0117625	2.82727	sp|P01859|IGHG2_HUMAN	1
MS2.14647.14647.2.1.dta	MS2.14641.14641.2.1.dta	2764.12	EEQFJSTFR	null	1157.52	4-4-0-0-1	1606.59	4	71.0738	0.00688253	0.51309	sp|P01859|IGHG2_HUMAN	1
MS2.4045.4045.3.0.dta	MS2.4039.4039.3.0.dta	3803.43	NEEYJK	null	796.347	6-5-3-0-1	3007.06	4	70.5989	0.0203925	1.91645	sp|P02763|A1AG1_HUMAN/sp|P19652|A1AG2_HUMAN	1
MS2.34299.34299.4.1.dta	MS2.34294.34294.4.1.dta	4191.86	MVSHHJLTTGATLINEQWLL	null	2278.16	5-4-1-0-0	1913.68	5	70.5401	0.0228525	2.30175	sp|P00738|HPT_HUMAN/sp|P00739|HPTR_HUMAN	2
MS2.28572.28572.3.1.dta	MS2.28567.28567.3.1.dta	4316.81	YFTPJKTEDTIFLR	null	1744.89	6-5-0-0-4	2571.95	4	70.0117	-0.0253475	-5.71768	sp|P02763|A1AG1_HUMAN/sp|P19652|A1AG2_HUMAN	1
MS2.22736.22736.4.0.dta	MS2.22730.22730.4.0.dta	4634.92	GLTFQQJASSMCVPDQDTAIR	11,M(Oxidation[M]);12,C(Carbamidomethyl[C]);	2355.07	6-5-0-0-2	2279.83	6	70.4053	0.0205125	6.28348	sp|P01871|IGHM_HUMAN	2
MS2.29585.29585.3.0.dta	MS2.29579.29579.3.0.dta	4256.79	MVSHHJLTTGATLINEQW	null	2052	5-4-2-0-0	2204.77	5	70.2196	0.0160125	-2.1248	sp|P00738|HPT_HUMAN/sp|P00739|HPTR_HUMAN	2
MS2.27179.27179.3.0.dta	MS2.27173.27173.3.0.dta	3630.64	LVPVPITJATLDR	null	1408.82	6-4-1-0-1	2221.79	7	69.9539	0.0352925	4.36441	sp|P19652|A1AG2_HUMAN	1
MS2.25303.25303.3.0.dta	MS2.25297.25297.3.0.dta	3653.57	SIJTTNVMGTSLTVR	null	1593.83	5-4-1-0-1	2059.73	2	69.8743	0.00898253	3.40834	sp|P01023|A2MG_HUMAN	3
MS2.34008.34008.3.1.dta	MS2.34003.34003.3.1.dta	4787.13	LVPVPITJATLDQITGK	null	1780.02	6-5-3-0-1	3007.06	7	69.785	0.0469225	6.4648	sp|P02763|A1AG1_HUMAN	1
MS2.25546.25546.3.0.dta	MS2.25540.25540.3.0.dta	3670.6	SIJTTNVMGTSLTVR	null	1593.83	6-4-0-0-2	2076.75	2	69.7704	0.0195725	1.16812	sp|P01023|A2MG_HUMAN	1
MS2.6140.6140.3.0.dta	MS2.6134.6134.3.0.dta	3344.36	YKJNSDISSTR	null	1284.62	5-4-1-0-1	2059.73	2	69.7217	0.0117425	2.76277	sp|P01871|IGHM_HUMAN	3
MS2.6585.6585.3.0.dta	MS2.6579.6579.3.0.dta	3344.36	YKJNSDISSTR	null	1284.62	5-4-1-0-1	2059.73	2	69.5936	0.0115125	2.9131	sp|P01871|IGHM_HUMAN	3
MS2.33497.33497.4.0.dta	MS2.33492.33492.4.0.dta	4496.02	LVPVPITJATLDQITGK	null	1780.02	6-5-2-0-1	2715.96	7	68.9199	0.0388525	3.52339	sp|P02763|A1AG1_HUMAN	2
MS2.2948.2948.3.0.dta	MS2.2942.2942.3.0.dta	2710.03	NEEYJK	null	796.347	5-4-1-0-0	1913.68	4	68.8244	0.0100925	1.24682	sp|P02763|A1AG1_HUMAN/sp|P19652|A1AG2_HUMAN	1
MS2.4246.4246.3.0.dta	MS2.4239.4239.3.0.dta	3637.4	EJGTISR	null	776.39	6-5-3-0-0	2861	1	68.2543	0.0120625	1.99095	sp|P02763|A1AG1_HUMAN	3
MS2.5425.5425.3.0.dta	MS2.5418.5418.3.0.dta	3692.48	YKJNSDISSTR	null	1284.62	5-5-2-0-0	2407.85	2	68.2536	0.0146325	2.62608	sp|P01871|IGHM_HUMAN	3
MS2.25970.25970.3.0.dta	MS2.25965.25965.3.0.dta	3362.49	SIJTTNVMGTSLTVR	null	1593.83	5-4-0-0-1	1768.64	2	68.2519	0.0269125	3.78986	sp|P01023|A2MG_HUMAN	1
MS2.13052.13052.3.0.dta	MS2.13041.13041.3.0.dta	2872.24	TPLTAJITK	null	958.557	5-4-1-0-0	1913.68	5	68.0667	0.00617253	-0.63421	sp|P01877|IGHA2_HUMAN	1
MS2.3665.3665.3.0.dta	MS2.3658.3658.3.0.dta	2856.09	NEEYJK	null	796.347	5-4-1-0-1	2059.73	4	67.6931	0.00837253	1.03779	sp|P02763|A1AG1_HUMAN/sp|P19652|A1AG2_HUMAN	1
MS2.32041.32041.3.3.dta	MS2.32036.32036.3.3.dta	4819.12	VVLHPJYSQVDIGLIK	null	1795.01	7-5-2-0-2	3024.07	5	67.6809	0.0343525	2.72031	sp|P00738|HPT_HUMAN	1
MS2.4171.4171.3.0.dta	MS2.4164.4164.3.0.dta	4002.53	EJGTISR	null	776.39	7-6-3-0-0	3226.13	1	67.3154	0.0119925	1.06409	sp|P02763|A1AG1_HUMAN	3
MS2.7547.7547.3.0.dta	MS2.7541.7541.3.0.dta	2488	EEQYJSTYR	null	1189.51	3-4-0-0-0	1298.48	4	66.9521	0.00970253	0.61477	sp|P01857|IGHG1_HUMAN	1
MS2.33622.33622.3.2.dta	MS2.33616.33616.3.2.dta	4755	FYFTPJKTEDTIFLR	null	1891.96	6-5-1-0-4	2863.04	5	66.3539	0.00147253	-2.94321	sp|P02763|A1AG1_HUMAN/sp|P19652|A1AG2_HUMAN	1
MS2.34937.34937.3.0.dta	MS2.34931.34931.3.0.dta	4498.95	MVSHHJLTTGATLINEQWLL	1,M(Oxidation[M]);	2294.16	5-4-2-0-0	2204.77	5	66.787	0.0203825	2.25799	sp|P00738|HPT_HUMAN/sp|P00739|HPTR_HUMAN	2
MS2.30370.30370.3.0.dta	MS2.30364.30364.3.0.dta	4323.85	CANLVPVPITJATLDR	1,C(Carbamidomethyl[C]);	1753.93	6-5-2-0-0	2569.9	10	66.6252	0.0181625	2.13676	sp|P19652|A1AG2_HUMAN	3
MS2.33633.33633.5.0.dta	MS2.33628.33628.5.0.dta	5327.34	SLGNVJFTVSAEALESQELCGTEVPSVPEHGR	20,C(Carbamidomethyl[C]);	3413.63	5-4-1-0-0	1913.68	5	66.0191	0.0337625	0.7497	sp|P01023|A2MG_HUMAN	2
MS2.25586.25586.3.0.dta	MS2.25579.25579.3.0.dta	3450.49	SIJTTNVMGTSLTVR	null	1593.83	5-3-1-0-1	1856.66	2	66.012	0.00862253	2.38214	sp|P01023|A2MG_HUMAN	3
MS2.5919.5919.3.0.dta	MS2.5912.5912.3.0.dta	3344.36	YKJNSDISSTR	null	1284.62	5-4-1-0-1	2059.73	2	65.8751	0.0106025	2.31514	sp|P01871|IGHM_HUMAN	3
MS2.22322.22322.4.1.dta	MS2.22317.22317.4.1.dta	4634.92	GLTFQQJASSMCVPDQDTAIR	11,M(Oxidation[M]);12,C(Carbamidomethyl[C]);	2355.07	6-5-0-0-2	2279.83	6	65.7822	0.0234825	6.53847	sp|P01871|IGHM_HUMAN	2
MS2.34975.34975.4.0.dta	MS2.34968.34968.4.0.dta	4515.98	MVSHHJLTTGATLINEQWLL	1,M(Oxidation[M]);	2294.16	6-4-1-0-1	2221.79	5	65.7654	0.0318325	3.82905	sp|P00738|HPT_HUMAN/sp|P00739|HPTR_HUMAN	1
MS2.24538.24538.3.0.dta	MS2.24534.24534.3.0.dta	4550.89	LAGKPTHVJVSVVMAEVDGTC	14,M(Oxidation[M]);21,C(Carbamidomethyl[C]);	2200.07	5-4-2-0-1	2350.83	8	65.6859	-0.0120475	-0.50882	sp|P01876|IGHA1_HUMAN	1
MS2.3947.3947.3.3.dta	MS2.3941.3941.3.3.dta	3368.27	NEEYJK	null	796.347	6-5-0-0-4	2571.95	4	64.3142	-0.0204075	-4.10074	sp|P02763|A1AG1_HUMAN/sp|P19652|A1AG2_HUMAN	1
MS2.6994.6994.2.0.dta	MS2.6988.6988.2.0.dta	2634.05	EEQYJSTYR	null	1189.51	3-4-0-0-1	1444.53	4	65.5703	0.00805253	1.82441	sp|P01857|IGHG1_HUMAN	1
MS2.34264.34264.3.1.dta	MS2.34257.34257.3.1.dta	4208.88	MVSHHJLTTGATLINEQWLL	null	2278.16	6-4-0-0-1	1930.69	5	64.7926	0.0226825	2.47506	sp|P00738|HPT_HUMAN/sp|P00739|HPTR_HUMAN	2
MS2.7327.7327.2.0.dta	MS2.7320.7320.2.0.dta	2634.05	EEQYJSTYR	null	1189.51	3-4-0-0-1	1444.53	4	64.142	0.00911253	2.07671	sp|P01857|IGHG1_HUMAN	1
MS2.31556.31556.3.0.dta	MS2.31551.31551.3.0.dta	4738.01	LAGKPTHVJVSVVMAEVDGTC	21,C(Carbamidomethyl[C]);	2184.08	5-5-2-0-1	2553.91	8	63.8568	0.0242125	2.91779	sp|P01876|IGHA1_HUMAN	2
MS2.26832.26832.3.0.dta	MS2.26825.26825.3.0.dta	4618.93	GLTFQQJASSMCVPDQDTAIR	12,C(Carbamidomethyl[C]);	2339.08	6-5-0-0-2	2279.83	6	63.8387	0.0276325	3.84954	sp|P01871|IGHM_HUMAN	2
MS2.4169.4169.3.2.dta	MS2.4163.4163.3.2.dta	3659.37	NEEYJK	null	796.347	6-5-1-0-4	2863.04	4	63.1558	-0.0194075	-3.55039	sp|P02763|A1AG1_HUMAN/sp|P19652|A1AG2_HUMAN	1
MS2.3801.3801.3.0.dta	MS2.3794.3794.3.0.dta	3711.44	EJGTISR	null	776.39	7-6-2-0-0	2935.04	1	63.6675	0.0116925	1.82875	sp|P02763|A1AG1_HUMAN	3
MS2.3577.3577.3.1.dta	MS2.3571.3571.3.1.dta	3383.29	NEEYJK	null	796.347	7-5-1-0-1	2586.92	4	63.4476	0.0250725	2.83842	sp|P02763|A1AG1_HUMAN/sp|P19652|A1AG2_HUMAN	1
MS2.31693.31693.4.1.dta	MS2.31687.31687.4.1.dta	4552.96	FYFTPJKTEDTIFLR	null	1891.96	8-6-0-0-1	2660.96	5	62.9834	0.0410025	3.11379	sp|P02763|A1AG1_HUMAN/sp|P19652|A1AG2_HUMAN	1
MS2.2800.2800.3.0.dta	MS2.2794.2794.3.0.dta	2866.13	RNEEYJK	null	952.448	5-4-1-0-0	1913.68	5	62.7592	0.00818253	0.7888	sp|P02763|A1AG1_HUMAN/sp|P19652|A1AG2_HUMAN	3
MS2.13851.13851.2.0.dta	MS2.13840.13840.2.0.dta	2926.17	EEQFJSTFR	null	1157.52	5-4-0-0-1	1768.64	4	62.4063	0.00720253	0.79081	sp|P01859|IGHG2_HUMAN	3
MS2.5497.5497.3.0.dta	MS2.5491.5491.3.0.dta	3401.39	YKJNSDISSTR	null	1284.62	5-5-1-0-0	2116.76	2	62.1548	0.0110325	2.13968	sp|P01871|IGHM_HUMAN	1
MS2.3689.3689.3.0.dta	MS2.3684.3684.3.0.dta	3366.26	NEEYJK	null	796.347	6-5-2-0-0	2569.9	4	62.1298	0.00999253	0.39067	sp|P02763|A1AG1_HUMAN/sp|P19652|A1AG2_HUMAN	1
MS2.33164.33164.4.1.dta	MS2.33158.33158.4.1.dta	4630.09	SLGNVJFTVSAEALESQELCGTEVPSVPEHGR	20,C(Carbamidomethyl[C]);	3413.63	5-2-0-0-0	1216.42	5	62.0162	0.0353325	2.61403	sp|P01023|A2MG_HUMAN	2
MS2.4895.4895.3.0.dta	MS2.4891.4891.3.0.dta	3709.5	YKJNSDISSTR	null	1284.62	6-5-1-0-1	2424.87	2	61.9817	0.0192925	2.77173	sp|P01871|IGHM_HUMAN	1
MS2.32128.32128.5.0.dta	MS2.32122.32122.5.0.dta	4656.04	VVLHPJYSQVDIGLIK	null	1795.01	6-5-3-0-0	2861	5	61.9517	0.0332725	2.01567	sp|P00738|HPT_HUMAN	1
MS2.26482.26482.3.0.dta	MS2.26477.26477.3.0.dta	4023.71	YFTPJKTEDTIFLR	null	1744.89	6-5-1-0-0	2278.81	4	61.7239	0.0127825	2.53909	sp|P02763|A1AG1_HUMAN/sp|P19652|A1AG2_HUMAN	1
MS2.2735.2735.3.0.dta	MS2.2730.2730.3.0.dta	2575.04	RNEEYJK	null	952.448	5-4-0-0-0	1622.58	5	61.5567	0.0119125	2.00321	sp|P02763|A1AG1_HUMAN/sp|P19652|A1AG2_HUMAN	3
MS2.3874.3874.3.2.dta	MS2.3869.3869.3.2.dta	3149.21	NEEYJK	null	796.347	5-4-0-0-5	2352.87	4	61.2608	-0.0104475	-2.62762	sp|P02763|A1AG1_HUMAN/sp|P19652|A1AG2_HUMAN	1
MS2.31771.31771.4.1.dta	MS2.31765.31765.4.1.dta	4535.94	FYFTPJKTEDTIFLR	null	1891.96	7-6-1-0-0	2643.94	5	60.981	0.0411325	4.81336	sp|P02763|A1AG1_HUMAN/sp|P19652|A1AG2_HUMAN	1
MS2.25511.25511.3.0.dta	MS2.25504.25504.3.0.dta	3653.57	SIJTTNVMGTSLTVR	null	1593.83	5-4-1-0-1	2059.73	2	61.5321	0.0100025	4.03939	sp|P01023|A2MG_HUMAN	1
MS2.25922.25922.3.1.dta	MS2.25917.25917.3.1.dta	3483.51	SIJTTNVMGTSLTVR	null	1593.83	7-3-0-0-1	1889.67	2	60.9376	0.0215625	1.2065	sp|P01023|A2MG_HUMAN	1
MS2.28982.28982.3.0.dta	MS2.28976.28976.3.0.dta	4272.78	MVSHHJLTTGATLINEQW	1,M(Oxidation[M]);	2067.99	5-4-2-0-0	2204.77	5	60.7117	0.0126225	-4.2254	sp|P00738|HPT_HUMAN/sp|P00739|HPTR_HUMAN	2
MS2.4207.4207.3.0.dta	MS2.4202.4202.3.0.dta	3820.44	NEEYJK	null	796.347	7-5-2-0-2	3024.07	4	60.425	0.0239825	2.15764	sp|P02763|A1AG1_HUMAN/sp|P19652|A1AG2_HUMAN	1
MS2.3688.3688.3.1.dta	MS2.3682.3682.3.1.dta	3018.16	NEEYJK	null	796.347	6-4-1-0-1	2221.79	4	60.2788	0.0231925	3.03352	sp|P02763|A1AG1_HUMAN/sp|P19652|A1AG2_HUMAN	1
MS2.3911.3911.3.0.dta	MS2.3906.3906.3.0.dta	2371.94	JNSDISSTR	null	993.46	6-2-0-0-0	1378.48	0	60.0682	0.00563253	0.67584	sp|P01871|IGHM_HUMAN	1
MS2.23159.23159.3.0.dta	MS2.23153.23153.3.0.dta	3534.38	GLTFQQJASSM	null	1183.54	5-4-2-0-1	2350.83	6	59.7905	0.0116125	0.50113	sp|P01871|IGHM_HUMAN/sp|P04220|MUCB_HUMAN	2
MS2.28610.28610.3.0.dta	MS2.28605.28605.3.0.dta	4331.82	YFTPJKTEDTIFLR	null	1744.89	7-5-1-0-1	2586.92	4	59.7784	0.00740253	2.33794	sp|P02763|A1AG1_HUMAN/sp|P19652|A1AG2_HUMAN	1
MS2.15703.15703.2.0.dta	MS2.15698.15698.2.0.dta	3055.22	EEQFJSTFR	null	1157.52	4-4-1-0-1	1897.68	4	59.5059	0.0128525	1.84095	sp|P01859|IGHG2_HUMAN	1
MS2.3614.3614.3.1.dta	MS2.3608.3608.3.1.dta	2727.06	NEEYJK	null	796.347	6-4-0-0-1	1930.69	4	59.3168	0.0232925	3.99388	sp|P02763|A1AG1_HUMAN/sp|P19652|A1AG2_HUMAN	1
MS2.4171.4171.3.1.dta	MS2.4164.4164.3.1.dta	4004.54	EJGTISR	null	776.39	7-6-1-0-4	3228.17	1	58.9876	-0.0181975	-2.0722	sp|P02763|A1AG1_HUMAN	3
MS2.4221.4221.3.0.dta	MS2.4214.4214.3.0.dta	2965.19	JNSDISSTR	null	993.46	5-5-0-0-1	1971.72	0	59.2161	0.00803253	-0.37745	sp|P01871|IGHM_HUMAN	1
MS2.16775.16775.3.0.dta	MS2.16769.16769.3.0.dta	3046.24	VVLHPJY	null	841.457	5-4-2-0-0	2204.77	5	58.9084	0.00988253	1.16618	sp|P00738|HPT_HUMAN	3
MS2.11854.11854.2.0.dta	MS2.11849.11849.2.0.dta	2727.21	TPLTAJITK	null	958.557	5-4-0-0-1	1768.64	5	59.168	0.0107825	1.39798	sp|P01877|IGHA2_HUMAN	1
MS2.32767.32767.4.0.dta	MS2.32761.32761.4.0.dta	4973.08	FYFTPJKTEDTIFLR	null	1891.96	7-6-2-0-1	3081.09	5	58.9874	0.0298325	3.04893	sp|P02763|A1AG1_HUMAN/sp|P19652|A1AG2_HUMAN	1
MS2.22524.22524.3.0.dta	MS2.22518.22518.3.0.dta	4634.93	GLTFQQJASSMCVPDQDTAIR	11,M(Oxidation[M]);12,C(Carbamidomethyl[C]);	2355.07	6-5-0-0-2	2279.83	6	58.888	0.0293725	5.93033	sp|P01871|IGHM_HUMAN	2
MS2.3393.3393.2.0.dta	MS2.3388.3388.2.0.dta	2710.03	NEEYJK	null	796.347	5-4-1-0-0	1913.68	4	58.4112	0.0102625	1.93638	sp|P02763|A1AG1_HUMAN/sp|P19652|A1AG2_HUMAN	1
MS2.2874.2874.3.0.dta	MS2.2868.2868.3.0.dta	3001.13	NEEYJK	null	796.347	5-4-2-0-0	2204.77	4	58.129	0.0113925	1.23114	sp|P02763|A1AG1_HUMAN/sp|P19652|A1AG2_HUMAN	1
MS2.28650.28650.3.0.dta	MS2.28643.28643.3.0.dta	4195.84	CANLVPVPITJATLDR	1,C(Carbamidomethyl[C]);	1753.93	7-5-0-0-2	2441.88	10	58.1148	0.0277025	3.28246	sp|P19652|A1AG2_HUMAN	1
MS2.7549.7549.3.0.dta	MS2.7542.7542.3.0.dta	3344.37	YKJNSDISSTR	null	1284.62	5-4-1-0-1	2059.73	2	58.0971	0.0133625	2.28168	sp|P01871|IGHM_HUMAN	3
MS2.35088.35088.3.1.dta	MS2.35082.35082.3.1.dta	4484.97	MVSHHJLTTGATLINEQWLL	null	2278.16	5-4-0-0-4	2206.81	5	57.2317	-0.0102575	-3.86425	sp|P00738|HPT_HUMAN/sp|P00739|HPTR_HUMAN	2
MS2.31060.31060.3.0.dta	MS2.31049.31049.3.0.dta	3085.31	VSJQTLSLF	null	1008.54	6-4-0-0-2	2076.75	2	57.6065	0.0259125	1.9971	sp|P01023|A2MG_HUMAN	2
MS2.8283.8283.3.0.dta	MS2.8277.8277.3.0.dta	3290.28	EEQYJSTYR	null	1189.51	4-5-1-0-1	2100.76	4	57.0857	0.0106725	1.97989	sp|P01857|IGHG1_HUMAN	3
MS2.26145.26145.3.0.dta	MS2.26140.26140.3.0.dta	4243.82	LAGKPTHVJVSVVMAEVDGTC	21,C(Carbamidomethyl[C]);	2184.08	5-4-1-0-1	2059.73	8	57.048	0.00815253	4.74458	sp|P01876|IGHA1_HUMAN	2
MS2.25884.25884.3.0.dta	MS2.25878.25878.3.0.dta	3466.52	SIJTTNVMGTSLTVR	null	1593.83	6-3-1-0-0	1872.65	2	57.0215	0.0390925	5.69961	sp|P01023|A2MG_HUMAN	1
MS2.7989.7989.3.0.dta	MS2.7984.7984.3.0.dta	3452.34	EEQYJSTYR	null	1189.51	5-5-1-0-1	2262.81	4	56.7706	0.00937253	2.29535	sp|P01857|IGHG1_HUMAN	3
MS2.24725.24725.4.1.dta	MS2.24719.24719.4.1.dta	4151.74	FTPJKTEDTIFLR	null	1581.83	6-5-2-0-0	2569.9	3	56.6927	0.00514253	0.7786	sp|P02763|A1AG1_HUMAN/sp|P19652|A1AG2_HUMAN	3
MS2.31732.31732.5.1.dta	MS2.31725.31725.5.1.dta	4739.01	LAGKPTHVJVSVVMAEVDGTC	21,C(Carbamidomethyl[C]);	2184.08	5-5-1-0-3	2554.93	8	56.7097	0.00101253	-2.0247	sp|P01876|IGHA1_HUMAN	2
MS2.26109.26109.3.0.dta	MS2.26103.26103.3.0.dta	3524.54	SIJTTNVMGTSLTVR	null	1593.83	6-4-0-0-1	1930.69	2	55.7166	0.0228525	3.24507	sp|P01023|A2MG_HUMAN	1
MS2.17510.17510.3.0.dta	MS2.17503.17503.3.0.dta	3997.63	QQJASSMCVPDQDTAIR	8,C(Carbamidomethyl[C]);	1920.85	6-4-0-0-2	2076.75	2	55.4574	0.0219625	2.71885	sp|P01871|IGHM_HUMAN	2
MS2.29819.29819.4.0.dta	MS2.29812.29812.4.0.dta	4971.04	YFTPJKTEDTIFLR	null	1744.89	7-6-3-0-0	3226.13	4	55.4145	0.0145825	1.11434	sp|P02763|A1AG1_HUMAN/sp|P19652|A1AG2_HUMAN	1
MS2.30260.30260.3.1.dta	MS2.30255.30255.3.1.dta	4486.93	CANLVPVPITJATLDR	1,C(Carbamidomethyl[C]);	1753.93	7-5-1-0-2	2732.98	10	55.3386	0.0213725	0.8184	sp|P19652|A1AG2_HUMAN	1
MS2.7068.7068.3.1.dta	MS2.7061.7061.3.1.dta	3344.36	YKJNSDISSTR	null	1284.62	5-4-1-0-1	2059.73	2	54.7485	0.0114625	2.69393	sp|P01871|IGHM_HUMAN	3
MS2.22598.22598.4.0.dta	MS2.22592.22592.4.0.dta	4617.9	GLTFQQJASSMCVPDQDTAIR	11,M(Oxidation[M]);12,C(Carbamidomethyl[C]);	2355.07	5-5-1-0-1	2262.81	6	54.7469	0.0195425	2.78301	sp|P01871|IGHM_HUMAN	2
MS2.23267.23267.3.1.dta	MS2.23262.23262.3.1.dta	3754.49	GLTFQQJASSM	null	1183.54	6-5-1-0-2	2570.93	6	54.6563	0.0279425	1.41494	sp|P01871|IGHM_HUMAN/sp|P04220|MUCB_HUMAN	2
MS2.27089.27089.4.0.dta	MS2.27082.27082.4.0.dta	4601.9	GLTFQQJASSMCVPDQDTAIR	12,C(Carbamidomethyl[C]);	2339.08	5-5-1-0-1	2262.81	6	54.4727	0.0138625	4.96303	sp|P01871|IGHM_HUMAN	2
MS2.27956.27956.3.1.dta	MS2.27950.27950.3.1.dta	4679.95	YFTPJKTEDTIFLR	null	1744.89	7-6-2-0-0	2935.04	4	54.3679	0.0184825	4.27015	sp|P02763|A1AG1_HUMAN/sp|P19652|A1AG2_HUMAN	1
MS2.3984.3984.4.3.dta	MS2.3978.3978.4.3.dta	4002.51	NEEYJK	null	796.347	6-11-0-0-0	3206.19	4	54.1761	-0.0234875	-3.8795	sp|P02763|A1AG1_HUMAN/sp|P19652|A1AG2_HUMAN	1
MS2.28718.28718.4.1.dta	MS2.28711.28711.4.1.dta	4032.75	CANLVPVPITJATLDR	1,C(Carbamidomethyl[C]);	1753.93	6-5-1-0-0	2278.81	10	54.1206	0.00932253	0.6107	sp|P19652|A1AG2_HUMAN	3
MS2.30299.30299.4.1.dta	MS2.30293.30293.4.1.dta	4340.88	CANLVPVPITJATLDR	1,C(Carbamidomethyl[C]);	1753.93	7-5-1-0-1	2586.92	10	53.6561	0.0321025	3.34059	sp|P19652|A1AG2_HUMAN	1
MS2.30832.30832.3.0.dta	MS2.30824.30824.3.0.dta	4730.07	VVLHPJYSQVDIGLIK	null	1795.01	7-6-2-0-0	2935.04	5	53.419	0.0247725	2.78532	sp|P00738|HPT_HUMAN	1
MS2.5423.5423.3.0.dta	MS2.5417.5417.3.0.dta	3344.37	YKJNSDISSTR	null	1284.62	5-4-1-0-1	2059.73	2	53.3959	0.0122625	1.62211	sp|P01871|IGHM_HUMAN	1
MS2.29357.29357.3.0.dta	MS2.29351.29351.3.0.dta	4073.83	VVLHPJYSQVDIGLIK	null	1795.01	6-5-1-0-0	2278.81	5	53.1876	0.0104225	1.93102	sp|P00738|HPT_HUMAN	1
MS2.30828.30828.3.0.dta	MS2.30823.30823.3.0.dta	4913.01	MVSHHJLTTGATLINEQW	null	2052	6-5-3-0-0	2861	5	53.1397	0.00987253	-0.51286	sp|P00738|HPT_HUMAN/sp|P00739|HPTR_HUMAN	2
MS2.18907.18907.4.2.dta	MS2.18901.18901.4.2.dta	4329.92	TCTAAHPELKTPLTAJITK	2,C(Carbamidomethyl[C]);	2067.09	5-5-1-0-1	2262.81	15	53.1056	0.0126925	4.42702	sp|P01877|IGHA2_HUMAN	3
MS2.7142.7142.2.0.dta	MS2.7135.7135.2.0.dta	2958.16	EEQYJSTYR	null	1189.51	5-4-0-0-1	1768.64	4	53.0608	0.00995253	2.38321	sp|P01857|IGHG1_HUMAN	3
MS2.10474.10474.3.0.dta	MS2.10468.10468.3.0.dta	2618.06	EEQFJSTYR	null	1173.52	3-4-0-0-1	1444.53	4	53.0273	0.00475253	1.47764	sp|P01861|IGHG4_HUMAN	3
MS2.7312.7312.2.1.dta	MS2.7306.7306.2.1.dta	2999.19	EEQYJSTYR	null	1189.51	4-5-0-0-1	1809.67	4	52.5869	0.0109525	2.50171	sp|P01857|IGHG1_HUMAN	3
MS2.28717.28717.4.1.dta	MS2.28712.28712.4.1.dta	4049.77	CANLVPVPITJATLDR	1,C(Carbamidomethyl[C]);	1753.93	7-5-0-0-1	2295.82	10	52.2341	0.0174025	0.52418	sp|P19652|A1AG2_HUMAN	1
MS2.3578.3578.3.0.dta	MS2.3573.3573.3.0.dta	4019.56	EJGTISR	null	776.39	8-6-2-0-1	3243.15	1	52.1036	0.0257625	2.74237	sp|P02763|A1AG1_HUMAN	3
MS2.3764.3764.3.2.dta	MS2.3757.3757.3.2.dta	3514.33	NEEYJK	null	796.347	8-7-0-0-0	2717.98	4	51.8621	0.00599253	0.97914	sp|P02763|A1AG1_HUMAN/sp|P19652|A1AG2_HUMAN	1
MS2.14427.14427.2.0.dta	MS2.14420.14420.2.0.dta	2764.12	EEQFJSTFR	null	1157.52	4-4-0-0-1	1606.59	4	51.7843	0.0105325	0.5101	sp|P01859|IGHG2_HUMAN	1
MS2.3369.3369.3.0.dta	MS2.3363.3363.3.0.dta	2784.07	NEEYJK	null	796.347	6-5-0-0-0	1987.71	4	51.3959	0.0115625	1.79673	sp|P02763|A1AG1_HUMAN/sp|P19652|A1AG2_HUMAN	1
MS2.33610.33610.3.0.dta	MS2.33604.33604.3.0.dta	4366.99	LVPVPITJATLDQITGK	null	1780.02	7-5-1-0-1	2586.92	7	51.6186	0.0495825	3.31328	sp|P02763|A1AG1_HUMAN	1
MS2.29892.29892.3.0.dta	MS2.29886.29886.3.0.dta	4256.79	MVSHHJLTTGATLINEQW	null	2052	5-4-2-0-0	2204.77	5	51.1844	0.0167425	0.47496	sp|P00738|HPT_HUMAN/sp|P00739|HPTR_HUMAN	2
MS2.32694.32694.3.0.dta	MS2.32683.32683.3.0.dta	4827.04	FYFTPJKTEDTIFLR	null	1891.96	7-6-2-0-0	2935.04	5	51.1615	0.0394925	2.2967	sp|P02763|A1AG1_HUMAN/sp|P19652|A1AG2_HUMAN	1
MS2.32204.32204.3.0.dta	MS2.32198.32198.3.0.dta	4593.1	MVSHHJLTTGATLINEQWLLTTAK	null	2679.39	5-4-1-0-0	1913.68	5	50.9608	0.0320825	1.75786	sp|P00738|HPT_HUMAN/sp|P00739|HPTR_HUMAN	1
MS2.4354.4354.3.3.dta	MS2.4348.4348.3.3.dta	3054.21	JNSDISSTR	null	993.46	5-4-0-0-3	2060.76	0	50.9456	-0.00508747	-2.70431	sp|P01871|IGHM_HUMAN	1
MS2.4206.4206.3.2.dta	MS2.4200.4200.3.2.dta	3367.26	NEEYJK	null	796.347	6-5-1-0-2	2570.93	4	50.9255	-0.00887747	-2.33894	sp|P02763|A1AG1_HUMAN/sp|P19652|A1AG2_HUMAN	1
MS2.27895.27895.4.1.dta	MS2.27889.27889.4.1.dta	4287.86	LVPVPITJATLDR	null	1408.82	7-5-1-0-3	2879.04	7	50.6796	0.00572253	0.78131	sp|P19652|A1AG2_HUMAN	1
MS2.18982.18982.4.1.dta	MS2.18976.18976.4.1.dta	4126.83	TCTAAHPELKTPLTAJITK	2,C(Carbamidomethyl[C]);	2067.09	5-4-1-0-1	2059.73	15	50.2868	0.00690253	2.44533	sp|P01877|IGHA2_HUMAN	3
MS2.8028.8028.3.0.dta	MS2.8021.8021.3.0.dta	3104.23	EEQYJSTYR	null	1189.51	5-4-0-0-2	1914.7	4	50.0478	0.0229025	5.08377	sp|P01857|IGHG1_HUMAN	1
MS2.14145.14145.2.0.dta	MS2.14139.14139.2.0.dta	2926.17	EEQFJSTFR	null	1157.52	5-4-0-0-1	1768.64	4	49.6918	0.00694253	0.86256	sp|P01859|IGHG2_HUMAN	3
MS2.30832.30832.3.1.dta	MS2.30824.30824.3.1.dta	4732.07	VVLHPJYSQVDIGLIK	null	1795.01	7-6-0-0-4	2937.08	5	49.2818	-0.0177075	-1.92936	sp|P00738|HPT_HUMAN	1
MS2.3061.3061.2.1.dta	MS2.3054.3054.2.1.dta	2418.94	NEEYJK	null	796.347	5-4-0-0-0	1622.58	4	49.6112	0.00957253	2.45275	sp|P02763|A1AG1_HUMAN/sp|P19652|A1AG2_HUMAN	1
MS2.9062.9062.3.0.dta	MS2.9057.9057.3.0.dta	3048.21	YFTPJK	null	769.388	6-5-1-0-0	2278.81	4	49.5995	0.0120325	0.70741	sp|P02763|A1AG1_HUMAN/sp|P19652|A1AG2_HUMAN	3
MS2.30446.30446.3.0.dta	MS2.30441.30441.3.0.dta	4446.91	LAGKPTHVJVSVVMAEVDGTC	21,C(Carbamidomethyl[C]);	2184.08	5-5-1-0-1	2262.81	8	49.111	0.0151925	0.45603	sp|P01876|IGHA1_HUMAN	2
MS2.34974.34974.3.1.dta	MS2.34969.34969.3.1.dta	4515.97	MVSHHJLTTGATLINEQWLL	1,M(Oxidation[M]);	2294.16	6-4-1-0-1	2221.79	5	49.0989	0.0186425	3.90803	sp|P00738|HPT_HUMAN/sp|P00739|HPTR_HUMAN	3
MS2.8322.8322.3.0.dta	MS2.8315.8315.3.0.dta	3344.37	YKJNSDISSTR	null	1284.62	5-4-1-0-1	2059.73	2	48.8931	0.0145825	3.61018	sp|P01871|IGHM_HUMAN	3
MS2.27470.27470.3.0.dta	MS2.27464.27464.3.0.dta	4737.98	LAGKPTHVJVSVVMAEVDGTC	21,C(Carbamidomethyl[C]);	2184.08	5-5-2-0-1	2553.91	8	48.8623	-0.00527747	3.54594	sp|P01876|IGHA1_HUMAN	3
MS2.34008.34008.3.2.dta	MS2.34003.34003.3.2.dta	4789.11	LVPVPITJATLDQITGK	null	1780.02	8-7-1-0-0	3009.07	7	48.7176	0.0196325	2.65277	sp|P02763|A1AG1_HUMAN	1
MS2.14245.14245.3.0.dta	MS2.14239.14239.3.0.dta	2926.17	EEQFJSTFR	null	1157.52	5-4-0-0-1	1768.64	4	48.6444	0.00936253	1.22628	sp|P01859|IGHG2_HUMAN	3
MS2.3824.3824.3.0.dta	MS2.3818.3818.3.0.dta	3164.2	NEEYJK	null	796.347	6-4-1-0-2	2367.85	4	48.2794	0.00625253	0.37471	sp|P02763|A1AG1_HUMAN/sp|P19652|A1AG2_HUMAN	1
MS2.5065.5065.3.0.dta	MS2.5060.5060.3.0.dta	3303.34	YKJNSDISSTR	null	1284.62	6-3-1-0-1	2018.71	2	48.223	0.0117425	1.59621	sp|P01871|IGHM_HUMAN	3
MS2.3776.3776.3.0.dta	MS2.3770.3770.3.0.dta	3675.38	NEEYJK	null	796.347	7-5-1-0-3	2879.04	4	48.144	0.00168253	0.53207	sp|P02763|A1AG1_HUMAN/sp|P19652|A1AG2_HUMAN	1
MS2.27768.27768.3.0.dta	MS2.27762.27762.3.0.dta	3965.69	MVSHHJLTTGATLINEQW	null	2052	5-4-1-0-0	1913.68	5	48.1292	0.0128125	-2.09845	sp|P00738|HPT_HUMAN/sp|P00739|HPTR_HUMAN	2
MS2.12874.12874.3.1.dta	MS2.12868.12868.3.1.dta	3258.3	THTJISESHPJATF	null	1555.71	8-2-0-0-0	1702.58	10	47.2288	0.0100925	0.76728	sp|P01871|IGHM_HUMAN/sp|P04220|MUCB_HUMAN	1
MS2.3873.3873.2.0.dta	MS2.3867.3867.2.0.dta	2371.95	JNSDISSTR	null	993.46	6-2-0-0-0	1378.48	0	47.1339	0.0118525	3.1784	sp|P01871|IGHM_HUMAN	1
MS2.28210.28210.3.0.dta	MS2.28204.28204.3.0.dta	4679.94	YFTPJKTEDTIFLR	null	1744.89	7-6-2-0-0	2935.04	4	46.9918	0.0106825	2.23003	sp|P02763|A1AG1_HUMAN/sp|P19652|A1AG2_HUMAN	1
MS2.3171.3171.2.0.dta	MS2.3165.3165.2.0.dta	2710.04	NEEYJK	null	796.347	5-4-1-0-0	1913.68	4	46.9709	0.0120525	1.91539	sp|P02763|A1AG1_HUMAN/sp|P19652|A1AG2_HUMAN	1
MS2.19228.19228.3.0.dta	MS2.19223.19223.3.0.dta	2962.18	NLFLJH	null	757.399	5-4-2-0-0	2204.77	4	46.3139	0.00617253	0.31456	sp|P00738|HPT_HUMAN/sp|P00739|HPTR_HUMAN	1
MS2.29792.29792.3.0.dta	MS2.29786.29786.3.0.dta	4622.93	YFTPJKTEDTIFLR	null	1744.89	7-5-2-0-1	2878.02	4	46.7184	0.0213225	1.93806	sp|P02763|A1AG1_HUMAN/sp|P19652|A1AG2_HUMAN	3
MS2.3888.3888.3.0.dta	MS2.3881.3881.3.0.dta	2778.1	JNSDISSTR	null	993.46	6-4-0-0-0	1784.63	0	46.6478	0.00890253	0.85407	sp|P01871|IGHM_HUMAN	1
MS2.29248.29248.3.1.dta	MS2.29240.29240.3.1.dta	4621.92	MVSHHJLTTGATLINEQW	null	2052	6-5-2-0-0	2569.9	5	46.4292	0.0158725	0.40995	sp|P00738|HPT_HUMAN/sp|P00739|HPTR_HUMAN	3
MS2.17581.17581.3.0.dta	MS2.17575.17575.3.0.dta	4200.7	QQJASSMCVPDQDTAIR	8,C(Carbamidomethyl[C]);	1920.85	6-5-0-0-2	2279.83	2	46.4143	0.0213325	2.72174	sp|P01871|IGHM_HUMAN	2
MS2.24635.24635.5.0.dta	MS2.24630.24630.5.0.dta	4550.91	LAGKPTHVJVSVVMAEVDGTC	14,M(Oxidation[M]);21,C(Carbamidomethyl[C]);	2200.07	5-4-2-0-1	2350.83	8	46.294	0.00349253	1.0021	sp|P01876|IGHA1_HUMAN	3
MS2.5588.5588.3.0.dta	MS2.5582.5582.3.0.dta	3547.44	YKJNSDISSTR	null	1284.62	5-5-1-0-1	2262.81	2	46.1837	0.0119125	1.86691	sp|P01871|IGHM_HUMAN	3
MS2.33202.33202.4.0.dta	MS2.33196.33196.4.0.dta	4792.14	SLGNVJFTVSAEALESQELCGTEVPSVPEHGR	20,C(Carbamidomethyl[C]);	3413.63	6-2-0-0-0	1378.48	5	46.0016	0.0388825	1.45083	sp|P01023|A2MG_HUMAN	2
MS2.28409.28409.3.1.dta	MS2.28402.28402.3.1.dta	4477.89	YFTPJKTEDTIFLR	null	1744.89	7-5-1-0-2	2732.98	4	45.7316	0.0186525	2.87018	sp|P02763|A1AG1_HUMAN/sp|P19652|A1AG2_HUMAN	1
MS2.26653.26653.3.0.dta	MS2.26649.26649.3.0.dta	3658.57	YFTPJKTEDTIFLR	null	1744.89	5-4-1-0-0	1913.68	4	45.4963	0.00222253	0.51451	sp|P02763|A1AG1_HUMAN/sp|P19652|A1AG2_HUMAN	1
MS2.31705.31705.3.0.dta	MS2.31699.31699.3.0.dta	4551.95	LAGKPTHVJVSVVMAEVDGTC	21,C(Carbamidomethyl[C]);	2184.08	6-4-1-0-2	2367.85	8	45.3422	0.0260525	2.74102	sp|P01876|IGHA1_HUMAN	2
MS2.3146.3146.3.1.dta	MS2.3139.3139.3.1.dta	3157.23	RNEEYJK	null	952.448	5-4-2-0-0	2204.77	5	45.3267	0.0133325	0.52984	sp|P02763|A1AG1_HUMAN/sp|P19652|A1AG2_HUMAN	3
MS2.4206.4206.3.1.dta	MS2.4200.4200.3.1.dta	3366.26	NEEYJK	null	796.347	6-5-2-0-0	2569.9	4	45.0608	0.00893253	0.7368	sp|P02763|A1AG1_HUMAN/sp|P19652|A1AG2_HUMAN	1
MS2.36423.36423.4.0.dta	MS2.36417.36417.4.0.dta	4630.07	SLGNVJFTVSAEALESQELCGTEVPSVPEHGR	20,C(Carbamidomethyl[C]);	3413.63	5-2-0-0-0	1216.42	5	44.8405	0.0225125	6.36821	sp|P01023|A2MG_HUMAN	2
MS2.13936.13936.2.0.dta	MS2.13930.13930.2.0.dta	2764.12	EEQFJSTFR	null	1157.52	4-4-0-0-1	1606.59	4	44.5511	0.00723253	0.90919	sp|P01859|IGHG2_HUMAN	3
MS2.2725.2725.3.0.dta	MS2.2720.2720.3.0.dta	2710.04	NEEYJK	null	796.347	5-4-1-0-0	1913.68	4	44.546	0.0109425	0.74393	sp|P02763|A1AG1_HUMAN/sp|P19652|A1AG2_HUMAN	1
MS2.35202.35202.4.2.dta	MS2.35197.35197.4.2.dta	4630.08	SLGNVJFTVSAEALESQELCGTEVPSVPEHGR	20,C(Carbamidomethyl[C]);	3413.63	5-2-0-0-0	1216.42	5	44.5346	0.0259525	5.59531	sp|P01023|A2MG_HUMAN	2
MS2.36170.36170.4.1.dta	MS2.36164.36164.4.1.dta	4630.07	SLGNVJFTVSAEALESQELCGTEVPSVPEHGR	20,C(Carbamidomethyl[C]);	3413.63	5-2-0-0-0	1216.42	5	44.5314	0.0182525	5.03979	sp|P01023|A2MG_HUMAN	2
MS2.35488.35488.4.0.dta	MS2.35482.35482.4.0.dta	4630.07	SLGNVJFTVSAEALESQELCGTEVPSVPEHGR	20,C(Carbamidomethyl[C]);	3413.63	5-2-0-0-0	1216.42	5	44.4751	0.0157425	2.61795	sp|P01023|A2MG_HUMAN	2
MS2.12017.12017.2.0.dta	MS2.12011.12011.2.0.dta	2930.29	TPLTAJITK	null	958.557	5-5-0-0-1	1971.72	5	44.3583	0.00974253	1.48791	sp|P01877|IGHA2_HUMAN	1
MS2.4045.4045.3.2.dta	MS2.4039.4039.3.2.dta	3805.43	NEEYJK	null	796.347	8-7-1-0-0	3009.07	4	44.2572	0.00760253	1.0528	sp|P02763|A1AG1_HUMAN/sp|P19652|A1AG2_HUMAN	1
MS2.25318.25318.3.1.dta	MS2.25309.25309.3.1.dta	3669.52	SIJTTNVMGTSLTVR	null	1593.83	6-4-1-0-0	2075.73	2	44.1365	-0.0322975	-7.27145	sp|P01023|A2MG_HUMAN	1
MS2.33387.33387.4.0.dta	MS2.33381.33381.4.0.dta	4885.2	MVSHHJLTTGATLINEQWLLTTAK	null	2679.39	5-4-1-0-2	2205.79	5	44.04	0.0139025	-0.10049	sp|P00738|HPT_HUMAN/sp|P00739|HPTR_HUMAN	2
MS2.5600.5600.3.0.dta	MS2.5594.5594.3.0.dta	2979.23	YKJNSDISSTR	null	1284.62	4-3-1-0-1	1694.6	2	44.0041	0.00889253	-0.19343	sp|P01871|IGHM_HUMAN	3
MS2.6217.6217.3.0.dta	MS2.6209.6209.3.0.dta	2979.23	YKJNSDISSTR	null	1284.62	4-3-1-0-1	1694.6	2	43.9465	0.0104525	3.04622	sp|P01871|IGHM_HUMAN	3
MS2.33740.33740.4.2.dta	MS2.33734.33734.4.2.dta	5165.29	SLGNVJFTVSAEALESQELCGTEVPSVPEHGR	20,C(Carbamidomethyl[C]);	3413.63	4-4-1-0-0	1751.62	5	43.6383	0.0367525	4.87553	sp|P01023|A2MG_HUMAN	2
MS2.25473.25473.3.1.dta	MS2.25466.25466.3.1.dta	4107.73	GLTFQQJASSMCVPDQDTAIR	12,C(Carbamidomethyl[C]);	2339.08	5-4-0-0-1	1768.64	6	43.5714	0.0173125	4.8866	sp|P01871|IGHM_HUMAN	2
MS2.34114.34114.4.1.dta	MS2.34107.34107.4.1.dta	4630.08	SLGNVJFTVSAEALESQELCGTEVPSVPEHGR	20,C(Carbamidomethyl[C]);	3413.63	5-2-0-0-0	1216.42	5	43.2885	0.0334025	5.78074	sp|P01023|A2MG_HUMAN	2
MS2.26755.26755.4.3.dta	MS2.26750.26750.4.3.dta	4456.85	GLTFQQJASSMCVPDQDTAIR	12,C(Carbamidomethyl[C]);	2339.08	5-5-0-0-2	2117.78	6	43.0245	-0.00243747	2.3305	sp|P01871|IGHM_HUMAN	2
MS2.31103.31103.4.1.dta	MS2.31097.31097.4.1.dta	4748.1	VVLHPJYSQVDIGLIK	null	1795.01	8-6-0-0-3	2953.07	5	42.0404	0.0118625	1.45887	sp|P00738|HPT_HUMAN	3
MS2.13217.13217.3.1.dta	MS2.13211.13211.3.1.dta	3018.29	TPLTAJITK	null	958.557	5-4-1-0-1	2059.73	5	41.6266	-0.00170747	0.36886	sp|P01877|IGHA2_HUMAN	3
MS2.3875.3875.3.0.dta	MS2.3868.3868.3.0.dta	2710.03	NEEYJK	null	796.347	5-4-1-0-0	1913.68	4	41.614	0.00728253	1.135	sp|P02763|A1AG1_HUMAN/sp|P19652|A1AG2_HUMAN	1
MS2.24635.24635.5.1.dta	MS2.24630.24630.5.1.dta	4552.91	LAGKPTHVJVSVVMAEVDGTC	14,M(Oxidation[M]);21,C(Carbamidomethyl[C]);	2200.07	5-4-0-0-5	2352.87	8	40.7956	-0.0306075	-4.87212	sp|P01876|IGHA1_HUMAN	3
MS2.30260.30260.3.0.dta	MS2.30255.30255.3.0.dta	4485.89	CANLVPVPITJATLDR	1,C(Carbamidomethyl[C]);	1753.93	7-5-2-0-0	2731.96	10	41.3453	0.00620253	-2.16977	sp|P19652|A1AG2_HUMAN	1
MS2.6658.6658.3.0.dta	MS2.6653.6653.3.0.dta	3547.45	YKJNSDISSTR	null	1284.62	5-5-1-0-1	2262.81	2	41.209	0.0130725	2.97934	sp|P01871|IGHM_HUMAN	3
MS2.8214.8214.4.1.dta	MS2.8208.8208.4.1.dta	3473.39	MVSHHJLTTGAT	null	1268.61	5-4-2-0-0	2204.77	5	41.1926	0.00852253	1.9419	sp|P00738|HPT_HUMAN/sp|P00739|HPTR_HUMAN	3
MS2.6213.6213.3.0.dta	MS2.6208.6208.3.0.dta	3547.44	YKJNSDISSTR	null	1284.62	5-5-1-0-1	2262.81	2	40.7277	0.0124125	3.14744	sp|P01871|IGHM_HUMAN	3
MS2.27142.27142.4.1.dta	MS2.27136.27136.4.1.dta	3613.6	LVPVPITJATLDR	null	1408.82	5-4-2-0-0	2204.77	7	40.6786	0.00709253	0.16631	sp|P19652|A1AG2_HUMAN	3
MS2.34940.34940.4.0.dta	MS2.34932.34932.4.0.dta	4630.06	SLGNVJFTVSAEALESQELCGTEVPSVPEHGR	20,C(Carbamidomethyl[C]);	3413.63	5-2-0-0-0	1216.42	5	40.3474	0.0125225	6.25668	sp|P01023|A2MG_HUMAN	1
MS2.24078.24078.3.0.dta	MS2.24072.24072.3.0.dta	3175.39	SIJTTNVMGTSLTVR	null	1593.83	6-3-0-0-0	1581.56	2	40.3292	0.00938253	2.99902	sp|P01023|A2MG_HUMAN	1
MS2.27856.27856.4.1.dta	MS2.27851.27851.4.1.dta	4669.01	LVPVPITJATLDR	null	1408.82	9-6-1-0-2	3260.16	7	40.2871	0.0334125	3.89552	sp|P19652|A1AG2_HUMAN	3
MS2.29757.29757.4.0.dta	MS2.29750.29750.4.0.dta	4605.92	YFTPJKTEDTIFLR	null	1744.89	6-5-3-0-0	2861	4	40.2622	0.0249425	0.61246	sp|P02763|A1AG1_HUMAN/sp|P19652|A1AG2_HUMAN	3
MS2.8540.8540.3.0.dta	MS2.8534.8534.3.0.dta	3344.37	YKJNSDISSTR	null	1284.62	5-4-1-0-1	2059.73	2	39.6748	0.0137325	2.46521	sp|P01871|IGHM_HUMAN	3
MS2.8614.8614.3.0.dta	MS2.8608.8608.3.0.dta	3540.36	EEQYJSTYR	null	1189.51	5-4-2-0-1	2350.83	4	39.3087	0.0134425	1.6029	sp|P01857|IGHG1_HUMAN	3
MS2.25510.25510.3.0.dta	MS2.25505.25505.3.0.dta	3687.64	LVPVPITJATLDR	null	1408.82	6-5-1-0-0	2278.81	7	39.2473	0.0123525	3.49453	sp|P19652|A1AG2_HUMAN	1
MS2.34186.34186.3.0.dta	MS2.34180.34180.3.0.dta	4641.05	LVPVPITJATLDQITGK	null	1780.02	6-5-3-0-0	2861	7	39.2444	0.0272725	0.982	sp|P02763|A1AG1_HUMAN	3
MS2.12912.12912.3.0.dta	MS2.12903.12903.3.0.dta	2707.14	STGKPTLYJVS	null	1166.61	7-2-0-0-0	1540.53	8	39.0671	0.00882253	1.59969	sp|P01871|IGHM_HUMAN/sp|P04220|MUCB_HUMAN	3
MS2.8804.8804.3.0.dta	MS2.8798.8798.3.0.dta	3344.37	YKJNSDISSTR	null	1284.62	5-4-1-0-1	2059.73	2	38.9749	0.0133425	2.80305	sp|P01871|IGHM_HUMAN	3
MS2.3453.3453.3.0.dta	MS2.3448.3448.3.0.dta	3420.35	EJGTISR	null	776.39	7-6-1-0-0	2643.94	1	38.949	0.0152125	2.35944	sp|P02763|A1AG1_HUMAN	3
MS2.29433.29433.3.2.dta	MS2.29429.29429.3.2.dta	4348.92	VVLHPJYSQVDIGLIK	null	1795.01	5-5-2-0-1	2553.91	5	38.7674	0.00130253	-1.12602	sp|P00738|HPT_HUMAN	1
MS2.9025.9025.3.0.dta	MS2.9020.9020.3.0.dta	3344.37	YKJNSDISSTR	null	1284.62	5-4-1-0-1	2059.73	2	38.7315	0.0140925	3.08053	sp|P01871|IGHM_HUMAN	3
MS2.24051.24051.4.2.dta	MS2.24045.24045.4.2.dta	4533.9	FTPJKTEDTIFLR	null	1581.83	8-6-1-0-1	2952.05	3	38.6824	0.0250225	3.89232	sp|P02763|A1AG1_HUMAN/sp|P19652|A1AG2_HUMAN	3
MS2.4503.4503.3.1.dta	MS2.4497.4497.3.1.dta	3001.19	YKJNSDIS	null	940.437	5-4-0-0-3	2060.76	2	37.6303	-0.00499747	-2.66106	sp|P01871|IGHM_HUMAN	1
MS2.33800.33800.5.0.dta	MS2.33796.33796.5.0.dta	4962.2	SLGNVJFTVSAEALESQELCGTEVPSVPEHGR	20,C(Carbamidomethyl[C]);	3413.63	4-3-1-0-0	1548.54	5	38.3137	0.0259625	-1.82494	sp|P01023|A2MG_HUMAN	2
MS2.27768.27768.3.1.dta	MS2.27762.27762.3.1.dta	3966.69	MVSHHJLTTGATLINEQW	null	2052	5-4-0-0-2	1914.7	5	37.362	-0.00697747	-6.13321	sp|P00738|HPT_HUMAN/sp|P00739|HPTR_HUMAN	1
MS2.29866.29866.3.0.dta	MS2.29860.29860.3.0.dta	4273.78	MVSHHJLTTGATLINEQW	null	2052	6-4-1-0-1	2221.79	5	38.2255	-0.00333747	-0.26216	sp|P00738|HPT_HUMAN/sp|P00739|HPTR_HUMAN	3
MS2.6152.6152.3.0.dta	MS2.6147.6147.3.0.dta	3010.21	MVSHHJLTTG	null	1096.52	5-4-1-0-0	1913.68	5	36.7016	0.0111025	-0.50182	sp|P00738|HPT_HUMAN/sp|P00739|HPTR_HUMAN	3
MS2.27956.27956.3.0.dta	MS2.27950.27950.3.0.dta	4678.89	YFTPJKTEDTIFLR	null	1744.89	5-4-3-0-3	2934.04	4	37.9883	-0.0403775	-5.18962	sp|P02763|A1AG1_HUMAN/sp|P19652|A1AG2_HUMAN	1
MS2.5811.5811.3.0.dta	MS2.5804.5804.3.0.dta	2979.23	YKJNSDISSTR	null	1284.62	4-3-1-0-1	1694.6	2	37.9162	0.0113925	2.82362	sp|P01871|IGHM_HUMAN	3
MS2.3109.3109.3.0.dta	MS2.3103.3103.3.0.dta	2418.94	NEEYJK	null	796.347	5-4-0-0-0	1622.58	4	37.4757	0.00800253	1.50637	sp|P02763|A1AG1_HUMAN/sp|P19652|A1AG2_HUMAN	3
MS2.7609.7609.3.0.dta	MS2.7602.7602.3.0.dta	3015.18	EEQYJSTYR	null	1189.51	5-5-0-0-0	1825.66	4	36.296	0.0113525	4.79474	sp|P01857|IGHG1_HUMAN	3
MS2.4046.4046.3.0.dta	MS2.4040.4040.3.0.dta	3674.39	NEEYJK	null	796.347	7-5-2-0-1	2878.02	4	37.3427	0.0250625	3.74196	sp|P02763|A1AG1_HUMAN/sp|P19652|A1AG2_HUMAN	1
MS2.37487.37487.4.1.dta	MS2.37478.37478.4.1.dta	4792.13	SLGNVJFTVSAEALESQELCGTEVPSVPEHGR	20,C(Carbamidomethyl[C]);	3413.63	6-2-0-0-0	1378.48	5	36.5887	0.0234825	6.80985	sp|P01023|A2MG_HUMAN	3
MS2.36461.36461.4.1.dta	MS2.36455.36455.4.1.dta	4792.08	SLGNVJFTVSAEALESQELCGTEVPSVPEHGR	20,C(Carbamidomethyl[C]);	3413.63	6-2-0-0-0	1378.48	5	36.5527	-0.0214875	-4.3173	sp|P01023|A2MG_HUMAN	2
MS2.27656.27656.4.5.dta	MS2.27650.27650.4.5.dta	4739.99	LAGKPTHVJVSVVMAEVDGTC	21,C(Carbamidomethyl[C]);	2184.08	5-5-0-0-5	2555.95	8	36.5102	-0.0372975	-1.69116	sp|P01876|IGHA1_HUMAN	1
MS2.34368.34368.4.1.dta	MS2.34362.34362.4.1.dta	4630.09	SLGNVJFTVSAEALESQELCGTEVPSVPEHGR	20,C(Carbamidomethyl[C]);	3413.63	5-2-0-0-0	1216.42	5	36.4231	0.0411925	4.44652	sp|P01023|A2MG_HUMAN	2
MS2.17618.17618.4.0.dta	MS2.17612.17612.4.0.dta	4200.71	QQJASSMCVPDQDTAIR	8,C(Carbamidomethyl[C]);	1920.85	6-5-0-0-2	2279.83	2	36.1932	0.0232225	4.39379	sp|P01871|IGHM_HUMAN	2
MS2.32243.32243.5.0.dta	MS2.32236.32236.5.0.dta	4593.09	MVSHHJLTTGATLINEQWLLTTAK	null	2679.39	5-4-1-0-0	1913.68	5	36.067	0.0209425	-3.51963	sp|P00738|HPT_HUMAN/sp|P00739|HPTR_HUMAN	2
MS2.25633.25633.3.0.dta	MS2.25627.25627.3.0.dta	3322.49	LVPVPITJATLDR	null	1408.82	5-4-1-0-0	1913.68	7	35.9462	-0.00230747	0.39472	sp|P19652|A1AG2_HUMAN	3
MS2.12677.12677.3.1.dta	MS2.12669.12669.3.1.dta	3344.36	YKJNSDISSTR	null	1284.62	5-4-1-0-1	2059.73	2	35.883	0.00961253	2.26917	sp|P01871|IGHM_HUMAN	3
MS2.3996.3996.3.1.dta	MS2.3990.3990.3.1.dta	3514.33	NEEYJK	null	796.347	8-7-0-0-0	2717.98	4	35.8234	0.00697253	0.93164	sp|P02763|A1AG1_HUMAN/sp|P19652|A1AG2_HUMAN	1
MS2.5058.5058.3.0.dta	MS2.5053.5053.3.0.dta	3141.28	YKJNSDISSTR	null	1284.62	5-3-1-0-1	1856.66	2	35.6609	0.00611253	-0.58147	sp|P01871|IGHM_HUMAN	3
MS2.25863.25863.4.1.dta	MS2.25856.25856.4.1.dta	4243.83	LAGKPTHVJVSVVMAEVDGTC	21,C(Carbamidomethyl[C]);	2184.08	5-4-1-0-1	2059.73	8	35.5509	0.0194025	4.68119	sp|P01876|IGHA1_HUMAN	3
MS2.35885.35885.4.0.dta	MS2.35879.35879.4.0.dta	4630.07	SLGNVJFTVSAEALESQELCGTEVPSVPEHGR	20,C(Carbamidomethyl[C]);	3413.63	5-2-0-0-0	1216.42	5	35.4828	0.0148625	2.03049	sp|P01023|A2MG_HUMAN	2
MS2.3690.3690.3.0.dta	MS2.3683.3683.3.0.dta	3221.23	NEEYJK	null	796.347	6-5-1-0-1	2424.87	4	35.4529	0.0116825	0.97501	sp|P02763|A1AG1_HUMAN/sp|P19652|A1AG2_HUMAN	1
MS2.36942.36942.5.0.dta	MS2.36936.36936.5.0.dta	5327.32	SLGNVJFTVSAEALESQELCGTEVPSVPEHGR	20,C(Carbamidomethyl[C]);	3413.63	5-4-1-0-0	1913.68	5	35.4066	0.0134825	6.14359	sp|P01023|A2MG_HUMAN	3
MS2.4403.4403.3.0.dta	MS2.4398.4398.3.0.dta	3012.24	YKJNSDISSTR	null	1284.62	6-3-0-0-1	1727.61	2	34.916	0.0127725	-0.73838	sp|P01871|IGHM_HUMAN	3
MS2.3379.3379.3.0.dta	MS2.3373.3373.3.0.dta	3075.17	NEEYJK	null	796.347	6-5-1-0-0	2278.81	4	34.8571	0.00990253	1.14087	sp|P02763|A1AG1_HUMAN/sp|P19652|A1AG2_HUMAN	1
MS2.3356.3356.3.0.dta	MS2.3349.3349.3.0.dta	2418.94	NEEYJK	null	796.347	5-4-0-0-0	1622.58	4	34.8146	0.00891253	0.69551	sp|P02763|A1AG1_HUMAN/sp|P19652|A1AG2_HUMAN	3
MS2.36878.36878.4.0.dta	MS2.36872.36872.4.0.dta	4630.07	SLGNVJFTVSAEALESQELCGTEVPSVPEHGR	20,C(Carbamidomethyl[C]);	3413.63	5-2-0-0-0	1216.42	5	34.7691	0.0205525	5.46628	sp|P01023|A2MG_HUMAN	2
MS2.31994.31994.3.2.dta	MS2.31990.31990.3.2.dta	4170.8	FYFTPJKTEDTIFLR	null	1891.96	6-5-1-0-0	2278.81	5	34.5935	0.0318525	2.07314	sp|P02763|A1AG1_HUMAN/sp|P19652|A1AG2_HUMAN	3
MS2.3713.3713.3.0.dta	MS2.3707.3707.3.0.dta	3857.5	EJGTISR	null	776.39	7-6-2-0-1	3081.09	1	34.5714	0.0128725	2.27715	sp|P02763|A1AG1_HUMAN	3
MS2.34382.34382.4.1.dta	MS2.34376.34376.4.1.dta	4208.86	MVSHHJLTTGATLINEQWLL	null	2278.16	6-4-0-0-1	1930.69	5	34.4234	0.00761253	-2.38323	sp|P00738|HPT_HUMAN/sp|P00739|HPTR_HUMAN	2
MS2.31978.31978.3.0.dta	MS2.31973.31973.3.0.dta	5038.15	VVLHPJYSQVDIGLIK	null	1795.01	8-6-2-0-1	3243.15	5	34.4228	-0.0122675	-1.95116	sp|P00738|HPT_HUMAN	1
MS2.5323.5323.4.1.dta	MS2.5319.5319.4.1.dta	3547.45	YKJNSDISSTR	null	1284.62	5-5-1-0-1	2262.81	2	34.1719	0.0130125	3.00156	sp|P01871|IGHM_HUMAN	3
MS2.2960.2960.2.0.dta	MS2.2954.2954.2.0.dta	2710.04	NEEYJK	null	796.347	5-4-1-0-0	1913.68	4	34.1034	0.0136925	4.40509	sp|P02763|A1AG1_HUMAN/sp|P19652|A1AG2_HUMAN	1
MS2.24321.24321.3.0.dta	MS2.24315.24315.3.0.dta	3175.39	SIJTTNVMGTSLTVR	null	1593.83	6-3-0-0-0	1581.56	2	33.9396	0.0111825	3.05953	sp|P01023|A2MG_HUMAN	1
MS2.3392.3392.3.2.dta	MS2.3386.3386.3.2.dta	2727.06	NEEYJK	null	796.347	6-4-0-0-1	1930.69	4	33.7526	0.0233225	4.35211	sp|P02763|A1AG1_HUMAN/sp|P19652|A1AG2_HUMAN	1
MS2.35899.35899.5.1.dta	MS2.35892.35892.5.1.dta	5328.33	SLGNVJFTVSAEALESQELCGTEVPSVPEHGR	20,C(Carbamidomethyl[C]);	3413.63	5-4-0-0-2	1914.7	5	33.6661	0.00779253	4.78142	sp|P01023|A2MG_HUMAN	3
MS2.33713.33713.6.1.dta	MS2.33708.33708.6.1.dta	5327.26	SLGNVJFTVSAEALESQELCGTEVPSVPEHGR	20,C(Carbamidomethyl[C]);	3413.63	5-4-1-0-0	1913.68	5	33.6336	-0.0403975	-9.96093	sp|P01023|A2MG_HUMAN	2
MS2.13590.13590.3.0.dta	MS2.13583.13583.3.0.dta	3344.36	YKJNSDISSTR	null	1284.62	5-4-1-0-1	2059.73	2	33.5015	0.00857253	0.78097	sp|P01871|IGHM_HUMAN	3
MS2.28099.28099.3.0.dta	MS2.28094.28094.3.0.dta	4460.87	YFTPJKTEDTIFLR	null	1744.89	6-5-2-0-1	2715.96	4	33.4569	0.0151425	3.04902	sp|P02763|A1AG1_HUMAN/sp|P19652|A1AG2_HUMAN	3
MS2.4083.4083.3.0.dta	MS2.4076.4076.3.0.dta	4148.6	EJGTISR	null	776.39	7-6-3-0-1	3372.19	1	33.4436	0.0234325	2.35245	sp|P02763|A1AG1_HUMAN	3
MS2.28137.28137.3.0.dta	MS2.28130.28130.3.0.dta	3965.68	MVSHHJLTTGATLINEQW	null	2052	5-4-1-0-0	1913.68	5	33.4111	0.00730253	3.62567	sp|P00738|HPT_HUMAN/sp|P00739|HPTR_HUMAN	3
MS2.37304.37304.4.0.dta	MS2.37298.37298.4.0.dta	4630.07	SLGNVJFTVSAEALESQELCGTEVPSVPEHGR	20,C(Carbamidomethyl[C]);	3413.63	5-2-0-0-0	1216.42	5	33.2677	0.0205225	3.85924	sp|P01023|A2MG_HUMAN	2
MS2.12450.12450.3.1.dta	MS2.12444.12444.3.1.dta	3344.36	YKJNSDISSTR	null	1284.62	5-4-1-0-1	2059.73	2	32.8141	0.00905253	-0.14149	sp|P01871|IGHM_HUMAN	3
MS2.26155.26155.3.0.dta	MS2.26150.26150.3.0.dta	3483.51	SIJTTNVMGTSLTVR	null	1593.83	7-3-0-0-1	1889.67	2	32.7552	0.0189625	3.27847	sp|P01023|A2MG_HUMAN	3
MS2.2509.2509.3.0.dta	MS2.2502.2502.3.0.dta	3001.13	NEEYJK	null	796.347	5-4-2-0-0	2204.77	4	32.5024	0.0135825	-0.01511	sp|P02763|A1AG1_HUMAN/sp|P19652|A1AG2_HUMAN	3
MS2.28535.28535.3.1.dta	MS2.28531.28531.3.1.dta	4637.92	MVSHHJLTTGATLINEQW	1,M(Oxidation[M]);	2067.99	6-5-2-0-0	2569.9	5	32.5008	0.0284525	4.88154	sp|P00738|HPT_HUMAN/sp|P00739|HPTR_HUMAN	3
MS2.33648.33648.4.0.dta	MS2.33641.33641.4.0.dta	5344.37	SLGNVJFTVSAEALESQELCGTEVPSVPEHGR	20,C(Carbamidomethyl[C]);	3413.63	6-4-0-0-1	1930.69	5	32.4526	0.0449425	5.24839	sp|P01023|A2MG_HUMAN	2
MS2.26418.26418.3.0.dta	MS2.26414.26414.3.0.dta	4141.8	LVPVPITJATLDR	null	1408.82	7-5-1-0-2	2732.98	7	32.4446	0.0112425	1.19975	sp|P19652|A1AG2_HUMAN	3
MS2.37708.37708.4.0.dta	MS2.37702.37702.4.0.dta	4630.07	SLGNVJFTVSAEALESQELCGTEVPSVPEHGR	20,C(Carbamidomethyl[C]);	3413.63	5-2-0-0-0	1216.42	5	32.2244	0.0175825	4.12145	sp|P01023|A2MG_HUMAN	2
MS2.24235.24235.3.0.dta	MS2.24228.24228.3.0.dta	2810.25	SIJTTNVMGTSLTVR	null	1593.83	5-2-0-0-0	1216.42	2	32.0513	0.00430253	-0.43804	sp|P01023|A2MG_HUMAN	2
MS2.28247.28247.3.0.dta	MS2.28241.28241.3.0.dta	4696.95	YFTPJKTEDTIFLR	null	1744.89	8-6-1-0-1	2952.05	4	31.8796	0.00592253	2.28071	sp|P02763|A1AG1_HUMAN/sp|P19652|A1AG2_HUMAN	3
MS2.6437.6437.3.0.dta	MS2.6431.6431.3.0.dta	3547.44	YKJNSDISSTR	null	1284.62	5-5-1-0-1	2262.81	2	31.8378	0.0118625	1.80788	sp|P01871|IGHM_HUMAN	3
MS2.12104.12104.3.0.dta	MS2.12099.12099.3.0.dta	2768.23	TPLTAJITK	null	958.557	4-5-0-0-1	1809.67	5	31.5244	0.00867253	0.47377	sp|P01877|IGHA2_HUMAN	3
MS2.34037.34037.5.0.dta	MS2.34030.34030.5.0.dta	5286.31	SLGNVJFTVSAEALESQELCGTEVPSVPEHGR	20,C(Carbamidomethyl[C]);	3413.63	6-3-1-0-0	1872.65	5	31.5142	0.0335125	1.01663	sp|P01023|A2MG_HUMAN	3
MS2.35850.35850.4.0.dta	MS2.35844.35844.4.0.dta	5124.27	SLGNVJFTVSAEALESQELCGTEVPSVPEHGR	20,C(Carbamidomethyl[C]);	3413.63	5-3-1-0-0	1710.6	5	31.4377	0.0432525	11.5742	sp|P01023|A2MG_HUMAN	3
MS2.33387.33387.4.1.dta	MS2.33381.33381.4.1.dta	4884.19	MVSHHJLTTGATLINEQWLLTTAK	null	2679.39	5-4-2-0-0	2204.77	5	31.1934	0.0299425	0.61539	sp|P00738|HPT_HUMAN/sp|P00739|HPTR_HUMAN	2
MS2.8199.8199.4.0.dta	MS2.8194.8194.4.0.dta	3372.34	MVSHHJLTTGA	null	1167.56	5-4-2-0-0	2204.77	5	31.1877	0.00569253	0.46837	sp|P00738|HPT_HUMAN/sp|P00739|HPTR_HUMAN	3
MS2.30991.30991.3.0.dta	MS2.30985.30985.3.0.dta	2922.22	VSJQTLSLF	null	1008.54	5-4-1-0-0	1913.68	2	31.0999	0.0101625	0.9202	sp|P01023|A2MG_HUMAN	2
MS2.31020.31020.3.2.dta	MS2.31012.31012.3.2.dta	4641.03	VVLHPJYSQVDIGLIK	null	1795.01	5-5-2-0-3	2846.03	5	30.9845	-0.00735747	-2.51039	sp|P00738|HPT_HUMAN	3
MS2.14708.14708.3.0.dta	MS2.14704.14704.3.0.dta	2602.06	EEQFJSTFR	null	1157.52	3-4-0-0-1	1444.53	4	30.7572	0.00595253	-0.69512	sp|P01859|IGHG2_HUMAN	3
MS2.2510.2510.3.0.dta	MS2.2503.2503.3.0.dta	2710.04	NEEYJK	null	796.347	5-4-1-0-0	1913.68	4	30.5332	0.0118025	1.12777	sp|P02763|A1AG1_HUMAN/sp|P19652|A1AG2_HUMAN	3
MS2.31629.31629.4.1.dta	MS2.31624.31624.4.1.dta	5021.18	VVLHPJYSQVDIGLIK	null	1795.01	7-6-3-0-0	3226.13	5	30.5063	0.0329625	2.64391	sp|P00738|HPT_HUMAN	3
MS2.17619.17619.4.1.dta	MS2.17614.17614.4.1.dta	4183.68	QQJASSMCVPDQDTAIR	8,C(Carbamidomethyl[C]);	1920.85	5-5-1-0-1	2262.81	2	30.069	0.0153825	3.90814	sp|P01871|IGHM_HUMAN	2
MS2.36941.36941.4.1.dta	MS2.36935.36935.4.1.dta	4758.16	SLGNVJFTVSAEALESQELCGTEVPSVPEHGRK	20,C(Carbamidomethyl[C]);	3541.72	5-2-0-0-0	1216.42	5	30.0087	0.0182625	5.81097	sp|P01023|A2MG_HUMAN	2
MS2.34149.34149.5.0.dta	MS2.34143.34143.5.0.dta	5327.31	SLGNVJFTVSAEALESQELCGTEVPSVPEHGR	20,C(Carbamidomethyl[C]);	3413.63	5-4-1-0-0	1913.68	5	29.9382	0.00715253	1.40723	sp|P01023|A2MG_HUMAN	2
MS2.4011.4011.3.0.dta	MS2.4004.4004.3.0.dta	3637.4	EJGTISR	null	776.39	6-5-3-0-0	2861	1	29.7546	0.0122525	1.53132	sp|P02763|A1AG1_HUMAN	3
MS2.3170.3170.3.1.dta	MS2.3164.3164.3.1.dta	2727.06	NEEYJK	null	796.347	6-4-0-0-1	1930.69	4	29.3429	0.0214025	4.02569	sp|P02763|A1AG1_HUMAN/sp|P19652|A1AG2_HUMAN	1
MS2.30791.30791.4.0.dta	MS2.30785.30785.4.0.dta	4930.05	MVSHHJLTTGATLINEQW	null	2052	7-5-2-0-1	2878.02	5	29.3241	0.0364825	1.36589	sp|P00738|HPT_HUMAN/sp|P00739|HPTR_HUMAN	1
MS2.31169.31169.4.1.dta	MS2.31165.31165.4.1.dta	4884.19	MVSHHJLTTGATLINEQWLLTTAK	null	2679.39	5-4-2-0-0	2204.77	5	28.8042	0.0281825	2.16454	sp|P00738|HPT_HUMAN/sp|P00739|HPTR_HUMAN	2
MS2.32106.32106.3.0.dta	MS2.32099.32099.3.0.dta	4535.94	LAGKPTHVJVSVVMAEVDGTC	21,C(Carbamidomethyl[C]);	2184.08	5-4-1-0-3	2351.85	8	28.9744	0.00752253	-2.64477	sp|P01876|IGHA1_HUMAN	3
MS2.7586.7586.3.0.dta	MS2.7579.7579.3.0.dta	2958.16	EEQYJSTYR	null	1189.51	5-4-0-0-1	1768.64	4	28.2603	0.0107725	2.17652	sp|P01857|IGHG1_HUMAN	3
MS2.12935.12935.3.0.dta	MS2.12930.12930.3.0.dta	3344.36	YKJNSDISSTR	null	1284.62	5-4-1-0-1	2059.73	2	28.2572	0.00701253	0.16177	sp|P01871|IGHM_HUMAN	3
MS2.4541.4541.3.1.dta	MS2.4534.4534.3.1.dta	3215.32	YKJNSDISSTR	null	1284.62	6-4-0-0-1	1930.69	2	27.5127	0.00859253	2.30396	sp|P01871|IGHM_HUMAN	1
MS2.7734.7734.2.0.dta	MS2.7726.7726.2.0.dta	2488	EEQYJSTYR	null	1189.51	3-4-0-0-0	1298.48	4	27.3834	0.00822253	4.07792	sp|P01857|IGHG1_HUMAN	3
MS2.16132.16132.3.1.dta	MS2.16127.16127.3.1.dta	2909.15	EEQFJSTFR	null	1157.52	4-4-1-0-0	1751.62	4	27.1988	0.00808253	-0.03071	sp|P01859|IGHG2_HUMAN	3
MS2.30904.30904.3.0.dta	MS2.30898.30898.3.0.dta	4930.04	MVSHHJLTTGATLINEQW	null	2052	7-5-2-0-1	2878.02	5	26.9468	0.0324125	3.34957	sp|P00738|HPT_HUMAN/sp|P00739|HPTR_HUMAN	3
MS2.2886.2886.3.0.dta	MS2.2880.2880.3.0.dta	3157.23	RNEEYJK	null	952.448	5-4-2-0-0	2204.77	5	26.9171	0.00998253	0.25393	sp|P02763|A1AG1_HUMAN/sp|P19652|A1AG2_HUMAN	3
MS2.3479.3479.2.0.dta	MS2.3474.3474.2.0.dta	3001.14	NEEYJK	null	796.347	5-4-2-0-0	2204.77	4	26.9067	0.0200725	4.72389	sp|P02763|A1AG1_HUMAN/sp|P19652|A1AG2_HUMAN	1
MS2.36495.36495.5.1.dta	MS2.36489.36489.5.1.dta	5328.33	SLGNVJFTVSAEALESQELCGTEVPSVPEHGR	20,C(Carbamidomethyl[C]);	3413.63	5-4-0-0-2	1914.7	5	26.9055	0.00294253	2.7145	sp|P01023|A2MG_HUMAN	2
MS2.26981.26981.3.0.dta	MS2.26970.26970.3.0.dta	4415.85	GLTFQQJASSMCVPDQDTAIR	12,C(Carbamidomethyl[C]);	2339.08	6-4-0-0-2	2076.75	6	26.6796	0.0246525	5.6888	sp|P01871|IGHM_HUMAN	2
MS2.36991.36991.4.0.dta	MS2.36985.36985.4.0.dta	4979.2	SLGNVJFTVSAEALESQELCGTEVPSVPEHGR	20,C(Carbamidomethyl[C]);	3413.63	5-3-0-0-1	1565.56	5	26.5223	0.0156225	4.67876	sp|P01023|A2MG_HUMAN	2
MS2.5773.5773.3.0.dta	MS2.5767.5767.3.0.dta	3198.29	MVSHHJLTTGAT	1,M(Oxidation[M]);	1284.6	5-4-1-0-0	1913.68	5	26.4413	0.0128925	2.86249	sp|P00738|HPT_HUMAN/sp|P00739|HPTR_HUMAN	3
MS2.3799.3799.3.0.dta	MS2.3793.3793.3.0.dta	3092.19	NEEYJK	null	796.347	7-5-0-0-1	2295.82	4	26.4305	0.0184225	4.14666	sp|P02763|A1AG1_HUMAN/sp|P19652|A1AG2_HUMAN	1
MS2.2295.2295.3.0.dta	MS2.2288.2288.3.0.dta	2710.04	NEEYJK	null	796.347	5-4-1-0-0	1913.68	4	26.2565	0.0125325	2.50125	sp|P02763|A1AG1_HUMAN/sp|P19652|A1AG2_HUMAN	3
MS2.24480.24480.3.0.dta	MS2.24473.24473.3.0.dta	3216.41	SIJTTNVMGTSLTVR	null	1593.83	5-4-0-0-0	1622.58	2	26.14	0.00643253	4.30746	sp|P01023|A2MG_HUMAN	3
MS2.17879.17879.3.0.dta	MS2.17873.17873.3.0.dta	3577.43	FYFTPJK	null	916.456	8-6-0-0-1	2660.96	5	26.1079	0.0204725	3.40386	sp|P02763|A1AG1_HUMAN/sp|P19652|A1AG2_HUMAN	1
MS2.4503.4503.3.0.dta	MS2.4497.4497.3.0.dta	3000.18	YKJNSDIS	null	940.437	5-4-1-0-1	2059.73	2	25.2279	0.0127125	2.19352	sp|P01871|IGHM_HUMAN	1
MS2.3554.3554.3.0.dta	MS2.3547.3547.3.0.dta	3711.44	EJGTISR	null	776.39	7-6-2-0-0	2935.04	1	26.0335	0.0179925	3.14599	sp|P02763|A1AG1_HUMAN	3
MS2.2694.2694.2.1.dta	MS2.2688.2688.2.1.dta	2710.04	NEEYJK	null	796.347	5-4-1-0-0	1913.68	4	25.8611	0.0165125	4.08047	sp|P02763|A1AG1_HUMAN/sp|P19652|A1AG2_HUMAN	1
MS2.7350.7350.3.0.dta	MS2.7344.7344.3.0.dta	2958.16	EEQYJSTYR	null	1189.51	5-4-0-0-1	1768.64	4	25.6144	0.00913253	0.68484	sp|P01857|IGHG1_HUMAN	3
MS2.12168.12168.3.0.dta	MS2.12162.12162.3.0.dta	2930.29	TPLTAJITK	null	958.557	5-5-0-0-1	1971.72	5	25.5669	0.0127525	3.53597	sp|P01877|IGHA2_HUMAN	3
MS2.6785.6785.3.1.dta	MS2.6778.6778.3.1.dta	3104.22	EEQYJSTYR	null	1189.51	5-4-0-0-2	1914.7	4	25.0086	0.00767253	2.41224	sp|P01857|IGHG1_HUMAN	3
MS2.3849.3849.2.0.dta	MS2.3843.3843.2.0.dta	2710.02	NEEYJK	null	796.347	5-4-1-0-0	1913.68	4	24.8777	0.000182533	-1.04722	sp|P02763|A1AG1_HUMAN/sp|P19652|A1AG2_HUMAN	1
MS2.6586.6586.3.0.dta	MS2.6581.6581.3.0.dta	2979.22	YKJNSDISSTR	null	1284.62	4-3-1-0-1	1694.6	2	24.8561	0.00411253	1.31993	sp|P01871|IGHM_HUMAN	3
MS2.36739.36739.4.1.dta	MS2.36734.36734.4.1.dta	4758.17	SLGNVJFTVSAEALESQELCGTEVPSVPEHGRK	20,C(Carbamidomethyl[C]);	3541.72	5-2-0-0-0	1216.42	5	24.8204	0.0221525	4.48579	sp|P01023|A2MG_HUMAN	2
MS2.15912.15912.3.0.dta	MS2.15905.15905.3.0.dta	4028.67	NLFLJHSEJATAK	null	1458.73	6-5-2-0-0	2569.9	4	24.3771	0.0363125	4.64624	sp|P00738|HPT_HUMAN/sp|P00739|HPTR_HUMAN	3
MS2.2875.2875.3.0.dta	MS2.2870.2870.3.0.dta	2418.94	NEEYJK	null	796.347	5-4-0-0-0	1622.58	4	24.0965	0.00784253	0.53897	sp|P02763|A1AG1_HUMAN/sp|P19652|A1AG2_HUMAN	3
MS2.9252.9252.3.0.dta	MS2.9246.9246.3.0.dta	3344.37	YKJNSDISSTR	null	1284.62	5-4-1-0-1	2059.73	2	23.9383	0.0147725	2.29005	sp|P01871|IGHM_HUMAN	3
MS2.36746.36746.4.1.dta	MS2.36735.36735.4.1.dta	4979.19	SLGNVJFTVSAEALESQELCGTEVPSVPEHGR	20,C(Carbamidomethyl[C]);	3413.63	5-3-0-0-1	1565.56	5	23.461	0.00686253	7.88854	sp|P01023|A2MG_HUMAN	2
MS2.7585.7585.3.1.dta	MS2.7580.7580.3.1.dta	3547.45	YKJNSDISSTR	null	1284.62	5-5-1-0-1	2262.81	2	23.4449	0.0191825	2.65993	sp|P01871|IGHM_HUMAN	3
MS2.12738.12738.2.0.dta	MS2.12731.12731.2.0.dta	2869.19	STGKPTLYJVS	null	1166.61	8-2-0-0-0	1702.58	8	23.4382	0.00557253	0.70194	sp|P01871|IGHM_HUMAN/sp|P04220|MUCB_HUMAN	1
MS2.24063.24063.3.1.dta	MS2.24057.24057.3.1.dta	3508.54	SIJTTNVMGTSLTVR	null	1593.83	5-4-0-0-2	1914.7	2	23.3364	0.0130925	0.56214	sp|P01023|A2MG_HUMAN	3
MS2.30044.30044.3.0.dta	MS2.30038.30038.3.0.dta	4751.96	YFTPJKTEDTIFLR	null	1744.89	6-5-3-0-1	3007.06	4	23.3199	0.0144225	-1.3808	sp|P02763|A1AG1_HUMAN/sp|P19652|A1AG2_HUMAN	3
MS2.14109.14109.3.0.dta	MS2.14104.14104.3.0.dta	3344.36	YKJNSDISSTR	null	1284.62	5-4-1-0-1	2059.73	2	23.0266	0.00796253	3.16023	sp|P01871|IGHM_HUMAN	3
MS2.36324.36324.5.0.dta	MS2.36318.36318.5.0.dta	5287.3	SLGNVJFTVSAEALESQELCGTEVPSVPEHGR	20,C(Carbamidomethyl[C]);	3413.63	6-3-0-0-2	1873.67	5	22.9706	-0.000687467	-0.96712	sp|P01023|A2MG_HUMAN	3
MS2.27431.27431.3.1.dta	MS2.27425.27425.3.1.dta	4085.7	STGKPTLYJVSLVMSDTAGTCY	14,M(Oxidation[M]);21,C(Carbamidomethyl[C]);	2381.1	3-6-0-0-0	1704.63	8	22.9401	-0.0353175	-8.97524	sp|P01871|IGHM_HUMAN/sp|P04220|MUCB_HUMAN	3
MS2.36543.36543.4.1.dta	MS2.36538.36538.4.1.dta	5303.32	SLGNVJFTVSAEALESQELCGTEVPSVPEHGR	20,C(Carbamidomethyl[C]);	3413.63	7-3-0-0-1	1889.67	5	22.5626	0.0261325	9.92833	sp|P01023|A2MG_HUMAN	1
MS2.13184.13184.3.0.dta	MS2.13178.13178.3.0.dta	2764.12	EEQFJSTFR	null	1157.52	4-4-0-0-1	1606.59	4	22.2112	0.00757253	-0.96823	sp|P01859|IGHG2_HUMAN	3
MS2.3997.3997.2.1.dta	MS2.3991.3991.2.1.dta	3002.13	NEEYJK	null	796.347	5-4-1-0-2	2205.79	4	22.1827	-0.00633747	-2.00544	sp|P02763|A1AG1_HUMAN/sp|P19652|A1AG2_HUMAN	1
MS2.13130.13130.2.0.dta	MS2.13124.13124.2.0.dta	2872.25	TPLTAJITK	null	958.557	5-4-1-0-0	1913.68	5	22.1078	0.0120625	4.15827	sp|P01877|IGHA2_HUMAN	3
MS2.13330.13330.3.1.dta	MS2.13323.13323.3.1.dta	2967.2	EEQFJSTFR	null	1157.52	4-5-0-0-1	1809.67	4	21.9326	0.0119025	2.75941	sp|P01859|IGHG2_HUMAN	3
MS2.3800.3800.2.0.dta	MS2.3795.3795.2.0.dta	2209.89	JNSDISSTR	null	993.46	5-2-0-0-0	1216.42	0	21.137	0.00854253	3.05272	sp|P01871|IGHM_HUMAN	1
MS2.3479.3479.2.2.dta	MS2.3474.3474.2.2.dta	3003.14	NEEYJK	null	796.347	5-4-0-0-4	2206.81	4	20.9172	-0.0253875	-7.34074	sp|P02763|A1AG1_HUMAN/sp|P19652|A1AG2_HUMAN	1
MS2.26605.26605.4.1.dta	MS2.26599.26599.4.1.dta	4343.82	LVPVPITJATLDR	null	1408.82	7-6-2-0-0	2935.04	7	21.6968	-0.0292575	-4.34667	sp|P19652|A1AG2_HUMAN	3
MS2.37134.37134.4.1.dta	MS2.37128.37128.4.1.dta	5141.24	SLGNVJFTVSAEALESQELCGTEVPSVPEHGR	20,C(Carbamidomethyl[C]);	3413.63	6-3-0-0-1	1727.61	5	21.692	-0.00104747	3.34865	sp|P01023|A2MG_HUMAN	2
MS2.29512.29512.3.0.dta	MS2.29507.29507.3.0.dta	4988.02	YFTPJKTEDTIFLR	null	1744.89	8-6-2-0-1	3243.15	4	21.5409	-0.0163975	-1.99168	sp|P02763|A1AG1_HUMAN/sp|P19652|A1AG2_HUMAN	3
MS2.7290.7290.3.0.dta	MS2.7283.7283.3.0.dta	2796.11	EEQYJSTYR	null	1189.51	4-4-0-0-1	1606.59	4	20.7891	0.00830253	-0.08167	sp|P01857|IGHG1_HUMAN	3
MS2.3342.3342.3.1.dta	MS2.3337.3337.3.1.dta	3366.25	NEEYJK	null	796.347	6-5-2-0-0	2569.9	4	20.6136	0.00188253	-0.42145	sp|P02763|A1AG1_HUMAN/sp|P19652|A1AG2_HUMAN	3
MS2.30301.30301.3.0.dta	MS2.30294.30294.3.0.dta	4244.83	LAGKPTHVJVSVVMAEVDGTC	21,C(Carbamidomethyl[C]);	2184.08	5-4-0-0-3	2060.76	8	20.5243	0.000162533	-1.87446	sp|P01876|IGHA1_HUMAN	3
MS2.29359.29359.3.0.dta	MS2.29352.29352.3.0.dta	4438.98	VVLHPJYSQVDIGLIK	null	1795.01	7-6-1-0-0	2643.94	5	20.1187	0.0229625	5.62747	sp|P00738|HPT_HUMAN	3
MS2.33998.33998.4.4.dta	MS2.33993.33993.4.4.dta	4674.06	PVPITJATLDQITGK	null	1567.87	5-7-2-0-2	3106.13	5	19.7868	0.0642325	7.20044	sp|P02763|A1AG1_HUMAN	1
MS2.25608.25608.3.1.dta	MS2.25602.25602.3.1.dta	3491.5	SIJTTNVMGTSLTVR	null	1593.83	4-4-1-0-1	1897.68	2	20.0548	-0.0131875	-0.81547	sp|P01023|A2MG_HUMAN	3
MS2.32507.32507.4.0.dta	MS2.32503.32503.4.0.dta	4610.1	MVSHHJLTTGATLINEQWLLTTAK	null	2679.39	6-4-0-0-1	1930.69	5	20.0301	0.0106225	3.22418	sp|P00738|HPT_HUMAN/sp|P00739|HPTR_HUMAN	1
MS2.34619.34619.4.1.dta	MS2.34614.34614.4.1.dta	4979.21	SLGNVJFTVSAEALESQELCGTEVPSVPEHGR	20,C(Carbamidomethyl[C]);	3413.63	5-3-0-0-1	1565.56	5	19.8785	0.0209625	3.96905	sp|P01023|A2MG_HUMAN	2
MS2.8650.8650.3.1.dta	MS2.8645.8645.3.1.dta	3677.55	LAGKPTHVJVS	null	1122.63	5-5-1-0-3	2554.93	8	19.5948	-0.00410747	0.24643	sp|P01876|IGHA1_HUMAN	3
MS2.10547.10547.3.2.dta	MS2.10540.10540.3.2.dta	3631.4	YFTPJK	null	769.388	6-5-2-0-2	2862.02	4	19.5211	-0.00533747	0.27951	sp|P02763|A1AG1_HUMAN/sp|P19652|A1AG2_HUMAN	3
MS2.9474.9474.3.0.dta	MS2.9468.9468.3.0.dta	3704.44	YFTPJK	null	769.388	7-6-2-0-0	2935.04	4	19.2832	0.0124625	2.35426	sp|P02763|A1AG1_HUMAN/sp|P19652|A1AG2_HUMAN	3
MS2.4577.4577.3.0.dta	MS2.4572.4572.3.0.dta	3490.42	YKJNSDISSTR	null	1284.62	5-4-1-0-2	2205.79	2	19.2554	0.00950253	0.59823	sp|P01871|IGHM_HUMAN	3
MS2.3405.3405.3.0.dta	MS2.3398.3398.3.0.dta	3668.42	RNEEYJK	null	952.448	6-5-2-0-1	2715.96	5	19.0769	0.00850253	-0.70553	sp|P02763|A1AG1_HUMAN/sp|P19652|A1AG2_HUMAN	3
MS2.13888.13888.3.0.dta	MS2.13877.13877.3.0.dta	3344.36	YKJNSDISSTR	null	1284.62	5-4-1-0-1	2059.73	2	18.9956	0.00678253	2.49265	sp|P01871|IGHM_HUMAN	3
MS2.4810.4810.3.0.dta	MS2.4805.4805.3.0.dta	3506.41	MVSHHJLTTGAT	1,M(Oxidation[M]);	1284.6	6-4-1-0-1	2221.79	5	18.1964	0.0215425	3.68586	sp|P00738|HPT_HUMAN/sp|P00739|HPTR_HUMAN	3
MS2.36104.36104.4.0.dta	MS2.36098.36098.4.0.dta	4920.2	SLGNVJFTVSAEALESQELCGTEVPSVPEHGRK	20,C(Carbamidomethyl[C]);	3541.72	6-2-0-0-0	1378.48	5	17.6988	0.000292533	-3.56134	sp|P01023|A2MG_HUMAN	3
MS2.7004.7004.3.0.dta	MS2.6998.6998.3.0.dta	3547.44	YKJNSDISSTR	null	1284.62	5-5-1-0-1	2262.81	2	17.4496	0.00760253	1.56268	sp|P01871|IGHM_HUMAN	3
MS2.24492.24492.3.0.dta	MS2.24487.24487.3.0.dta	2810.26	SIJTTNVMGTSLTVR	null	1593.83	5-2-0-0-0	1216.42	2	17.3561	0.00714253	1.08424	sp|P01023|A2MG_HUMAN	2
MS2.36031.36031.4.0.dta	MS2.36026.36026.4.0.dta	5344.35	SLGNVJFTVSAEALESQELCGTEVPSVPEHGR	20,C(Carbamidomethyl[C]);	3413.63	6-4-0-0-1	1930.69	5	16.8497	0.0284825	4.57591	sp|P01023|A2MG_HUMAN	2
MS2.7226.7226.2.0.dta	MS2.7221.7221.2.0.dta	2593.03	EEQYJSTYR	null	1189.51	4-3-0-0-1	1403.51	4	16.7043	0.0116325	5.14417	sp|P01857|IGHG1_HUMAN	3
MS2.8041.8041.3.0.dta	MS2.8034.8034.3.0.dta	2958.16	EEQYJSTYR	null	1189.51	5-4-0-0-1	1768.64	4	16.5349	0.00818253	1.53385	sp|P01857|IGHG1_HUMAN	3
MS2.7325.7325.2.2.dta	MS2.7319.7319.2.2.dta	1757.71	EEQYJSTYR	null	1189.51	1-2-0-0-0	568.212	4	16.0568	-0.0152775	-8.86142	sp|P01857|IGHG1_HUMAN	1
MS2.7412.7412.2.0.dta	MS2.7405.7405.2.0.dta	2650.05	EEQYJSTYR	null	1189.51	4-4-0-0-0	1460.53	4	15.553	0.00836253	-0.1384	sp|P01857|IGHG1_HUMAN	3
MS2.26110.26110.3.0.dta	MS2.26104.26104.3.0.dta	4415.82	GLTFQQJASSMCVPDQDTAIR	12,C(Carbamidomethyl[C]);	2339.08	6-4-0-0-2	2076.75	6	15.165	-0.00284747	2.38162	sp|P01871|IGHM_HUMAN	2
MS2.7056.7056.2.0.dta	MS2.7048.7048.2.0.dta	2430.97	EEQYJSTYR	null	1189.51	3-3-0-0-1	1241.45	4	14.821	0.00630253	-0.08644	sp|P01857|IGHG1_HUMAN	3
MS2.34956.34956.2.2.dta	MS2.34950.34950.2.2.dta	2397.07	PVPITJATLDR	null	1196.66	4-2-0-0-1	1200.43	5	14.1874	-0.0237375	-9.38416	sp|P19652|A1AG2_HUMAN	1
MS2.8003.8003.3.0.dta	MS2.7996.7996.3.0.dta	2634.05	EEQYJSTYR	null	1189.51	3-4-0-0-1	1444.53	4	14.6204	0.00495253	-0.50413	sp|P01857|IGHG1_HUMAN	3
MS2.12700.12700.3.0.dta	MS2.12694.12694.3.0.dta	2967.2	EEQFJSTFR	null	1157.52	4-5-0-0-1	1809.67	4	14.2467	0.00980253	5.45902	sp|P01859|IGHG2_HUMAN	3
MS2.6936.6936.2.0.dta	MS2.6926.6926.2.0.dta	2593.02	EEQYJSTYR	null	1189.51	4-3-0-0-1	1403.51	4	13.1313	0.000932533	0.05402	sp|P01857|IGHG1_HUMAN	3
MS2.9312.9312.3.0.dta	MS2.9308.9308.3.0.dta	2683.08	YFTPJK	null	769.388	5-4-1-0-0	1913.68	4	12.6531	0.0114525	4.39651	sp|P02763|A1AG1_HUMAN/sp|P19652|A1AG2_HUMAN	3
MS2.2657.2657.3.0.dta	MS2.2651.2651.3.0.dta	2418.94	NEEYJK	null	796.347	5-4-0-0-0	1622.58	4	12.393	0.00949253	0.36706	sp|P02763|A1AG1_HUMAN/sp|P19652|A1AG2_HUMAN	3
MS2.2585.2585.3.0.dta	MS2.2577.2577.3.0.dta	2866.13	RNEEYJK	null	952.448	5-4-1-0-0	1913.68	5	12.3761	0.00841253	-0.19209	sp|P02763|A1AG1_HUMAN/sp|P19652|A1AG2_HUMAN	3
MS2.8332.8332.2.1.dta	MS2.8327.8327.2.1.dta	3104.2	EEQYJSTYR	null	1189.51	5-4-0-0-2	1914.7	4	12.3504	-0.00626747	-0.79496	sp|P01857|IGHG1_HUMAN	3
MS2.15524.15524.2.1.dta	MS2.15520.15520.2.1.dta	3218.26	EEQFJSTFR	null	1157.52	5-4-0-0-3	2060.76	4	11.7656	-0.0134775	-2.48078	sp|P01859|IGHG2_HUMAN	3
MS2.3600.3600.3.0.dta	MS2.3596.3596.3.0.dta	4166.6	EJGTISR	null	776.39	8-6-1-0-4	3390.23	1	11.6587	-0.0195975	-3.60382	sp|P02763|A1AG1_HUMAN	3
MS2.3590.3590.2.0.dta	MS2.3584.3584.2.0.dta	3075.18	NEEYJK	null	796.347	6-5-1-0-0	2278.81	4	11.4463	0.0210125	4.42308	sp|P02763|A1AG1_HUMAN/sp|P19652|A1AG2_HUMAN	1
MS2.36549.36549.4.1.dta	MS2.36542.36542.4.1.dta	4920.2	SLGNVJFTVSAEALESQELCGTEVPSVPEHGRK	20,C(Carbamidomethyl[C]);	3541.72	6-2-0-0-0	1378.48	5	11.2058	-0.00116747	0.41075	sp|P01023|A2MG_HUMAN	3
MS2.8332.8332.2.0.dta	MS2.8327.8327.2.0.dta	3103.2	EEQYJSTYR	null	1189.51	5-4-1-0-0	1913.68	4	9.72878	0.00660253	3.08091	sp|P01857|IGHG1_HUMAN	3

## Sheet: pMatchGlyco_results
QuerySpecName	QueryPrecursorMH	LibPrecursorMH	Charge	Sequence	Modification	GlycanMass	GlycanName	GlycoLoc	MatchedYIonNum	MatchedYIonIntSum	MatchedPepIonNum	MatchedPepIonIntSum	DPS	PS	pMatchGlyco_Score	DPSIon	PSIon	Overlap	Subset	Peptide is identical	Glycan is identical
MS2.3943.3943.3.0.dta	2616.05	993.46	3	JNSDISSTR	-	1622.58	5-4-0-0-0	1,	10	0.5149	7	0.13596	0.49978	7.76202	3.87933	b4+;y1+;y4+;y5+;y6+;y7+;y8+;Y0+;Y0+;Y1+;Y1+;Y2+;Y2+;Y3+;Y3+;Y4+;Y5+;	y5+;Y0+;Y0+;Y1+;Y1+;Y2+;Y3+;Y4+;Y5+;	Yes	1	1	1
MS2.25466.25466.3.1.dta	4107.73	2339.08	3	GLTFQQJASSMCVPDQDTAIR	12,Carbamidomethyl[C];	1768.64	5-4-0-0-1	7,	0	0	18	0.69475	0.51828	7.41551	3.8433	b2+;b3+;b5+;b8+;y1+;y2+;y3+;y4+;y5+;y6+;y7+;y8+;y9+;y10+;y11+;y12+;y13+;y14+;	y1+;y4+;y6+;y8+;y9+;y10+;y11+;y12+;y13+;	Yes	2	1	1
MS2.4362.4362.3.0.dta	2663.1	1284.62	3	YKJNSDISSTR	-	1378.48	6-2-0-0-0	3,	11	0.35337	16	0.22925	0.50657	7.46721	3.78264	b2+;b3+;b4+;b6+;b7+;b10+;y1+;y2+;y3+;y4+;y5+;y6+;y7+;y8+;y9+;y10+;Y0+;Y0+;Y1+;Y1+;Y2+;Y3+;Y0++;Y1++;Y1++;Y2++;Y3++;	b2+;y4+;y5+;y8+;y9+;Y0+;Y1+;Y0++;Y1++;	Yes	1	1	1
MS2.3054.3054.2.1.dta	2418.94	796.347	2	NEEYJK	-	1622.58	5-4-0-0-0	5,	5	0.41046	6	0.29066	0.50832	7.32789	3.72488	b2+;b3+;b4+;y2+;y3+;y4+;Y0+;Y0+;Y1+;Y1+;Y2+;	b2+;b3+;b4+;y2+;y3+;Y0+;Y0+;Y1+;	Yes	1	1	1
MS2.33196.33196.4.0.dta	4792.14	3413.63	4	SLGNVJFTVSAEALESQELCGTEVPSVPEHGR	20,Carbamidomethyl[C];	1378.48	6-2-0-0-0	6,	0	0	22	0.60478	0.46706	7.9208	3.69951	b2+;b3+;b4+;b5+;b7+;b8+;b9+;y1+;y2+;y3+;y5+;y6+;y7+;y8+;y9+;y10+;y11+;y12+;y13+;y14+;y15+;y17+;	b2+;b5+;y2+;y3+;y5+;y8+;y9+;y12+;y13+;y14+;	Yes	2	1	1
MS2.3906.3906.3.0.dta	2371.94	993.46	3	JNSDISSTR	-	1378.48	6-2-0-0-0	1,	4	0.56736	8	0.19048	0.49467	7.22116	3.57208	b2+;y1+;y3+;y4+;y5+;y6+;y7+;y8+;Y0+;Y0+;Y1+;Y1+;	y4+;y5+;y6+;y7+;Y0+;Y0+;Y1+;Y1+;	Yes	1	1	1
MS2.35482.35482.4.0.dta	4630.07	3413.63	4	SLGNVJFTVSAEALESQELCGTEVPSVPEHGR	20,Carbamidomethyl[C];	1216.42	5-2-0-0-0	6,	0	0	22	0.6181	0.47425	7.40564	3.51215	b2+;b3+;b4+;b5+;b7+;b9+;y1+;y2+;y3+;y4+;y5+;y6+;y7+;y8+;y9+;y10+;y11+;y12+;y13+;y14+;y15+;y17+;	b2+;b5+;y2+;y3+;y5+;y8+;y9+;y12+;y13+;	Yes	2	1	1
MS2.35197.35197.4.2.dta	4630.08	3413.63	4	SLGNVJFTVSAEALESQELCGTEVPSVPEHGR	20,Carbamidomethyl[C];	1216.42	5-2-0-0-0	6,	0	0	21	0.63276	0.47387	7.40564	3.50934	b2+;b3+;b4+;b5+;b6+;b7+;y1+;y2+;y3+;y5+;y6+;y7+;y8+;y9+;y10+;y11+;y12+;y13+;y14+;y15+;y17+;	b2+;b4+;y2+;y3+;y5+;y8+;y9+;y12+;y13+;	Yes	2	1	1
MS2.24228.24228.3.0.dta	2810.25	1593.83	3	SIJTTNVMGTSLTVR	-	1216.42	5-2-0-0-0	3,	4	0.12531	14	0.53915	0.49551	7.05179	3.49425	b2+;b3+;b4+;y1+;y3+;y5+;y6+;y7+;y8+;y9+;y10+;y11+;y12+;y13+;Y0+;Y0+;Y1+;Y1+;	y7+;y8+;y9+;y10+;y11+;y12+;Y0+;Y1+;	Yes	2	1	1
MS2.3165.3165.2.0.dta	2710.04	796.347	2	NEEYJK	-	1913.68	5-4-1-0-0	5,	4	0.31419	7	0.26885	0.47524	7.32789	3.48248	b2+;b3+;b4+;b5+;y2+;y3+;y4+;Y0+;Y0+;Y1+;Y1+;	b2+;b3+;b4+;y2+;y3+;Y0+;Y0+;Y1+;	Yes	1	1	1
MS2.3165.3165.2.1.dta	2711.04	796.347	2	NEEYJK	-	1914.7	5-4-0-0-2	5,	4	0.31419	7	0.26885	0.47524	7.32789	3.48248	b2+;b3+;b4+;b5+;y2+;y3+;y4+;Y0+;Y0+;Y1+;Y1+;	b2+;b3+;b4+;y2+;y3+;Y0+;Y0+;Y1+;	No
MS2.33158.33158.4.1.dta	4630.09	3413.63	4	SLGNVJFTVSAEALESQELCGTEVPSVPEHGR	20,Carbamidomethyl[C];	1216.42	5-2-0-0-0	6,	1	0.00202	22	0.55188	0.43737	7.9208	3.46434	b2+;b3+;b4+;b5+;b8+;b13+;y1+;y2+;y3+;y4+;y5+;y6+;y7+;y8+;y9+;y10+;y11+;y12+;y13+;y14+;y15+;y16+;Y0++;	b2+;b4+;b5+;y2+;y3+;y5+;y8+;y9+;y12+;y13+;	Yes	2	1	1
MS2.36417.36417.4.0.dta	4630.07	3413.63	4	SLGNVJFTVSAEALESQELCGTEVPSVPEHGR	20,Carbamidomethyl[C];	1216.42	5-2-0-0-0	6,	0	0	20	0.6615	0.46413	7.40564	3.43718	b2+;b3+;b4+;b5+;b7+;y1+;y2+;y3+;y4+;y5+;y6+;y7+;y8+;y9+;y10+;y11+;y12+;y13+;y14+;y15+;	b2+;b5+;y2+;y3+;y5+;y8+;y9+;y12+;y13+;	Yes	2	1	1
MS2.36164.36164.4.1.dta	4630.07	3413.63	4	SLGNVJFTVSAEALESQELCGTEVPSVPEHGR	20,Carbamidomethyl[C];	1216.42	5-2-0-0-0	6,	0	0	17	0.66423	0.43054	7.9208	3.4102	b2+;b3+;b4+;b7+;y1+;y2+;y3+;y4+;y5+;y6+;y7+;y8+;y9+;y10+;y12+;y13+;y14+;	b2+;y2+;y3+;y5+;y7+;y8+;y9+;y10+;y12+;y13+;	Yes	2	1	1
MS2.33120.33120.4.0.dta	4995.21	3413.63	4	SLGNVJFTVSAEALESQELCGTEVPSVPEHGR	20,Carbamidomethyl[C];	1581.56	6-3-0-0-0	6,	0	0	19	0.63118	0.44808	7.40564	3.31831	b2+;b3+;b4+;b5+;y1+;y2+;y3+;y4+;y5+;y6+;y7+;y8+;y9+;y10+;y11+;y12+;y13+;y14+;y17+;	b5+;y2+;y3+;y5+;y7+;y8+;y9+;y12+;y13+;	No
MS2.34107.34107.4.1.dta	4630.08	3413.63	4	SLGNVJFTVSAEALESQELCGTEVPSVPEHGR	20,Carbamidomethyl[C];	1216.42	5-2-0-0-0	6,	0	0	17	0.67303	0.44304	7.40564	3.281	b2+;b3+;b4+;b5+;b7+;y2+;y3+;y5+;y6+;y7+;y8+;y9+;y10+;y11+;y12+;y13+;y14+;	b4+;b5+;y2+;y3+;y5+;y8+;y9+;y12+;y13+;	Yes	2	1	1
MS2.26970.26970.3.0.dta	4415.85	2339.08	3	GLTFQQJASSMCVPDQDTAIR	12,Carbamidomethyl[C];	2076.75	6-4-0-0-2	7,	0	0	18	0.58936	0.47204	6.88992	3.25232	b3+;b5+;b6+;b8+;y1+;y2+;y3+;y4+;y5+;y6+;y7+;y8+;y9+;y10+;y11+;y12+;y13+;y14+;	y1+;y4+;y6+;y8+;y9+;y10+;y12+;y13+;	Yes	2	1	1
MS2.33304.33304.3.0.dta	4630.08	3413.63	3	SLGNVJFTVSAEALESQELCGTEVPSVPEHGR	20,Carbamidomethyl[C];	1216.42	5-2-0-0-0	6,	0	0	18	0.63238	0.4349	7.40564	3.22069	b2+;b3+;b4+;b5+;b7+;y1+;y2+;y3+;y5+;y6+;y7+;y8+;y9+;y10+;y11+;y12+;y13+;y14+;	b2+;y2+;y3+;y5+;y7+;y8+;y9+;y12+;y13+;	No
MS2.23959.23959.3.0.dta	3216.42	1593.83	3	SIJTTNVMGTSLTVR	-	1622.58	5-4-0-0-0	3,	5	0.29066	15	0.28186	0.45413	7.05179	3.20246	b2+;b3+;b4+;b7+;y1+;y3+;y4+;y5+;y6+;y7+;y8+;y9+;y10+;y11+;y12+;Y0+;Y0+;Y1+;Y1+;Y2+;	y1+;y7+;y8+;y9+;y10+;y11+;Y0+;Y1+;	Yes	1	1	1
MS2.2954.2954.2.2.dta	2711.04	796.347	2	NEEYJK	-	1914.7	5-4-0-0-2	5,	3	0.30936	7	0.27664	0.46303	6.7632	3.13159	b2+;b3+;b4+;b5+;y2+;y3+;y4+;Y0+;Y0+;Y1+;	b2+;b3+;y2+;y3+;Y0+;Y0+;Y1+;	No
MS2.2954.2954.2.0.dta	2710.04	796.347	2	NEEYJK	-	1913.68	5-4-1-0-0	5,	3	0.30936	7	0.27664	0.46303	6.7632	3.13159	b2+;b3+;b4+;b5+;y2+;y3+;y4+;Y0+;Y0+;Y1+;	b2+;b3+;y2+;y3+;Y0+;Y0+;Y1+;	Yes	1	1	1
MS2.12011.12011.2.0.dta	2930.29	958.557	2	TPLTAJITK	-	1971.72	5-5-0-0-1	6,	4	0.31716	11	0.21851	0.46739	6.66201	3.11373	b2+;b3+;b4+;b5+;b6+;b7+;b8+;y2+;y4+;y5+;y6+;Y0+;Y0+;Y1+;Y1+;	b3+;b4+;b6+;b7+;Y0+;Y0+;Y1+;	Yes	1	1	1
MS2.11849.11849.2.0.dta	2727.21	958.557	2	TPLTAJITK	-	1768.64	5-4-0-0-1	6,	5	0.32416	11	0.19975	0.4651	6.66201	3.09848	b2+;b3+;b4+;b6+;b7+;b8+;y2+;y4+;y5+;y6+;y7+;Y0+;Y0+;Y1+;Y1+;Y2+;	b3+;b4+;b6+;b7+;Y0+;Y0+;Y1+;	Yes	1	1	1
MS2.26932.26932.4.1.dta	4618.93	2339.08	4	GLTFQQJASSMCVPDQDTAIR	12,Carbamidomethyl[C];	2279.83	6-5-0-0-2	7,	0	0	18	0.53469	0.44958	6.88992	3.09755	b3+;b5+;b6+;b8+;y1+;y2+;y3+;y4+;y5+;y6+;y7+;y8+;y9+;y10+;y11+;y12+;y13+;y14+;	y1+;y4+;y6+;y8+;y9+;y10+;y12+;y13+;	Yes	2	1	1
MS2.4423.4423.3.0.dta	2907.21	1284.62	3	YKJNSDISSTR	-	1622.58	5-4-0-0-0	3,	10	0.37528	10	0.20078	0.44196	6.93937	3.06695	b2+;y1+;y2+;y3+;y4+;y5+;y6+;y7+;y8+;y9+;Y0+;Y0+;Y1+;Y1+;Y2+;Y3+;Y0++;Y0++;Y1++;Y1++;	y4+;y5+;y7+;Y0+;Y1+;Y2+;Y0++;Y1++;	Yes	1	1	1
MS2.37298.37298.4.0.dta	4630.07	3413.63	4	SLGNVJFTVSAEALESQELCGTEVPSVPEHGR	20,Carbamidomethyl[C];	1216.42	5-2-0-0-0	6,	0	0	18	0.63804	0.44549	6.88048	3.06518	b2+;b4+;b5+;b7+;y1+;y2+;y3+;y5+;y6+;y7+;y8+;y9+;y10+;y11+;y12+;y13+;y14+;y17+;	b2+;y2+;y3+;y5+;y8+;y9+;y12+;y13+;	Yes	2	1	1
MS2.36872.36872.4.0.dta	4630.07	3413.63	4	SLGNVJFTVSAEALESQELCGTEVPSVPEHGR	20,Carbamidomethyl[C];	1216.42	5-2-0-0-0	6,	0	0	18	0.66175	0.44473	6.88048	3.05997	b2+;b3+;b4+;b5+;b7+;y1+;y2+;y3+;y4+;y5+;y6+;y8+;y9+;y10+;y11+;y12+;y13+;y14+;	b2+;y2+;y3+;y5+;y8+;y9+;y12+;y13+;	Yes	2	1	1
MS2.4385.4385.3.0.dta	2501.05	1284.62	3	YKJNSDISSTR	-	1216.42	5-2-0-0-0	3,	10	0.28684	12	0.21259	0.43817	6.93937	3.04064	b2+;b3+;b6+;y1+;y3+;y4+;y5+;y6+;y7+;y8+;y9+;y10+;Y0+;Y0+;Y1+;Y1+;Y2+;Y0++;Y0++;Y1++;Y1++;Y2++;	y4+;y5+;y8+;y9+;Y0+;Y1+;Y0++;Y1++;	Yes	1	1	1
MS2.35879.35879.4.0.dta	4630.07	3413.63	4	SLGNVJFTVSAEALESQELCGTEVPSVPEHGR	20,Carbamidomethyl[C];	1216.42	5-2-0-0-0	6,	0	0	15	0.63861	0.40909	7.40564	3.02954	b2+;b4+;b5+;y1+;y2+;y3+;y5+;y6+;y7+;y8+;y9+;y10+;y12+;y13+;y14+;	b2+;y2+;y3+;y5+;y8+;y9+;y10+;y12+;y13+;	Yes	2	1	1
MS2.3795.3795.2.0.dta	2209.89	993.46	2	JNSDISSTR	-	1216.42	5-2-0-0-0	1,	5	0.47169	8	0.17765	0.45352	6.66201	3.02138	b2+;b4+;y1+;y3+;y4+;y5+;y6+;y7+;Y0+;Y0+;Y1+;Y1+;Y2+;	y4+;y5+;Y0+;Y0+;Y1+;Y1+;Y2+;	Yes	1	1	1
MS2.26787.26787.3.0.dta	4398.82	2339.08	3	GLTFQQJASSMCVPDQDTAIR	12,Carbamidomethyl[C];	2059.73	5-4-1-0-1	7,	0	0	18	0.56872	0.46448	6.34769	2.94838	b3+;b5+;b8+;b9+;y1+;y2+;y3+;y4+;y5+;y6+;y7+;y8+;y9+;y10+;y11+;y12+;y13+;y14+;	y1+;y4+;y6+;y8+;y9+;y10+;y13+;	Yes	2	1	1
MS2.4128.4128.3.0.dta	2819.13	993.46	3	JNSDISSTR	-	1825.66	5-5-0-0-0	1,	9	0.35431	10	0.18297	0.48268	6.07744	2.93349	b2+;b4+;y1+;y2+;y3+;y4+;y5+;y6+;y7+;y8+;Y0+;Y0+;Y1+;Y1+;Y2+;Y2+;Y3+;Y4+;Y5+;	y1+;y5+;Y0+;Y0+;Y1+;Y2+;	Yes	1	1	1
MS2.37980.37980.4.0.dta	4630.07	3413.63	4	SLGNVJFTVSAEALESQELCGTEVPSVPEHGR	20,Carbamidomethyl[C];	1216.42	5-2-0-0-0	6,	0	0	14	0.68114	0.42293	6.88048	2.90997	b2+;b4+;b5+;y2+;y3+;y5+;y6+;y7+;y8+;y9+;y12+;y13+;y14+;y15+;	b2+;y3+;y5+;y6+;y8+;y9+;y13+;y15+;	No
MS2.26861.26861.4.1.dta	4601.91	2339.08	4	GLTFQQJASSMCVPDQDTAIR	12,Carbamidomethyl[C];	2262.81	5-5-1-0-1	7,	0	0	19	0.53558	0.45512	6.34769	2.88895	b3+;b4+;b5+;b6+;b7+;b8+;y1+;y2+;y3+;y4+;y6+;y7+;y8+;y9+;y10+;y11+;y12+;y13+;y14+;	y1+;y4+;y6+;y8+;y9+;y10+;y13+;	Yes	2	1	1
MS2.3645.3645.3.1.dta	2711.04	796.347	3	NEEYJK	-	1914.7	5-4-0-0-2	5,	9	0.28518	7	0.20324	0.46732	6.17249	2.88453	b2+;b3+;b5+;y2+;y3+;y4+;y5+;Y0+;Y0+;Y1+;Y1+;Y2+;Y2+;Y3+;Y4+;Y5+;	b2+;b3+;y2+;y3+;Y0+;Y1+;	No
MS2.3645.3645.3.0.dta	2710.04	796.347	3	NEEYJK	-	1913.68	5-4-1-0-0	5,	9	0.28518	7	0.20324	0.46732	6.17249	2.88453	b2+;b3+;b5+;y2+;y3+;y4+;y5+;Y0+;Y0+;Y1+;Y1+;Y2+;Y2+;Y3+;Y4+;Y5+;	b2+;b3+;y2+;y3+;Y0+;Y1+;	Yes	1	1	1
MS2.3474.3474.2.0.dta	3001.14	796.347	2	NEEYJK	-	2204.77	5-4-2-0-0	5,	4	0.34619	6	0.26802	0.46451	6.17249	2.8672	b2+;b3+;b4+;y2+;y3+;y4+;Y0+;Y0+;Y1+;Y1+;	b2+;b3+;y2+;Y0+;Y0+;Y1+;	Yes	1	1	1
MS2.3474.3474.2.2.dta	3003.14	796.347	2	NEEYJK	-	2206.81	5-4-0-0-4	5,	4	0.34619	6	0.26802	0.46451	6.17249	2.8672	b2+;b3+;b4+;y2+;y3+;y4+;Y0+;Y0+;Y1+;Y1+;	b2+;b3+;y2+;Y0+;Y0+;Y1+;	Yes	1	1	1
MS2.3474.3474.2.1.dta	3002.14	796.347	2	NEEYJK	-	2205.79	5-4-1-0-2	5,	4	0.34619	6	0.26802	0.46451	6.17249	2.8672	b2+;b3+;b4+;y2+;y3+;y4+;Y0+;Y0+;Y1+;Y1+;	b2+;b3+;y2+;Y0+;Y0+;Y1+;	No
MS2.26550.26550.3.0.dta	4398.82	2339.08	3	GLTFQQJASSMCVPDQDTAIR	12,Carbamidomethyl[C];	2059.73	5-4-1-0-1	7,	0	0	19	0.52413	0.45019	6.34769	2.85765	b3+;b5+;b6+;b8+;b9+;y1+;y2+;y3+;y4+;y5+;y6+;y7+;y8+;y9+;y10+;y11+;y12+;y13+;y14+;	y1+;y4+;y6+;y8+;y9+;y10+;y13+;	Yes	2	1	1
MS2.4533.4533.3.0.dta	3110.29	1284.62	3	YKJNSDISSTR	-	1825.66	5-5-0-0-0	3,	7	0.28842	10	0.20713	0.43148	6.60334	2.84923	b2+;y1+;y2+;y3+;y4+;y5+;y6+;y7+;y8+;y9+;Y0+;Y0+;Y1+;Y1+;Y2+;Y2+;Y3+;	y4+;y5+;Y0+;Y0+;Y1+;Y1+;Y2+;	Yes	1	1	1
MS2.26825.26825.3.0.dta	4618.93	2339.08	3	GLTFQQJASSMCVPDQDTAIR	12,Carbamidomethyl[C];	2279.83	6-5-0-0-2	7,	0	0	19	0.51606	0.44704	6.34769	2.83765	b3+;b4+;b5+;b6+;y1+;y2+;y3+;y4+;y5+;y6+;y7+;y8+;y9+;y10+;y11+;y12+;y13+;y14+;y15+;	y1+;y4+;y6+;y8+;y9+;y10+;y13+;	Yes	2	1	1
MS2.3103.3103.3.0.dta	2418.94	796.347	3	NEEYJK	-	1622.58	5-4-0-0-0	5,	4	0.45218	4	0.18546	0.41778	6.7632	2.82552	b2+;b3+;y2+;y3+;Y0+;Y0+;Y1+;Y1+;	b2+;b3+;y2+;y3+;Y0+;Y0+;Y1+;	Yes	3	1	1
MS2.24072.24072.3.0.dta	3175.39	1593.83	3	SIJTTNVMGTSLTVR	-	1581.56	6-3-0-0-0	3,	4	0.2225	14	0.33497	0.43435	6.50134	2.82385	b2+;b3+;b4+;y1+;y3+;y4+;y5+;y6+;y7+;y8+;y9+;y10+;y11+;y12+;Y0+;Y0+;Y1+;Y1+;	y1+;y7+;y8+;y9+;y11+;Y0+;Y1+;	Yes	1	1	1
MS2.3275.3275.2.0.dta	2418.94	796.347	2	NEEYJK	-	1622.58	5-4-0-0-0	5,	7	0.26489	7	0.25957	0.45514	6.17249	2.80935	b2+;b3+;b5+;y1+;y2+;y4+;y5+;Y0+;Y0+;Y1+;Y1+;Y2+;Y3+;Y4+;	b2+;b3+;y2+;y4+;Y0+;Y1+;	Yes	1	1	1
MS2.26824.26824.4.1.dta	4398.82	2339.08	4	GLTFQQJASSMCVPDQDTAIR	12,Carbamidomethyl[C];	2059.73	5-4-1-0-1	7,	0	0	19	0.50008	0.4416	6.34769	2.80314	b3+;b5+;b6+;b8+;y1+;y2+;y3+;y4+;y5+;y6+;y7+;y8+;y9+;y10+;y11+;y12+;y13+;y14+;y15+;	y1+;y4+;y6+;y8+;y9+;y10+;y13+;	Yes	2	1	1
MS2.4138.4138.3.0.dta	2704.06	993.46	3	JNSDISSTR	-	1710.6	5-3-1-0-0	1,	8	0.4234	10	0.11766	0.45996	6.07744	2.79538	b2+;b4+;y1+;y2+;y3+;y4+;y5+;y6+;y7+;y8+;Y0+;Y0+;Y1+;Y1+;Y2+;Y3+;Y4+;Y5+;	y4+;y5+;Y0+;Y1+;Y1+;Y2+;	Yes	1	1	1
MS2.4138.4138.3.1.dta	2705.07	993.46	3	JNSDISSTR	-	1711.62	5-3-0-0-2	1,	8	0.4234	10	0.11766	0.45996	6.07744	2.79538	b2+;b4+;y1+;y2+;y3+;y4+;y5+;y6+;y7+;y8+;Y0+;Y0+;Y1+;Y1+;Y2+;Y3+;Y4+;Y5+;	y4+;y5+;Y0+;Y1+;Y1+;Y2+;	Yes	1	1	1
MS2.4570.4570.3.0.dta	2891.21	1284.62	3	YKJNSDISSTR	-	1606.59	4-4-0-0-1	3,	12	0.28089	11	0.20301	0.43701	6.39463	2.79451	b2+;b6+;y1+;y2+;y3+;y4+;y5+;y6+;y7+;y8+;y9+;Y0+;Y0+;Y1+;Y1+;Y2+;Y2+;Y3+;Y0++;Y0++;Y1++;Y1++;Y2++;	y4+;y5+;Y0+;Y1+;Y2+;Y0++;Y1++;	Yes	1	1	1
MS2.26788.26788.3.0.dta	4455.83	2339.08	3	GLTFQQJASSMCVPDQDTAIR	12,Carbamidomethyl[C];	2116.76	5-5-1-0-0	7,	0	0	14	0.56017	0.4337	6.34769	2.75301	b3+;y1+;y3+;y4+;y5+;y6+;y7+;y8+;y9+;y10+;y11+;y12+;y13+;y14+;	y1+;y4+;y6+;y8+;y9+;y10+;y12+;	No
MS2.26788.26788.3.1.dta	4456.85	2339.08	3	GLTFQQJASSMCVPDQDTAIR	12,Carbamidomethyl[C];	2117.78	5-5-0-0-2	7,	0	0	14	0.56017	0.4337	6.34769	2.75301	b3+;y1+;y3+;y4+;y5+;y6+;y7+;y8+;y9+;y10+;y11+;y12+;y13+;y14+;	y1+;y4+;y6+;y8+;y9+;y10+;y12+;	No
MS2.26895.26895.3.1.dta	4439.83	2339.08	3	GLTFQQJASSMCVPDQDTAIR	12,Carbamidomethyl[C];	2100.76	4-5-1-0-1	7,	0	0	13	0.58381	0.43224	6.34769	2.74374	b3+;y1+;y3+;y4+;y5+;y6+;y8+;y9+;y10+;y11+;y12+;y13+;y14+;	y1+;y4+;y6+;y8+;y9+;y10+;y13+;	No
MS2.37702.37702.4.0.dta	4630.07	3413.63	4	SLGNVJFTVSAEALESQELCGTEVPSVPEHGR	20,Carbamidomethyl[C];	1216.42	5-2-0-0-0	6,	0	0	12	0.653	0.39176	6.88048	2.69549	b2+;b4+;b5+;y1+;y2+;y3+;y5+;y7+;y8+;y9+;y12+;y13+;	y2+;y3+;y5+;y7+;y8+;y9+;y12+;y13+;	Yes	2	1	1
MS2.4350.4350.2.0.dta	2688.08	993.46	2	JNSDISSTR	-	1694.6	4-3-1-0-1	1,	8	0.22685	10	0.20355	0.44079	6.07744	2.67885	b2+;b4+;y1+;y2+;y3+;y4+;y5+;y6+;y7+;y8+;Y0+;Y0+;Y1+;Y1+;Y2+;Y3+;Y4+;Y5+;	y1+;y5+;Y0+;Y0+;Y1+;Y4+;	Yes	1	1	1
MS2.7097.7097.3.0.dta	2634.06	1189.51	3	EEQYJSTYR	-	1444.53	3-4-0-0-1	5,	10	0.34531	10	0.08829	0.40129	6.66201	2.67342	b2+;b3+;b4+;b6+;y1+;y2+;y3+;y4+;y5+;y7+;Y0+;Y0+;Y1+;Y1+;Y2+;Y2+;Y3+;Y3+;Y4+;Y4+;	y1+;Y0+;Y1+;Y1+;Y2+;Y3+;Y4+;	Yes	1	1	1
MS2.11936.11936.3.0.dta	2930.29	958.557	3	TPLTAJITK	-	1971.72	5-5-0-0-1	6,	7	0.26241	11	0.1636	0.43527	6.07744	2.64533	b2+;b3+;b4+;b6+;b7+;b8+;y2+;y3+;y4+;y5+;y6+;Y0+;Y0+;Y1+;Y1+;Y2+;Y3+;Y4+;	b4+;b6+;b7+;Y0+;Y1+;Y2+;	Yes	1	1	1
MS2.3867.3867.2.0.dta	2371.95	993.46	2	JNSDISSTR	-	1378.48	6-2-0-0-0	1,	8	0.44686	11	0.13677	0.47387	5.56242	2.63589	b2+;b4+;b5+;b6+;y1+;y2+;y3+;y4+;y6+;y7+;y8+;Y0+;Y0+;Y1+;Y1+;Y2+;Y2+;Y3+;Y4+;	y1+;y4+;Y0+;Y1+;Y1+;	Yes	1	1	1
MS2.4571.4571.3.0.dta	3053.27	1284.62	3	YKJNSDISSTR	-	1768.64	5-4-0-0-1	3,	9	0.27527	10	0.20583	0.4054	6.39463	2.59239	b2+;b7+;y1+;y3+;y4+;y5+;y6+;y7+;y8+;y9+;Y0+;Y0+;Y1+;Y1+;Y2+;Y3+;Y0++;Y0++;Y1++;	y4+;y5+;Y0+;Y1+;Y2+;Y3+;Y1++;	Yes	1	1	1
MS2.3534.3534.3.1.dta	3002.13	796.347	3	NEEYJK	-	2205.79	5-4-1-0-2	5,	9	0.27868	8	0.1562	0.46709	5.54676	2.59085	b2+;b3+;b4+;b5+;y2+;y3+;y4+;y5+;Y0+;Y0+;Y1+;Y1+;Y2+;Y3+;Y4+;Y4+;Y5+;	b2+;b3+;Y0+;Y0+;Y1+;	No
MS2.3534.3534.3.0.dta	3001.13	796.347	3	NEEYJK	-	2204.77	5-4-2-0-0	5,	9	0.27868	8	0.1562	0.46709	5.54676	2.59085	b2+;b3+;b4+;b5+;y2+;y3+;y4+;y5+;Y0+;Y0+;Y1+;Y1+;Y2+;Y3+;Y4+;Y4+;Y5+;	b2+;b3+;Y0+;Y0+;Y1+;	Yes	1	1	1
MS2.26624.26624.3.0.dta	4601.91	2339.08	3	GLTFQQJASSMCVPDQDTAIR	12,Carbamidomethyl[C];	2262.81	5-5-1-0-1	7,	0	0	20	0.50279	0.4471	5.78195	2.58509	b2+;b3+;b4+;b5+;b6+;b8+;y1+;y2+;y3+;y4+;y5+;y6+;y7+;y8+;y9+;y10+;y11+;y12+;y13+;y14+;	y1+;y4+;y6+;y8+;y9+;y10+;	Yes	2	1	1
MS2.26525.26525.5.0.dta	4601.9	2339.08	5	GLTFQQJASSMCVPDQDTAIR	12,Carbamidomethyl[C];	2262.81	5-5-1-0-1	7,	0	0	18	0.52192	0.44709	5.78195	2.58505	b3+;b5+;b6+;b8+;y1+;y2+;y3+;y4+;y5+;y6+;y7+;y8+;y9+;y10+;y11+;y12+;y13+;y14+;	y1+;y4+;y6+;y8+;y10+;y13+;	Yes	2	1	1
MS2.4496.4496.3.0.dta	2688.14	1284.62	3	YKJNSDISSTR	-	1403.51	4-3-0-0-1	3,	11	0.28106	13	0.20037	0.44119	5.82611	2.57044	b2+;b3+;b6+;b7+;y1+;y2+;y3+;y4+;y5+;y6+;y7+;y8+;y9+;Y0+;Y0+;Y1+;Y1+;Y2+;Y2+;Y0++;Y0++;Y1++;Y1++;Y2++;	y4+;y5+;Y0+;Y1+;Y0++;Y1++;	Yes	1	1	1
MS2.26588.26588.3.0.dta	4415.85	2339.08	3	GLTFQQJASSMCVPDQDTAIR	12,Carbamidomethyl[C];	2076.75	6-4-0-0-2	7,	0	0	20	0.48599	0.44422	5.78195	2.56848	b3+;b5+;b6+;b8+;b13+;y1+;y2+;y3+;y4+;y5+;y6+;y7+;y8+;y9+;y10+;y11+;y12+;y13+;y14+;y15+;	y1+;y4+;y6+;y8+;y9+;y10+;	Yes	2	1	1
MS2.2942.2942.3.1.dta	2711.04	796.347	3	NEEYJK	-	1914.7	5-4-0-0-2	5,	5	0.38683	7	0.17064	0.46095	5.54676	2.5568	b2+;b3+;b4+;b5+;y2+;y3+;y4+;Y0+;Y0+;Y1+;Y1+;Y3+;	b2+;b3+;Y0+;Y0+;Y1+;	No
MS2.2942.2942.3.0.dta	2710.03	796.347	3	NEEYJK	-	1913.68	5-4-1-0-0	5,	5	0.38683	7	0.17064	0.46095	5.54676	2.5568	b2+;b3+;b4+;b5+;y2+;y3+;y4+;Y0+;Y0+;Y1+;Y1+;Y3+;	b2+;b3+;Y0+;Y0+;Y1+;	Yes	1	1	1
MS2.33628.33628.5.0.dta	5327.34	3413.63	5	SLGNVJFTVSAEALESQELCGTEVPSVPEHGR	20,Carbamidomethyl[C];	1913.68	5-4-1-0-0	6,	0	0	21	0.55683	0.44121	5.77352	2.54733	b2+;b3+;b4+;b5+;b6+;b7+;y1+;y2+;y3+;y5+;y6+;y7+;y8+;y9+;y10+;y11+;y12+;y13+;y14+;y15+;y17+;	y2+;y3+;y5+;y8+;y9+;y12+;	Yes	2	1	1
MS2.3201.3201.3.0.dta	2710.03	796.347	3	NEEYJK	-	1913.68	5-4-1-0-0	5,	6	0.34559	7	0.16757	0.457	5.54676	2.53486	b2+;b3+;b4+;b5+;y2+;y3+;y4+;Y0+;Y0+;Y1+;Y1+;Y2+;Y3+;	b2+;b3+;Y0+;Y0+;Y1+;	Yes	1	1	1
MS2.3201.3201.3.1.dta	2711.04	796.347	3	NEEYJK	-	1914.7	5-4-0-0-2	5,	6	0.34559	7	0.16757	0.457	5.54676	2.53486	b2+;b3+;b4+;b5+;y2+;y3+;y4+;Y0+;Y0+;Y1+;Y1+;Y2+;Y3+;	b2+;b3+;Y0+;Y0+;Y1+;	No
MS2.27082.27082.4.0.dta	4601.9	2339.08	4	GLTFQQJASSMCVPDQDTAIR	12,Carbamidomethyl[C];	2262.81	5-5-1-0-1	7,	0	0	14	0.57269	0.43804	5.78195	2.53275	b3+;y1+;y3+;y4+;y5+;y6+;y7+;y8+;y9+;y10+;y11+;y12+;y13+;y14+;	y1+;y4+;y6+;y8+;y12+;y13+;	Yes	2	1	1
MS2.27082.27082.4.1.dta	4602.9	2339.08	4	GLTFQQJASSMCVPDQDTAIR	12,Carbamidomethyl[C];	2263.83	5-5-0-0-3	7,	0	0	14	0.57269	0.43804	5.78195	2.53275	b3+;y1+;y3+;y4+;y5+;y6+;y7+;y8+;y9+;y10+;y11+;y12+;y13+;y14+;	y1+;y4+;y6+;y8+;y12+;y13+;	No
MS2.28025.28025.4.3.dta	4893	2339.08	4	GLTFQQJASSMCVPDQDTAIR	12,Carbamidomethyl[C];	2553.91	5-5-2-0-1	7,	0	0	21	0.46003	0.43456	5.78195	2.51259	b3+;b4+;b5+;b6+;b8+;b9+;y1+;y2+;y3+;y4+;y5+;y6+;y7+;y8+;y9+;y10+;y11+;y12+;y13+;y14+;y15+;	y4+;y6+;y8+;y9+;y10+;y13+;	No
MS2.28025.28025.4.2.dta	4894.01	2339.08	4	GLTFQQJASSMCVPDQDTAIR	12,Carbamidomethyl[C];	2554.93	5-5-1-0-3	7,	0	0	21	0.46003	0.43456	5.78195	2.51259	b3+;b4+;b5+;b6+;b8+;b9+;y1+;y2+;y3+;y4+;y5+;y6+;y7+;y8+;y9+;y10+;y11+;y12+;y13+;y14+;y15+;	y4+;y6+;y8+;y9+;y10+;y13+;	No
MS2.7541.7541.3.0.dta	2488	1189.51	3	EEQYJSTYR	-	1298.48	3-4-0-0-0	5,	7	0.5224	6	0.06569	0.37339	6.66201	2.48756	b3+;b5+;y1+;y2+;y3+;y4+;Y0+;Y0+;Y1+;Y1+;Y2+;Y3+;Y4+;	y1+;Y0+;Y1+;Y1+;Y2+;Y3+;Y4+;	Yes	1	1	1
MS2.26750.26750.4.3.dta	4456.85	2339.08	4	GLTFQQJASSMCVPDQDTAIR	12,Carbamidomethyl[C];	2117.78	5-5-0-0-2	7,	0	0	17	0.49694	0.42602	5.78195	2.46324	b3+;b5+;b8+;y1+;y2+;y3+;y4+;y5+;y6+;y7+;y8+;y9+;y10+;y11+;y12+;y13+;y14+;	y1+;y4+;y6+;y8+;y10+;y13+;	Yes	2	1	1
MS2.12731.12731.2.0.dta	2869.19	1166.61	2	STGKPTLYJVS	-	1702.58	8-2-0-0-0	9,	3	0.23672	6	0.27241	0.37232	6.60334	2.45854	b4+;b7+;b8+;b9+;b10+;y7+;Y0+;Y0+;Y1+;	b7+;b8+;b10+;y7+;Y0+;Y0+;Y1+;	Yes	1	1	1
MS2.36538.36538.4.1.dta	5303.32	3413.63	4	SLGNVJFTVSAEALESQELCGTEVPSVPEHGR	20,Carbamidomethyl[C];	1889.67	7-3-0-0-1	6,	1	0.00492	17	0.60515	0.42562	5.77352	2.45735	b2+;b3+;b4+;b5+;y1+;y2+;y3+;y5+;y6+;y7+;y8+;y9+;y10+;y12+;y13+;y14+;y17+;Y1++;	y2+;y3+;y5+;y8+;y9+;y12+;	Yes	1	1	1
MS2.26826.26826.4.0.dta	4472.87	2339.08	4	GLTFQQJASSMCVPDQDTAIR	12,Carbamidomethyl[C];	2133.77	6-5-0-0-1	7,	0	0	20	0.485	0.4246	5.78195	2.45502	b3+;b5+;b6+;b8+;b9+;b11+;y1+;y2+;y3+;y4+;y5+;y7+;y8+;y9+;y10+;y11+;y12+;y13+;y14+;y15+;	y1+;y4+;y8+;y9+;y10+;y13+;	Yes	2	1	1
MS2.29848.29848.3.1.dta	3709.71	1795.01	3	VVLHPJYSQVDIGLIK	-	1914.7	5-4-0-0-2	6,	9	0.09082	20	0.27614	0.41987	5.79052	2.43126	b2+;b3+;b4+;b6+;b7+;b9+;b10+;b11+;b13+;b15+;y1+;y2+;y3+;y5+;y6+;y7+;y8+;y9+;y10+;y12+;Y0+;Y0+;Y1+;Y1+;Y0++;Y1++;Y2++;Y4++;Y5++;	b2+;b4+;y1+;y2+;y5+;Y1++;	No
MS2.29848.29848.3.0.dta	3708.71	1795.01	3	VVLHPJYSQVDIGLIK	-	1913.68	5-4-1-0-0	6,	9	0.09082	20	0.27614	0.41987	5.79052	2.43126	b2+;b3+;b4+;b6+;b7+;b9+;b10+;b11+;b13+;b15+;y1+;y2+;y3+;y5+;y6+;y7+;y8+;y9+;y10+;y12+;Y0+;Y0+;Y1+;Y1+;Y0++;Y1++;Y2++;Y4++;Y5++;	b2+;b4+;y1+;y2+;y5+;Y1++;	Yes	1	1	1
MS2.3980.3980.3.0.dta	3529.34	796.347	3	NEEYJK	-	2732.98	7-5-1-0-2	5,	7	0.32526	7	0.12224	0.43525	5.54676	2.41421	b2+;b3+;b4+;b5+;y2+;y3+;y4+;Y0+;Y0+;Y1+;Y1+;Y2+;Y3+;Y4+;	b2+;b3+;Y0+;Y0+;Y1+;	Yes	1	1	1
MS2.7393.7393.3.0.dta	2812.1	1189.51	3	EEQYJSTYR	-	1622.58	5-4-0-0-0	5,	8	0.49299	5	0.05716	0.35978	6.66201	2.39688	b3+;y1+;y2+;y3+;y4+;Y0+;Y0+;Y1+;Y1+;Y2+;Y3+;Y4+;Y4+;	y1+;Y0+;Y1+;Y1+;Y2+;Y3+;Y4+;	Yes	1	1	1
MS2.3609.3609.2.0.dta	2710.03	796.347	2	NEEYJK	-	1913.68	5-4-1-0-0	5,	7	0.25211	6	0.24714	0.43098	5.54676	2.39057	b2+;b3+;b5+;y2+;y4+;y5+;Y0+;Y0+;Y1+;Y1+;Y2+;Y3+;Y4+;	b2+;b3+;y2+;Y0+;Y1+;	Yes	1	1	1
MS2.3609.3609.2.1.dta	2711.04	796.347	2	NEEYJK	-	1914.7	5-4-0-0-2	5,	7	0.25211	6	0.24714	0.43098	5.54676	2.39057	b2+;b3+;b5+;y2+;y4+;y5+;Y0+;Y0+;Y1+;Y1+;Y2+;Y3+;Y4+;	b2+;b3+;y2+;Y0+;Y1+;	No
MS2.12880.12880.2.0.dta	2707.14	1166.61	2	STGKPTLYJVS	-	1540.53	7-2-0-0-0	9,	3	0.22034	5	0.29292	0.36138	6.60334	2.38635	b7+;b8+;b9+;b10+;y7+;Y0+;Y0+;Y1+;	b7+;b8+;b9+;b10+;y7+;Y0+;Y1+;	No
MS2.11824.11824.3.0.dta	2727.21	958.557	3	TPLTAJITK	-	1768.64	5-4-0-0-1	6,	5	0.38673	9	0.15471	0.43626	5.45862	2.38139	b3+;b4+;b5+;b6+;b7+;b8+;y4+;y5+;y6+;Y0+;Y0+;Y1+;Y1+;Y4+;	b6+;b7+;Y0+;Y0+;Y1+;	Yes	1	1	1
MS2.3756.3756.3.1.dta	3002.14	796.347	3	NEEYJK	-	2205.79	5-4-1-0-2	5,	9	0.253	7	0.15138	0.42668	5.54676	2.36669	b2+;b3+;b5+;y2+;y3+;y4+;y5+;Y0+;Y0+;Y1+;Y1+;Y2+;Y2+;Y3+;Y4+;Y5+;	b2+;b3+;y2+;Y0+;Y1+;	No
MS2.3756.3756.3.0.dta	3001.14	796.347	3	NEEYJK	-	2204.77	5-4-2-0-0	5,	9	0.253	7	0.15138	0.42668	5.54676	2.36669	b2+;b3+;b5+;y2+;y3+;y4+;y5+;Y0+;Y0+;Y1+;Y1+;Y2+;Y2+;Y3+;Y4+;Y5+;	b2+;b3+;y2+;Y0+;Y1+;	Yes	1	1	1
MS2.27727.27727.4.0.dta	3782.74	1795.01	4	VVLHPJYSQVDIGLIK	-	1987.71	6-5-0-0-0	6,	9	0.2	11	0.25559	0.37184	6.35679	2.36371	b2+;b4+;b13+;y1+;y2+;y3+;y4+;y5+;y6+;y10+;y12+;Y0+;Y0+;Y1+;Y0++;Y0++;Y1++;Y2++;Y3++;Y4++;	b4+;y2+;y4+;y5+;Y1+;Y1++;Y2++;	No
MS2.3314.3314.3.1.dta	3002.13	796.347	3	NEEYJK	-	2205.79	5-4-1-0-2	5,	8	0.32035	6	0.13687	0.42446	5.54676	2.35438	b2+;b3+;b5+;y2+;y3+;y4+;Y0+;Y0+;Y1+;Y1+;Y2+;Y3+;Y4+;Y5+;	b2+;b3+;Y0+;Y0+;Y1+;	No
MS2.3314.3314.3.0.dta	3001.13	796.347	3	NEEYJK	-	2204.77	5-4-2-0-0	5,	8	0.32035	6	0.13687	0.42446	5.54676	2.35438	b2+;b3+;b5+;y2+;y3+;y4+;Y0+;Y0+;Y1+;Y1+;Y2+;Y3+;Y4+;Y5+;	b2+;b3+;Y0+;Y0+;Y1+;	Yes	1	1	1
MS2.3388.3388.2.0.dta	2710.03	796.347	2	NEEYJK	-	1913.68	5-4-1-0-0	5,	4	0.18966	8	0.27913	0.42446	5.54676	2.35436	b2+;b3+;b5+;y1+;y2+;y3+;y4+;y5+;Y0+;Y0+;Y1+;Y2+;	b2+;b3+;y2+;y3+;Y0+;	Yes	1	1	1
MS2.3388.3388.2.1.dta	2711.04	796.347	2	NEEYJK	-	1914.7	5-4-0-0-2	5,	4	0.18966	8	0.27913	0.42446	5.54676	2.35436	b2+;b3+;b5+;y1+;y2+;y3+;y4+;y5+;Y0+;Y0+;Y1+;Y2+;	b2+;b3+;y2+;y3+;Y0+;	No
MS2.7506.7506.2.0.dta	2488	1189.51	2	EEQYJSTYR	-	1298.48	3-4-0-0-0	5,	7	0.51916	4	0.06898	0.35236	6.66201	2.34742	b3+;y1+;y2+;y3+;Y0+;Y0+;Y1+;Y1+;Y2+;Y3+;Y4+;	y1+;Y0+;Y0+;Y1+;Y1+;Y2+;Y3+;	No
MS2.3584.3584.2.1.dta	3076.17	796.347	2	NEEYJK	-	2279.83	6-5-0-0-2	5,	3	0.39248	4	0.18332	0.37836	6.17249	2.33541	b2+;b3+;y2+;y3+;Y0+;Y0+;Y1+;	b2+;b3+;y3+;Y0+;Y0+;Y1+;	No
MS2.3584.3584.2.0.dta	3075.18	796.347	2	NEEYJK	-	2278.81	6-5-1-0-0	5,	3	0.39248	4	0.18332	0.37836	6.17249	2.33541	b2+;b3+;y2+;y3+;Y0+;Y0+;Y1+;	b2+;b3+;y3+;Y0+;Y0+;Y1+;	Yes	1	1	1
MS2.26723.26723.3.0.dta	4472.83	2339.08	3	GLTFQQJASSMCVPDQDTAIR	12,Carbamidomethyl[C];	2133.77	6-5-0-0-1	7,	0	0	11	0.55241	0.40324	5.78195	2.33153	b3+;y1+;y4+;y5+;y6+;y8+;y9+;y10+;y12+;y13+;y14+;	y1+;y4+;y5+;y6+;y8+;y9+;	No
MS2.12868.12868.3.1.dta	3258.3	1555.71	3	THTJISESHPJATF	-	1702.58	8-2-0-0-0	11,	6	0.15442	7	0.41135	0.36615	6.33872	2.32092	b2+;b3+;b4+;b5+;b9+;y5+;y9+;Y0+;Y0+;Y1+;Y0++;Y0++;Y1++;	b2+;b3+;b9+;y5+;y9+;Y0+;Y1+;	Yes	1	1	1
MS2.17710.17710.3.2.dta	2672.08	757.399	3	NLFLJH	-	1914.7	5-4-0-0-2	5,	3	0.33855	7	0.17395	0.41739	5.54676	2.31514	b2+;b3+;b4+;y1+;y2+;y3+;y4+;Y0+;Y0+;Y1+;	b3+;y2+;Y0+;Y0+;Y1+;	No
MS2.17710.17710.3.0.dta	2671.08	757.399	3	NLFLJH	-	1913.68	5-4-1-0-0	5,	3	0.33855	7	0.17395	0.41739	5.54676	2.31514	b2+;b3+;b4+;y1+;y2+;y3+;y4+;Y0+;Y0+;Y1+;	b3+;y2+;Y0+;Y0+;Y1+;	No
MS2.36075.36075.3.0.dta	4630.07	3413.63	3	SLGNVJFTVSAEALESQELCGTEVPSVPEHGR	20,Carbamidomethyl[C];	1216.42	5-2-0-0-0	6,	0	0	9	0.66852	0.36393	6.33872	2.30688	b2+;y1+;y2+;y3+;y5+;y7+;y8+;y9+;y12+;	b2+;y2+;y3+;y5+;y8+;y9+;y12+;	No
MS2.38437.38437.4.1.dta	4630.07	3413.63	4	SLGNVJFTVSAEALESQELCGTEVPSVPEHGR	20,Carbamidomethyl[C];	1216.42	5-2-0-0-0	6,	0	0	9	0.6721	0.36183	6.33872	2.29351	b2+;b4+;b5+;y2+;y3+;y5+;y8+;y9+;y12+;	b2+;y2+;y3+;y5+;y8+;y9+;y12+;	No
MS2.27248.27248.4.1.dta	4634.94	2339.08	4	GLTFQQJASSMCVPDQDTAIR	12,Carbamidomethyl[C];	2295.82	7-5-0-0-1	7,	0	0	13	0.42784	0.36083	6.34769	2.29042	b3+;y1+;y3+;y4+;y5+;y6+;y8+;y9+;y10+;y11+;y12+;y13+;y14+;	y1+;y4+;y6+;y8+;y9+;y10+;y13+;	No
MS2.14238.14238.3.0.dta	2764.12	1157.52	3	EEQFJSTFR	-	1606.59	4-4-0-0-1	5,	9	0.32756	7	0.07491	0.33966	6.66201	2.2628	b3+;b4+;b6+;y1+;y2+;y3+;y4+;Y0+;Y0+;Y1+;Y1+;Y2+;Y3+;Y3+;Y4+;Y4+;	y1+;Y0+;Y1+;Y1+;Y2+;Y3+;Y4+;	Yes	1	1	1
MS2.34362.34362.4.1.dta	4630.09	3413.63	4	SLGNVJFTVSAEALESQELCGTEVPSVPEHGR	20,Carbamidomethyl[C];	1216.42	5-2-0-0-0	6,	0	0	15	0.60521	0.39155	5.77352	2.26061	b2+;b3+;b4+;b5+;y1+;y2+;y3+;y5+;y6+;y7+;y8+;y9+;y10+;y12+;y13+;	y3+;y5+;y7+;y8+;y9+;y12+;	Yes	2	1	1
MS2.4262.4262.2.0.dta	3053.2	993.46	2	JNSDISSTR	-	2059.73	5-4-1-0-1	1,	7	0.19225	10	0.21224	0.41412	5.45862	2.2605	b2+;b4+;b5+;y1+;y2+;y3+;y4+;y5+;y7+;y8+;Y0+;Y0+;Y1+;Y1+;Y2+;Y3+;Y4+;	y1+;y5+;Y0+;Y0+;Y1+;	Yes	1	1	1
MS2.4262.4262.2.2.dta	3054.2	993.46	2	JNSDISSTR	-	2060.76	5-4-0-0-3	1,	7	0.19225	10	0.21224	0.41412	5.45862	2.2605	b2+;b4+;b5+;y1+;y2+;y3+;y4+;y5+;y7+;y8+;Y0+;Y0+;Y1+;Y1+;Y2+;Y3+;Y4+;	y1+;y5+;Y0+;Y0+;Y1+;	No
MS2.37006.37006.3.0.dta	4630.06	3413.63	3	SLGNVJFTVSAEALESQELCGTEVPSVPEHGR	20,Carbamidomethyl[C];	1216.42	5-2-0-0-0	6,	0	0	9	0.72985	0.39048	5.77352	2.25442	b2+;b5+;y2+;y3+;y5+;y8+;y9+;y12+;y13+;	b5+;y3+;y5+;y8+;y9+;y13+;	No
MS2.32247.32247.4.0.dta	5164.32	3541.72	4	SLGNVJFTVSAEALESQELCGTEVPSVPEHGRK	20,Carbamidomethyl[C];	1622.58	5-4-0-0-0	6,	1	0.0057	17	0.53118	0.38943	5.78195	2.25169	b2+;b4+;b5+;b7+;b8+;y3+;y4+;y6+;y7+;y8+;y9+;y10+;y11+;y12+;y13+;y14+;y15+;Y0++;	y3+;y4+;y6+;y9+;y10+;y14+;	No
MS2.3090.3090.3.1.dta	3002.13	796.347	3	NEEYJK	-	2205.79	5-4-1-0-2	5,	6	0.30069	6	0.14321	0.40558	5.54676	2.24966	b2+;b3+;b4+;y2+;y3+;y4+;Y0+;Y0+;Y1+;Y1+;Y2+;Y3+;	b2+;b3+;Y0+;Y0+;Y1+;	No
MS2.3090.3090.3.0.dta	3001.13	796.347	3	NEEYJK	-	2204.77	5-4-2-0-0	5,	6	0.30069	6	0.14321	0.40558	5.54676	2.24966	b2+;b3+;b4+;y2+;y3+;y4+;Y0+;Y0+;Y1+;Y1+;Y2+;Y3+;	b2+;b3+;Y0+;Y0+;Y1+;	Yes	1	1	1
MS2.25805.25805.4.0.dta	3507.51	1593.83	4	SIJTTNVMGTSLTVR	-	1913.68	5-4-1-0-0	3,	5	0.20783	16	0.26198	0.42237	5.3185	2.24639	b2+;b3+;b4+;b7+;y1+;y3+;y4+;y5+;y6+;y7+;y8+;y9+;y10+;y11+;y12+;y13+;Y0+;Y0+;Y1+;Y1+;Y2+;	y7+;y8+;y10+;Y0+;Y1+;	Yes	1	1	1
MS2.25805.25805.4.3.dta	3508.52	1593.83	4	SIJTTNVMGTSLTVR	-	1914.7	5-4-0-0-2	3,	5	0.20783	16	0.26198	0.42237	5.3185	2.24639	b2+;b3+;b4+;b7+;y1+;y3+;y4+;y5+;y6+;y7+;y8+;y9+;y10+;y11+;y12+;y13+;Y0+;Y0+;Y1+;Y1+;Y2+;	y7+;y8+;y10+;Y0+;Y1+;	No
MS2.3349.3349.3.0.dta	2418.94	796.347	3	NEEYJK	-	1622.58	5-4-0-0-0	5,	4	0.40811	3	0.1632	0.36376	6.17249	2.24531	b2+;b3+;y2+;Y0+;Y0+;Y1+;Y1+;	b2+;b3+;y2+;Y0+;Y0+;Y1+;	Yes	3	1	1
MS2.7270.7270.3.1.dta	2999.19	1189.51	3	EEQYJSTYR	-	1809.67	4-5-0-0-1	5,	7	0.39774	6	0.07473	0.33611	6.66201	2.23919	b3+;b5+;y1+;y2+;y3+;y4+;Y0+;Y0+;Y1+;Y1+;Y2+;Y3+;Y4+;	y1+;y4+;Y0+;Y1+;Y1+;Y2+;Y3+;	Yes	1	1	1
MS2.12099.12099.3.0.dta	2768.23	958.557	3	TPLTAJITK	-	1809.67	4-5-0-0-1	6,	4	0.44275	4	0.14292	0.36657	6.07744	2.22779	b5+;b6+;b7+;b8+;Y0+;Y0+;Y1+;Y2+;	b6+;b7+;Y0+;Y0+;Y1+;Y2+;	Yes	3	1	1
MS2.33641.33641.4.0.dta	5344.37	3413.63	4	SLGNVJFTVSAEALESQELCGTEVPSVPEHGR	20,Carbamidomethyl[C];	1930.69	6-4-0-0-1	6,	1	0.00203	24	0.49399	0.43027	5.17648	2.22728	b2+;b3+;b4+;b5+;b6+;b7+;b8+;b9+;y1+;y2+;y3+;y4+;y5+;y6+;y7+;y8+;y9+;y10+;y11+;y12+;y13+;y14+;y15+;y17+;Y1++;	y2+;y3+;y5+;y8+;y9+;	Yes	2	1	1
MS2.4284.4284.2.1.dta	2543.01	993.46	2	JNSDISSTR	-	1549.57	4-3-0-0-2	1,	8	0.33105	2	0.13874	0.33363	6.66201	2.22264	y1+;y5+;Y0+;Y0+;Y1+;Y1+;Y2+;Y3+;Y4+;Y5+;	y1+;y5+;Y0+;Y1+;Y3+;Y4+;Y5+;	No
MS2.4284.4284.2.0.dta	2542.01	993.46	2	JNSDISSTR	-	1548.54	4-3-1-0-0	1,	8	0.33105	2	0.13874	0.33363	6.66201	2.22264	y1+;y5+;Y0+;Y0+;Y1+;Y1+;Y2+;Y3+;Y4+;Y5+;	y1+;y5+;Y0+;Y1+;Y3+;Y4+;Y5+;	No
MS2.26587.26587.4.1.dta	4398.83	2339.08	4	GLTFQQJASSMCVPDQDTAIR	12,Carbamidomethyl[C];	2059.73	5-4-1-0-1	7,	0	0	20	0.45946	0.42839	5.18431	2.2209	b3+;b5+;b6+;b8+;b9+;y1+;y2+;y3+;y4+;y5+;y6+;y7+;y8+;y9+;y10+;y11+;y12+;y13+;y14+;y15+;	y1+;y4+;y6+;y8+;y10+;	Yes	2	1	1
MS2.25503.25503.4.2.dta	4349.75	2339.08	4	GLTFQQJASSMCVPDQDTAIR	12,Carbamidomethyl[C];	2010.69	9-2-0-0-1	7,	0	0	16	0.44719	0.38399	5.78195	2.22023	b3+;b5+;b8+;y1+;y2+;y3+;y4+;y5+;y6+;y7+;y8+;y9+;y11+;y12+;y13+;y14+;	y1+;y3+;y4+;y5+;y6+;y8+;	No
MS2.6988.6988.2.0.dta	2634.05	1189.51	2	EEQYJSTYR	-	1444.53	3-4-0-0-1	5,	6	0.38196	8	0.1076	0.36524	6.07744	2.2197	b3+;b4+;b5+;b6+;y1+;y2+;y3+;y4+;Y0+;Y0+;Y1+;Y1+;Y2+;Y4+;	y1+;Y0+;Y0+;Y1+;Y1+;Y2+;	Yes	1	1	1
MS2.3757.3757.3.2.dta	3514.33	796.347	3	NEEYJK	-	2717.98	8-7-0-0-0	5,	6	0.29824	6	0.13061	0.39998	5.54676	2.21857	b2+;b3+;b4+;y2+;y3+;y4+;Y0+;Y0+;Y1+;Y1+;Y2+;Y3+;	b2+;b3+;Y0+;Y0+;Y1+;	Yes	1	1	1
MS2.3757.3757.3.1.dta	3513.33	796.347	3	NEEYJK	-	2716.98	6-5-1-0-3	5,	6	0.29824	6	0.13061	0.39998	5.54676	2.21857	b2+;b3+;b4+;y2+;y3+;y4+;Y0+;Y0+;Y1+;Y1+;Y2+;Y3+;	b2+;b3+;Y0+;Y0+;Y1+;	No
MS2.3757.3757.3.0.dta	3512.33	796.347	3	NEEYJK	-	2715.96	6-5-2-0-1	5,	6	0.29824	6	0.13061	0.39998	5.54676	2.21857	b2+;b3+;b4+;y2+;y3+;y4+;Y0+;Y0+;Y1+;Y1+;Y2+;Y3+;	b2+;b3+;Y0+;Y0+;Y1+;	Yes	1	1	1
MS2.3881.3881.3.0.dta	2778.1	993.46	3	JNSDISSTR	-	1784.63	6-4-0-0-0	1,	7	0.45487	5	0.12054	0.40598	5.45862	2.21609	y1+;y3+;y4+;y5+;y7+;Y0+;Y0+;Y1+;Y1+;Y2+;Y3+;Y4+;	y5+;Y0+;Y1+;Y2+;Y3+;	Yes	1	1	1
MS2.17503.17503.3.0.dta	3997.63	1920.85	3	QQJASSMCVPDQDTAIR	8,Carbamidomethyl[C];	2076.75	6-4-0-0-2	3,	2	0.02653	12	0.4745	0.38176	5.77352	2.20411	y1+;y3+;y4+;y5+;y6+;y8+;y9+;y10+;y11+;y12+;y13+;y14+;Y0++;Y1++;	y1+;y4+;y6+;y8+;y9+;y10+;	Yes	2	1	1
MS2.18432.18432.3.1.dta	4164.75	2339.08	3	GLTFQQJASSMCVPDQDTAIR	12,Carbamidomethyl[C];	1825.66	5-5-0-0-0	7,	0	0	16	0.63659	0.44776	4.91218	2.19946	b2+;b3+;b4+;b5+;b7+;b8+;y1+;y2+;y3+;y4+;y5+;y6+;y7+;y8+;y9+;y10+;	y1+;y4+;y6+;y8+;	No
MS2.32537.32537.4.0.dta	4758.18	3541.72	4	SLGNVJFTVSAEALESQELCGTEVPSVPEHGRK	20,Carbamidomethyl[C];	1216.42	5-2-0-0-0	6,	2	0.00555	21	0.3504	0.34584	6.34769	2.19529	b2+;b3+;b4+;b5+;b6+;b7+;b8+;b10+;y3+;y4+;y5+;y6+;y7+;y8+;y10+;y11+;y12+;y13+;y14+;y15+;y16+;Y0++;Y0++;	b2+;b4+;b5+;y3+;y4+;y6+;y10+;	No
MS2.37337.37337.4.1.dta	5141.25	3413.63	4	SLGNVJFTVSAEALESQELCGTEVPSVPEHGR	20,Carbamidomethyl[C];	1727.61	6-3-0-0-1	6,	0	0	15	0.5712	0.37988	5.77352	2.19327	b2+;b3+;b4+;b5+;b7+;y1+;y2+;y3+;y5+;y6+;y7+;y8+;y9+;y11+;y12+;	y2+;y3+;y5+;y8+;y9+;y12+;	No
MS2.26003.26003.4.0.dta	4601.9	2339.08	4	GLTFQQJASSMCVPDQDTAIR	12,Carbamidomethyl[C];	2262.81	5-5-1-0-1	7,	0	0	15	0.52249	0.42299	5.18431	2.1929	b3+;y1+;y2+;y3+;y4+;y5+;y6+;y7+;y8+;y9+;y10+;y11+;y12+;y13+;y14+;	y1+;y4+;y5+;y6+;y8+;	No
MS2.22395.22395.4.0.dta	4431.84	2355.07	4	GLTFQQJASSMCVPDQDTAIR	11,Oxidation[M];12,Carbamidomethyl[C];	2076.75	6-4-0-0-2	7,	1	0.00259	20	0.50402	0.42099	5.19226	2.1859	b3+;b4+;b5+;b6+;b8+;b13+;y1+;y2+;y3+;y4+;y5+;y6+;y7+;y8+;y9+;y10+;y11+;y12+;y13+;y14+;Y0++;	y1+;y4+;y6+;y8+;y13+;	Yes	2	1	1
MS2.27725.27725.3.0.dta	3782.74	1795.01	3	VVLHPJYSQVDIGLIK	-	1987.71	6-5-0-0-0	6,	7	0.07588	15	0.27582	0.37392	5.79052	2.16518	b2+;b4+;b10+;b11+;b12+;b14+;y1+;y2+;y3+;y4+;y5+;y6+;y9+;y10+;y12+;Y0+;Y1+;Y0++;Y0++;Y1++;Y1++;Y2++;	b2+;b4+;y2+;y4+;y5+;Y1++;	No
MS2.3053.3053.3.0.dta	2866.14	952.448	3	RNEEYJK	-	1913.68	5-4-1-0-0	6,	8	0.41748	4	0.02367	0.35179	6.13888	2.15957	b3+;b4+;b5+;b6+;Y0+;Y0+;Y1+;Y1+;Y2+;Y3+;Y4+;Y5+;	Y0+;Y1+;Y2+;Y3+;Y4+;Y5+;	Yes	3	1	1
MS2.3053.3053.3.1.dta	2867.14	952.448	3	RNEEYJK	-	1914.7	5-4-0-0-2	6,	8	0.41748	4	0.02367	0.35179	6.13888	2.15957	b3+;b4+;b5+;b6+;Y0+;Y0+;Y1+;Y1+;Y2+;Y3+;Y4+;Y5+;	Y0+;Y1+;Y2+;Y3+;Y4+;Y5+;	No
MS2.4670.4670.3.0.dta	2833.18	1284.62	3	YKJNSDISSTR	-	1548.54	4-3-1-0-0	3,	10	0.34683	10	0.15944	0.40992	5.22533	2.14195	b7+;y1+;y2+;y3+;y4+;y5+;y6+;y7+;y8+;y9+;Y0+;Y0+;Y1+;Y1+;Y2+;Y3+;Y0++;Y0++;Y1++;Y1++;	y5+;Y0+;Y1+;Y0++;Y1++;	Yes	1	1	1
MS2.4670.4670.3.1.dta	2834.18	1284.62	3	YKJNSDISSTR	-	1549.57	4-3-0-0-2	3,	10	0.34683	10	0.15944	0.40992	5.22533	2.14195	b7+;y1+;y2+;y3+;y4+;y5+;y6+;y7+;y8+;y9+;Y0+;Y0+;Y1+;Y1+;Y2+;Y3+;Y0++;Y0++;Y1++;Y1++;	y5+;Y0+;Y1+;Y0++;Y1++;	No
MS2.2730.2730.3.0.dta	2575.04	952.448	3	RNEEYJK	-	1622.58	5-4-0-0-0	6,	8	0.50184	2	0.02349	0.34779	6.13888	2.13504	b3+;b4+;Y0+;Y0+;Y1+;Y1+;Y2+;Y3+;Y4+;Y5+;	Y0+;Y1+;Y2+;Y3+;Y4+;Y5+;	Yes	3	1	1
MS2.3363.3363.3.0.dta	2784.07	796.347	3	NEEYJK	-	1987.71	6-5-0-0-0	5,	6	0.26314	6	0.13633	0.38429	5.54676	2.13158	b2+;b3+;b4+;y2+;y3+;y4+;Y0+;Y0+;Y1+;Y1+;Y2+;Y3+;	b2+;b3+;Y0+;Y0+;Y1+;	Yes	1	1	1
MS2.6840.6840.3.0.dta	2796.11	1189.51	3	EEQYJSTYR	-	1606.59	4-4-0-0-1	5,	7	0.34631	6	0.07581	0.31914	6.66201	2.12614	b2+;b3+;y1+;y2+;y3+;y4+;Y0+;Y0+;Y1+;Y1+;Y2+;Y3+;Y4+;	y1+;Y0+;Y1+;Y1+;Y2+;Y3+;Y4+;	Yes	1	1	1
MS2.26662.26662.2.3.dta	3000.23	1920.85	2	QQJASSMCVPDQDTAIR	8,Carbamidomethyl[C];	1079.4	2-3-0-0-1	3,	0	0	9	0.56352	0.36707	5.77352	2.11929	y1+;y3+;y4+;y6+;y8+;y9+;y10+;y12+;y13+;	y1+;y4+;y6+;y8+;y10+;y13+;	No
MS2.34132.34132.4.1.dta	5303.32	3413.63	4	SLGNVJFTVSAEALESQELCGTEVPSVPEHGR	20,Carbamidomethyl[C];	1889.67	7-3-0-0-1	6,	0	0	14	0.54357	0.36689	5.77352	2.11825	b2+;b4+;b5+;y2+;y3+;y5+;y6+;y7+;y8+;y9+;y10+;y12+;y13+;y15+;	y3+;y5+;y8+;y9+;y12+;y13+;	No
MS2.4399.4399.2.0.dta	2663.07	1284.62	2	YKJNSDISSTR	-	1378.48	6-2-0-0-0	3,	3	0.28367	6	0.22563	0.35036	6.02232	2.10997	b2+;y1+;y4+;y5+;y7+;y8+;Y0+;Y0+;Y1+;	y4+;y5+;y8+;Y0+;Y0+;Y1+;	No
MS2.24315.24315.3.0.dta	3175.39	1593.83	3	SIJTTNVMGTSLTVR	-	1581.56	6-3-0-0-0	3,	2	0.23625	8	0.26418	0.32313	6.50134	2.10078	y1+;y3+;y5+;y7+;y8+;y9+;y10+;y11+;Y0+;Y1+;	y1+;y7+;y8+;y9+;y10+;Y0+;Y1+;	Yes	1	1	1
MS2.14028.14028.3.0.dta	2926.17	1157.52	3	EEQFJSTFR	-	1768.64	5-4-0-0-1	5,	7	0.36997	5	0.06386	0.3142	6.66201	2.09323	b3+;y1+;y2+;y3+;y4+;Y0+;Y0+;Y1+;Y1+;Y2+;Y3+;Y4+;	y1+;Y0+;Y1+;Y1+;Y2+;Y3+;Y4+;	Yes	1	1	1
MS2.3423.3423.3.1.dta	2711.04	796.347	3	NEEYJK	-	1914.7	5-4-0-0-2	5,	7	0.28622	7	0.15192	0.42471	4.87333	2.06973	b2+;b3+;b5+;y2+;y3+;y4+;y5+;Y0+;Y0+;Y1+;Y1+;Y2+;Y3+;Y4+;	b2+;b3+;Y0+;Y1+;	No
MS2.3423.3423.3.0.dta	2710.04	796.347	3	NEEYJK	-	1913.68	5-4-1-0-0	5,	7	0.28622	7	0.15192	0.42471	4.87333	2.06973	b2+;b3+;b5+;y2+;y3+;y4+;y5+;Y0+;Y0+;Y1+;Y1+;Y2+;Y3+;Y4+;	b2+;b3+;Y0+;Y1+;	Yes	1	1	1
MS2.3720.3720.3.0.dta	3529.35	796.347	3	NEEYJK	-	2732.98	7-5-1-0-2	5,	7	0.28726	7	0.13619	0.42306	4.87333	2.06171	b2+;b3+;b4+;b5+;y2+;y3+;y4+;Y0+;Y0+;Y1+;Y1+;Y2+;Y3+;Y4+;	b2+;b3+;Y0+;Y1+;	No
MS2.32461.32461.4.0.dta	4920.23	3541.72	4	SLGNVJFTVSAEALESQELCGTEVPSVPEHGRK	20,Carbamidomethyl[C];	1378.48	6-2-0-0-0	6,	2	0.01177	17	0.35669	0.32355	6.34769	2.05379	b2+;b3+;b4+;b5+;b8+;b11+;y3+;y4+;y6+;y7+;y8+;y10+;y11+;y13+;y14+;y15+;y16+;Y0++;Y0++;	b2+;b5+;y3+;y4+;y6+;y10+;y13+;	No
MS2.38195.38195.4.0.dta	4630.07	3413.63	4	SLGNVJFTVSAEALESQELCGTEVPSVPEHGR	20,Carbamidomethyl[C];	1216.42	5-2-0-0-0	6,	0	0	11	0.70827	0.39586	5.17648	2.04917	b2+;b4+;b5+;y2+;y3+;y5+;y7+;y8+;y9+;y10+;y13+;	y3+;y5+;y8+;y9+;y13+;	No
MS2.32086.32086.4.2.dta	4959.23	2679.39	4	MVSHHJLTTGATLINEQWLLTTAK	-	2279.83	6-5-0-0-2	6,	4	0.06191	17	0.30345	0.35251	5.80803	2.04737	b4+;b6+;b7+;b8+;b13+;y1+;y2+;y3+;y4+;y5+;y6+;y7+;y8+;y9+;y10+;y11+;y17+;Y0++;Y0++;Y1++;Y1++;	y3+;y4+;y5+;y6+;y7+;y10+;	No
MS2.32086.32086.4.1.dta	4958.24	2679.39	4	MVSHHJLTTGATLINEQWLLTTAK	-	2278.81	6-5-1-0-0	6,	4	0.06191	17	0.30345	0.35251	5.80803	2.04737	b4+;b6+;b7+;b8+;b13+;y1+;y2+;y3+;y4+;y5+;y6+;y7+;y8+;y9+;y10+;y11+;y17+;Y0++;Y0++;Y1++;Y1++;	y3+;y4+;y5+;y6+;y7+;y10+;	Yes	1	1	1
MS2.17575.17575.3.0.dta	4200.7	1920.85	3	QQJASSMCVPDQDTAIR	8,Carbamidomethyl[C];	2279.83	6-5-0-0-2	3,	2	0.01888	13	0.4976	0.3953	5.17648	2.04627	y1+;y2+;y3+;y4+;y5+;y6+;y7+;y8+;y9+;y10+;y11+;y12+;y13+;Y0++;Y1++;	y1+;y4+;y6+;y8+;y10+;	Yes	2	1	1
MS2.14456.14456.3.0.dta	2764.12	1157.52	3	EEQFJSTFR	-	1606.59	4-4-0-0-1	5,	9	0.33647	7	0.06235	0.33356	6.07744	2.02722	b3+;b4+;b6+;y1+;y2+;y3+;y6+;Y0+;Y0+;Y1+;Y1+;Y2+;Y2+;Y3+;Y4+;Y4+;	y1+;Y0+;Y1+;Y1+;Y2+;Y4+;	Yes	1	1	1
MS2.4535.4535.3.0.dta	3256.36	1284.62	3	YKJNSDISSTR	-	1971.72	5-5-0-0-1	3,	11	0.17927	15	0.16655	0.38763	5.22533	2.02548	b2+;b3+;b4+;b6+;b7+;b10+;y1+;y2+;y3+;y4+;y5+;y6+;y7+;y8+;y9+;Y0+;Y0+;Y1+;Y1+;Y2+;Y2+;Y3+;Y0++;Y0++;Y1++;Y1++;	y4+;y5+;Y0+;Y1+;Y1++;	Yes	1	1	1
MS2.25639.25639.3.0.dta	4164.78	2339.08	3	GLTFQQJASSMCVPDQDTAIR	12,Carbamidomethyl[C];	1825.66	5-5-0-0-0	7,	0	0	13	0.42087	0.36521	5.52286	2.01699	b3+;y1+;y3+;y4+;y6+;y7+;y8+;y9+;y10+;y11+;y12+;y13+;y14+;	y4+;y6+;y8+;y10+;y13+;	No
MS2.17612.17612.4.0.dta	4200.71	1920.85	4	QQJASSMCVPDQDTAIR	8,Carbamidomethyl[C];	2279.83	6-5-0-0-2	3,	2	0.02083	11	0.51021	0.38945	5.17648	2.01597	y1+;y4+;y5+;y6+;y7+;y8+;y9+;y10+;y11+;y12+;y13+;Y0++;Y1++;	y4+;y6+;y8+;y9+;y10+;	Yes	2	1	1
MS2.27988.27988.3.0.dta	3417.6	1795.01	3	VVLHPJYSQVDIGLIK	-	1622.58	5-4-0-0-0	6,	3	0.07266	12	0.3131	0.34599	5.79052	2.00345	b2+;b4+;b7+;b11+;b12+;b13+;y1+;y2+;y4+;y5+;y6+;y12+;Y0+;Y1+;Y1++;	b4+;y2+;y4+;y5+;y12+;Y0+;	No
MS2.36734.36734.4.1.dta	4758.17	3541.72	4	SLGNVJFTVSAEALESQELCGTEVPSVPEHGRK	20,Carbamidomethyl[C];	1216.42	5-2-0-0-0	6,	0	0	15	0.35262	0.29057	6.88992	2.00203	b2+;b3+;b4+;b5+;b7+;y3+;y4+;y6+;y7+;y8+;y10+;y11+;y13+;y14+;y15+;	b2+;b4+;b5+;y3+;y4+;y6+;y10+;y13+;	Yes	2	1	1
MS2.2615.2615.2.2.dta	2418.94	796.347	2	NEEYJK	-	1622.58	5-4-0-0-0	5,	3	0.3017	3	0.17962	0.32214	6.17249	1.98841	b2+;b3+;y3+;Y0+;Y0+;Y1+;	b2+;b3+;y3+;Y0+;Y0+;Y1+;	No
MS2.22592.22592.4.2.dta	4618.9	2355.07	4	GLTFQQJASSMCVPDQDTAIR	11,Oxidation[M];12,Carbamidomethyl[C];	2263.83	5-5-0-0-3	7,	0	0	16	0.49901	0.38208	5.19226	1.98387	b3+;b6+;b8+;y1+;y2+;y3+;y4+;y5+;y6+;y8+;y9+;y10+;y11+;y12+;y13+;y14+;	y1+;y4+;y5+;y6+;y8+;	No
MS2.22592.22592.4.0.dta	4617.9	2355.07	4	GLTFQQJASSMCVPDQDTAIR	11,Oxidation[M];12,Carbamidomethyl[C];	2262.81	5-5-1-0-1	7,	0	0	16	0.49901	0.38208	5.19226	1.98387	b3+;b6+;b8+;y1+;y2+;y3+;y4+;y5+;y6+;y8+;y9+;y10+;y11+;y12+;y13+;y14+;	y1+;y4+;y5+;y6+;y8+;	Yes	2	1	1
MS2.32198.32198.3.0.dta	4593.1	2679.39	3	MVSHHJLTTGATLINEQWLLTTAK	-	1913.68	5-4-1-0-0	6,	4	0.02317	18	0.30378	0.34129	5.80803	1.98223	b4+;b6+;b7+;b8+;b11+;b14+;y1+;y2+;y3+;y4+;y5+;y6+;y7+;y9+;y10+;y11+;y15+;y16+;Y0++;Y0++;Y1++;Y1++;	b4+;b6+;y3+;y4+;y5+;y6+;	Yes	1	1	1
MS2.36100.36100.4.0.dta	4792.11	3413.63	4	SLGNVJFTVSAEALESQELCGTEVPSVPEHGR	20,Carbamidomethyl[C];	1378.48	6-2-0-0-0	6,	0	0	10	0.61028	0.34255	5.77352	1.97773	b2+;b4+;b5+;y2+;y3+;y5+;y7+;y8+;y12+;y13+;	b4+;y3+;y5+;y8+;y12+;y13+;	No
MS2.33230.33230.3.2.dta	4792.13	3413.63	3	SLGNVJFTVSAEALESQELCGTEVPSVPEHGR	20,Carbamidomethyl[C];	1378.48	6-2-0-0-0	6,	0	0	9	0.72204	0.38155	5.17648	1.97507	b2+;y3+;y5+;y8+;y9+;y10+;y12+;y13+;y14+;	y3+;y5+;y8+;y9+;y10+;	No
MS2.6986.6986.3.0.dta	2958.17	1189.51	3	EEQYJSTYR	-	1768.64	5-4-0-0-1	5,	7	0.31614	5	0.07053	0.29602	6.66201	1.97207	b3+;y1+;y2+;y3+;y4+;Y0+;Y0+;Y1+;Y1+;Y2+;Y3+;Y4+;	y1+;Y0+;Y1+;Y1+;Y2+;Y3+;Y4+;	Yes	1	1	1
MS2.17675.17675.3.0.dta	4037.62	1920.85	3	QQJASSMCVPDQDTAIR	8,Carbamidomethyl[C];	2116.76	5-5-1-0-0	3,	1	0.01456	9	0.54628	0.37958	5.17648	1.9649	y1+;y4+;y5+;y6+;y8+;y9+;y10+;y11+;y12+;Y1++;	y4+;y6+;y8+;y9+;y10+;	No
MS2.17675.17675.3.1.dta	4038.64	1920.85	3	QQJASSMCVPDQDTAIR	8,Carbamidomethyl[C];	2117.78	5-5-0-0-2	3,	1	0.01456	9	0.54628	0.37958	5.17648	1.9649	y1+;y4+;y5+;y6+;y8+;y9+;y10+;y11+;y12+;Y1++;	y4+;y6+;y8+;y9+;y10+;	No
MS2.7295.7295.2.0.dta	2812.1	1189.51	2	EEQYJSTYR	-	1622.58	5-4-0-0-0	5,	7	0.47004	3	0.04745	0.32095	6.07744	1.95056	b3+;y1+;y4+;Y0+;Y0+;Y1+;Y1+;Y2+;Y3+;Y4+;	Y0+;Y1+;Y1+;Y2+;Y3+;Y4+;	No
MS2.2868.2868.3.1.dta	3002.14	796.347	3	NEEYJK	-	2205.79	5-4-1-0-2	5,	4	0.28909	5	0.14005	0.35143	5.54676	1.94928	b2+;b3+;b4+;y2+;y3+;Y0+;Y0+;Y1+;Y4+;	b2+;b3+;Y0+;Y0+;Y1+;	No
MS2.2868.2868.3.0.dta	3001.13	796.347	3	NEEYJK	-	2204.77	5-4-2-0-0	5,	4	0.28909	5	0.14005	0.35143	5.54676	1.94928	b2+;b3+;b4+;y2+;y3+;Y0+;Y0+;Y1+;Y4+;	b2+;b3+;Y0+;Y0+;Y1+;	Yes	1	1	1
MS2.7183.7183.3.0.dta	3081.24	1167.56	3	MVSHHJLTTGA	-	1913.68	5-4-1-0-0	6,	4	0.30894	5	0.14555	0.32316	6.02232	1.9462	b4+;b5+;b6+;b7+;y7+;Y0+;Y0+;Y1+;Y1+;	b5+;b6+;b7+;Y0+;Y0+;Y1+;	No
MS2.7183.7183.3.1.dta	3082.25	1167.56	3	MVSHHJLTTGA	-	1914.7	5-4-0-0-2	6,	4	0.30894	5	0.14555	0.32316	6.02232	1.9462	b4+;b5+;b6+;b7+;y7+;Y0+;Y0+;Y1+;Y1+;	b5+;b6+;b7+;Y0+;Y0+;Y1+;	No
MS2.14678.14678.3.0.dta	2764.12	1157.52	3	EEQFJSTFR	-	1606.59	4-4-0-0-1	5,	7	0.39294	5	0.06342	0.32004	6.07744	1.94504	b3+;y1+;y2+;y3+;y4+;Y0+;Y0+;Y1+;Y1+;Y2+;Y3+;Y4+;	y1+;Y0+;Y1+;Y1+;Y2+;Y4+;	Yes	1	1	1
MS2.2688.2688.2.1.dta	2710.04	796.347	2	NEEYJK	-	1913.68	5-4-1-0-0	5,	3	0.28632	4	0.21735	0.35008	5.54676	1.94183	b2+;b3+;y2+;y3+;Y0+;Y0+;Y1+;	b2+;b3+;y3+;Y0+;Y0+;	Yes	1	1	1
MS2.2688.2688.2.2.dta	2711.04	796.347	2	NEEYJK	-	1914.7	5-4-0-0-2	5,	3	0.28632	4	0.21735	0.35008	5.54676	1.94183	b2+;b3+;y2+;y3+;Y0+;Y0+;Y1+;	b2+;b3+;y3+;Y0+;Y0+;	No
MS2.24387.24387.4.0.dta	4097.75	1744.89	4	YFTPJKTEDTIFLR	-	2352.85	7-6-0-0-0	5,	7	0.24062	8	0.19573	0.3343	5.79921	1.93865	b2+;y1+;y3+;y5+;y6+;y7+;y8+;y9+;Y0+;Y1+;Y0++;Y0++;Y1++;Y1++;Y2++;	y5+;y8+;Y1+;Y0++;Y0++;Y1++;	No
MS2.28243.28243.4.2.dta	4779.96	2339.08	4	GLTFQQJASSMCVPDQDTAIR	12,Carbamidomethyl[C];	2440.86	7-5-1-0-0	7,	0	0	12	0.46433	0.37297	5.18431	1.93358	b3+;y1+;y3+;y4+;y6+;y8+;y9+;y10+;y11+;y12+;y13+;y14+;	y4+;y6+;y8+;y10+;y13+;	No
MS2.25617.25617.4.0.dta	4310.8	2339.08	4	GLTFQQJASSMCVPDQDTAIR	12,Carbamidomethyl[C];	1971.72	5-5-0-0-1	7,	0	0	9	0.4226	0.33345	5.78195	1.92798	y1+;y2+;y4+;y6+;y8+;y9+;y10+;y12+;y14+;	y1+;y4+;y6+;y8+;y10+;y12+;	No
MS2.29351.29351.3.0.dta	4073.83	1795.01	3	VVLHPJYSQVDIGLIK	-	2278.81	6-5-1-0-0	6,	5	0.07065	11	0.29332	0.33041	5.79052	1.91323	b2+;b4+;b11+;y1+;y2+;y3+;y4+;y5+;y6+;y9+;y12+;Y1+;Y0++;Y1++;Y1++;Y2++;	b4+;y2+;y4+;y5+;y12+;Y1++;	Yes	1	1	1
MS2.4224.4224.3.0.dta	2688.07	993.46	3	JNSDISSTR	-	1694.6	4-3-1-0-1	1,	5	0.37401	5	0.11892	0.35029	5.45862	1.91209	b4+;y1+;y4+;y5+;y7+;Y0+;Y0+;Y1+;Y1+;Y2+;	y4+;y5+;Y0+;Y0+;Y1+;	Yes	3	1	1
MS2.4224.4224.3.1.dta	2689.07	993.46	3	JNSDISSTR	-	1695.62	4-3-0-0-3	1,	5	0.37401	5	0.11892	0.35029	5.45862	1.91209	b4+;y1+;y4+;y5+;y7+;Y0+;Y0+;Y1+;Y1+;Y2+;	y4+;y5+;Y0+;Y0+;Y1+;	No
MS2.25917.25917.3.1.dta	3483.51	1593.83	3	SIJTTNVMGTSLTVR	-	1889.67	7-3-0-0-1	3,	4	0.14558	15	0.21646	0.3582	5.3185	1.90511	b2+;b3+;b4+;b7+;y1+;y3+;y5+;y6+;y7+;y8+;y9+;y10+;y11+;y12+;y13+;Y0+;Y0+;Y1+;Y1+;	y1+;y7+;y8+;Y0+;Y1+;	Yes	1	1	1
MS2.27275.27275.3.0.dta	4618.93	2339.08	3	GLTFQQJASSMCVPDQDTAIR	12,Carbamidomethyl[C];	2279.83	6-5-0-0-2	7,	0	0	6	0.49035	0.32898	5.78195	1.90214	y1+;y4+;y6+;y8+;y9+;y10+;	y1+;y4+;y6+;y8+;y9+;y10+;	No
MS2.12928.12928.3.0.dta	3018.31	958.557	3	TPLTAJITK	-	2059.73	5-4-1-0-1	6,	8	0.18669	12	0.11296	0.39682	4.79306	1.90198	b3+;b4+;b6+;b7+;b8+;y2+;y3+;y4+;y5+;y6+;y7+;y8+;Y0+;Y0+;Y1+;Y1+;Y2+;Y3+;Y4+;Y5+;	b6+;b7+;Y0+;Y1+;	Yes	1	1	1
MS2.32310.32310.4.1.dta	4758.18	3541.72	4	SLGNVJFTVSAEALESQELCGTEVPSVPEHGRK	20,Carbamidomethyl[C];	1216.42	5-2-0-0-0	6,	3	0.00724	20	0.33011	0.32873	5.78195	1.9007	b2+;b3+;b4+;b6+;b8+;b9+;b11+;b12+;y3+;y5+;y6+;y7+;y8+;y10+;y11+;y12+;y13+;y14+;y15+;y16+;Y0++;Y0++;Y1++;	b2+;b4+;y3+;y6+;y10+;y13+;	No
MS2.26004.26004.3.0.dta	4617.92	2339.08	3	GLTFQQJASSMCVPDQDTAIR	12,Carbamidomethyl[C];	2278.81	6-5-1-0-0	7,	0	0	8	0.56412	0.36572	5.18431	1.89601	y1+;y3+;y4+;y5+;y6+;y8+;y9+;y12+;	y1+;y4+;y5+;y6+;y8+;	No
MS2.26004.26004.3.1.dta	4618.95	2339.08	3	GLTFQQJASSMCVPDQDTAIR	12,Carbamidomethyl[C];	2279.83	6-5-0-0-2	7,	0	0	8	0.56412	0.36572	5.18431	1.89601	y1+;y3+;y4+;y5+;y6+;y8+;y9+;y12+;	y1+;y4+;y5+;y6+;y8+;	No
MS2.5098.5098.3.1.dta	2980.23	1284.62	3	YKJNSDISSTR	-	1695.62	4-3-0-0-3	3,	10	0.25284	9	0.15271	0.36203	5.22533	1.89173	y1+;y2+;y3+;y4+;y5+;y6+;y7+;y8+;y9+;Y0+;Y0+;Y1+;Y1+;Y2+;Y0++;Y0++;Y1++;Y1++;Y2++;	y5+;Y0+;Y1+;Y0++;Y1++;	No
MS2.5098.5098.3.0.dta	2979.23	1284.62	3	YKJNSDISSTR	-	1694.6	4-3-1-0-1	3,	10	0.25284	9	0.15271	0.36203	5.22533	1.89173	y1+;y2+;y3+;y4+;y5+;y6+;y7+;y8+;y9+;Y0+;Y0+;Y1+;Y1+;Y2+;Y0++;Y0++;Y1++;Y1++;Y2++;	y5+;Y0+;Y1+;Y0++;Y1++;	Yes	1	1	1
MS2.13791.13791.3.0.dta	2926.17	1157.52	3	EEQFJSTFR	-	1768.64	5-4-0-0-1	5,	7	0.38004	5	0.05418	0.31101	6.07744	1.89015	b3+;y1+;y2+;y3+;y4+;Y0+;Y0+;Y1+;Y1+;Y2+;Y3+;Y4+;	Y0+;Y1+;Y1+;Y2+;Y3+;Y4+;	Yes	1	1	1
MS2.3978.3978.3.0.dta	3001.14	796.347	3	NEEYJK	-	2204.77	5-4-2-0-0	5,	6	0.23746	7	0.11835	0.38616	4.87333	1.8819	b2+;b3+;b4+;b5+;y2+;y3+;y4+;Y0+;Y0+;Y1+;Y1+;Y2+;Y4+;	b2+;b3+;Y0+;Y1+;	Yes	1	1	1
MS2.3978.3978.3.1.dta	3002.14	796.347	3	NEEYJK	-	2205.79	5-4-1-0-2	5,	6	0.23746	7	0.11835	0.38616	4.87333	1.8819	b2+;b3+;b4+;b5+;y2+;y3+;y4+;Y0+;Y0+;Y1+;Y1+;Y2+;Y4+;	b2+;b3+;Y0+;Y1+;	No
MS2.3978.3978.4.3.dta	4002.51	796.347	4	NEEYJK	-	3206.19	6-11-0-0-0	5,	6	0.23746	7	0.11835	0.38616	4.87333	1.8819	b2+;b3+;b4+;b5+;y2+;y3+;y4+;Y0+;Y0+;Y1+;Y1+;Y2+;Y4+;	b2+;b3+;Y0+;Y1+;	Yes	1	1	1
MS2.7319.7319.3.0.dta	2634.06	1189.51	3	EEQYJSTYR	-	1444.53	3-4-0-0-1	5,	7	0.38142	5	0.0608	0.30938	6.07744	1.88022	b3+;y1+;y2+;y3+;y4+;Y0+;Y0+;Y1+;Y1+;Y2+;Y3+;Y4+;	y1+;Y0+;Y1+;Y1+;Y2+;Y4+;	Yes	1	1	1
MS2.7319.7319.2.2.dta	1757.71	1189.51	2	EEQYJSTYR	-	568.212	1-2-0-0-0	5,	7	0.38142	5	0.0608	0.30938	6.07744	1.88022	b3+;y1+;y2+;y3+;y4+;Y0+;Y0+;Y1+;Y1+;Y2+;Y3+;Y4+;	y1+;Y0+;Y1+;Y1+;Y2+;Y4+;	Yes	1	1	1
MS2.19223.19223.3.1.dta	2963.19	757.399	3	NLFLJH	-	2205.79	5-4-1-0-2	5,	3	0.25942	6	0.14372	0.33882	5.54676	1.87934	b2+;b3+;b5+;y1+;y2+;y3+;Y0+;Y0+;Y1+;	b3+;y2+;Y0+;Y0+;Y1+;	No
MS2.19223.19223.3.0.dta	2962.18	757.399	3	NLFLJH	-	2204.77	5-4-2-0-0	5,	3	0.25942	6	0.14372	0.33882	5.54676	1.87934	b2+;b3+;b5+;y1+;y2+;y3+;Y0+;Y0+;Y1+;	b3+;y2+;Y0+;Y0+;Y1+;	Yes	1	1	1
MS2.29469.29469.4.0.dta	4090.86	1795.01	4	VVLHPJYSQVDIGLIK	-	2295.82	7-5-0-0-1	6,	10	0.2068	11	0.19174	0.36087	5.19226	1.87373	b2+;b4+;b10+;b11+;y1+;y2+;y4+;y5+;y6+;y9+;y12+;Y0+;Y1+;Y0++;Y0++;Y1++;Y1++;Y2++;Y3++;Y3++;Y4++;	b4+;y4+;y5+;Y1+;Y1++;	Yes	1	1	1
MS2.33845.33845.4.1.dta	5286.32	3413.63	4	SLGNVJFTVSAEALESQELCGTEVPSVPEHGR	20,Carbamidomethyl[C];	1872.65	6-3-1-0-0	6,	0	0	16	0.51967	0.36196	5.17648	1.87366	b2+;b3+;b4+;b5+;y1+;y2+;y3+;y5+;y6+;y7+;y8+;y9+;y10+;y12+;y13+;y14+;	y2+;y3+;y5+;y8+;y9+;	No
MS2.37927.37927.3.0.dta	4630.08	3413.63	3	SLGNVJFTVSAEALESQELCGTEVPSVPEHGR	20,Carbamidomethyl[C];	1216.42	5-2-0-0-0	6,	0	0	8	0.57635	0.32287	5.77352	1.86411	b4+;y2+;y3+;y5+;y7+;y8+;y9+;y12+;	y3+;y5+;y7+;y8+;y9+;y12+;	No
MS2.4052.4052.3.0.dta	2762.11	993.46	3	JNSDISSTR	-	1768.64	5-4-0-0-1	1,	6	0.28153	5	0.13339	0.34123	5.45862	1.86264	y1+;y4+;y5+;y6+;y7+;Y0+;Y0+;Y1+;Y1+;Y3+;Y4+;	y5+;Y0+;Y1+;Y3+;Y4+;	Yes	1	1	1
MS2.36306.36306.3.0.dta	4630.05	3413.63	3	SLGNVJFTVSAEALESQELCGTEVPSVPEHGR	20,Carbamidomethyl[C];	1216.42	5-2-0-0-0	6,	0	0	10	0.61177	0.35711	5.17648	1.84857	b2+;b4+;y2+;y3+;y5+;y7+;y8+;y9+;y12+;y13+;	y3+;y5+;y8+;y9+;y12+;	No
MS2.22317.22317.4.1.dta	4634.92	2339.08	4	GLTFQQJASSMCVPDQDTAIR	12,Carbamidomethyl[C];	2295.82	7-5-0-0-1	7,	0	0	10	0.47921	0.35607	5.18431	1.84597	y1+;y2+;y3+;y4+;y5+;y6+;y7+;y8+;y9+;y10+;	y1+;y4+;y6+;y7+;y8+;	Yes	2	1	0
MS2.6813.6813.2.0.dta	2958.17	1189.51	2	EEQYJSTYR	-	1768.64	5-4-0-0-1	5,	7	0.18593	10	0.12028	0.338	5.45862	1.84501	b3+;b4+;b5+;b6+;y1+;y2+;y3+;y4+;y5+;y7+;Y0+;Y0+;Y1+;Y1+;Y2+;Y3+;Y4+;	b3+;y1+;Y0+;Y1+;Y2+;	Yes	1	1	1
MS2.18431.18431.4.0.dta	4367.83	2339.08	4	GLTFQQJASSMCVPDQDTAIR	12,Carbamidomethyl[C];	2028.74	5-6-0-0-0	7,	0	0	17	0.4931	0.39671	4.6362	1.83925	b2+;b3+;b4+;b5+;b6+;b8+;b9+;y1+;y2+;y3+;y4+;y5+;y6+;y7+;y8+;y9+;y10+;	y1+;y4+;y6+;y8+;	No
MS2.32908.32908.4.0.dta	5455.43	3541.72	4	SLGNVJFTVSAEALESQELCGTEVPSVPEHGRK	20,Carbamidomethyl[C];	1913.68	5-4-1-0-0	6,	2	0.01054	16	0.44056	0.35461	5.18431	1.8384	b2+;b4+;b5+;b7+;b8+;y3+;y4+;y6+;y7+;y8+;y9+;y10+;y11+;y13+;y14+;y15+;Y0++;Y1++;	y3+;y4+;y6+;y9+;y10+;	No
MS2.32908.32908.4.2.dta	5456.44	3541.72	4	SLGNVJFTVSAEALESQELCGTEVPSVPEHGRK	20,Carbamidomethyl[C];	1914.7	5-4-0-0-2	6,	2	0.01054	16	0.44056	0.35461	5.18431	1.8384	b2+;b4+;b5+;b7+;b8+;y3+;y4+;y6+;y7+;y8+;y9+;y10+;y11+;y13+;y14+;y15+;Y0++;Y1++;	y3+;y4+;y6+;y9+;y10+;	No
MS2.34957.34957.5.0.dta	5327.33	3413.63	5	SLGNVJFTVSAEALESQELCGTEVPSVPEHGR	20,Carbamidomethyl[C];	1913.68	5-4-1-0-0	6,	0	0	8	0.54625	0.31811	5.77352	1.8366	b2+;y2+;y3+;y5+;y8+;y9+;y12+;y13+;	y3+;y5+;y8+;y9+;y12+;y13+;	No
MS2.34957.34957.5.1.dta	5328.32	3413.63	5	SLGNVJFTVSAEALESQELCGTEVPSVPEHGR	20,Carbamidomethyl[C];	1914.7	5-4-0-0-2	6,	0	0	8	0.54625	0.31811	5.77352	1.8366	b2+;y2+;y3+;y5+;y8+;y9+;y12+;y13+;	y3+;y5+;y8+;y9+;y12+;y13+;	No
MS2.33734.33734.4.3.dta	5166.29	3413.63	4	SLGNVJFTVSAEALESQELCGTEVPSVPEHGR	20,Carbamidomethyl[C];	1752.64	4-4-0-0-2	6,	0	0	16	0.45627	0.35191	5.17648	1.82167	b2+;b4+;b5+;b7+;b8+;y1+;y2+;y3+;y6+;y8+;y9+;y10+;y11+;y12+;y13+;y14+;	y2+;y3+;y8+;y9+;y12+;	No
MS2.33734.33734.4.2.dta	5165.29	3413.63	4	SLGNVJFTVSAEALESQELCGTEVPSVPEHGR	20,Carbamidomethyl[C];	1751.62	4-4-1-0-0	6,	0	0	16	0.45627	0.35191	5.17648	1.82167	b2+;b4+;b5+;b7+;b8+;y1+;y2+;y3+;y6+;y8+;y9+;y10+;y11+;y12+;y13+;y14+;	y2+;y3+;y8+;y9+;y12+;	Yes	2	1	1
MS2.19175.19175.3.0.dta	4455.85	2339.08	3	GLTFQQJASSMCVPDQDTAIR	12,Carbamidomethyl[C];	2116.76	5-5-1-0-0	7,	0	0	17	0.49291	0.39985	4.543	1.81653	b2+;b3+;b4+;b5+;b6+;b8+;b9+;y1+;y2+;y3+;y4+;y5+;y6+;y7+;y8+;y9+;y10+;	y1+;y4+;y6+;y8+;	No
MS2.29353.29353.4.1.dta	4073.83	1795.01	4	VVLHPJYSQVDIGLIK	-	2278.81	6-5-1-0-0	6,	8	0.18369	12	0.19355	0.34949	5.19226	1.81467	b4+;b10+;b11+;y1+;y2+;y3+;y4+;y5+;y6+;y9+;y10+;y12+;Y0+;Y0+;Y1+;Y0++;Y1++;Y2++;Y3++;Y4++;	b4+;y4+;y5+;Y1+;Y1++;	Yes	1	1	1
MS2.22518.22518.3.0.dta	4634.93	2355.07	3	GLTFQQJASSMCVPDQDTAIR	11,Oxidation[M];12,Carbamidomethyl[C];	2279.83	6-5-0-0-2	7,	0	0	18	0.49696	0.39503	4.55026	1.79751	b3+;b5+;b6+;b8+;y1+;y2+;y3+;y4+;y5+;y6+;y7+;y8+;y9+;y10+;y11+;y12+;y13+;y14+;	y1+;y4+;y6+;y8+;	Yes	2	1	1
MS2.4053.4053.3.0.dta	2981.17	776.39	3	EJGTISR	-	2204.77	5-4-2-0-0	2,	9	0.37283	3	0.01956	0.32557	5.5156	1.79572	y1+;y3+;y5+;Y0+;Y0+;Y1+;Y1+;Y2+;Y3+;Y4+;Y4+;Y5+;	Y1+;Y2+;Y3+;Y4+;Y5+;	Yes	3	1	1
MS2.4053.4053.3.1.dta	2982.18	776.39	3	EJGTISR	-	2205.79	5-4-1-0-2	2,	9	0.37283	3	0.01956	0.32557	5.5156	1.79572	y1+;y3+;y5+;Y0+;Y0+;Y1+;Y1+;Y2+;Y3+;Y4+;Y4+;Y5+;	Y1+;Y2+;Y3+;Y4+;Y5+;	No
MS2.36735.36735.4.1.dta	4979.19	3413.63	4	SLGNVJFTVSAEALESQELCGTEVPSVPEHGR	20,Carbamidomethyl[C];	1565.56	5-3-0-0-1	6,	0	0	8	0.52725	0.30957	5.77352	1.7873	b4+;y2+;y3+;y5+;y8+;y9+;y12+;y13+;	y2+;y3+;y5+;y8+;y9+;y13+;	Yes	2	1	1
MS2.33708.33708.6.1.dta	5327.26	3413.63	6	SLGNVJFTVSAEALESQELCGTEVPSVPEHGR	20,Carbamidomethyl[C];	1913.68	5-4-1-0-0	6,	0	0	12	0.54808	0.3452	5.17648	1.78694	b2+;b4+;b5+;y1+;y2+;y3+;y5+;y8+;y9+;y10+;y12+;y13+;	y3+;y5+;y8+;y9+;y12+;	Yes	2	1	1
MS2.14715.14715.3.0.dta	2967.2	1157.52	3	EEQFJSTFR	-	1809.67	4-5-0-0-1	5,	6	0.3862	4	0.0523	0.29379	6.07744	1.78551	y1+;y2+;y3+;y4+;Y0+;Y0+;Y1+;Y1+;Y2+;Y3+;	Y0+;Y0+;Y1+;Y1+;Y2+;Y3+;	Yes	1	1	1
MS2.7505.7505.3.0.dta	2650.05	1189.51	3	EEQYJSTYR	-	1460.53	4-4-0-0-0	5,	7	0.52952	1	0.02196	0.2931	6.07744	1.78129	y1+;Y0+;Y0+;Y1+;Y1+;Y2+;Y3+;Y4+;	y1+;Y0+;Y1+;Y2+;Y3+;Y4+;	No
MS2.19464.19464.3.0.dta	4496.87	2339.08	3	GLTFQQJASSMCVPDQDTAIR	12,Carbamidomethyl[C];	2157.78	4-6-1-0-0	7,	0	0	12	0.54538	0.39204	4.543	1.78104	b3+;b8+;y1+;y2+;y3+;y4+;y5+;y6+;y7+;y8+;y9+;y10+;	y1+;y4+;y6+;y8+;	No
MS2.3843.3843.2.0.dta	2710.02	796.347	2	NEEYJK	-	1913.68	5-4-1-0-0	5,	3	0.21069	6	0.19689	0.36444	4.87333	1.77603	b2+;b3+;b4+;y2+;y3+;y4+;Y0+;Y0+;Y1+;	b2+;b3+;Y0+;Y1+;	Yes	1	1	1
MS2.12162.12162.3.0.dta	2930.29	958.557	3	TPLTAJITK	-	1971.72	5-5-0-0-1	6,	4	0.38626	3	0.13039	0.32525	5.45862	1.77543	b5+;b6+;b7+;Y0+;Y0+;Y1+;Y2+;	b7+;Y0+;Y0+;Y1+;Y2+;	Yes	3	1	1
MS2.36318.36318.5.0.dta	5287.3	3413.63	5	SLGNVJFTVSAEALESQELCGTEVPSVPEHGR	20,Carbamidomethyl[C];	1873.67	6-3-0-0-2	6,	0	0	8	0.54224	0.3075	5.77352	1.77537	b2+;y1+;y2+;y3+;y5+;y8+;y9+;y12+;	y2+;y3+;y5+;y8+;y9+;y12+;	Yes	3	1	1
MS2.3868.3868.3.0.dta	2710.03	796.347	3	NEEYJK	-	1913.68	5-4-1-0-0	5,	3	0.29366	4	0.1325	0.31906	5.54676	1.76972	b2+;b3+;y2+;y3+;Y0+;Y0+;Y1+;	b2+;b3+;Y0+;Y0+;Y1+;	Yes	1	1	1
MS2.3868.3868.3.1.dta	2711.03	796.347	3	NEEYJK	-	1914.7	5-4-0-0-2	5,	3	0.29366	4	0.1325	0.31906	5.54676	1.76972	b2+;b3+;y2+;y3+;Y0+;Y0+;Y1+;	b2+;b3+;Y0+;Y0+;Y1+;	No
MS2.26690.26690.3.1.dta	4659.9	2339.08	3	GLTFQQJASSMCVPDQDTAIR	12,Carbamidomethyl[C];	2320.86	5-6-0-0-2	7,	0	0	7	0.5201	0.34106	5.18431	1.76814	y1+;y3+;y4+;y6+;y8+;y9+;y12+;	y1+;y4+;y6+;y8+;y12+;	No
MS2.26690.26690.3.0.dta	4658.88	2339.08	3	GLTFQQJASSMCVPDQDTAIR	12,Carbamidomethyl[C];	2319.84	5-6-1-0-0	7,	0	0	7	0.5201	0.34106	5.18431	1.76814	y1+;y3+;y4+;y6+;y8+;y9+;y12+;	y1+;y4+;y6+;y8+;y12+;	No
MS2.23773.23773.4.1.dta	4908.99	2339.08	4	GLTFQQJASSMCVPDQDTAIR	12,Carbamidomethyl[C];	2569.9	6-5-2-0-0	7,	0	0	12	0.41393	0.33893	5.18431	1.75714	b3+;b8+;y1+;y2+;y3+;y4+;y5+;y6+;y7+;y8+;y9+;y10+;	y1+;y4+;y6+;y8+;y10+;	No
MS2.3991.3991.2.1.dta	3002.13	796.347	2	NEEYJK	-	2205.79	5-4-1-0-2	5,	3	0.22405	4	0.18947	0.31659	5.54676	1.75606	b2+;b3+;y2+;y3+;Y0+;Y0+;Y1+;	b2+;b3+;y3+;Y0+;Y1+;	Yes	1	1	1
MS2.14493.14493.3.0.dta	2967.2	1157.52	3	EEQFJSTFR	-	1809.67	4-5-0-0-1	5,	8	0.32136	7	0.06473	0.32156	5.45862	1.75525	b3+;b4+;b7+;y1+;y2+;y3+;y4+;Y0+;Y0+;Y1+;Y1+;Y2+;Y2+;Y3+;Y4+;	y1+;Y0+;Y1+;Y1+;Y2+;	Yes	1	1	1
MS2.39096.39096.4.1.dta	4630.07	3413.63	4	SLGNVJFTVSAEALESQELCGTEVPSVPEHGR	20,Carbamidomethyl[C];	1216.42	5-2-0-0-0	6,	0	0	7	0.56096	0.30376	5.77352	1.75374	y1+;y2+;y3+;y5+;y8+;y9+;y12+;	y2+;y3+;y5+;y8+;y9+;y12+;	No
MS2.35941.35941.4.0.dta	5141.28	3413.63	4	SLGNVJFTVSAEALESQELCGTEVPSVPEHGR	20,Carbamidomethyl[C];	1727.61	6-3-0-0-1	6,	0	0	13	0.50183	0.33762	5.17648	1.74771	b2+;b4+;b5+;y2+;y3+;y5+;y7+;y8+;y9+;y10+;y12+;y13+;y14+;	y2+;y3+;y5+;y8+;y9+;	No
MS2.19463.19463.3.2.dta	4455.84	2339.08	3	GLTFQQJASSMCVPDQDTAIR	12,Carbamidomethyl[C];	2116.76	5-5-1-0-0	7,	0	0	12	0.54188	0.38391	4.543	1.74411	b3+;b5+;b8+;y1+;y2+;y3+;y4+;y5+;y6+;y8+;y9+;y10+;	y1+;y4+;y6+;y8+;	No
MS2.4028.4028.3.1.dta	2867.12	993.46	3	JNSDISSTR	-	1873.67	6-3-0-0-2	1,	7	0.41445	7	0.06143	0.36365	4.79306	1.74299	b4+;y1+;y3+;y4+;y6+;y7+;y8+;Y0+;Y0+;Y1+;Y1+;Y2+;Y3+;Y4+;	y4+;Y0+;Y1+;Y1+;	No
MS2.4028.4028.3.0.dta	2866.12	993.46	3	JNSDISSTR	-	1872.65	6-3-1-0-0	1,	7	0.41445	7	0.06143	0.36365	4.79306	1.74299	b4+;y1+;y3+;y4+;y6+;y7+;y8+;Y0+;Y0+;Y1+;Y1+;Y2+;Y3+;Y4+;	y4+;Y0+;Y1+;Y1+;	Yes	1	1	1
MS2.14215.14215.3.0.dta	3309.4	958.557	3	TPLTAJITK	-	2350.83	5-4-2-0-1	6,	6	0.25067	9	0.10971	0.36364	4.79306	1.74295	b2+;b3+;b4+;b5+;b6+;b7+;y2+;y4+;y6+;Y0+;Y0+;Y1+;Y1+;Y2+;Y4+;	b7+;Y0+;Y0+;Y1+;	No
MS2.14215.14215.3.1.dta	3310.4	958.557	3	TPLTAJITK	-	2351.85	5-4-1-0-3	6,	6	0.25067	9	0.10971	0.36364	4.79306	1.74295	b2+;b3+;b4+;b5+;b6+;b7+;y2+;y4+;y6+;Y0+;Y0+;Y1+;Y1+;Y2+;Y4+;	b7+;Y0+;Y0+;Y1+;	No
MS2.7320.7320.2.0.dta	2634.05	1189.51	2	EEQYJSTYR	-	1444.53	3-4-0-0-1	5,	7	0.3261	6	0.08537	0.31896	5.45862	1.74109	b3+;b4+;y1+;y2+;y3+;y4+;Y0+;Y0+;Y1+;Y1+;Y2+;Y3+;Y4+;	y1+;Y0+;Y1+;Y1+;Y2+;	Yes	1	1	1
MS2.36797.36797.4.1.dta	5124.27	3413.63	4	SLGNVJFTVSAEALESQELCGTEVPSVPEHGR	20,Carbamidomethyl[C];	1710.6	5-3-1-0-0	6,	0	0	9	0.49554	0.29995	5.77352	1.73175	b2+;b4+;b5+;y2+;y3+;y5+;y8+;y9+;y12+;	y2+;y3+;y5+;y8+;y9+;y12+;	No
MS2.28941.28941.5.0.dta	4359	2695.39	5	MVSHHJLTTGATLINEQWLLTTAK	1,Oxidation[M];	1663.61	4-5-0-0-0	6,	0	0	11	0.40354	0.27118	6.37541	1.72886	y1+;y2+;y3+;y4+;y5+;y6+;y7+;y8+;y9+;y10+;y11+;	y2+;y3+;y4+;y5+;y6+;y7+;y10+;	No
MS2.4397.4397.2.0.dta	2501.04	1284.62	2	YKJNSDISSTR	-	1216.42	5-2-0-0-0	3,	3	0.25936	4	0.17576	0.28641	6.02232	1.72488	y1+;y4+;y5+;y9+;Y0+;Y1+;Y1+;	y4+;y5+;y9+;Y0+;Y1+;Y1+;	No
MS2.3499.3499.3.1.dta	3513.33	796.347	3	NEEYJK	-	2716.98	6-5-1-0-3	5,	5	0.33041	4	0.12378	0.35144	4.87333	1.71269	b2+;b3+;y2+;y4+;Y0+;Y0+;Y1+;Y1+;Y2+;	b2+;b3+;Y0+;Y1+;	No
MS2.3499.3499.3.0.dta	3512.32	796.347	3	NEEYJK	-	2715.96	6-5-2-0-1	5,	5	0.33041	4	0.12378	0.35144	4.87333	1.71269	b2+;b3+;y2+;y4+;Y0+;Y0+;Y1+;Y1+;Y2+;	b2+;b3+;Y0+;Y1+;	Yes	1	1	1
MS2.35892.35892.5.1.dta	5328.33	3413.63	5	SLGNVJFTVSAEALESQELCGTEVPSVPEHGR	20,Carbamidomethyl[C];	1914.7	5-4-0-0-2	6,	0	0	8	0.48829	0.29542	5.77352	1.70563	y1+;y2+;y3+;y5+;y8+;y9+;y12+;y13+;	y2+;y3+;y5+;y8+;y9+;y13+;	Yes	3	1	1
MS2.14029.14029.3.0.dta	2764.12	1157.52	3	EEQFJSTFR	-	1606.59	4-4-0-0-1	5,	7	0.37441	3	0.04432	0.28018	6.07744	1.70276	y1+;y3+;y4+;Y0+;Y0+;Y1+;Y1+;Y2+;Y3+;Y4+;	y1+;Y0+;Y1+;Y1+;Y3+;Y4+;	Yes	3	1	1
MS2.29618.29618.4.3.dta	3709.7	1795.01	4	VVLHPJYSQVDIGLIK	-	1914.7	5-4-0-0-2	6,	13	0.11525	16	0.20519	0.3725	4.55026	1.69499	b2+;b3+;b4+;b7+;b10+;b11+;y1+;y2+;y3+;y5+;y6+;y7+;y8+;y9+;y10+;y12+;Y0+;Y0+;Y1+;Y0++;Y0++;Y1++;Y1++;Y2++;Y2++;Y3++;Y4++;Y4++;Y5++;	b4+;y2+;y5+;Y1++;	No
MS2.29618.29618.4.0.dta	3708.7	1795.01	4	VVLHPJYSQVDIGLIK	-	1913.68	5-4-1-0-0	6,	13	0.11525	16	0.20519	0.3725	4.55026	1.69499	b2+;b3+;b4+;b7+;b10+;b11+;y1+;y2+;y3+;y5+;y6+;y7+;y8+;y9+;y10+;y12+;Y0+;Y0+;Y1+;Y0++;Y0++;Y1++;Y1++;Y2++;Y2++;Y3++;Y4++;Y4++;Y5++;	b4+;y2+;y5+;Y1++;	Yes	1	1	1
MS2.22555.22555.4.0.dta	4414.82	2355.07	4	GLTFQQJASSMCVPDQDTAIR	11,Oxidation[M];12,Carbamidomethyl[C];	2059.73	5-4-1-0-1	7,	0	0	17	0.45591	0.3722	4.55026	1.6936	b3+;b5+;b6+;b8+;y1+;y2+;y3+;y4+;y5+;y6+;y7+;y8+;y9+;y10+;y11+;y12+;y13+;	y1+;y4+;y6+;y8+;	Yes	2	1	1
MS2.4669.4669.3.2.dta	3303.35	1284.62	3	YKJNSDISSTR	-	2018.71	6-3-1-0-1	3,	10	0.25853	10	0.14456	0.36952	4.58043	1.69255	b6+;y1+;y2+;y3+;y4+;y5+;y6+;y7+;y8+;y9+;Y0+;Y0+;Y1+;Y1+;Y2+;Y3+;Y0++;Y0++;Y1++;Y2++;	y5+;Y0+;Y1+;Y1++;	Yes	1	1	1
MS2.34743.34743.4.0.dta	4758.15	3541.72	4	SLGNVJFTVSAEALESQELCGTEVPSVPEHGRK	20,Carbamidomethyl[C];	1216.42	5-2-0-0-0	6,	0	0	14	0.45387	0.32641	5.18431	1.69219	b2+;b3+;b4+;b5+;b7+;y3+;y4+;y6+;y8+;y9+;y10+;y11+;y13+;y14+;	b2+;y4+;y6+;y9+;y10+;	No
MS2.36798.36798.4.1.dta	5287.3	3413.63	4	SLGNVJFTVSAEALESQELCGTEVPSVPEHGR	20,Carbamidomethyl[C];	1873.67	6-3-0-0-2	6,	0	0	10	0.54986	0.32597	5.17648	1.68737	b2+;b4+;b5+;b7+;y2+;y3+;y5+;y8+;y9+;y10+;	y2+;y3+;y5+;y8+;y9+;	No
MS2.38119.38119.4.1.dta	4758.14	3541.72	4	SLGNVJFTVSAEALESQELCGTEVPSVPEHGRK	20,Carbamidomethyl[C];	1216.42	5-2-0-0-0	6,	1	0.02356	8	0.47077	0.29171	5.78195	1.68666	b2+;b5+;y3+;y4+;y6+;y9+;y10+;y13+;Y0++;	y4+;y6+;y9+;y10+;y13+;Y0++;	No
MS2.34268.34268.4.0.dta	4979.22	3413.63	4	SLGNVJFTVSAEALESQELCGTEVPSVPEHGR	20,Carbamidomethyl[C];	1565.56	5-3-0-0-1	6,	0	0	13	0.45372	0.32411	5.17648	1.67774	b2+;b4+;b5+;b7+;y2+;y3+;y6+;y8+;y9+;y10+;y12+;y13+;y14+;	y2+;y3+;y8+;y9+;y12+;	No
MS2.7246.7246.3.0.dta	3161.24	1189.51	3	EEQYJSTYR	-	1971.72	5-5-0-0-1	5,	7	0.30531	6	0.07827	0.30705	5.45862	1.67609	b3+;b6+;y1+;y2+;y3+;y4+;Y0+;Y0+;Y1+;Y1+;Y2+;Y2+;Y3+;	y1+;Y0+;Y0+;Y1+;Y2+;	Yes	1	1	1
MS2.32586.32586.4.1.dta	4221.94	1780.02	4	LVPVPITJATLDQITGK	-	2441.88	7-5-0-0-2	8,	4	0.06381	14	0.21517	0.31488	5.3185	1.67471	b2+;b3+;b4+;y3+;y4+;y5+;y6+;y7+;y8+;y9+;y10+;y11+;y13+;y15+;Y0+;Y0+;Y1+;Y1+;	b2+;b3+;y3+;y13+;Y1+;	Yes	1	1	1
MS2.25618.25618.3.0.dta	3467.52	1593.83	3	SIJTTNVMGTSLTVR	-	1873.67	6-3-0-0-2	3,	4	0.13847	14	0.23446	0.35712	4.66539	1.66609	b2+;b4+;b7+;y1+;y3+;y4+;y5+;y6+;y7+;y8+;y9+;y10+;y11+;y12+;Y0+;Y0+;Y1+;Y1+;	y7+;y8+;Y0+;Y1+;	Yes	1	1	1
MS2.3941.3941.3.2.dta	3367.26	796.347	3	NEEYJK	-	2570.93	6-5-1-0-2	5,	6	0.19252	7	0.08774	0.34064	4.87333	1.66004	b2+;b3+;b4+;b5+;y2+;y3+;y4+;Y0+;Y0+;Y1+;Y2+;Y3+;Y4+;	b2+;b3+;Y0+;Y1+;	No
MS2.3941.3941.3.3.dta	3368.27	796.347	3	NEEYJK	-	2571.95	6-5-0-0-4	5,	6	0.19252	7	0.08774	0.34064	4.87333	1.66004	b2+;b3+;b4+;b5+;y2+;y3+;y4+;Y0+;Y0+;Y1+;Y2+;Y3+;Y4+;	b2+;b3+;Y0+;Y1+;	Yes	1	1	1
MS2.3941.3941.3.1.dta	3366.26	796.347	3	NEEYJK	-	2569.9	6-5-2-0-0	5,	6	0.19252	7	0.08774	0.34064	4.87333	1.66004	b2+;b3+;b4+;b5+;y2+;y3+;y4+;Y0+;Y0+;Y1+;Y2+;Y3+;Y4+;	b2+;b3+;Y0+;Y1+;	Yes	1	1	1
MS2.26179.26179.4.3.dta	4634.93	2339.08	4	GLTFQQJASSMCVPDQDTAIR	12,Carbamidomethyl[C];	2295.82	7-5-0-0-1	7,	0	0	13	0.44676	0.36492	4.543	1.65784	b3+;b8+;y1+;y3+;y4+;y5+;y6+;y7+;y8+;y9+;y10+;y11+;y12+;	y1+;y4+;y6+;y8+;	No
MS2.4039.4039.3.2.dta	3805.43	796.347	3	NEEYJK	-	3009.07	8-7-1-0-0	5,	5	0.21318	6	0.10714	0.33906	4.87333	1.65234	b2+;b3+;b4+;y2+;y3+;y4+;Y0+;Y0+;Y1+;Y1+;Y3+;	b2+;b3+;Y0+;Y1+;	Yes	1	1	1
MS2.4039.4039.3.1.dta	3804.42	796.347	3	NEEYJK	-	3008.08	6-5-2-0-3	5,	5	0.21318	6	0.10714	0.33906	4.87333	1.65234	b2+;b3+;b4+;y2+;y3+;y4+;Y0+;Y0+;Y1+;Y1+;Y3+;	b2+;b3+;Y0+;Y1+;	Yes	1	1	1
MS2.4039.4039.3.0.dta	3803.43	796.347	3	NEEYJK	-	3007.06	6-5-3-0-1	5,	5	0.21318	6	0.10714	0.33906	4.87333	1.65234	b2+;b3+;b4+;y2+;y3+;y4+;Y0+;Y0+;Y1+;Y1+;Y3+;	b2+;b3+;Y0+;Y1+;	Yes	1	1	1
MS2.4646.4646.3.0.dta	3141.29	1284.62	3	YKJNSDISSTR	-	1856.66	5-3-1-0-1	3,	5	0.14294	12	0.14899	0.34654	4.74648	1.64483	b3+;b4+;b6+;y1+;y2+;y3+;y4+;y5+;y6+;y7+;y8+;y9+;Y0+;Y0+;Y1+;Y1+;Y2+;	y4+;y5+;Y0+;Y1+;	Yes	1	1	1
MS2.4646.4646.3.1.dta	3142.29	1284.62	3	YKJNSDISSTR	-	1857.68	5-3-0-0-3	3,	5	0.14294	12	0.14899	0.34654	4.74648	1.64483	b3+;b4+;b6+;y1+;y2+;y3+;y4+;y5+;y6+;y7+;y8+;y9+;Y0+;Y0+;Y1+;Y1+;Y2+;	y4+;y5+;Y0+;Y1+;	No
MS2.18402.18402.5.1.dta	4406.77	2339.08	5	GLTFQQJASSMCVPDQDTAIR	12,Carbamidomethyl[C];	2067.71	9-3-0-0-0	7,	0	0	7	0.37673	0.28421	5.78195	1.64328	y1+;y3+;y4+;y5+;y6+;y7+;y8+;	y1+;y4+;y5+;y6+;y7+;y8+;	No
MS2.7060.7060.3.0.dta	2796.11	1189.51	3	EEQYJSTYR	-	1606.59	4-4-0-0-1	5,	7	0.34293	5	0.0663	0.29953	5.45862	1.63503	b3+;y1+;y2+;y3+;y4+;Y0+;Y0+;Y1+;Y1+;Y3+;Y4+;Y4+;	y1+;Y0+;Y1+;Y1+;Y4+;	Yes	1	1	1
MS2.4867.4867.3.1.dta	3345.38	1284.62	3	YKJNSDISSTR	-	2060.76	5-4-0-0-3	3,	6	0.18447	8	0.16512	0.34311	4.74648	1.62856	y1+;y3+;y4+;y5+;y6+;y7+;y8+;y9+;Y0+;Y0+;Y1+;Y1+;Y2+;Y3+;	y4+;y5+;Y0+;Y1+;	No
MS2.4867.4867.3.0.dta	3344.37	1284.62	3	YKJNSDISSTR	-	2059.73	5-4-1-0-1	3,	6	0.18447	8	0.16512	0.34311	4.74648	1.62856	y1+;y3+;y4+;y5+;y6+;y7+;y8+;y9+;Y0+;Y0+;Y1+;Y1+;Y2+;Y3+;	y4+;y5+;Y0+;Y1+;	Yes	1	1	1
MS2.32720.32720.4.1.dta	4075.88	1780.02	4	LVPVPITJATLDQITGK	-	2295.82	7-5-0-0-1	8,	2	0.04762	15	0.20916	0.30471	5.3185	1.62058	b2+;b3+;b4+;b14+;y3+;y4+;y5+;y6+;y7+;y8+;y9+;y10+;y11+;y13+;y15+;Y0+;Y1+;	b2+;b3+;y13+;Y0+;Y1+;	Yes	1	1	1
MS2.37263.37263.4.0.dta	5182.29	3413.63	4	SLGNVJFTVSAEALESQELCGTEVPSVPEHGR	20,Carbamidomethyl[C];	1768.64	5-4-0-0-1	6,	0	0	8	0.55667	0.31271	5.17648	1.61872	b7+;y2+;y3+;y5+;y8+;y9+;y10+;y12+;	b7+;y3+;y5+;y8+;y9+;	No
MS2.25467.25467.3.0.dta	4472.82	2339.08	3	GLTFQQJASSMCVPDQDTAIR	12,Carbamidomethyl[C];	2133.77	6-5-0-0-1	7,	0	0	5	0.46927	0.31177	5.18431	1.6163	y1+;y4+;y6+;y8+;y10+;	y1+;y4+;y6+;y8+;y10+;	No
MS2.3571.3571.3.1.dta	3383.29	796.347	3	NEEYJK	-	2586.92	7-5-1-0-1	5,	6	0.18958	5	0.13532	0.33136	4.87333	1.61482	b2+;b3+;b4+;y2+;y3+;Y0+;Y0+;Y1+;Y2+;Y3+;Y4+;	b2+;b3+;Y0+;Y0+;	Yes	1	1	1
MS2.3571.3571.3.2.dta	3384.29	796.347	3	NEEYJK	-	2587.94	7-5-0-0-3	5,	6	0.18958	5	0.13532	0.33136	4.87333	1.61482	b2+;b3+;b4+;y2+;y3+;Y0+;Y0+;Y1+;Y2+;Y3+;Y4+;	b2+;b3+;Y0+;Y0+;	No
MS2.34030.34030.5.2.dta	5287.31	3413.63	5	SLGNVJFTVSAEALESQELCGTEVPSVPEHGR	20,Carbamidomethyl[C];	1873.67	6-3-0-0-2	6,	0	0	10	0.51552	0.311	5.17648	1.6099	b2+;b4+;b5+;y1+;y3+;y5+;y8+;y9+;y10+;y12+;	y3+;y5+;y8+;y9+;y12+;	No
MS2.34030.34030.5.0.dta	5286.31	3413.63	5	SLGNVJFTVSAEALESQELCGTEVPSVPEHGR	20,Carbamidomethyl[C];	1872.65	6-3-1-0-0	6,	0	0	10	0.51552	0.311	5.17648	1.6099	b2+;b4+;b5+;y1+;y3+;y5+;y8+;y9+;y10+;y12+;	y3+;y5+;y8+;y9+;y12+;	Yes	3	1	1
MS2.38885.38885.4.1.dta	4630.07	3413.63	4	SLGNVJFTVSAEALESQELCGTEVPSVPEHGR	20,Carbamidomethyl[C];	1216.42	5-2-0-0-0	6,	0	0	8	0.56116	0.31086	5.17648	1.60917	b2+;b4+;y2+;y3+;y5+;y8+;y9+;y12+;	y3+;y5+;y8+;y9+;y12+;	No
MS2.33547.33547.3.0.dta	4630.07	3413.63	3	SLGNVJFTVSAEALESQELCGTEVPSVPEHGR	20,Carbamidomethyl[C];	1216.42	5-2-0-0-0	6,	0	0	8	0.54638	0.30984	5.17648	1.60389	b4+;y2+;y3+;y5+;y6+;y8+;y9+;y10+;	b4+;y3+;y5+;y8+;y9+;	No
MS2.4348.4348.3.3.dta	3054.21	993.46	3	JNSDISSTR	-	2060.76	5-4-0-0-3	1,	7	0.08221	8	0.18915	0.33458	4.79306	1.60367	y1+;y2+;y3+;y4+;y5+;y6+;y7+;y8+;Y0+;Y0+;Y1+;Y1+;Y3+;Y4+;Y5+;	y4+;y5+;Y0+;Y1+;	Yes	1	1	1
MS2.36935.36935.4.1.dta	4758.16	3541.72	4	SLGNVJFTVSAEALESQELCGTEVPSVPEHGRK	20,Carbamidomethyl[C];	1216.42	5-2-0-0-0	6,	0	0	12	0.44631	0.30878	5.18431	1.60082	b2+;b4+;b5+;y3+;y4+;y6+;y7+;y8+;y9+;y13+;y14+;y15+;	b2+;y3+;y4+;y6+;y9+;	Yes	2	1	1
MS2.4016.4016.3.1.dta	3384.28	796.347	3	NEEYJK	-	2587.94	7-5-0-0-3	5,	7	0.18829	6	0.07271	0.32752	4.87333	1.59609	b2+;b3+;b4+;y2+;y3+;y4+;Y0+;Y0+;Y1+;Y1+;Y2+;Y3+;Y4+;	b2+;b3+;Y0+;Y1+;	No
MS2.4016.4016.3.0.dta	3383.29	796.347	3	NEEYJK	-	2586.92	7-5-1-0-1	5,	7	0.18829	6	0.07271	0.32752	4.87333	1.59609	b2+;b3+;b4+;y2+;y3+;y4+;Y0+;Y0+;Y1+;Y1+;Y2+;Y3+;Y4+;	b2+;b3+;Y0+;Y1+;	Yes	1	1	1
MS2.13112.13112.3.0.dta	2934.19	1555.71	3	THTJISESHPJATF	-	1378.48	6-2-0-0-0	11,	2	0.05643	5	0.43648	0.27567	5.77352	1.59159	b2+;b3+;b5+;b9+;y9+;Y1+;Y0++;	b2+;b3+;b5+;b9+;y9+;Y1+;	No
MS2.36226.36226.4.4.dta	4995.2	3413.63	4	SLGNVJFTVSAEALESQELCGTEVPSVPEHGR	20,Carbamidomethyl[C];	1581.56	6-3-0-0-0	6,	0	0	8	0.52638	0.3058	5.17648	1.58296	b7+;y2+;y3+;y5+;y6+;y7+;y8+;y9+;	y2+;y3+;y5+;y8+;y9+;	No
MS2.31110.31110.3.1.dta	4016.82	1795.01	3	VVLHPJYSQVDIGLIK	-	2221.79	6-4-1-0-1	6,	12	0.05883	24	0.21868	0.41158	3.84588	1.58287	b2+;b3+;b4+;b5+;b6+;b7+;b8+;b9+;b10+;b11+;b12+;b13+;b14+;b15+;y1+;y2+;y3+;y5+;y6+;y7+;y8+;y9+;y10+;y12+;Y0+;Y1+;Y1+;Y0++;Y0++;Y1++;Y2++;Y2++;Y3++;Y4++;Y4++;Y5++;	b4+;y2+;y5+;	Yes	1	1	1
MS2.19174.19174.3.0.dta	4658.93	2339.08	3	GLTFQQJASSMCVPDQDTAIR	12,Carbamidomethyl[C];	2319.84	5-6-1-0-0	7,	0	0	14	0.41227	0.34653	4.543	1.57428	b3+;b5+;b6+;b8+;b9+;y1+;y2+;y3+;y4+;y6+;y7+;y8+;y9+;y10+;	y1+;y4+;y6+;y8+;	No
MS2.19574.19574.4.2.dta	4310.79	2339.08	4	GLTFQQJASSMCVPDQDTAIR	12,Carbamidomethyl[C];	1971.72	5-5-0-0-1	7,	0	0	12	0.45594	0.34551	4.543	1.56967	b3+;b6+;b8+;y1+;y2+;y4+;y5+;y6+;y7+;y8+;y9+;y10+;	y1+;y4+;y6+;y8+;	No
MS2.4266.4266.3.2.dta	2851.13	993.46	3	JNSDISSTR	-	1857.68	5-3-0-0-3	1,	5	0.28426	4	0.08673	0.28747	5.45862	1.56917	y1+;y4+;y5+;y7+;Y0+;Y0+;Y1+;Y1+;Y2+;	y5+;Y0+;Y0+;Y1+;Y1+;	No
MS2.4266.4266.3.1.dta	2850.12	993.46	3	JNSDISSTR	-	1856.66	5-3-1-0-1	1,	5	0.28426	4	0.08673	0.28747	5.45862	1.56917	y1+;y4+;y5+;y7+;Y0+;Y0+;Y1+;Y1+;Y2+;	y5+;Y0+;Y0+;Y1+;Y1+;	Yes	3	1	1
MS2.23699.23699.3.1.dta	4722.94	2339.08	3	GLTFQQJASSMCVPDQDTAIR	12,Carbamidomethyl[C];	2383.84	7-4-1-0-1	7,	0	0	10	0.46991	0.34537	4.543	1.56903	b3+;b8+;y1+;y3+;y4+;y5+;y6+;y8+;y9+;y10+;	y1+;y4+;y6+;y8+;	No
MS2.23699.23699.3.2.dta	4723.95	2339.08	3	GLTFQQJASSMCVPDQDTAIR	12,Carbamidomethyl[C];	2384.86	7-4-0-0-3	7,	0	0	10	0.46991	0.34537	4.543	1.56903	b3+;b8+;y1+;y3+;y4+;y5+;y6+;y8+;y9+;y10+;	y1+;y4+;y6+;y8+;	No
MS2.6862.6862.2.0.dta	2796.11	1189.51	2	EEQYJSTYR	-	1606.59	4-4-0-0-1	5,	7	0.30822	4	0.07679	0.28473	5.45862	1.55421	b3+;y1+;y2+;y4+;Y0+;Y0+;Y1+;Y1+;Y2+;Y3+;Y4+;	y1+;Y0+;Y1+;Y1+;Y2+;	No
MS2.13840.13840.2.0.dta	2926.17	1157.52	2	EEQFJSTFR	-	1768.64	5-4-0-0-1	5,	7	0.24914	5	0.09188	0.28458	5.45862	1.55339	b3+;y1+;y2+;y3+;y4+;Y0+;Y0+;Y1+;Y1+;Y2+;Y3+;Y4+;	b3+;y1+;Y0+;Y0+;Y1+;	Yes	3	1	1
MS2.35248.35248.4.1.dta	4792.11	3413.63	4	SLGNVJFTVSAEALESQELCGTEVPSVPEHGR	20,Carbamidomethyl[C];	1378.48	6-2-0-0-0	6,	0	0	6	0.59722	0.29797	5.17648	1.54246	b2+;y1+;y2+;y3+;y5+;y8+;	b2+;y2+;y3+;y5+;y8+;	No
MS2.24487.24487.3.0.dta	2810.26	1593.83	3	SIJTTNVMGTSLTVR	-	1216.42	5-2-0-0-0	3,	1	0.03688	7	0.33214	0.25983	5.92645	1.53985	y1+;y3+;y5+;y7+;y8+;y9+;y10+;Y0+;	y3+;y7+;y8+;y9+;y10+;Y0+;	Yes	2	1	1
MS2.29616.29616.3.1.dta	3709.71	1795.01	3	VVLHPJYSQVDIGLIK	-	1914.7	5-4-0-0-2	6,	10	0.04989	23	0.22883	0.39999	3.84588	1.5383	b2+;b3+;b4+;b5+;b6+;b7+;b9+;b10+;b11+;b12+;b13+;b14+;y1+;y2+;y3+;y5+;y6+;y7+;y8+;y9+;y10+;y12+;y13+;Y0+;Y1+;Y1+;Y0++;Y0++;Y1++;Y2++;Y3++;Y4++;Y5++;	b4+;y2+;y5+;	No
MS2.29616.29616.3.0.dta	3708.71	1795.01	3	VVLHPJYSQVDIGLIK	-	1913.68	5-4-1-0-0	6,	10	0.04989	23	0.22883	0.39999	3.84588	1.5383	b2+;b3+;b4+;b5+;b6+;b7+;b9+;b10+;b11+;b12+;b13+;b14+;y1+;y2+;y3+;y5+;y6+;y7+;y8+;y9+;y10+;y12+;y13+;Y0+;Y1+;Y1+;Y0++;Y0++;Y1++;Y2++;Y3++;Y4++;Y5++;	b4+;y2+;y5+;	Yes	1	1	1
MS2.4311.4311.3.0.dta	2542.01	993.46	3	JNSDISSTR	-	1548.54	4-3-1-0-0	1,	3	0.2974	3	0.14521	0.27956	5.45862	1.52601	y1+;y4+;y5+;Y0+;Y1+;Y1+;	y1+;y4+;y5+;Y0+;Y1+;	No
MS2.4311.4311.3.1.dta	2543.02	993.46	3	JNSDISSTR	-	1549.57	4-3-0-0-2	1,	3	0.2974	3	0.14521	0.27956	5.45862	1.52601	y1+;y4+;y5+;Y0+;Y1+;Y1+;	y1+;y4+;y5+;Y0+;Y1+;	No
MS2.37114.37114.4.0.dta	5327.31	3413.63	4	SLGNVJFTVSAEALESQELCGTEVPSVPEHGR	20,Carbamidomethyl[C];	1913.68	5-4-1-0-0	6,	0	0	6	0.54894	0.29357	5.17648	1.51967	y2+;y3+;y5+;y8+;y14+;y17+;	y2+;y3+;y5+;y8+;y14+;	No
MS2.5417.5417.3.1.dta	3345.36	1284.62	3	YKJNSDISSTR	-	2060.76	5-4-0-0-3	3,	4	0.11552	8	0.20894	0.31854	4.74648	1.51192	y1+;y3+;y4+;y5+;y6+;y7+;y8+;y9+;Y0+;Y0+;Y1+;Y1+;	y5+;y7+;Y0+;Y1+;	No
MS2.5417.5417.3.0.dta	3344.37	1284.62	3	YKJNSDISSTR	-	2059.73	5-4-1-0-1	3,	4	0.11552	8	0.20894	0.31854	4.74648	1.51192	y1+;y3+;y4+;y5+;y6+;y7+;y8+;y9+;Y0+;Y0+;Y1+;Y1+;	y5+;y7+;Y0+;Y1+;	Yes	1	1	1
MS2.3990.3990.3.1.dta	3514.33	796.347	3	NEEYJK	-	2717.98	8-7-0-0-0	5,	4	0.18832	6	0.09265	0.30988	4.87333	1.51013	b2+;b3+;b4+;y2+;y3+;y4+;Y0+;Y0+;Y1+;Y2+;	b2+;b3+;Y0+;Y1+;	Yes	1	1	1
MS2.3990.3990.3.0.dta	3513.33	796.347	3	NEEYJK	-	2716.98	6-5-1-0-3	5,	4	0.18832	6	0.09265	0.30988	4.87333	1.51013	b2+;b3+;b4+;y2+;y3+;y4+;Y0+;Y0+;Y1+;Y2+;	b2+;b3+;Y0+;Y1+;	Yes	1	1	1
MS2.32423.32423.4.1.dta	4593.11	2679.39	4	MVSHHJLTTGATLINEQWLLTTAK	-	1913.68	5-4-1-0-0	6,	3	0.02659	14	0.2949	0.28945	5.20854	1.50759	b4+;b5+;b6+;b7+;y2+;y3+;y4+;y5+;y6+;y8+;y9+;y10+;y11+;y13+;Y0++;Y0++;Y1++;	b5+;y3+;y4+;y5+;y6+;	Yes	2	1	1
MS2.32423.32423.4.2.dta	4594.1	2679.39	4	MVSHHJLTTGATLINEQWLLTTAK	-	1914.7	5-4-0-0-2	6,	3	0.02659	14	0.2949	0.28945	5.20854	1.50759	b4+;b5+;b6+;b7+;y2+;y3+;y4+;y5+;y6+;y8+;y9+;y10+;y11+;y13+;Y0++;Y0++;Y1++;	b5+;y3+;y4+;y5+;y6+;	No
MS2.28061.28061.4.0.dta	4910.03	2339.08	4	GLTFQQJASSMCVPDQDTAIR	12,Carbamidomethyl[C];	2570.93	6-5-1-0-2	7,	0	0	21	0.36725	0.3924	3.83944	1.50658	b3+;b5+;b6+;b8+;b9+;b13+;y1+;y3+;y4+;y5+;y6+;y7+;y8+;y9+;y10+;y11+;y12+;y13+;y14+;y15+;y16+;	y4+;y6+;y8+;	No
MS2.28061.28061.4.1.dta	4911.03	2339.08	4	GLTFQQJASSMCVPDQDTAIR	12,Carbamidomethyl[C];	2571.95	6-5-0-0-4	7,	0	0	21	0.36725	0.3924	3.83944	1.50658	b3+;b5+;b6+;b8+;b9+;b13+;y1+;y3+;y4+;y5+;y6+;y7+;y8+;y9+;y10+;y11+;y12+;y13+;y14+;y15+;y16+;	y4+;y6+;y8+;	No
MS2.32061.32061.3.2.dta	4658.04	1795.01	3	VVLHPJYSQVDIGLIK	-	2863.04	6-5-1-0-4	6,	6	0.05919	15	0.23669	0.33091	4.55026	1.50571	b2+;b3+;b4+;b6+;b9+;b11+;y1+;y2+;y3+;y4+;y5+;y6+;y9+;y10+;y12+;Y0+;Y1+;Y0++;Y1++;Y2++;Y4++;	b4+;y4+;y5+;Y1++;	Yes	1	1	1
MS2.32061.32061.3.1.dta	4657.04	1795.01	3	VVLHPJYSQVDIGLIK	-	2862.02	6-5-2-0-2	6,	6	0.05919	15	0.23669	0.33091	4.55026	1.50571	b2+;b3+;b4+;b6+;b9+;b11+;y1+;y2+;y3+;y4+;y5+;y6+;y9+;y10+;y12+;Y0+;Y1+;Y0++;Y1++;Y2++;Y4++;	b4+;y4+;y5+;Y1++;	No
MS2.32061.32061.3.0.dta	4656.05	1795.01	3	VVLHPJYSQVDIGLIK	-	2861	6-5-3-0-0	6,	6	0.05919	15	0.23669	0.33091	4.55026	1.50571	b2+;b3+;b4+;b6+;b9+;b11+;y1+;y2+;y3+;y4+;y5+;y6+;y9+;y10+;y12+;Y0+;Y1+;Y0++;Y1++;Y2++;Y4++;	b4+;y4+;y5+;Y1++;	Yes	3	1	1
MS2.3610.3610.3.1.dta	3076.17	796.347	3	NEEYJK	-	2279.83	6-5-0-0-2	5,	5	0.17637	6	0.08609	0.30816	4.87333	1.50176	b2+;b3+;b4+;y2+;y3+;y4+;Y0+;Y0+;Y1+;Y2+;Y4+;	b2+;b3+;Y0+;Y1+;	No
MS2.3610.3610.3.0.dta	3075.16	796.347	3	NEEYJK	-	2278.81	6-5-1-0-0	5,	5	0.17637	6	0.08609	0.30816	4.87333	1.50176	b2+;b3+;b4+;y2+;y3+;y4+;Y0+;Y0+;Y1+;Y2+;Y4+;	b2+;b3+;Y0+;Y1+;	Yes	1	1	1
MS2.28747.28747.3.0.dta	4049.78	1753.93	3	CANLVPVPITJATLDR	1,Carbamidomethyl[C];	2295.82	7-5-0-0-1	11,	1	0.04183	11	0.34239	0.28133	5.32881	1.49916	b2+;b3+;b4+;b5+;b6+;y1+;y3+;y4+;y5+;y9+;y11+;Y1+;	b2+;b3+;b4+;y1+;Y1+;	No
MS2.12941.12941.3.1.dta	3222.38	958.557	3	TPLTAJITK	-	2263.83	5-5-0-0-3	6,	5	0.24718	9	0.1251	0.36863	4.06094	1.49697	b3+;b4+;b5+;b6+;b7+;b8+;y4+;y5+;y6+;Y0+;Y0+;Y1+;Y1+;Y2+;	b7+;Y0+;Y1+;	No
MS2.12941.12941.3.0.dta	3221.38	958.557	3	TPLTAJITK	-	2262.81	5-5-1-0-1	6,	5	0.24718	9	0.1251	0.36863	4.06094	1.49697	b3+;b4+;b5+;b6+;b7+;b8+;y4+;y5+;y6+;Y0+;Y0+;Y1+;Y1+;Y2+;	b7+;Y0+;Y1+;	Yes	1	1	1
MS2.19138.19138.4.0.dta	4658.95	2339.08	4	GLTFQQJASSMCVPDQDTAIR	12,Carbamidomethyl[C];	2319.84	5-6-1-0-0	7,	0	0	15	0.36054	0.32938	4.543	1.4964	b3+;b4+;b5+;b8+;b9+;y1+;y2+;y3+;y4+;y5+;y6+;y7+;y8+;y9+;y10+;	y1+;y4+;y6+;y8+;	No
MS2.28605.28605.3.0.dta	4331.82	1744.89	3	YFTPJKTEDTIFLR	-	2586.92	7-5-1-0-1	5,	5	0.11342	9	0.19336	0.28667	5.20034	1.49079	b2+;y1+;y3+;y5+;y6+;y7+;y8+;y9+;y11+;Y0+;Y1+;Y0++;Y0++;Y1++;	y5+;y8+;Y1+;Y0++;Y1++;	Yes	1	1	1
MS2.33796.33796.5.0.dta	4962.2	3413.63	5	SLGNVJFTVSAEALESQELCGTEVPSVPEHGR	20,Carbamidomethyl[C];	1548.54	4-3-1-0-0	6,	0	0	14	0.43987	0.32832	4.53585	1.48923	b2+;b4+;b5+;y1+;y2+;y3+;y6+;y7+;y8+;y9+;y10+;y12+;y13+;y14+;	y3+;y8+;y9+;y12+;	Yes	2	1	1
MS2.33796.33796.5.1.dta	4963.21	3413.63	5	SLGNVJFTVSAEALESQELCGTEVPSVPEHGR	20,Carbamidomethyl[C];	1549.57	4-3-0-0-2	6,	0	0	14	0.43987	0.32832	4.53585	1.48923	b2+;b4+;b5+;y1+;y2+;y3+;y6+;y7+;y8+;y9+;y10+;y12+;y13+;y14+;	y3+;y8+;y9+;y12+;	No
MS2.4165.4165.4.2.dta	2858.08	993.46	4	JNSDISSTR	-	1864.63	9-2-0-0-0	1,	0	0	7	0.27711	0.27201	5.45862	1.48481	y1+;y2+;y3+;y5+;y6+;y7+;y8+;	y1+;y3+;y5+;y6+;y7+;	No
MS2.4163.4163.3.0.dta	3657.36	796.347	3	NEEYJK	-	2861	6-5-3-0-0	5,	4	0.18734	6	0.08961	0.30444	4.87333	1.48365	b2+;b3+;b4+;y2+;y3+;y4+;Y0+;Y0+;Y1+;Y3+;	b2+;b3+;Y0+;Y1+;	Yes	1	1	1
MS2.4163.4163.3.2.dta	3659.37	796.347	3	NEEYJK	-	2863.04	6-5-1-0-4	5,	4	0.18734	6	0.08961	0.30444	4.87333	1.48365	b2+;b3+;b4+;y2+;y3+;y4+;Y0+;Y0+;Y1+;Y3+;	b2+;b3+;Y0+;Y1+;	Yes	1	1	1
MS2.4163.4163.3.1.dta	3658.36	796.347	3	NEEYJK	-	2862.02	6-5-2-0-2	5,	4	0.18734	6	0.08961	0.30444	4.87333	1.48365	b2+;b3+;b4+;y2+;y3+;y4+;Y0+;Y0+;Y1+;Y3+;	b2+;b3+;Y0+;Y1+;	No
MS2.26104.26104.3.0.dta	4415.82	2339.08	3	GLTFQQJASSMCVPDQDTAIR	12,Carbamidomethyl[C];	2076.75	6-4-0-0-2	7,	0	0	5	0.42903	0.28411	5.18431	1.47293	y1+;y4+;y5+;y6+;y8+;	y1+;y4+;y5+;y6+;y8+;	Yes	2	1	1
MS2.10321.10321.3.0.dta	2780.11	1173.52	3	EEQFJSTYR	-	1606.59	4-4-0-0-1	5,	7	0.41391	4	0.04985	0.30672	4.79306	1.47015	b3+;y1+;y2+;y4+;Y0+;Y0+;Y1+;Y1+;Y2+;Y3+;Y4+;	Y0+;Y0+;Y1+;Y4+;	Yes	3	1	1
MS2.4903.4903.4.1.dta	3547.45	1284.62	4	YKJNSDISSTR	-	2262.81	5-5-1-0-1	3,	15	0.20831	9	0.07223	0.3207	4.58043	1.46893	b3+;b7+;y3+;y4+;y5+;y6+;y7+;y8+;y9+;Y0+;Y0+;Y1+;Y1+;Y2+;Y2+;Y3+;Y3+;Y0++;Y0++;Y1++;Y1++;Y2++;Y2++;Y3++;	y5+;Y0+;Y1+;Y2+;	Yes	1	1	1
MS2.14173.14173.2.0.dta	2764.12	1157.52	2	EEQFJSTFR	-	1606.59	4-4-0-0-1	5,	7	0.30113	6	0.07314	0.30594	4.79306	1.46641	b3+;b7+;y1+;y2+;y3+;y4+;Y0+;Y0+;Y1+;Y1+;Y2+;Y3+;Y4+;	y1+;Y0+;Y0+;Y1+;	Yes	1	1	1
MS2.27082.27082.4.3.dta	4600.86	2355.07	4	GLTFQQJASSMCVPDQDTAIR	11,Oxidation[M];12,Carbamidomethyl[C];	2245.8	4-5-2-0-0	7,	0	0	10	0.4875	0.32225	4.55026	1.46634	b3+;y1+;y3+;y4+;y5+;y6+;y7+;y8+;y9+;y10+;	y1+;y4+;y6+;y8+;	No
MS2.18279.18279.3.0.dta	4367.83	2339.08	3	GLTFQQJASSMCVPDQDTAIR	12,Carbamidomethyl[C];	2028.74	5-6-0-0-0	7,	0	0	5	0.50731	0.32128	4.543	1.45959	y4+;y6+;y7+;y8+;y12+;	y4+;y6+;y7+;y8+;	No
MS2.37187.37187.4.1.dta	4979.21	3413.63	4	SLGNVJFTVSAEALESQELCGTEVPSVPEHGR	20,Carbamidomethyl[C];	1565.56	5-3-0-0-1	6,	0	0	7	0.49182	0.28086	5.17648	1.45387	b2+;y2+;y3+;y5+;y8+;y9+;y12+;	y2+;y3+;y5+;y8+;y9+;	No
MS2.26675.26675.3.2.dta	4439.81	2339.08	3	GLTFQQJASSMCVPDQDTAIR	12,Carbamidomethyl[C];	2100.76	4-5-1-0-1	7,	0	0	9	0.42258	0.31977	4.543	1.45272	y1+;y2+;y3+;y4+;y5+;y6+;y8+;y9+;y10+;	y1+;y4+;y6+;y8+;	No
MS2.37605.37605.4.0.dta	4758.16	3541.72	4	SLGNVJFTVSAEALESQELCGTEVPSVPEHGRK	20,Carbamidomethyl[C];	1216.42	5-2-0-0-0	6,	0	0	9	0.44708	0.27892	5.18431	1.44602	b2+;b4+;b5+;y3+;y4+;y6+;y9+;y10+;y14+;	b2+;b4+;b5+;y6+;y9+;	No
MS2.19574.19574.4.1.dta	4309.79	2355.07	4	GLTFQQJASSMCVPDQDTAIR	11,Oxidation[M];12,Carbamidomethyl[C];	1954.7	4-5-1-0-0	7,	0	0	12	0.45594	0.31764	4.55026	1.44533	b3+;b6+;b8+;y1+;y2+;y4+;y5+;y6+;y7+;y8+;y9+;y10+;	y1+;y4+;y6+;y8+;	No
MS2.4792.4792.3.0.dta	2979.24	1284.62	3	YKJNSDISSTR	-	1694.6	4-3-1-0-1	3,	6	0.15557	13	0.13712	0.35922	4.01971	1.44398	b3+;b4+;b6+;b7+;y1+;y2+;y3+;y4+;y5+;y6+;y7+;y8+;y9+;Y0+;Y0+;Y1+;Y1+;Y2+;Y3+;	y5+;Y0+;Y1+;	Yes	1	1	1
MS2.4792.4792.3.1.dta	2980.23	1284.62	3	YKJNSDISSTR	-	1695.62	4-3-0-0-3	3,	6	0.15557	13	0.13712	0.35922	4.01971	1.44398	b3+;b4+;b6+;b7+;y1+;y2+;y3+;y4+;y5+;y6+;y7+;y8+;y9+;Y0+;Y0+;Y1+;Y1+;Y2+;Y3+;	y5+;Y0+;Y1+;	No
MS2.3351.3351.3.1.dta	3158.24	952.448	3	RNEEYJK	-	2205.79	5-4-1-0-2	6,	8	0.34596	3	0.01434	0.29749	4.84496	1.4413	b3+;b4+;b6+;Y0+;Y0+;Y1+;Y1+;Y2+;Y3+;Y4+;Y5+;	Y1+;Y3+;Y4+;Y5+;	No
MS2.3351.3351.3.0.dta	3157.23	952.448	3	RNEEYJK	-	2204.77	5-4-2-0-0	6,	8	0.34596	3	0.01434	0.29749	4.84496	1.4413	b3+;b4+;b6+;Y0+;Y0+;Y1+;Y1+;Y2+;Y3+;Y4+;Y5+;	Y1+;Y3+;Y4+;Y5+;	Yes	3	1	1
MS2.3351.3351.3.2.dta	3159.24	952.448	3	RNEEYJK	-	2206.81	5-4-0-0-4	6,	8	0.34596	3	0.01434	0.29749	4.84496	1.4413	b3+;b4+;b6+;Y0+;Y0+;Y1+;Y1+;Y2+;Y3+;Y4+;Y5+;	Y1+;Y3+;Y4+;Y5+;	Yes	3	1	1
MS2.28275.28275.4.2.dta	4476.86	1744.89	4	YFTPJKTEDTIFLR	-	2731.96	7-5-2-0-0	5,	10	0.18675	10	0.13814	0.31412	4.55763	1.43166	b2+;b3+;y1+;y2+;y3+;y5+;y6+;y7+;y8+;y9+;Y0+;Y1+;Y1+;Y0++;Y0++;Y1++;Y1++;Y2++;Y3++;Y4++;	y5+;Y1+;Y0++;Y1++;	Yes	1	1	1
MS2.28275.28275.4.0.dta	4477.89	1744.89	4	YFTPJKTEDTIFLR	-	2732.98	7-5-1-0-2	5,	10	0.18675	10	0.13814	0.31412	4.55763	1.43166	b2+;b3+;y1+;y2+;y3+;y5+;y6+;y7+;y8+;y9+;Y0+;Y1+;Y1+;Y0++;Y0++;Y1++;Y1++;Y2++;Y3++;Y4++;	y5+;Y1+;Y0++;Y1++;	Yes	1	1	1
MS2.9595.9595.3.0.dta	3356.33	769.388	3	YFTPJK	-	2586.92	7-5-1-0-1	5,	7	0.30881	3	0.09346	0.34624	4.13193	1.43064	b2+;y3+;y4+;Y0+;Y0+;Y1+;Y1+;Y2+;Y3+;Y4+;	y3+;Y0+;Y1+;	No
MS2.9595.9595.3.1.dta	3357.33	769.388	3	YFTPJK	-	2587.94	7-5-0-0-3	5,	7	0.30881	3	0.09346	0.34624	4.13193	1.43064	b2+;y3+;y4+;Y0+;Y0+;Y1+;Y1+;Y2+;Y3+;Y4+;	y3+;Y0+;Y1+;	No
MS2.22629.22629.3.0.dta	4472.88	2339.08	3	GLTFQQJASSMCVPDQDTAIR	12,Carbamidomethyl[C];	2133.77	6-5-0-0-1	7,	0	0	12	0.35213	0.31319	4.543	1.42282	b8+;y1+;y2+;y3+;y4+;y5+;y6+;y7+;y8+;y9+;y10+;y12+;	y1+;y4+;y6+;y8+;	No
MS2.19451.19451.3.0.dta	4309.79	2355.07	3	GLTFQQJASSMCVPDQDTAIR	11,Oxidation[M];12,Carbamidomethyl[C];	1954.7	4-5-1-0-0	7,	0	0	9	0.51816	0.31242	4.55026	1.4216	b3+;b8+;y1+;y3+;y4+;y5+;y6+;y8+;y10+;	y1+;y4+;y6+;y8+;	No
MS2.36936.36936.5.0.dta	5327.32	3413.63	5	SLGNVJFTVSAEALESQELCGTEVPSVPEHGR	20,Carbamidomethyl[C];	1913.68	5-4-1-0-0	6,	0	0	7	0.47345	0.27274	5.17648	1.41185	y2+;y3+;y5+;y8+;y9+;y10+;y12+;	y2+;y3+;y5+;y8+;y9+;	Yes	3	1	1
MS2.36936.36936.5.1.dta	5328.32	3413.63	5	SLGNVJFTVSAEALESQELCGTEVPSVPEHGR	20,Carbamidomethyl[C];	1914.7	5-4-0-0-2	6,	0	0	7	0.47345	0.27274	5.17648	1.41185	y2+;y3+;y5+;y8+;y9+;y10+;y12+;	y2+;y3+;y5+;y8+;y9+;	No
MS2.26551.26551.4.0.dta	4023.71	1744.89	4	YFTPJKTEDTIFLR	-	2278.81	6-5-1-0-0	5,	7	0.17873	8	0.12271	0.27106	5.20034	1.40963	b2+;b3+;y1+;y3+;y5+;y7+;y8+;y11+;Y0+;Y1+;Y0++;Y0++;Y1++;Y1++;Y3++;	y5+;y8+;Y1+;Y0++;Y1++;	Yes	1	1	1
MS2.26551.26551.4.3.dta	4024.71	1744.89	4	YFTPJKTEDTIFLR	-	2279.83	6-5-0-0-2	5,	7	0.17873	8	0.12271	0.27106	5.20034	1.40963	b2+;b3+;y1+;y3+;y5+;y7+;y8+;y11+;Y0+;Y1+;Y0++;Y0++;Y1++;Y1++;Y3++;	y5+;y8+;Y1+;Y0++;Y1++;	No
MS2.18877.18877.4.2.dta	4455.85	2339.08	4	GLTFQQJASSMCVPDQDTAIR	12,Carbamidomethyl[C];	2116.76	5-5-1-0-0	7,	0	0	7	0.46261	0.31002	4.543	1.40844	b8+;y1+;y3+;y4+;y5+;y6+;y8+;	y4+;y5+;y6+;y8+;	No
MS2.18877.18877.4.1.dta	4456.85	2339.08	4	GLTFQQJASSMCVPDQDTAIR	12,Carbamidomethyl[C];	2117.78	5-5-0-0-2	7,	0	0	7	0.46261	0.31002	4.543	1.40844	b8+;y1+;y3+;y4+;y5+;y6+;y8+;	y4+;y5+;y6+;y8+;	No
MS2.29051.29051.4.1.dta	4359	2695.39	4	MVSHHJLTTGATLINEQWLLTTAK	1,Oxidation[M];	1663.61	4-5-0-0-0	6,	0	0	11	0.34583	0.24145	5.80803	1.40238	y1+;y2+;y3+;y4+;y5+;y6+;y7+;y8+;y9+;y10+;y11+;	y3+;y4+;y5+;y6+;y7+;y10+;	No
MS2.31123.31123.4.3.dta	4382.96	1795.01	4	VVLHPJYSQVDIGLIK	-	2587.94	7-5-0-0-3	6,	10	0.13188	11	0.16273	0.30694	4.55026	1.39666	b3+;b4+;b11+;y1+;y2+;y3+;y4+;y5+;y6+;y9+;y12+;Y0+;Y1+;Y0++;Y1++;Y1++;Y2++;Y2++;Y3++;Y4++;Y5++;	b4+;y5+;Y1+;Y1++;	No
MS2.31123.31123.4.1.dta	4381.96	1795.01	4	VVLHPJYSQVDIGLIK	-	2586.92	7-5-1-0-1	6,	10	0.13188	11	0.16273	0.30694	4.55026	1.39666	b3+;b4+;b11+;y1+;y2+;y3+;y4+;y5+;y6+;y9+;y12+;Y0+;Y1+;Y0++;Y1++;Y1++;Y2++;Y2++;Y3++;Y4++;Y5++;	b4+;y5+;Y1+;Y1++;	Yes	1	1	1
MS2.32157.32157.4.1.dta	4593.11	2679.39	4	MVSHHJLTTGATLINEQWLLTTAK	-	1913.68	5-4-1-0-0	6,	5	0.02992	24	0.23222	0.3619	3.85904	1.39658	b4+;b5+;b6+;b7+;b8+;b11+;b12+;b14+;y1+;y2+;y3+;y4+;y5+;y7+;y9+;y10+;y11+;y12+;y13+;y14+;y15+;y16+;y17+;y18+;Y0++;Y0++;Y1++;Y1++;Y2++;	y3+;y4+;y5+;	Yes	1	1	1
MS2.7306.7306.2.1.dta	2999.19	1189.51	2	EEQYJSTYR	-	1809.67	4-5-0-0-1	5,	6	0.30337	2	0.04366	0.22978	6.07744	1.39648	y1+;y4+;Y0+;Y0+;Y1+;Y1+;Y2+;Y3+;	y1+;y4+;Y0+;Y1+;Y2+;Y3+;	Yes	3	1	1
MS2.8499.8499.4.0.dta	3676.55	1122.63	4	LAGKPTHVJVS	-	2553.91	5-5-2-0-1	9,	6	0.29733	4	0.07821	0.29352	4.74648	1.39317	b7+;b8+;b10+;y7+;Y0+;Y0+;Y1+;Y1+;Y2+;Y3+;	b8+;Y0+;Y0+;Y1+;	Yes	3	1	1
MS2.8499.8499.4.3.dta	3677.55	1122.63	4	LAGKPTHVJVS	-	2554.93	5-5-1-0-3	9,	6	0.29733	4	0.07821	0.29352	4.74648	1.39317	b7+;b8+;b10+;y7+;Y0+;Y0+;Y1+;Y1+;Y2+;Y3+;	b8+;Y0+;Y0+;Y1+;	No
MS2.25878.25878.3.1.dta	3467.48	1593.83	3	SIJTTNVMGTSLTVR	-	1873.67	6-3-0-0-2	3,	4	0.13436	10	0.1964	0.29826	4.66539	1.39151	y1+;y3+;y5+;y7+;y8+;y9+;y10+;y11+;y12+;y13+;Y0+;Y0+;Y1+;Y1+;	y7+;y8+;Y0+;Y1+;	Yes	1	1	1
MS2.3770.3770.3.0.dta	3675.38	796.347	3	NEEYJK	-	2879.04	7-5-1-0-3	5,	6	0.30418	4	0.09765	0.33663	4.13193	1.39095	b2+;b3+;y2+;y3+;Y0+;Y0+;Y1+;Y1+;Y4+;Y4+;	b3+;Y0+;Y1+;	Yes	1	1	1
MS2.38692.38692.4.1.dta	4630.08	3413.63	4	SLGNVJFTVSAEALESQELCGTEVPSVPEHGR	20,Carbamidomethyl[C];	1216.42	5-2-0-0-0	6,	0	0	6	0.47795	0.26743	5.17648	1.38436	b2+;y2+;y3+;y5+;y8+;y9+;	b2+;y3+;y5+;y8+;y9+;	No
MS2.35794.35794.5.0.dta	5286.3	3413.63	5	SLGNVJFTVSAEALESQELCGTEVPSVPEHGR	20,Carbamidomethyl[C];	1872.65	6-3-1-0-0	6,	0	0	9	0.50367	0.30425	4.53585	1.38001	b2+;y1+;y2+;y3+;y5+;y8+;y9+;y12+;y13+;	y3+;y5+;y8+;y9+;	No
MS2.35794.35794.5.1.dta	5287.3	3413.63	5	SLGNVJFTVSAEALESQELCGTEVPSVPEHGR	20,Carbamidomethyl[C];	1873.67	6-3-0-0-2	6,	0	0	9	0.50367	0.30425	4.53585	1.38001	b2+;y1+;y2+;y3+;y5+;y8+;y9+;y12+;y13+;	y3+;y5+;y8+;y9+;	No
MS2.33082.33082.4.2.dta	4758.16	3541.72	4	SLGNVJFTVSAEALESQELCGTEVPSVPEHGRK	20,Carbamidomethyl[C];	1216.42	5-2-0-0-0	6,	0	0	12	0.44638	0.30194	4.543	1.37171	b2+;b3+;b4+;b5+;b7+;y3+;y4+;y6+;y9+;y10+;y11+;y13+;	y4+;y6+;y9+;y13+;	No
MS2.32648.32648.4.1.dta	4827.04	1891.96	4	FYFTPJKTEDTIFLR	-	2935.04	7-6-2-0-0	6,	8	0.1535	9	0.15737	0.30012	4.56511	1.3701	b2+;b3+;y1+;y3+;y5+;y6+;y7+;y8+;y11+;Y0+;Y0++;Y0++;Y1++;Y1++;Y2++;Y3++;Y4++;	b2+;y5+;Y0++;Y1++;	Yes	1	1	1
MS2.32648.32648.4.3.dta	4829.04	1891.96	4	FYFTPJKTEDTIFLR	-	2937.08	7-6-0-0-4	6,	8	0.1535	9	0.15737	0.30012	4.56511	1.3701	b2+;b3+;y1+;y3+;y5+;y6+;y7+;y8+;y11+;Y0+;Y0++;Y0++;Y1++;Y1++;Y2++;Y3++;Y4++;	b2+;y5+;Y0++;Y1++;	Yes	1	1	1
MS2.4891.4891.3.1.dta	3710.5	1284.62	3	YKJNSDISSTR	-	2425.89	6-5-0-0-3	3,	4	0.12526	7	0.16776	0.2878	4.74648	1.36603	y2+;y4+;y5+;y6+;y7+;y8+;y9+;Y0+;Y0+;Y1+;Y2+;	y4+;y5+;Y0+;Y1+;	No
MS2.4891.4891.3.0.dta	3709.5	1284.62	3	YKJNSDISSTR	-	2424.87	6-5-1-0-1	3,	4	0.12526	7	0.16776	0.2878	4.74648	1.36603	y2+;y4+;y5+;y6+;y7+;y8+;y9+;Y0+;Y0+;Y1+;Y2+;	y4+;y5+;Y0+;Y1+;	Yes	1	1	1
MS2.2870.2870.3.0.dta	2418.94	796.347	3	NEEYJK	-	1622.58	5-4-0-0-0	5,	2	0.37482	2	0.12963	0.28019	4.87333	1.36546	b2+;b3+;Y0+;Y1+;	b2+;b3+;Y0+;Y1+;	Yes	3	1	1
MS2.14457.14457.3.1.dta	3530.51	958.557	3	TPLTAJITK	-	2571.95	6-5-0-0-4	6,	4	0.29968	4	0.09243	0.2847	4.79306	1.36457	b3+;b4+;b6+;b7+;Y0+;Y0+;Y1+;Y2+;	b7+;Y0+;Y0+;Y1+;	No
MS2.8314.8314.3.1.dta	3104.21	1189.51	3	EEQYJSTYR	-	1914.7	5-4-0-0-2	5,	7	0.32804	6	0.03502	0.28457	4.79306	1.36398	b3+;b6+;y1+;y2+;y3+;y4+;Y0+;Y0+;Y1+;Y1+;Y2+;Y3+;Y4+;	Y0+;Y1+;Y1+;Y4+;	No
MS2.8314.8314.3.0.dta	3103.2	1189.51	3	EEQYJSTYR	-	1913.68	5-4-1-0-0	5,	7	0.32804	6	0.03502	0.28457	4.79306	1.36398	b3+;b6+;y1+;y2+;y3+;y4+;Y0+;Y0+;Y1+;Y1+;Y2+;Y3+;Y4+;	Y0+;Y1+;Y1+;Y4+;	Yes	1	1	1
MS2.36489.36489.5.1.dta	5328.33	3413.63	5	SLGNVJFTVSAEALESQELCGTEVPSVPEHGR	20,Carbamidomethyl[C];	1914.7	5-4-0-0-2	6,	0	0	11	0.45006	0.30032	4.53585	1.36221	b2+;b4+;y2+;y3+;y5+;y7+;y8+;y9+;y12+;y13+;y14+;	y3+;y5+;y8+;y9+;	Yes	2	1	1
MS2.36489.36489.5.0.dta	5327.3	3413.63	5	SLGNVJFTVSAEALESQELCGTEVPSVPEHGR	20,Carbamidomethyl[C];	1913.68	5-4-1-0-0	6,	0	0	11	0.45006	0.30032	4.53585	1.36221	b2+;b4+;y2+;y3+;y5+;y7+;y8+;y9+;y12+;y13+;y14+;	y3+;y5+;y8+;y9+;	No
MS2.14276.14276.3.0.dta	2967.2	1157.52	3	EEQFJSTFR	-	1809.67	4-5-0-0-1	5,	6	0.2896	6	0.06489	0.28412	4.79306	1.36182	b3+;b5+;y1+;y2+;y3+;y4+;Y0+;Y1+;Y1+;Y2+;Y3+;Y4+;	y1+;Y0+;Y1+;Y2+;	Yes	1	1	1
MS2.33616.33616.3.2.dta	4755	1891.96	3	FYFTPJKTEDTIFLR	-	2863.04	6-5-1-0-4	6,	4	0.07924	10	0.2481	0.29771	4.56511	1.3591	b2+;b3+;y1+;y3+;y4+;y5+;y7+;y8+;y9+;y11+;Y0+;Y0++;Y0++;Y1++;	b2+;y5+;Y0++;Y1++;	Yes	1	1	1
MS2.33616.33616.3.1.dta	4753	1891.96	3	FYFTPJKTEDTIFLR	-	2861	6-5-3-0-0	6,	4	0.07924	10	0.2481	0.29771	4.56511	1.3591	b2+;b3+;y1+;y3+;y4+;y5+;y7+;y8+;y9+;y11+;Y0+;Y0++;Y0++;Y1++;	b2+;y5+;Y0++;Y1++;	Yes	1	1	1
MS2.32960.32960.5.0.dta	5090.31	3541.72	5	SLGNVJFTVSAEALESQELCGTEVPSVPEHGRK	20,Carbamidomethyl[C];	1548.54	4-3-1-0-0	6,	0	0	14	0.38969	0.29818	4.543	1.35464	b2+;b3+;b4+;b5+;b6+;b7+;y3+;y4+;y6+;y7+;y9+;y10+;y13+;y14+;	b2+;y4+;y6+;y9+;	No
MS2.32960.32960.5.1.dta	5091.32	3541.72	5	SLGNVJFTVSAEALESQELCGTEVPSVPEHGRK	20,Carbamidomethyl[C];	1549.57	4-3-0-0-2	6,	0	0	14	0.38969	0.29818	4.543	1.35464	b2+;b3+;b4+;b5+;b6+;b7+;y3+;y4+;y6+;y7+;y9+;y10+;y13+;y14+;	b2+;y4+;y6+;y9+;	No
MS2.4027.4027.3.1.dta	3347.31	776.39	3	EJGTISR	-	2570.93	6-5-1-0-2	2,	8	0.33016	2	0.01589	0.27946	4.84496	1.35399	y1+;y5+;Y0+;Y0+;Y1+;Y1+;Y2+;Y3+;Y4+;Y5+;	Y1+;Y2+;Y3+;Y4+;	No
MS2.4027.4027.3.0.dta	3346.31	776.39	3	EJGTISR	-	2569.9	6-5-2-0-0	2,	8	0.33016	2	0.01589	0.27946	4.84496	1.35399	y1+;y5+;Y0+;Y0+;Y1+;Y1+;Y2+;Y3+;Y4+;Y5+;	Y1+;Y2+;Y3+;Y4+;	Yes	3	1	1
MS2.9974.9974.3.0.dta	4240.7	1920.85	3	QQJASSMCVPDQDTAIR	8,Carbamidomethyl[C];	2319.84	5-6-1-0-0	3,	0	0	4	0.57149	0.29837	4.53585	1.35337	y1+;y4+;y6+;y8+;	y1+;y4+;y6+;y8+;	No
MS2.25309.25309.3.1.dta	3669.52	1593.83	3	SIJTTNVMGTSLTVR	-	2075.73	6-4-1-0-0	3,	4	0.12321	11	0.18821	0.28967	4.66539	1.35144	b2+;b3+;y1+;y3+;y5+;y6+;y7+;y8+;y9+;y10+;y13+;Y0+;Y0+;Y1+;Y1+;	y1+;y7+;y8+;Y1+;	Yes	1	1	1
MS2.25309.25309.3.2.dta	3670.59	1593.83	3	SIJTTNVMGTSLTVR	-	2076.75	6-4-0-0-2	3,	4	0.12321	11	0.18821	0.28967	4.66539	1.35144	b2+;b3+;y1+;y3+;y5+;y6+;y7+;y8+;y9+;y10+;y13+;Y0+;Y0+;Y1+;Y1+;	y1+;y7+;y8+;Y1+;	Yes	1	1	1
MS2.9694.9694.3.0.dta	3339.3	769.388	3	YFTPJK	-	2569.9	6-5-2-0-0	5,	5	0.27741	4	0.09701	0.32549	4.13193	1.34492	b2+;y2+;y3+;y4+;Y0+;Y0+;Y1+;Y1+;Y3+;	y3+;Y0+;Y1+;	Yes	1	1	1
MS2.9694.9694.3.1.dta	3340.31	769.388	3	YFTPJK	-	2570.93	6-5-1-0-2	5,	5	0.27741	4	0.09701	0.32549	4.13193	1.34492	b2+;y2+;y3+;y4+;Y0+;Y0+;Y1+;Y1+;Y3+;	y3+;Y0+;Y1+;	No
MS2.28062.28062.4.0.dta	4727.86	1920.85	4	QQJASSMCVPDQDTAIR	8,Carbamidomethyl[C];	2807.01	8-6-0-0-2	3,	0	0	14	0.30171	0.29633	4.53585	1.34413	y1+;y2+;y3+;y4+;y5+;y6+;y7+;y8+;y9+;y10+;y11+;y12+;y13+;y14+;	y1+;y4+;y6+;y8+;	No
MS2.19401.19401.3.1.dta	4512.88	2355.07	3	GLTFQQJASSMCVPDQDTAIR	11,Oxidation[M];12,Carbamidomethyl[C];	2157.78	4-6-1-0-0	7,	0	0	7	0.50987	0.29451	4.55026	1.34011	b3+;y1+;y4+;y5+;y6+;y8+;y10+;	y1+;y4+;y6+;y8+;	No
MS2.13041.13041.3.1.dta	2873.24	958.557	3	TPLTAJITK	-	1914.7	5-4-0-0-2	6,	5	0.30455	6	0.09612	0.32812	4.06094	1.33247	b4+;b5+;b6+;b7+;b8+;y4+;Y0+;Y0+;Y1+;Y1+;Y4+;	b7+;Y0+;Y1+;	No
MS2.13041.13041.3.0.dta	2872.24	958.557	3	TPLTAJITK	-	1913.68	5-4-1-0-0	6,	5	0.30455	6	0.09612	0.32812	4.06094	1.33247	b4+;b5+;b6+;b7+;b8+;y4+;Y0+;Y0+;Y1+;Y1+;Y4+;	b7+;Y0+;Y1+;	Yes	1	1	1
MS2.36910.36910.5.1.dta	5166.28	3413.63	5	SLGNVJFTVSAEALESQELCGTEVPSVPEHGR	20,Carbamidomethyl[C];	1752.64	4-4-0-0-2	6,	0	0	5	0.50573	0.25682	5.17648	1.32943	b5+;y2+;y3+;y5+;y8+;	b5+;y2+;y3+;y5+;y8+;	No
MS2.36910.36910.5.0.dta	5165.26	3413.63	5	SLGNVJFTVSAEALESQELCGTEVPSVPEHGR	20,Carbamidomethyl[C];	1751.62	4-4-1-0-0	6,	0	0	5	0.50573	0.25682	5.17648	1.32943	b5+;y2+;y3+;y5+;y8+;	b5+;y2+;y3+;y5+;y8+;	No
MS2.9619.9619.3.0.dta	3721.47	769.388	3	YFTPJK	-	2952.05	8-6-1-0-1	5,	5	0.30412	3	0.09512	0.32158	4.13193	1.32876	b2+;y3+;y4+;Y0+;Y1+;Y1+;Y2+;Y4+;	y3+;Y0+;Y1+;	No
MS2.36708.36708.5.0.dta	5328.32	3413.63	5	SLGNVJFTVSAEALESQELCGTEVPSVPEHGR	20,Carbamidomethyl[C];	1914.7	5-4-0-0-2	6,	0	0	9	0.46527	0.29201	4.53585	1.3245	b2+;y1+;y3+;y5+;y6+;y8+;y9+;y13+;y14+;	y3+;y5+;y8+;y9+;	No
MS2.19322.19322.4.0.dta	4732.94	2339.08	4	GLTFQQJASSMCVPDQDTAIR	12,Carbamidomethyl[C];	2393.87	6-7-0-0-0	7,	0	0	9	0.38282	0.29077	4.543	1.32098	b3+;y1+;y3+;y4+;y5+;y6+;y7+;y8+;y9+;	y1+;y4+;y6+;y8+;	No
MS2.32336.32336.5.0.dta	4920.22	3541.72	5	SLGNVJFTVSAEALESQELCGTEVPSVPEHGRK	20,Carbamidomethyl[C];	1378.48	6-2-0-0-0	6,	0	0	12	0.3334	0.25453	5.18431	1.31958	b2+;b4+;b5+;b7+;b8+;y1+;y3+;y4+;y6+;y10+;y13+;y14+;	b2+;b5+;y4+;y6+;y10+;	No
MS2.8425.8425.4.1.dta	3473.47	1122.63	4	LAGKPTHVJVS	-	2350.83	5-4-2-0-1	9,	6	0.29908	4	0.05634	0.2772	4.74648	1.31574	b7+;b8+;b10+;y7+;Y0+;Y0+;Y1+;Y2+;Y3+;Y4+;	b8+;Y0+;Y0+;Y1+;	Yes	1	1	1
MS2.8425.8425.4.3.dta	3474.47	1122.63	4	LAGKPTHVJVS	-	2351.85	5-4-1-0-3	9,	6	0.29908	4	0.05634	0.2772	4.74648	1.31574	b7+;b8+;b10+;y7+;Y0+;Y0+;Y1+;Y2+;Y3+;Y4+;	b8+;Y0+;Y0+;Y1+;	No
MS2.3658.3658.3.1.dta	2857.09	796.347	3	NEEYJK	-	2060.76	5-4-0-0-3	5,	4	0.18158	5	0.15429	0.31815	4.13193	1.31457	b2+;b3+;y2+;y3+;y4+;Y0+;Y0+;Y1+;Y4+;	b2+;b3+;Y0+;	No
MS2.3658.3658.3.0.dta	2856.09	796.347	3	NEEYJK	-	2059.73	5-4-1-0-1	5,	4	0.18158	5	0.15429	0.31815	4.13193	1.31457	b2+;b3+;y2+;y3+;y4+;Y0+;Y0+;Y1+;Y4+;	b2+;b3+;Y0+;	Yes	1	1	1
MS2.7135.7135.2.0.dta	2958.16	1189.51	2	EEQYJSTYR	-	1768.64	5-4-0-0-1	5,	6	0.30643	4	0.07298	0.27417	4.79306	1.31411	b3+;y1+;y3+;y4+;Y0+;Y0+;Y1+;Y1+;Y2+;Y3+;	y1+;Y0+;Y0+;Y1+;	Yes	3	1	1
MS2.5122.5122.3.1.dta	3345.36	1284.62	3	YKJNSDISSTR	-	2060.76	5-4-0-0-3	3,	6	0.16408	7	0.10158	0.27569	4.74648	1.30855	y1+;y3+;y4+;y6+;y7+;y8+;y9+;Y0+;Y0+;Y1+;Y1+;Y2+;Y3+;	y4+;y7+;Y0+;Y1+;	No
MS2.5122.5122.3.0.dta	3344.36	1284.62	3	YKJNSDISSTR	-	2059.73	5-4-1-0-1	3,	6	0.16408	7	0.10158	0.27569	4.74648	1.30855	y1+;y3+;y4+;y6+;y7+;y8+;y9+;Y0+;Y0+;Y1+;Y1+;Y2+;Y3+;	y4+;y7+;Y0+;Y1+;	Yes	1	1	1
MS2.34143.34143.5.0.dta	5327.31	3413.63	5	SLGNVJFTVSAEALESQELCGTEVPSVPEHGR	20,Carbamidomethyl[C];	1913.68	5-4-1-0-0	6,	0	0	9	0.45902	0.28795	4.53585	1.30608	b2+;b4+;y2+;y3+;y5+;y8+;y9+;y13+;y14+;	y3+;y5+;y8+;y9+;	Yes	2	1	1
MS2.5306.5306.4.1.dta	3838.54	1284.62	4	YKJNSDISSTR	-	2553.91	5-5-2-0-1	3,	9	0.21275	7	0.08694	0.28508	4.58043	1.30578	y3+;y4+;y5+;y6+;y7+;y8+;y9+;Y0+;Y0+;Y1+;Y1+;Y2+;Y0++;Y0++;Y1++;Y2++;	y5+;Y0+;Y1+;Y1++;	Yes	1	1	1
MS2.20721.20721.4.0.dta	4950.02	2339.08	4	GLTFQQJASSMCVPDQDTAIR	12,Carbamidomethyl[C];	2610.93	5-6-2-0-0	7,	0	0	17	0.35793	0.33978	3.83944	1.30457	b3+;b5+;b6+;b7+;b8+;b9+;y1+;y2+;y3+;y4+;y5+;y6+;y7+;y8+;y9+;y10+;y12+;	y4+;y6+;y8+;	No
MS2.30217.30217.4.2.dta	4651.11	2679.39	4	MVSHHJLTTGATLINEQWLLTTAK	-	1971.72	5-5-0-0-1	6,	0	0	18	0.2495	0.2856	4.56511	1.30379	b8+;b12+;y1+;y2+;y3+;y4+;y5+;y6+;y7+;y8+;y9+;y10+;y11+;y12+;y13+;y15+;y16+;y17+;	y3+;y4+;y5+;y6+;	No
MS2.30439.30439.3.0.dta	4340.89	1753.93	3	CANLVPVPITJATLDR	1,Carbamidomethyl[C];	2586.92	7-5-1-0-1	11,	4	0.04214	11	0.29116	0.27882	4.67479	1.30342	b2+;b3+;b4+;b5+;b6+;b11+;y1+;y3+;y4+;y5+;y11+;Y0+;Y0+;Y1+;Y1+;	b2+;b3+;b4+;Y1+;	Yes	1	1	1
MS2.30439.30439.3.1.dta	4341.88	1753.93	3	CANLVPVPITJATLDR	1,Carbamidomethyl[C];	2587.94	7-5-0-0-3	11,	4	0.04214	11	0.29116	0.27882	4.67479	1.30342	b2+;b3+;b4+;b5+;b6+;b11+;y1+;y3+;y4+;y5+;y11+;Y0+;Y0+;Y1+;Y1+;	b2+;b3+;b4+;Y1+;	No
MS2.23849.23849.4.1.dta	4705.92	2355.07	4	GLTFQQJASSMCVPDQDTAIR	11,Oxidation[M];12,Carbamidomethyl[C];	2350.83	5-4-2-0-1	7,	0	0	10	0.38162	0.28511	4.55026	1.29732	b8+;y1+;y3+;y4+;y5+;y6+;y8+;y9+;y12+;y13+;	y1+;y4+;y6+;y8+;	No
MS2.4090.4090.3.2.dta	3054.21	993.46	3	JNSDISSTR	-	2060.76	5-4-0-0-3	1,	8	0.21391	6	0.09907	0.31923	4.06094	1.29636	b4+;y1+;y2+;y4+;y5+;y8+;Y0+;Y0+;Y1+;Y1+;Y2+;Y3+;Y4+;Y5+;	y5+;Y0+;Y1+;	No
MS2.4090.4090.3.1.dta	3053.21	993.46	3	JNSDISSTR	-	2059.73	5-4-1-0-1	1,	8	0.21391	6	0.09907	0.31923	4.06094	1.29636	b4+;y1+;y2+;y4+;y5+;y8+;Y0+;Y0+;Y1+;Y1+;Y2+;Y3+;Y4+;Y5+;	y5+;Y0+;Y1+;	Yes	1	1	1
MS2.19390.19390.5.2.dta	4659.93	2339.08	5	GLTFQQJASSMCVPDQDTAIR	12,Carbamidomethyl[C];	2320.86	5-6-0-0-2	7,	0	0	10	0.33623	0.28505	4.543	1.29497	b3+;y1+;y2+;y3+;y4+;y5+;y6+;y8+;y10+;y12+;	y4+;y6+;y8+;y12+;	No
MS2.19390.19390.5.0.dta	4658.91	2339.08	5	GLTFQQJASSMCVPDQDTAIR	12,Carbamidomethyl[C];	2319.84	5-6-1-0-0	7,	0	0	10	0.33623	0.28505	4.543	1.29497	b3+;y1+;y2+;y3+;y4+;y5+;y6+;y8+;y10+;y12+;	y4+;y6+;y8+;y12+;	No
MS2.36834.36834.4.2.dta	5303.34	3413.63	4	SLGNVJFTVSAEALESQELCGTEVPSVPEHGR	20,Carbamidomethyl[C];	1889.67	7-3-0-0-1	6,	0	0	7	0.51001	0.28449	4.53585	1.29039	b2+;y1+;y3+;y5+;y8+;y9+;y12+;	y3+;y5+;y8+;y9+;	No
MS2.35616.35616.4.1.dta	5141.2	3413.63	4	SLGNVJFTVSAEALESQELCGTEVPSVPEHGR	20,Carbamidomethyl[C];	1727.61	6-3-0-0-1	6,	0	0	9	0.45468	0.28417	4.53585	1.28895	b2+;b7+;y3+;y5+;y8+;y9+;y12+;y13+;y14+;	y3+;y5+;y8+;y9+;	No
MS2.2720.2720.3.0.dta	2710.04	796.347	3	NEEYJK	-	1913.68	5-4-1-0-0	5,	3	0.25377	3	0.11026	0.26385	4.87333	1.28582	b2+;b3+;y3+;Y0+;Y0+;Y1+;	b2+;b3+;Y0+;Y0+;	Yes	1	1	1
MS2.2720.2720.3.1.dta	2711.04	796.347	3	NEEYJK	-	1914.7	5-4-0-0-2	5,	3	0.25377	3	0.11026	0.26385	4.87333	1.28582	b2+;b3+;y3+;Y0+;Y0+;Y1+;	b2+;b3+;Y0+;Y0+;	No
MS2.3684.3684.3.1.dta	3367.27	796.347	3	NEEYJK	-	2570.93	6-5-1-0-2	5,	5	0.21377	5	0.09748	0.31043	4.13193	1.28266	b2+;b3+;b4+;y2+;y3+;Y0+;Y0+;Y1+;Y2+;Y3+;	b3+;Y0+;Y1+;	No
MS2.3684.3684.3.0.dta	3366.26	796.347	3	NEEYJK	-	2569.9	6-5-2-0-0	5,	5	0.21377	5	0.09748	0.31043	4.13193	1.28266	b2+;b3+;b4+;y2+;y3+;Y0+;Y0+;Y1+;Y2+;Y3+;	b3+;Y0+;Y1+;	Yes	1	1	1
MS2.37261.37261.4.0.dta	4758.16	3541.72	4	SLGNVJFTVSAEALESQELCGTEVPSVPEHGRK	20,Carbamidomethyl[C];	1216.42	5-2-0-0-0	6,	0	0	11	0.34828	0.24705	5.18431	1.28081	b2+;b3+;b4+;b5+;y3+;y4+;y6+;y8+;y10+;y11+;y13+;	b4+;y4+;y6+;y10+;y13+;	No
MS2.26216.26216.3.1.dta	4634.91	2339.08	3	GLTFQQJASSMCVPDQDTAIR	12,Carbamidomethyl[C];	2295.82	7-5-0-0-1	7,	0	0	6	0.40409	0.28107	4.543	1.27689	y1+;y3+;y4+;y5+;y6+;y8+;	y1+;y4+;y6+;y8+;	No
MS2.13621.13621.3.1.dta	3060.33	958.557	3	TPLTAJITK	-	2101.78	4-5-0-0-3	6,	3	0.30802	2	0.069	0.2334	5.45862	1.27407	b6+;b7+;Y0+;Y0+;Y1+;	b6+;b7+;Y0+;Y0+;Y1+;	No
MS2.13621.13621.3.0.dta	3059.33	958.557	3	TPLTAJITK	-	2100.76	4-5-1-0-1	6,	3	0.30802	2	0.069	0.2334	5.45862	1.27407	b6+;b7+;Y0+;Y0+;Y1+;	b6+;b7+;Y0+;Y0+;Y1+;	No
MS2.34614.34614.4.1.dta	4979.21	3413.63	4	SLGNVJFTVSAEALESQELCGTEVPSVPEHGR	20,Carbamidomethyl[C];	1565.56	5-3-0-0-1	6,	0	0	8	0.46649	0.28049	4.53585	1.27224	b4+;y3+;y5+;y7+;y8+;y9+;y12+;y13+;	y3+;y5+;y8+;y12+;	Yes	2	1	1
MS2.3425.3425.2.0.dta	2784.07	796.347	2	NEEYJK	-	1987.71	6-5-0-0-0	5,	3	0.27679	2	0.12928	0.26079	4.87333	1.27094	b2+;b3+;Y0+;Y0+;Y1+;	b2+;b3+;Y0+;Y1+;	No
MS2.32683.32683.3.0.dta	4827.04	1891.96	3	FYFTPJKTEDTIFLR	-	2935.04	7-6-2-0-0	6,	3	0.06394	9	0.26432	0.27789	4.56511	1.26859	b2+;b3+;y1+;y2+;y3+;y5+;y6+;y7+;y8+;Y0++;Y0++;Y1++;	b2+;y5+;y8+;Y1++;	Yes	1	1	1
MS2.36455.36455.4.1.dta	4792.08	3413.63	4	SLGNVJFTVSAEALESQELCGTEVPSVPEHGR	20,Carbamidomethyl[C];	1378.48	6-2-0-0-0	6,	0	0	7	0.42443	0.24453	5.17648	1.26583	b2+;y1+;y3+;y5+;y6+;y8+;y12+;	y1+;y3+;y5+;y8+;y12+;	Yes	2	1	1
MS2.4202.4202.3.0.dta	3820.44	796.347	3	NEEYJK	-	3024.07	7-5-2-0-2	5,	6	0.21739	5	0.07156	0.30537	4.13193	1.26176	b2+;b3+;b4+;y2+;y3+;Y0+;Y0+;Y1+;Y1+;Y2+;Y3+;	b3+;Y0+;Y1+;	Yes	1	1	1
MS2.8460.8460.3.0.dta	3473.47	1122.63	3	LAGKPTHVJVS	-	2350.83	5-4-2-0-1	9,	6	0.16451	7	0.13368	0.31381	4.01971	1.26144	b7+;b8+;b9+;b10+;y5+;y7+;y9+;Y0+;Y1+;Y1+;Y2+;Y3+;Y4+;	b8+;Y0+;Y1+;	Yes	1	1	1
MS2.20734.20734.3.0.dta	4950.04	2339.08	3	GLTFQQJASSMCVPDQDTAIR	12,Carbamidomethyl[C];	2610.93	5-6-2-0-0	7,	0	0	8	0.48227	0.3284	3.83944	1.26088	b3+;y1+;y3+;y4+;y5+;y6+;y8+;y10+;	y4+;y6+;y8+;	No
MS2.26103.26103.3.0.dta	3524.54	1593.83	3	SIJTTNVMGTSLTVR	-	1930.69	6-4-0-0-1	3,	4	0.15606	13	0.17388	0.31913	3.94791	1.2599	b2+;b3+;b4+;y1+;y3+;y4+;y5+;y7+;y8+;y9+;y10+;y11+;y12+;Y0+;Y0+;Y1+;Y1+;	y7+;y8+;Y1+;	Yes	1	1	1
MS2.13930.13930.2.0.dta	2764.12	1157.52	2	EEQFJSTFR	-	1606.59	4-4-0-0-1	5,	5	0.32211	2	0.04521	0.23078	5.45862	1.25975	y1+;y4+;Y0+;Y0+;Y1+;Y2+;Y3+;	y1+;Y0+;Y0+;Y1+;Y2+;	Yes	3	1	1
MS2.37300.37300.4.0.dta	4962.21	3413.63	4	SLGNVJFTVSAEALESQELCGTEVPSVPEHGR	20,Carbamidomethyl[C];	1548.54	4-3-1-0-0	6,	0	0	7	0.49255	0.27756	4.53585	1.25897	b7+;y3+;y5+;y8+;y9+;y10+;y12+;	y5+;y8+;y10+;y12+;	No
MS2.26028.26028.3.0.dta	3345.46	1593.83	3	SIJTTNVMGTSLTVR	-	1751.62	4-4-1-0-0	3,	5	0.1338	15	0.14558	0.31851	3.94791	1.25745	b2+;b4+;b7+;y1+;y3+;y4+;y5+;y6+;y7+;y8+;y9+;y10+;y11+;y12+;y13+;Y0+;Y0+;Y1+;Y1+;Y2+;	y1+;y8+;Y1+;	Yes	1	1	1
MS2.26028.26028.3.2.dta	3346.46	1593.83	3	SIJTTNVMGTSLTVR	-	1752.64	4-4-0-0-2	3,	5	0.1338	15	0.14558	0.31851	3.94791	1.25745	b2+;b4+;b7+;y1+;y3+;y4+;y5+;y6+;y7+;y8+;y9+;y10+;y11+;y12+;y13+;Y0+;Y0+;Y1+;Y1+;Y2+;	y1+;y8+;Y1+;	No
MS2.5195.5195.3.1.dta	3490.4	1284.62	3	YKJNSDISSTR	-	2205.79	5-4-1-0-2	3,	6	0.2247	6	0.13458	0.31224	4.01971	1.25513	y3+;y4+;y5+;y6+;y7+;y8+;Y0+;Y0+;Y1+;Y1+;Y2+;Y3+;	y5+;Y0+;Y1+;	No
MS2.5195.5195.3.0.dta	3489.4	1284.62	3	YKJNSDISSTR	-	2204.77	5-4-2-0-0	3,	6	0.2247	6	0.13458	0.31224	4.01971	1.25513	y3+;y4+;y5+;y6+;y7+;y8+;Y0+;Y0+;Y1+;Y1+;Y2+;Y3+;	y5+;Y0+;Y1+;	Yes	1	1	1
MS2.14139.14139.2.0.dta	2926.17	1157.52	2	EEQFJSTFR	-	1768.64	5-4-0-0-1	5,	6	0.28184	4	0.06373	0.26157	4.79306	1.25373	b3+;y1+;y3+;y4+;Y0+;Y0+;Y1+;Y1+;Y2+;Y4+;	y1+;Y0+;Y0+;Y1+;	Yes	3	1	1
MS2.18543.18543.3.0.dta	4367.83	2339.08	3	GLTFQQJASSMCVPDQDTAIR	12,Carbamidomethyl[C];	2028.74	5-6-0-0-0	7,	0	0	4	0.55001	0.31583	3.9625	1.25149	y1+;y4+;y6+;y8+;	y4+;y6+;y8+;	No
MS2.35844.35844.4.0.dta	5124.27	3413.63	4	SLGNVJFTVSAEALESQELCGTEVPSVPEHGR	20,Carbamidomethyl[C];	1710.6	5-3-1-0-0	6,	0	0	8	0.44118	0.27584	4.53585	1.25118	b2+;b5+;y2+;y3+;y5+;y8+;y9+;y13+;	y3+;y5+;y8+;y9+;	Yes	3	1	1
MS2.3869.3869.3.2.dta	3149.21	796.347	3	NEEYJK	-	2352.87	5-4-0-0-5	5,	5	0.15559	6	0.08704	0.30093	4.13193	1.24343	b2+;b3+;b4+;y2+;y3+;y4+;Y0+;Y0+;Y1+;Y1+;Y2+;	b3+;Y0+;Y1+;	Yes	1	1	1
MS2.3869.3869.3.0.dta	3147.19	796.347	3	NEEYJK	-	2350.83	5-4-2-0-1	5,	5	0.15559	6	0.08704	0.30093	4.13193	1.24343	b2+;b3+;b4+;y2+;y3+;y4+;Y0+;Y0+;Y1+;Y1+;Y2+;	b3+;Y0+;Y1+;	Yes	1	1	1
MS2.3869.3869.3.1.dta	3148.19	796.347	3	NEEYJK	-	2351.85	5-4-1-0-3	5,	5	0.15559	6	0.08704	0.30093	4.13193	1.24343	b2+;b3+;b4+;y2+;y3+;y4+;Y0+;Y0+;Y1+;Y1+;Y2+;	b3+;Y0+;Y1+;	No
MS2.7726.7726.2.0.dta	2488	1189.51	2	EEQYJSTYR	-	1298.48	3-4-0-0-0	5,	5	0.4016	1	0.02792	0.22762	5.45862	1.24246	y1+;Y0+;Y1+;Y1+;Y2+;Y3+;	y1+;Y0+;Y1+;Y1+;Y2+;	Yes	3	1	1
MS2.19176.19176.4.0.dta	4804.99	2339.08	4	GLTFQQJASSMCVPDQDTAIR	12,Carbamidomethyl[C];	2465.89	5-6-1-0-1	7,	0	0	5	0.40666	0.2734	4.543	1.24204	y1+;y4+;y6+;y8+;y10+;	y1+;y4+;y6+;y8+;	No
MS2.30750.30750.4.0.dta	4145.86	1795.01	4	VVLHPJYSQVDIGLIK	-	2350.83	5-4-2-0-1	6,	5	0.1345	8	0.17902	0.27265	4.55026	1.24064	b4+;b11+;y1+;y2+;y4+;y5+;y6+;y12+;Y1+;Y0++;Y1++;Y2++;Y3++;	b4+;y4+;y5+;Y1++;	Yes	1	1	1
MS2.30750.30750.4.3.dta	4147.86	1795.01	4	VVLHPJYSQVDIGLIK	-	2352.85	7-6-0-0-0	6,	5	0.1345	8	0.17902	0.27265	4.55026	1.24064	b4+;b11+;y1+;y2+;y4+;y5+;y6+;y12+;Y1+;Y0++;Y1++;Y2++;Y3++;	b4+;y4+;y5+;Y1++;	Yes	1	1	0
MS2.37126.37126.5.0.dta	5287.3	3413.63	5	SLGNVJFTVSAEALESQELCGTEVPSVPEHGR	20,Carbamidomethyl[C];	1873.67	6-3-0-0-2	6,	0	0	7	0.46322	0.27053	4.53585	1.22707	b2+;y1+;y3+;y5+;y8+;y9+;y12+;	y3+;y5+;y8+;y9+;	No
MS2.27950.27950.3.0.dta	4678.89	1744.89	3	YFTPJKTEDTIFLR	-	2934.04	5-4-3-0-3	5,	4	0.10685	7	0.2282	0.26884	4.55763	1.22527	b2+;y1+;y3+;y5+;y6+;y7+;y8+;Y0+;Y1+;Y0++;Y1++;	y1+;y5+;y6+;Y1+;	Yes	1	1	1
MS2.27950.27950.3.1.dta	4679.95	1744.89	3	YFTPJKTEDTIFLR	-	2935.04	7-6-2-0-0	5,	4	0.10685	7	0.2282	0.26884	4.55763	1.22527	b2+;y1+;y3+;y5+;y6+;y7+;y8+;Y0+;Y1+;Y0++;Y1++;	y1+;y5+;y6+;Y1+;	Yes	1	1	1
MS2.27950.27950.3.2.dta	4681.95	1744.89	3	YFTPJKTEDTIFLR	-	2937.08	7-6-0-0-4	5,	4	0.10685	7	0.2282	0.26884	4.55763	1.22527	b2+;y1+;y3+;y5+;y6+;y7+;y8+;Y0+;Y1+;Y0++;Y1++;	y1+;y5+;y6+;Y1+;	No
MS2.37128.37128.4.1.dta	5141.24	3413.63	4	SLGNVJFTVSAEALESQELCGTEVPSVPEHGR	20,Carbamidomethyl[C];	1727.61	6-3-0-0-1	6,	0	0	6	0.48146	0.26993	4.53585	1.22435	b2+;y3+;y5+;y8+;y9+;y13+;	y3+;y5+;y8+;y9+;	Yes	2	1	1
MS2.28712.28712.4.1.dta	4049.77	1753.93	4	CANLVPVPITJATLDR	1,Carbamidomethyl[C];	2295.82	7-5-0-0-1	11,	2	0.06169	6	0.29859	0.22975	5.32881	1.22428	b2+;b3+;b4+;b5+;y1+;y11+;Y0+;Y1+;	b2+;b3+;b4+;b5+;Y1+;	Yes	1	1	1
MS2.3782.3782.3.0.dta	2866.12	993.46	3	JNSDISSTR	-	1872.65	6-3-1-0-0	1,	5	0.41185	3	0.07197	0.3009	4.06094	1.22194	y1+;y4+;y5+;Y0+;Y0+;Y1+;Y1+;Y2+;	y5+;Y0+;Y1+;	Yes	3	1	1
MS2.3782.3782.3.1.dta	2867.12	993.46	3	JNSDISSTR	-	1873.67	6-3-0-0-2	1,	5	0.41185	3	0.07197	0.3009	4.06094	1.22194	y1+;y4+;y5+;Y0+;Y0+;Y1+;Y1+;Y2+;	y5+;Y0+;Y1+;	No
MS2.30181.30181.4.0.dta	4243.83	2184.08	4	LAGKPTHVJVSVVMAEVDGTC	21,Carbamidomethyl[C];	2059.73	5-4-1-0-1	9,	0	0	13	0.25535	0.23615	5.16114	1.2188	b4+;b7+;b8+;b10+;b12+;b13+;y1+;y2+;y3+;y4+;y5+;y6+;y9+;	b8+;y1+;y2+;y4+;y5+;	Yes	2	1	1
MS2.30181.30181.4.3.dta	4244.83	2184.08	4	LAGKPTHVJVSVVMAEVDGTC	21,Carbamidomethyl[C];	2060.76	5-4-0-0-3	9,	0	0	13	0.25535	0.23615	5.16114	1.2188	b4+;b7+;b8+;b10+;b12+;b13+;y1+;y2+;y3+;y4+;y5+;y6+;y9+;	b8+;y1+;y2+;y4+;y5+;	No
MS2.31386.31386.4.0.dta	3999.8	1795.01	4	VVLHPJYSQVDIGLIK	-	2204.77	5-4-2-0-0	6,	11	0.11815	12	0.15822	0.3162	3.84588	1.21607	b4+;b11+;y1+;y2+;y3+;y4+;y5+;y6+;y7+;y9+;y10+;y12+;Y0+;Y0+;Y1+;Y0++;Y0++;Y1++;Y1++;Y2++;Y2++;Y3++;Y4++;	b4+;y5+;Y1++;	Yes	1	1	1
MS2.30936.30936.4.3.dta	4512	1795.01	4	VVLHPJYSQVDIGLIK	-	2716.98	6-5-1-0-3	6,	9	0.1467	7	0.14395	0.26684	4.55026	1.21418	b4+;y1+;y2+;y4+;y5+;y6+;y12+;Y0+;Y0+;Y1+;Y0++;Y1++;Y1++;Y2++;Y3++;Y4++;	b4+;y5+;Y1+;Y1++;	No
MS2.30936.30936.4.0.dta	4510.99	1795.01	4	VVLHPJYSQVDIGLIK	-	2715.96	6-5-2-0-1	6,	9	0.1467	7	0.14395	0.26684	4.55026	1.21418	b4+;y1+;y2+;y4+;y5+;y6+;y12+;Y0+;Y0+;Y1+;Y0++;Y1++;Y1++;Y2++;Y3++;Y4++;	b4+;y5+;Y1+;Y1++;	Yes	1	1	1
MS2.31973.31973.3.0.dta	5038.15	1795.01	3	VVLHPJYSQVDIGLIK	-	3243.15	8-6-2-0-1	6,	4	0.10711	9	0.19619	0.26631	4.55026	1.21178	b2+;b4+;y1+;y2+;y4+;y5+;y6+;y7+;y12+;Y0+;Y1+;Y1++;Y2++;	b4+;y5+;Y1+;Y1++;	Yes	1	1	1
MS2.28643.28643.3.0.dta	4195.84	1753.93	3	CANLVPVPITJATLDR	1,Carbamidomethyl[C];	2441.88	7-5-0-0-2	11,	1	0.04075	6	0.33889	0.22711	5.32881	1.21024	b2+;b3+;b4+;b5+;y1+;y4+;Y1+;	b2+;b3+;b4+;b5+;Y1+;	Yes	1	1	1
MS2.25965.25965.3.0.dta	3362.49	1593.83	3	SIJTTNVMGTSLTVR	-	1768.64	5-4-0-0-1	3,	5	0.12767	14	0.15101	0.30637	3.94791	1.20952	b2+;b4+;b7+;b9+;y1+;y3+;y4+;y5+;y6+;y7+;y8+;y10+;y11+;y12+;Y0+;Y0+;Y1+;Y1+;Y2+;	y7+;y8+;Y1+;	Yes	1	1	1
MS2.37926.37926.4.0.dta	5327.33	3413.63	4	SLGNVJFTVSAEALESQELCGTEVPSVPEHGR	20,Carbamidomethyl[C];	1913.68	5-4-1-0-0	6,	0	0	5	0.41148	0.23361	5.17648	1.20925	y2+;y3+;y5+;y8+;y9+;	y2+;y3+;y5+;y8+;y9+;	No
MS2.35434.35434.4.0.dta	4758.18	3541.72	4	SLGNVJFTVSAEALESQELCGTEVPSVPEHGRK	20,Carbamidomethyl[C];	1216.42	5-2-0-0-0	6,	1	0.00648	12	0.33334	0.26617	4.543	1.20919	b2+;b4+;b5+;b7+;y3+;y4+;y8+;y9+;y10+;y11+;y13+;y14+;Y0++;	y3+;y4+;y9+;y10+;	No
MS2.25917.25917.3.0.dta	3484.51	1740.89	3	FSIJTTNVMGTSLTVR	-	1743.61	7-3-0-0-0	4,	0	0	12	0.22064	0.25803	4.67479	1.20623	y1+;y3+;y5+;y6+;y7+;y8+;y9+;y10+;y11+;y12+;y13+;y15+;	y1+;y7+;y8+;y15+;	No
MS2.26477.26477.3.1.dta	4024.71	1744.89	3	YFTPJKTEDTIFLR	-	2279.83	6-5-0-0-2	5,	3	0.11358	7	0.23218	0.26403	4.55763	1.20336	b2+;y1+;y3+;y5+;y6+;y7+;y8+;Y1+;Y0++;Y1++;	y1+;y5+;y8+;Y1+;	No
MS2.26477.26477.3.0.dta	4023.71	1744.89	3	YFTPJKTEDTIFLR	-	2278.81	6-5-1-0-0	5,	3	0.11358	7	0.23218	0.26403	4.55763	1.20336	b2+;y1+;y3+;y5+;y6+;y7+;y8+;Y1+;Y0++;Y1++;	y1+;y5+;y8+;Y1+;	Yes	1	1	1
MS2.36696.36696.4.0.dta	5165.28	3413.63	4	SLGNVJFTVSAEALESQELCGTEVPSVPEHGR	20,Carbamidomethyl[C];	1751.62	4-4-1-0-0	6,	0	0	5	0.50286	0.26495	4.53585	1.20179	y2+;y3+;y5+;y8+;y9+;	y3+;y5+;y8+;y9+;	No
MS2.33010.33010.5.2.dta	5456.43	3541.72	5	SLGNVJFTVSAEALESQELCGTEVPSVPEHGRK	20,Carbamidomethyl[C];	1914.7	5-4-0-0-2	6,	0	0	10	0.38087	0.26339	4.543	1.1966	b2+;b4+;b5+;y3+;y4+;y6+;y9+;y10+;y13+;y14+;	y4+;y6+;y9+;y10+;	No
MS2.33010.33010.5.1.dta	5455.43	3541.72	5	SLGNVJFTVSAEALESQELCGTEVPSVPEHGRK	20,Carbamidomethyl[C];	1913.68	5-4-1-0-0	6,	0	0	10	0.38087	0.26339	4.543	1.1966	b2+;b4+;b5+;y3+;y4+;y6+;y9+;y10+;y13+;y14+;	y4+;y6+;y9+;y10+;	No
MS2.25990.25990.3.0.dta	3507.52	1593.83	3	SIJTTNVMGTSLTVR	-	1913.68	5-4-1-0-0	3,	4	0.15017	12	0.15938	0.30276	3.94791	1.19528	b2+;b7+;y1+;y3+;y4+;y5+;y7+;y8+;y9+;y10+;y11+;y12+;Y0+;Y0+;Y1+;Y1+;	y1+;y8+;Y1+;	Yes	1	1	1
MS2.35988.35988.4.4.dta	5287.3	3413.63	4	SLGNVJFTVSAEALESQELCGTEVPSVPEHGR	20,Carbamidomethyl[C];	1873.67	6-3-0-0-2	6,	0	0	7	0.43371	0.2634	4.53585	1.19475	y3+;y5+;y7+;y8+;y9+;y12+;y13+;	y3+;y5+;y8+;y13+;	No
MS2.35988.35988.4.0.dta	5286.29	3413.63	4	SLGNVJFTVSAEALESQELCGTEVPSVPEHGR	20,Carbamidomethyl[C];	1872.65	6-3-1-0-0	6,	0	0	7	0.43371	0.2634	4.53585	1.19475	y3+;y5+;y7+;y8+;y9+;y12+;y13+;	y3+;y5+;y8+;y13+;	No
MS2.18852.18852.3.1.dta	4455.87	2339.08	3	GLTFQQJASSMCVPDQDTAIR	12,Carbamidomethyl[C];	2116.76	5-5-1-0-0	7,	0	0	5	0.37949	0.26253	4.543	1.19269	y1+;y4+;y5+;y6+;y8+;	y4+;y5+;y6+;y8+;	No
MS2.3893.3893.3.0.dta	3492.36	776.39	3	EJGTISR	-	2715.96	6-5-2-0-1	2,	7	0.34011	1	0.00682	0.24466	4.84496	1.18536	b2+;Y0+;Y0+;Y1+;Y2+;Y3+;Y4+;Y5+;	Y1+;Y2+;Y3+;Y4+;	Yes	3	1	1
MS2.23385.23385.3.0.dta	4634.93	2339.08	3	GLTFQQJASSMCVPDQDTAIR	12,Carbamidomethyl[C];	2295.82	7-5-0-0-1	7,	0	0	4	0.39825	0.26012	4.543	1.18172	y1+;y4+;y6+;y8+;	y1+;y4+;y6+;y8+;	No
MS2.17873.17873.3.0.dta	3577.43	916.456	3	FYFTPJK	-	2660.96	8-6-0-0-1	6,	4	0.17746	5	0.13103	0.28767	4.10684	1.1814	b2+;b4+;y2+;y3+;y4+;Y0+;Y1+;Y1+;Y3+;	y3+;Y1+;Y1+;	Yes	1	1	1
MS2.3558.3558.3.2.dta	2873.12	796.347	3	NEEYJK	-	2076.75	6-4-0-0-2	5,	4	0.31326	2	0.03779	0.24102	4.87333	1.17456	b2+;b3+;Y0+;Y1+;Y1+;Y4+;	b3+;Y0+;Y1+;Y4+;	No
MS2.28075.28075.4.1.dta	4763.95	2339.08	4	GLTFQQJASSMCVPDQDTAIR	12,Carbamidomethyl[C];	2424.87	6-5-1-0-1	7,	0	0	9	0.37568	0.30564	3.83944	1.17349	y1+;y4+;y5+;y6+;y8+;y9+;y10+;y12+;y13+;	y4+;y6+;y8+;	No
MS2.3830.3830.3.1.dta	3729.47	776.39	3	EJGTISR	-	2953.07	8-6-0-0-3	2,	7	0.26702	2	0.01985	0.24199	4.84496	1.17243	y1+;y5+;Y0+;Y0+;Y1+;Y1+;Y2+;Y3+;Y4+;	Y1+;Y2+;Y3+;Y4+;	No
MS2.3830.3830.3.0.dta	3728.47	776.39	3	EJGTISR	-	2952.05	8-6-1-0-1	2,	7	0.26702	2	0.01985	0.24199	4.84496	1.17243	y1+;y5+;Y0+;Y0+;Y1+;Y1+;Y2+;Y3+;Y4+;	Y1+;Y2+;Y3+;Y4+;	No
MS2.34219.34219.4.1.dta	5286.3	3413.63	4	SLGNVJFTVSAEALESQELCGTEVPSVPEHGR	20,Carbamidomethyl[C];	1872.65	6-3-1-0-0	6,	0	0	7	0.43439	0.25745	4.53585	1.16778	y1+;y3+;y5+;y6+;y8+;y9+;y12+;	y5+;y8+;y9+;y12+;	No
MS2.25540.25540.3.0.dta	3670.6	1593.83	3	SIJTTNVMGTSLTVR	-	2076.75	6-4-0-0-2	3,	4	0.10853	12	0.1754	0.29573	3.94791	1.16751	b3+;b4+;y1+;y3+;y4+;y5+;y7+;y8+;y9+;y10+;y11+;y12+;Y0+;Y0+;Y1+;Y1+;	y7+;y8+;Y1+;	Yes	1	1	1
MS2.9876.9876.3.1.dta	2975.17	769.388	3	YFTPJK	-	2205.79	5-4-1-0-2	5,	4	0.24233	3	0.0867	0.28235	4.13193	1.16663	b2+;y3+;y4+;Y0+;Y1+;Y1+;Y4+;	y3+;Y0+;Y1+;	No
MS2.9876.9876.3.0.dta	2974.17	769.388	3	YFTPJK	-	2204.77	5-4-2-0-0	5,	4	0.24233	3	0.0867	0.28235	4.13193	1.16663	b2+;y3+;y4+;Y0+;Y1+;Y1+;Y4+;	y3+;Y0+;Y1+;	No
MS2.35059.35059.4.0.dta	4962.2	3413.63	4	SLGNVJFTVSAEALESQELCGTEVPSVPEHGR	20,Carbamidomethyl[C];	1548.54	4-3-1-0-0	6,	0	0	5	0.47962	0.25688	4.53585	1.16519	b2+;y3+;y5+;y8+;y9+;	y3+;y5+;y8+;y9+;	No
MS2.4312.4312.3.1.dta	3257.29	993.46	3	JNSDISSTR	-	2263.83	5-5-0-0-3	1,	6	0.18359	5	0.12041	0.28553	4.06094	1.15954	y1+;y3+;y4+;y5+;y6+;Y0+;Y0+;Y1+;Y1+;Y2+;Y3+;	y5+;Y0+;Y1+;	No
MS2.4312.4312.3.0.dta	3256.28	993.46	3	JNSDISSTR	-	2262.81	5-5-1-0-1	1,	6	0.18359	5	0.12041	0.28553	4.06094	1.15954	y1+;y3+;y4+;y5+;y6+;Y0+;Y0+;Y1+;Y1+;Y2+;Y3+;	y5+;Y0+;Y1+;	No
MS2.7602.7602.3.0.dta	3015.18	1189.51	3	EEQYJSTYR	-	1825.66	5-5-0-0-0	5,	4	0.39498	1	0.01846	0.21157	5.45862	1.15486	y1+;Y0+;Y1+;Y1+;Y2+;	y1+;Y0+;Y1+;Y1+;Y2+;	Yes	3	1	1
MS2.29542.29542.4.0.dta	3870.75	1795.01	4	VVLHPJYSQVDIGLIK	-	2075.73	6-4-1-0-0	6,	6	0.15337	9	0.1941	0.30008	3.84588	1.15406	b4+;b11+;y1+;y2+;y4+;y5+;y6+;y7+;y12+;Y0+;Y1+;Y0++;Y1++;Y2++;Y3++;	b4+;y5+;Y1++;	Yes	1	1	1
MS2.29542.29542.4.3.dta	3871.76	1795.01	4	VVLHPJYSQVDIGLIK	-	2076.75	6-4-0-0-2	6,	6	0.15337	9	0.1941	0.30008	3.84588	1.15406	b4+;b11+;y1+;y2+;y4+;y5+;y6+;y7+;y12+;Y0+;Y1+;Y0++;Y1++;Y2++;Y3++;	b4+;y5+;Y1++;	Yes	1	1	1
MS2.15698.15698.2.0.dta	3055.22	1157.52	2	EEQFJSTFR	-	1897.68	4-4-1-0-1	5,	7	0.20419	7	0.08517	0.28372	4.06094	1.15217	b3+;b5+;b6+;y1+;y2+;y3+;y4+;Y0+;Y0+;Y1+;Y1+;Y2+;Y3+;Y4+;	y1+;Y0+;Y1+;	Yes	1	1	1
MS2.15698.15698.2.2.dta	3056.22	1157.52	2	EEQFJSTFR	-	1898.7	4-4-0-0-3	5,	7	0.20419	7	0.08517	0.28372	4.06094	1.15217	b3+;b5+;b6+;y1+;y2+;y3+;y4+;Y0+;Y0+;Y1+;Y1+;Y2+;Y3+;Y4+;	y1+;Y0+;Y1+;	No
MS2.28266.28266.3.1.dta	4763.93	2339.08	3	GLTFQQJASSMCVPDQDTAIR	12,Carbamidomethyl[C];	2424.87	6-5-1-0-1	7,	0	0	5	0.35436	0.25297	4.543	1.14922	y1+;y4+;y6+;y8+;y13+;	y1+;y4+;y6+;y8+;	No
MS2.28266.28266.3.2.dta	4764.95	2339.08	3	GLTFQQJASSMCVPDQDTAIR	12,Carbamidomethyl[C];	2425.89	6-5-0-0-3	7,	0	0	5	0.35436	0.25297	4.543	1.14922	y1+;y4+;y6+;y8+;y13+;	y1+;y4+;y6+;y8+;	No
MS2.32611.32611.4.0.dta	4204.92	1780.02	4	LVPVPITJATLDQITGK	-	2424.87	6-5-1-0-1	8,	2	0.04471	13	0.2223	0.29035	3.94791	1.14628	b2+;b3+;b4+;y3+;y4+;y5+;y6+;y7+;y8+;y9+;y11+;y13+;y15+;Y0+;Y1+;	b3+;y13+;Y1+;	Yes	3	1	1
MS2.17614.17614.4.1.dta	4183.68	1920.85	4	QQJASSMCVPDQDTAIR	8,Carbamidomethyl[C];	2262.81	5-5-1-0-1	3,	2	0.02684	8	0.36443	0.29874	3.8331	1.14509	y1+;y4+;y5+;y6+;y8+;y9+;y10+;y12+;Y0++;Y1++;	y4+;y6+;y8+;	Yes	2	1	1
MS2.14641.14641.2.1.dta	2764.12	1157.52	2	EEQFJSTFR	-	1606.59	4-4-0-0-1	5,	8	0.22795	6	0.06916	0.28184	4.06094	1.14455	b3+;b4+;y1+;y2+;y3+;y4+;Y0+;Y0+;Y1+;Y1+;Y2+;Y2+;Y3+;Y4+;	y1+;Y0+;Y1+;	Yes	1	1	1
MS2.26452.26452.4.1.dta	4186.75	1744.89	4	YFTPJKTEDTIFLR	-	2441.88	7-5-0-0-2	5,	7	0.2114	6	0.1049	0.25074	4.55763	1.14279	b2+;b3+;y1+;y5+;y6+;y8+;Y0+;Y1+;Y0++;Y0++;Y1++;Y1++;Y2++;	y5+;Y1+;Y0++;Y1++;	Yes	1	1	1
MS2.8206.8206.3.1.dta	3473.39	1268.61	3	MVSHHJLTTGAT	-	2204.77	5-4-2-0-0	6,	4	0.15234	6	0.12322	0.24161	4.72484	1.14159	b4+;b5+;b6+;b7+;b8+;y8+;Y0+;Y0+;Y1+;Y1+;	b5+;Y0+;Y0+;Y1+;	Yes	1	1	1
MS2.30012.30012.3.0.dta	4988.07	1744.89	3	YFTPJKTEDTIFLR	-	3243.15	8-6-2-0-1	5,	4	0.1379	7	0.17282	0.2503	4.55763	1.14078	b2+;b3+;y1+;y5+;y6+;y7+;y8+;Y1+;Y0++;Y1++;Y1++;	y5+;Y1+;Y0++;Y1++;	No
MS2.3683.3683.3.1.dta	3222.23	796.347	3	NEEYJK	-	2425.89	6-5-0-0-3	5,	5	0.21208	4	0.07308	0.27559	4.13193	1.13874	b2+;b3+;y2+;y3+;Y0+;Y0+;Y1+;Y1+;Y2+;	b3+;Y0+;Y1+;	No
MS2.3683.3683.3.0.dta	3221.23	796.347	3	NEEYJK	-	2424.87	6-5-1-0-1	5,	5	0.21208	4	0.07308	0.27559	4.13193	1.13874	b2+;b3+;y2+;y3+;Y0+;Y0+;Y1+;Y1+;Y2+;	b3+;Y0+;Y1+;	Yes	1	1	1
MS2.26885.26885.3.2.dta	4528.85	2339.08	3	GLTFQQJASSMCVPDQDTAIR	12,Carbamidomethyl[C];	2189.8	4-4-1-0-3	7,	0	0	4	0.36624	0.25018	4.543	1.13659	y1+;y4+;y6+;y8+;	y1+;y4+;y6+;y8+;	No
MS2.26885.26885.3.0.dta	4527.86	2339.08	3	GLTFQQJASSMCVPDQDTAIR	12,Carbamidomethyl[C];	2188.78	4-4-2-0-1	7,	0	0	4	0.36624	0.25018	4.543	1.13659	y1+;y4+;y6+;y8+;	y1+;y4+;y6+;y8+;	No
MS2.26216.26216.3.0.dta	4633.88	2355.07	3	GLTFQQJASSMCVPDQDTAIR	11,Oxidation[M];12,Carbamidomethyl[C];	2278.81	6-5-1-0-0	7,	0	0	6	0.40409	0.2494	4.55026	1.13483	y1+;y3+;y4+;y5+;y6+;y8+;	y1+;y4+;y6+;y8+;	No
MS2.30217.30217.4.1.dta	4650.12	2695.39	4	MVSHHJLTTGATLINEQWLLTTAK	1,Oxidation[M];	1954.7	4-5-1-0-0	6,	0	0	16	0.24475	0.24844	4.56511	1.13416	y1+;y2+;y3+;y4+;y5+;y6+;y7+;y8+;y9+;y10+;y11+;y12+;y13+;y15+;y16+;y17+;	y3+;y4+;y5+;y6+;	No
MS2.8169.8169.3.1.dta	3372.34	1167.56	3	MVSHHJLTTGA	-	2204.77	5-4-2-0-0	6,	4	0.1523	7	0.12372	0.28207	4.01971	1.13385	b4+;b5+;b6+;b7+;b8+;b9+;y7+;Y0+;Y0+;Y1+;Y1+;	b5+;Y0+;Y1+;	Yes	1	1	1
MS2.8169.8169.3.2.dta	3373.34	1167.56	3	MVSHHJLTTGA	-	2205.79	5-4-1-0-2	6,	4	0.1523	7	0.12372	0.28207	4.01971	1.13385	b4+;b5+;b6+;b7+;b8+;b9+;y7+;Y0+;Y0+;Y1+;Y1+;	b5+;Y0+;Y1+;	No
MS2.37866.37866.5.1.dta	5327.3	3413.63	5	SLGNVJFTVSAEALESQELCGTEVPSVPEHGR	20,Carbamidomethyl[C];	1913.68	5-4-1-0-0	6,	0	0	5	0.45618	0.2498	4.53585	1.13307	y2+;y3+;y5+;y8+;y9+;	y3+;y5+;y8+;y9+;	No
MS2.36026.36026.4.0.dta	5344.35	3413.63	4	SLGNVJFTVSAEALESQELCGTEVPSVPEHGR	20,Carbamidomethyl[C];	1930.69	6-4-0-0-1	6,	0	0	11	0.3794	0.2495	4.53585	1.13168	b2+;b5+;y2+;y3+;y5+;y7+;y9+;y10+;y12+;y13+;y14+;	y2+;y3+;y5+;y9+;	Yes	2	1	1
MS2.9057.9057.3.1.dta	3049.21	769.388	3	YFTPJK	-	2279.83	6-5-0-0-2	5,	2	0.26574	3	0.10452	0.27357	4.13193	1.13036	b3+;y3+;y4+;Y0+;Y1+;	y3+;Y0+;Y1+;	No
MS2.9057.9057.3.0.dta	3048.21	769.388	3	YFTPJK	-	2278.81	6-5-1-0-0	5,	2	0.26574	3	0.10452	0.27357	4.13193	1.13036	b3+;y3+;y4+;Y0+;Y1+;	y3+;Y0+;Y1+;	Yes	3	1	1
MS2.22730.22730.4.0.dta	4634.92	2355.07	4	GLTFQQJASSMCVPDQDTAIR	11,Oxidation[M];12,Carbamidomethyl[C];	2279.83	6-5-0-0-2	7,	0	0	12	0.3218	0.2484	4.55026	1.13028	b3+;y1+;y2+;y3+;y4+;y5+;y6+;y9+;y10+;y11+;y12+;y13+;	y1+;y4+;y5+;y6+;	Yes	2	1	1
MS2.5158.5158.3.0.dta	3547.45	1284.62	3	YKJNSDISSTR	-	2262.81	5-5-1-0-1	3,	6	0.18207	5	0.13123	0.28096	4.01971	1.1294	y1+;y4+;y5+;y7+;y8+;Y0+;Y0+;Y1+;Y1+;Y2+;Y3+;	y5+;Y0+;Y1+;	Yes	3	1	1
MS2.36985.36985.4.0.dta	4979.2	3413.63	4	SLGNVJFTVSAEALESQELCGTEVPSVPEHGR	20,Carbamidomethyl[C];	1565.56	5-3-0-0-1	6,	0	0	9	0.48267	0.29449	3.8331	1.1288	b2+;b4+;y2+;y3+;y5+;y8+;y9+;y10+;y13+;	y3+;y5+;y8+;	Yes	2	1	1
MS2.25504.25504.3.0.dta	3653.57	1593.83	3	SIJTTNVMGTSLTVR	-	2059.73	5-4-1-0-1	3,	4	0.11444	11	0.16845	0.28481	3.94791	1.12441	b2+;b4+;y1+;y3+;y5+;y7+;y8+;y9+;y10+;y11+;y12+;Y0+;Y0+;Y1+;Y1+;	y7+;y8+;Y1+;	Yes	1	1	1
MS2.25504.25504.3.1.dta	3654.57	1593.83	3	SIJTTNVMGTSLTVR	-	2060.76	5-4-0-0-3	3,	4	0.11444	11	0.16845	0.28481	3.94791	1.12441	b2+;b4+;y1+;y3+;y5+;y7+;y8+;y9+;y10+;y11+;y12+;Y0+;Y0+;Y1+;Y1+;	y7+;y8+;Y1+;	No
MS2.30255.30255.3.0.dta	4485.89	1753.93	3	CANLVPVPITJATLDR	1,Carbamidomethyl[C];	2731.96	7-5-2-0-0	11,	1	0.04181	8	0.31352	0.23992	4.67479	1.12156	b2+;b3+;b4+;b5+;b6+;y1+;y4+;y5+;Y1+;	b2+;b3+;b4+;Y1+;	Yes	1	1	1
MS2.30255.30255.3.1.dta	4486.93	1753.93	3	CANLVPVPITJATLDR	1,Carbamidomethyl[C];	2732.98	7-5-1-0-2	11,	1	0.04181	8	0.31352	0.23992	4.67479	1.12156	b2+;b3+;b4+;b5+;b6+;y1+;y4+;y5+;Y1+;	b2+;b3+;b4+;Y1+;	Yes	1	1	1
MS2.16769.16769.3.0.dta	3046.24	841.457	3	VVLHPJY	-	2204.77	5-4-2-0-0	6,	5	0.10168	2	0.12773	0.22976	4.84496	1.11317	b4+;y3+;Y0+;Y0+;Y1+;Y3+;Y5+;	b4+;y3+;Y0+;Y0+;	Yes	3	1	1
MS2.16769.16769.3.1.dta	3047.24	841.457	3	VVLHPJY	-	2205.79	5-4-1-0-2	6,	5	0.10168	2	0.12773	0.22976	4.84496	1.11317	b4+;y3+;Y0+;Y0+;Y1+;Y3+;Y5+;	b4+;y3+;Y0+;Y0+;	No
MS2.31394.31394.4.2.dta	4017.82	1795.01	4	VVLHPJYSQVDIGLIK	-	2222.81	6-4-0-0-3	6,	9	0.11782	10	0.15272	0.28863	3.84588	1.11004	b4+;b11+;y1+;y2+;y3+;y4+;y5+;y6+;y9+;y12+;Y0+;Y1+;Y0++;Y0++;Y2++;Y3++;Y4++;Y5++;Y5++;	b4+;y5+;Y1+;	No
MS2.31394.31394.4.0.dta	4016.82	1795.01	4	VVLHPJYSQVDIGLIK	-	2221.79	6-4-1-0-1	6,	9	0.11782	10	0.15272	0.28863	3.84588	1.11004	b4+;b11+;y1+;y2+;y3+;y4+;y5+;y6+;y9+;y12+;Y0+;Y1+;Y0++;Y0++;Y2++;Y3++;Y4++;Y5++;Y5++;	b4+;y5+;Y1+;	Yes	1	1	1
MS2.31085.31085.4.2.dta	4000.81	1795.01	4	VVLHPJYSQVDIGLIK	-	2205.79	5-4-1-0-2	6,	12	0.08993	21	0.15386	0.36336	3.04454	1.10627	b3+;b4+;b6+;b7+;b9+;b10+;b11+;b12+;b13+;b14+;b15+;y1+;y2+;y3+;y4+;y6+;y7+;y8+;y9+;y10+;y12+;Y0+;Y0+;Y1+;Y1+;Y0++;Y0++;Y1++;Y1++;Y2++;Y3++;Y4++;Y4++;	b4+;Y1++;	No
MS2.31085.31085.4.0.dta	3999.81	1795.01	4	VVLHPJYSQVDIGLIK	-	2204.77	5-4-2-0-0	6,	12	0.08993	21	0.15386	0.36336	3.04454	1.10627	b3+;b4+;b6+;b7+;b9+;b10+;b11+;b12+;b13+;b14+;b15+;y1+;y2+;y3+;y4+;y6+;y7+;y8+;y9+;y10+;y12+;Y0+;Y0+;Y1+;Y1+;Y0++;Y0++;Y1++;Y1++;Y2++;Y3++;Y4++;Y4++;	b4+;Y1++;	Yes	1	1	1
MS2.34992.34992.5.0.dta	5124.25	3413.63	5	SLGNVJFTVSAEALESQELCGTEVPSVPEHGR	20,Carbamidomethyl[C];	1710.6	5-3-1-0-0	6,	0	0	5	0.44652	0.24385	4.53585	1.10608	b2+;y3+;y5+;y8+;y9+;	y3+;y5+;y8+;y9+;	No
MS2.36213.36213.4.1.dta	5166.28	3413.63	4	SLGNVJFTVSAEALESQELCGTEVPSVPEHGR	20,Carbamidomethyl[C];	1752.64	4-4-0-0-2	6,	0	0	5	0.46988	0.24344	4.53585	1.10419	y1+;y2+;y3+;y5+;y8+;	y1+;y3+;y5+;y8+;	No
MS2.22241.22241.4.1.dta	4617.91	2339.08	4	GLTFQQJASSMCVPDQDTAIR	12,Carbamidomethyl[C];	2278.81	6-5-1-0-0	7,	0	0	4	0.34194	0.24305	4.543	1.10417	y4+;y6+;y7+;y8+;	y4+;y6+;y7+;y8+;	No
MS2.5319.5319.4.3.dta	3548.44	1284.62	4	YKJNSDISSTR	-	2263.83	5-5-0-0-3	3,	5	0.18486	2	0.14232	0.21126	5.22533	1.10388	y5+;y7+;Y0+;Y1+;Y2+;Y0++;Y1++;	y5+;y7+;Y0+;Y1+;Y1++;	No
MS2.5319.5319.4.1.dta	3547.45	1284.62	4	YKJNSDISSTR	-	2262.81	5-5-1-0-1	3,	5	0.18486	2	0.14232	0.21126	5.22533	1.10388	y5+;y7+;Y0+;Y1+;Y2+;Y0++;Y1++;	y5+;y7+;Y0+;Y1+;Y1++;	Yes	3	1	1
MS2.31125.31125.3.0.dta	4145.88	1795.01	3	VVLHPJYSQVDIGLIK	-	2350.83	5-4-2-0-1	6,	6	0.04788	11	0.21663	0.28702	3.84588	1.10384	b4+;b7+;b11+;y1+;y2+;y3+;y4+;y5+;y6+;y7+;y12+;Y0+;Y1+;Y0++;Y2++;Y3++;Y5++;	b4+;y4+;y5+;	Yes	1	1	1
MS2.39635.39635.4.1.dta	4630.06	3413.63	4	SLGNVJFTVSAEALESQELCGTEVPSVPEHGR	20,Carbamidomethyl[C];	1216.42	5-2-0-0-0	6,	0	0	5	0.46862	0.24234	4.53585	1.09922	y2+;y3+;y5+;y8+;y14+;	y2+;y3+;y5+;y8+;	No
MS2.35275.35275.4.2.dta	5125.25	3413.63	4	SLGNVJFTVSAEALESQELCGTEVPSVPEHGR	20,Carbamidomethyl[C];	1711.62	5-3-0-0-2	6,	0	0	10	0.44997	0.2864	3.8331	1.09779	b2+;b4+;b7+;y1+;y2+;y3+;y5+;y8+;y9+;y10+;	y3+;y5+;y8+;	No
MS2.35275.35275.4.0.dta	5124.23	3413.63	4	SLGNVJFTVSAEALESQELCGTEVPSVPEHGR	20,Carbamidomethyl[C];	1710.6	5-3-1-0-0	6,	0	0	10	0.44997	0.2864	3.8331	1.09779	b2+;b4+;b7+;y1+;y2+;y3+;y5+;y8+;y9+;y10+;	y3+;y5+;y8+;	No
MS2.30293.30293.4.1.dta	4340.88	1753.93	4	CANLVPVPITJATLDR	1,Carbamidomethyl[C];	2586.92	7-5-1-0-1	11,	1	0.02915	9	0.28225	0.2333	4.67479	1.09062	b2+;b3+;b4+;b5+;b6+;y1+;y4+;y5+;y11+;Y1+;	b2+;b3+;b4+;Y1+;	Yes	1	1	1
MS2.25618.25618.3.1.dta	3468.52	1740.89	3	FSIJTTNVMGTSLTVR	-	1727.61	6-3-0-0-1	4,	0	0	12	0.24832	0.27469	3.95624	1.08675	y1+;y3+;y4+;y5+;y6+;y7+;y8+;y9+;y10+;y11+;y12+;y15+;	y7+;y8+;y15+;	No
MS2.34845.34845.5.0.dta	5286.31	3413.63	5	SLGNVJFTVSAEALESQELCGTEVPSVPEHGR	20,Carbamidomethyl[C];	1872.65	6-3-1-0-0	6,	0	0	4	0.45816	0.23954	4.53585	1.08651	y3+;y5+;y8+;y9+;	y3+;y5+;y8+;y9+;	No
MS2.2503.2503.3.0.dta	2710.04	796.347	3	NEEYJK	-	1913.68	5-4-1-0-0	5,	2	0.31599	2	0.05342	0.22239	4.87333	1.08376	b2+;b3+;Y0+;Y1+;	b2+;b3+;Y0+;Y1+;	Yes	3	1	1
MS2.2503.2503.3.1.dta	2711.04	796.347	3	NEEYJK	-	1914.7	5-4-0-0-2	5,	2	0.31599	2	0.05342	0.22239	4.87333	1.08376	b2+;b3+;Y0+;Y1+;	b2+;b3+;Y0+;Y1+;	No
MS2.4239.4239.3.1.dta	3638.41	776.39	3	EJGTISR	-	2862.02	6-5-2-0-2	2,	7	0.28236	1	0.01026	0.22349	4.84496	1.08282	y1+;Y0+;Y1+;Y1+;Y2+;Y3+;Y4+;Y5+;	Y1+;Y2+;Y3+;Y4+;	No
MS2.4239.4239.3.0.dta	3637.4	776.39	3	EJGTISR	-	2861	6-5-3-0-0	2,	7	0.28236	1	0.01026	0.22349	4.84496	1.08282	y1+;Y0+;Y1+;Y1+;Y2+;Y3+;Y4+;Y5+;	Y1+;Y2+;Y3+;Y4+;	Yes	3	1	1
MS2.30366.30366.4.0.dta	4747.11	1795.01	4	VVLHPJYSQVDIGLIK	-	2952.05	8-6-1-0-1	6,	7	0.12744	7	0.11622	0.23761	4.55026	1.08119	b4+;y2+;y4+;y5+;y6+;y9+;y12+;Y0+;Y1+;Y0++;Y1++;Y2++;Y3++;Y4++;	b4+;y5+;Y1+;Y1++;	Yes	3	1	1
MS2.4398.4398.3.0.dta	3012.24	1284.62	3	YKJNSDISSTR	-	1727.61	6-3-0-0-1	3,	4	0.2335	4	0.11007	0.23444	4.58043	1.07385	y4+;y5+;y7+;y9+;Y0+;Y1+;Y0++;Y1++;	y5+;Y0+;Y1+;Y0++;	Yes	3	1	1
MS2.28388.28388.3.0.dta	4460.87	1744.89	3	YFTPJKTEDTIFLR	-	2715.96	6-5-2-0-1	5,	4	0.08302	11	0.19381	0.27766	3.85241	1.06965	b2+;b3+;y1+;y2+;y3+;y4+;y5+;y6+;y7+;y8+;y9+;Y1+;Y0++;Y0++;Y1++;	y5+;y8+;Y1+;	Yes	1	1	1
MS2.28388.28388.3.1.dta	4461.87	1744.89	3	YFTPJKTEDTIFLR	-	2716.98	6-5-1-0-3	5,	4	0.08302	11	0.19381	0.27766	3.85241	1.06965	b2+;b3+;y1+;y2+;y3+;y4+;y5+;y6+;y7+;y8+;y9+;Y1+;Y0++;Y0++;Y1++;	y5+;y8+;Y1+;	No
MS2.25767.25767.3.1.dta	3524.54	1593.83	3	SIJTTNVMGTSLTVR	-	1930.69	6-4-0-0-1	3,	5	0.15855	16	0.15192	0.34115	3.1303	1.0679	b2+;b4+;b7+;b11+;y1+;y3+;y4+;y5+;y6+;y7+;y8+;y9+;y10+;y11+;y12+;y13+;Y0+;Y0+;Y1+;Y1+;Y2+;	y8+;Y1+;	Yes	1	1	1
MS2.5594.5594.3.0.dta	2979.23	1284.62	3	YKJNSDISSTR	-	1694.6	4-3-1-0-1	3,	3	0.20044	3	0.12397	0.20395	5.22533	1.06569	y4+;y5+;y8+;Y0+;Y1+;Y0++;	y4+;y5+;y8+;Y1+;Y0++;	Yes	3	1	1
MS2.5594.5594.3.1.dta	2980.22	1284.62	3	YKJNSDISSTR	-	1695.62	4-3-0-0-3	3,	3	0.20044	3	0.12397	0.20395	5.22533	1.06569	y4+;y5+;y8+;Y0+;Y1+;Y0++;	y4+;y5+;y8+;Y1+;Y0++;	No
MS2.4917.4917.4.1.dta	3709.5	1284.62	4	YKJNSDISSTR	-	2424.87	6-5-1-0-1	3,	8	0.24534	3	0.07033	0.23122	4.58043	1.05909	y1+;y4+;y5+;Y0+;Y1+;Y2+;Y0++;Y0++;Y1++;Y2++;Y4++;	y5+;Y0+;Y1+;Y1++;	No
MS2.30364.30364.3.0.dta	4323.85	1753.93	3	CANLVPVPITJATLDR	1,Carbamidomethyl[C];	2569.9	6-5-2-0-0	11,	2	0.05161	6	0.29929	0.22639	4.67479	1.0583	b2+;b3+;b4+;b5+;y1+;y11+;Y0+;Y1+;	b2+;b3+;b4+;Y1+;	Yes	3	1	1
MS2.5804.5804.3.0.dta	2979.23	1284.62	3	YKJNSDISSTR	-	1694.6	4-3-1-0-1	3,	4	0.29662	1	0.09744	0.20249	5.22533	1.05808	y5+;Y0+;Y0+;Y1+;Y1++;	y5+;Y0+;Y0+;Y1+;Y1++;	Yes	3	1	1
MS2.5804.5804.3.1.dta	2980.23	1284.62	3	YKJNSDISSTR	-	1695.62	4-3-0-0-3	3,	4	0.29662	1	0.09744	0.20249	5.22533	1.05808	y5+;Y0+;Y0+;Y1+;Y1++;	y5+;Y0+;Y0+;Y1+;Y1++;	No
MS2.23154.23154.3.0.dta	3551.41	1183.54	3	GLTFQQJASSM	-	2367.85	6-4-1-0-2	7,	3	0.02521	13	0.13463	0.26304	4.01971	1.05734	b3+;b5+;b6+;b7+;b8+;b9+;b10+;y1+;y3+;y5+;y6+;y7+;y9+;Y0+;Y0+;Y1+;	b6+;b8+;y1+;	Yes	2	1	1
MS2.30143.30143.4.0.dta	5016.24	2679.39	4	MVSHHJLTTGATLINEQWLLTTAK	-	2336.85	6-6-0-0-1	6,	0	0	9	0.24334	0.20291	5.20854	1.05685	y2+;y3+;y4+;y5+;y6+;y7+;y8+;y9+;y10+;	y3+;y4+;y5+;y6+;y10+;	No
MS2.19286.19286.4.0.dta	4821	2339.08	4	GLTFQQJASSMCVPDQDTAIR	12,Carbamidomethyl[C];	2481.89	6-6-1-0-0	7,	0	0	4	0.45256	0.27523	3.83944	1.05673	y1+;y4+;y6+;y8+;	y4+;y6+;y8+;	No
MS2.7258.7258.2.0.dta	2796.11	1189.51	2	EEQYJSTYR	-	1606.59	4-4-0-0-1	5,	5	0.29534	1	0.02621	0.19277	5.45862	1.05227	y2+;Y0+;Y0+;Y1+;Y1+;Y3+;	y2+;Y0+;Y0+;Y1+;Y3+;	No
MS2.32036.32036.3.3.dta	4819.12	1795.01	3	VVLHPJYSQVDIGLIK	-	3024.07	7-5-2-0-2	6,	5	0.18375	5	0.14337	0.23116	4.55026	1.05182	b4+;b11+;y2+;y4+;y5+;Y0+;Y1+;Y0++;Y1++;Y3++;	b4+;y5+;Y1+;Y1++;	Yes	1	1	1
MS2.3928.3928.2.1.dta	3367.26	796.347	2	NEEYJK	-	2570.93	6-5-1-0-2	5,	2	0.40216	2	0.05987	0.25423	4.13193	1.05045	b2+;b3+;Y0+;Y1+;	b2+;Y0+;Y1+;	No
MS2.3928.3928.2.0.dta	3366.26	796.347	2	NEEYJK	-	2569.9	6-5-2-0-0	5,	2	0.40216	2	0.05987	0.25423	4.13193	1.05045	b2+;b3+;Y0+;Y1+;	b2+;Y0+;Y1+;	No
MS2.3818.3818.3.0.dta	3164.2	796.347	3	NEEYJK	-	2367.85	6-4-1-0-2	5,	3	0.17816	4	0.10222	0.25308	4.13193	1.04572	b2+;b3+;b4+;y3+;Y0+;Y0+;Y1+;	b2+;b3+;Y0+;	Yes	1	1	1
MS2.30440.30440.4.3.dta	4244.83	2184.08	4	LAGKPTHVJVSVVMAEVDGTC	21,Carbamidomethyl[C];	2060.76	5-4-0-0-3	9,	2	0.01027	16	0.22495	0.27276	3.82069	1.04215	b6+;b7+;b8+;b10+;b12+;b13+;b14+;b16+;y1+;y2+;y3+;y4+;y5+;y6+;y7+;y8+;Y0++;Y1++;	b8+;y1+;y2+;	No
MS2.30440.30440.4.0.dta	4243.83	2184.08	4	LAGKPTHVJVSVVMAEVDGTC	21,Carbamidomethyl[C];	2059.73	5-4-1-0-1	9,	2	0.01027	16	0.22495	0.27276	3.82069	1.04215	b6+;b7+;b8+;b10+;b12+;b13+;b14+;b16+;y1+;y2+;y3+;y4+;y5+;y6+;y7+;y8+;Y0++;Y1++;	b8+;y1+;y2+;	Yes	3	1	1
MS2.26278.26278.3.0.dta	4617.92	2339.08	3	GLTFQQJASSMCVPDQDTAIR	12,Carbamidomethyl[C];	2278.81	6-5-1-0-0	7,	0	0	4	0.3193	0.2292	4.543	1.04125	y1+;y4+;y6+;y8+;	y1+;y4+;y6+;y8+;	No
MS2.26278.26278.3.1.dta	4618.9	2339.08	3	GLTFQQJASSMCVPDQDTAIR	12,Carbamidomethyl[C];	2279.83	6-5-0-0-2	7,	0	0	4	0.3193	0.2292	4.543	1.04125	y1+;y4+;y6+;y8+;	y1+;y4+;y6+;y8+;	No
MS2.32833.32833.5.0.dta	5414.41	3541.72	5	SLGNVJFTVSAEALESQELCGTEVPSVPEHGRK	20,Carbamidomethyl[C];	1872.65	6-3-1-0-0	6,	1	0.00371	15	0.30287	0.27062	3.83944	1.03901	b2+;b3+;b4+;b5+;b6+;b7+;y3+;y4+;y5+;y6+;y7+;y10+;y11+;y13+;y14+;Y1++;	b5+;y4+;y6+;	No
MS2.5053.5053.3.1.dta	3142.28	1284.62	3	YKJNSDISSTR	-	1857.68	5-3-0-0-3	3,	4	0.2273	2	0.10322	0.19834	5.22533	1.03641	y5+;y8+;Y0+;Y1+;Y0++;Y1++;	y5+;Y0+;Y1+;Y0++;Y1++;	No
MS2.5053.5053.3.0.dta	3141.28	1284.62	3	YKJNSDISSTR	-	1856.66	5-3-1-0-1	3,	4	0.2273	2	0.10322	0.19834	5.22533	1.03641	y5+;y8+;Y0+;Y1+;Y0++;Y1++;	y5+;Y0+;Y1+;Y0++;Y1++;	Yes	3	1	1
MS2.14325.14325.3.0.dta	3512.48	958.557	3	TPLTAJITK	-	2553.91	5-5-2-0-1	6,	3	0.27444	2	0.05691	0.21579	4.79306	1.03431	b6+;b7+;Y0+;Y0+;Y1+;	b6+;Y0+;Y0+;Y1+;	No
MS2.14325.14325.3.1.dta	3513.48	958.557	3	TPLTAJITK	-	2554.93	5-5-1-0-3	6,	3	0.27444	2	0.05691	0.21579	4.79306	1.03431	b6+;b7+;Y0+;Y0+;Y1+;	b6+;Y0+;Y0+;Y1+;	No
MS2.37262.37262.4.1.dta	5287.3	3413.63	4	SLGNVJFTVSAEALESQELCGTEVPSVPEHGR	20,Carbamidomethyl[C];	1873.67	6-3-0-0-2	6,	0	0	5	0.54944	0.26901	3.8331	1.03112	b4+;y2+;y3+;y5+;y8+;	y3+;y5+;y8+;	No
MS2.15610.15610.4.1.dta	3866.59	1458.73	4	NLFLJHSEJATAK	-	2407.85	5-5-2-0-0	5,	6	0.29154	2	0.03974	0.19847	5.19226	1.03051	b2+;b3+;Y1+;Y2+;Y1++;Y1++;Y2++;Y2++;	b3+;Y1+;Y2+;Y1++;Y2++;	No
MS2.35881.35881.4.1.dta	5327.34	3413.63	4	SLGNVJFTVSAEALESQELCGTEVPSVPEHGR	20,Carbamidomethyl[C];	1913.68	5-4-1-0-0	6,	0	0	7	0.45278	0.26853	3.8331	1.02929	y1+;y2+;y3+;y5+;y8+;y9+;y13+;	y3+;y5+;y8+;	No
MS2.35881.35881.4.3.dta	5328.33	3413.63	4	SLGNVJFTVSAEALESQELCGTEVPSVPEHGR	20,Carbamidomethyl[C];	1914.7	5-4-0-0-2	6,	0	0	7	0.45278	0.26853	3.8331	1.02929	y1+;y2+;y3+;y5+;y8+;y9+;y13+;	y3+;y5+;y8+;	No
MS2.31160.31160.4.3.dta	4365.94	1795.01	4	VVLHPJYSQVDIGLIK	-	2570.93	6-5-1-0-2	6,	8	0.13378	7	0.16286	0.267	3.84588	1.02685	b4+;y1+;y2+;y4+;y5+;y9+;y12+;Y0+;Y1+;Y0++;Y0++;Y1++;Y2++;Y3++;Y4++;	b4+;y5+;Y1++;	No
MS2.31160.31160.4.0.dta	4364.94	1795.01	4	VVLHPJYSQVDIGLIK	-	2569.9	6-5-2-0-0	6,	8	0.13378	7	0.16286	0.267	3.84588	1.02685	b4+;y1+;y2+;y4+;y5+;y9+;y12+;Y0+;Y1+;Y0++;Y0++;Y1++;Y2++;Y3++;Y4++;	b4+;y5+;Y1++;	Yes	1	1	1
MS2.31160.31160.4.4.dta	4366.94	1795.01	4	VVLHPJYSQVDIGLIK	-	2571.95	6-5-0-0-4	6,	8	0.13378	7	0.16286	0.267	3.84588	1.02685	b4+;y1+;y2+;y4+;y5+;y9+;y12+;Y0+;Y1+;Y0++;Y0++;Y1++;Y2++;Y3++;Y4++;	b4+;y5+;Y1++;	Yes	1	1	1
MS2.28254.28254.4.1.dta	4843.01	1744.89	4	YFTPJKTEDTIFLR	-	3098.11	8-6-1-0-2	5,	7	0.2361	3	0.08569	0.22421	4.55763	1.02187	b2+;y5+;y8+;Y0+;Y1+;Y1+;Y0++;Y1++;Y2++;Y4++;	y5+;Y1+;Y0++;Y1++;	No
MS2.6579.6579.3.0.dta	3344.36	1284.62	3	YKJNSDISSTR	-	2059.73	5-4-1-0-1	3,	4	0.14937	5	0.14389	0.2542	4.01971	1.02183	y1+;y3+;y4+;y5+;y7+;Y0+;Y0+;Y1+;Y2+;	y5+;Y0+;Y1+;	Yes	3	1	1
MS2.6579.6579.3.1.dta	3345.37	1284.62	3	YKJNSDISSTR	-	2060.76	5-4-0-0-3	3,	4	0.14937	5	0.14389	0.2542	4.01971	1.02183	y1+;y3+;y4+;y5+;y7+;Y0+;Y0+;Y1+;Y2+;	y5+;Y0+;Y1+;	No
MS2.27464.27464.3.0.dta	4737.98	2184.08	3	LAGKPTHVJVSVVMAEVDGTC	21,Carbamidomethyl[C];	2553.91	5-5-2-0-1	9,	0	0	7	0.29351	0.19732	5.16114	1.01842	b7+;b8+;b10+;y1+;y2+;y4+;y5+;	b8+;y1+;y2+;y4+;y5+;	Yes	3	1	1
MS2.14420.14420.2.0.dta	2764.12	1157.52	2	EEQFJSTFR	-	1606.59	4-4-0-0-1	5,	5	0.11607	5	0.08974	0.21209	4.79306	1.01657	b3+;y1+;y2+;y3+;y4+;Y0+;Y0+;Y1+;Y1+;Y2+;	b3+;y1+;Y0+;Y1+;	Yes	1	1	1
MS2.15881.15881.3.0.dta	3055.22	1157.52	3	EEQFJSTFR	-	1897.68	4-4-1-0-1	5,	7	0.31666	1	0.00961	0.21182	4.79306	1.01528	y1+;Y0+;Y0+;Y1+;Y1+;Y2+;Y3+;Y4+;	Y0+;Y0+;Y1+;Y1+;	No
MS2.15881.15881.3.1.dta	3056.23	1157.52	3	EEQFJSTFR	-	1898.7	4-4-0-0-3	5,	7	0.31666	1	0.00961	0.21182	4.79306	1.01528	y1+;Y0+;Y0+;Y1+;Y1+;Y2+;Y3+;Y4+;	Y0+;Y0+;Y1+;Y1+;	No
MS2.24158.24158.3.0.dta	3159.39	1593.83	3	SIJTTNVMGTSLTVR	-	1565.56	5-3-0-0-1	3,	2	0.17377	3	0.15832	0.19088	5.3185	1.01521	y1+;y7+;y8+;Y0+;Y1+;	y1+;y7+;y8+;Y0+;Y1+;	No
MS2.5693.5693.3.0.dta	3344.36	1284.62	3	YKJNSDISSTR	-	2059.73	5-4-1-0-1	3,	4	0.18495	4	0.12782	0.25224	4.01971	1.01394	y4+;y5+;y7+;y9+;Y0+;Y0+;Y1+;Y1+;	y5+;Y0+;Y1+;	Yes	3	1	1
MS2.5693.5693.3.1.dta	3345.36	1284.62	3	YKJNSDISSTR	-	2060.76	5-4-0-0-3	3,	4	0.18495	4	0.12782	0.25224	4.01971	1.01394	y4+;y5+;y7+;y9+;Y0+;Y0+;Y1+;Y1+;	y5+;Y0+;Y1+;	No
MS2.9308.9308.3.0.dta	2683.08	769.388	3	YFTPJK	-	1913.68	5-4-1-0-0	5,	2	0.27561	1	0.12133	0.2424	4.16655	1.00996	y3+;Y0+;Y1+;	y3+;Y0+;Y1+;	Yes	3	1	1
MS2.9308.9308.3.1.dta	2684.08	769.388	3	YFTPJK	-	1914.7	5-4-0-0-2	5,	2	0.27561	1	0.12133	0.2424	4.16655	1.00996	y3+;Y0+;Y1+;	y3+;Y0+;Y1+;	No
MS2.27501.27501.4.1.dta	4534.93	2184.08	4	LAGKPTHVJVSVVMAEVDGTC	21,Carbamidomethyl[C];	2350.83	5-4-2-0-1	9,	3	0.00866	17	0.20652	0.2641	3.82069	1.00905	b4+;b7+;b8+;b10+;b12+;b13+;b14+;b16+;b17+;b18+;y1+;y2+;y4+;y6+;y7+;y8+;y9+;Y0++;Y1++;Y1++;	y1+;y2+;y4+;	Yes	3	1	1
MS2.28711.28711.4.1.dta	4032.75	1753.93	4	CANLVPVPITJATLDR	1,Carbamidomethyl[C];	2278.81	6-5-1-0-0	11,	1	0.05666	5	0.32017	0.21563	4.67479	1.00801	b2+;b3+;b4+;b5+;y1+;Y1+;	b2+;b3+;b4+;Y1+;	Yes	3	1	1
MS2.35918.35918.4.1.dta	5165.29	3413.63	4	SLGNVJFTVSAEALESQELCGTEVPSVPEHGR	20,Carbamidomethyl[C];	1751.62	4-4-1-0-0	6,	0	0	7	0.43614	0.2629	3.8331	1.00773	y3+;y5+;y7+;y8+;y9+;y12+;y13+;	y3+;y5+;y8+;	No
MS2.37959.37959.4.1.dta	4792.12	3413.63	4	SLGNVJFTVSAEALESQELCGTEVPSVPEHGR	20,Carbamidomethyl[C];	1378.48	6-2-0-0-0	6,	0	0	4	0.40284	0.22211	4.53585	1.00748	y3+;y5+;y8+;y9+;	y3+;y5+;y8+;y9+;	No
MS2.26140.26140.3.0.dta	4243.82	2184.08	3	LAGKPTHVJVSVVMAEVDGTC	21,Carbamidomethyl[C];	2059.73	5-4-1-0-1	9,	0	0	7	0.28703	0.19499	5.16114	1.00639	b7+;b8+;b10+;y1+;y2+;y4+;y5+;	b8+;y1+;y2+;y4+;y5+;	Yes	2	1	1
MS2.26140.26140.3.1.dta	4244.84	2184.08	3	LAGKPTHVJVSVVMAEVDGTC	21,Carbamidomethyl[C];	2060.76	5-4-0-0-3	9,	0	0	7	0.28703	0.19499	5.16114	1.00639	b7+;b8+;b10+;y1+;y2+;y4+;y5+;	b8+;y1+;y2+;y4+;y5+;	No
MS2.12903.12903.3.0.dta	2707.14	1166.61	3	STGKPTLYJVS	-	1540.53	7-2-0-0-0	9,	2	0.27392	2	0.09011	0.21175	4.74648	1.00508	b9+;b10+;Y0+;Y1+;	b9+;b10+;Y0+;Y1+;	Yes	3	1	1
MS2.30182.30182.4.0.dta	4622.93	1744.89	4	YFTPJKTEDTIFLR	-	2878.02	7-5-2-0-1	5,	9	0.13176	9	0.09663	0.26043	3.85241	1.00328	b2+;b3+;y2+;y5+;y6+;y7+;y8+;y9+;y11+;Y0+;Y0+;Y1+;Y0++;Y0++;Y1++;Y1++;Y2++;Y3++;	y5+;Y1+;Y1++;	Yes	1	1	1
MS2.33418.33418.3.1.dta	4351.97	1780.02	3	LVPVPITJATLDQITGK	-	2571.95	6-5-0-0-4	8,	2	0.02268	12	0.18341	0.25412	3.94791	1.00324	b3+;y3+;y4+;y5+;y6+;y7+;y8+;y9+;y10+;y11+;y13+;y15+;Y0+;Y1+;	y3+;y8+;y13+;	Yes	1	1	1
MS2.33418.33418.3.0.dta	4349.96	1780.02	3	LVPVPITJATLDQITGK	-	2569.9	6-5-2-0-0	8,	2	0.02268	12	0.18341	0.25412	3.94791	1.00324	b3+;y3+;y4+;y5+;y6+;y7+;y8+;y9+;y10+;y11+;y13+;y15+;Y0+;Y1+;	y3+;y8+;y13+;	Yes	1	1	1
MS2.36098.36098.4.0.dta	4920.2	3541.72	4	SLGNVJFTVSAEALESQELCGTEVPSVPEHGRK	20,Carbamidomethyl[C];	1378.48	6-2-0-0-0	6,	0	0	6	0.37329	0.21999	4.543	0.99941	b2+;y3+;y4+;y6+;y9+;y10+;	y4+;y6+;y9+;y10+;	Yes	3	1	1
MS2.9468.9468.3.0.dta	3704.44	769.388	3	YFTPJK	-	2935.04	7-6-2-0-0	5,	3	0.29475	1	0.07749	0.24168	4.13193	0.99861	y3+;Y0+;Y1+;Y1+;	y3+;Y0+;Y1+;	Yes	3	1	1
MS2.28311.28311.4.0.dta	4460.86	1744.89	4	YFTPJKTEDTIFLR	-	2715.96	6-5-2-0-1	5,	6	0.15175	8	0.1271	0.25887	3.85241	0.99726	b2+;y1+;y3+;y5+;y6+;y7+;y8+;y9+;Y0+;Y1+;Y0++;Y0++;Y1++;Y2++;	y5+;Y1+;Y1++;	Yes	1	1	1
MS2.4706.4706.2.0.dta	3142.27	1284.62	2	YKJNSDISSTR	-	1857.68	5-3-0-0-3	3,	1	0.11522	3	0.21545	0.21002	4.74648	0.99686	y1+;y4+;y5+;Y1+;	y1+;y4+;y5+;Y1+;	No
MS2.8365.8365.3.0.dta	3575.4	769.388	3	YFTPJK	-	2805.99	8-6-1-0-0	5,	2	0.39257	1	0.04223	0.24099	4.13193	0.99574	y3+;Y0+;Y1+;	y3+;Y0+;Y1+;	No
MS2.8365.8365.3.1.dta	3576.43	769.388	3	YFTPJK	-	2807.01	8-6-0-0-2	5,	2	0.39257	1	0.04223	0.24099	4.13193	0.99574	y3+;Y0+;Y1+;	y3+;Y0+;Y1+;	No
MS2.26767.26767.3.0.dta	4638.87	1920.85	3	QQJASSMCVPDQDTAIR	8,Carbamidomethyl[C];	2717.98	8-7-0-0-0	3,	0	0	6	0.29208	0.2077	4.74616	0.98578	y1+;y3+;y4+;y5+;y6+;y8+;	y1+;y4+;y6+;y8+;	No
MS2.37478.37478.4.1.dta	4792.13	3413.63	4	SLGNVJFTVSAEALESQELCGTEVPSVPEHGR	20,Carbamidomethyl[C];	1378.48	6-2-0-0-0	6,	0	0	3	0.57138	0.25688	3.8331	0.98463	y3+;y5+;y8+;	y3+;y5+;y8+;	Yes	3	1	1
MS2.25878.25878.3.2.dta	3468.49	1740.89	3	FSIJTTNVMGTSLTVR	-	1727.61	6-3-0-0-1	4,	0	0	11	0.22031	0.2486	3.95624	0.98353	y1+;y3+;y5+;y7+;y8+;y9+;y10+;y11+;y12+;y13+;y15+;	y7+;y8+;y15+;	No
MS2.19450.19450.5.0.dta	4455.85	2339.08	5	GLTFQQJASSMCVPDQDTAIR	12,Carbamidomethyl[C];	2116.76	5-5-1-0-0	7,	0	0	4	0.40233	0.25548	3.83944	0.98088	y1+;y4+;y6+;y8+;	y4+;y6+;y8+;	No
MS2.7542.7542.3.0.dta	3344.37	1284.62	3	YKJNSDISSTR	-	2059.73	5-4-1-0-1	3,	3	0.16965	3	0.10185	0.2065	4.74648	0.98014	y4+;y5+;y7+;Y0+;Y0+;Y1+;	y5+;Y0+;Y0+;Y1+;	Yes	3	1	1
MS2.7542.7542.3.1.dta	3345.37	1284.62	3	YKJNSDISSTR	-	2060.76	5-4-0-0-3	3,	3	0.16965	3	0.10185	0.2065	4.74648	0.98014	y4+;y5+;y7+;Y0+;Y0+;Y1+;	y5+;Y0+;Y0+;Y1+;	No
MS2.30256.30256.5.2.dta	4690.06	2679.39	5	MVSHHJLTTGATLINEQWLLTTAK	-	2010.69	9-2-0-0-1	6,	0	0	7	0.27084	0.1877	5.20854	0.97766	y1+;y2+;y3+;y4+;y5+;y6+;y7+;	y3+;y4+;y5+;y6+;y7+;	No
MS2.28206.28206.3.1.dta	4706.95	2339.08	3	GLTFQQJASSMCVPDQDTAIR	12,Carbamidomethyl[C];	2367.85	6-4-1-0-2	7,	0	0	4	0.28521	0.21517	4.543	0.9775	y1+;y4+;y6+;y8+;	y1+;y4+;y6+;y8+;	No
MS2.28206.28206.3.0.dta	4705.92	2339.08	3	GLTFQQJASSMCVPDQDTAIR	12,Carbamidomethyl[C];	2366.83	6-4-2-0-0	7,	0	0	4	0.28521	0.21517	4.543	0.9775	y1+;y4+;y6+;y8+;	y1+;y4+;y6+;y8+;	No
MS2.4853.4853.3.1.dta	3490.43	1284.62	3	YKJNSDISSTR	-	2205.79	5-4-1-0-2	3,	3	0.18324	4	0.14205	0.24317	4.01971	0.97747	y1+;y4+;y5+;y8+;Y0+;Y1+;Y2+;	y5+;Y0+;Y1+;	No
MS2.26364.26364.3.0.dta	3345.47	1593.83	3	SIJTTNVMGTSLTVR	-	1751.62	4-4-1-0-0	3,	4	0.1387	7	0.15003	0.24739	3.94791	0.97667	y1+;y7+;y8+;y9+;y10+;y11+;y12+;Y0+;Y0+;Y1+;Y1+;	y1+;y8+;Y1+;	Yes	1	1	1
MS2.26364.26364.3.3.dta	3346.46	1593.83	3	SIJTTNVMGTSLTVR	-	1752.64	4-4-0-0-2	3,	4	0.1387	7	0.15003	0.24739	3.94791	0.97667	y1+;y7+;y8+;y9+;y10+;y11+;y12+;Y0+;Y0+;Y1+;Y1+;	y1+;y8+;Y1+;	No
MS2.25579.25579.3.1.dta	3451.49	1593.83	3	SIJTTNVMGTSLTVR	-	1857.68	5-3-0-0-3	3,	1	0.12238	6	0.16821	0.20874	4.66539	0.97386	y1+;y3+;y7+;y8+;y9+;y11+;Y1+;	y1+;y7+;y8+;Y1+;	No
MS2.25579.25579.3.0.dta	3450.49	1593.83	3	SIJTTNVMGTSLTVR	-	1856.66	5-3-1-0-1	3,	1	0.12238	6	0.16821	0.20874	4.66539	0.97386	y1+;y3+;y7+;y8+;y9+;y11+;Y1+;	y1+;y7+;y8+;Y1+;	Yes	3	1	1
MS2.30143.30143.4.2.dta	5015.25	2695.39	4	MVSHHJLTTGATLINEQWLLTTAK	1,Oxidation[M];	2319.84	5-6-1-0-0	6,	0	0	9	0.24334	0.18607	5.20854	0.96915	y2+;y3+;y4+;y5+;y6+;y7+;y8+;y9+;y10+;	y3+;y4+;y5+;y6+;y10+;	No
MS2.30661.30661.5.1.dta	4651.11	2679.39	5	MVSHHJLTTGATLINEQWLLTTAK	-	1971.72	5-5-0-0-1	6,	0	0	7	0.30834	0.21213	4.56511	0.96842	y2+;y3+;y4+;y5+;y6+;y7+;y10+;	y4+;y5+;y6+;y10+;	No
MS2.4040.4040.3.0.dta	3674.39	796.347	3	NEEYJK	-	2878.02	7-5-2-0-1	5,	5	0.12064	4	0.0716	0.23366	4.13193	0.96548	b2+;b3+;y2+;y3+;Y0+;Y0+;Y1+;Y1+;Y2+;	b3+;Y0+;Y1+;	Yes	1	1	1
MS2.37741.37741.4.1.dta	4995.21	3413.63	4	SLGNVJFTVSAEALESQELCGTEVPSVPEHGR	20,Carbamidomethyl[C];	1581.56	6-3-0-0-0	6,	0	0	3	0.55754	0.25069	3.8331	0.96091	y3+;y5+;y8+;	y3+;y5+;y8+;	No
MS2.32322.32322.5.0.dta	5123.31	3541.72	5	SLGNVJFTVSAEALESQELCGTEVPSVPEHGRK	20,Carbamidomethyl[C];	1581.56	6-3-0-0-0	6,	0	0	11	0.24855	0.21142	4.543	0.96048	b2+;b4+;b5+;b8+;y3+;y4+;y7+;y10+;y11+;y13+;y14+;	b2+;b4+;y4+;y10+;	No
MS2.27987.27987.4.1.dta	4843.02	1744.89	4	YFTPJKTEDTIFLR	-	3098.11	8-6-1-0-2	5,	9	0.1639	6	0.10981	0.2492	3.85241	0.96001	b2+;y1+;y5+;y6+;y8+;y9+;Y0+;Y1+;Y0++;Y0++;Y1++;Y1++;Y2++;Y3++;Y4++;	y5+;Y1+;Y1++;	Yes	1	1	1
MS2.3794.3794.3.0.dta	3711.44	776.39	3	EJGTISR	-	2935.04	7-6-2-0-0	2,	6	0.29094	2	0.01448	0.23354	4.10684	0.95911	b2+;y5+;Y0+;Y1+;Y1+;Y2+;Y3+;Y4+;	Y1+;Y2+;Y4+;	Yes	3	1	1
MS2.3794.3794.3.1.dta	3712.44	776.39	3	EJGTISR	-	2936.06	7-6-1-0-2	2,	6	0.29094	2	0.01448	0.23354	4.10684	0.95911	b2+;y5+;Y0+;Y1+;Y1+;Y2+;Y3+;Y4+;	Y1+;Y2+;Y4+;	No
MS2.38080.38080.4.1.dta	5344.35	3413.63	4	SLGNVJFTVSAEALESQELCGTEVPSVPEHGR	20,Carbamidomethyl[C];	1930.69	6-4-0-0-1	6,	0	0	4	0.52016	0.24895	3.8331	0.95425	y2+;y3+;y5+;y8+;	y3+;y5+;y8+;	No
MS2.22731.22731.4.1.dta	4430.8	2355.07	4	GLTFQQJASSMCVPDQDTAIR	11,Oxidation[M];12,Carbamidomethyl[C];	2075.73	6-4-1-0-0	7,	0	0	9	0.32488	0.24696	3.84588	0.94976	b13+;y1+;y4+;y5+;y6+;y8+;y9+;y10+;y13+;	y4+;y6+;y8+;	No
MS2.5270.5270.3.0.dta	3838.54	1284.62	3	YKJNSDISSTR	-	2553.91	5-5-2-0-1	3,	5	0.12239	8	0.14523	0.29707	3.19058	0.94783	y1+;y3+;y4+;y5+;y6+;y7+;y8+;y9+;Y0+;Y0+;Y1+;Y1+;Y2+;	y5+;Y1+;	Yes	1	1	1
MS2.5270.5270.3.1.dta	3839.54	1284.62	3	YKJNSDISSTR	-	2554.93	5-5-1-0-3	3,	5	0.12239	8	0.14523	0.29707	3.19058	0.94783	y1+;y3+;y4+;y5+;y6+;y7+;y8+;y9+;Y0+;Y0+;Y1+;Y1+;Y2+;	y5+;Y1+;	No
MS2.9961.9961.4.1.dta	4240.7	1920.85	4	QQJASSMCVPDQDTAIR	8,Carbamidomethyl[C];	2319.84	5-6-1-0-0	3,	0	0	4	0.43396	0.24698	3.8331	0.94672	y1+;y4+;y6+;y8+;	y4+;y6+;y8+;	No
MS2.30477.30477.4.0.dta	4463.94	2184.08	4	LAGKPTHVJVSVVMAEVDGTC	21,Carbamidomethyl[C];	2279.83	6-5-0-0-2	9,	2	0.01859	14	0.20616	0.24761	3.82069	0.94603	b4+;b7+;b8+;b10+;b12+;b13+;y1+;y2+;y3+;y4+;y5+;y6+;y7+;y8+;Y1++;Y1++;	y1+;y2+;y5+;	No
MS2.31803.31803.3.0.dta	4000.78	1795.01	3	VVLHPJYSQVDIGLIK	-	2205.79	5-4-1-0-2	6,	0	0	12	0.20178	0.20745	4.55026	0.94396	b2+;b3+;b4+;b6+;b7+;y1+;y2+;y3+;y4+;y5+;y6+;y7+;	b4+;y2+;y4+;y5+;	No
MS2.8315.8315.3.0.dta	3344.37	1284.62	3	YKJNSDISSTR	-	2059.73	5-4-1-0-1	3,	3	0.16535	2	0.12093	0.19864	4.74648	0.94283	y4+;y5+;Y0+;Y0+;Y1+;	y4+;y5+;Y0+;Y1+;	Yes	3	1	1
MS2.8315.8315.3.1.dta	3345.37	1284.62	3	YKJNSDISSTR	-	2060.76	5-4-0-0-3	3,	3	0.16535	2	0.12093	0.19864	4.74648	0.94283	y4+;y5+;Y0+;Y0+;Y1+;	y4+;y5+;Y0+;Y1+;	No
MS2.6433.6433.3.0.dta	2958.16	1189.51	3	EEQYJSTYR	-	1768.64	5-4-0-0-1	5,	4	0.32413	1	0.03924	0.19663	4.79306	0.94244	y1+;Y0+;Y0+;Y1+;Y1+;	y1+;Y0+;Y1+;Y1+;	No
MS2.4534.4534.3.1.dta	3215.32	1284.62	3	YKJNSDISSTR	-	1930.69	6-4-0-0-1	3,	3	0.09183	6	0.14191	0.23428	4.01971	0.94175	b3+;y1+;y4+;y5+;y8+;y9+;Y0+;Y1+;Y1+;	y5+;Y0+;Y1+;	Yes	1	1	1
MS2.4150.4150.2.0.dta	2866.12	993.46	2	JNSDISSTR	-	1872.65	6-3-1-0-0	1,	4	0.19596	2	0.13089	0.23165	4.06094	0.94073	y1+;y5+;Y0+;Y0+;Y1+;Y2+;	y5+;Y0+;Y1+;	No
MS2.4150.4150.2.1.dta	2867.12	993.46	2	JNSDISSTR	-	1873.67	6-3-0-0-2	1,	4	0.19596	2	0.13089	0.23165	4.06094	0.94073	y1+;y5+;Y0+;Y0+;Y1+;Y2+;	y5+;Y0+;Y1+;	No
MS2.3647.3647.3.0.dta	3437.37	776.39	3	EJGTISR	-	2660.96	8-6-0-0-1	2,	7	0.25253	2	0.01958	0.22896	4.10684	0.9403	b2+;y1+;Y0+;Y0+;Y1+;Y1+;Y2+;Y3+;Y4+;	Y1+;Y2+;Y3+;	No
MS2.30515.30515.3.0.dta	4243.83	2184.08	3	LAGKPTHVJVSVVMAEVDGTC	21,Carbamidomethyl[C];	2059.73	5-4-1-0-1	9,	0	0	13	0.24779	0.24503	3.82069	0.93617	b7+;b8+;b9+;b10+;b12+;b13+;b16+;y1+;y2+;y3+;y4+;y5+;y6+;	b8+;y1+;y2+;	Yes	2	1	1
MS2.30515.30515.3.1.dta	4244.83	2184.08	3	LAGKPTHVJVSVVMAEVDGTC	21,Carbamidomethyl[C];	2060.76	5-4-0-0-3	9,	0	0	13	0.24779	0.24503	3.82069	0.93617	b7+;b8+;b9+;b10+;b12+;b13+;b16+;y1+;y2+;y3+;y4+;y5+;y6+;	b8+;y1+;y2+;	No
MS2.4497.4497.3.0.dta	3000.18	940.437	3	YKJNSDIS	-	2059.73	5-4-1-0-1	3,	4	0.17078	4	0.04608	0.22897	4.08324	0.93494	b3+;b6+;b7+;y6+;Y0+;Y0+;Y1+;Y1+;	b7+;Y0+;Y1+;	Yes	1	1	1
MS2.4497.4497.3.1.dta	3001.19	940.437	3	YKJNSDIS	-	2060.76	5-4-0-0-3	3,	4	0.17078	4	0.04608	0.22897	4.08324	0.93494	b3+;b6+;b7+;y6+;Y0+;Y0+;Y1+;Y1+;	b7+;Y0+;Y1+;	Yes	1	1	1
MS2.4484.4484.3.0.dta	3198.24	993.46	3	JNSDISSTR	-	2204.77	5-4-2-0-0	1,	4	0.1465	3	0.13237	0.2299	4.06094	0.93359	y1+;y4+;y5+;Y0+;Y1+;Y4+;Y5+;	y5+;Y1+;Y4+;	No
MS2.30824.30824.3.1.dta	4732.07	1795.01	3	VVLHPJYSQVDIGLIK	-	2937.08	7-6-0-0-4	6,	3	0.06978	9	0.16886	0.24259	3.84588	0.93298	b2+;b4+;b11+;y2+;y4+;y5+;y6+;y9+;y12+;Y1+;Y0++;Y1++;	b4+;y5+;Y1++;	Yes	1	1	1
MS2.30824.30824.3.0.dta	4730.07	1795.01	3	VVLHPJYSQVDIGLIK	-	2935.04	7-6-2-0-0	6,	3	0.06978	9	0.16886	0.24259	3.84588	0.93298	b2+;b4+;b11+;y2+;y4+;y5+;y6+;y9+;y12+;Y1+;Y0++;Y1++;	b4+;y5+;Y1++;	Yes	1	1	1
MS2.6134.6134.3.0.dta	3344.36	1284.62	3	YKJNSDISSTR	-	2059.73	5-4-1-0-1	3,	3	0.15574	4	0.12738	0.2313	4.01971	0.92974	y4+;y5+;y7+;y9+;Y0+;Y1+;Y1+;	y5+;Y0+;Y1+;	Yes	3	1	1
MS2.6134.6134.3.1.dta	3345.37	1284.62	3	YKJNSDISSTR	-	2060.76	5-4-0-0-3	3,	3	0.15574	4	0.12738	0.2313	4.01971	0.92974	y4+;y5+;y7+;y9+;Y0+;Y1+;Y1+;	y5+;Y0+;Y1+;	No
MS2.37568.37568.4.2.dta	5124.27	3413.63	4	SLGNVJFTVSAEALESQELCGTEVPSVPEHGR	20,Carbamidomethyl[C];	1710.6	5-3-1-0-0	6,	0	0	6	0.4237	0.24221	3.8331	0.9284	b2+;y2+;y3+;y5+;y8+;y9+;	y3+;y5+;y8+;	No
MS2.37568.37568.4.3.dta	5125.26	3413.63	4	SLGNVJFTVSAEALESQELCGTEVPSVPEHGR	20,Carbamidomethyl[C];	1711.62	5-3-0-0-2	6,	0	0	6	0.4237	0.24221	3.8331	0.9284	b2+;y2+;y3+;y5+;y8+;y9+;	y3+;y5+;y8+;	No
MS2.5912.5912.3.1.dta	3345.36	1284.62	3	YKJNSDISSTR	-	2060.76	5-4-0-0-3	3,	3	0.1618	4	0.13417	0.23047	4.01971	0.92644	y1+;y4+;y5+;y7+;Y0+;Y0+;Y1+;	y5+;y7+;Y1+;	No
MS2.5912.5912.3.0.dta	3344.36	1284.62	3	YKJNSDISSTR	-	2059.73	5-4-1-0-1	3,	3	0.1618	4	0.13417	0.23047	4.01971	0.92644	y1+;y4+;y5+;y7+;Y0+;Y0+;Y1+;	y5+;y7+;Y1+;	Yes	3	1	1
MS2.29811.29811.4.0.dta	4751.96	1744.89	4	YFTPJKTEDTIFLR	-	3007.06	6-5-3-0-1	5,	8	0.12066	8	0.08598	0.23914	3.85241	0.92128	b2+;y3+;y5+;y6+;y7+;y8+;y9+;y11+;Y0+;Y1+;Y0++;Y1++;Y1++;Y2++;Y3++;Y4++;	y5+;Y1+;Y1++;	Yes	1	1	1
MS2.29811.29811.4.2.dta	4752.97	1744.89	4	YFTPJKTEDTIFLR	-	3008.08	6-5-2-0-3	5,	8	0.12066	8	0.08598	0.23914	3.85241	0.92128	b2+;y3+;y5+;y6+;y7+;y8+;y9+;y11+;Y0+;Y1+;Y0++;Y1++;Y1++;Y2++;Y3++;Y4++;	y5+;Y1+;Y1++;	No
MS2.23847.23847.3.0.dta	3962.67	2381.1	3	STGKPTLYJVSLVMSDTAGTCY	14,Oxidation[M];21,Carbamidomethyl[C];	1581.56	6-3-0-0-0	9,	0	0	14	0.23163	0.20325	4.52881	0.92049	b4+;b5+;b7+;b8+;b9+;b10+;b11+;b12+;b13+;y1+;y2+;y3+;y4+;y5+;	b7+;b8+;b10+;y2+;	No
MS2.31236.31236.3.0.dta	3999.81	1795.01	3	VVLHPJYSQVDIGLIK	-	2204.77	5-4-2-0-0	6,	8	0.03389	17	0.17176	0.30093	3.04454	0.91618	b2+;b3+;b4+;b6+;b7+;b9+;b10+;b11+;b12+;y1+;y2+;y3+;y6+;y7+;y9+;y10+;y12+;Y0+;Y0+;Y1+;Y1+;Y0++;Y1++;Y4++;Y5++;	b4+;y2+;	Yes	1	1	1
MS2.31935.31935.4.1.dta	5055.21	1795.01	4	VVLHPJYSQVDIGLIK	-	3260.16	9-6-1-0-2	6,	9	0.07308	7	0.10986	0.20092	4.55026	0.91423	b4+;b12+;y2+;y3+;y4+;y5+;y6+;Y0+;Y1+;Y0++;Y0++;Y1++;Y1++;Y2++;Y3++;Y4++;	b4+;y4+;y5+;Y1++;	Yes	1	1	1
MS2.38404.38404.4.0.dta	4758.18	3541.72	4	SLGNVJFTVSAEALESQELCGTEVPSVPEHGRK	20,Carbamidomethyl[C];	1216.42	5-2-0-0-0	6,	0	0	6	0.40346	0.23767	3.83944	0.91253	b2+;b5+;y4+;y6+;y9+;y14+;	y6+;y9+;y14+;	No
MS2.35605.35605.4.0.dta	4962.22	3413.63	4	SLGNVJFTVSAEALESQELCGTEVPSVPEHGR	20,Carbamidomethyl[C];	1548.54	4-3-1-0-0	6,	0	0	6	0.40926	0.2372	3.8331	0.90922	b2+;y3+;y5+;y7+;y8+;y9+;	y3+;y5+;y8+;	No
MS2.30476.30476.4.1.dta	4650.11	2695.39	4	MVSHHJLTTGATLINEQWLLTTAK	1,Oxidation[M];	1954.7	4-5-1-0-0	6,	0	0	13	0.18436	0.1989	4.56511	0.90799	y1+;y2+;y3+;y6+;y7+;y8+;y9+;y10+;y11+;y12+;y13+;y15+;y16+;	y2+;y3+;y6+;y10+;	No
MS2.6147.6147.3.0.dta	3010.21	1096.52	3	MVSHHJLTTG	-	1913.68	5-4-1-0-0	6,	3	0.27022	4	0.09702	0.22449	4.0398	0.90689	b4+;b5+;b6+;b7+;Y0+;Y1+;Y1+;	b5+;Y0+;Y1+;	Yes	3	1	1
MS2.6147.6147.3.1.dta	3011.21	1096.52	3	MVSHHJLTTG	-	1914.7	5-4-0-0-2	6,	3	0.27022	4	0.09702	0.22449	4.0398	0.90689	b4+;b5+;b6+;b7+;Y0+;Y1+;Y1+;	b5+;Y0+;Y1+;	No
MS2.26673.26673.2.2.dta	2854.21	1920.85	2	QQJASSMCVPDQDTAIR	8,Carbamidomethyl[C];	933.344	2-3-0-0-0	3,	0	0	5	0.29158	0.19969	4.53585	0.90577	y1+;y4+;y5+;y6+;y8+;	y1+;y4+;y6+;y8+;	No
MS2.8006.8006.2.0.dta	3087.2	1189.51	2	EEQYJSTYR	-	1897.68	4-4-1-0-1	5,	5	0.24159	2	0.03358	0.18845	4.79306	0.90324	b3+;y1+;Y0+;Y0+;Y1+;Y1+;Y2+;	b3+;Y0+;Y0+;Y1+;	No
MS2.8006.8006.2.1.dta	3088.21	1189.51	2	EEQYJSTYR	-	1898.7	4-4-0-0-3	5,	5	0.24159	2	0.03358	0.18845	4.79306	0.90324	b3+;y1+;Y0+;Y0+;Y1+;Y1+;Y2+;	b3+;Y0+;Y0+;Y1+;	No
MS2.33993.33993.4.2.dta	4675.1	1780.02	4	LVPVPITJATLDQITGK	-	2895.03	8-5-1-0-2	8,	4	0.0571	16	0.14094	0.28781	3.1303	0.90093	b2+;b3+;b4+;b10+;b12+;b14+;y3+;y5+;y6+;y7+;y8+;y9+;y10+;y11+;y13+;y15+;Y0+;Y0+;Y1+;Y1+;	y3+;Y1+;	No
MS2.6209.6209.3.1.dta	2980.23	1284.62	3	YKJNSDISSTR	-	1695.62	4-3-0-0-3	3,	6	0.29667	2	0.08803	0.23201	3.87262	0.89848	y5+;y7+;Y0+;Y0+;Y1+;Y1+;Y0++;Y1++;	y5+;Y1+;Y1++;	No
MS2.6209.6209.3.0.dta	2979.23	1284.62	3	YKJNSDISSTR	-	1694.6	4-3-1-0-1	3,	6	0.29667	2	0.08803	0.23201	3.87262	0.89848	y5+;y7+;Y0+;Y0+;Y1+;Y1+;Y0++;Y1++;	y5+;Y1+;Y1++;	Yes	3	1	1
MS2.22769.22769.3.0.dta	4415.82	2339.08	3	GLTFQQJASSMCVPDQDTAIR	12,Carbamidomethyl[C];	2076.75	6-4-0-0-2	7,	0	0	4	0.32495	0.23347	3.83944	0.8964	y4+;y6+;y8+;y12+;	y4+;y6+;y8+;	No
MS2.38339.38339.5.1.dta	5327.3	3413.63	5	SLGNVJFTVSAEALESQELCGTEVPSVPEHGR	20,Carbamidomethyl[C];	1913.68	5-4-1-0-0	6,	0	0	4	0.36533	0.19761	4.53585	0.89633	y3+;y5+;y8+;y12+;	y3+;y5+;y8+;y12+;	No
MS2.38339.38339.5.2.dta	5328.34	3413.63	5	SLGNVJFTVSAEALESQELCGTEVPSVPEHGR	20,Carbamidomethyl[C];	1914.7	5-4-0-0-2	6,	0	0	4	0.36533	0.19761	4.53585	0.89633	y3+;y5+;y8+;y12+;	y3+;y5+;y8+;y12+;	No
MS2.32025.32025.4.2.dta	4942.22	2679.39	4	MVSHHJLTTGATLINEQWLLTTAK	-	2262.81	5-5-1-0-1	6,	0	0	10	0.21359	0.19553	4.56511	0.89262	y1+;y2+;y3+;y4+;y5+;y6+;y7+;y9+;y10+;y11+;	y3+;y4+;y5+;y6+;	No
MS2.27652.27652.4.0.dta	4618.91	2339.08	4	GLTFQQJASSMCVPDQDTAIR	12,Carbamidomethyl[C];	2279.83	6-5-0-0-2	7,	0	0	6	0.29353	0.23223	3.83944	0.89165	b3+;y1+;y4+;y6+;y8+;y12+;	y4+;y6+;y8+;	No
MS2.19211.19211.4.1.dta	4455.85	2339.08	4	GLTFQQJASSMCVPDQDTAIR	12,Carbamidomethyl[C];	2116.76	5-5-1-0-0	7,	0	0	14	0.19606	0.23222	3.83944	0.8916	b3+;b5+;b7+;b8+;b9+;y1+;y2+;y3+;y4+;y5+;y6+;y7+;y9+;y10+;	y1+;y4+;y6+;	No
MS2.38079.38079.4.2.dta	5303.34	3413.63	4	SLGNVJFTVSAEALESQELCGTEVPSVPEHGR	20,Carbamidomethyl[C];	1889.67	7-3-0-0-1	6,	0	0	4	0.47182	0.23232	3.8331	0.8905	b2+;y3+;y5+;y8+;	y3+;y5+;y8+;	No
MS2.3079.3079.2.0.dta	3001.13	796.347	2	NEEYJK	-	2204.77	5-4-2-0-0	5,	1	0.20565	2	0.16175	0.21447	4.13193	0.88619	b2+;b3+;Y0+;	b2+;b3+;Y0+;	No
MS2.3079.3079.2.1.dta	3002.13	796.347	2	NEEYJK	-	2205.79	5-4-1-0-2	5,	1	0.20565	2	0.16175	0.21447	4.13193	0.88619	b2+;b3+;Y0+;	b2+;b3+;Y0+;	No
MS2.5121.5121.3.1.dta	3637.47	1284.62	3	YKJNSDISSTR	-	2352.85	7-6-0-0-0	3,	6	0.10736	9	0.09693	0.27754	3.19058	0.88552	b6+;b7+;y3+;y4+;y5+;y6+;y7+;y8+;y9+;Y0+;Y0+;Y1+;Y1+;Y2+;Y3+;	y5+;Y1+;	No
MS2.5121.5121.3.0.dta	3635.47	1284.62	3	YKJNSDISSTR	-	2350.83	5-4-2-0-1	3,	6	0.10736	9	0.09693	0.27754	3.19058	0.88552	b6+;b7+;y3+;y4+;y5+;y6+;y7+;y8+;y9+;Y0+;Y0+;Y1+;Y1+;Y2+;Y3+;	y5+;Y1+;	Yes	1	1	1
MS2.36300.36300.5.0.dta	5165.23	3413.63	5	SLGNVJFTVSAEALESQELCGTEVPSVPEHGR	20,Carbamidomethyl[C];	1751.62	4-4-1-0-0	6,	0	0	5	0.43513	0.2308	3.8331	0.88468	b2+;b3+;y3+;y5+;y8+;	y3+;y5+;y8+;	No
MS2.9938.9938.2.0.dta	2974.17	769.388	2	YFTPJK	-	2204.77	5-4-2-0-0	5,	2	0.24872	1	0.08294	0.21362	4.13193	0.88265	y3+;Y0+;Y1+;	y3+;Y0+;Y1+;	No
MS2.8632.8632.3.0.dta	3065.24	769.388	3	YFTPJK	-	2295.82	7-5-0-0-1	5,	2	0.27148	1	0.06564	0.21322	4.13193	0.88101	y3+;Y0+;Y1+;	y3+;Y0+;Y1+;	No
MS2.28204.28204.3.0.dta	4679.94	1744.89	3	YFTPJKTEDTIFLR	-	2935.04	7-6-2-0-0	5,	3	0.08274	7	0.18425	0.22861	3.85241	0.8807	b2+;y1+;y3+;y5+;y6+;y7+;y8+;Y1+;Y0++;Y1++;	y5+;y8+;Y1+;	Yes	1	1	1
MS2.27838.27838.4.0.dta	4602.89	2339.08	4	GLTFQQJASSMCVPDQDTAIR	12,Carbamidomethyl[C];	2263.83	5-5-0-0-3	7,	0	0	7	0.24441	0.2293	3.83944	0.88039	b8+;y1+;y4+;y6+;y8+;y9+;y10+;	y4+;y6+;y8+;	No
MS2.24473.24473.3.0.dta	3216.41	1593.83	3	SIJTTNVMGTSLTVR	-	1622.58	5-4-0-0-0	3,	2	0.2609	4	0.14046	0.22291	3.94791	0.88002	y1+;y7+;y8+;y10+;Y0+;Y1+;	y7+;y8+;Y1+;	Yes	3	1	1
MS2.26116.26116.4.1.dta	3508.52	1593.83	4	SIJTTNVMGTSLTVR	-	1914.7	5-4-0-0-2	3,	2	0.17598	5	0.16996	0.22259	3.94791	0.87877	y6+;y7+;y8+;y10+;y11+;Y0+;Y1+;	y7+;y8+;Y1+;	No
MS2.29813.29813.4.0.dta	4768.99	1744.89	4	YFTPJKTEDTIFLR	-	3024.07	7-5-2-0-2	5,	10	0.13683	8	0.06576	0.22794	3.85241	0.87812	b2+;b3+;y3+;y4+;y6+;y7+;y8+;y9+;Y0+;Y0+;Y1+;Y1+;Y0++;Y1++;Y1++;Y2++;Y3++;Y4++;	b2+;Y1+;Y1++;	Yes	1	1	1
MS2.36604.36604.4.1.dta	4995.19	3413.63	4	SLGNVJFTVSAEALESQELCGTEVPSVPEHGR	20,Carbamidomethyl[C];	1581.56	6-3-0-0-0	6,	0	0	3	0.48631	0.22901	3.8331	0.8778	y3+;y5+;y8+;	y3+;y5+;y8+;	No
MS2.10142.10142.3.0.dta	4078.65	1920.85	3	QQJASSMCVPDQDTAIR	8,Carbamidomethyl[C];	2157.78	4-6-1-0-0	3,	0	0	3	0.40951	0.22817	3.8331	0.87461	y4+;y6+;y8+;	y4+;y6+;y8+;	No
MS2.8020.8020.3.0.dta	3249.27	1189.51	3	EEQYJSTYR	-	2059.73	5-4-1-0-1	5,	6	0.3047	2	0.02134	0.21531	4.06094	0.87434	y1+;y4+;Y0+;Y0+;Y1+;Y1+;Y3+;Y4+;	Y0+;Y1+;Y4+;	Yes	3	1	1
MS2.4805.4805.3.0.dta	3506.41	1284.62	3	YKJNSDISSTR	-	2221.79	6-4-1-0-1	3,	2	0.107	4	0.16824	0.21714	4.01971	0.87283	y1+;y4+;y5+;y7+;Y0+;Y1+;	y4+;y5+;Y1+;	Yes	3	0	1
MS2.4805.4805.3.1.dta	3507.43	1284.62	3	YKJNSDISSTR	-	2222.81	6-4-0-0-3	3,	2	0.107	4	0.16824	0.21714	4.01971	0.87283	y1+;y4+;y5+;y7+;Y0+;Y1+;	y4+;y5+;Y1+;	No
MS2.29352.29352.3.0.dta	4438.98	1795.01	3	VVLHPJYSQVDIGLIK	-	2643.94	7-6-1-0-0	6,	3	0.07784	5	0.14925	0.19171	4.55026	0.87235	b4+;y1+;y4+;y5+;y12+;Y0+;Y1+;Y1++;	b4+;y5+;Y1+;Y1++;	Yes	3	1	1
MS2.30441.30441.3.0.dta	4446.91	2184.08	3	LAGKPTHVJVSVVMAEVDGTC	21,Carbamidomethyl[C];	2262.81	5-5-1-0-1	9,	0	0	11	0.26017	0.22808	3.82069	0.87141	b7+;b8+;b10+;b11+;b13+;y1+;y2+;y4+;y5+;y6+;y8+;	b8+;y1+;y2+;	Yes	2	1	1
MS2.29962.29962.3.3.dta	4974.05	1744.89	3	YFTPJKTEDTIFLR	-	3229.17	9-8-0-0-1	5,	2	0.09746	4	0.16378	0.19005	4.55763	0.8662	b2+;y5+;y6+;y8+;Y1+;Y1++;	y5+;y8+;Y1+;Y1++;	No
MS2.29962.29962.3.1.dta	4972.04	1744.89	3	YFTPJKTEDTIFLR	-	3227.15	7-6-2-0-2	5,	2	0.09746	4	0.16378	0.19005	4.55763	0.8662	b2+;y5+;y6+;y8+;Y1+;Y1++;	y5+;y8+;Y1+;Y1++;	No
MS2.29962.29962.3.2.dta	4973.04	1744.89	3	YFTPJKTEDTIFLR	-	3228.17	7-6-1-0-4	5,	2	0.09746	4	0.16378	0.19005	4.55763	0.8662	b2+;y5+;y6+;y8+;Y1+;Y1++;	y5+;y8+;Y1+;Y1++;	No
MS2.29962.29962.3.0.dta	4971.03	1744.89	3	YFTPJKTEDTIFLR	-	3226.13	7-6-3-0-0	5,	2	0.09746	4	0.16378	0.19005	4.55763	0.8662	b2+;y5+;y6+;y8+;Y1+;Y1++;	y5+;y8+;Y1+;Y1++;	No
MS2.28567.28567.3.1.dta	4316.81	1744.89	3	YFTPJKTEDTIFLR	-	2571.95	6-5-0-0-4	5,	8	0.10331	11	0.15538	0.28358	3.05003	0.86492	b2+;b3+;y1+;y2+;y3+;y4+;y6+;y7+;y8+;y9+;y11+;Y0+;Y0+;Y1+;Y1+;Y0++;Y0++;Y1++;Y1++;	b2+;Y1+;	Yes	1	1	1
MS2.28567.28567.3.0.dta	4314.81	1744.89	3	YFTPJKTEDTIFLR	-	2569.9	6-5-2-0-0	5,	8	0.10331	11	0.15538	0.28358	3.05003	0.86492	b2+;b3+;y1+;y2+;y3+;y4+;y6+;y7+;y8+;y9+;y11+;Y0+;Y0+;Y1+;Y1+;Y0++;Y0++;Y1++;Y1++;	b2+;Y1+;	Yes	1	1	1
MS2.3608.3608.3.1.dta	2727.06	796.347	3	NEEYJK	-	1930.69	6-4-0-0-1	5,	4	0.06001	5	0.06752	0.20927	4.13193	0.86468	b2+;b3+;b4+;y2+;y3+;Y0+;Y0+;Y1+;Y1+;	b3+;Y0+;Y1+;	Yes	1	1	1
MS2.30661.30661.5.0.dta	4650.11	2695.39	5	MVSHHJLTTGATLINEQWLLTTAK	1,Oxidation[M];	1954.7	4-5-1-0-0	6,	0	0	7	0.30834	0.18892	4.56511	0.86242	y2+;y3+;y4+;y5+;y6+;y7+;y10+;	y4+;y5+;y6+;y10+;	No
MS2.13111.13111.3.0.dta	3121.28	1555.71	3	THTJISESHPJATF	-	1565.56	5-3-0-0-1	4,	1	0.03296	4	0.23878	0.19003	4.53585	0.86196	b2+;b9+;y5+;y9+;Y1+;	b2+;b9+;y9+;Y1+;	No
MS2.36213.36213.4.4.dta	5165.28	3413.63	4	SLGNVJFTVSAEALESQELCGTEVPSVPEHGR	20,Carbamidomethyl[C];	1751.62	4-4-1-0-0	6,	0	0	4	0.44545	0.22474	3.8331	0.86146	y2+;y3+;y5+;y8+;	y3+;y5+;y8+;	No
MS2.38566.38566.4.1.dta	5344.34	3413.63	4	SLGNVJFTVSAEALESQELCGTEVPSVPEHGR	20,Carbamidomethyl[C];	1930.69	6-4-0-0-1	6,	0	0	4	0.40998	0.22467	3.8331	0.86119	y5+;y8+;y9+;y12+;	y5+;y8+;y9+;	No
MS2.31400.31400.5.0.dta	4651.1	2679.39	5	MVSHHJLTTGATLINEQWLLTTAK	-	1971.72	5-5-0-0-1	6,	0	0	6	0.23843	0.16463	5.20854	0.85748	y2+;y3+;y4+;y5+;y6+;y7+;	y3+;y4+;y5+;y6+;y7+;	No
MS2.7048.7048.2.0.dta	2430.97	1189.51	2	EEQYJSTYR	-	1241.45	3-3-0-0-1	5,	3	0.33415	1	0.02489	0.1786	4.79306	0.85605	y1+;Y0+;Y1+;Y1+;	y1+;Y0+;Y1+;Y1+;	Yes	3	1	1
MS2.38475.38475.4.1.dta	5303.32	3413.63	4	SLGNVJFTVSAEALESQELCGTEVPSVPEHGR	20,Carbamidomethyl[C];	1889.67	7-3-0-0-1	6,	0	0	3	0.45211	0.2232	3.8331	0.85556	y5+;y8+;y13+;	y5+;y8+;y13+;	No
MS2.32920.32920.3.1.dta	4461.88	1891.96	3	FYFTPJKTEDTIFLR	-	2569.9	6-5-2-0-0	6,	3	0.02867	8	0.18781	0.22165	3.85904	0.85536	b2+;y1+;y2+;y5+;y6+;y7+;y8+;y11+;Y0++;Y0++;Y1++;	b2+;y5+;y8+;	Yes	3	1	1
MS2.32920.32920.3.2.dta	4462.9	1891.96	3	FYFTPJKTEDTIFLR	-	2570.93	6-5-1-0-2	6,	3	0.02867	8	0.18781	0.22165	3.85904	0.85536	b2+;y1+;y2+;y5+;y6+;y7+;y8+;y11+;Y0++;Y0++;Y1++;	b2+;y5+;y8+;	No
MS2.31575.31575.3.1.dta	4535.94	2184.08	3	LAGKPTHVJVSVVMAEVDGTC	21,Carbamidomethyl[C];	2351.85	5-4-1-0-3	9,	0	0	15	0.18892	0.22293	3.82069	0.85173	b7+;b8+;b9+;b10+;b11+;b12+;b13+;b14+;y1+;y2+;y4+;y5+;y6+;y7+;y9+;	b8+;y1+;y2+;	No
MS2.31575.31575.3.0.dta	4534.93	2184.08	3	LAGKPTHVJVSVVMAEVDGTC	21,Carbamidomethyl[C];	2350.83	5-4-2-0-1	9,	0	0	15	0.18892	0.22293	3.82069	0.85173	b7+;b8+;b9+;b10+;b11+;b12+;b13+;b14+;y1+;y2+;y4+;y5+;y6+;y7+;y9+;	b8+;y1+;y2+;	Yes	2	1	1
MS2.35580.35580.4.0.dta	4918.27	2963.6	4	LSLHRPALEDLLLGSEAJLTCTLTGLR	21,Carbamidomethyl[C];	1954.7	4-5-1-0-0	18,	3	0.04061	11	0.18062	0.22057	3.85241	0.84972	b2+;b4+;b5+;b9+;b10+;y1+;y2+;y3+;y4+;y7+;y8+;Y1++;Y1++;Y2++;	b5+;b10+;y1+;	No
MS2.26649.26649.3.1.dta	3659.58	1744.89	3	YFTPJKTEDTIFLR	-	1914.7	5-4-0-0-2	5,	1	0.04919	7	0.21388	0.21927	3.85241	0.84473	b2+;y1+;y3+;y5+;y6+;y7+;y8+;Y1+;	y5+;y8+;Y1+;	No
MS2.26649.26649.3.0.dta	3658.57	1744.89	3	YFTPJKTEDTIFLR	-	1913.68	5-4-1-0-0	5,	1	0.04919	7	0.21388	0.21927	3.85241	0.84473	b2+;y1+;y3+;y5+;y6+;y7+;y8+;Y1+;	y5+;y8+;Y1+;	Yes	1	1	1
MS2.38373.38373.3.0.dta	4630.06	3413.63	3	SLGNVJFTVSAEALESQELCGTEVPSVPEHGR	20,Carbamidomethyl[C];	1216.42	5-2-0-0-0	6,	0	0	3	0.43136	0.22017	3.8331	0.84395	y5+;y8+;y9+;	y5+;y8+;y9+;	No
MS2.31537.31537.4.0.dta	4534.94	2184.08	4	LAGKPTHVJVSVVMAEVDGTC	21,Carbamidomethyl[C];	2350.83	5-4-2-0-1	9,	4	0.01336	20	0.17057	0.27839	3.02335	0.84168	b7+;b8+;b9+;b10+;b11+;b12+;b13+;b14+;b15+;b16+;b18+;y1+;y2+;y3+;y4+;y5+;y6+;y7+;y8+;y9+;Y0++;Y0++;Y1++;Y1++;	y1+;y2+;	Yes	3	1	1
MS2.31537.31537.4.2.dta	4535.94	2184.08	4	LAGKPTHVJVSVVMAEVDGTC	21,Carbamidomethyl[C];	2351.85	5-4-1-0-3	9,	4	0.01336	20	0.17057	0.27839	3.02335	0.84168	b7+;b8+;b9+;b10+;b11+;b12+;b13+;b14+;b15+;b16+;b18+;y1+;y2+;y3+;y4+;y5+;y6+;y7+;y8+;y9+;Y0++;Y0++;Y1++;Y1++;	y1+;y2+;	No
MS2.9840.9840.3.1.dta	4159.62	769.388	3	YFTPJK	-	3390.23	8-6-1-0-4	5,	2	0.24825	1	0.06372	0.20367	4.13193	0.84154	y3+;Y0+;Y1+;	y3+;Y0+;Y1+;	No
MS2.9840.9840.3.0.dta	4158.62	769.388	3	YFTPJK	-	3389.21	8-6-2-0-2	5,	2	0.24825	1	0.06372	0.20367	4.13193	0.84154	y3+;Y0+;Y1+;	y3+;Y0+;Y1+;	No
MS2.9840.9840.3.2.dta	4160.62	769.388	3	YFTPJK	-	3391.22	10-8-0-0-1	5,	2	0.24825	1	0.06372	0.20367	4.13193	0.84154	y3+;Y0+;Y1+;	y3+;Y0+;Y1+;	No
MS2.10540.10540.3.1.dta	3630.4	769.388	3	YFTPJK	-	2861	6-5-3-0-0	5,	2	0.23711	1	0.06872	0.20268	4.13193	0.83746	y3+;Y0+;Y1+;	y3+;Y0+;Y1+;	No
MS2.10540.10540.3.2.dta	3631.4	769.388	3	YFTPJK	-	2862.02	6-5-2-0-2	5,	2	0.23711	1	0.06872	0.20268	4.13193	0.83746	y3+;Y0+;Y1+;	y3+;Y0+;Y1+;	Yes	3	1	1
MS2.21500.21500.3.0.dta	3463.39	1183.54	3	GLTFQQJASSM	-	2279.83	6-5-0-0-2	7,	4	0.03139	12	0.13162	0.26112	3.19058	0.83311	b3+;b5+;b6+;b7+;b8+;b9+;b10+;y3+;y5+;y6+;y7+;y9+;Y0+;Y0+;Y1+;Y1+;	b8+;Y0+;	No
MS2.4213.4213.3.0.dta	3783.46	776.39	3	EJGTISR	-	3007.06	6-5-3-0-1	2,	7	0.21806	1	0.01595	0.20267	4.10684	0.83233	y1+;Y0+;Y1+;Y1+;Y2+;Y3+;Y4+;Y5+;	Y1+;Y2+;Y4+;	No
MS2.17613.17613.3.0.dta	3980.6	1920.85	3	QQJASSMCVPDQDTAIR	8,Carbamidomethyl[C];	2059.73	5-4-1-0-1	3,	0	0	4	0.3544	0.21624	3.8331	0.82887	y1+;y4+;y6+;y8+;	y4+;y6+;y8+;	No
MS2.37440.37440.3.0.dta	4630.06	3413.63	3	SLGNVJFTVSAEALESQELCGTEVPSVPEHGR	20,Carbamidomethyl[C];	1216.42	5-2-0-0-0	6,	0	0	3	0.44869	0.21544	3.8331	0.82581	y3+;y5+;y8+;	y3+;y5+;y8+;	No
MS2.34932.34932.4.0.dta	4630.06	3413.63	4	SLGNVJFTVSAEALESQELCGTEVPSVPEHGR	20,Carbamidomethyl[C];	1216.42	5-2-0-0-0	6,	0	0	15	0.31318	0.27203	3.03379	0.82528	b2+;b3+;b4+;b5+;y1+;y3+;y5+;y6+;y7+;y8+;y9+;y10+;y12+;y13+;y14+;	y5+;y8+;	Yes	1	1	1
MS2.27739.27739.3.0.dta	4415.81	2339.08	3	GLTFQQJASSMCVPDQDTAIR	12,Carbamidomethyl[C];	2076.75	6-4-0-0-2	7,	0	0	4	0.28786	0.2143	3.83944	0.8228	y1+;y4+;y6+;y8+;	y4+;y6+;y8+;	No
MS2.5418.5418.3.0.dta	3692.48	1284.62	3	YKJNSDISSTR	-	2407.85	5-5-2-0-0	3,	4	0.17887	5	0.12241	0.25764	3.19058	0.82201	b7+;y1+;y5+;y7+;y9+;Y0+;Y0+;Y1+;Y2+;	y5+;Y1+;	Yes	3	1	1
MS2.36307.36307.4.0.dta	4920.19	3541.72	4	SLGNVJFTVSAEALESQELCGTEVPSVPEHGRK	20,Carbamidomethyl[C];	1378.48	6-2-0-0-0	6,	0	0	4	0.41469	0.21398	3.83944	0.82157	b4+;y4+;y6+;y9+;	y4+;y6+;y9+;	No
MS2.6208.6208.3.0.dta	3547.44	1284.62	3	YKJNSDISSTR	-	2262.81	5-5-1-0-1	3,	2	0.15937	3	0.13019	0.20339	4.01971	0.81757	y4+;y5+;y8+;Y0+;Y1+;	y5+;Y0+;Y1+;	Yes	3	1	1
MS2.12819.12819.3.1.dta	3368.45	958.557	3	TPLTAJITK	-	2409.89	5-5-0-0-4	6,	2	0.3471	1	0.04003	0.20106	4.06094	0.8165	b7+;Y0+;Y1+;	b7+;Y0+;Y1+;	No
MS2.12819.12819.3.0.dta	3367.45	958.557	3	TPLTAJITK	-	2408.87	5-5-1-0-2	6,	2	0.3471	1	0.04003	0.20106	4.06094	0.8165	b7+;Y0+;Y1+;	b7+;Y0+;Y1+;	No
MS2.10066.10066.3.0.dta	3356.29	769.388	3	YFTPJK	-	2586.92	7-5-1-0-1	5,	2	0.26361	1	0.04326	0.1976	4.13193	0.81646	y3+;Y0+;Y1+;	y3+;Y0+;Y1+;	No
MS2.10066.10066.3.1.dta	3356.34	769.388	3	YFTPJK	-	2586.92	7-5-1-0-1	5,	2	0.26361	1	0.04326	0.1976	4.13193	0.81646	y3+;Y0+;Y1+;	y3+;Y0+;Y1+;	No
MS2.10066.10066.3.2.dta	3357.33	769.388	3	YFTPJK	-	2587.94	7-5-0-0-3	5,	2	0.26361	1	0.04326	0.1976	4.13193	0.81646	y3+;Y0+;Y1+;	y3+;Y0+;Y1+;	No
MS2.9732.9732.3.0.dta	3485.36	769.388	3	YFTPJK	-	2715.96	6-5-2-0-1	5,	2	0.25288	1	0.04881	0.19729	4.13193	0.81521	y3+;Y0+;Y1+;	y3+;Y0+;Y1+;	No
MS2.9732.9732.3.1.dta	3486.36	769.388	3	YFTPJK	-	2716.98	6-5-1-0-3	5,	2	0.25288	1	0.04881	0.19729	4.13193	0.81521	y3+;Y0+;Y1+;	y3+;Y0+;Y1+;	No
MS2.9732.9732.3.2.dta	3487.36	769.388	3	YFTPJK	-	2717.98	8-7-0-0-0	5,	2	0.25288	1	0.04881	0.19729	4.13193	0.81521	y3+;Y0+;Y1+;	y3+;Y0+;Y1+;	No
MS2.4214.4214.3.0.dta	2965.19	993.46	3	JNSDISSTR	-	1971.72	5-5-0-0-1	1,	6	0.09169	7	0.08514	0.25249	3.22517	0.81433	y1+;y2+;y3+;y4+;y5+;y7+;y8+;Y0+;Y0+;Y1+;Y1+;Y2+;Y3+;	y5+;Y1+;	Yes	1	1	1
MS2.12595.12595.2.3.dta	2764.12	1157.52	2	EEQFJSTFR	-	1606.59	4-4-0-0-1	5,	4	0.25163	1	0.03523	0.16986	4.79306	0.81416	y1+;Y0+;Y1+;Y2+;Y3+;	y1+;Y1+;Y2+;Y3+;	No
MS2.37890.37890.4.0.dta	4758.18	3541.72	4	SLGNVJFTVSAEALESQELCGTEVPSVPEHGRK	20,Carbamidomethyl[C];	1216.42	5-2-0-0-0	6,	0	0	8	0.33416	0.2114	3.83944	0.81165	b2+;b3+;b4+;b5+;y3+;y4+;y6+;y10+;	b5+;y6+;y10+;	No
MS2.4769.4769.2.0.dta	3303.35	1284.62	2	YKJNSDISSTR	-	2018.71	6-3-1-0-1	3,	1	0.14399	2	0.19092	0.20125	4.01971	0.80896	y5+;y7+;Y1+;	y5+;y7+;Y1+;	Yes	3	0	1
MS2.23775.23775.4.0.dta	4743.85	1920.85	4	QQJASSMCVPDQDTAIR	8,Carbamidomethyl[C];	2823.01	9-6-0-0-1	3,	0	0	9	0.22675	0.21077	3.8331	0.80792	b14+;y1+;y2+;y3+;y4+;y5+;y8+;y9+;y10+;	y1+;y4+;y8+;	No
MS2.4164.4164.3.1.dta	4004.54	776.39	3	EJGTISR	-	3228.17	7-6-1-0-4	2,	6	0.25192	1	0.00745	0.19632	4.10684	0.80626	y1+;Y0+;Y0+;Y1+;Y2+;Y3+;Y4+;	Y1+;Y2+;Y3+;	Yes	3	1	1
MS2.4164.4164.3.0.dta	4002.53	776.39	3	EJGTISR	-	3226.13	7-6-3-0-0	2,	6	0.25192	1	0.00745	0.19632	4.10684	0.80626	y1+;Y0+;Y0+;Y1+;Y2+;Y3+;Y4+;	Y1+;Y2+;Y3+;	Yes	3	1	1
MS2.30180.30180.4.5.dta	4607.91	1744.89	4	YFTPJKTEDTIFLR	-	2863.04	6-5-1-0-4	5,	7	0.14199	5	0.08176	0.20913	3.85241	0.80566	b2+;y3+;y5+;y8+;y11+;Y0+;Y1+;Y0++;Y0++;Y1++;Y1++;Y2++;	y5+;Y1+;Y1++;	Yes	1	1	1
MS2.30180.30180.4.1.dta	4606.91	1744.89	4	YFTPJKTEDTIFLR	-	2862.02	6-5-2-0-2	5,	7	0.14199	5	0.08176	0.20913	3.85241	0.80566	b2+;y3+;y5+;y8+;y11+;Y0+;Y1+;Y0++;Y0++;Y1++;Y1++;Y2++;	y5+;Y1+;Y1++;	No
MS2.30180.30180.4.0.dta	4605.91	1744.89	4	YFTPJKTEDTIFLR	-	2861	6-5-3-0-0	5,	7	0.14199	5	0.08176	0.20913	3.85241	0.80566	b2+;y3+;y5+;y8+;y11+;Y0+;Y1+;Y0++;Y0++;Y1++;Y1++;Y2++;	y5+;Y1+;Y1++;	Yes	1	1	1
MS2.5491.5491.3.0.dta	3401.39	1284.62	3	YKJNSDISSTR	-	2116.76	5-5-1-0-0	3,	3	0.04	8	0.16514	0.25246	3.19058	0.80551	y1+;y3+;y4+;y5+;y6+;y7+;y8+;y9+;Y0+;Y0+;Y1+;	y5+;y7+;	Yes	1	1	1
MS2.5491.5491.3.1.dta	3402.38	1284.62	3	YKJNSDISSTR	-	2117.78	5-5-0-0-2	3,	3	0.04	8	0.16514	0.25246	3.19058	0.80551	y1+;y3+;y4+;y5+;y6+;y7+;y8+;y9+;Y0+;Y0+;Y1+;	y5+;y7+;	No
MS2.37007.37007.4.1.dta	4962.2	3413.63	4	SLGNVJFTVSAEALESQELCGTEVPSVPEHGR	20,Carbamidomethyl[C];	1548.54	4-3-1-0-0	6,	0	0	4	0.40606	0.21013	3.8331	0.80545	b4+;y3+;y5+;y8+;	y3+;y5+;y8+;	No
MS2.7982.7982.3.1.dta	3088.21	1189.51	3	EEQYJSTYR	-	1898.7	4-4-0-0-3	5,	7	0.24582	5	0.04565	0.24936	3.22517	0.80424	b3+;b4+;y1+;y2+;y4+;Y0+;Y0+;Y1+;Y1+;Y2+;Y3+;Y4+;	Y0+;Y1+;	No
MS2.7982.7982.3.0.dta	3087.21	1189.51	3	EEQYJSTYR	-	1897.68	4-4-1-0-1	5,	7	0.24582	5	0.04565	0.24936	3.22517	0.80424	b3+;b4+;y1+;y2+;y4+;Y0+;Y0+;Y1+;Y1+;Y2+;Y3+;Y4+;	Y0+;Y1+;	Yes	1	1	1
MS2.32025.32025.4.0.dta	4941.21	2695.39	4	MVSHHJLTTGATLINEQWLLTTAK	1,Oxidation[M];	2245.8	4-5-2-0-0	6,	0	0	10	0.21359	0.17581	4.56511	0.80261	y1+;y2+;y3+;y4+;y5+;y6+;y7+;y9+;y10+;y11+;	y3+;y4+;y5+;y6+;	No
MS2.28036.28036.3.1.dta	4795.96	2355.07	3	GLTFQQJASSMCVPDQDTAIR	11,Oxidation[M];12,Carbamidomethyl[C];	2440.86	7-5-1-0-0	7,	0	0	6	0.3006	0.20802	3.84588	0.80001	y1+;y4+;y5+;y6+;y8+;y10+;	y4+;y6+;y8+;	No
MS2.11601.11601.3.0.dta	3344.37	1284.62	3	YKJNSDISSTR	-	2059.73	5-4-1-0-1	3,	3	0.17547	2	0.10931	0.19844	4.01971	0.79768	y5+;y7+;Y0+;Y1+;Y2+;	y5+;Y0+;Y1+;	No
MS2.11601.11601.3.1.dta	3345.37	1284.62	3	YKJNSDISSTR	-	2060.76	5-4-0-0-3	3,	3	0.17547	2	0.10931	0.19844	4.01971	0.79768	y5+;y7+;Y0+;Y1+;Y2+;	y5+;Y0+;Y1+;	No
MS2.34667.34667.4.0.dta	5327.32	3413.63	4	SLGNVJFTVSAEALESQELCGTEVPSVPEHGR	20,Carbamidomethyl[C];	1913.68	5-4-1-0-0	6,	0	0	4	0.3732	0.20803	3.8331	0.79741	y3+;y5+;y8+;y9+;	y3+;y5+;y8+;	No
MS2.30516.30516.3.0.dta	3709.68	1795.01	3	VVLHPJYSQVDIGLIK	-	1914.7	5-4-0-0-2	6,	0	0	8	0.1957	0.17491	4.55026	0.79588	b2+;b4+;b9+;y1+;y2+;y4+;y5+;y6+;	b4+;y2+;y4+;y5+;	No
MS2.31049.31049.3.0.dta	3085.31	1008.54	3	VSJQTLSLF	-	2076.75	6-4-0-0-2	3,	2	0.033	6	0.1453	0.19584	4.06094	0.79529	b4+;b5+;b6+;b7+;b8+;y5+;Y0+;Y0+;	b4+;b5+;b6+;	Yes	2	1	1
MS2.23736.23736.4.0.dta	4759.81	1920.85	4	QQJASSMCVPDQDTAIR	8,Carbamidomethyl[C];	2839	10-6-0-0-0	3,	0	0	6	0.28804	0.20726	3.8331	0.79446	y1+;y3+;y4+;y5+;y6+;y8+;	y4+;y6+;y8+;	No
MS2.4582.4582.3.0.dta	2948.24	1284.62	3	YKJNSDISSTR	-	1663.61	4-5-0-0-0	3,	2	0.17122	2	0.14326	0.19705	4.01971	0.7921	y4+;y5+;Y1+;Y2+;	y5+;Y1+;Y2+;	No
MS2.31347.31347.4.5.dta	5281.18	1744.89	4	YFTPJKTEDTIFLR	-	3536.28	8-6-1-0-5	5,	8	0.11091	7	0.06769	0.20559	3.85241	0.792	b2+;b3+;y3+;y5+;y6+;y7+;y8+;Y1+;Y1+;Y0++;Y0++;Y1++;Y1++;Y2++;Y3++;	y5+;Y1+;Y1++;	No
MS2.31347.31347.4.1.dta	5280.17	1744.89	4	YFTPJKTEDTIFLR	-	3535.26	8-6-2-0-3	5,	8	0.11091	7	0.06769	0.20559	3.85241	0.792	b2+;b3+;y3+;y5+;y6+;y7+;y8+;Y1+;Y1+;Y0++;Y0++;Y1++;Y1++;Y2++;Y3++;	y5+;Y1+;Y1++;	No
MS2.31347.31347.4.0.dta	5279.17	1744.89	4	YFTPJKTEDTIFLR	-	3534.24	8-6-3-0-1	5,	8	0.11091	7	0.06769	0.20559	3.85241	0.792	b2+;b3+;y3+;y5+;y6+;y7+;y8+;Y1+;Y1+;Y0++;Y0++;Y1++;Y1++;Y2++;Y3++;	y5+;Y1+;Y1++;	No
MS2.33009.33009.4.0.dta	4593.07	2679.39	4	MVSHHJLTTGATLINEQWLLTTAK	-	1913.68	5-4-1-0-0	6,	0	0	10	0.24621	0.205	3.85904	0.79112	b4+;b5+;b7+;y1+;y2+;y3+;y4+;y5+;y6+;y7+;	y4+;y5+;y6+;	No
MS2.33009.33009.4.1.dta	4594.08	2679.39	4	MVSHHJLTTGATLINEQWLLTTAK	-	1914.7	5-4-0-0-2	6,	0	0	10	0.24621	0.205	3.85904	0.79112	b4+;b5+;b7+;y1+;y2+;y3+;y4+;y5+;y6+;y7+;	y4+;y5+;y6+;	No
MS2.3361.3361.3.1.dta	3221.23	796.347	3	NEEYJK	-	2424.87	6-5-1-0-1	5,	3	0.20815	2	0.04087	0.19108	4.13193	0.78955	b2+;b3+;Y0+;Y0+;Y1+;	b3+;Y0+;Y1+;	No
MS2.3361.3361.3.0.dta	3222.23	796.347	3	NEEYJK	-	2425.89	6-5-0-0-3	5,	3	0.20815	2	0.04087	0.19108	4.13193	0.78955	b2+;b3+;Y0+;Y0+;Y1+;	b3+;Y0+;Y1+;	No
MS2.25248.25248.3.0.dta	3850.72	1408.82	3	LVPVPITJATLDR	-	2441.88	7-5-0-0-2	8,	6	0.15519	8	0.08215	0.2489	3.15914	0.78631	b3+;b4+;y1+;y2+;y4+;y5+;y9+;y11+;Y0+;Y0+;Y1+;Y1+;Y2+;Y3+;	y1+;Y1+;	Yes	1	1	1
MS2.5060.5060.3.0.dta	3303.34	1284.62	3	YKJNSDISSTR	-	2018.71	6-3-1-0-1	3,	3	0.15057	5	0.1062	0.20214	3.87262	0.78281	y1+;y4+;y5+;y7+;y8+;Y0+;Y1+;Y1++;	y5+;Y1+;Y1++;	Yes	3	1	1
MS2.5060.5060.3.1.dta	3304.33	1284.62	3	YKJNSDISSTR	-	2019.73	6-3-0-0-3	3,	3	0.15057	5	0.1062	0.20214	3.87262	0.78281	y1+;y4+;y5+;y7+;y8+;Y0+;Y1+;Y1++;	y5+;Y1+;Y1++;	No
MS2.10950.10950.3.1.dta	2979.23	1284.62	3	YKJNSDISSTR	-	1694.6	4-3-1-0-1	3,	3	0.2141	1	0.04585	0.16399	4.74648	0.77836	y5+;Y0+;Y0+;Y1+;	y5+;Y0+;Y0+;Y1+;	No
MS2.10950.10950.3.2.dta	2980.24	1284.62	3	YKJNSDISSTR	-	1695.62	4-3-0-0-3	3,	3	0.2141	1	0.04585	0.16399	4.74648	0.77836	y5+;Y0+;Y0+;Y1+;	y5+;Y0+;Y0+;Y1+;	No
MS2.5269.5269.3.0.dta	3141.28	1284.62	3	YKJNSDISSTR	-	1856.66	5-3-1-0-1	3,	3	0.01737	6	0.24194	0.24192	3.19058	0.77188	y1+;y3+;y4+;y5+;y6+;y7+;Y0+;Y1+;Y1+;	y5+;y7+;	No
MS2.5269.5269.3.1.dta	3142.27	1284.62	3	YKJNSDISSTR	-	1857.68	5-3-0-0-3	3,	3	0.01737	6	0.24194	0.24192	3.19058	0.77188	y1+;y3+;y4+;y5+;y6+;y7+;Y0+;Y1+;Y1+;	y5+;y7+;	No
MS2.17624.17624.3.0.dta	4183.68	1920.85	3	QQJASSMCVPDQDTAIR	8,Carbamidomethyl[C];	2262.81	5-5-1-0-1	3,	0	0	3	0.33755	0.20083	3.8331	0.76981	y4+;y6+;y8+;	y4+;y6+;y8+;	No
MS2.23011.23011.4.1.dta	4618.9	2339.08	4	GLTFQQJASSMCVPDQDTAIR	12,Carbamidomethyl[C];	2279.83	6-5-0-0-2	7,	0	0	4	0.26612	0.20013	3.83944	0.7684	y1+;y4+;y6+;y8+;	y4+;y6+;y8+;	No
MS2.23011.23011.4.3.dta	4617.92	2339.08	4	GLTFQQJASSMCVPDQDTAIR	12,Carbamidomethyl[C];	2278.81	6-5-1-0-0	7,	0	0	4	0.26612	0.20013	3.83944	0.7684	y1+;y4+;y6+;y8+;	y4+;y6+;y8+;	No
MS2.32550.32550.4.1.dta	5123.33	3541.72	4	SLGNVJFTVSAEALESQELCGTEVPSVPEHGRK	20,Carbamidomethyl[C];	1581.56	6-3-0-0-0	6,	0	0	6	0.33609	0.19996	3.83944	0.76775	b2+;b5+;y3+;y4+;y9+;y10+;	y4+;y9+;y10+;	No
MS2.22432.22432.5.0.dta	4693.79	1920.85	5	QQJASSMCVPDQDTAIR	8,Carbamidomethyl[C];	2772.98	6-6-2-0-0	3,	0	0	5	0.21372	0.16919	4.53585	0.76741	y1+;y3+;y4+;y6+;y8+;	y1+;y4+;y6+;y8+;	No
MS2.26477.26477.3.2.dta	4025.72	1891.96	3	FYFTPJKTEDTIFLR	-	2133.77	6-5-0-0-1	6,	0	0	7	0.23218	0.19812	3.85904	0.76455	b2+;y1+;y3+;y5+;y6+;y7+;y8+;	y1+;y5+;y8+;	No
MS2.5380.5380.3.1.dta	2980.22	1284.62	3	YKJNSDISSTR	-	1695.62	4-3-0-0-3	3,	2	0.00946	8	0.20903	0.23951	3.19058	0.76416	b3+;y1+;y2+;y3+;y4+;y5+;y6+;y7+;Y0+;Y1+;	y5+;y7+;	No
MS2.5380.5380.3.0.dta	2979.23	1284.62	3	YKJNSDISSTR	-	1694.6	4-3-1-0-1	3,	2	0.00946	8	0.20903	0.23951	3.19058	0.76416	b3+;y1+;y2+;y3+;y4+;y5+;y6+;y7+;Y0+;Y1+;	y5+;y7+;	No
MS2.27726.27726.4.0.dta	4825.99	1744.89	4	YFTPJKTEDTIFLR	-	3081.09	7-6-2-0-1	5,	4	0.08951	6	0.12023	0.19805	3.85241	0.76298	b2+;y1+;y5+;y6+;y7+;y8+;Y1+;Y0++;Y1++;Y2++;	y5+;Y1+;Y1++;	No
MS2.32236.32236.5.0.dta	4593.09	2679.39	5	MVSHHJLTTGATLINEQWLLTTAK	-	1913.68	5-4-1-0-0	6,	0	0	9	0.25949	0.19762	3.85904	0.76263	b4+;b5+;y1+;y2+;y3+;y4+;y5+;y6+;y7+;	y4+;y5+;y6+;	Yes	2	1	1
MS2.4275.4275.3.3.dta	3347.3	776.39	3	EJGTISR	-	2570.93	6-5-1-0-2	2,	6	0.21551	1	0.00814	0.18527	4.10684	0.76087	y1+;Y0+;Y1+;Y1+;Y2+;Y3+;Y4+;	Y1+;Y2+;Y4+;	No
MS2.4275.4275.3.2.dta	3346.31	776.39	3	EJGTISR	-	2569.9	6-5-2-0-0	2,	6	0.21551	1	0.00814	0.18527	4.10684	0.76087	y1+;Y0+;Y1+;Y1+;Y2+;Y3+;Y4+;	Y1+;Y2+;Y4+;	No
MS2.18738.18738.4.2.dta	4675.91	2339.08	4	GLTFQQJASSMCVPDQDTAIR	12,Carbamidomethyl[C];	2336.85	6-6-0-0-1	7,	0	0	4	0.26309	0.19801	3.83944	0.76025	y1+;y4+;y6+;y8+;	y4+;y6+;y8+;	No
MS2.23624.23624.3.0.dta	4286.78	2381.1	3	STGKPTLYJVSLVMSDTAGTCY	14,Oxidation[M];21,Carbamidomethyl[C];	1905.66	8-3-0-0-0	9,	0	0	11	0.26358	0.19855	3.82685	0.7598	b4+;b7+;b8+;b9+;b10+;b12+;b13+;y1+;y2+;y3+;y5+;	b7+;b10+;y2+;	No
MS2.23624.23624.3.2.dta	4288.78	2381.1	3	STGKPTLYJVSLVMSDTAGTCY	14,Oxidation[M];21,Carbamidomethyl[C];	1907.71	3-7-0-0-0	9,	0	0	11	0.26358	0.19855	3.82685	0.7598	b4+;b7+;b8+;b9+;b10+;b12+;b13+;y1+;y2+;y3+;y5+;	b7+;b10+;y2+;	No
MS2.12857.12857.3.0.dta	3383.44	958.557	3	TPLTAJITK	-	2424.87	6-5-1-0-1	6,	2	0.30399	1	0.03891	0.18612	4.06094	0.75583	b7+;Y0+;Y1+;	b7+;Y0+;Y1+;	No
MS2.12857.12857.3.1.dta	3384.45	958.557	3	TPLTAJITK	-	2425.89	6-5-0-0-3	6,	2	0.30399	1	0.03891	0.18612	4.06094	0.75583	b7+;Y0+;Y1+;	b7+;Y0+;Y1+;	No
MS2.31574.31574.4.1.dta	4941.22	2695.39	4	MVSHHJLTTGATLINEQWLLTTAK	1,Oxidation[M];	2245.8	4-5-2-0-0	6,	0	0	14	0.16827	0.19576	3.85904	0.75545	y2+;y3+;y4+;y5+;y6+;y7+;y8+;y9+;y10+;y12+;y13+;y15+;y16+;y17+;	y3+;y4+;y5+;	No
MS2.27952.27952.3.0.dta	4286.86	1408.82	3	LVPVPITJATLDR	-	2878.02	7-5-2-0-1	8,	6	0.125	9	0.07479	0.23832	3.15914	0.75288	b3+;b4+;y1+;y2+;y3+;y4+;y5+;y9+;y11+;Y0+;Y0+;Y1+;Y1+;Y2+;Y3+;	y1+;Y1+;	Yes	1	1	1
MS2.30403.30403.4.2.dta	4609.96	2184.08	4	LAGKPTHVJVSVVMAEVDGTC	21,Carbamidomethyl[C];	2425.89	6-5-0-0-3	9,	1	0.01359	7	0.20752	0.16627	4.52186	0.75184	b7+;b8+;y1+;y2+;y3+;y4+;y5+;Y1++;	b8+;y1+;y2+;y5+;	No
MS2.30403.30403.4.1.dta	4608.93	2184.08	4	LAGKPTHVJVSVVMAEVDGTC	21,Carbamidomethyl[C];	2424.87	6-5-1-0-1	9,	1	0.01359	7	0.20752	0.16627	4.52186	0.75184	b7+;b8+;y1+;y2+;y3+;y4+;y5+;Y1++;	b8+;y1+;y2+;y5+;	No
MS2.7061.7061.3.2.dta	3345.36	1284.62	3	YKJNSDISSTR	-	2060.76	5-4-0-0-3	3,	3	0.15416	2	0.11321	0.18627	4.01971	0.74875	y4+;y5+;Y0+;Y1+;Y1+;	y5+;Y0+;Y1+;	No
MS2.7061.7061.3.1.dta	3344.36	1284.62	3	YKJNSDISSTR	-	2059.73	5-4-1-0-1	3,	3	0.15416	2	0.11321	0.18627	4.01971	0.74875	y4+;y5+;Y0+;Y1+;Y1+;	y5+;Y0+;Y1+;	Yes	3	1	1
MS2.32503.32503.4.0.dta	4610.1	2679.39	4	MVSHHJLTTGATLINEQWLLTTAK	-	1930.69	6-4-0-0-1	6,	2	0.0197	8	0.1561	0.1638	4.56511	0.74778	b5+;y2+;y3+;y4+;y5+;y6+;y7+;y9+;Y0++;Y1++;	y3+;y4+;y5+;y7+;	Yes	1	1	1
MS2.25766.25766.3.0.dta	3507.52	1593.83	3	SIJTTNVMGTSLTVR	-	1913.68	5-4-1-0-0	3,	5	0.09234	12	0.08368	0.23858	3.1303	0.74684	b4+;y1+;y3+;y4+;y5+;y7+;y8+;y9+;y10+;y11+;y12+;y13+;Y0+;Y0+;Y1+;Y1+;Y2+;	y8+;Y1+;	Yes	1	1	1
MS2.33133.33133.3.0.dta	4954.18	3413.63	3	SLGNVJFTVSAEALESQELCGTEVPSVPEHGR	20,Carbamidomethyl[C];	1540.53	7-2-0-0-0	6,	0	0	4	0.32925	0.19481	3.8331	0.74671	y3+;y5+;y8+;y9+;	y5+;y8+;y9+;	No
MS2.6581.6581.3.0.dta	2979.22	1284.62	3	YKJNSDISSTR	-	1694.6	4-3-1-0-1	3,	3	0.23675	1	0.07211	0.16297	4.58043	0.74645	y5+;Y0+;Y1+;Y0++;	y5+;Y0+;Y1+;Y0++;	Yes	3	1	1
MS2.6581.6581.3.1.dta	2980.24	1284.62	3	YKJNSDISSTR	-	1695.62	4-3-0-0-3	3,	3	0.23675	1	0.07211	0.16297	4.58043	0.74645	y5+;Y0+;Y1+;Y0++;	y5+;Y0+;Y1+;Y0++;	No
MS2.23625.23625.4.0.dta	4124.72	2381.1	4	STGKPTLYJVSLVMSDTAGTCY	14,Oxidation[M];21,Carbamidomethyl[C];	1743.61	7-3-0-0-0	9,	0	0	9	0.23775	0.16471	4.52881	0.74592	b7+;b8+;b9+;b10+;b11+;y1+;y2+;y3+;y4+;	b7+;b10+;y1+;y2+;	No
MS2.12594.12594.3.0.dta	3121.28	1555.71	3	THTJISESHPJATF	-	1565.56	5-3-0-0-1	4,	1	0.03484	3	0.26534	0.16445	4.53585	0.7459	b2+;b5+;y5+;Y1++;	b2+;b5+;y5+;Y1++;	No
MS2.27045.27045.3.0.dta	3507.52	1593.83	3	SIJTTNVMGTSLTVR	-	1913.68	5-4-1-0-0	3,	3	0.1113	5	0.11888	0.18788	3.94791	0.74173	y1+;y7+;y8+;y10+;y12+;Y0+;Y0+;Y1+;	y1+;y8+;Y1+;	No
MS2.27045.27045.3.2.dta	3508.51	1593.83	3	SIJTTNVMGTSLTVR	-	1914.7	5-4-0-0-2	3,	3	0.1113	5	0.11888	0.18788	3.94791	0.74173	y1+;y7+;y8+;y10+;y12+;Y0+;Y0+;Y1+;	y1+;y8+;Y1+;	No
MS2.3793.3793.3.0.dta	3092.19	796.347	3	NEEYJK	-	2295.82	7-5-0-0-1	5,	3	0.08215	4	0.04802	0.17946	4.13193	0.74153	b2+;b3+;y2+;y3+;Y0+;Y0+;Y1+;	b3+;Y0+;Y1+;	Yes	1	1	1
MS2.31828.31828.3.0.dta	4017.79	1795.01	3	VVLHPJYSQVDIGLIK	-	2222.81	6-4-0-0-3	6,	0	0	10	0.20119	0.19244	3.84588	0.74008	b2+;b4+;b6+;y1+;y2+;y3+;y4+;y5+;y6+;y7+;	b4+;y4+;y5+;	No
MS2.4200.4200.3.1.dta	3366.26	796.347	3	NEEYJK	-	2569.9	6-5-2-0-0	5,	3	0.09588	6	0.04874	0.22501	3.2847	0.73908	b2+;b3+;b4+;y2+;y3+;y4+;Y0+;Y0+;Y1+;	Y0+;Y1+;	Yes	1	1	1
MS2.4200.4200.3.3.dta	3368.28	796.347	3	NEEYJK	-	2571.95	6-5-0-0-4	5,	3	0.09588	6	0.04874	0.22501	3.2847	0.73908	b2+;b3+;b4+;y2+;y3+;y4+;Y0+;Y0+;Y1+;	Y0+;Y1+;	No
MS2.4200.4200.3.2.dta	3367.26	796.347	3	NEEYJK	-	2570.93	6-5-1-0-2	5,	3	0.09588	6	0.04874	0.22501	3.2847	0.73908	b2+;b3+;b4+;y2+;y3+;y4+;Y0+;Y0+;Y1+;	Y0+;Y1+;	Yes	1	1	1
MS2.8724.8724.3.0.dta	3412.32	769.388	3	YFTPJK	-	2642.95	5-4-2-0-3	5,	2	0.09238	2	0.08145	0.1786	4.13193	0.73795	y3+;y4+;Y0+;Y1+;	y3+;Y0+;Y1+;	No
MS2.8724.8724.3.1.dta	3413.35	769.388	3	YFTPJK	-	2643.94	7-6-1-0-0	5,	2	0.09238	2	0.08145	0.1786	4.13193	0.73795	y3+;y4+;Y0+;Y1+;	y3+;Y0+;Y1+;	No
MS2.8724.8724.3.2.dta	3414.35	769.388	3	YFTPJK	-	2644.96	7-6-0-0-2	5,	2	0.09238	2	0.08145	0.1786	4.13193	0.73795	y3+;y4+;Y0+;Y1+;	y3+;Y0+;Y1+;	No
MS2.27739.27739.3.1.dta	4419.78	1920.85	3	QQJASSMCVPDQDTAIR	8,Carbamidomethyl[C];	2498.9	7-6-0-0-1	3,	0	0	4	0.28786	0.19205	3.8331	0.73615	y1+;y4+;y6+;y8+;	y4+;y6+;y8+;	No
MS2.13003.13003.3.0.dta	3035.32	958.557	3	TPLTAJITK	-	2076.75	6-4-0-0-2	6,	5	0.05777	9	0.04594	0.22819	3.22517	0.73596	b3+;b4+;b5+;b6+;b7+;b8+;y4+;y5+;y6+;Y0+;Y0+;Y1+;Y1+;Y2+;	Y0+;Y1+;	Yes	1	1	1
MS2.34333.34333.4.2.dta	5328.34	3413.63	4	SLGNVJFTVSAEALESQELCGTEVPSVPEHGR	20,Carbamidomethyl[C];	1914.7	5-4-0-0-2	6,	0	0	5	0.30656	0.1919	3.8331	0.73559	b2+;y3+;y5+;y8+;y9+;	y3+;y5+;y8+;	No
MS2.34333.34333.4.1.dta	5327.33	3413.63	4	SLGNVJFTVSAEALESQELCGTEVPSVPEHGR	20,Carbamidomethyl[C];	1913.68	5-4-1-0-0	6,	0	0	5	0.30656	0.1919	3.8331	0.73559	b2+;y3+;y5+;y8+;y9+;	y3+;y5+;y8+;	No
MS2.28494.28494.4.0.dta	4476.87	1744.89	4	YFTPJKTEDTIFLR	-	2731.96	7-5-2-0-0	5,	6	0.14775	4	0.08494	0.19066	3.85241	0.73449	b2+;y1+;y5+;y8+;Y1+;Y0++;Y0++;Y1++;Y1++;Y2++;	y5+;Y1+;Y1++;	No
MS2.12444.12444.3.2.dta	3345.36	1284.62	3	YKJNSDISSTR	-	2060.76	5-4-0-0-3	3,	2	0.15597	2	0.12241	0.18261	4.01971	0.73404	y4+;y5+;Y1+;Y3+;	y5+;Y1+;Y3+;	No
MS2.12444.12444.3.1.dta	3344.36	1284.62	3	YKJNSDISSTR	-	2059.73	5-4-1-0-1	3,	2	0.15597	2	0.12241	0.18261	4.01971	0.73404	y4+;y5+;Y1+;Y3+;	y5+;Y1+;Y3+;	Yes	3	1	1
MS2.32920.32920.3.0.dta	4460.87	1744.89	3	YFTPJKTEDTIFLR	-	2715.96	6-5-2-0-1	5,	0	0	8	0.18781	0.19043	3.85241	0.73363	b2+;y1+;y2+;y5+;y6+;y7+;y8+;y11+;	b2+;y5+;y8+;	No
MS2.4979.4979.3.0.dta	3459.4	1284.62	3	YKJNSDISSTR	-	2174.8	5-6-0-0-1	3,	2	0.09236	4	0.16705	0.18904	3.87262	0.73208	y1+;y4+;y5+;y9+;Y1+;Y1++;	y5+;Y1+;Y1++;	No
MS2.7172.7172.2.0.dta	2634.05	1189.51	2	EEQYJSTYR	-	1444.53	3-4-0-0-1	5,	5	0.11883	6	0.09626	0.22641	3.22517	0.73019	b3+;b4+;y1+;y2+;y3+;y4+;Y0+;Y0+;Y1+;Y1+;Y2+;	y1+;Y1+;	No
MS2.34705.34705.4.0.dta	5166.28	3413.63	4	SLGNVJFTVSAEALESQELCGTEVPSVPEHGR	20,Carbamidomethyl[C];	1752.64	4-4-0-0-2	6,	0	0	5	0.32454	0.19048	3.8331	0.73014	b5+;y2+;y3+;y5+;y8+;	y3+;y5+;y8+;	No
MS2.26150.26150.3.0.dta	3483.51	1593.83	3	SIJTTNVMGTSLTVR	-	1889.67	7-3-0-0-1	3,	2	0.10407	5	0.1358	0.18446	3.94791	0.72824	y1+;y7+;y8+;y9+;y10+;Y0+;Y1+;	y1+;y8+;Y1+;	Yes	3	1	1
MS2.6356.6356.3.1.dta	3345.37	1284.62	3	YKJNSDISSTR	-	2060.76	5-4-0-0-3	3,	3	0.18091	3	0.14001	0.22824	3.19058	0.72822	y4+;y5+;y7+;Y0+;Y0+;Y1+;	y5+;Y1+;	No
MS2.6356.6356.3.0.dta	3344.37	1284.62	3	YKJNSDISSTR	-	2059.73	5-4-1-0-1	3,	3	0.18091	3	0.14001	0.22824	3.19058	0.72822	y4+;y5+;y7+;Y0+;Y0+;Y1+;	y5+;Y1+;	Yes	3	1	1
MS2.25540.25540.3.1.dta	3671.6	1740.89	3	FSIJTTNVMGTSLTVR	-	1930.69	6-4-0-0-1	4,	0	0	11	0.18815	0.23195	3.13729	0.7277	y1+;y3+;y4+;y5+;y7+;y8+;y9+;y10+;y11+;y12+;y15+;	y7+;y8+;	No
MS2.35017.35017.4.1.dta	5456.43	3541.72	4	SLGNVJFTVSAEALESQELCGTEVPSVPEHGRK	20,Carbamidomethyl[C];	1914.7	5-4-0-0-2	6,	1	0.01347	4	0.31494	0.18918	3.83944	0.72636	y3+;y4+;y6+;y9+;Y0++;	y4+;y6+;y9+;	No
MS2.10245.10245.3.0.dta	3547.44	1284.62	3	YKJNSDISSTR	-	2262.81	5-5-1-0-1	3,	3	0.21573	1	0.08053	0.18057	4.01971	0.72583	y5+;Y0+;Y1+;Y2+;	y5+;Y1+;Y2+;	No
MS2.24158.24158.3.1.dta	3160.4	1740.89	3	FSIJTTNVMGTSLTVR	-	1419.5	5-3-0-0-0	4,	0	0	4	0.19103	0.15473	4.67479	0.72334	y1+;y7+;y8+;y15+;	y1+;y7+;y8+;y15+;	No
MS2.4126.4126.3.0.dta	4019.57	776.39	3	EJGTISR	-	3243.15	8-6-2-0-1	2,	9	0.23911	1	0.0025	0.22155	3.26366	0.72306	y5+;Y0+;Y0+;Y1+;Y1+;Y2+;Y2+;Y3+;Y4+;Y5+;	Y1+;Y2+;	No
MS2.26103.26103.3.1.dta	3525.54	1740.89	3	FSIJTTNVMGTSLTVR	-	1784.63	6-4-0-0-0	4,	0	0	11	0.18246	0.23045	3.13729	0.723	y1+;y3+;y4+;y5+;y7+;y8+;y9+;y10+;y11+;y12+;y15+;	y7+;y8+;	No
MS2.34819.34819.4.0.dta	5286.31	3413.63	4	SLGNVJFTVSAEALESQELCGTEVPSVPEHGR	20,Carbamidomethyl[C];	1872.65	6-3-1-0-0	6,	0	0	4	0.32244	0.18773	3.8331	0.71957	y3+;y5+;y8+;y9+;	y5+;y8+;y9+;	No
MS2.35359.35359.4.0.dta	5286.29	3413.63	4	SLGNVJFTVSAEALESQELCGTEVPSVPEHGR	20,Carbamidomethyl[C];	1872.65	6-3-1-0-0	6,	0	0	5	0.29722	0.18714	3.8331	0.71733	y3+;y5+;y8+;y9+;y12+;	y5+;y8+;y12+;	No
MS2.34678.34678.4.2.dta	4963.2	3413.63	4	SLGNVJFTVSAEALESQELCGTEVPSVPEHGR	20,Carbamidomethyl[C];	1549.57	4-3-0-0-2	6,	0	0	3	0.36466	0.18706	3.8331	0.71701	y3+;y5+;y8+;	y3+;y5+;y8+;	No
MS2.11465.11465.3.0.dta	2979.23	1284.62	3	YKJNSDISSTR	-	1694.6	4-3-1-0-1	3,	3	0.24211	1	0.04702	0.15568	4.58043	0.71308	y5+;Y1+;Y1++;Y4++;	y5+;Y1+;Y1++;Y4++;	No
MS2.11465.11465.3.1.dta	2980.24	1284.62	3	YKJNSDISSTR	-	1695.62	4-3-0-0-3	3,	3	0.24211	1	0.04702	0.15568	4.58043	0.71308	y5+;Y1+;Y1++;Y4++;	y5+;Y1+;Y1++;Y4++;	No
MS2.38413.38413.4.2.dta	5287.3	3413.63	4	SLGNVJFTVSAEALESQELCGTEVPSVPEHGR	20,Carbamidomethyl[C];	1873.67	6-3-0-0-2	6,	0	0	3	0.3636	0.186	3.8331	0.71297	y2+;y5+;y8+;	y2+;y5+;y8+;	No
MS2.38413.38413.4.0.dta	5286.3	3413.63	4	SLGNVJFTVSAEALESQELCGTEVPSVPEHGR	20,Carbamidomethyl[C];	1872.65	6-3-1-0-0	6,	0	0	3	0.3636	0.186	3.8331	0.71297	y2+;y5+;y8+;	y2+;y5+;y8+;	No
MS2.39908.39908.4.1.dta	4630.07	3413.63	4	SLGNVJFTVSAEALESQELCGTEVPSVPEHGR	20,Carbamidomethyl[C];	1216.42	5-2-0-0-0	6,	0	0	3	0.36355	0.18584	3.8331	0.71233	y3+;y5+;y8+;	y3+;y5+;y8+;	No
MS2.5582.5582.3.0.dta	3547.44	1284.62	3	YKJNSDISSTR	-	2262.81	5-5-1-0-1	3,	3	0.1109	2	0.10644	0.17635	4.01971	0.70887	y5+;y7+;Y0+;Y1+;Y2+;	y5+;Y0+;Y1+;	Yes	3	1	1
MS2.25442.25442.4.2.dta	4705.89	2339.08	4	GLTFQQJASSMCVPDQDTAIR	12,Carbamidomethyl[C];	2366.83	6-4-2-0-0	7,	0	0	4	0.25737	0.18398	3.83944	0.70638	y1+;y4+;y5+;y8+;	y1+;y4+;y8+;	No
MS2.5491.5491.3.2.dta	3403.38	993.46	3	JNSDISSTR	-	2409.89	5-5-0-0-4	1,	1	0.00385	7	0.1613	0.21859	3.22517	0.705	y1+;y3+;y4+;y5+;y6+;y7+;y8+;Y0+;	y5+;y7+;	No
MS2.2651.2651.3.0.dta	2418.94	796.347	3	NEEYJK	-	1622.58	5-4-0-0-0	5,	2	0.24264	1	0.03707	0.17056	4.13193	0.70474	b3+;Y0+;Y1+;	b3+;Y0+;Y1+;	Yes	3	1	1
MS2.33992.33992.4.0.dta	4641.06	1780.02	4	LVPVPITJATLDQITGK	-	2861	6-5-3-0-0	8,	2	0.03869	12	0.12137	0.22418	3.1303	0.70175	b3+;b4+;y3+;y5+;y6+;y7+;y8+;y9+;y10+;y11+;y13+;y15+;Y0+;Y1+;	y13+;Y1+;	Yes	1	1	1
MS2.33992.33992.4.2.dta	4642.06	1780.02	4	LVPVPITJATLDQITGK	-	2862.02	6-5-2-0-2	8,	2	0.03869	12	0.12137	0.22418	3.1303	0.70175	b3+;b4+;y3+;y5+;y6+;y7+;y8+;y9+;y10+;y11+;y13+;y15+;Y0+;Y1+;	y13+;Y1+;	No
MS2.11196.11196.3.1.dta	3234.26	1173.52	3	EEQFJSTYR	-	2060.76	5-4-0-0-3	5,	7	0.2727	2	0.02218	0.21703	3.22517	0.69997	b3+;y1+;Y0+;Y0+;Y1+;Y1+;Y2+;Y3+;Y4+;	Y0+;Y1+;	No
MS2.11196.11196.3.0.dta	3233.26	1173.52	3	EEQFJSTYR	-	2059.73	5-4-1-0-1	5,	7	0.2727	2	0.02218	0.21703	3.22517	0.69997	b3+;y1+;Y0+;Y0+;Y1+;Y1+;Y2+;Y3+;Y4+;	Y0+;Y1+;	Yes	3	1	1
MS2.15509.15509.4.1.dta	4658.94	2339.08	4	GLTFQQJASSMCVPDQDTAIR	12,Carbamidomethyl[C];	2319.84	5-6-1-0-0	7,	0	0	3	0.36199	0.22952	3.03913	0.69753	y4+;y6+;y8+;	y6+;y8+;	No
MS2.34818.34818.4.1.dta	5124.26	3413.63	4	SLGNVJFTVSAEALESQELCGTEVPSVPEHGR	20,Carbamidomethyl[C];	1710.6	5-3-1-0-0	6,	0	0	7	0.36107	0.22975	3.03379	0.69703	b2+;b4+;y3+;y5+;y8+;y9+;y10+;	y5+;y8+;	No
MS2.23153.23153.3.0.dta	3534.38	1183.54	3	GLTFQQJASSM	-	2350.83	5-4-2-0-1	7,	2	0.02635	10	0.11762	0.21841	3.19058	0.69687	b3+;b4+;b5+;b6+;b8+;b9+;b10+;y6+;y7+;y8+;Y0+;Y0+;	b8+;Y0+;	Yes	2	1	1
MS2.23153.23153.3.2.dta	3535.39	1183.54	3	GLTFQQJASSM	-	2351.85	5-4-1-0-3	7,	2	0.02635	10	0.11762	0.21841	3.19058	0.69687	b3+;b4+;b5+;b6+;b8+;b9+;b10+;y6+;y7+;y8+;Y0+;Y0+;	b8+;Y0+;	No
MS2.4991.4991.3.1.dta	3256.37	1284.62	3	YKJNSDISSTR	-	1971.72	5-5-0-0-1	3,	1	0.09292	2	0.16428	0.17304	4.01971	0.69558	y5+;y7+;Y1+;	y5+;y7+;Y1+;	No
MS2.11208.11208.3.1.dta	2979.22	1284.62	3	YKJNSDISSTR	-	1694.6	4-3-1-0-1	3,	1	0.12865	2	0.13265	0.17247	4.01971	0.69329	y5+;y7+;Y1+;	y5+;y7+;Y1+;	No
MS2.24658.24658.3.0.dta	3175.39	1593.83	3	SIJTTNVMGTSLTVR	-	1581.56	6-3-0-0-0	3,	2	0.17633	3	0.12278	0.17543	3.94791	0.69257	y1+;y7+;y8+;Y0+;Y1+;	y1+;y8+;Y1+;	No
MS2.30365.30365.3.0.dta	4650.11	2695.39	3	MVSHHJLTTGATLINEQWLLTTAK	1,Oxidation[M];	1954.7	4-5-1-0-0	6,	0	0	6	0.24824	0.15162	4.56511	0.69218	y2+;y3+;y4+;y5+;y6+;y7+;	y3+;y4+;y5+;y6+;	No
MS2.4323.4323.3.0.dta	2866.18	1284.62	3	YKJNSDISSTR	-	1581.56	6-3-0-0-0	3,	2	0.08758	5	0.14049	0.21683	3.19058	0.69182	y1+;y4+;y5+;y7+;y9+;Y0+;Y1+;	y5+;Y1+;	No
MS2.8647.8647.3.0.dta	3048.21	769.388	3	YFTPJK	-	2278.81	6-5-1-0-0	5,	2	0.15403	1	0.06102	0.16739	4.13193	0.69165	y3+;Y0+;Y1+;	y3+;Y0+;Y1+;	No
MS2.8647.8647.3.1.dta	3049.21	769.388	3	YFTPJK	-	2279.83	6-5-0-0-2	5,	2	0.15403	1	0.06102	0.16739	4.13193	0.69165	y3+;Y0+;Y1+;	y3+;Y0+;Y1+;	No
MS2.25927.25927.3.0.dta	4534.9	1744.89	3	YFTPJKTEDTIFLR	-	2790	7-6-1-0-1	5,	2	0.05523	4	0.18441	0.17915	3.85241	0.69016	y1+;y3+;y5+;y8+;Y0++;Y1++;	y5+;y8+;Y1++;	No
MS2.25927.25927.3.1.dta	4535.91	1744.89	3	YFTPJKTEDTIFLR	-	2791.02	7-6-0-0-3	5,	2	0.05523	4	0.18441	0.17915	3.85241	0.69016	y1+;y3+;y5+;y8+;Y0++;Y1++;	y5+;y8+;Y1++;	No
MS2.20663.20663.4.0.dta	4746.94	2339.08	4	GLTFQQJASSMCVPDQDTAIR	12,Carbamidomethyl[C];	2407.85	5-5-2-0-0	7,	0	0	17	0.15569	0.22693	3.03913	0.68966	b3+;b5+;b6+;b7+;b8+;b9+;b10+;y1+;y2+;y3+;y4+;y5+;y6+;y7+;y9+;y10+;y12+;	y4+;y6+;	No
MS2.20663.20663.4.3.dta	4747.95	2339.08	4	GLTFQQJASSMCVPDQDTAIR	12,Carbamidomethyl[C];	2408.87	5-5-1-0-2	7,	0	0	17	0.15569	0.22693	3.03913	0.68966	b3+;b5+;b6+;b7+;b8+;b9+;b10+;y1+;y2+;y3+;y4+;y5+;y6+;y7+;y9+;y10+;y12+;	y4+;y6+;	No
MS2.18976.18976.4.3.dta	4127.84	2067.09	4	TCTAAHPELKTPLTAJITK	2,Carbamidomethyl[C];	2060.76	5-4-0-0-3	16,	2	0.12119	3	0.12045	0.15194	4.52881	0.68811	b6+;b9+;b10+;Y0++;Y1++;	b6+;b10+;Y0++;Y1++;	No
MS2.18976.18976.4.1.dta	4126.83	2067.09	4	TCTAAHPELKTPLTAJITK	2,Carbamidomethyl[C];	2059.73	5-4-1-0-1	16,	2	0.12119	3	0.12045	0.15194	4.52881	0.68811	b6+;b9+;b10+;Y0++;Y1++;	b6+;b10+;Y0++;Y1++;	Yes	3	1	1
MS2.3386.3386.3.2.dta	2727.06	796.347	3	NEEYJK	-	1930.69	6-4-0-0-1	5,	3	0.04622	6	0.06755	0.20885	3.2847	0.68599	b2+;b3+;b4+;b5+;y2+;y3+;Y0+;Y0+;Y1+;	b3+;Y0+;	Yes	1	1	1
MS2.23338.23338.4.1.dta	4689.91	2339.08	4	GLTFQQJASSMCVPDQDTAIR	12,Carbamidomethyl[C];	2350.83	5-4-2-0-1	7,	0	0	4	0.20562	0.17804	3.83944	0.68356	y1+;y4+;y6+;y8+;	y4+;y6+;y8+;	No
MS2.37116.37116.4.1.dta	5252.34	3541.72	4	SLGNVJFTVSAEALESQELCGTEVPSVPEHGRK	20,Carbamidomethyl[C];	1710.6	5-3-1-0-0	6,	0	0	4	0.31208	0.178	3.83944	0.68344	y3+;y4+;y6+;y9+;	y4+;y6+;y9+;	No
MS2.38593.38593.4.1.dta	4979.2	3413.63	4	SLGNVJFTVSAEALESQELCGTEVPSVPEHGR	20,Carbamidomethyl[C];	1565.56	5-3-0-0-1	6,	0	0	3	0.34747	0.17827	3.8331	0.68334	y3+;y5+;y8+;	y3+;y5+;y8+;	No
MS2.25084.25084.4.1.dta	3871.63	1196.66	4	PVPITJATLDR	-	2674.94	7-4-2-0-1	6,	1	0.02463	6	0.14616	0.16967	4.01971	0.68204	b2+;y1+;y2+;y4+;y5+;y9+;Y1+;	b2+;y1+;Y1+;	No
MS2.25840.25840.3.1.dta	3674.59	2052	3	MVSHHJLTTGATLINEQW	-	1622.58	5-4-0-0-0	6,	0	0	9	0.14056	0.14976	4.543	0.68037	b4+;b5+;b6+;b7+;b8+;b11+;b14+;y2+;y3+;	b5+;b6+;b7+;y2+;	No
MS2.34003.34003.3.2.dta	4789.11	1780.02	3	LVPVPITJATLDQITGK	-	3009.07	8-7-1-0-0	8,	2	0.02562	10	0.1508	0.21725	3.1303	0.68006	b3+;y3+;y5+;y6+;y7+;y8+;y9+;y11+;y13+;y15+;Y0+;Y1+;	y8+;y13+;	Yes	1	1	1
MS2.34003.34003.3.1.dta	4787.13	1780.02	3	LVPVPITJATLDQITGK	-	3007.06	6-5-3-0-1	8,	2	0.02562	10	0.1508	0.21725	3.1303	0.68006	b3+;y3+;y5+;y6+;y7+;y8+;y9+;y11+;y13+;y15+;Y0+;Y1+;	y8+;y13+;	Yes	1	1	1
MS2.25297.25297.3.0.dta	3653.57	1593.83	3	SIJTTNVMGTSLTVR	-	2059.73	5-4-1-0-1	3,	2	0.09887	5	0.12081	0.17185	3.94791	0.67843	y1+;y4+;y7+;y8+;y10+;Y0+;Y1+;	y7+;y8+;Y1+;	Yes	3	1	1
MS2.25856.25856.4.3.dta	4244.83	2184.08	4	LAGKPTHVJVSVVMAEVDGTC	21,Carbamidomethyl[C];	2060.76	5-4-0-0-3	9,	0	0	5	0.22609	0.14614	4.61548	0.6745	b8+;y1+;y2+;y4+;y5+;	y1+;y2+;y4+;y5+;	No
MS2.25856.25856.4.1.dta	4243.83	2184.08	4	LAGKPTHVJVSVVMAEVDGTC	21,Carbamidomethyl[C];	2059.73	5-4-1-0-1	9,	0	0	5	0.22609	0.14614	4.61548	0.6745	b8+;y1+;y2+;y4+;y5+;	y1+;y2+;y4+;y5+;	Yes	3	1	1
MS2.27762.27762.3.1.dta	3966.69	2052	3	MVSHHJLTTGATLINEQW	-	1914.7	5-4-0-0-2	6,	0	0	12	0.13048	0.1754	3.83944	0.67343	b4+;b5+;b6+;b7+;b8+;b11+;b12+;b13+;b14+;y2+;y5+;y13+;	b5+;b6+;b7+;	Yes	1	1	1
MS2.27762.27762.3.0.dta	3965.69	2052	3	MVSHHJLTTGATLINEQW	-	1913.68	5-4-1-0-0	6,	0	0	12	0.13048	0.1754	3.83944	0.67343	b4+;b5+;b6+;b7+;b8+;b11+;b12+;b13+;b14+;y2+;y5+;y13+;	b5+;b6+;b7+;	Yes	2	1	1
MS2.28315.28315.4.1.dta	4911.03	2339.08	4	GLTFQQJASSMCVPDQDTAIR	12,Carbamidomethyl[C];	2571.95	6-5-0-0-4	7,	0	0	4	0.20613	0.17513	3.83944	0.67242	y1+;y4+;y6+;y8+;	y4+;y6+;y8+;	No
MS2.28315.28315.4.0.dta	4910.03	2339.08	4	GLTFQQJASSMCVPDQDTAIR	12,Carbamidomethyl[C];	2570.93	6-5-1-0-2	7,	0	0	4	0.20613	0.17513	3.83944	0.67242	y1+;y4+;y6+;y8+;	y4+;y6+;y8+;	No
MS2.25602.25602.3.1.dta	3491.5	2355.07	3	GLTFQQJASSMCVPDQDTAIR	11,Oxidation[M];12,Carbamidomethyl[C];	1136.42	2-4-0-0-0	7,	0	0	4	0.20359	0.14763	4.55026	0.67175	y1+;y4+;y6+;y8+;	y1+;y4+;y6+;y8+;	Yes	3	0	0
MS2.15783.15783.3.0.dta	3344.37	1284.62	3	YKJNSDISSTR	-	2059.73	5-4-1-0-1	3,	2	0.13392	2	0.10478	0.16686	4.01971	0.67075	y4+;y5+;Y0+;Y1+;	y5+;Y0+;Y1+;	No
MS2.35558.35558.4.3.dta	5125.27	3413.63	4	SLGNVJFTVSAEALESQELCGTEVPSVPEHGR	20,Carbamidomethyl[C];	1711.62	5-3-0-0-2	6,	0	0	8	0.32029	0.22094	3.03379	0.67028	b2+;y1+;y2+;y3+;y5+;y8+;y9+;y14+;	y5+;y8+;	No
MS2.38302.38302.4.0.dta	5124.28	3413.63	4	SLGNVJFTVSAEALESQELCGTEVPSVPEHGR	20,Carbamidomethyl[C];	1710.6	5-3-1-0-0	6,	0	0	3	0.32792	0.17471	3.8331	0.66969	b2+;y5+;y8+;	b2+;y5+;y8+;	No
MS2.25741.25741.3.0.dta	3305.43	1593.83	3	SIJTTNVMGTSLTVR	-	1711.62	5-3-0-0-2	3,	1	0.08088	5	0.14501	0.16949	3.94791	0.66914	y1+;y3+;y7+;y8+;y10+;Y1+;	y7+;y8+;Y1+;	No
MS2.32761.32761.4.0.dta	4973.08	1891.96	4	FYFTPJKTEDTIFLR	-	3081.09	7-6-2-0-1	6,	4	0.07659	7	0.13709	0.21765	3.05561	0.66504	b2+;y1+;y5+;y6+;y7+;y8+;y11+;Y0++;Y0++;Y1++;Y2++;	y5+;Y1++;	Yes	1	1	1
MS2.24389.24389.3.0.dta	3378.44	1593.83	3	SIJTTNVMGTSLTVR	-	1784.63	6-4-0-0-0	3,	1	0.21197	3	0.10258	0.16832	3.94791	0.6645	y1+;y7+;y8+;Y1+;	y7+;y8+;Y1+;	No
MS2.9888.9888.3.1.dta	3996.54	769.388	3	YFTPJK	-	3227.15	7-6-2-0-2	5,	2	0.17442	1	0.0387	0.16067	4.13193	0.66389	y3+;Y0+;Y1+;	y3+;Y0+;Y1+;	No
MS2.9888.9888.3.0.dta	3995.54	769.388	3	YFTPJK	-	3226.13	7-6-3-0-0	5,	2	0.17442	1	0.0387	0.16067	4.13193	0.66389	y3+;Y0+;Y1+;	y3+;Y0+;Y1+;	No
MS2.13076.13076.3.0.dta	3383.44	958.557	3	TPLTAJITK	-	2424.87	6-5-1-0-1	6,	2	0.25107	1	0.03092	0.16347	4.06094	0.66386	b7+;Y0+;Y1+;	b7+;Y0+;Y1+;	No
MS2.13076.13076.3.1.dta	3384.44	958.557	3	TPLTAJITK	-	2425.89	6-5-0-0-3	6,	2	0.25107	1	0.03092	0.16347	4.06094	0.66386	b7+;Y0+;Y1+;	b7+;Y0+;Y1+;	No
MS2.3373.3373.3.1.dta	3076.17	796.347	3	NEEYJK	-	2279.83	6-5-0-0-2	5,	2	0.12328	4	0.07114	0.20186	3.2847	0.66304	b2+;b3+;y2+;y4+;Y0+;Y0+;	b3+;Y0+;	No
MS2.3373.3373.3.0.dta	3075.17	796.347	3	NEEYJK	-	2278.81	6-5-1-0-0	5,	2	0.12328	4	0.07114	0.20186	3.2847	0.66304	b2+;b3+;y2+;y4+;Y0+;Y0+;	b3+;Y0+;	Yes	1	1	1
MS2.27349.27349.4.0.dta	4397.82	2355.07	4	GLTFQQJASSMCVPDQDTAIR	11,Oxidation[M];12,Carbamidomethyl[C];	2042.72	4-4-2-0-0	7,	0	0	4	0.25598	0.17231	3.84588	0.66269	y4+;y6+;y8+;y10+;	y4+;y8+;y10+;	No
MS2.37022.37022.5.0.dta	4962.16	3413.63	5	SLGNVJFTVSAEALESQELCGTEVPSVPEHGR	20,Carbamidomethyl[C];	1548.54	4-3-1-0-0	6,	0	0	3	0.32552	0.17269	3.8331	0.66193	y3+;y5+;y8+;	y3+;y5+;y8+;	No
MS2.38017.38017.4.2.dta	5253.34	3541.72	4	SLGNVJFTVSAEALESQELCGTEVPSVPEHGRK	20,Carbamidomethyl[C];	1711.62	5-3-0-0-2	6,	0	0	3	0.32484	0.17193	3.83944	0.66013	y4+;y6+;y9+;	y4+;y6+;y9+;	No
MS2.38017.38017.4.1.dta	5252.34	3541.72	4	SLGNVJFTVSAEALESQELCGTEVPSVPEHGRK	20,Carbamidomethyl[C];	1710.6	5-3-1-0-0	6,	0	0	3	0.32484	0.17193	3.83944	0.66013	y4+;y6+;y9+;	y4+;y6+;y9+;	No
MS2.36886.36886.5.0.dta	5455.41	3541.72	5	SLGNVJFTVSAEALESQELCGTEVPSVPEHGRK	20,Carbamidomethyl[C];	1913.68	5-4-1-0-0	6,	0	0	4	0.2971	0.1719	3.83944	0.66	b4+;y4+;y6+;y9+;	y4+;y6+;y9+;	No
MS2.12807.12807.4.1.dta	4216.7	1920.85	4	QQJASSMCVPDQDTAIR	8,Carbamidomethyl[C];	2295.82	7-5-0-0-1	3,	0	0	3	0.26318	0.17173	3.8331	0.65824	y4+;y6+;y8+;	y4+;y6+;y8+;	No
MS2.4251.4251.3.0.dta	2825.13	1284.62	3	YKJNSDISSTR	-	1540.53	7-2-0-0-0	3,	1	0.06696	3	0.13894	0.16367	4.01971	0.6579	y1+;y5+;y9+;Y1+;	y5+;y9+;Y1+;	No
MS2.29507.29507.3.0.dta	4988.02	1744.89	3	YFTPJKTEDTIFLR	-	3243.15	8-6-2-0-1	5,	4	0.06032	6	0.18635	0.21557	3.05003	0.65749	b2+;y1+;y3+;y5+;y6+;y8+;Y0++;Y0++;Y1++;Y1++;	y5+;Y1++;	Yes	3	1	1
MS2.30219.30219.4.0.dta	4446.91	2184.08	4	LAGKPTHVJVSVVMAEVDGTC	21,Carbamidomethyl[C];	2262.81	5-5-1-0-1	9,	0	0	8	0.21812	0.17199	3.82069	0.65712	b7+;b8+;b10+;y1+;y2+;y3+;y4+;y5+;	b8+;y1+;y2+;	No
MS2.28024.28024.3.0.dta	4269.83	1408.82	3	LVPVPITJATLDR	-	2861	6-5-3-0-0	8,	6	0.13036	6	0.06565	0.2075	3.15914	0.65552	b3+;y1+;y4+;y5+;y9+;y11+;Y0+;Y0+;Y1+;Y1+;Y2+;Y3+;	y1+;Y1+;	Yes	1	1	1
MS2.27527.27527.5.0.dta	4756.02	2184.08	5	LAGKPTHVJVSVVMAEVDGTC	21,Carbamidomethyl[C];	2571.95	6-5-0-0-4	9,	0	0	5	0.22601	0.14457	4.52186	0.65374	b8+;y1+;y2+;y4+;y5+;	y1+;y2+;y4+;y5+;	No
MS2.4089.4089.3.2.dta	2907.15	993.46	3	JNSDISSTR	-	1913.68	5-4-1-0-0	1,	7	0.10925	5	0.04082	0.2023	3.22517	0.65244	b2+;y1+;y4+;y6+;y7+;Y0+;Y0+;Y1+;Y1+;Y2+;Y3+;Y4+;	y4+;Y1+;	Yes	1	1	1
MS2.3731.3731.3.0.dta	2690.07	776.39	3	EJGTISR	-	1913.68	5-4-1-0-0	2,	4	0.16501	2	0.01344	0.15864	4.10684	0.65153	b2+;y1+;Y2+;Y3+;Y4+;Y5+;	Y3+;Y4+;Y5+;	No
MS2.24387.24387.4.3.dta	4098.75	1891.96	4	FYFTPJKTEDTIFLR	-	2206.81	5-4-0-0-4	6,	0	0	9	0.22149	0.21316	3.05561	0.65132	b2+;y1+;y3+;y5+;y6+;y7+;y8+;y9+;y14+;	y5+;y8+;	No
MS2.6655.6655.3.0.dta	3594.41	1284.62	3	YKJNSDISSTR	-	2309.8	6-3-2-0-1	3,	2	0.1393	1	0.12109	0.16022	4.01971	0.64402	y5+;Y0+;Y1+;	y5+;Y0+;Y1+;	No
MS2.32098.32098.3.0.dta	4067.71	2381.1	3	STGKPTLYJVSLVMSDTAGTCY	14,Oxidation[M];21,Carbamidomethyl[C];	1686.59	7-2-0-0-1	9,	0	0	10	0.32877	0.21226	3.02854	0.64284	b7+;b8+;b9+;b10+;b11+;b13+;y2+;y3+;y4+;y5+;	b13+;y2+;	No
MS2.38167.38167.4.0.dta	5141.27	3413.63	4	SLGNVJFTVSAEALESQELCGTEVPSVPEHGR	20,Carbamidomethyl[C];	1727.61	6-3-0-0-1	6,	0	0	2	0.46897	0.21133	3.03379	0.64112	y5+;y8+;	y5+;y8+;	No
MS2.7553.7553.3.0.dta	2634.05	1189.51	3	EEQYJSTYR	-	1444.53	3-4-0-0-1	5,	2	0.30697	1	0.02687	0.15751	4.06094	0.63963	y1+;Y0+;Y1+;	y1+;Y0+;Y1+;	No
MS2.7788.7788.3.1.dta	3250.27	1189.51	3	EEQYJSTYR	-	2060.76	5-4-0-0-3	5,	7	0.16198	11	0.05112	0.29115	2.19368	0.63868	b3+;b4+;b5+;b6+;y1+;y2+;y3+;y4+;y5+;y6+;y7+;Y0+;Y0+;Y1+;Y1+;Y2+;Y3+;Y4+;	Y1+;	No
MS2.4484.4484.3.1.dta	3199.31	1284.62	3	YKJNSDISSTR	-	1914.7	5-4-0-0-2	3,	2	0.0873	4	0.1483	0.20002	3.19058	0.63817	y1+;y4+;y5+;y9+;Y0+;Y1+;	y5+;Y1+;	No
MS2.36275.36275.4.3.dta	5456.43	3541.72	4	SLGNVJFTVSAEALESQELCGTEVPSVPEHGRK	20,Carbamidomethyl[C];	1914.7	5-4-0-0-2	6,	0	0	4	0.28392	0.16598	3.83944	0.63727	y3+;y4+;y6+;y9+;	y4+;y6+;y9+;	No
MS2.36275.36275.4.1.dta	5455.41	3541.72	4	SLGNVJFTVSAEALESQELCGTEVPSVPEHGRK	20,Carbamidomethyl[C];	1913.68	5-4-1-0-0	6,	0	0	4	0.28392	0.16598	3.83944	0.63727	y3+;y4+;y6+;y9+;	y4+;y6+;y9+;	No
MS2.29786.29786.3.0.dta	4622.93	1744.89	3	YFTPJKTEDTIFLR	-	2878.02	7-5-2-0-1	5,	4	0.15902	1	0.12003	0.16541	3.85241	0.63723	y5+;Y1+;Y0++;Y0++;Y1++;	y5+;Y1+;Y1++;	Yes	3	1	1
MS2.31898.31898.3.0.dta	4317.86	1891.96	3	FYFTPJKTEDTIFLR	-	2425.89	6-5-0-0-3	6,	0	0	4	0.24231	0.16487	3.85904	0.63624	b2+;y1+;y5+;y8+;	b2+;y5+;y8+;	No
MS2.13124.13124.2.0.dta	2872.25	958.557	2	TPLTAJITK	-	1913.68	5-4-1-0-0	6,	2	0.21341	1	0.04501	0.15656	4.06094	0.63579	b7+;Y0+;Y1+;	b7+;Y0+;Y1+;	Yes	3	1	1
MS2.5520.5520.3.1.dta	3636.45	1284.62	3	YKJNSDISSTR	-	2351.85	5-4-1-0-3	3,	1	0.02233	4	0.22001	0.19797	3.19058	0.63165	y4+;y5+;y6+;y7+;Y1+;	y5+;y7+;	No
MS2.5520.5520.3.0.dta	3635.47	1284.62	3	YKJNSDISSTR	-	2350.83	5-4-2-0-1	3,	1	0.02233	4	0.22001	0.19797	3.19058	0.63165	y4+;y5+;y6+;y7+;Y1+;	y5+;y7+;	No
MS2.30403.30403.4.5.dta	4607.92	2200.07	4	LAGKPTHVJVSVVMAEVDGTC	14,Oxidation[M];21,Carbamidomethyl[C];	2407.85	5-5-2-0-0	9,	0	0	7	0.20752	0.13965	4.52186	0.63148	b7+;b8+;y1+;y2+;y3+;y4+;y5+;	b8+;y1+;y2+;y5+;	No
MS2.29734.29734.4.0.dta	5117.1	1744.89	4	YFTPJKTEDTIFLR	-	3372.19	7-6-3-0-1	5,	6	0.12222	3	0.07716	0.16343	3.85241	0.62961	b2+;y3+;y5+;Y1+;Y0++;Y0++;Y1++;Y1++;Y2++;	y5+;Y1+;Y1++;	No
MS2.12643.12643.4.0.dta	4240.71	1920.85	4	QQJASSMCVPDQDTAIR	8,Carbamidomethyl[C];	2319.84	5-6-1-0-0	3,	0	0	2	0.38673	0.20735	3.03379	0.62904	y6+;y8+;	y6+;y8+;	No
MS2.12643.12643.4.2.dta	4241.71	1920.85	4	QQJASSMCVPDQDTAIR	8,Carbamidomethyl[C];	2320.86	5-6-0-0-2	3,	0	0	2	0.38673	0.20735	3.03379	0.62904	y6+;y8+;	y6+;y8+;	No
MS2.33882.33882.4.0.dta	4758.1	3541.72	4	SLGNVJFTVSAEALESQELCGTEVPSVPEHGRK	20,Carbamidomethyl[C];	1216.42	5-2-0-0-0	6,	0	0	9	0.28246	0.20697	3.03913	0.629	b2+;b5+;b7+;y3+;y4+;y6+;y10+;y13+;y14+;	y4+;y6+;	No
MS2.30949.30949.3.0.dta	4074.84	1795.01	3	VVLHPJYSQVDIGLIK	-	2279.83	6-5-0-0-2	6,	0	0	8	0.1562	0.16338	3.84588	0.62835	b2+;y1+;y2+;y3+;y4+;y5+;y6+;y12+;	y2+;y4+;y5+;	No
MS2.35495.35495.4.1.dta	5456.44	3541.72	4	SLGNVJFTVSAEALESQELCGTEVPSVPEHGRK	20,Carbamidomethyl[C];	1914.7	5-4-0-0-2	6,	0	0	4	0.27334	0.16333	3.83944	0.62709	y4+;y6+;y9+;y10+;	y4+;y6+;y9+;	No
MS2.13148.13148.3.0.dta	3092.35	958.557	3	TPLTAJITK	-	2133.77	6-5-0-0-1	6,	3	0.1958	1	0.02807	0.15441	4.06094	0.62706	b7+;Y0+;Y0+;Y1+;	b7+;Y0+;Y1+;	No
MS2.5145.5145.3.0.dta	3198.27	1284.62	3	YKJNSDISSTR	-	1913.68	5-4-1-0-0	3,	1	0.00941	3	0.26526	0.19649	3.19058	0.62693	y4+;y5+;y7+;Y1+;	y5+;y7+;	No
MS2.5145.5145.3.1.dta	3199.29	1284.62	3	YKJNSDISSTR	-	1914.7	5-4-0-0-2	3,	1	0.00941	3	0.26526	0.19649	3.19058	0.62693	y4+;y5+;y7+;Y1+;	y5+;y7+;	No
MS2.6655.6655.3.2.dta	3596.39	1284.6	3	MVSHHJLTTGAT	1,Oxidation[M];	2311.82	8-5-0-0-0	6,	2	0.1393	1	0.12109	0.15656	4.00056	0.62634	y6+;Y0+;Y1+;	y6+;Y0+;Y1+;	No
MS2.27161.27161.3.0.dta	3613.59	1408.82	3	LVPVPITJATLDR	-	2204.77	5-4-2-0-0	8,	6	0.1404	5	0.06476	0.19673	3.15914	0.62149	b3+;y1+;y4+;y5+;y9+;Y0+;Y0+;Y1+;Y1+;Y2+;Y3+;	y1+;Y1+;	Yes	1	1	1
MS2.27161.27161.3.1.dta	3614.6	1408.82	3	LVPVPITJATLDR	-	2205.79	5-4-1-0-2	8,	6	0.1404	5	0.06476	0.19673	3.15914	0.62149	b3+;y1+;y4+;y5+;y9+;Y0+;Y0+;Y1+;Y1+;Y2+;Y3+;	y1+;Y1+;	No
MS2.28276.28276.4.2.dta	4544.85	2339.08	4	GLTFQQJASSMCVPDQDTAIR	12,Carbamidomethyl[C];	2205.79	5-4-1-0-2	7,	0	0	4	0.17115	0.16142	3.83944	0.61975	y1+;y4+;y6+;y8+;	y1+;y6+;y8+;	No
MS2.28276.28276.4.1.dta	4543.86	2339.08	4	GLTFQQJASSMCVPDQDTAIR	12,Carbamidomethyl[C];	2204.77	5-4-2-0-0	7,	0	0	4	0.17115	0.16142	3.83944	0.61975	y1+;y4+;y6+;y8+;	y1+;y6+;y8+;	No
MS2.4187.4187.3.1.dta	2680.06	993.46	3	JNSDISSTR	-	1686.59	7-2-0-0-1	1,	4	0.07874	3	0.11532	0.1921	3.22517	0.61955	y1+;y4+;y5+;Y0+;Y1+;Y1+;Y2+;	y5+;Y1+;	No
MS2.33420.33420.4.1.dta	4901.19	2679.39	4	MVSHHJLTTGATLINEQWLLTTAK	-	2221.79	6-4-1-0-1	6,	2	0.06055	5	0.16338	0.16046	3.85904	0.61923	y2+;y3+;y4+;y5+;y7+;Y0++;Y1++;	y4+;y5+;Y1++;	No
MS2.13178.13178.3.0.dta	2764.12	1157.52	3	EEQFJSTFR	-	1606.59	4-4-0-0-1	5,	3	0.26278	1	0.01931	0.15236	4.06094	0.61874	y1+;Y0+;Y1+;Y2+;	Y0+;Y1+;Y2+;	Yes	3	1	1
MS2.33170.33170.5.0.dta	5253.35	3541.72	5	SLGNVJFTVSAEALESQELCGTEVPSVPEHGRK	20,Carbamidomethyl[C];	1711.62	5-3-0-0-2	6,	1	0.00915	6	0.17944	0.1516	4.07124	0.61722	b2+;b5+;b7+;y4+;y6+;y9+;Y0++;	y4+;y6+;y9+;	No
MS2.35293.35293.4.5.dta	5417.39	3341.61	4	GNVJFTVSAEALESQELCGTEVPSVPEHGRK	18,Carbamidomethyl[C];	2075.73	6-4-1-0-0	4,	0	0	3	0.28357	0.16074	3.83944	0.61716	y4+;y6+;y9+;	y4+;y6+;y9+;	No
MS2.20129.20129.3.0.dta	3503.4	916.456	3	FYFTPJK	-	2586.92	7-5-1-0-1	6,	3	0.11694	3	0.0815	0.18901	3.26366	0.61687	b2+;b3+;y3+;Y0+;Y1+;Y1+;	y3+;Y1+;	No
MS2.30622.30622.4.0.dta	4446.91	2184.08	4	LAGKPTHVJVSVVMAEVDGTC	21,Carbamidomethyl[C];	2262.81	5-5-1-0-1	9,	0	0	5	0.17692	0.13612	4.52186	0.6155	b8+;b12+;y1+;y2+;y5+;	b8+;y1+;y2+;y5+;	No
MS2.30622.30622.4.3.dta	4447.91	2184.08	4	LAGKPTHVJVSVVMAEVDGTC	21,Carbamidomethyl[C];	2263.83	5-5-0-0-3	9,	0	0	5	0.17692	0.13612	4.52186	0.6155	b8+;b12+;y1+;y2+;y5+;	b8+;y1+;y2+;y5+;	No
MS2.28287.28287.4.3.dta	4856.97	1744.89	4	YFTPJKTEDTIFLR	-	3112.09	7-4-3-0-2	5,	3	0.17114	2	0.07421	0.15931	3.85241	0.61371	y5+;y8+;Y1+;Y0++;Y1++;	y5+;Y1+;Y1++;	No
MS2.27853.27853.4.1.dta	4399.86	2339.08	4	GLTFQQJASSMCVPDQDTAIR	12,Carbamidomethyl[C];	2060.76	5-4-0-0-3	7,	0	0	3	0.23643	0.15978	3.83944	0.61348	y5+;y6+;y8+;	y5+;y6+;y8+;	No
MS2.38230.38230.4.1.dta	4792.14	3413.63	4	SLGNVJFTVSAEALESQELCGTEVPSVPEHGR	20,Carbamidomethyl[C];	1378.48	6-2-0-0-0	6,	0	0	2	0.43911	0.20207	3.03379	0.61304	y5+;y8+;	y5+;y8+;	No
MS2.10840.10840.4.0.dta	4531.8	1920.85	4	QQJASSMCVPDQDTAIR	8,Carbamidomethyl[C];	2610.93	5-6-2-0-0	3,	0	0	3	0.23351	0.15987	3.8331	0.61278	y4+;y6+;y8+;	y4+;y6+;y8+;	No
MS2.10840.10840.4.3.dta	4532.8	1920.85	4	QQJASSMCVPDQDTAIR	8,Carbamidomethyl[C];	2611.95	5-6-1-0-2	3,	0	0	3	0.23351	0.15987	3.8331	0.61278	y4+;y6+;y8+;	y4+;y6+;y8+;	No
MS2.4596.4596.3.0.dta	3418.42	1284.62	3	YKJNSDISSTR	-	2133.77	6-5-0-0-1	3,	3	0.08348	4	0.11134	0.19148	3.19058	0.61094	y1+;y4+;y5+;y7+;Y0+;Y1+;Y2+;	y5+;Y1+;	No
MS2.3337.3337.3.2.dta	3368.27	796.347	3	NEEYJK	-	2571.95	6-5-0-0-4	5,	2	0.17714	1	0.03967	0.14779	4.13193	0.61068	b3+;Y0+;Y1+;	b3+;Y0+;Y1+;	No
MS2.3337.3337.3.1.dta	3366.25	796.347	3	NEEYJK	-	2569.9	6-5-2-0-0	5,	2	0.17714	1	0.03967	0.14779	4.13193	0.61068	b3+;Y0+;Y1+;	b3+;Y0+;Y1+;	Yes	3	1	1
MS2.3337.3337.3.0.dta	3367.26	796.347	3	NEEYJK	-	2570.93	6-5-1-0-2	5,	2	0.17714	1	0.03967	0.14779	4.13193	0.61068	b3+;Y0+;Y1+;	b3+;Y0+;Y1+;	No
MS2.27081.27081.3.1.dta	3995.76	1408.82	3	LVPVPITJATLDR	-	2586.92	7-5-1-0-1	8,	5	0.12738	6	0.05964	0.1932	3.15914	0.61035	b3+;y1+;y4+;y5+;y9+;y11+;Y0+;Y0+;Y1+;Y1+;Y2+;	y1+;Y1+;	Yes	1	1	1
MS2.5520.5520.3.2.dta	3638.46	993.46	3	JNSDISSTR	-	2644.96	7-6-0-0-2	1,	0	0	4	0.22001	0.18913	3.22517	0.60996	y4+;y5+;y6+;y7+;	y5+;y7+;	No
MS2.32796.32796.4.2.dta	4991.12	1891.96	4	FYFTPJKTEDTIFLR	-	3099.13	8-6-0-0-4	6,	5	0.03764	8	0.12609	0.19943	3.05561	0.60939	b2+;b3+;b4+;y3+;y5+;y6+;y7+;y8+;Y0+;Y0++;Y0++;Y1++;Y2++;	b2+;y5+;	No
MS2.32796.32796.4.0.dta	4990.11	1891.96	4	FYFTPJKTEDTIFLR	-	3098.11	8-6-1-0-2	6,	5	0.03764	8	0.12609	0.19943	3.05561	0.60939	b2+;b3+;b4+;y3+;y5+;y6+;y7+;y8+;Y0+;Y0++;Y0++;Y1++;Y2++;	b2+;y5+;	No
MS2.9395.9395.3.0.dta	3850.5	769.388	3	YFTPJK	-	3081.09	7-6-2-0-1	5,	2	0.1223	1	0.04742	0.14707	4.13193	0.6077	y3+;Y0+;Y1+;	y3+;Y0+;Y1+;	No
MS2.28835.28835.4.1.dta	4155.8	2184.08	4	LAGKPTHVJVSVVMAEVDGTC	21,Carbamidomethyl[C];	1971.72	5-5-0-0-1	9,	0	0	5	0.27938	0.15893	3.82069	0.60722	y1+;y2+;y3+;y4+;y5+;	y1+;y2+;y5+;	No
MS2.28166.28166.4.5.dta	4388.81	1581.83	4	FTPJKTEDTIFLR	-	2807.01	8-6-0-0-2	4,	0	0	8	0.1683	0.19161	3.15914	0.60533	b1+;y1+;y3+;y4+;y5+;y6+;y8+;y9+;	y1+;y5+;	No
MS2.7530.7530.3.0.dta	3182.38	1122.63	3	LAGKPTHVJVS	-	2059.73	5-4-1-0-1	9,	2	0.15173	2	0.07008	0.15622	3.87262	0.60499	b8+;y7+;Y0+;Y1+;	b8+;Y0+;Y1+;	No
MS2.33493.33493.3.1.dta	4424.01	1780.02	3	LVPVPITJATLDQITGK	-	2643.94	7-6-1-0-0	8,	0	0	11	0.13226	0.19305	3.1303	0.60431	y3+;y4+;y5+;y6+;y7+;y8+;y9+;y10+;y11+;y13+;y15+;	y3+;y8+;	No
MS2.25852.25852.4.1.dta	3674.59	2052	4	MVSHHJLTTGATLINEQW	-	1622.58	5-4-0-0-0	6,	2	0.01028	9	0.11443	0.1573	3.83944	0.60394	b4+;b5+;b6+;b7+;b11+;b14+;y2+;y4+;y5+;Y0++;Y1++;	b5+;b7+;y2+;	No
MS2.28242.28242.3.0.dta	4543.85	2339.08	3	GLTFQQJASSMCVPDQDTAIR	12,Carbamidomethyl[C];	2204.77	5-4-2-0-0	7,	0	0	4	0.16152	0.15729	3.83944	0.6039	y1+;y4+;y6+;y8+;	y1+;y4+;y8+;	No
MS2.28242.28242.3.1.dta	4544.87	2339.08	3	GLTFQQJASSMCVPDQDTAIR	12,Carbamidomethyl[C];	2205.79	5-4-1-0-2	7,	0	0	4	0.16152	0.15729	3.83944	0.6039	y1+;y4+;y6+;y8+;	y1+;y4+;y8+;	No
MS2.30698.30698.4.0.dta	4650.11	2695.39	4	MVSHHJLTTGATLINEQWLLTTAK	1,Oxidation[M];	1954.7	4-5-1-0-0	6,	0	0	7	0.22286	0.15638	3.85904	0.60349	y2+;y3+;y4+;y5+;y6+;y7+;y10+;	y4+;y5+;y6+;	No
MS2.18339.18339.3.1.dta	3196.28	916.456	3	FYFTPJK	-	2279.83	6-5-0-0-2	6,	2	0.12735	2	0.11295	0.18479	3.26366	0.60311	b2+;y3+;Y1+;Y1+;	y3+;Y1+;	No
MS2.18339.18339.3.0.dta	3195.27	916.456	3	FYFTPJK	-	2278.81	6-5-1-0-0	6,	2	0.12735	2	0.11295	0.18479	3.26366	0.60311	b2+;y3+;Y1+;Y1+;	y3+;Y1+;	No
MS2.28315.28315.4.4.dta	4913.92	1920.85	4	QQJASSMCVPDQDTAIR	8,Carbamidomethyl[C];	2993.08	7-7-1-0-1	3,	0	0	4	0.20613	0.15733	3.8331	0.60308	y1+;y4+;y6+;y8+;	y4+;y6+;y8+;	No
MS2.37714.37714.4.1.dta	5141.26	3413.63	4	SLGNVJFTVSAEALESQELCGTEVPSVPEHGR	20,Carbamidomethyl[C];	1727.61	6-3-0-0-1	6,	0	0	6	0.26748	0.18051	3.32944	0.60099	y2+;y3+;y5+;y8+;y10+;y11+;	y5+;y8+;	No
MS2.23860.23860.4.1.dta	4601.91	2339.08	4	GLTFQQJASSMCVPDQDTAIR	12,Carbamidomethyl[C];	2262.81	5-5-1-0-1	7,	0	0	6	0.13983	0.1562	3.83944	0.59971	y1+;y2+;y3+;y4+;y6+;y8+;	y1+;y6+;y8+;	No
MS2.23860.23860.4.3.dta	4602.91	2339.08	4	GLTFQQJASSMCVPDQDTAIR	12,Carbamidomethyl[C];	2263.83	5-5-0-0-3	7,	0	0	6	0.13983	0.1562	3.83944	0.59971	y1+;y2+;y3+;y4+;y6+;y8+;	y1+;y6+;y8+;	No
MS2.26214.26214.4.2.dta	4551.92	1744.89	4	YFTPJKTEDTIFLR	-	2807.01	8-6-0-0-2	5,	3	0.18654	2	0.0732	0.15563	3.85241	0.59955	y1+;y5+;Y1+;Y0++;Y1++;	y5+;Y1+;Y1++;	No
MS2.26214.26214.4.0.dta	4550.92	1744.89	4	YFTPJKTEDTIFLR	-	2805.99	8-6-1-0-0	5,	3	0.18654	2	0.0732	0.15563	3.85241	0.59955	y1+;y5+;Y1+;Y0++;Y1++;	y5+;Y1+;Y1++;	No
MS2.35293.35293.4.1.dta	5414.35	3541.72	4	SLGNVJFTVSAEALESQELCGTEVPSVPEHGRK	20,Carbamidomethyl[C];	1872.65	6-3-1-0-0	6,	0	0	3	0.28357	0.1561	3.83944	0.59936	y4+;y6+;y9+;	y4+;y6+;y9+;	No
MS2.35293.35293.4.2.dta	5415.37	3541.72	4	SLGNVJFTVSAEALESQELCGTEVPSVPEHGRK	20,Carbamidomethyl[C];	1873.67	6-3-0-0-2	6,	0	0	3	0.28357	0.1561	3.83944	0.59936	y4+;y6+;y9+;	y4+;y6+;y9+;	No
MS2.17281.17281.3.0.dta	3344.36	1284.62	3	YKJNSDISSTR	-	2059.73	5-4-1-0-1	3,	3	0.14697	1	0.06721	0.1491	4.01971	0.59933	y5+;Y0+;Y0+;Y1+;	y5+;Y0+;Y1+;	No
MS2.17281.17281.3.1.dta	3345.37	1284.62	3	YKJNSDISSTR	-	2060.76	5-4-0-0-3	3,	3	0.14697	1	0.06721	0.1491	4.01971	0.59933	y5+;Y0+;Y0+;Y1+;	y5+;Y0+;Y1+;	No
MS2.4818.4818.3.3.dta	3448.36	1284.62	3	YKJNSDISSTR	-	2163.75	6-3-2-0-0	3,	2	0.05108	2	0.14142	0.1489	4.01971	0.59855	y1+;y5+;Y1+;Y2+;	y1+;y5+;Y1+;	No
MS2.23599.23599.3.0.dta	3962.67	2381.1	3	STGKPTLYJVSLVMSDTAGTCY	14,Oxidation[M];21,Carbamidomethyl[C];	1581.56	6-3-0-0-0	9,	0	0	13	0.23984	0.1975	3.02854	0.59813	b4+;b5+;b7+;b8+;b9+;b10+;b11+;b13+;y1+;y2+;y3+;y4+;y5+;	b10+;y2+;	No
MS2.39253.39253.4.0.dta	4792.12	3413.63	4	SLGNVJFTVSAEALESQELCGTEVPSVPEHGR	20,Carbamidomethyl[C];	1378.48	6-2-0-0-0	6,	0	0	3	0.27275	0.15544	3.8331	0.59581	y3+;y5+;y8+;	y3+;y5+;y8+;	No
MS2.3336.3336.3.0.dta	2930.13	796.347	3	NEEYJK	-	2133.77	6-5-0-0-1	5,	2	0.18962	1	0.02506	0.14418	4.13193	0.59574	b3+;Y0+;Y1+;	b3+;Y0+;Y1+;	No
MS2.17022.17022.3.1.dta	3345.37	1284.62	3	YKJNSDISSTR	-	2060.76	5-4-0-0-3	3,	2	0.15757	1	0.0817	0.14818	4.01971	0.59565	y5+;Y0+;Y1+;	y5+;Y0+;Y1+;	No
MS2.17022.17022.3.0.dta	3344.37	1284.62	3	YKJNSDISSTR	-	2059.73	5-4-1-0-1	3,	2	0.15757	1	0.0817	0.14818	4.01971	0.59565	y5+;Y0+;Y1+;	y5+;Y0+;Y1+;	No
MS2.31576.31576.5.0.dta	4941.22	2695.39	5	MVSHHJLTTGATLINEQWLLTTAK	1,Oxidation[M];	2245.8	4-5-2-0-0	6,	0	0	15	0.15935	0.19491	3.05561	0.59557	y1+;y2+;y3+;y4+;y5+;y7+;y8+;y9+;y10+;y11+;y12+;y13+;y15+;y16+;y17+;	y4+;y5+;	No
MS2.30404.30404.4.3.dta	4732.06	1795.01	4	VVLHPJYSQVDIGLIK	-	2937.08	7-6-0-0-4	6,	3	0.05841	5	0.09251	0.15464	3.84588	0.59474	b4+;y1+;y5+;y6+;y12+;Y1+;Y1++;Y2++;	b4+;y5+;Y1+;	No
MS2.30404.30404.4.1.dta	4731.07	1795.01	4	VVLHPJYSQVDIGLIK	-	2936.06	7-6-1-0-2	6,	3	0.05841	5	0.09251	0.15464	3.84588	0.59474	b4+;y1+;y5+;y6+;y12+;Y1+;Y1++;Y2++;	b4+;y5+;Y1+;	No
MS2.26946.26946.3.0.dta	3658.58	1744.89	3	YFTPJKTEDTIFLR	-	1913.68	5-4-1-0-0	5,	1	0.0344	4	0.16523	0.15413	3.85241	0.59377	b2+;y1+;y5+;y8+;Y1+;	y5+;y8+;Y1+;	No
MS2.26946.26946.3.1.dta	3659.57	1744.89	3	YFTPJKTEDTIFLR	-	1914.7	5-4-0-0-2	5,	1	0.0344	4	0.16523	0.15413	3.85241	0.59377	b2+;y1+;y5+;y8+;Y1+;	y5+;y8+;Y1+;	No
MS2.23873.23873.4.1.dta	4558.89	1920.85	4	QQJASSMCVPDQDTAIR	8,Carbamidomethyl[C];	2638	3-7-0-0-5	3,	0	0	5	0.25107	0.19554	3.03379	0.59323	y1+;y4+;y6+;y8+;y10+;	y6+;y8+;	No
MS2.27468.27468.5.0.dta	4534.92	2184.08	5	LAGKPTHVJVSVVMAEVDGTC	21,Carbamidomethyl[C];	2350.83	5-4-2-0-1	9,	0	0	6	0.15788	0.13107	4.52186	0.59266	b8+;b12+;y1+;y2+;y4+;y5+;	y1+;y2+;y4+;y5+;	No
MS2.23824.23824.3.0.dta	4601.9	2339.08	3	GLTFQQJASSMCVPDQDTAIR	12,Carbamidomethyl[C];	2262.81	5-5-1-0-1	7,	0	0	4	0.15966	0.15403	3.83944	0.59137	y1+;y4+;y6+;y8+;	y1+;y4+;y8+;	No
MS2.30899.30899.3.1.dta	4513	1795.01	3	VVLHPJYSQVDIGLIK	-	2717.98	8-7-0-0-0	6,	2	0.02557	7	0.1773	0.19351	3.04454	0.58914	b2+;b4+;y1+;y2+;y4+;y5+;y12+;Y0+;Y5++;	b4+;y5+;	No
MS2.30899.30899.3.0.dta	4511	1795.01	3	VVLHPJYSQVDIGLIK	-	2715.96	6-5-2-0-1	6,	2	0.02557	7	0.1773	0.19351	3.04454	0.58914	b2+;b4+;y1+;y2+;y4+;y5+;y12+;Y0+;Y5++;	b4+;y5+;	No
MS2.32424.32424.4.1.dta	5192.13	1891.96	4	FYFTPJKTEDTIFLR	-	3300.17	8-7-2-0-0	6,	2	0.0527	4	0.13452	0.15242	3.85904	0.58818	b2+;y3+;y5+;y8+;Y0++;Y1++;	b2+;y5+;Y1++;	No
MS2.32424.32424.4.3.dta	5193.16	1891.96	4	FYFTPJKTEDTIFLR	-	3301.19	8-7-1-0-2	6,	2	0.0527	4	0.13452	0.15242	3.85904	0.58818	b2+;y3+;y5+;y8+;Y0++;Y1++;	b2+;y5+;Y1++;	No
MS2.14239.14239.3.0.dta	2926.17	1157.52	3	EEQFJSTFR	-	1768.64	5-4-0-0-1	5,	4	0.1164	2	0.04899	0.1443	4.06094	0.58601	y1+;y4+;Y0+;Y0+;Y1+;Y2+;	y1+;Y0+;Y0+;	Yes	3	1	1
MS2.12952.12952.3.1.dta	3400.47	958.557	3	TPLTAJITK	-	2441.88	7-5-0-0-2	6,	3	0.15344	1	0.03475	0.14286	4.06094	0.58015	b7+;Y0+;Y0+;Y1+;	b7+;Y0+;Y1+;	No
MS2.25210.25210.3.0.dta	3833.7	1408.82	3	LVPVPITJATLDR	-	2424.87	6-5-1-0-1	8,	5	0.15696	4	0.05931	0.1833	3.15914	0.57907	b3+;y1+;y5+;y9+;Y0+;Y1+;Y1+;Y2+;Y3+;	y1+;Y1+;	Yes	1	1	1
MS2.25210.25210.3.1.dta	3834.7	1408.82	3	LVPVPITJATLDR	-	2425.89	6-5-0-0-3	8,	5	0.15696	4	0.05931	0.1833	3.15914	0.57907	b3+;y1+;y5+;y9+;Y0+;Y1+;Y1+;Y2+;Y3+;	y1+;Y1+;	No
MS2.25741.25741.3.1.dta	3306.46	1740.89	3	FSIJTTNVMGTSLTVR	-	1565.56	5-3-0-0-1	4,	1	0.03815	5	0.14501	0.14612	3.95624	0.57807	y1+;y3+;y7+;y8+;y10+;Y1+;	y7+;y8+;Y1+;	No
MS2.5234.5234.3.0.dta	3256.35	1284.62	3	YKJNSDISSTR	-	1971.72	5-5-0-0-1	3,	0	0	3	0.24868	0.18085	3.19058	0.57701	y4+;y5+;y7+;	y5+;y7+;	No
MS2.3633.3633.2.0.dta	2987.12	796.347	2	NEEYJK	-	2190.79	6-6-0-0-0	5,	2	0.08706	2	0.05964	0.13955	4.13193	0.5766	b2+;b3+;Y0+;Y1+;	b3+;Y0+;Y1+;	No
MS2.5056.5056.3.0.dta	3157.24	1284.62	3	YKJNSDISSTR	-	1872.65	6-3-1-0-0	3,	2	0.02869	3	0.18639	0.18069	3.19058	0.57652	y4+;y5+;y7+;Y1+;Y1+;	y5+;y7+;	No
MS2.5056.5056.3.1.dta	3158.27	1284.62	3	YKJNSDISSTR	-	1873.67	6-3-0-0-2	3,	2	0.02869	3	0.18639	0.18069	3.19058	0.57652	y4+;y5+;y7+;Y1+;Y1+;	y5+;y7+;	No
MS2.36049.36049.4.1.dta	4979.21	3413.63	4	SLGNVJFTVSAEALESQELCGTEVPSVPEHGR	20,Carbamidomethyl[C];	1565.56	5-3-0-0-1	6,	0	0	9	0.22954	0.1897	3.03379	0.57551	b2+;b4+;y3+;y5+;y6+;y8+;y9+;y12+;y14+;	y5+;y8+;	No
MS2.38625.38625.4.1.dta	4758.17	3541.72	4	SLGNVJFTVSAEALESQELCGTEVPSVPEHGRK	20,Carbamidomethyl[C];	1216.42	5-2-0-0-0	6,	0	0	2	0.40936	0.18915	3.03913	0.57484	y6+;y9+;	y6+;y9+;	No
MS2.27006.27006.3.0.dta	3978.73	1408.82	3	LVPVPITJATLDR	-	2569.9	6-5-2-0-0	8,	5	0.13443	5	0.05204	0.18103	3.15914	0.57191	b3+;y1+;y4+;y5+;y11+;Y0+;Y0+;Y1+;Y2+;Y3+;	y1+;Y1+;	Yes	1	1	1
MS2.23262.23262.3.2.dta	3755.49	1183.54	3	GLTFQQJASSM	-	2571.95	6-5-0-0-4	7,	2	0.04413	7	0.09237	0.17902	3.19058	0.57119	b6+;b7+;b8+;y3+;y6+;y7+;y8+;Y0+;Y0+;	b8+;Y0+;	No
MS2.23262.23262.3.1.dta	3754.49	1183.54	3	GLTFQQJASSM	-	2570.93	6-5-1-0-2	7,	2	0.04413	7	0.09237	0.17902	3.19058	0.57119	b6+;b7+;b8+;y3+;y6+;y7+;y8+;Y0+;Y0+;	b8+;Y0+;	Yes	2	1	1
MS2.4546.4546.4.3.dta	3149.24	1284.62	4	YKJNSDISSTR	-	1864.63	9-2-0-0-0	3,	1	0.01261	5	0.15566	0.1788	3.19058	0.57049	y1+;y4+;y5+;y8+;y9+;Y1+;	y4+;y5+;	No
MS2.27475.27475.5.0.dta	4737.99	2184.08	5	LAGKPTHVJVSVVMAEVDGTC	21,Carbamidomethyl[C];	2553.91	5-5-2-0-1	9,	0	0	5	0.17501	0.12614	4.52186	0.57038	b8+;y1+;y2+;y4+;y5+;	y1+;y2+;y4+;y5+;	No
MS2.28990.28990.4.1.dta	4033.75	1753.93	4	CANLVPVPITJATLDR	1,Carbamidomethyl[C];	2279.83	6-5-0-0-2	11,	1	0.04035	3	0.14808	0.12176	4.67479	0.5692	b2+;b3+;b4+;Y1+;	b2+;b3+;b4+;Y1+;	No
MS2.2502.2502.3.1.dta	3002.15	796.347	3	NEEYJK	-	2205.79	5-4-1-0-2	5,	2	0.15935	2	0.07379	0.17238	3.2847	0.56622	b2+;b3+;Y0+;Y0+;	b2+;Y0+;	No
MS2.2502.2502.3.0.dta	3001.13	796.347	3	NEEYJK	-	2204.77	5-4-2-0-0	5,	2	0.15935	2	0.07379	0.17238	3.2847	0.56622	b2+;b3+;Y0+;Y0+;	b2+;Y0+;	Yes	3	1	1
MS2.33187.33187.5.0.dta	5294.38	3541.72	5	SLGNVJFTVSAEALESQELCGTEVPSVPEHGRK	20,Carbamidomethyl[C];	1752.64	4-4-0-0-2	6,	0	0	5	0.20787	0.14551	3.87661	0.5641	b2+;b5+;y4+;y6+;y9+;	y4+;y6+;y9+;	No
MS2.5344.5344.3.0.dta	3303.34	1284.62	3	YKJNSDISSTR	-	2018.71	6-3-1-0-1	3,	1	0.01093	4	0.18392	0.17679	3.19058	0.56405	y1+;y4+;y5+;y7+;Y1+;	y5+;y7+;	No
MS2.5344.5344.3.1.dta	3304.32	1284.62	3	YKJNSDISSTR	-	2019.73	6-3-0-0-3	3,	1	0.01093	4	0.18392	0.17679	3.19058	0.56405	y1+;y4+;y5+;y7+;Y1+;	y5+;y7+;	No
MS2.27124.27124.3.0.dta	3524.53	1593.83	3	SIJTTNVMGTSLTVR	-	1930.69	6-4-0-0-1	3,	3	0.12998	5	0.0925	0.1798	3.1303	0.56283	y1+;y5+;y7+;y8+;y10+;Y0+;Y1+;Y1+;	y1+;Y1+;	No
MS2.6431.6431.3.0.dta	3547.44	1284.62	3	YKJNSDISSTR	-	2262.81	5-5-1-0-1	3,	2	0.12678	2	0.12062	0.17615	3.19058	0.56201	y5+;y7+;Y0+;Y1+;	y5+;Y1+;	Yes	3	1	1
MS2.15188.15188.3.0.dta	3344.37	1284.62	3	YKJNSDISSTR	-	2059.73	5-4-1-0-1	3,	2	0.15088	1	0.06644	0.13949	4.01971	0.56073	y5+;Y0+;Y1+;	y5+;Y0+;Y1+;	No
MS2.15188.15188.3.1.dta	3345.36	1284.62	3	YKJNSDISSTR	-	2060.76	5-4-0-0-3	3,	2	0.15088	1	0.06644	0.13949	4.01971	0.56073	y5+;Y0+;Y1+;	y5+;Y0+;Y1+;	No
MS2.9020.9020.3.0.dta	3344.37	1284.62	3	YKJNSDISSTR	-	2059.73	5-4-1-0-1	3,	3	0.1311	2	0.09913	0.17535	3.19058	0.55947	y5+;y9+;Y0+;Y0+;Y1+;	y5+;Y1+;	Yes	3	1	1
MS2.9020.9020.3.1.dta	3345.37	1284.62	3	YKJNSDISSTR	-	2060.76	5-4-0-0-3	3,	3	0.1311	2	0.09913	0.17535	3.19058	0.55947	y5+;y9+;Y0+;Y0+;Y1+;	y5+;Y1+;	No
MS2.6653.6653.3.0.dta	3547.45	1284.62	3	YKJNSDISSTR	-	2262.81	5-5-1-0-1	3,	2	0.12546	1	0.08645	0.1391	4.01971	0.55912	y5+;Y0+;Y1+;	y5+;Y0+;Y1+;	Yes	3	1	1
MS2.33381.33381.4.1.dta	4884.19	2679.39	4	MVSHHJLTTGATLINEQWLLTTAK	-	2204.77	5-4-2-0-0	6,	0	0	10	0.20797	0.1829	3.05561	0.55886	b4+;b5+;b6+;b11+;y2+;y3+;y4+;y5+;y6+;y7+;	y4+;y5+;	Yes	2	1	1
MS2.33381.33381.4.0.dta	4885.2	2679.39	4	MVSHHJLTTGATLINEQWLLTTAK	-	2205.79	5-4-1-0-2	6,	0	0	10	0.20797	0.1829	3.05561	0.55886	b4+;b5+;b6+;b11+;y2+;y3+;y4+;y5+;y6+;y7+;	y4+;y5+;	Yes	2	1	1
MS2.13323.13323.3.1.dta	2967.2	1157.52	3	EEQFJSTFR	-	1809.67	4-5-0-0-1	5,	2	0.23673	1	0.02872	0.13761	4.06094	0.55883	y1+;Y1+;Y2+;	y1+;Y1+;Y2+;	Yes	3	1	1
MS2.6432.6432.3.1.dta	3010.21	1096.52	3	MVSHHJLTTG	-	1913.68	5-4-1-0-0	6,	2	0.2225	1	0.03787	0.13811	4.0398	0.55795	b6+;Y0+;Y1+;	b6+;Y0+;Y1+;	No
MS2.6432.6432.3.2.dta	3011.21	1096.52	3	MVSHHJLTTG	-	1914.7	5-4-0-0-2	6,	2	0.2225	1	0.03787	0.13811	4.0398	0.55795	b6+;Y0+;Y1+;	b6+;Y0+;Y1+;	No
MS2.36698.36698.4.0.dta	5252.34	3541.72	4	SLGNVJFTVSAEALESQELCGTEVPSVPEHGRK	20,Carbamidomethyl[C];	1710.6	5-3-1-0-0	6,	0	0	4	0.33326	0.18351	3.03913	0.5577	b2+;b4+;y6+;y9+;	y6+;y9+;	No
MS2.37497.37497.5.1.dta	5455.38	3541.72	5	SLGNVJFTVSAEALESQELCGTEVPSVPEHGRK	20,Carbamidomethyl[C];	1913.68	5-4-1-0-0	6,	0	0	3	0.25191	0.14482	3.83944	0.55605	y4+;y6+;y9+;	y4+;y6+;y9+;	No
MS2.28402.28402.3.1.dta	4477.89	1744.89	3	YFTPJKTEDTIFLR	-	2732.98	7-5-1-0-2	5,	3	0.06173	6	0.1269	0.18225	3.05003	0.55588	b2+;y1+;y4+;y5+;y7+;y8+;Y1+;Y0++;Y1++;	y5+;Y1+;	Yes	1	1	1
MS2.32503.32503.4.2.dta	4609.1	2695.39	4	MVSHHJLTTGATLINEQWLLTTAK	1,Oxidation[M];	1913.68	5-4-1-0-0	6,	0	0	7	0.14844	0.12096	4.56511	0.55221	y2+;y3+;y4+;y5+;y6+;y7+;y9+;	y3+;y4+;y5+;y7+;	No
MS2.28241.28241.3.0.dta	4696.95	1744.89	3	YFTPJKTEDTIFLR	-	2952.05	8-6-1-0-1	5,	3	0.10348	4	0.13368	0.181	3.05003	0.55205	y1+;y3+;y5+;y8+;Y1+;Y0++;Y1++;	y5+;Y1+;	Yes	3	1	1
MS2.3164.3164.3.1.dta	2727.06	796.347	3	NEEYJK	-	1930.69	6-4-0-0-1	5,	2	0.08036	4	0.05172	0.16774	3.2847	0.55099	b2+;b3+;b4+;y2+;Y0+;Y1+;	Y0+;Y1+;	Yes	1	1	1
MS2.4768.4768.3.0.dta	3313.36	1284.62	3	YKJNSDISSTR	-	2028.74	5-6-0-0-0	3,	2	0.05623	3	0.15836	0.17214	3.19058	0.54922	y1+;y4+;y5+;Y1+;Y2+;	y5+;Y2+;	No
MS2.37213.37213.5.0.dta	5166.27	3413.63	5	SLGNVJFTVSAEALESQELCGTEVPSVPEHGR	20,Carbamidomethyl[C];	1752.64	4-4-0-0-2	6,	0	0	2	0.37848	0.18063	3.03379	0.548	y5+;y8+;	y5+;y8+;	No
MS2.11713.11713.3.1.dta	3301.31	1183.54	3	GLTFQQJASSM	-	2117.78	5-5-0-0-2	7,	0	0	8	0.14529	0.17159	3.19058	0.54748	b3+;b4+;b5+;b6+;b7+;b8+;b9+;y1+;	b8+;b9+;	No
MS2.11713.11713.3.0.dta	3300.31	1183.54	3	GLTFQQJASSM	-	2116.76	5-5-1-0-0	7,	0	0	8	0.14529	0.17159	3.19058	0.54748	b3+;b4+;b5+;b6+;b7+;b8+;b9+;y1+;	b8+;b9+;	No
MS2.23873.23873.4.2.dta	4559.86	2355.07	4	GLTFQQJASSMCVPDQDTAIR	11,Oxidation[M];12,Carbamidomethyl[C];	2204.77	5-4-2-0-0	7,	0	0	5	0.25107	0.17933	3.04454	0.54597	y1+;y4+;y6+;y8+;y10+;	y6+;y8+;	No
MS2.15435.15435.4.1.dta	4455.84	2339.08	4	GLTFQQJASSMCVPDQDTAIR	12,Carbamidomethyl[C];	2116.76	5-5-1-0-0	7,	0	0	4	0.21328	0.17955	3.03913	0.54566	y1+;y4+;y6+;y8+;	y4+;y8+;	No
MS2.9110.9110.3.0.dta	2979.23	1284.62	3	YKJNSDISSTR	-	1694.6	4-3-1-0-1	3,	2	0.2083	1	0.06534	0.14067	3.87262	0.54475	y5+;Y1+;Y1++;	y5+;Y1+;Y1++;	No
MS2.9110.9110.3.2.dta	2980.24	1284.62	3	YKJNSDISSTR	-	1695.62	4-3-0-0-3	3,	2	0.2083	1	0.06534	0.14067	3.87262	0.54475	y5+;Y1+;Y1++;	y5+;Y1+;Y1++;	No
MS2.10839.10839.3.0.dta	3344.37	1284.62	3	YKJNSDISSTR	-	2059.73	5-4-1-0-1	3,	2	0.13225	2	0.10372	0.1705	3.19058	0.544	y5+;y7+;Y0+;Y1+;	y5+;Y1+;	No
MS2.10839.10839.3.1.dta	3345.37	1284.62	3	YKJNSDISSTR	-	2060.76	5-4-0-0-3	3,	2	0.13225	2	0.10372	0.1705	3.19058	0.544	y5+;y7+;Y0+;Y1+;	y5+;Y1+;	No
MS2.32847.32847.4.1.dta	3693.72	1780.02	4	LVPVPITJATLDQITGK	-	1913.68	5-4-1-0-0	8,	1	0.01721	6	0.17991	0.17315	3.1303	0.542	b2+;b3+;y3+;y8+;y13+;y15+;Y1+;	b2+;y13+;	No
MS2.32847.32847.4.3.dta	3694.72	1780.02	4	LVPVPITJATLDQITGK	-	1914.7	5-4-0-0-2	8,	1	0.01721	6	0.17991	0.17315	3.1303	0.542	b2+;b3+;y3+;y8+;y13+;y15+;Y1+;	b2+;y13+;	No
MS2.23554.23554.3.0.dta	3508.53	1593.83	3	SIJTTNVMGTSLTVR	-	1914.7	5-4-0-0-2	3,	1	0.06755	4	0.10839	0.13718	3.94791	0.54159	y1+;y7+;y8+;y10+;Y1+;	y1+;y8+;Y1+;	No
MS2.31840.31840.3.0.dta	4534.94	1891.96	3	FYFTPJKTEDTIFLR	-	2642.95	5-4-2-0-3	6,	3	0.0418	5	0.15195	0.17708	3.05561	0.54109	b2+;b3+;y5+;y6+;y8+;Y0++;Y0++;Y1++;	b2+;y5+;	No
MS2.31840.31840.3.1.dta	4535.93	1891.96	3	FYFTPJKTEDTIFLR	-	2643.94	7-6-1-0-0	6,	3	0.0418	5	0.15195	0.17708	3.05561	0.54109	b2+;b3+;y5+;y6+;y8+;Y0++;Y0++;Y1++;	b2+;y5+;	No
MS2.4460.4460.3.1.dta	3401.37	1284.62	3	YKJNSDISSTR	-	2116.76	5-5-1-0-0	3,	3	0.143	2	0.0926	0.16954	3.19058	0.54094	y1+;y5+;Y0+;Y1+;Y2+;	y5+;Y1+;	No
MS2.4460.4460.3.2.dta	3402.4	1284.62	3	YKJNSDISSTR	-	2117.78	5-5-0-0-2	3,	3	0.143	2	0.0926	0.16954	3.19058	0.54094	y1+;y5+;Y0+;Y1+;Y2+;	y5+;Y1+;	No
MS2.17429.17429.3.0.dta	4300.85	2184.08	3	LAGKPTHVJVSVVMAEVDGTC	21,Carbamidomethyl[C];	2116.76	5-5-1-0-0	9,	0	0	7	0.17988	0.14089	3.82069	0.53831	b4+;b7+;b10+;y1+;y2+;y4+;y5+;	y1+;y4+;y5+;	No
MS2.17429.17429.3.1.dta	4301.85	2184.08	3	LAGKPTHVJVSVVMAEVDGTC	21,Carbamidomethyl[C];	2117.78	5-5-0-0-2	9,	0	0	7	0.17988	0.14089	3.82069	0.53831	b4+;b7+;b10+;y1+;y2+;y4+;y5+;	y1+;y4+;y5+;	No
MS2.29812.29812.4.0.dta	4971.04	1744.89	4	YFTPJKTEDTIFLR	-	3226.13	7-6-3-0-0	5,	5	0.0648	7	0.07776	0.17641	3.05003	0.53806	b2+;b3+;y3+;y5+;y6+;y8+;y9+;Y0+;Y1+;Y0++;Y0++;Y1++;	y5+;Y1+;	Yes	1	1	1
MS2.32199.32199.4.1.dta	4802.1	1795.01	4	VVLHPJYSQVDIGLIK	-	3007.06	6-5-3-0-1	6,	3	0.09764	4	0.0773	0.13974	3.84588	0.53744	b4+;y2+;y4+;y5+;Y1+;Y1++;Y2++;	b4+;y5+;Y1++;	No
MS2.35592.35592.4.0.dta	5166.27	3413.63	4	SLGNVJFTVSAEALESQELCGTEVPSVPEHGR	20,Carbamidomethyl[C];	1752.64	4-4-0-0-2	6,	0	0	4	0.29341	0.17593	3.03379	0.53375	y3+;y5+;y8+;y9+;	y5+;y8+;	No
MS2.33255.33255.5.0.dta	5414.39	3541.72	5	SLGNVJFTVSAEALESQELCGTEVPSVPEHGRK	20,Carbamidomethyl[C];	1872.65	6-3-1-0-0	6,	0	0	5	0.28427	0.17541	3.03913	0.53309	b2+;y3+;y4+;y6+;y9+;	y6+;y9+;	No
MS2.30490.30490.4.1.dta	3709.68	1795.01	4	VVLHPJYSQVDIGLIK	-	1914.7	5-4-0-0-2	6,	0	0	5	0.17588	0.13821	3.84588	0.53154	b4+;y2+;y3+;y4+;y5+;	b4+;y4+;y5+;	No
MS2.7405.7405.2.0.dta	2650.05	1189.51	2	EEQYJSTYR	-	1460.53	4-4-0-0-0	5,	2	0.25506	2	0.03974	0.1646	3.22517	0.53085	y1+;y4+;Y1+;Y3+;	Y1+;Y3+;	Yes	3	1	1
MS2.16092.16092.3.0.dta	3547.44	1284.62	3	YKJNSDISSTR	-	2262.81	5-5-1-0-1	3,	2	0.16118	1	0.04401	0.13206	4.01971	0.53083	y5+;Y1+;Y2+;	y5+;Y1+;Y2+;	No
MS2.4238.4238.2.1.dta	2705.07	993.46	2	JNSDISSTR	-	1711.62	5-3-0-0-2	1,	3	0.12844	2	0.07079	0.16455	3.22517	0.5307	y1+;y5+;Y0+;Y1+;Y5+;	y5+;Y1+;	No
MS2.4238.4238.2.0.dta	2704.07	993.46	2	JNSDISSTR	-	1710.6	5-3-1-0-0	1,	3	0.12844	2	0.07079	0.16455	3.22517	0.5307	y1+;y5+;Y0+;Y1+;Y5+;	y5+;Y1+;	No
MS2.28166.28166.4.1.dta	4389.85	1891.96	4	FYFTPJKTEDTIFLR	-	2497.91	5-4-1-0-4	6,	0	0	8	0.1683	0.17327	3.05561	0.52944	b1+;y1+;y3+;y4+;y5+;y6+;y8+;y9+;	y1+;y5+;	No
MS2.26178.26178.4.0.dta	4535.9	1744.89	4	YFTPJKTEDTIFLR	-	2791.02	7-6-0-0-3	5,	3	0.08138	5	0.11395	0.17276	3.05003	0.52693	b2+;y1+;y5+;y6+;y8+;Y1+;Y0++;Y1++;	y5+;Y1+;	No
MS2.26178.26178.4.1.dta	4534.91	1744.89	4	YFTPJKTEDTIFLR	-	2790	7-6-1-0-1	5,	3	0.08138	5	0.11395	0.17276	3.05003	0.52693	b2+;y1+;y5+;y6+;y8+;Y1+;Y0++;Y1++;	y5+;Y1+;	No
MS2.3855.3855.2.0.dta	2158.82	796.347	2	NEEYJK	-	1362.48	5-2-0-0-1	5,	2	0.11154	3	0.041	0.16039	3.2847	0.52682	b2+;b3+;y3+;Y0+;Y1+;	Y0+;Y1+;	No
MS2.18468.18468.4.1.dta	4591.96	2184.08	4	LAGKPTHVJVSVVMAEVDGTC	21,Carbamidomethyl[C];	2407.85	5-5-2-0-0	9,	0	0	13	0.09291	0.13787	3.82069	0.52674	b4+;b5+;b6+;b7+;b9+;b12+;b13+;y2+;y3+;y4+;y5+;y6+;y7+;	y2+;y4+;y5+;	No
MS2.7296.7296.2.0.dta	2430.97	1189.51	2	EEQYJSTYR	-	1241.45	3-3-0-0-1	5,	2	0.21039	1	0.0306	0.12931	4.06094	0.5251	y1+;Y1+;Y1+;	y1+;Y1+;Y1+;	No
MS2.31562.31562.4.3.dta	4699.01	1891.96	4	FYFTPJKTEDTIFLR	-	2807.01	8-6-0-0-2	6,	3	0.13223	4	0.10074	0.17136	3.05561	0.5236	b2+;b4+;y5+;y6+;Y0++;Y1++;Y3++;	y5+;Y1++;	No
MS2.31562.31562.4.1.dta	4697.99	1891.96	4	FYFTPJKTEDTIFLR	-	2805.99	8-6-1-0-0	6,	3	0.13223	4	0.10074	0.17136	3.05561	0.5236	b2+;b4+;y5+;y6+;Y0++;Y1++;Y3++;	y5+;Y1++;	No
MS2.23848.23848.3.0.dta	3800.61	2381.1	3	STGKPTLYJVSLVMSDTAGTCY	14,Oxidation[M];21,Carbamidomethyl[C];	1419.5	5-3-0-0-0	9,	0	0	12	0.19732	0.17238	3.02854	0.52205	b4+;b5+;b8+;b9+;b10+;b11+;b12+;b13+;y1+;y2+;y4+;y5+;	y1+;y2+;	No
MS2.32913.32913.4.3.dta	4941.14	2695.39	4	MVSHHJLTTGATLINEQWLLTTAK	1,Oxidation[M];	2245.8	4-5-2-0-0	6,	0	0	10	0.12123	0.13523	3.85904	0.52184	b4+;b13+;y2+;y3+;y4+;y5+;y6+;y7+;y9+;y10+;	y3+;y4+;y5+;	No
MS2.32913.32913.4.0.dta	4942.17	2695.39	4	MVSHHJLTTGATLINEQWLLTTAK	1,Oxidation[M];	2246.82	4-5-1-0-2	6,	0	0	10	0.12123	0.13523	3.85904	0.52184	b4+;b13+;y2+;y3+;y4+;y5+;y6+;y7+;y9+;y10+;	y3+;y4+;y5+;	No
MS2.31463.31463.3.3.dta	4057.82	1795.01	3	VVLHPJYSQVDIGLIK	-	2262.81	5-5-1-0-1	6,	0	0	9	0.14092	0.17094	3.04454	0.52045	y1+;y2+;y3+;y4+;y5+;y6+;y7+;y9+;y12+;	y4+;y5+;	No
MS2.36454.36454.4.0.dta	5414.39	3541.72	4	SLGNVJFTVSAEALESQELCGTEVPSVPEHGRK	20,Carbamidomethyl[C];	1872.65	6-3-1-0-0	6,	0	0	6	0.24805	0.17122	3.03913	0.52036	b4+;y3+;y4+;y6+;y9+;y10+;	y6+;y9+;	No
MS2.30294.30294.3.0.dta	4244.83	1891.96	3	FYFTPJKTEDTIFLR	-	2352.87	5-4-0-0-5	6,	1	0.0275	4	0.21565	0.17028	3.05561	0.52031	b2+;y1+;y5+;y8+;Y0++;	y5+;Y0++;	Yes	3	0	0
MS2.23859.23859.3.0.dta	4124.71	2381.1	3	STGKPTLYJVSLVMSDTAGTCY	14,Oxidation[M];21,Carbamidomethyl[C];	1743.61	7-3-0-0-0	9,	0	0	6	0.22098	0.13576	3.82685	0.51952	b4+;b8+;b10+;y2+;y3+;y5+;	b8+;b10+;y2+;	No
MS2.9100.9100.3.1.dta	3852.51	769.388	3	YFTPJK	-	3083.11	9-8-0-0-0	5,	2	0.07472	1	0.10702	0.15788	3.2847	0.51858	y3+;Y0+;Y1+;	y3+;Y1+;	No
MS2.9100.9100.3.0.dta	3850.5	769.388	3	YFTPJK	-	3081.09	7-6-2-0-1	5,	2	0.07472	1	0.10702	0.15788	3.2847	0.51858	y3+;Y0+;Y1+;	y3+;Y1+;	No
MS2.36799.36799.4.2.dta	5456.41	3541.72	4	SLGNVJFTVSAEALESQELCGTEVPSVPEHGRK	20,Carbamidomethyl[C];	1914.7	5-4-0-0-2	6,	0	0	3	0.3228	0.17004	3.03913	0.51676	y4+;y6+;y9+;	y6+;y9+;	No
MS2.36799.36799.4.0.dta	5455.43	3541.72	4	SLGNVJFTVSAEALESQELCGTEVPSVPEHGRK	20,Carbamidomethyl[C];	1913.68	5-4-1-0-0	6,	0	0	3	0.3228	0.17004	3.03913	0.51676	y4+;y6+;y9+;	y6+;y9+;	No
MS2.10614.10614.3.0.dta	3344.37	1284.62	3	YKJNSDISSTR	-	2059.73	5-4-1-0-1	3,	3	0.1641	1	0.0822	0.16143	3.19058	0.51507	y5+;Y0+;Y0+;Y1+;	y5+;Y1+;	No
MS2.10614.10614.3.1.dta	3345.36	1284.62	3	YKJNSDISSTR	-	2060.76	5-4-0-0-3	3,	3	0.1641	1	0.0822	0.16143	3.19058	0.51507	y5+;Y0+;Y0+;Y1+;	y5+;Y1+;	No
MS2.16290.16290.3.1.dta	3464.55	1451.8	3	LAGKPTHVJVSVVM	-	2012.75	4-6-0-0-1	9,	0	0	7	0.15701	0.1634	3.14442	0.51379	b7+;b8+;b9+;b10+;b12+;y4+;y6+;	b7+;b8+;	No
MS2.34561.34561.3.0.dta	4630.05	3413.63	3	SLGNVJFTVSAEALESQELCGTEVPSVPEHGR	20,Carbamidomethyl[C];	1216.42	5-2-0-0-0	6,	0	0	5	0.21464	0.14646	3.50535	0.51338	y1+;y2+;y3+;y5+;y8+;	y5+;y8+;	No
MS2.17366.17366.3.0.dta	4503.93	2184.08	3	LAGKPTHVJVSVVMAEVDGTC	21,Carbamidomethyl[C];	2319.84	5-6-1-0-0	9,	0	0	6	0.17418	0.13413	3.82069	0.51247	b7+;b8+;y1+;y2+;y4+;y5+;	y1+;y4+;y5+;	No
MS2.31097.31097.4.1.dta	4748.1	1795.01	4	VVLHPJYSQVDIGLIK	-	2953.07	8-6-0-0-3	6,	4	0.1179	4	0.10846	0.16737	3.04454	0.50957	b4+;y2+;y4+;y5+;Y1+;Y1++;Y2++;Y3++;	b4+;Y1++;	Yes	3	1	1
MS2.17465.17465.4.1.dta	4503.93	2184.08	4	LAGKPTHVJVSVVMAEVDGTC	21,Carbamidomethyl[C];	2319.84	5-6-1-0-0	9,	0	0	7	0.16541	0.13335	3.82069	0.50949	b4+;b7+;b10+;y1+;y2+;y4+;y5+;	y1+;y4+;y5+;	No
MS2.12333.12333.3.0.dta	5034.97	1555.71	3	THTJISESHPJATF	-	3479.24	10-7-1-0-1	4,	4	0.12048	4	0.09763	0.16752	3.03379	0.50822	b2+;b3+;y5+;y9+;Y1+;Y2+;Y1++;Y2++;	b2+;Y2++;	No
MS2.8723.8723.3.1.dta	3547.44	1284.6	3	MVSHHJLTTGAT	1,Oxidation[M];	2262.81	5-5-1-0-1	6,	1	0.12721	2	0.13665	0.16003	3.1745	0.50801	b1+;y6+;Y1+;	y6+;Y1+;	No
MS2.25384.25384.4.1.dta	4617.89	2339.08	4	GLTFQQJASSMCVPDQDTAIR	12,Carbamidomethyl[C];	2278.81	6-5-1-0-0	7,	0	0	3	0.23506	0.16694	3.03913	0.50736	y1+;y4+;y8+;	y4+;y8+;	No
MS2.37691.37691.5.0.dta	5165.23	3413.63	5	SLGNVJFTVSAEALESQELCGTEVPSVPEHGR	20,Carbamidomethyl[C];	1751.62	4-4-1-0-0	6,	0	0	2	0.3419	0.16721	3.03379	0.50729	y5+;y8+;	y5+;y8+;	No
MS2.38493.38493.4.1.dta	4792.12	3413.63	4	SLGNVJFTVSAEALESQELCGTEVPSVPEHGR	20,Carbamidomethyl[C];	1378.48	6-2-0-0-0	6,	0	0	2	0.33768	0.16714	3.03379	0.50708	y5+;y8+;	y5+;y8+;	No
MS2.27662.27662.3.1.dta	4551.93	2184.08	3	LAGKPTHVJVSVVMAEVDGTC	21,Carbamidomethyl[C];	2367.85	6-4-1-0-2	9,	0	0	4	0.18021	0.11188	4.52186	0.50592	y1+;y2+;y4+;y5+;	y1+;y2+;y4+;y5+;	No
MS2.27662.27662.3.0.dta	4550.89	2184.08	3	LAGKPTHVJVSVVMAEVDGTC	21,Carbamidomethyl[C];	2366.83	6-4-2-0-0	9,	0	0	4	0.18021	0.11188	4.52186	0.50592	y1+;y2+;y4+;y5+;	y1+;y2+;y4+;y5+;	No
MS2.3941.3941.3.0.dta	3363.33	776.39	3	EJGTISR	-	2586.92	7-5-1-0-1	2,	7	0.07552	2	0.03221	0.15425	3.26366	0.50341	b2+;y1+;Y0+;Y0+;Y1+;Y1+;Y2+;Y3+;Y4+;	b2+;Y1+;	No
MS2.30194.30194.4.0.dta	5112.21	1795.01	4	VVLHPJYSQVDIGLIK	-	3317.18	9-7-1-0-1	6,	3	0.09843	3	0.08102	0.13046	3.84588	0.50174	b4+;y2+;y5+;Y0+;Y1++;Y2++;	b4+;y5+;Y1++;	No
MS2.37740.37740.4.0.dta	4920.21	3541.72	4	SLGNVJFTVSAEALESQELCGTEVPSVPEHGRK	20,Carbamidomethyl[C];	1378.48	6-2-0-0-0	6,	0	0	3	0.30739	0.16501	3.03913	0.50148	b2+;y6+;y9+;	y6+;y9+;	No
MS2.33382.33382.4.1.dta	4349.97	1780.02	4	LVPVPITJATLDQITGK	-	2569.9	6-5-2-0-0	8,	2	0.0359	12	0.13845	0.23589	2.12398	0.50102	b3+;b12+;y3+;y4+;y6+;y7+;y8+;y9+;y10+;y11+;y13+;y15+;Y0+;Y1+;	b3+;	Yes	1	1	1
MS2.37982.37982.5.0.dta	5166.26	3413.63	5	SLGNVJFTVSAEALESQELCGTEVPSVPEHGR	20,Carbamidomethyl[C];	1752.64	4-4-0-0-2	6,	0	0	2	0.33201	0.16499	3.03379	0.50055	y5+;y8+;	y5+;y8+;	No
MS2.27425.27425.3.1.dta	4085.7	2381.1	3	STGKPTLYJVSLVMSDTAGTCY	14,Oxidation[M];21,Carbamidomethyl[C];	1704.63	3-6-0-0-0	9,	0	0	3	0.28491	0.13067	3.82685	0.50006	b7+;b8+;y2+;	b7+;b8+;y2+;	Yes	3	1	1
MS2.38229.38229.4.3.dta	5166.28	3413.63	4	SLGNVJFTVSAEALESQELCGTEVPSVPEHGR	20,Carbamidomethyl[C];	1752.64	4-4-0-0-2	6,	0	0	2	0.33183	0.16482	3.03379	0.50004	y5+;y8+;	y5+;y8+;	No
MS2.38229.38229.4.0.dta	5165.28	3413.63	4	SLGNVJFTVSAEALESQELCGTEVPSVPEHGR	20,Carbamidomethyl[C];	1751.62	4-4-1-0-0	6,	0	0	2	0.33183	0.16482	3.03379	0.50004	y5+;y8+;	y5+;y8+;	No
MS2.39061.39061.4.1.dta	5287.31	3413.63	4	SLGNVJFTVSAEALESQELCGTEVPSVPEHGR	20,Carbamidomethyl[C];	1873.67	6-3-0-0-2	6,	0	0	2	0.33729	0.16467	3.03379	0.49957	y5+;y8+;	y5+;y8+;	No
MS2.4572.4572.3.1.dta	3491.42	1284.62	3	YKJNSDISSTR	-	2206.81	5-4-0-0-4	3,	2	0.09979	2	0.1094	0.15657	3.19058	0.49955	y4+;y5+;Y0+;Y1+;	y5+;Y1+;	No
MS2.4572.4572.3.0.dta	3490.42	1284.62	3	YKJNSDISSTR	-	2205.79	5-4-1-0-2	3,	2	0.09979	2	0.1094	0.15657	3.19058	0.49955	y4+;y5+;Y0+;Y1+;	y5+;Y1+;	Yes	3	1	1
MS2.39149.39149.4.0.dta	4758.13	3541.72	4	SLGNVJFTVSAEALESQELCGTEVPSVPEHGRK	20,Carbamidomethyl[C];	1216.42	5-2-0-0-0	6,	0	0	2	0.33693	0.16422	3.03913	0.4991	y6+;y9+;	y6+;y9+;	No
MS2.18605.18605.3.0.dta	3344.37	1284.62	3	YKJNSDISSTR	-	2059.73	5-4-1-0-1	3,	2	0.13661	2	0.0706	0.15586	3.19058	0.4973	y5+;y7+;Y0+;Y1+;	y5+;Y1+;	No
MS2.32122.32122.5.0.dta	4656.04	1795.01	5	VVLHPJYSQVDIGLIK	-	2861	6-5-3-0-0	6,	4	0.05227	6	0.07788	0.16325	3.04454	0.49702	b4+;b11+;y2+;y4+;y5+;y12+;Y1+;Y1+;Y1++;Y2++;	b4+;Y1++;	Yes	1	1	1
MS2.32122.32122.5.1.dta	4657.04	1795.01	5	VVLHPJYSQVDIGLIK	-	2862.02	6-5-2-0-2	6,	4	0.05227	6	0.07788	0.16325	3.04454	0.49702	b4+;b11+;y2+;y4+;y5+;y12+;Y1+;Y1+;Y1++;Y2++;	b4+;Y1++;	No
MS2.32122.32122.5.2.dta	4658.04	1795.01	5	VVLHPJYSQVDIGLIK	-	2863.04	6-5-1-0-4	6,	4	0.05227	6	0.07788	0.16325	3.04454	0.49702	b4+;b11+;y2+;y4+;y5+;y12+;Y1+;Y1+;Y1++;Y2++;	b4+;Y1++;	No
MS2.26551.26551.4.2.dta	4025.71	1891.96	4	FYFTPJKTEDTIFLR	-	2133.77	6-5-0-0-1	6,	0	0	8	0.13283	0.16257	3.05561	0.49675	b2+;y1+;y3+;y5+;y7+;y8+;y11+;y14+;	y5+;y8+;	No
MS2.26150.26150.3.1.dta	3484.5	1740.89	3	FSIJTTNVMGTSLTVR	-	1743.61	7-3-0-0-0	4,	0	0	6	0.14861	0.15812	3.13729	0.49608	y1+;y7+;y8+;y9+;y10+;y15+;	y1+;y8+;	No
MS2.8534.8534.3.1.dta	3345.37	1284.62	3	YKJNSDISSTR	-	2060.76	5-4-0-0-3	3,	3	0.15386	1	0.05744	0.12749	3.87262	0.49372	y5+;Y1+;Y1+;Y1++;	y5+;Y1+;Y1++;	No
MS2.8534.8534.3.0.dta	3344.37	1284.62	3	YKJNSDISSTR	-	2059.73	5-4-1-0-1	3,	3	0.15386	1	0.05744	0.12749	3.87262	0.49372	y5+;Y1+;Y1+;Y1++;	y5+;Y1+;Y1++;	Yes	3	1	1
MS2.15470.15470.3.0.dta	3217.26	1157.52	3	EEQFJSTFR	-	2059.73	5-4-1-0-1	5,	7	0.19637	5	0.03395	0.22482	2.19368	0.49319	b3+;y1+;y2+;y3+;y4+;Y0+;Y0+;Y1+;Y1+;Y2+;Y3+;Y4+;	Y1+;	Yes	3	1	1
MS2.31348.31348.4.1.dta	4057.82	1795.01	4	VVLHPJYSQVDIGLIK	-	2262.81	5-5-1-0-1	6,	0	0	9	0.12958	0.16185	3.04454	0.49276	y1+;y2+;y3+;y4+;y5+;y6+;y9+;y10+;y12+;	y4+;y5+;	No
MS2.5233.5233.3.0.dta	3327.36	1284.62	3	YKJNSDISSTR	-	2042.72	4-4-2-0-0	3,	2	0.1234	1	0.12374	0.15407	3.19058	0.49156	y5+;Y0+;Y1+;	y5+;Y1+;	No
MS2.5233.5233.3.1.dta	3328.34	1284.62	3	YKJNSDISSTR	-	2043.74	4-4-1-0-2	3,	2	0.1234	1	0.12374	0.15407	3.19058	0.49156	y5+;Y0+;Y1+;	y5+;Y1+;	No
MS2.33241.33241.4.0.dta	4954.2	3413.63	4	SLGNVJFTVSAEALESQELCGTEVPSVPEHGR	20,Carbamidomethyl[C];	1540.53	7-2-0-0-0	6,	0	0	7	0.19967	0.16201	3.03379	0.4915	b2+;b7+;y3+;y5+;y8+;y9+;y12+;	y5+;y8+;	No
MS2.27989.27989.3.1.dta	4371.82	1581.83	3	FTPJKTEDTIFLR	-	2790	7-6-1-0-1	4,	0	0	5	0.16412	0.15554	3.15914	0.49138	y1+;y5+;y6+;y7+;y8+;	y1+;y5+;	No
MS2.5232.5232.4.0.dta	3345.36	1284.62	4	YKJNSDISSTR	-	2060.76	5-4-0-0-3	3,	1	0.00701	4	0.13874	0.15381	3.19058	0.49075	y4+;y5+;y6+;y7+;Y1+;	y5+;y7+;	No
MS2.5232.5232.4.3.dta	3346.35	993.46	4	JNSDISSTR	-	2352.87	5-4-0-0-5	1,	0	0	4	0.13874	0.15196	3.22517	0.49009	y4+;y5+;y6+;y7+;	y5+;y7+;	No
MS2.7765.7765.3.2.dta	3345.36	1284.62	3	YKJNSDISSTR	-	2060.76	5-4-0-0-3	3,	3	0.09864	3	0.06639	0.15357	3.19058	0.48997	y1+;y4+;y5+;Y0+;Y1+;Y1+;	y5+;Y1+;	No
MS2.7765.7765.3.1.dta	3344.36	1284.62	3	YKJNSDISSTR	-	2059.73	5-4-1-0-1	3,	3	0.09864	3	0.06639	0.15357	3.19058	0.48997	y1+;y4+;y5+;Y0+;Y1+;Y1+;	y5+;Y1+;	No
MS2.4446.4446.3.1.dta	2704.14	1284.62	3	YKJNSDISSTR	-	1419.5	5-3-0-0-0	3,	2	0.19973	1	0.04005	0.12652	3.87262	0.48997	y5+;Y1+;Y1++;	y5+;Y1+;Y1++;	No
MS2.37274.37274.5.0.dta	5124.27	3413.63	5	SLGNVJFTVSAEALESQELCGTEVPSVPEHGR	20,Carbamidomethyl[C];	1710.6	5-3-1-0-0	6,	0	0	2	0.32328	0.16135	3.03379	0.4895	y5+;y8+;	y5+;y8+;	No
MS2.35094.35094.4.0.dta	5165.25	3413.63	4	SLGNVJFTVSAEALESQELCGTEVPSVPEHGR	20,Carbamidomethyl[C];	1751.62	4-4-1-0-0	6,	0	0	6	0.19347	0.15976	3.06356	0.48945	b7+;y3+;y5+;y8+;y9+;y13+;	y5+;y8+;	No
MS2.33431.33431.4.1.dta	5429.27	1891.96	4	FYFTPJKTEDTIFLR	-	3537.28	10-8-0-0-2	6,	3	0.06052	5	0.10684	0.16011	3.05561	0.48922	b2+;y3+;y5+;y6+;y8+;Y0++;Y1++;Y3++;	y5+;Y1++;	No
MS2.37326.37326.4.1.dta	5091.29	3541.72	4	SLGNVJFTVSAEALESQELCGTEVPSVPEHGRK	20,Carbamidomethyl[C];	1549.57	4-3-0-0-2	6,	0	0	3	0.29695	0.16005	3.03913	0.48641	b2+;y6+;y9+;	y6+;y9+;	No
MS2.37326.37326.4.0.dta	5090.27	3541.72	4	SLGNVJFTVSAEALESQELCGTEVPSVPEHGRK	20,Carbamidomethyl[C];	1548.54	4-3-1-0-0	6,	0	0	3	0.29695	0.16005	3.03913	0.48641	b2+;y6+;y9+;	y6+;y9+;	No
MS2.18691.18691.3.0.dta	4205.79	2339.08	3	GLTFQQJASSMCVPDQDTAIR	12,Carbamidomethyl[C];	1866.69	4-6-0-0-0	7,	0	0	2	0.25445	0.15828	3.03913	0.48104	y6+;y8+;	y6+;y8+;	No
MS2.37405.37405.4.1.dta	5253.34	3541.72	4	SLGNVJFTVSAEALESQELCGTEVPSVPEHGRK	20,Carbamidomethyl[C];	1711.62	5-3-0-0-2	6,	0	0	2	0.32047	0.15822	3.03913	0.48086	y6+;y9+;	y6+;y9+;	No
MS2.38403.38403.4.2.dta	4962.21	3413.63	4	SLGNVJFTVSAEALESQELCGTEVPSVPEHGR	20,Carbamidomethyl[C];	1548.54	4-3-1-0-0	6,	0	0	2	0.30986	0.15834	3.03379	0.48036	y5+;y8+;	y5+;y8+;	No
MS2.25060.25060.4.1.dta	3833.69	1408.82	4	LVPVPITJATLDR	-	2424.87	6-5-1-0-1	8,	4	0.19074	2	0.04517	0.152	3.15914	0.48019	b3+;y1+;Y0+;Y1+;Y2+;Y3+;	y1+;Y1+;	Yes	1	1	1
MS2.18580.18580.4.0.dta	4503.93	2184.08	4	LAGKPTHVJVSVVMAEVDGTC	21,Carbamidomethyl[C];	2319.84	5-6-1-0-0	9,	0	0	11	0.14893	0.1587	3.02335	0.47982	b4+;b7+;b8+;b9+;b10+;y1+;y2+;y3+;y4+;y5+;y7+;	b8+;y1+;	No
MS2.25272.25272.4.1.dta	3725.57	1196.66	4	PVPITJATLDR	-	2528.88	7-4-2-0-0	6,	1	0.01697	5	0.13671	0.15031	3.19058	0.47957	b2+;y1+;y4+;y5+;y9+;Y1+;	b2+;y1+;	No
MS2.25272.25272.4.3.dta	3726.58	1196.66	4	PVPITJATLDR	-	2529.9	7-4-1-0-2	6,	1	0.01697	5	0.13671	0.15031	3.19058	0.47957	b2+;y1+;y4+;y5+;y9+;Y1+;	b2+;y1+;	No
MS2.3832.3832.3.1.dta	2727.06	796.347	3	NEEYJK	-	1930.69	6-4-0-0-1	5,	2	0.07144	3	0.04958	0.14564	3.2847	0.47839	b2+;b3+;y2+;Y0+;Y1+;	Y0+;Y1+;	No
MS2.28129.28129.4.4.dta	4303.88	1408.82	4	LVPVPITJATLDR	-	2895.03	8-5-1-0-2	8,	3	0.02666	8	0.06851	0.15134	3.15914	0.4781	b2+;b3+;b4+;y1+;y3+;y4+;y5+;y11+;Y0+;Y1+;Y3+;	y1+;Y1+;	Yes	1	1	1
MS2.13361.13361.3.1.dta	3345.36	1284.62	3	YKJNSDISSTR	-	2060.76	5-4-0-0-3	3,	1	0.15023	1	0.11865	0.14961	3.19058	0.47733	y5+;Y1+;	y5+;Y1+;	No
MS2.13361.13361.3.0.dta	3344.37	1284.62	3	YKJNSDISSTR	-	2059.73	5-4-1-0-1	3,	1	0.15023	1	0.11865	0.14961	3.19058	0.47733	y5+;Y1+;	y5+;Y1+;	No
MS2.27662.27662.3.2.dta	4552.93	2200.07	3	LAGKPTHVJVSVVMAEVDGTC	14,Oxidation[M];21,Carbamidomethyl[C];	2352.85	7-6-0-0-0	9,	0	0	4	0.18021	0.10502	4.52186	0.47491	y1+;y2+;y4+;y5+;	y1+;y2+;y4+;y5+;	No
MS2.37441.37441.4.1.dta	4920.21	3541.72	4	SLGNVJFTVSAEALESQELCGTEVPSVPEHGRK	20,Carbamidomethyl[C];	1378.48	6-2-0-0-0	6,	0	0	2	0.3144	0.15617	3.03913	0.47461	y6+;y9+;	y6+;y9+;	No
MS2.33443.33443.3.0.dta	4404.89	1371.75	3	PITJATLDQITGK	-	3033.11	4-6-2-0-4	4,	3	0.05274	10	0.14306	0.22901	2.06085	0.47196	b2+;b3+;b5+;b8+;y3+;y4+;y6+;y7+;y8+;y9+;Y0+;Y1+;Y1++;	y3+;	No
MS2.10395.10395.3.0.dta	3344.37	1284.62	3	YKJNSDISSTR	-	2059.73	5-4-1-0-1	3,	1	0.13378	2	0.09675	0.14785	3.19058	0.47173	y1+;y5+;Y1+;	y5+;Y1+;	No
MS2.10395.10395.3.1.dta	3345.36	1284.62	3	YKJNSDISSTR	-	2060.76	5-4-0-0-3	3,	1	0.13378	2	0.09675	0.14785	3.19058	0.47173	y1+;y5+;Y1+;	y5+;Y1+;	No
MS2.32311.32311.4.2.dta	4942.21	2679.39	4	MVSHHJLTTGATLINEQWLLTTAK	-	2262.81	5-5-1-0-1	6,	0	0	8	0.15998	0.15363	3.05561	0.46944	y1+;y2+;y3+;y4+;y5+;y6+;y7+;y10+;	y4+;y5+;	No
MS2.26661.26661.4.3.dta	4125.79	1408.82	4	LVPVPITJATLDR	-	2716.98	6-5-1-0-3	8,	6	0.12607	8	0.05594	0.21852	2.14519	0.46876	b2+;b3+;b4+;y1+;y4+;y5+;y9+;y11+;Y0+;Y0+;Y1+;Y1+;Y2+;Y3+;	Y1+;	No
MS2.26661.26661.4.0.dta	4124.79	1408.82	4	LVPVPITJATLDR	-	2715.96	6-5-2-0-1	8,	6	0.12607	8	0.05594	0.21852	2.14519	0.46876	b2+;b3+;b4+;y1+;y4+;y5+;y9+;y11+;Y0+;Y0+;Y1+;Y1+;Y2+;Y3+;	Y1+;	Yes	1	1	1
MS2.9321.9321.3.0.dta	3547.45	1284.62	3	YKJNSDISSTR	-	2262.81	5-5-1-0-1	3,	2	0.10068	1	0.10474	0.12102	3.87262	0.46866	y5+;Y1+;Y1++;	y5+;Y1+;Y1++;	No
MS2.39335.39335.4.2.dta	4963.21	3413.63	4	SLGNVJFTVSAEALESQELCGTEVPSVPEHGR	20,Carbamidomethyl[C];	1549.57	4-3-0-0-2	6,	0	0	2	0.29947	0.15439	3.03379	0.46839	y5+;y8+;	y5+;y8+;	No
MS2.39335.39335.4.3.dta	4962.2	3413.63	4	SLGNVJFTVSAEALESQELCGTEVPSVPEHGR	20,Carbamidomethyl[C];	1548.54	4-3-1-0-0	6,	0	0	2	0.29947	0.15439	3.03379	0.46839	y5+;y8+;	y5+;y8+;	No
MS2.17942.17942.3.3.dta	3561.41	916.456	3	FYFTPJK	-	2644.96	7-6-0-0-2	6,	1	0.12589	1	0.09058	0.14343	3.26366	0.46812	y3+;Y1+;	y3+;Y1+;	No
MS2.17942.17942.3.1.dta	3560.43	916.456	3	FYFTPJK	-	2643.94	7-6-1-0-0	6,	1	0.12589	1	0.09058	0.14343	3.26366	0.46812	y3+;Y1+;	y3+;Y1+;	No
MS2.33543.33543.4.3.dta	5252.29	3541.72	4	SLGNVJFTVSAEALESQELCGTEVPSVPEHGRK	20,Carbamidomethyl[C];	1710.6	5-3-1-0-0	6,	0	0	6	0.20571	0.154	3.03913	0.46803	b2+;b5+;y4+;y6+;y9+;y10+;	y6+;y9+;	No
MS2.35074.35074.4.1.dta	5090.3	3541.72	4	SLGNVJFTVSAEALESQELCGTEVPSVPEHGRK	20,Carbamidomethyl[C];	1548.54	4-3-1-0-0	6,	0	0	3	0.27726	0.15394	3.03913	0.46785	y3+;y6+;y9+;	y6+;y9+;	No
MS2.4017.4017.3.0.dta	3711.44	776.39	3	EJGTISR	-	2935.04	7-6-2-0-0	2,	7	0.25376	1	0.00762	0.20989	2.22193	0.46636	y1+;Y0+;Y0+;Y1+;Y1+;Y2+;Y3+;Y4+;	Y1+;	No
MS2.5658.5658.4.1.dta	3547.44	1284.62	4	YKJNSDISSTR	-	2262.81	5-5-1-0-1	3,	2	0.16402	1	0.05161	0.11992	3.87262	0.46441	y5+;Y1+;Y1++;	y5+;Y1+;Y1++;	No
MS2.27912.27912.4.0.dta	4736.91	1581.83	4	FTPJKTEDTIFLR	-	3155.13	8-7-1-0-1	4,	0	0	6	0.12453	0.1469	3.15914	0.46408	b8+;y1+;y3+;y5+;y6+;y9+;	y1+;y5+;	No
MS2.9246.9246.3.0.dta	3344.37	1284.62	3	YKJNSDISSTR	-	2059.73	5-4-1-0-1	3,	1	0.14329	1	0.11322	0.14501	3.19058	0.46267	y5+;Y1+;	y5+;Y1+;	Yes	3	1	1
MS2.9246.9246.3.1.dta	3345.37	1284.62	3	YKJNSDISSTR	-	2060.76	5-4-0-0-3	3,	1	0.14329	1	0.11322	0.14501	3.19058	0.46267	y5+;Y1+;	y5+;Y1+;	No
MS2.39372.39372.4.0.dta	4758.18	3541.72	4	SLGNVJFTVSAEALESQELCGTEVPSVPEHGRK	20,Carbamidomethyl[C];	1216.42	5-2-0-0-0	6,	0	0	2	0.29882	0.1508	3.03913	0.45831	y6+;y9+;	y6+;y9+;	No
MS2.2440.2440.2.1.dta	2710.04	796.347	2	NEEYJK	-	1913.68	5-4-1-0-0	5,	1	0.23343	1	0.03852	0.13939	3.2847	0.45784	b2+;Y0+;	b2+;Y0+;	No
MS2.2440.2440.3.0.dta	4063.53	796.347	3	NEEYJK	-	3267.16	6-7-3-0-0	5,	1	0.23343	1	0.03852	0.13939	3.2847	0.45784	b2+;Y0+;	b2+;Y0+;	No
MS2.12669.12669.3.1.dta	3344.36	1284.62	3	YKJNSDISSTR	-	2059.73	5-4-1-0-1	3,	2	0.1333	1	0.09034	0.14333	3.19058	0.4573	y5+;Y0+;Y1+;	y5+;Y1+;	Yes	3	1	1
MS2.12669.12669.3.2.dta	3345.36	1284.62	3	YKJNSDISSTR	-	2060.76	5-4-0-0-3	3,	2	0.1333	1	0.09034	0.14333	3.19058	0.4573	y5+;Y0+;Y1+;	y5+;Y1+;	No
MS2.25816.25816.4.2.dta	3524.53	1593.83	4	SIJTTNVMGTSLTVR	-	1930.69	6-4-0-0-1	3,	1	0.02031	6	0.12279	0.14557	3.1303	0.45567	y1+;y3+;y5+;y7+;y8+;y9+;Y1+;	y7+;y8+;	No
MS2.13583.13583.3.0.dta	3344.36	1284.62	3	YKJNSDISSTR	-	2059.73	5-4-1-0-1	3,	1	0.13837	1	0.11183	0.14277	3.19058	0.45553	y5+;Y1+;	y5+;Y1+;	Yes	3	1	1
MS2.13583.13583.3.1.dta	3345.36	1284.62	3	YKJNSDISSTR	-	2060.76	5-4-0-0-3	3,	1	0.13837	1	0.11183	0.14277	3.19058	0.45553	y5+;Y1+;	y5+;Y1+;	No
MS2.29787.29787.4.3.dta	3855.76	1795.01	4	VVLHPJYSQVDIGLIK	-	2060.76	5-4-0-0-3	6,	2	0.12341	2	0.06357	0.1184	3.84588	0.45534	b4+;y5+;Y0+;Y1++;	b4+;Y0+;Y1++;	No
MS2.29787.29787.4.1.dta	3854.75	1795.01	4	VVLHPJYSQVDIGLIK	-	2059.73	5-4-1-0-1	6,	2	0.12341	2	0.06357	0.1184	3.84588	0.45534	b4+;y5+;Y0+;Y1++;	b4+;Y0+;Y1++;	No
MS2.37960.37960.5.0.dta	5287.3	3413.63	5	SLGNVJFTVSAEALESQELCGTEVPSVPEHGR	20,Carbamidomethyl[C];	1873.67	6-3-0-0-2	6,	0	0	2	0.25836	0.14963	3.03379	0.45395	y8+;y9+;	y8+;y9+;	No
MS2.38476.38476.4.1.dta	5165.26	3413.63	4	SLGNVJFTVSAEALESQELCGTEVPSVPEHGR	20,Carbamidomethyl[C];	1751.62	4-4-1-0-0	6,	0	0	2	0.27812	0.14645	3.096	0.45341	y5+;y8+;	y5+;y8+;	No
MS2.7984.7984.3.1.dta	3453.34	1189.51	3	EEQYJSTYR	-	2263.83	5-5-0-0-3	5,	3	0.18936	2	0.02192	0.14029	3.22517	0.45246	y1+;y2+;Y0+;Y1+;Y2+;	Y1+;Y2+;	No
MS2.7984.7984.3.0.dta	3452.34	1189.51	3	EEQYJSTYR	-	2262.81	5-5-1-0-1	5,	3	0.18936	2	0.02192	0.14029	3.22517	0.45246	y1+;y2+;Y0+;Y1+;Y2+;	Y1+;Y2+;	Yes	3	1	1
MS2.14104.14104.3.1.dta	3345.36	1284.62	3	YKJNSDISSTR	-	2060.76	5-4-0-0-3	3,	1	0.14068	1	0.10753	0.14172	3.19058	0.45215	y5+;Y1+;	y5+;Y1+;	No
MS2.14104.14104.3.0.dta	3344.36	1284.62	3	YKJNSDISSTR	-	2059.73	5-4-1-0-1	3,	1	0.14068	1	0.10753	0.14172	3.19058	0.45215	y5+;Y1+;	y5+;Y1+;	Yes	3	1	1
MS2.3930.3930.3.0.dta	4165.62	776.39	3	EJGTISR	-	3389.21	8-6-2-0-2	2,	5	0.13204	1	0.0079	0.13853	3.26366	0.45213	y1+;Y0+;Y1+;Y2+;Y3+;Y4+;	Y2+;Y4+;	No
MS2.3930.3930.3.1.dta	4167.63	776.39	3	EJGTISR	-	3391.22	10-8-0-0-1	2,	5	0.13204	1	0.0079	0.13853	3.26366	0.45213	y1+;Y0+;Y1+;Y2+;Y3+;Y4+;	Y2+;Y4+;	No
MS2.28094.28094.3.0.dta	4460.87	1744.89	3	YFTPJKTEDTIFLR	-	2715.96	6-5-2-0-1	5,	1	0.03603	4	0.15379	0.14773	3.05003	0.45057	b2+;y1+;y5+;y8+;Y1+;	y1+;y5+;	Yes	3	1	1
MS2.11060.11060.3.0.dta	3344.36	1284.62	3	YKJNSDISSTR	-	2059.73	5-4-1-0-1	3,	1	0.10837	2	0.08304	0.14109	3.19058	0.45015	y5+;y7+;Y1+;	y5+;Y1+;	No
MS2.11060.11060.3.1.dta	3345.36	1284.62	3	YKJNSDISSTR	-	2060.76	5-4-0-0-3	3,	1	0.10837	2	0.08304	0.14109	3.19058	0.45015	y5+;y7+;Y1+;	y5+;Y1+;	No
MS2.2288.2288.3.1.dta	2711.04	796.347	3	NEEYJK	-	1914.7	5-4-0-0-2	5,	1	0.19049	1	0.047	0.13681	3.2847	0.44937	b3+;Y0+;	b3+;Y0+;	No
MS2.2288.2288.3.0.dta	2710.04	796.347	3	NEEYJK	-	1913.68	5-4-1-0-0	5,	1	0.19049	1	0.047	0.13681	3.2847	0.44937	b3+;Y0+;	b3+;Y0+;	Yes	3	1	1
MS2.36176.36176.4.1.dta	5415.34	3541.72	4	SLGNVJFTVSAEALESQELCGTEVPSVPEHGRK	20,Carbamidomethyl[C];	1873.67	6-3-0-0-2	6,	0	0	3	0.25978	0.14738	3.03913	0.44791	y6+;y9+;y10+;	y6+;y9+;	No
MS2.8632.8632.3.1.dta	3066.24	916.456	3	FYFTPJK	-	2149.77	7-5-0-0-0	6,	0	0	2	0.18123	0.13696	3.26366	0.44698	y3+;y6+;	y3+;y6+;	No
MS2.38802.38802.4.3.dta	5328.33	3413.63	4	SLGNVJFTVSAEALESQELCGTEVPSVPEHGR	20,Carbamidomethyl[C];	1914.7	5-4-0-0-2	6,	0	0	2	0.28369	0.14718	3.03379	0.44651	y5+;y8+;	y5+;y8+;	No
MS2.38802.38802.4.0.dta	5327.3	3413.63	4	SLGNVJFTVSAEALESQELCGTEVPSVPEHGR	20,Carbamidomethyl[C];	1913.68	5-4-1-0-0	6,	0	0	2	0.28369	0.14718	3.03379	0.44651	y5+;y8+;	y5+;y8+;	No
MS2.33443.33443.3.1.dta	4406.91	1567.87	3	PVPITJATLDQITGK	-	2839	10-6-0-0-0	6,	2	0.03152	9	0.14546	0.20966	2.12398	0.44531	b3+;b4+;y3+;y4+;y6+;y7+;y8+;y9+;y13+;Y0+;Y0+;	y3+;	No
MS2.5318.5318.3.1.dta	3165.26	1284.62	3	YKJNSDISSTR	-	1880.67	3-4-2-0-0	3,	0	0	3	0.15891	0.13889	3.19058	0.44314	y1+;y5+;y7+;	y5+;y7+;	No
MS2.14877.14877.3.0.dta	3344.36	1284.62	3	YKJNSDISSTR	-	2059.73	5-4-1-0-1	3,	2	0.14815	1	0.06853	0.13861	3.19058	0.44226	y5+;Y0+;Y1+;	y5+;Y1+;	No
MS2.14877.14877.3.1.dta	3345.37	1284.62	3	YKJNSDISSTR	-	2060.76	5-4-0-0-3	3,	2	0.14815	1	0.06853	0.13861	3.19058	0.44226	y5+;Y0+;Y1+;	y5+;Y1+;	No
MS2.22303.22303.4.2.dta	4414.78	2339.08	4	GLTFQQJASSMCVPDQDTAIR	12,Carbamidomethyl[C];	2075.73	6-4-1-0-0	7,	0	0	5	0.11826	0.14527	3.03913	0.44149	y1+;y4+;y6+;y8+;y12+;	y6+;y8+;	No
MS2.18579.18579.4.1.dta	4795.03	2184.08	4	LAGKPTHVJVSVVMAEVDGTC	21,Carbamidomethyl[C];	2610.93	5-6-2-0-0	9,	0	0	11	0.11399	0.1453	3.02335	0.43931	b4+;b6+;b7+;b8+;b10+;b12+;y2+;y3+;y4+;y5+;y7+;	y4+;y5+;	No
MS2.36430.36430.4.1.dta	5091.28	3541.72	4	SLGNVJFTVSAEALESQELCGTEVPSVPEHGRK	20,Carbamidomethyl[C];	1549.57	4-3-0-0-2	6,	0	0	3	0.25376	0.14447	3.03913	0.43905	y4+;y6+;y9+;	y6+;y9+;	No
MS2.16732.16732.3.1.dta	3345.37	1284.6	3	MVSHHJLTTGAT	1,Oxidation[M];	2060.76	5-4-0-0-3	6,	2	0.09498	1	0.05387	0.10957	4.00056	0.43833	y6+;Y0+;Y1+;	y6+;Y0+;Y1+;	No
MS2.11750.11750.3.0.dta	3503.39	1183.54	3	GLTFQQJASSM	-	2319.84	5-6-1-0-0	7,	0	0	6	0.1203	0.13722	3.19058	0.43781	b3+;b5+;b6+;b7+;b8+;b9+;	b8+;b9+;	No
MS2.11750.11750.3.1.dta	3504.4	1183.54	3	GLTFQQJASSM	-	2320.86	5-6-0-0-2	7,	0	0	6	0.1203	0.13722	3.19058	0.43781	b3+;b5+;b6+;b7+;b8+;b9+;	b8+;b9+;	No
MS2.33991.33991.3.1.dta	4804.13	1780.02	3	LVPVPITJATLDQITGK	-	3024.07	7-5-2-0-2	8,	2	0.01863	11	0.12168	0.20595	2.12398	0.43744	b3+;y3+;y5+;y6+;y7+;y8+;y9+;y10+;y11+;y13+;y15+;Y0+;Y1+;	y3+;	Yes	3	1	1
MS2.35521.35521.4.1.dta	5415.39	3541.72	4	SLGNVJFTVSAEALESQELCGTEVPSVPEHGRK	20,Carbamidomethyl[C];	1873.67	6-3-0-0-2	6,	0	0	3	0.25049	0.14369	3.03913	0.4367	y4+;y6+;y9+;	y6+;y9+;	No
MS2.36542.36542.4.1.dta	4920.2	3541.72	4	SLGNVJFTVSAEALESQELCGTEVPSVPEHGRK	20,Carbamidomethyl[C];	1378.48	6-2-0-0-0	6,	0	0	4	0.18751	0.13071	3.33432	0.43584	y3+;y6+;y9+;y11+;	y6+;y9+;	Yes	3	1	1
MS2.3682.3682.3.1.dta	3018.16	796.347	3	NEEYJK	-	2221.79	6-4-1-0-1	5,	3	0.03598	6	0.05799	0.1932	2.23735	0.43226	b2+;b3+;b4+;b5+;y2+;y3+;Y0+;Y0+;Y1+;	Y0+;	Yes	1	1	1
MS2.4558.4558.3.0.dta	2979.24	1284.62	3	YKJNSDISSTR	-	1694.6	4-3-1-0-1	3,	1	0.10771	1	0.11894	0.13533	3.19058	0.4318	y5+;Y1+;	y5+;Y1+;	No
MS2.4558.4558.3.1.dta	2980.24	1284.62	3	YKJNSDISSTR	-	1695.62	4-3-0-0-3	3,	1	0.10771	1	0.11894	0.13533	3.19058	0.4318	y5+;Y1+;	y5+;Y1+;	No
MS2.4991.4991.3.0.dta	3256.3	993.46	3	JNSDISSTR	-	2262.81	5-5-1-0-1	1,	0	0	2	0.16428	0.13388	3.22517	0.43179	y5+;y7+;	y5+;y7+;	Yes	3	0	0
MS2.8365.8365.3.2.dta	3577.43	916.456	3	FYFTPJK	-	2660.96	8-6-0-0-1	6,	0	0	2	0.17837	0.13219	3.26366	0.43144	y3+;y6+;	y3+;y6+;	No
MS2.12706.12706.3.0.dta	4013.58	1920.85	3	QQJASSMCVPDQDTAIR	8,Carbamidomethyl[C];	2092.75	7-4-0-0-1	3,	0	0	3	0.13222	0.11172	3.8331	0.42824	y4+;y6+;y8+;	y4+;y6+;y8+;	No
MS2.13359.13359.4.0.dta	5343.08	1555.71	4	THTJISESHPJATF	-	3787.35	11-7-1-0-2	4,	7	0.11283	3	0.04414	0.14103	3.03379	0.42784	b2+;b5+;y5+;Y1+;Y1+;Y2+;Y1++;Y1++;Y2++;Y2++;	b2+;Y2++;	No
MS2.13359.13359.4.1.dta	5342.04	1555.71	4	THTJISESHPJATF	-	3786.33	11-7-2-0-0	4,	7	0.11283	3	0.04414	0.14103	3.03379	0.42784	b2+;b5+;y5+;Y1+;Y1+;Y2+;Y1++;Y1++;Y2++;Y2++;	b2+;Y2++;	No
MS2.24344.24344.4.3.dta	4576.9	2339.08	4	GLTFQQJASSMCVPDQDTAIR	12,Carbamidomethyl[C];	2237.78	7-4-1-0-0	7,	0	0	3	0.17119	0.14038	3.03913	0.42663	y1+;y4+;y8+;	y4+;y8+;	No
MS2.30344.30344.4.3.dta	5646.31	1744.89	4	YFTPJKTEDTIFLR	-	3901.42	9-7-1-0-5	5,	3	0.0847	2	0.05705	0.11065	3.85241	0.42626	y1+;y5+;Y1+;Y0++;Y1++;	y5+;Y1+;Y1++;	No
MS2.30344.30344.4.1.dta	5645.32	1744.89	4	YFTPJKTEDTIFLR	-	3900.4	9-7-2-0-3	5,	3	0.0847	2	0.05705	0.11065	3.85241	0.42626	y1+;y5+;Y1+;Y0++;Y1++;	y5+;Y1+;Y1++;	No
MS2.27626.27626.4.0.dta	4415.86	2339.08	4	GLTFQQJASSMCVPDQDTAIR	12,Carbamidomethyl[C];	2076.75	6-4-0-0-2	7,	0	0	2	0.207	0.14005	3.03913	0.42562	y6+;y8+;	y6+;y8+;	No
MS2.9469.9469.3.1.dta	3344.36	1284.62	3	YKJNSDISSTR	-	2059.73	5-4-1-0-1	3,	2	0.1409	1	0.06392	0.13337	3.19058	0.42552	y5+;Y0+;Y1+;	y5+;Y1+;	No
MS2.9469.9469.3.2.dta	3345.37	1284.62	3	YKJNSDISSTR	-	2060.76	5-4-0-0-3	3,	2	0.1409	1	0.06392	0.13337	3.19058	0.42552	y5+;Y0+;Y1+;	y5+;Y1+;	No
MS2.23714.23714.4.1.dta	3962.66	2381.1	4	STGKPTLYJVSLVMSDTAGTCY	14,Oxidation[M];21,Carbamidomethyl[C];	1581.56	6-3-0-0-0	9,	0	0	4	0.19726	0.11117	3.82685	0.42543	b7+;b8+;y1+;y2+;	b8+;y1+;y2+;	No
MS2.24292.24292.4.1.dta	4533.91	1581.83	4	FTPJKTEDTIFLR	-	2952.05	8-6-1-0-1	4,	2	0.098	3	0.06778	0.1341	3.15914	0.42364	y3+;y5+;y8+;Y1+;Y1+;	y5+;Y1+;	No
MS2.23921.23921.4.1.dta	4618.91	2339.08	4	GLTFQQJASSMCVPDQDTAIR	12,Carbamidomethyl[C];	2279.83	6-5-0-0-2	7,	0	0	2	0.20218	0.13919	3.03913	0.42302	y6+;y8+;	y6+;y8+;	No
MS2.7690.7690.3.2.dta	2979.23	1284.62	3	YKJNSDISSTR	-	1694.6	4-3-1-0-1	3,	4	0.11062	2	0.02472	0.13247	3.19058	0.42265	y1+;y5+;Y0+;Y0+;Y1+;Y1+;	Y1+;Y1+;	No
MS2.13877.13877.3.1.dta	3345.37	1284.62	3	YKJNSDISSTR	-	2060.76	5-4-0-0-3	3,	1	0.16206	1	0.06987	0.13197	3.19058	0.42105	y5+;Y1+;	y5+;Y1+;	No
MS2.13877.13877.3.0.dta	3344.36	1284.62	3	YKJNSDISSTR	-	2059.73	5-4-1-0-1	3,	1	0.16206	1	0.06987	0.13197	3.19058	0.42105	y5+;Y1+;	y5+;Y1+;	Yes	3	1	1
MS2.19989.19989.3.2.dta	3488.37	916.456	3	FYFTPJK	-	2571.95	6-5-0-0-4	6,	2	0.06009	2	0.05497	0.12825	3.26366	0.41858	b2+;y3+;Y1+;Y2+;	y3+;Y1+;	No
MS2.19989.19989.3.1.dta	3487.37	916.456	3	FYFTPJK	-	2570.93	6-5-1-0-2	6,	2	0.06009	2	0.05497	0.12825	3.26366	0.41858	b2+;y3+;Y1+;Y2+;	y3+;Y1+;	No
MS2.19989.19989.3.0.dta	3486.37	916.456	3	FYFTPJK	-	2569.9	6-5-2-0-0	6,	2	0.06009	2	0.05497	0.12825	3.26366	0.41858	b2+;y3+;Y1+;Y2+;	y3+;Y1+;	No
MS2.37224.37224.4.1.dta	5456.42	3541.72	4	SLGNVJFTVSAEALESQELCGTEVPSVPEHGRK	20,Carbamidomethyl[C];	1914.7	5-4-0-0-2	6,	0	0	2	0.26328	0.13772	3.03913	0.41854	y6+;y9+;	y6+;y9+;	No
MS2.33456.33456.3.0.dta	5118.12	1891.96	3	FYFTPJKTEDTIFLR	-	3226.13	7-6-3-0-0	6,	2	0.03073	3	0.15569	0.1366	3.05561	0.41741	b2+;y1+;y5+;Y0++;Y1++;	b2+;y5+;	No
MS2.10763.10763.3.0.dta	3547.45	1284.62	3	YKJNSDISSTR	-	2262.81	5-5-1-0-1	3,	1	0.15518	1	0.07205	0.13072	3.19058	0.41708	y5+;Y1+;	y5+;Y1+;	No
MS2.10763.10763.3.1.dta	3548.45	1284.62	3	YKJNSDISSTR	-	2263.83	5-5-0-0-3	3,	1	0.15518	1	0.07205	0.13072	3.19058	0.41708	y5+;Y1+;	y5+;Y1+;	No
MS2.13211.13211.3.1.dta	3018.29	958.557	3	TPLTAJITK	-	2059.73	5-4-1-0-1	6,	3	0.08218	3	0.02261	0.12929	3.22517	0.417	b3+;b4+;b7+;Y0+;Y0+;Y1+;	Y0+;Y1+;	Yes	3	1	1
MS2.13211.13211.3.2.dta	3019.3	958.557	3	TPLTAJITK	-	2060.76	5-4-0-0-3	6,	3	0.08218	3	0.02261	0.12929	3.22517	0.417	b3+;b4+;b7+;Y0+;Y0+;Y1+;	Y0+;Y1+;	No
MS2.12893.12893.3.3.dta	3422.38	1555.71	3	THTJISESHPJATF	-	1866.69	4-6-0-0-0	11,	0	0	2	0.28115	0.13738	3.03379	0.41678	b2+;b9+;	b2+;b9+;	Yes	3	1	1
MS2.12893.12893.3.1.dta	3420.35	1555.71	3	THTJISESHPJATF	-	1864.63	9-2-0-0-0	11,	0	0	2	0.28115	0.13738	3.03379	0.41678	b2+;b9+;	b2+;b9+;	No
MS2.26969.26969.4.1.dta	3978.73	1408.82	4	LVPVPITJATLDR	-	2569.9	6-5-2-0-0	8,	5	0.12187	7	0.04799	0.19414	2.14519	0.41647	b3+;b4+;y1+;y4+;y5+;y9+;y11+;Y0+;Y1+;Y1+;Y2+;Y3+;	Y1+;	Yes	1	1	1
MS2.26969.26969.4.3.dta	3980.74	1408.82	4	LVPVPITJATLDR	-	2571.95	6-5-0-0-4	8,	5	0.12187	7	0.04799	0.19414	2.14519	0.41647	b3+;b4+;y1+;y4+;y5+;y9+;y11+;Y0+;Y1+;Y1+;Y2+;Y3+;	Y1+;	Yes	1	1	1
MS2.5914.5914.3.0.dta	3547.44	1284.62	3	YKJNSDISSTR	-	2262.81	5-5-1-0-1	3,	1	0.09358	1	0.11927	0.13053	3.19058	0.41646	y5+;Y1+;	y5+;Y1+;	No
MS2.39573.39573.4.1.dta	5327.32	3413.63	4	SLGNVJFTVSAEALESQELCGTEVPSVPEHGR	20,Carbamidomethyl[C];	1913.68	5-4-1-0-0	6,	0	0	2	0.25194	0.13727	3.03379	0.41646	y5+;y8+;	y5+;y8+;	No
MS2.39573.39573.4.3.dta	5328.33	3413.63	4	SLGNVJFTVSAEALESQELCGTEVPSVPEHGR	20,Carbamidomethyl[C];	1914.7	5-4-0-0-2	6,	0	0	2	0.25194	0.13727	3.03379	0.41646	y5+;y8+;	y5+;y8+;	No
MS2.3077.3077.3.1.dta	2784.07	796.347	3	NEEYJK	-	1987.71	6-5-0-0-0	5,	2	0.15944	1	0.01804	0.12642	3.2847	0.41526	y2+;Y0+;Y1+;	Y0+;Y1+;	No
MS2.7580.7580.3.1.dta	3547.45	1284.62	3	YKJNSDISSTR	-	2262.81	5-5-1-0-1	3,	1	0.073	2	0.09568	0.12963	3.19058	0.41361	y4+;y5+;Y1+;	y5+;Y1+;	Yes	3	1	1
MS2.29088.29088.4.3.dta	5355.19	1744.89	4	YFTPJKTEDTIFLR	-	3610.3	11-9-0-0-0	5,	3	0.09831	2	0.04102	0.10719	3.85241	0.41296	b2+;y5+;Y1+;Y0++;Y1++;	y5+;Y1+;Y1++;	No
MS2.29088.29088.4.0.dta	5353.2	1744.89	4	YFTPJKTEDTIFLR	-	3608.28	9-7-2-0-1	5,	3	0.09831	2	0.04102	0.10719	3.85241	0.41296	b2+;y5+;Y1+;Y0++;Y1++;	y5+;Y1+;Y1++;	No
MS2.32311.32311.4.0.dta	4941.22	2695.39	4	MVSHHJLTTGATLINEQWLLTTAK	1,Oxidation[M];	2245.8	4-5-2-0-0	6,	0	0	8	0.15998	0.13487	3.05561	0.4121	y1+;y2+;y3+;y4+;y5+;y6+;y7+;y10+;	y4+;y5+;	No
MS2.31990.31990.3.2.dta	4170.8	1891.96	3	FYFTPJKTEDTIFLR	-	2278.81	6-5-1-0-0	6,	2	0.02055	4	0.1181	0.1331	3.08517	0.41064	b2+;b3+;y5+;y8+;Y0++;Y1++;	b2+;y5+;	Yes	3	1	1
MS2.31990.31990.3.3.dta	4171.79	1891.96	3	FYFTPJKTEDTIFLR	-	2279.83	6-5-0-0-2	6,	2	0.02055	4	0.1181	0.1331	3.08517	0.41064	b2+;b3+;y5+;y8+;Y0++;Y1++;	b2+;y5+;	No
MS2.28439.28439.3.0.dta	4705.93	2339.08	3	GLTFQQJASSMCVPDQDTAIR	12,Carbamidomethyl[C];	2366.83	6-4-2-0-0	7,	0	0	2	0.17125	0.13506	3.03913	0.41047	y4+;y8+;	y4+;y8+;	No
MS2.25590.25590.4.0.dta	4107.72	2355.07	4	GLTFQQJASSMCVPDQDTAIR	11,Oxidation[M];12,Carbamidomethyl[C];	1752.64	4-4-0-0-2	7,	0	0	2	0.21121	0.13481	3.04454	0.41043	y1+;y8+;	y1+;y8+;	No
MS2.26164.26164.3.1.dta	3143.39	1593.83	3	SIJTTNVMGTSLTVR	-	1549.57	4-3-0-0-2	3,	1	0.10108	2	0.06377	0.10387	3.94791	0.41007	y7+;y8+;Y1+;	y7+;y8+;Y1+;	No
MS2.26164.26164.3.0.dta	3142.39	1593.83	3	SIJTTNVMGTSLTVR	-	1548.54	4-3-1-0-0	3,	1	0.10108	2	0.06377	0.10387	3.94791	0.41007	y7+;y8+;Y1+;	y7+;y8+;Y1+;	No
MS2.5394.5394.3.0.dta	3198.31	1284.62	3	YKJNSDISSTR	-	1913.68	5-4-1-0-0	3,	1	0.01839	2	0.12611	0.12844	3.19058	0.4098	y5+;y7+;Y1+;	y5+;y7+;	No
MS2.5394.5394.3.1.dta	3199.3	1284.62	3	YKJNSDISSTR	-	1914.7	5-4-0-0-2	3,	1	0.01839	2	0.12611	0.12844	3.19058	0.4098	y5+;y7+;Y1+;	y5+;y7+;	No
MS2.28567.28567.3.2.dta	4317.81	1891.96	3	FYFTPJKTEDTIFLR	-	2425.89	6-5-0-0-3	6,	0	0	11	0.15883	0.19792	2.06901	0.40951	b2+;y1+;y2+;y3+;y4+;y6+;y7+;y8+;y9+;y11+;y14+;	b2+;	No
MS2.34363.34363.4.2.dta	4962.2	3413.63	4	SLGNVJFTVSAEALESQELCGTEVPSVPEHGR	20,Carbamidomethyl[C];	1548.54	4-3-1-0-0	6,	0	0	4	0.18853	0.13488	3.03379	0.4092	y3+;y5+;y8+;y9+;	y5+;y8+;	No
MS2.10527.10527.3.0.dta	2979.23	1284.62	3	YKJNSDISSTR	-	1694.6	4-3-1-0-1	3,	2	0.13238	1	0.05728	0.12815	3.19058	0.40888	y5+;Y0+;Y1+;	y5+;Y1+;	No
MS2.4152.4152.3.1.dta	2858.08	993.46	3	JNSDISSTR	-	1864.63	9-2-0-0-0	1,	1	0.02647	3	0.08618	0.1267	3.22517	0.40864	y1+;y4+;y5+;Y1+;	y5+;Y1+;	No
MS2.25046.25046.4.1.dta	4679.88	1920.85	4	QQJASSMCVPDQDTAIR	8,Carbamidomethyl[C];	2759.03	5-6-0-0-5	3,	0	0	4	0.15499	0.13444	3.03379	0.40786	y1+;y4+;y6+;y8+;	y4+;y8+;	No
MS2.29101.29101.4.4.dta	4910.04	1753.93	4	CANLVPVPITJATLDR	1,Carbamidomethyl[C];	3156.15	8-7-0-0-3	11,	0	0	3	0.1636	0.10299	3.95624	0.40745	b2+;b3+;b4+;	b2+;b3+;b4+;	No
MS2.37273.37273.5.0.dta	5456.42	3541.72	5	SLGNVJFTVSAEALESQELCGTEVPSVPEHGRK	20,Carbamidomethyl[C];	1914.7	5-4-0-0-2	6,	0	0	2	0.25137	0.13367	3.03913	0.40624	y6+;y9+;	y6+;y9+;	No
MS2.15905.15905.3.3.dta	4030.65	1458.73	3	NLFLJHSEJATAK	-	2571.95	6-5-0-0-4	5,	4	0.12849	1	0.02139	0.1051	3.84588	0.4042	b3+;Y0+;Y0+;Y1+;Y0++;	Y0+;Y0+;Y1+;	No
MS2.15905.15905.3.0.dta	4028.67	1458.73	3	NLFLJHSEJATAK	-	2569.9	6-5-2-0-0	5,	4	0.12849	1	0.02139	0.1051	3.84588	0.4042	b3+;Y0+;Y0+;Y1+;Y0++;	Y0+;Y0+;Y1+;	Yes	3	1	1
MS2.3632.3632.3.0.dta	3749.39	796.347	3	NEEYJK	-	2953.07	8-6-0-0-3	5,	2	0.15233	1	0.01405	0.12261	3.2847	0.40274	b3+;Y0+;Y1+;	Y0+;Y1+;	No
MS2.36419.36419.5.0.dta	5456.43	3541.72	5	SLGNVJFTVSAEALESQELCGTEVPSVPEHGRK	20,Carbamidomethyl[C];	1914.7	5-4-0-0-2	6,	0	0	2	0.24662	0.132	3.03913	0.40117	y6+;y9+;	y6+;y9+;	No
MS2.32111.32111.4.1.dta	4551.95	2184.08	4	LAGKPTHVJVSVVMAEVDGTC	21,Carbamidomethyl[C];	2367.85	6-4-1-0-2	9,	1	0.0103	6	0.14576	0.13224	3.02335	0.39981	b8+;b10+;y1+;y2+;y4+;y5+;Y1++;	y1+;y2+;	No
MS2.12694.12694.3.0.dta	2967.2	1157.52	3	EEQFJSTFR	-	1809.67	4-5-0-0-1	5,	2	0.19534	1	0.02828	0.12388	3.22517	0.39952	y1+;Y0+;Y1+;	Y0+;Y1+;	Yes	3	1	1
MS2.32927.32927.3.2.dta	4700.01	2363.14	3	LAGKPTHVJVSVVMAEVDGTCY	14,Oxidation[M];21,Carbamidomethyl[C];	2336.85	6-6-0-0-1	9,	0	0	5	0.12595	0.10335	3.86414	0.39937	b7+;b8+;b10+;b11+;y2+;	b8+;b10+;y2+;	No
MS2.4200.4200.3.0.dta	3363.34	776.39	3	EJGTISR	-	2586.92	7-5-1-0-1	2,	7	0.09665	3	0.02637	0.17907	2.22193	0.39788	b2+;y1+;y5+;Y0+;Y0+;Y1+;Y1+;Y2+;Y3+;Y4+;	Y1+;	No
MS2.22913.22913.4.0.dta	4455.82	2339.08	4	GLTFQQJASSMCVPDQDTAIR	12,Carbamidomethyl[C];	2116.76	5-5-1-0-0	7,	0	0	4	0.1063	0.12811	3.10123	0.3973	y1+;y4+;y6+;y8+;	y6+;y8+;	No
MS2.32574.32574.4.2.dta	4941.22	2695.39	4	MVSHHJLTTGATLINEQWLLTTAK	1,Oxidation[M];	2245.8	4-5-2-0-0	6,	0	0	5	0.14621	0.10291	3.85904	0.39715	y3+;y4+;y5+;y6+;y7+;	y3+;y4+;y5+;	No
MS2.35849.35849.4.1.dta	5294.36	3541.72	4	SLGNVJFTVSAEALESQELCGTEVPSVPEHGRK	20,Carbamidomethyl[C];	1752.64	4-4-0-0-2	6,	0	0	3	0.21725	0.13046	3.03913	0.39649	b5+;y6+;y9+;	y6+;y9+;	No
MS2.25359.25359.4.1.dta	3687.64	1408.82	4	LVPVPITJATLDR	-	2278.81	6-5-1-0-0	8,	4	0.15366	5	0.05063	0.18479	2.14519	0.3964	b3+;y1+;y5+;y9+;y11+;Y0+;Y1+;Y2+;Y3+;	Y1+;	Yes	1	1	1
MS2.25359.25359.4.3.dta	3688.64	1408.82	4	LVPVPITJATLDR	-	2279.83	6-5-0-0-2	8,	4	0.15366	5	0.05063	0.18479	2.14519	0.3964	b3+;y1+;y5+;y9+;y11+;Y0+;Y1+;Y2+;Y3+;	Y1+;	No
MS2.34870.34870.4.1.dta	4920.2	3541.72	4	SLGNVJFTVSAEALESQELCGTEVPSVPEHGRK	20,Carbamidomethyl[C];	1378.48	6-2-0-0-0	6,	0	0	2	0.24233	0.13043	3.03913	0.39639	y6+;y9+;	y6+;y9+;	No
MS2.16091.16091.3.1.dta	3345.36	1284.62	3	YKJNSDISSTR	-	2060.76	5-4-0-0-3	3,	1	0.11215	1	0.08881	0.12387	3.19058	0.39521	y5+;Y1+;	y5+;Y1+;	No
MS2.16091.16091.3.0.dta	3344.36	1284.62	3	YKJNSDISSTR	-	2059.73	5-4-1-0-1	3,	1	0.11215	1	0.08881	0.12387	3.19058	0.39521	y5+;Y1+;	y5+;Y1+;	No
MS2.29739.29739.4.1.dta	4722.14	2679.39	4	MVSHHJLTTGATLINEQWLLTTAK	-	2042.72	4-4-2-0-0	6,	1	0.00673	5	0.11194	0.10236	3.85904	0.39503	y2+;y3+;y4+;y5+;y6+;Y1++;	y4+;y5+;y6+;	No
MS2.5244.5244.3.0.dta	3604.43	1284.62	3	YKJNSDISSTR	-	2319.84	5-6-1-0-0	3,	0	0	4	0.10338	0.12373	3.19058	0.39477	y1+;y3+;y5+;y7+;	y5+;y7+;	No
MS2.40247.40247.4.1.dta	4630.08	3413.63	4	SLGNVJFTVSAEALESQELCGTEVPSVPEHGR	20,Carbamidomethyl[C];	1216.42	5-2-0-0-0	6,	0	0	2	0.23238	0.13002	3.03379	0.39445	y5+;y8+;	y5+;y8+;	No
MS2.17649.17649.3.0.dta	3344.35	1284.62	3	YKJNSDISSTR	-	2059.73	5-4-1-0-1	3,	1	0.12553	1	0.07779	0.12346	3.19058	0.39392	y5+;Y1+;	y5+;Y1+;	No
MS2.17649.17649.3.1.dta	3345.36	1284.62	3	YKJNSDISSTR	-	2060.76	5-4-0-0-3	3,	1	0.12553	1	0.07779	0.12346	3.19058	0.39392	y5+;Y1+;	y5+;Y1+;	No
MS2.24908.24908.3.0.dta	3345.36	1284.62	3	YKJNSDISSTR	-	2060.76	5-4-0-0-3	3,	2	0.06151	2	0.07546	0.12276	3.19058	0.39168	y1+;y5+;Y0+;Y1+;	y5+;Y1+;	No
MS2.32538.32538.5.1.dta	5598.45	2679.39	5	MVSHHJLTTGATLINEQWLLTTAK	-	2919.04	6-6-2-0-1	6,	0	0	7	0.11757	0.12816	3.05561	0.3916	y3+;y4+;y5+;y6+;y7+;y10+;y11+;	y4+;y6+;	No
MS2.35067.35067.4.1.dta	5252.36	3541.72	4	SLGNVJFTVSAEALESQELCGTEVPSVPEHGRK	20,Carbamidomethyl[C];	1710.6	5-3-1-0-0	6,	0	0	4	0.17618	0.12323	3.17655	0.39144	b2+;b5+;y6+;y9+;	y6+;y9+;	No
MS2.24719.24719.4.1.dta	4151.74	1581.83	4	FTPJKTEDTIFLR	-	2569.9	6-5-2-0-0	4,	1	0.11362	2	0.07633	0.1235	3.15914	0.39016	y1+;y5+;Y1+;	y5+;Y1+;	Yes	3	1	1
MS2.24719.24719.4.3.dta	4152.74	1581.83	4	FTPJKTEDTIFLR	-	2570.93	6-5-1-0-2	4,	1	0.11362	2	0.07633	0.1235	3.15914	0.39016	y1+;y5+;Y1+;	y5+;Y1+;	No
MS2.35568.35568.6.2.dta	5080.37	2963.6	6	LSLHRPALEDLLLGSEAJLTCTLTGLR	21,Carbamidomethyl[C];	2116.76	5-5-1-0-0	18,	0	0	7	0.11124	0.12669	3.05003	0.3864	b2+;b5+;b10+;b11+;y1+;y4+;y7+;	b10+;y1+;	No
MS2.26366.26366.4.2.dta	4780.91	2339.08	4	GLTFQQJASSMCVPDQDTAIR	12,Carbamidomethyl[C];	2441.88	7-5-0-0-2	7,	0	0	2	0.15558	0.12675	3.03913	0.38521	y4+;y8+;	y4+;y8+;	No
MS2.23623.23623.3.0.dta	4124.73	2381.1	3	STGKPTLYJVSLVMSDTAGTCY	14,Oxidation[M];21,Carbamidomethyl[C];	1743.61	7-3-0-0-0	9,	0	0	13	0.21114	0.18728	2.04906	0.38376	b4+;b5+;b7+;b8+;b9+;b10+;b11+;b12+;b13+;y1+;y2+;y4+;y5+;	y2+;	No
MS2.28094.28094.3.1.dta	4463.87	1891.96	3	FYFTPJKTEDTIFLR	-	2571.95	6-5-0-0-4	6,	0	0	4	0.15379	0.12546	3.05561	0.38337	b2+;y1+;y5+;y8+;	y1+;y5+;	No
MS2.29926.29926.3.0.dta	3597.55	2381.1	3	STGKPTLYJVSLVMSDTAGTCY	14,Oxidation[M];21,Carbamidomethyl[C];	1216.42	5-2-0-0-0	9,	0	0	7	0.09918	0.09997	3.82685	0.38257	b4+;b7+;b8+;b9+;b10+;b12+;b13+;	b7+;b8+;b10+;	No
MS2.28505.28505.3.1.dta	4697.97	1744.89	3	YFTPJKTEDTIFLR	-	2953.07	8-6-0-0-3	5,	1	0.09272	2	0.11389	0.1248	3.05003	0.38064	y1+;y5+;Y1+;	y5+;Y1+;	No
MS2.28505.28505.3.0.dta	4696.95	1744.89	3	YFTPJKTEDTIFLR	-	2952.05	8-6-1-0-1	5,	1	0.09272	2	0.11389	0.1248	3.05003	0.38064	y1+;y5+;Y1+;	y5+;Y1+;	No
MS2.5394.5394.3.2.dta	3200.3	993.46	3	JNSDISSTR	-	2206.81	5-4-0-0-4	1,	0	0	2	0.12611	0.11801	3.22517	0.3806	y5+;y7+;	y5+;y7+;	No
MS2.30024.30024.5.0.dta	4605.91	1744.89	5	YFTPJKTEDTIFLR	-	2861	6-5-3-0-0	5,	2	0.13226	1	0.02717	0.09843	3.85241	0.37919	y5+;Y1+;Y1++;	y5+;Y1+;Y1++;	No
MS2.18178.18178.3.0.dta	3560.39	916.456	3	FYFTPJK	-	2643.94	7-6-1-0-0	6,	1	0.0959	1	0.05731	0.11611	3.26366	0.37893	y3+;Y1+;	y3+;Y1+;	No
MS2.18178.18178.3.2.dta	3561.4	916.456	3	FYFTPJK	-	2644.96	7-6-0-0-2	6,	1	0.0959	1	0.05731	0.11611	3.26366	0.37893	y3+;Y1+;	y3+;Y1+;	No
MS2.11384.11384.3.2.dta	3345.36	1284.6	3	MVSHHJLTTGAT	1,Oxidation[M];	2060.76	5-4-0-0-3	6,	1	0.11527	1	0.08266	0.11936	3.1745	0.37892	y6+;Y1+;	y6+;Y1+;	No
MS2.11384.11384.3.1.dta	3344.36	1284.6	3	MVSHHJLTTGAT	1,Oxidation[M];	2059.73	5-4-1-0-1	6,	1	0.11527	1	0.08266	0.11936	3.1745	0.37892	y6+;Y1+;	y6+;Y1+;	No
MS2.30402.30402.4.1.dta	4323.85	1753.93	4	CANLVPVPITJATLDR	1,Carbamidomethyl[C];	2569.9	6-5-2-0-0	11,	1	0.02147	5	0.11491	0.12066	3.13729	0.37854	b2+;b3+;b4+;y1+;y11+;Y1+;	b3+;b4+;	No
MS2.29617.29617.4.1.dta	4256.78	2052	4	MVSHHJLTTGATLINEQW	-	2204.77	5-4-2-0-0	6,	3	0.01473	15	0.0697	0.18304	2.05687	0.37648	b4+;b5+;b7+;b8+;b11+;b12+;b13+;b14+;b17+;y2+;y3+;y4+;y5+;y12+;y13+;Y0++;Y0++;Y1++;	y2+;	Yes	3	1	1
MS2.8277.8277.3.1.dta	3291.29	1189.51	3	EEQYJSTYR	-	2101.78	4-5-0-0-3	5,	4	0.18445	3	0.03819	0.17107	2.19368	0.37527	y1+;y2+;y4+;Y0+;Y0+;Y1+;Y1+;	Y1+;	No
MS2.8277.8277.3.0.dta	3290.28	1189.51	3	EEQYJSTYR	-	2100.76	4-5-1-0-1	5,	4	0.18445	3	0.03819	0.17107	2.19368	0.37527	y1+;y2+;y4+;Y0+;Y0+;Y1+;Y1+;	Y1+;	Yes	3	1	1
MS2.38056.38056.4.1.dta	4833.12	3413.63	4	SLGNVJFTVSAEALESQELCGTEVPSVPEHGR	20,Carbamidomethyl[C];	1419.5	5-3-0-0-0	6,	0	0	2	0.21537	0.12365	3.03379	0.37513	y5+;y8+;	y5+;y8+;	No
MS2.13161.13161.3.0.dta	2979.24	1284.62	3	YKJNSDISSTR	-	1694.6	4-3-1-0-1	3,	1	0.15319	1	0.04645	0.11749	3.19058	0.37487	y5+;Y1+;	y5+;Y1+;	No
MS2.6913.6913.3.1.dta	3302.3	1096.52	3	MVSHHJLTTG	-	2205.79	5-4-1-0-2	6,	2	0.10699	2	0.05432	0.11659	3.20744	0.37396	b5+;b6+;Y0+;Y1+;	b5+;Y1+;	No
MS2.6913.6913.3.0.dta	3301.31	1096.52	3	MVSHHJLTTG	-	2204.77	5-4-2-0-0	6,	2	0.10699	2	0.05432	0.11659	3.20744	0.37396	b5+;b6+;Y0+;Y1+;	b5+;Y1+;	No
MS2.27775.27775.4.0.dta	4988.05	1744.89	4	YFTPJKTEDTIFLR	-	3243.15	8-6-2-0-1	5,	2	0.07444	3	0.06197	0.12257	3.05003	0.37384	y5+;y6+;y8+;Y1+;Y1++;	y5+;Y1+;	No
MS2.27775.27775.4.1.dta	4989.07	1744.89	4	YFTPJKTEDTIFLR	-	3244.17	8-6-1-0-3	5,	2	0.07444	3	0.06197	0.12257	3.05003	0.37384	y5+;y6+;y8+;Y1+;Y1++;	y5+;Y1+;	No
MS2.15435.15435.3.2.dta	3345.36	1284.62	3	YKJNSDISSTR	-	2060.76	5-4-0-0-3	3,	2	0.10191	2	0.03672	0.1171	3.19058	0.37363	y1+;y5+;Y0+;Y1+;	Y0+;Y1+;	No
MS2.26749.26749.4.1.dta	4141.82	1408.82	4	LVPVPITJATLDR	-	2732.98	7-5-1-0-2	8,	4	0.12143	6	0.04095	0.17399	2.14519	0.37324	b3+;y1+;y4+;y5+;y9+;y11+;Y0+;Y1+;Y2+;Y3+;	Y1+;	Yes	1	1	1
MS2.17256.17256.3.2.dta	3548.45	1284.62	3	YKJNSDISSTR	-	2263.83	5-5-0-0-3	3,	1	0.05465	1	0.12105	0.11697	3.19058	0.3732	y5+;Y1+;	y5+;Y1+;	No
MS2.17256.17256.3.1.dta	3547.45	1284.62	3	YKJNSDISSTR	-	2262.81	5-5-1-0-1	3,	1	0.05465	1	0.12105	0.11697	3.19058	0.3732	y5+;Y1+;	y5+;Y1+;	No
MS2.6998.6998.3.0.dta	3547.44	1284.62	3	YKJNSDISSTR	-	2262.81	5-5-1-0-1	3,	1	0.02493	2	0.09765	0.11652	3.19058	0.37175	y5+;y7+;Y1+;	y5+;Y1+;	Yes	3	1	1
MS2.38277.38277.5.0.dta	5287.31	3413.63	5	SLGNVJFTVSAEALESQELCGTEVPSVPEHGR	20,Carbamidomethyl[C];	1873.67	6-3-0-0-2	6,	0	0	2	0.22036	0.1223	3.03379	0.37105	y5+;y8+;	y5+;y8+;	No
MS2.32549.32549.3.1.dta	3214.33	1008.54	3	VSJQTLSLF	-	2205.79	5-4-1-0-2	3,	0	0	5	0.08751	0.11474	3.22517	0.37007	b4+;b5+;b6+;b8+;y5+;	b4+;b6+;	No
MS2.32549.32549.3.0.dta	3213.33	1008.54	3	VSJQTLSLF	-	2204.77	5-4-2-0-0	3,	0	0	5	0.08751	0.11474	3.22517	0.37007	b4+;b5+;b6+;b8+;y5+;	b4+;b6+;	No
MS2.38474.38474.4.1.dta	5327.32	3413.63	4	SLGNVJFTVSAEALESQELCGTEVPSVPEHGR	20,Carbamidomethyl[C];	1913.68	5-4-1-0-0	6,	0	0	2	0.22445	0.1219	3.03379	0.36981	y5+;y8+;	y5+;y8+;	No
MS2.25073.25073.4.0.dta	3850.72	1408.82	4	LVPVPITJATLDR	-	2441.88	7-5-0-0-2	8,	3	0.17306	4	0.06423	0.17232	2.14519	0.36966	b3+;y1+;y4+;y9+;Y1+;Y2+;Y3+;	Y1+;	Yes	1	1	1
MS2.31726.31726.3.0.dta	4365.93	1795.01	3	VVLHPJYSQVDIGLIK	-	2570.93	6-5-1-0-2	6,	0	0	4	0.15495	0.12137	3.04454	0.36951	b4+;y2+;y4+;y5+;	b4+;y5+;	No
MS2.15622.15622.3.0.dta	3373.4	1458.73	3	NLFLJHSEJATAK	-	1914.7	5-4-0-0-2	9,	2	0.01436	9	0.11039	0.17223	2.14519	0.36947	b2+;b3+;b4+;b6+;b7+;y1+;y2+;y3+;y4+;Y0+;Y1+;	b3+;	No
MS2.3880.3880.3.0.dta	3874.53	776.39	3	EJGTISR	-	3098.11	8-6-1-0-2	2,	6	0.12026	2	0.01955	0.16605	2.22193	0.36895	b2+;y1+;Y0+;Y0+;Y1+;Y2+;Y3+;Y4+;	Y2+;	No
MS2.3880.3880.3.1.dta	3875.53	776.39	3	EJGTISR	-	3099.13	8-6-0-0-4	2,	6	0.12026	2	0.01955	0.16605	2.22193	0.36895	b2+;y1+;Y0+;Y0+;Y1+;Y2+;Y3+;Y4+;	Y2+;	No
MS2.31538.31538.4.1.dta	4748.08	1795.01	4	VVLHPJYSQVDIGLIK	-	2953.07	8-6-0-0-3	6,	0	0	5	0.12887	0.12054	3.04454	0.36698	b4+;y2+;y4+;y5+;y6+;	b4+;y5+;	No
MS2.9322.9322.3.0.dta	2979.23	1284.62	3	YKJNSDISSTR	-	1694.6	4-3-1-0-1	3,	1	0.14885	1	0.04442	0.11499	3.19058	0.36688	y5+;Y1+;	y5+;Y1+;	No
MS2.32073.32073.4.1.dta	4958.24	2679.39	4	MVSHHJLTTGATLINEQWLLTTAK	-	2278.81	6-5-1-0-0	6,	0	0	6	0.147	0.11927	3.05561	0.36443	b5+;y1+;y3+;y4+;y5+;y6+;	y4+;y5+;	No
MS2.32073.32073.4.2.dta	4959.23	2679.39	4	MVSHHJLTTGATLINEQWLLTTAK	-	2279.83	6-5-0-0-2	6,	0	0	6	0.147	0.11927	3.05561	0.36443	b5+;y1+;y3+;y4+;y5+;y6+;	y4+;y5+;	No
MS2.32598.32598.4.0.dta	4630.06	3413.63	4	SLGNVJFTVSAEALESQELCGTEVPSVPEHGR	20,Carbamidomethyl[C];	1216.42	5-2-0-0-0	6,	0	0	3	0.17315	0.11988	3.03379	0.3637	y5+;y8+;y9+;	y5+;y8+;	No
MS2.25324.25324.4.1.dta	3704.66	1408.82	4	LVPVPITJATLDR	-	2295.82	7-5-0-0-1	8,	4	0.15751	4	0.0502	0.1695	2.14519	0.3636	b3+;y1+;y4+;y9+;Y1+;Y1+;Y2+;Y3+;	Y1+;	Yes	1	1	1
MS2.27011.27011.4.0.dta	3995.76	1408.82	4	LVPVPITJATLDR	-	2586.92	7-5-1-0-1	8,	5	0.12842	5	0.03731	0.16934	2.14519	0.36327	b3+;y1+;y4+;y5+;y11+;Y0+;Y1+;Y1+;Y2+;Y3+;	Y1+;	Yes	1	1	1
MS2.34328.34328.3.1.dta	4192.87	2278.16	3	MVSHHJLTTGATLINEQWLL	-	1914.7	5-4-0-0-2	6,	0	0	8	0.11135	0.11973	3.03379	0.36325	b4+;b5+;b6+;b7+;b8+;b11+;b12+;y3+;	b5+;b6+;	No
MS2.34328.34328.3.0.dta	4191.87	2278.16	3	MVSHHJLTTGATLINEQWLL	-	1913.68	5-4-1-0-0	6,	0	0	8	0.11135	0.11973	3.03379	0.36325	b4+;b5+;b6+;b7+;b8+;b11+;b12+;y3+;	b5+;b6+;	Yes	2	1	1
MS2.32498.32498.4.0.dta	4651.11	2679.39	4	MVSHHJLTTGATLINEQWLLTTAK	-	1971.72	5-5-0-0-1	6,	0	0	4	0.15572	0.1186	3.05561	0.36239	y2+;y4+;y5+;y10+;	y4+;y5+;	No
MS2.34452.34452.4.3.dta	5456.42	3541.72	4	SLGNVJFTVSAEALESQELCGTEVPSVPEHGRK	20,Carbamidomethyl[C];	1914.7	5-4-0-0-2	6,	0	0	2	0.21208	0.11918	3.03913	0.3622	y6+;y9+;	y6+;y9+;	No
MS2.34452.34452.4.1.dta	5455.42	3541.72	4	SLGNVJFTVSAEALESQELCGTEVPSVPEHGRK	20,Carbamidomethyl[C];	1913.68	5-4-1-0-0	6,	0	0	2	0.21208	0.11918	3.03913	0.3622	y6+;y9+;	y6+;y9+;	No
MS2.4201.4201.3.1.dta	2842.1	993.46	3	JNSDISSTR	-	1848.64	8-2-0-0-1	1,	1	0.0247	2	0.08963	0.11175	3.22517	0.36043	y1+;y5+;Y1+;	y5+;Y1+;	No
MS2.25602.25602.3.2.dta	3492.52	1593.83	3	SIJTTNVMGTSLTVR	-	1898.7	4-4-0-0-3	3,	1	0.05363	2	0.08047	0.0912	3.94791	0.36005	y1+;y8+;Y1+;	y1+;y8+;Y1+;	No
MS2.33809.33809.4.1.dta	5007.19	3213.51	4	GNVJFTVSAEALESQELCGTEVPSVPEHGR	18,Carbamidomethyl[C];	1793.67	3-5-0-0-2	4,	0	0	2	0.17794	0.11785	3.03379	0.35754	y5+;y8+;	y5+;y8+;	No
MS2.24534.24534.3.0.dta	4550.89	2200.07	3	LAGKPTHVJVSVVMAEVDGTC	14,Oxidation[M];21,Carbamidomethyl[C];	2350.83	5-4-2-0-1	9,	3	0.0643	5	0.09516	0.11821	3.02335	0.35738	b7+;b8+;y3+;y5+;y8+;Y0++;Y1++;Y1++;	b8+;Y1++;	Yes	1	1	1
MS2.37891.37891.4.2.dta	5415.38	3541.72	4	SLGNVJFTVSAEALESQELCGTEVPSVPEHGRK	20,Carbamidomethyl[C];	1873.67	6-3-0-0-2	6,	0	0	2	0.20728	0.11733	3.03913	0.35657	y6+;y9+;	y6+;y9+;	No
MS2.37891.37891.4.4.dta	5414.39	3541.72	4	SLGNVJFTVSAEALESQELCGTEVPSVPEHGRK	20,Carbamidomethyl[C];	1872.65	6-3-1-0-0	6,	0	0	2	0.20728	0.11733	3.03913	0.35657	y6+;y9+;	y6+;y9+;	No
MS2.39829.39829.4.0.dta	5124.27	3413.63	4	SLGNVJFTVSAEALESQELCGTEVPSVPEHGR	20,Carbamidomethyl[C];	1710.6	5-3-1-0-0	6,	0	0	2	0.2002	0.11739	3.03379	0.35614	y5+;y8+;	y5+;y8+;	No
MS2.39829.39829.4.1.dta	5125.27	3413.63	4	SLGNVJFTVSAEALESQELCGTEVPSVPEHGR	20,Carbamidomethyl[C];	1711.62	5-3-0-0-2	6,	0	0	2	0.2002	0.11739	3.03379	0.35614	y5+;y8+;	y5+;y8+;	No
MS2.34399.34399.3.0.dta	4340.88	1753.93	3	CANLVPVPITJATLDR	1,Carbamidomethyl[C];	2586.92	7-5-1-0-1	11,	2	0.04389	6	0.05259	0.11348	3.13729	0.35602	y1+;y2+;y3+;y4+;y5+;y11+;Y0+;Y1+;	y1+;Y1+;	No
MS2.14642.14642.4.1.dta	5594.23	1458.73	4	NLFLJHSEJATAK	-	4135.46	11-8-2-0-1	5,	8	0.12272	1	0.00648	0.11678	3.04454	0.35554	b3+;Y0+;Y1+;Y1+;Y2+;Y1++;Y1++;Y2++;Y2++;	Y1++;Y2++;	No
MS2.34257.34257.3.1.dta	4208.88	2278.16	3	MVSHHJLTTGATLINEQWLL	-	1930.69	6-4-0-0-1	6,	0	0	7	0.09515	0.11659	3.03379	0.3537	b4+;b5+;b6+;b7+;b11+;b14+;b15+;	b5+;b7+;	Yes	2	1	1
MS2.25890.25890.3.1.dta	4244.83	2184.08	3	LAGKPTHVJVSVVMAEVDGTC	21,Carbamidomethyl[C];	2060.76	5-4-0-0-3	9,	0	0	3	0.12856	0.09254	3.82069	0.35357	b8+;y4+;y5+;	b8+;y4+;y5+;	No
MS2.25890.25890.3.0.dta	4243.82	2184.08	3	LAGKPTHVJVSVVMAEVDGTC	21,Carbamidomethyl[C];	2059.73	5-4-1-0-1	9,	0	0	3	0.12856	0.09254	3.82069	0.35357	b8+;y4+;y5+;	b8+;y4+;y5+;	No
MS2.34466.34466.4.2.dta	5293.34	3541.72	4	SLGNVJFTVSAEALESQELCGTEVPSVPEHGRK	20,Carbamidomethyl[C];	1751.62	4-4-1-0-0	6,	0	0	3	0.17738	0.11582	3.03913	0.35199	y4+;y6+;y9+;	y6+;y9+;	No
MS2.10093.10093.3.0.dta	3344.37	1284.62	3	YKJNSDISSTR	-	2059.73	5-4-1-0-1	3,	2	0.09129	1	0.05361	0.1103	3.19058	0.35191	y5+;Y0+;Y1+;	y5+;Y1+;	No
MS2.10093.10093.3.1.dta	3345.36	1284.62	3	YKJNSDISSTR	-	2060.76	5-4-0-0-3	3,	2	0.09129	1	0.05361	0.1103	3.19058	0.35191	y5+;Y0+;Y1+;	y5+;Y1+;	No
MS2.6814.6814.3.0.dta	3344.36	1284.62	3	YKJNSDISSTR	-	2059.73	5-4-1-0-1	3,	1	0.06759	2	0.06606	0.1095	3.19058	0.34938	y1+;y5+;Y1+;	y5+;Y1+;	No
MS2.25729.25729.4.0.dta	4824.99	1581.83	4	FTPJKTEDTIFLR	-	3243.15	8-6-2-0-1	4,	1	0.03633	3	0.08379	0.11059	3.15914	0.34937	y5+;y7+;y8+;Y1+;	y5+;Y1+;	No
MS2.25729.25729.4.2.dta	4825.99	1581.83	4	FTPJKTEDTIFLR	-	3244.17	8-6-1-0-3	4,	1	0.03633	3	0.08379	0.11059	3.15914	0.34937	y5+;y7+;y8+;Y1+;	y5+;Y1+;	No
MS2.26414.26414.3.0.dta	4141.8	1408.82	3	LVPVPITJATLDR	-	2732.98	7-5-1-0-2	8,	1	0.12006	2	0.06779	0.1103	3.15914	0.34847	y1+;y2+;Y1+;	y2+;Y1+;	Yes	3	1	1
MS2.8798.8798.3.1.dta	3345.37	1284.62	3	YKJNSDISSTR	-	2060.76	5-4-0-0-3	3,	1	0.09295	1	0.07125	0.10915	3.19058	0.34825	y5+;Y1+;	y5+;Y1+;	No
MS2.8798.8798.3.0.dta	3344.37	1284.62	3	YKJNSDISSTR	-	2059.73	5-4-1-0-1	3,	1	0.09295	1	0.07125	0.10915	3.19058	0.34825	y5+;Y1+;	y5+;Y1+;	Yes	3	1	1
MS2.26799.26799.3.1.dta	4206.8	1408.82	3	LVPVPITJATLDR	-	2798.02	4-7-2-0-1	8,	2	0.07212	3	0.05947	0.11017	3.15914	0.34803	b3+;y1+;y5+;Y1+;Y2+;	y1+;Y1+;	No
MS2.9731.9731.2.1.dta	2691.09	1189.51	2	EEQYJSTYR	-	1501.56	3-5-0-0-0	5,	1	0.1073	2	0.06006	0.10787	3.22517	0.34789	y1+;y2+;Y2+;	y1+;Y2+;	No
MS2.37993.37993.4.0.dta	4920.2	3541.72	4	SLGNVJFTVSAEALESQELCGTEVPSVPEHGRK	20,Carbamidomethyl[C];	1378.48	6-2-0-0-0	6,	0	0	2	0.19922	0.11431	3.03913	0.34739	y6+;y9+;	y6+;y9+;	No
MS2.24083.24083.3.0.dta	4124.72	2381.1	3	STGKPTLYJVSLVMSDTAGTCY	14,Oxidation[M];21,Carbamidomethyl[C];	1743.61	7-3-0-0-0	9,	0	0	3	0.16478	0.09056	3.82685	0.34655	b10+;b13+;y2+;	b10+;b13+;y2+;	No
MS2.34386.34386.4.3.dta	5166.28	3413.63	4	SLGNVJFTVSAEALESQELCGTEVPSVPEHGR	20,Carbamidomethyl[C];	1752.64	4-4-0-0-2	6,	0	0	2	0.19424	0.11406	3.03379	0.34604	y5+;y8+;	y5+;y8+;	No
MS2.34386.34386.4.1.dta	5165.29	3413.63	4	SLGNVJFTVSAEALESQELCGTEVPSVPEHGR	20,Carbamidomethyl[C];	1751.62	4-4-1-0-0	6,	0	0	2	0.19424	0.11406	3.03379	0.34604	y5+;y8+;	y5+;y8+;	No
MS2.32721.32721.4.2.dta	4865.97	1581.83	4	FTPJKTEDTIFLR	-	3284.17	7-7-2-0-1	4,	0	0	8	0.12422	0.16106	2.14519	0.3455	b2+;y1+;y3+;y4+;y5+;y6+;y7+;y8+;	y5+;	No
MS2.11600.11600.3.0.dta	4703.92	1458.73	3	NLFLJHSEJATAK	-	3245.19	8-6-0-0-5	5,	2	0.09841	1	0.04609	0.08973	3.84588	0.34509	b3+;Y1+;Y2++;	b3+;Y1+;Y2++;	No
MS2.15212.15212.3.2.dta	3367.4	958.557	3	TPLTAJITK	-	2408.87	5-5-1-0-2	6,	1	0.15384	1	0.03685	0.10691	3.22517	0.34482	y5+;Y2+;	y5+;Y2+;	No
MS2.25322.25322.4.1.dta	4550.92	2200.07	4	LAGKPTHVJVSVVMAEVDGTC	14,Oxidation[M];21,Carbamidomethyl[C];	2350.83	5-4-2-0-1	9,	1	0.01114	15	0.11937	0.16855	2.04524	0.34473	b4+;b6+;b7+;b8+;b9+;b10+;b13+;y2+;y3+;y4+;y5+;y6+;y7+;y8+;y9+;Y1++;	b8+;	No
MS2.30376.30376.3.0.dta	4469.88	1753.93	3	CANLVPVPITJATLDR	1,Carbamidomethyl[C];	2715.96	6-5-2-0-1	11,	0	0	3	0.18246	0.10918	3.13729	0.34254	b2+;b3+;b4+;	b2+;b3+;	No
MS2.4304.4304.4.0.dta	4293.63	993.46	4	JNSDISSTR	-	3300.17	8-7-2-0-0	1,	2	0.04003	2	0.04592	0.10578	3.22517	0.34117	y4+;y5+;Y0+;Y1+;	y5+;Y1+;	No
MS2.17170.17170.4.0.dta	4212.83	2184.08	4	LAGKPTHVJVSVVMAEVDGTC	21,Carbamidomethyl[C];	2028.74	5-6-0-0-0	9,	0	0	5	0.15983	0.11279	3.02335	0.34099	b4+;b7+;b8+;y1+;y2+;	b8+;y1+;	No
MS2.7994.7994.3.0.dta	3344.38	1284.62	3	YKJNSDISSTR	-	2059.73	5-4-1-0-1	3,	2	0.08262	1	0.0544	0.10677	3.19058	0.34066	y5+;Y0+;Y1+;	y5+;Y1+;	No
MS2.3558.3558.4.0.dta	3830.49	1284.62	4	YKJNSDISSTR	-	2545.89	8-4-1-0-1	3,	1	0.17939	1	0.04352	0.11078	3.06703	0.33978	y9+;Y4++;	y9+;Y4++;	No
MS2.27637.27637.3.0.dta	4679.94	1744.89	3	YFTPJKTEDTIFLR	-	2935.04	7-6-2-0-0	5,	0	0	3	0.13141	0.11041	3.05003	0.33676	b2+;y5+;y8+;	y5+;y8+;	No
MS2.34755.34755.4.2.dta	5414.39	3541.72	4	SLGNVJFTVSAEALESQELCGTEVPSVPEHGRK	20,Carbamidomethyl[C];	1872.65	6-3-1-0-0	6,	0	0	3	0.15175	0.10442	3.22139	0.33637	y4+;y6+;y9+;	y6+;y9+;	No
MS2.12930.12930.3.1.dta	3345.36	1284.62	3	YKJNSDISSTR	-	2060.76	5-4-0-0-3	3,	1	0.13896	1	0.03262	0.10522	3.19058	0.33572	y5+;Y1+;	y5+;Y1+;	No
MS2.12930.12930.3.0.dta	3344.36	1284.62	3	YKJNSDISSTR	-	2059.73	5-4-1-0-1	3,	1	0.13896	1	0.03262	0.10522	3.19058	0.33572	y5+;Y1+;	y5+;Y1+;	Yes	3	1	1
MS2.18901.18901.4.2.dta	4329.92	2067.09	4	TCTAAHPELKTPLTAJITK	2,Carbamidomethyl[C];	2262.81	5-5-1-0-1	16,	2	0.08114	2	0.08587	0.11032	3.02854	0.33412	b6+;b10+;Y0++;Y1++;	b6+;Y1++;	Yes	3	1	1
MS2.18901.18901.4.1.dta	4330.92	2067.09	4	TCTAAHPELKTPLTAJITK	2,Carbamidomethyl[C];	2263.83	5-5-0-0-3	16,	2	0.08114	2	0.08587	0.11032	3.02854	0.33412	b6+;b10+;Y0++;Y1++;	b6+;Y1++;	No
MS2.10030.10030.4.2.dta	4012.55	769.388	4	YFTPJK	-	3243.15	8-6-2-0-1	5,	2	0.06513	1	0.01699	0.10168	3.2847	0.33397	y3+;Y0+;Y1+;	Y0+;Y1+;	No
MS2.39370.39370.4.1.dta	5327.32	3413.63	4	SLGNVJFTVSAEALESQELCGTEVPSVPEHGR	20,Carbamidomethyl[C];	1913.68	5-4-1-0-0	6,	0	0	2	0.1821	0.10876	3.06356	0.3332	y5+;y8+;	y5+;y8+;	No
MS2.31985.31985.4.1.dta	4534.94	1891.96	4	FYFTPJKTEDTIFLR	-	2642.95	5-4-2-0-3	6,	1	0.02623	5	0.05647	0.10897	3.05561	0.33298	b2+;b3+;y5+;y6+;y8+;Y1++;	y5+;Y1++;	No
MS2.33110.33110.6.1.dta	5415.41	3541.72	6	SLGNVJFTVSAEALESQELCGTEVPSVPEHGRK	20,Carbamidomethyl[C];	1873.67	6-3-0-0-2	6,	0	0	3	0.13247	0.09745	3.40994	0.33229	y4+;y6+;y9+;	y6+;y9+;	No
MS2.35275.35275.4.4.dta	5123.28	3541.72	4	SLGNVJFTVSAEALESQELCGTEVPSVPEHGRK	20,Carbamidomethyl[C];	1581.56	6-3-0-0-0	6,	0	0	5	0.11975	0.10852	3.03913	0.32982	b2+;b4+;b7+;y6+;y9+;	y6+;y9+;	No
MS2.22913.22913.3.4.dta	3345.36	1284.62	3	YKJNSDISSTR	-	2060.76	5-4-0-0-3	3,	2	0.0634	2	0.03763	0.10129	3.24989	0.32918	y1+;y5+;Y0+;Y1+;	y5+;Y1+;	No
MS2.22913.22913.3.3.dta	3344.37	1284.62	3	YKJNSDISSTR	-	2059.73	5-4-1-0-1	3,	2	0.0634	2	0.03763	0.10129	3.24989	0.32918	y1+;y5+;Y0+;Y1+;	y5+;Y1+;	No
MS2.8278.8278.3.1.dta	3120.23	1189.51	3	EEQYJSTYR	-	1930.69	6-4-0-0-1	5,	6	0.08635	4	0.03028	0.14983	2.19368	0.32868	y1+;y2+;y3+;y4+;Y0+;Y0+;Y1+;Y1+;Y2+;Y4+;	Y1+;	No
MS2.14778.14778.3.0.dta	3895.61	958.557	3	TPLTAJITK	-	2937.08	7-6-0-0-4	6,	1	0.15517	1	0.02636	0.10188	3.22517	0.32858	y5+;Y2+;	y5+;Y2+;	No
MS2.27350.27350.3.0.dta	4602.9	2339.08	3	GLTFQQJASSMCVPDQDTAIR	12,Carbamidomethyl[C];	2263.83	5-5-0-0-3	7,	0	0	2	0.12957	0.1081	3.03913	0.32852	y6+;y8+;	y6+;y8+;	No
MS2.30230.30230.3.0.dta	4623.92	1744.89	3	YFTPJKTEDTIFLR	-	2879.04	7-5-1-0-3	5,	2	0.05237	3	0.06961	0.10758	3.05003	0.32813	y1+;y3+;y5+;Y1+;Y0++;	y5+;Y1+;	No
MS2.34316.34316.4.2.dta	4792.12	3413.63	4	SLGNVJFTVSAEALESQELCGTEVPSVPEHGR	20,Carbamidomethyl[C];	1378.48	6-2-0-0-0	6,	0	0	2	0.17486	0.10739	3.03379	0.32581	y5+;y8+;	y5+;y8+;	No
MS2.11198.11198.3.2.dta	3547.44	1284.62	3	YKJNSDISSTR	-	2262.81	5-5-1-0-1	3,	1	0.06025	1	0.08121	0.1018	3.19058	0.32481	y5+;Y1+;	y5+;Y1+;	No
MS2.29429.29429.3.2.dta	4348.92	1795.01	3	VVLHPJYSQVDIGLIK	-	2553.91	5-5-2-0-1	6,	3	0.03401	6	0.10696	0.1575	2.06085	0.32458	b2+;b4+;b11+;y4+;y5+;y9+;Y0+;Y1+;Y1++;	b4+;	Yes	1	1	1
MS2.3658.3658.3.2.dta	2858.11	952.448	3	RNEEYJK	-	1905.66	8-3-0-0-0	6,	0	0	4	0.17125	0.14555	2.22193	0.32341	y2+;y3+;y4+;y6+;	y6+;	No
MS2.9546.9546.3.0.dta	3547.46	1284.62	3	YKJNSDISSTR	-	2262.81	5-5-1-0-1	3,	1	0.06718	1	0.07456	0.10136	3.19058	0.32339	y5+;Y1+;	y5+;Y1+;	No
MS2.9546.9546.3.1.dta	3548.45	1284.62	3	YKJNSDISSTR	-	2263.83	5-5-0-0-3	3,	1	0.06718	1	0.07456	0.10136	3.19058	0.32339	y5+;Y1+;	y5+;Y1+;	No
MS2.17662.17662.3.0.dta	2803.13	993.46	3	JNSDISSTR	-	1809.67	4-5-0-0-1	1,	1	0.15593	1	0.03208	0.10013	3.22517	0.32295	b6+;Y2+;	b6+;Y2+;	No
MS2.28786.28786.4.0.dta	4314.8	1744.89	4	YFTPJKTEDTIFLR	-	2569.9	6-5-2-0-0	5,	4	0.08826	2	0.02538	0.10586	3.05003	0.32287	y5+;y6+;Y1+;Y0++;Y1++;Y1++;	Y1+;Y1++;	No
MS2.28786.28786.4.2.dta	4315.8	1744.89	4	YFTPJKTEDTIFLR	-	2570.93	6-5-1-0-2	5,	4	0.08826	2	0.02538	0.10586	3.05003	0.32287	y5+;y6+;Y1+;Y0++;Y1++;Y1++;	Y1+;Y1++;	No
MS2.28786.28786.4.5.dta	4316.8	1744.89	4	YFTPJKTEDTIFLR	-	2571.95	6-5-0-0-4	5,	4	0.08826	2	0.02538	0.10586	3.05003	0.32287	y5+;y6+;Y1+;Y0++;Y1++;Y1++;	Y1+;Y1++;	No
MS2.34180.34180.3.0.dta	4641.05	1780.02	3	LVPVPITJATLDQITGK	-	2861	6-5-3-0-0	8,	0	0	4	0.09677	0.10276	3.1303	0.32168	y3+;y7+;y8+;y13+;	y7+;y13+;	Yes	3	1	1
MS2.34180.34180.3.1.dta	4642.06	1780.02	3	LVPVPITJATLDQITGK	-	2862.02	6-5-2-0-2	8,	0	0	4	0.09677	0.10276	3.1303	0.32168	y3+;y7+;y8+;y13+;	y7+;y13+;	No
MS2.28939.28939.4.1.dta	4439.96	1795.01	4	VVLHPJYSQVDIGLIK	-	2644.96	7-6-0-0-2	6,	2	0.05139	3	0.06793	0.1056	3.04454	0.3215	b4+;y4+;y5+;Y1++;Y2++;	y4+;Y1++;	No
MS2.28939.28939.4.3.dta	4437.94	1795.01	4	VVLHPJYSQVDIGLIK	-	2642.95	5-4-2-0-3	6,	2	0.05139	3	0.06793	0.1056	3.04454	0.3215	b4+;y4+;y5+;Y1++;Y2++;	y4+;Y1++;	No
MS2.37815.37815.3.1.dta	3345.38	1284.62	3	YKJNSDISSTR	-	2060.76	5-4-0-0-3	3,	1	0.1047	1	0.04572	0.10069	3.19058	0.32126	y5+;Y1+;	y5+;Y1+;	No
MS2.37815.37815.3.0.dta	3344.35	1284.62	3	YKJNSDISSTR	-	2059.73	5-4-1-0-1	3,	1	0.1047	1	0.04572	0.10069	3.19058	0.32126	y5+;Y1+;	y5+;Y1+;	No
MS2.29899.29899.4.1.dta	4594.07	2679.39	4	MVSHHJLTTGATLINEQWLLTTAK	-	1914.7	5-4-0-0-2	6,	0	0	4	0.13989	0.10474	3.05561	0.32005	b5+;b6+;y4+;y10+;	b5+;b6+;	No
MS2.17244.17244.4.0.dta	4009.75	2184.08	4	LAGKPTHVJVSVVMAEVDGTC	21,Carbamidomethyl[C];	1825.66	5-5-0-0-0	9,	0	0	3	0.18088	0.10585	3.02335	0.32002	b8+;y1+;y4+;	b8+;y1+;	No
MS2.8132.8132.3.1.dta	3547.44	1284.62	3	YKJNSDISSTR	-	2262.81	5-5-1-0-1	3,	1	0.04375	1	0.09171	0.10009	3.19058	0.31935	y5+;Y1+;	y5+;Y1+;	No
MS2.14827.14827.3.0.dta	2821.14	1157.52	3	EEQFJSTFR	-	1663.61	4-5-0-0-0	5,	2	0.08437	2	0.03065	0.09899	3.22517	0.31924	y1+;y4+;Y1+;Y2+;	y1+;Y2+;	No
MS2.35726.35726.5.1.dta	5620.4	3413.63	5	SLGNVJFTVSAEALESQELCGTEVPSVPEHGR	20,Carbamidomethyl[C];	2206.81	5-4-0-0-4	6,	0	0	2	0.17125	0.10503	3.03379	0.31863	y5+;y8+;	y5+;y8+;	No
MS2.16477.16477.3.0.dta	3269.32	916.456	3	FYFTPJK	-	2352.87	5-4-0-0-5	6,	1	0.04195	1	0.06261	0.09762	3.26366	0.31859	y3+;Y1+;	y3+;Y1+;	No
MS2.27689.27689.4.0.dta	4883.01	1581.83	4	FTPJKTEDTIFLR	-	3301.19	8-7-1-0-2	4,	0	0	3	0.11371	0.10072	3.15914	0.31817	y1+;y5+;y8+;	y5+;y8+;	No
MS2.27689.27689.4.1.dta	4884.02	1581.83	4	FTPJKTEDTIFLR	-	3302.21	8-7-0-0-4	4,	0	0	3	0.11371	0.10072	3.15914	0.31817	y1+;y5+;y8+;	y5+;y8+;	No
MS2.27689.27689.4.3.dta	4881.95	1581.83	4	FTPJKTEDTIFLR	-	3300.17	8-7-2-0-0	4,	0	0	3	0.11371	0.10072	3.15914	0.31817	y1+;y5+;y8+;	y5+;y8+;	No
MS2.27825.27825.3.1.dta	4518.89	1581.83	3	FTPJKTEDTIFLR	-	2937.08	7-6-0-0-4	4,	0	0	3	0.11208	0.10068	3.15914	0.31805	y1+;y5+;y8+;	y5+;y8+;	No
MS2.27825.27825.3.0.dta	4517.88	1581.83	3	FTPJKTEDTIFLR	-	2936.06	7-6-1-0-2	4,	0	0	3	0.11208	0.10068	3.15914	0.31805	y1+;y5+;y8+;	y5+;y8+;	No
MS2.33771.33771.4.2.dta	5137.16	1891.96	4	FYFTPJKTEDTIFLR	-	3245.19	8-6-0-0-5	6,	3	0.08471	2	0.04464	0.10401	3.05561	0.3178	b2+;y5+;Y0++;Y1++;Y2++;	y5+;Y1++;	No
MS2.17911.17911.3.0.dta	3344.36	1284.6	3	MVSHHJLTTGAT	1,Oxidation[M];	2059.73	5-4-1-0-1	6,	1	0.08262	1	0.06528	0.10004	3.1745	0.31759	y6+;Y1+;	y6+;Y1+;	No
MS2.17911.17911.3.1.dta	3345.36	1284.6	3	MVSHHJLTTGAT	1,Oxidation[M];	2060.76	5-4-0-0-3	6,	1	0.08262	1	0.06528	0.10004	3.1745	0.31759	y6+;Y1+;	y6+;Y1+;	No
MS2.8872.8872.3.1.dta	3065.23	769.388	3	YFTPJK	-	2295.82	7-5-0-0-1	5,	1	0.03492	1	0.0494	0.0966	3.2847	0.31729	y3+;Y1+;	y3+;Y1+;	No
MS2.20527.20527.4.1.dta	4659.93	2339.08	4	GLTFQQJASSMCVPDQDTAIR	12,Carbamidomethyl[C];	2320.86	5-6-0-0-2	7,	0	0	4	0.09189	0.10438	3.03913	0.31722	y1+;y4+;y5+;y6+;	y4+;y6+;	No
MS2.29823.29823.3.0.dta	3921.66	2381.1	3	STGKPTLYJVSLVMSDTAGTCY	14,Oxidation[M];21,Carbamidomethyl[C];	1540.53	7-2-0-0-0	9,	0	0	7	0.11034	0.1047	3.02854	0.31708	b4+;b7+;b8+;b9+;b10+;b12+;b13+;	b8+;b10+;	No
MS2.32111.32111.4.2.dta	4552.96	2200.07	4	LAGKPTHVJVSVVMAEVDGTC	14,Oxidation[M];21,Carbamidomethyl[C];	2352.87	5-4-0-0-5	9,	0	0	6	0.14576	0.10481	3.02335	0.31687	b8+;b10+;y1+;y2+;y4+;y5+;	y1+;y2+;	No
MS2.4115.4115.3.0.dta	2396.97	993.46	3	JNSDISSTR	-	1403.51	4-3-0-0-1	1,	0	0	2	0.10453	0.09791	3.22517	0.31578	y1+;y5+;	y1+;y5+;	No
MS2.28286.28286.4.1.dta	4825.98	1744.89	4	YFTPJKTEDTIFLR	-	3081.09	7-6-2-0-1	5,	3	0.09992	1	0.04551	0.10342	3.05003	0.31542	y5+;Y0++;Y1++;Y3++;	y5+;Y1++;	No
MS2.19099.19099.4.1.dta	4834.91	2339.08	4	GLTFQQJASSMCVPDQDTAIR	12,Carbamidomethyl[C];	2495.87	5-4-3-0-0	7,	0	0	3	0.07681	0.10363	3.03913	0.31493	y4+;y6+;y8+;	y6+;y8+;	No
MS2.16732.16732.3.0.dta	3344.37	1284.62	3	YKJNSDISSTR	-	2059.73	5-4-1-0-1	3,	2	0.05253	1	0.05387	0.08089	3.87262	0.31324	y5+;Y0+;Y0++;	y5+;Y0+;Y0++;	No
MS2.18430.18430.4.1.dta	4300.85	2184.08	4	LAGKPTHVJVSVVMAEVDGTC	21,Carbamidomethyl[C];	2116.76	5-5-1-0-0	9,	0	0	13	0.12254	0.15311	2.04524	0.31315	b4+;b5+;b6+;b7+;b9+;b10+;b12+;y1+;y2+;y3+;y4+;y5+;y7+;	y1+;	No
MS2.27764.27764.3.0.dta	4736.96	1581.83	3	FTPJKTEDTIFLR	-	3155.13	8-7-1-0-1	4,	0	0	5	0.14741	0.14507	2.14519	0.3112	y1+;y3+;y5+;y6+;y7+;	y5+;	No
MS2.27764.27764.3.1.dta	4737.96	1581.83	3	FTPJKTEDTIFLR	-	3156.15	8-7-0-0-3	4,	0	0	5	0.14741	0.14507	2.14519	0.3112	y1+;y3+;y5+;y6+;y7+;	y5+;	No
MS2.27124.27124.3.2.dta	3525.54	1740.89	3	FSIJTTNVMGTSLTVR	-	1784.63	6-4-0-0-0	4,	0	0	6	0.11822	0.14546	2.12912	0.30971	y1+;y5+;y7+;y8+;y10+;y15+;	y1+;	No
MS2.37716.37716.4.1.dta	5090.29	3541.72	4	SLGNVJFTVSAEALESQELCGTEVPSVPEHGRK	20,Carbamidomethyl[C];	1548.54	4-3-1-0-0	6,	0	0	2	0.16439	0.10095	3.03913	0.30679	y6+;y9+;	y6+;y9+;	No
MS2.37716.37716.4.2.dta	5091.29	3541.72	4	SLGNVJFTVSAEALESQELCGTEVPSVPEHGRK	20,Carbamidomethyl[C];	1549.57	4-3-0-0-2	6,	0	0	2	0.16439	0.10095	3.03913	0.30679	y6+;y9+;	y6+;y9+;	No
MS2.31765.31765.4.0.dta	4534.94	1891.96	4	FYFTPJKTEDTIFLR	-	2642.95	5-4-2-0-3	6,	5	0.04	6	0.06074	0.14785	2.06901	0.3059	b2+;y5+;y6+;y7+;y8+;y9+;Y0++;Y0++;Y1++;Y1++;Y2++;	y5+;	Yes	1	1	1
MS2.31765.31765.4.1.dta	4535.94	1891.96	4	FYFTPJKTEDTIFLR	-	2643.94	7-6-1-0-0	6,	5	0.04	6	0.06074	0.14785	2.06901	0.3059	b2+;y5+;y6+;y7+;y8+;y9+;Y0++;Y0++;Y1++;Y1++;Y2++;	y5+;	Yes	1	1	1
MS2.30974.30974.3.0.dta	2939.25	1008.54	3	VSJQTLSLF	-	1930.69	6-4-0-0-1	3,	2	0.01142	5	0.0823	0.13923	2.19368	0.30542	b5+;b6+;b7+;b8+;y2+;Y0+;Y1+;	b6+;	No
MS2.4101.4101.3.0.dta	3440.31	796.347	3	NEEYJK	-	2643.94	7-6-1-0-0	5,	2	0.06232	3	0.04147	0.1365	2.23735	0.3054	b2+;b3+;y3+;Y0+;Y0+;	Y0+;	No
MS2.28644.28644.4.3.dta	4856.97	1744.89	4	YFTPJKTEDTIFLR	-	3112.09	7-4-3-0-2	5,	3	0.08368	1	0.05139	0.10007	3.05003	0.30523	y5+;Y0++;Y1++;Y2++;	y5+;Y1++;	No
MS2.27173.27173.3.0.dta	3630.64	1408.82	3	LVPVPITJATLDR	-	2221.79	6-4-1-0-1	8,	4	0.04079	5	0.06493	0.14225	2.14519	0.30514	b3+;y1+;y4+;y5+;y9+;Y0+;Y0+;Y2+;Y3+;	y1+;	Yes	1	1	1
MS2.27173.27173.3.1.dta	3631.63	1408.82	3	LVPVPITJATLDR	-	2222.81	6-4-0-0-3	8,	4	0.04079	5	0.06493	0.14225	2.14519	0.30514	b3+;y1+;y4+;y5+;y9+;Y0+;Y0+;Y2+;Y3+;	y1+;	No
MS2.34015.34015.3.0.dta	4844.06	1567.87	3	PVPITJATLDQITGK	-	3276.16	10-6-1-0-1	6,	0	0	7	0.11031	0.14355	2.12398	0.30491	b4+;y3+;y5+;y6+;y8+;y9+;y13+;	y6+;	No
MS2.32523.32523.3.1.dta	3231.35	1008.54	3	VSJQTLSLF	-	2222.81	6-4-0-0-3	3,	2	0.01081	6	0.07303	0.13895	2.19368	0.30481	b3+;b4+;b5+;b7+;b8+;y6+;Y0+;Y0+;	b4+;	No
MS2.32523.32523.3.0.dta	3230.35	1008.54	3	VSJQTLSLF	-	2221.79	6-4-1-0-1	3,	2	0.01081	6	0.07303	0.13895	2.19368	0.30481	b3+;b4+;b5+;b7+;b8+;y6+;Y0+;Y0+;	b4+;	No
MS2.14263.14263.3.0.dta	3548.45	1284.62	3	YKJNSDISSTR	-	2263.83	5-5-0-0-3	3,	1	0.05469	1	0.07198	0.09543	3.19058	0.30446	y5+;Y1+;	y5+;Y1+;	No
MS2.9033.9033.3.1.dta	2684.08	769.388	3	YFTPJK	-	1914.7	5-4-0-0-2	5,	2	0.0895	1	0.02782	0.12019	2.52775	0.30382	y3+;Y0+;Y1+;	Y1+;	No
MS2.9033.9033.3.0.dta	2683.07	769.388	3	YFTPJK	-	1913.68	5-4-1-0-0	5,	2	0.0895	1	0.02782	0.12019	2.52775	0.30382	y3+;Y0+;Y1+;	Y1+;	No
MS2.23187.23187.4.3.dta	4260.83	2184.08	4	LAGKPTHVJVSVVMAEVDGTC	21,Carbamidomethyl[C];	2076.75	6-4-0-0-2	9,	0	0	3	0.09471	0.0794	3.82069	0.30337	b8+;b10+;y1+;	b8+;b10+;y1+;	No
MS2.23187.23187.4.0.dta	4259.82	2184.08	4	LAGKPTHVJVSVVMAEVDGTC	21,Carbamidomethyl[C];	2075.73	6-4-1-0-0	9,	0	0	3	0.09471	0.0794	3.82069	0.30337	b8+;b10+;y1+;	b8+;b10+;y1+;	No
MS2.39443.39443.4.1.dta	5141.28	3413.63	4	SLGNVJFTVSAEALESQELCGTEVPSVPEHGR	20,Carbamidomethyl[C];	1727.61	6-3-0-0-1	6,	0	0	2	0.15737	0.09993	3.03379	0.30317	y5+;y8+;	y5+;y8+;	No
MS2.31990.31990.3.1.dta	4169.74	1744.89	3	YFTPJKTEDTIFLR	-	2424.87	6-5-1-0-1	5,	0	0	3	0.10976	0.09809	3.07965	0.3021	b2+;y5+;y8+;	b2+;y5+;	No
MS2.31725.31725.5.0.dta	4738.02	2184.08	5	LAGKPTHVJVSVVMAEVDGTC	21,Carbamidomethyl[C];	2553.91	5-5-2-0-1	9,	0	0	8	0.16465	0.1476	2.04524	0.30188	b7+;b8+;b11+;b12+;y1+;y2+;y4+;y5+;	y1+;	No
MS2.31725.31725.5.1.dta	4739.01	2184.08	5	LAGKPTHVJVSVVMAEVDGTC	21,Carbamidomethyl[C];	2554.93	5-5-1-0-3	9,	0	0	8	0.16465	0.1476	2.04524	0.30188	b7+;b8+;b11+;b12+;y1+;y2+;y4+;y5+;	y1+;	Yes	2	1	1
MS2.27936.27936.5.0.dta	4679.93	1744.89	5	YFTPJKTEDTIFLR	-	2935.04	7-6-2-0-0	5,	3	0.06559	1	0.02403	0.0783	3.85241	0.30163	y5+;Y1+;Y1++;Y1++;	y5+;Y1+;Y1++;	No
MS2.4076.4076.3.0.dta	4148.6	776.39	3	EJGTISR	-	3372.19	7-6-3-0-1	2,	3	0.19244	1	0.01032	0.13538	2.22193	0.30079	y1+;Y1+;Y1+;Y2+;	Y1+;	Yes	3	1	1
MS2.23554.23554.3.1.dta	3509.54	1740.89	3	FSIJTTNVMGTSLTVR	-	1768.64	5-4-0-0-1	4,	0	0	4	0.10839	0.09573	3.13729	0.30033	y1+;y7+;y8+;y10+;	y1+;y8+;	No
MS2.38304.38304.4.2.dta	5253.35	3541.72	4	SLGNVJFTVSAEALESQELCGTEVPSVPEHGRK	20,Carbamidomethyl[C];	1711.62	5-3-0-0-2	6,	0	0	2	0.15888	0.09878	3.03913	0.30021	y6+;y9+;	y6+;y9+;	No
MS2.38304.38304.4.1.dta	5252.34	3541.72	4	SLGNVJFTVSAEALESQELCGTEVPSVPEHGRK	20,Carbamidomethyl[C];	1710.6	5-3-1-0-0	6,	0	0	2	0.15888	0.09878	3.03913	0.30021	y6+;y9+;	y6+;y9+;	No
MS2.6973.6973.3.0.dta	3249.25	1189.51	3	EEQYJSTYR	-	2059.73	5-4-1-0-1	5,	2	0.11494	1	0.02532	0.09298	3.22517	0.29989	y1+;Y1+;Y1+;	Y1+;Y1+;	No
MS2.6973.6973.3.1.dta	3250.25	1189.51	3	EEQYJSTYR	-	2060.76	5-4-0-0-3	5,	2	0.11494	1	0.02532	0.09298	3.22517	0.29989	y1+;Y1+;Y1+;	Y1+;Y1+;	No
MS2.32762.32762.4.5.dta	4898.98	1891.96	4	FYFTPJKTEDTIFLR	-	3007.06	6-5-3-0-1	6,	0	0	7	0.11831	0.14484	2.06901	0.29967	b2+;b3+;y1+;y5+;y6+;y7+;y8+;	y5+;	No
MS2.32762.32762.4.4.dta	4902.07	1891.96	4	FYFTPJKTEDTIFLR	-	3010.12	6-5-0-0-7	6,	0	0	7	0.11831	0.14484	2.06901	0.29967	b2+;b3+;y1+;y5+;y6+;y7+;y8+;	y5+;	No
MS2.32762.32762.4.2.dta	4900	1891.96	4	FYFTPJKTEDTIFLR	-	3008.08	6-5-2-0-3	6,	0	0	7	0.11831	0.14484	2.06901	0.29967	b2+;b3+;y1+;y5+;y6+;y7+;y8+;	y5+;	No
MS2.32762.32762.4.1.dta	4901.07	1891.96	4	FYFTPJKTEDTIFLR	-	3009.07	8-7-1-0-0	6,	0	0	7	0.11831	0.14484	2.06901	0.29967	b2+;b3+;y1+;y5+;y6+;y7+;y8+;	y5+;	No
MS2.13027.13027.3.0.dta	3547.45	1284.62	3	YKJNSDISSTR	-	2262.81	5-5-1-0-1	3,	1	0.06464	1	0.06072	0.09384	3.19058	0.2994	y5+;Y1+;	y5+;Y1+;	No
MS2.13027.13027.3.1.dta	3548.44	1284.62	3	YKJNSDISSTR	-	2263.83	5-5-0-0-3	3,	1	0.06464	1	0.06072	0.09384	3.19058	0.2994	y5+;Y1+;	y5+;Y1+;	No
MS2.33857.33857.3.0.dta	4049.79	1753.93	3	CANLVPVPITJATLDR	1,Carbamidomethyl[C];	2295.82	7-5-0-0-1	11,	1	0.04277	5	0.04934	0.09538	3.13729	0.29924	y1+;y2+;y4+;y5+;y11+;Y1+;	y1+;Y1+;	No
MS2.26702.26702.3.0.dta	4023.7	1581.83	3	FTPJKTEDTIFLR	-	2441.88	7-5-0-0-2	4,	0	0	2	0.13172	0.09449	3.15914	0.2985	y1+;y5+;	y1+;y5+;	No
MS2.5406.5406.3.0.dta	3913.53	993.46	3	JNSDISSTR	-	2920.06	6-6-1-0-3	1,	0	0	2	0.07667	0.09243	3.22517	0.2981	y5+;y7+;	y5+;y7+;	No
MS2.33679.33679.4.1.dta	5157.08	1581.83	4	FTPJKTEDTIFLR	-	3575.27	7-7-3-0-1	4,	0	0	7	0.09874	0.13859	2.14519	0.2973	b2+;y1+;y3+;y5+;y6+;y7+;y8+;	y5+;	No
MS2.4705.4705.2.0.dta	3371.36	993.46	2	JNSDISSTR	-	2377.88	5-7-0-0-1	1,	0	0	3	0.15002	0.13529	2.19368	0.29679	y1+;y4+;y5+;	y5+;	No
MS2.18616.18616.3.0.dta	4795.03	2184.08	3	LAGKPTHVJVSVVMAEVDGTC	21,Carbamidomethyl[C];	2610.93	5-6-2-0-0	9,	0	0	4	0.14544	0.09813	3.02335	0.29667	b4+;y2+;y4+;y5+;	y2+;y5+;	No
MS2.27875.27875.3.0.dta	4826	1581.83	3	FTPJKTEDTIFLR	-	3244.17	8-6-1-0-3	4,	0	0	2	0.10755	0.09347	3.15914	0.29527	y5+;y6+;	y5+;y6+;	No
MS2.27875.27875.3.1.dta	4827	1581.83	3	FTPJKTEDTIFLR	-	3245.19	8-6-0-0-5	4,	0	0	2	0.10755	0.09347	3.15914	0.29527	y5+;y6+;	y5+;y6+;	No
MS2.24045.24045.4.4.dta	4532.9	1581.83	4	FTPJKTEDTIFLR	-	2951.06	6-4-2-0-4	4,	1	0.09056	1	0.05274	0.09306	3.15914	0.29398	y5+;Y1+;	y5+;Y1+;	No
MS2.24045.24045.4.2.dta	4533.9	1581.83	4	FTPJKTEDTIFLR	-	2952.05	8-6-1-0-1	4,	1	0.09056	1	0.05274	0.09306	3.15914	0.29398	y5+;Y1+;	y5+;Y1+;	Yes	3	1	1
MS2.14066.14066.3.0.dta	3419.5	1593.83	3	SIJTTNVMGTSLTVR	-	1825.66	5-5-0-0-0	3,	0	0	9	0.09898	0.1382	2.12398	0.29354	b2+;b4+;y1+;y2+;y3+;y4+;y5+;y6+;y7+;	y5+;	No
MS2.25249.25249.3.1.dta	4551.92	2184.08	3	LAGKPTHVJVSVVMAEVDGTC	21,Carbamidomethyl[C];	2367.85	6-4-1-0-2	9,	0	0	8	0.13283	0.14347	2.04524	0.29344	b7+;b8+;b10+;b12+;y2+;y3+;y4+;y5+;	b8+;	No
MS2.25249.25249.3.0.dta	4550.93	2184.08	3	LAGKPTHVJVSVVMAEVDGTC	21,Carbamidomethyl[C];	2366.83	6-4-2-0-0	9,	0	0	8	0.13283	0.14347	2.04524	0.29344	b7+;b8+;b10+;b12+;y2+;y3+;y4+;y5+;	b8+;	Yes	2	1	0
MS2.27837.27837.4.2.dta	4752.92	1581.83	4	FTPJKTEDTIFLR	-	3171.13	9-7-1-0-0	4,	0	0	7	0.08577	0.13659	2.14519	0.293	y1+;y3+;y4+;y5+;y6+;y9+;y11+;	y5+;	No
MS2.27837.27837.4.0.dta	4753.98	1581.83	4	FTPJKTEDTIFLR	-	3172.15	9-7-0-0-2	4,	0	0	7	0.08577	0.13659	2.14519	0.293	y1+;y3+;y4+;y5+;y6+;y9+;y11+;	y5+;	No
MS2.9988.9988.3.1.dta	3548.45	1284.62	3	YKJNSDISSTR	-	2263.83	5-5-0-0-3	3,	1	0.08509	1	0.04194	0.09177	3.19058	0.2928	y5+;Y1+;	y5+;Y1+;	No
MS2.9988.9988.3.0.dta	3547.44	1284.62	3	YKJNSDISSTR	-	2262.81	5-5-1-0-1	3,	1	0.08509	1	0.04194	0.09177	3.19058	0.2928	y5+;Y1+;	y5+;Y1+;	No
MS2.8021.8021.3.0.dta	3104.23	1189.51	3	EEQYJSTYR	-	1914.7	5-4-0-0-2	5,	5	0.05787	4	0.03123	0.13222	2.19368	0.29006	y1+;y2+;y3+;y4+;Y0+;Y0+;Y1+;Y1+;Y2+;	Y1+;	Yes	1	1	1
MS2.37644.37644.5.0.dta	5253.34	3541.72	5	SLGNVJFTVSAEALESQELCGTEVPSVPEHGRK	20,Carbamidomethyl[C];	1711.62	5-3-0-0-2	6,	0	0	2	0.15088	0.09536	3.03913	0.28981	y6+;y9+;	y6+;y9+;	No
MS2.22865.22865.4.1.dta	4472.83	2339.08	4	GLTFQQJASSMCVPDQDTAIR	12,Carbamidomethyl[C];	2133.77	6-5-0-0-1	7,	0	0	3	0.15242	0.14068	2.05687	0.28937	y4+;y6+;y8+;	y8+;	No
MS2.29900.29900.3.1.dta	4769.97	1581.83	3	FTPJKTEDTIFLR	-	3188.14	10-7-0-0-1	4,	0	0	2	0.11973	0.09152	3.15914	0.28914	y5+;y8+;	y5+;y8+;	No
MS2.27663.27663.3.0.dta	4602.89	2339.08	3	GLTFQQJASSMCVPDQDTAIR	12,Carbamidomethyl[C];	2263.83	5-5-0-0-3	7,	0	0	2	0.10092	0.09509	3.03913	0.289	y6+;y8+;	y6+;y8+;	No
MS2.12595.12595.2.0.dta	2762.06	776.39	2	EJGTISR	-	1985.7	4-3-2-0-1	2,	1	0.09758	1	0.03523	0.08853	3.26366	0.28894	y1+;Y4+;	y1+;Y4+;	No
MS2.33492.33492.4.0.dta	4496.02	1780.02	4	LVPVPITJATLDQITGK	-	2715.96	6-5-2-0-1	8,	0	0	7	0.11028	0.13587	2.12398	0.28858	b3+;b4+;y3+;y6+;y7+;y8+;y13+;	y3+;	Yes	2	1	1
MS2.33492.33492.4.3.dta	4498.03	1780.02	4	LVPVPITJATLDQITGK	-	2717.98	8-7-0-0-0	8,	0	0	7	0.11028	0.13587	2.12398	0.28858	b3+;b4+;y3+;y6+;y7+;y8+;y13+;	y3+;	No
MS2.32774.32774.3.0.dta	4975.09	1891.96	3	FYFTPJKTEDTIFLR	-	3083.14	7-6-0-0-5	6,	0	0	2	0.13702	0.09424	3.05561	0.28797	b2+;y5+;	b2+;y5+;	No
MS2.18591.18591.5.0.dta	4591.95	2184.08	5	LAGKPTHVJVSVVMAEVDGTC	21,Carbamidomethyl[C];	2407.85	5-5-2-0-0	9,	0	0	4	0.12278	0.09483	3.02335	0.28671	b8+;y1+;y2+;y5+;	y1+;y5+;	No
MS2.13991.13991.3.0.dta	3440.42	958.557	3	TPLTAJITK	-	2481.89	6-6-1-0-0	6,	1	0.2489	1	0.02307	0.13064	2.19368	0.28659	y5+;Y2+;	Y2+;	No
MS2.27763.27763.4.1.dta	3965.68	2052	4	MVSHHJLTTGATLINEQW	-	1913.68	5-4-1-0-0	6,	2	0.0145	9	0.09045	0.13924	2.05687	0.2864	b4+;b5+;b6+;b7+;b11+;y2+;y3+;y4+;y5+;Y0++;Y1++;	y2+;	Yes	1	1	1
MS2.15507.15507.3.1.dta	3565.55	1593.83	3	SIJTTNVMGTSLTVR	-	1971.72	5-5-0-0-1	3,	0	0	9	0.09246	0.13466	2.12398	0.28601	b2+;b3+;b4+;y1+;y3+;y4+;y5+;y6+;y7+;	y5+;	No
MS2.26636.26636.4.1.dta	3978.73	1408.82	4	LVPVPITJATLDR	-	2569.9	6-5-2-0-0	8,	4	0.12549	3	0.03175	0.13316	2.14519	0.28566	b3+;y1+;y5+;Y0+;Y1+;Y2+;Y3+;	Y1+;	Yes	1	1	1
MS2.26800.26800.3.1.dta	4053.78	1408.82	3	LVPVPITJATLDR	-	2644.96	7-6-0-0-2	8,	1	0.07146	2	0.05639	0.08998	3.15914	0.28426	y1+;y5+;Y1+;	y1+;Y1+;	No
MS2.38924.38924.4.1.dta	5166.24	3413.63	4	SLGNVJFTVSAEALESQELCGTEVPSVPEHGR	20,Carbamidomethyl[C];	1752.64	4-4-0-0-2	6,	0	0	2	0.14086	0.09181	3.096	0.28423	y5+;y8+;	y5+;y8+;	No
MS2.4004.4004.3.0.dta	3637.4	776.39	3	EJGTISR	-	2861	6-5-3-0-0	2,	3	0.16038	1	0.0133	0.12784	2.22193	0.28406	y1+;Y1+;Y2+;Y4+;	Y1+;	Yes	3	1	1
MS2.31551.31551.3.0.dta	4738.01	2184.08	3	LAGKPTHVJVSVVMAEVDGTC	21,Carbamidomethyl[C];	2553.91	5-5-2-0-1	9,	0	0	4	0.12899	0.09344	3.02335	0.28251	b7+;b8+;y1+;y2+;	b8+;y1+;	Yes	2	1	1
MS2.32159.32159.3.0.dta	3743.6	2381.1	3	STGKPTLYJVSLVMSDTAGTCY	14,Oxidation[M];21,Carbamidomethyl[C];	1362.48	5-2-0-0-1	9,	0	0	6	0.22815	0.13733	2.04906	0.28139	b7+;b10+;y1+;y2+;y3+;y4+;	y2+;	No
MS2.30985.30985.3.0.dta	2922.22	1008.54	3	VSJQTLSLF	-	1913.68	5-4-1-0-0	3,	0	0	3	0.10657	0.08704	3.22517	0.28073	b4+;b5+;b6+;	b4+;b6+;	Yes	2	1	1
MS2.30985.30985.3.1.dta	2923.23	1008.54	3	VSJQTLSLF	-	1914.7	5-4-0-0-2	3,	0	0	3	0.10657	0.08704	3.22517	0.28073	b4+;b5+;b6+;	b4+;b6+;	No
MS2.17810.17810.4.1.dta	4038.61	1920.85	4	QQJASSMCVPDQDTAIR	8,Carbamidomethyl[C];	2117.78	5-5-0-0-2	3,	0	0	2	0.11096	0.09243	3.03379	0.28042	y1+;y8+;	y1+;y8+;	No
MS2.25183.25183.3.0.dta	3344.37	1284.6	3	MVSHHJLTTGAT	1,Oxidation[M];	2059.73	5-4-1-0-1	6,	1	0.05648	1	0.06044	0.08815	3.1745	0.27984	y6+;Y1+;	y6+;Y1+;	No
MS2.25183.25183.3.1.dta	3345.37	1284.6	3	MVSHHJLTTGAT	1,Oxidation[M];	2060.76	5-4-0-0-3	6,	1	0.05648	1	0.06044	0.08815	3.1745	0.27984	y6+;Y1+;	y6+;Y1+;	No
MS2.31687.31687.4.1.dta	4552.96	1891.96	4	FYFTPJKTEDTIFLR	-	2660.96	8-6-0-0-1	6,	5	0.02502	7	0.04435	0.13518	2.06901	0.27969	b2+;b3+;b4+;y5+;y6+;y8+;y9+;Y0++;Y0++;Y1++;Y2++;Y3++;	y5+;	Yes	1	1	1
MS2.31687.31687.4.0.dta	4551.96	1891.96	4	FYFTPJKTEDTIFLR	-	2659.96	6-4-1-0-4	6,	5	0.02502	7	0.04435	0.13518	2.06901	0.27969	b2+;b3+;b4+;y5+;y6+;y8+;y9+;Y0++;Y0++;Y1++;Y2++;Y3++;	y5+;	Yes	1	1	1
MS2.18277.18277.4.0.dta	4503.94	2184.08	4	LAGKPTHVJVSVVMAEVDGTC	21,Carbamidomethyl[C];	2319.84	5-6-1-0-0	9,	0	0	11	0.10714	0.13657	2.04524	0.27932	b4+;b6+;b7+;b10+;b12+;y1+;y2+;y3+;y4+;y5+;y7+;	y1+;	No
MS2.37816.37816.5.0.dta	5456.42	3541.72	5	SLGNVJFTVSAEALESQELCGTEVPSVPEHGRK	20,Carbamidomethyl[C];	1914.7	5-4-0-0-2	6,	0	0	2	0.14142	0.0918	3.03913	0.27898	y6+;y9+;	y6+;y9+;	No
MS2.18388.18388.3.0.dta	4300.85	2184.08	3	LAGKPTHVJVSVVMAEVDGTC	21,Carbamidomethyl[C];	2116.76	5-5-1-0-0	9,	0	0	10	0.11237	0.13628	2.04524	0.27872	b3+;b4+;b7+;b10+;b11+;b12+;y2+;y3+;y4+;y5+;	b7+;	No
MS2.13483.13483.3.0.dta	3547.44	1284.62	3	YKJNSDISSTR	-	2262.81	5-5-1-0-1	3,	1	0.05971	1	0.05137	0.08733	3.19058	0.27865	y5+;Y1+;	y5+;Y1+;	No
MS2.13483.13483.3.1.dta	3548.44	1284.62	3	YKJNSDISSTR	-	2263.83	5-5-0-0-3	3,	1	0.05971	1	0.05137	0.08733	3.19058	0.27865	y5+;Y1+;	y5+;Y1+;	No
MS2.5044.5044.3.2.dta	3645.41	993.46	3	JNSDISSTR	-	2651.96	4-7-2-0-0	1,	0	0	2	0.08096	0.08627	3.22517	0.27824	y1+;y5+;	y1+;y5+;	No
MS2.5044.5044.3.3.dta	3646.41	993.46	3	JNSDISSTR	-	2652.98	4-7-1-0-2	1,	0	0	2	0.08096	0.08627	3.22517	0.27824	y1+;y5+;	y1+;y5+;	No
MS2.4250.4250.3.0.dta	4310.66	776.39	3	EJGTISR	-	3534.24	8-6-3-0-1	2,	3	0.10057	2	0.02023	0.12396	2.22193	0.27542	y1+;y5+;Y1+;Y1+;Y2+;	Y1+;	No
MS2.4250.4250.3.1.dta	4311.66	776.39	3	EJGTISR	-	3535.26	8-6-2-0-3	2,	3	0.10057	2	0.02023	0.12396	2.22193	0.27542	y1+;y5+;Y1+;Y1+;Y2+;	Y1+;	No
MS2.25691.25691.4.0.dta	4753.98	1744.89	4	YFTPJKTEDTIFLR	-	3009.07	8-7-1-0-0	5,	2	0.05402	1	0.06922	0.0902	3.05003	0.27512	y5+;Y1+;Y1++;	y5+;Y1++;	No
MS2.27800.27800.4.1.dta	4534.92	2184.08	4	LAGKPTHVJVSVVMAEVDGTC	21,Carbamidomethyl[C];	2350.83	5-4-2-0-1	9,	1	0.00782	4	0.09655	0.09097	3.02335	0.27502	b8+;y2+;y4+;y5+;Y1++;	y4+;y5+;	No
MS2.38091.38091.5.0.dta	5455.37	3541.72	5	SLGNVJFTVSAEALESQELCGTEVPSVPEHGRK	20,Carbamidomethyl[C];	1913.68	5-4-1-0-0	6,	0	0	2	0.13819	0.09042	3.03913	0.27479	y6+;y9+;	y6+;y9+;	No
MS2.28131.28131.3.2.dta	4558.92	1581.83	3	FTPJKTEDTIFLR	-	2977.08	6-7-1-0-2	4,	0	0	2	0.10831	0.08663	3.15914	0.27368	y1+;y5+;	y1+;y5+;	No
MS2.26029.26029.4.1.dta	4826	1581.83	4	FTPJKTEDTIFLR	-	3244.17	8-6-1-0-3	4,	1	0.04519	2	0.05082	0.0861	3.15914	0.27199	y1+;y5+;Y1+;	y5+;Y1+;	No
MS2.28130.28130.3.1.dta	3966.68	2052	3	MVSHHJLTTGATLINEQW	-	1914.7	5-4-0-0-2	6,	0	0	4	0.12226	0.08918	3.03913	0.27103	b5+;b6+;b7+;y2+;	b6+;b7+;	No
MS2.28130.28130.3.0.dta	3965.68	2052	3	MVSHHJLTTGATLINEQW	-	1913.68	5-4-1-0-0	6,	0	0	4	0.12226	0.08918	3.03913	0.27103	b5+;b6+;b7+;y2+;	b6+;b7+;	Yes	3	1	1
MS2.31805.31805.4.0.dta	5038.2	1795.01	4	VVLHPJYSQVDIGLIK	-	3243.15	8-6-2-0-1	6,	4	0.04556	4	0.06008	0.13138	2.06085	0.27076	b4+;y4+;y5+;y12+;Y1+;Y2++;Y3++;Y5++;	b4+;	No
MS2.29886.29886.3.1.dta	4257.79	2052	3	MVSHHJLTTGATLINEQW	-	2205.79	5-4-1-0-2	6,	0	0	8	0.12898	0.13149	2.05687	0.27045	b4+;b5+;b6+;b7+;b8+;b9+;y2+;y4+;	b5+;	No
MS2.29886.29886.3.0.dta	4256.79	2052	3	MVSHHJLTTGATLINEQW	-	2204.77	5-4-2-0-0	6,	0	0	8	0.12898	0.13149	2.05687	0.27045	b4+;b5+;b6+;b7+;b8+;b9+;y2+;y4+;	b5+;	Yes	2	1	1
MS2.25553.25553.4.2.dta	3655.58	1740.89	4	FSIJTTNVMGTSLTVR	-	1914.7	5-4-0-0-2	4,	1	0.04394	2	0.08367	0.08599	3.13729	0.26979	y7+;y8+;Y1+;	y8+;Y1+;	No
MS2.15508.15508.3.2.dta	3524.52	1593.83	3	SIJTTNVMGTSLTVR	-	1930.69	6-4-0-0-1	3,	0	0	9	0.08083	0.12619	2.12398	0.26801	b2+;b3+;b4+;y1+;y3+;y4+;y5+;y6+;y7+;	y5+;	No
MS2.24333.24333.3.0.dta	3345.36	1284.62	3	YKJNSDISSTR	-	2060.76	5-4-0-0-3	3,	1	0.02802	2	0.04721	0.08396	3.19058	0.26787	y1+;y5+;Y1+;	y5+;Y1+;	No
MS2.24333.24333.3.1.dta	3344.36	1284.62	3	YKJNSDISSTR	-	2059.73	5-4-1-0-1	3,	1	0.02802	2	0.04721	0.08396	3.19058	0.26787	y1+;y5+;Y1+;	y5+;Y1+;	No
MS2.8386.8386.3.0.dta	3547.44	1284.62	3	YKJNSDISSTR	-	2262.81	5-5-1-0-1	3,	1	0.05122	1	0.05012	0.08343	3.19058	0.2662	y5+;Y1+;	y5+;Y1+;	No
MS2.27312.27312.3.1.dta	3508.51	1593.83	3	SIJTTNVMGTSLTVR	-	1914.7	5-4-0-0-2	3,	1	0.08153	4	0.07578	0.12518	2.12398	0.26587	y1+;y7+;y8+;y11+;Y1+;	Y1+;	No
MS2.27312.27312.3.0.dta	3507.52	1593.83	3	SIJTTNVMGTSLTVR	-	1913.68	5-4-1-0-0	3,	1	0.08153	4	0.07578	0.12518	2.12398	0.26587	y1+;y7+;y8+;y11+;Y1+;	Y1+;	No
MS2.33033.33033.4.1.dta	5328.31	3413.63	4	SLGNVJFTVSAEALESQELCGTEVPSVPEHGR	20,Carbamidomethyl[C];	1914.7	5-4-0-0-2	6,	0	0	2	0.12674	0.08761	3.03379	0.26579	y5+;y8+;	y5+;y8+;	No
MS2.24010.24010.4.4.dta	4479.92	2184.08	4	LAGKPTHVJVSVVMAEVDGTC	21,Carbamidomethyl[C];	2295.82	7-5-0-0-1	9,	0	0	8	0.11787	0.12829	2.04524	0.26237	b7+;b8+;b10+;b11+;y2+;y3+;y4+;y5+;	b8+;	No
MS2.33344.33344.4.1.dta	4920.2	3541.72	4	SLGNVJFTVSAEALESQELCGTEVPSVPEHGRK	20,Carbamidomethyl[C];	1378.48	6-2-0-0-0	6,	0	0	3	0.10592	0.08615	3.03913	0.26181	y4+;y6+;y9+;	y6+;y9+;	No
MS2.15758.15758.3.2.dta	3811.57	1458.73	3	NLFLJHSEJATAK	-	2352.85	7-6-0-0-0	5,	2	0.11356	1	0.03235	0.08594	3.04454	0.26165	b4+;Y0+;Y1+;	Y0+;Y1+;	No
MS2.15758.15758.3.1.dta	3809.6	1458.73	3	NLFLJHSEJATAK	-	2350.83	5-4-2-0-1	5,	2	0.11356	1	0.03235	0.08594	3.04454	0.26165	b4+;Y0+;Y1+;	Y0+;Y1+;	No
MS2.15758.15758.3.0.dta	3810.58	1458.73	3	NLFLJHSEJATAK	-	2351.85	5-4-1-0-3	5,	2	0.11356	1	0.03235	0.08594	3.04454	0.26165	b4+;Y0+;Y1+;	Y0+;Y1+;	No
MS2.24316.24316.4.0.dta	4243.81	1744.89	4	YFTPJKTEDTIFLR	-	2498.9	7-6-0-0-1	5,	1	0.06646	1	0.06581	0.08571	3.05003	0.26141	y5+;Y1+;	y5+;Y1+;	No
MS2.38349.38349.5.0.dta	5455.38	3541.72	5	SLGNVJFTVSAEALESQELCGTEVPSVPEHGRK	20,Carbamidomethyl[C];	1913.68	5-4-1-0-0	6,	0	0	2	0.12703	0.08598	3.03913	0.26131	y6+;y9+;	y6+;y9+;	No
MS2.27837.27837.4.3.dta	4754.99	1744.89	4	YFTPJKTEDTIFLR	-	3010.09	8-7-0-0-2	5,	0	0	7	0.08577	0.12565	2.0649	0.25945	y1+;y3+;y4+;y5+;y6+;y9+;y11+;	y5+;	No
MS2.10079.10079.3.0.dta	2958.16	1173.52	3	EEQFJSTYR	-	1784.63	6-4-0-0-0	5,	1	0.10494	1	0.02909	0.08038	3.22517	0.25925	y1+;Y1+;	y1+;Y1+;	No
MS2.27962.27962.3.0.dta	4496.86	2339.08	3	GLTFQQJASSMCVPDQDTAIR	12,Carbamidomethyl[C];	2157.78	4-6-1-0-0	7,	0	0	5	0.0981	0.12598	2.05687	0.25912	y1+;y4+;y5+;y6+;y8+;	y1+;	No
MS2.31423.31423.4.0.dta	4651.11	2679.39	4	MVSHHJLTTGATLINEQWLLTTAK	-	1971.72	5-5-0-0-1	6,	0	0	6	0.14375	0.1246	2.06901	0.25779	y1+;y2+;y3+;y5+;y6+;y7+;	y5+;	No
MS2.31699.31699.3.0.dta	4551.95	2184.08	3	LAGKPTHVJVSVVMAEVDGTC	21,Carbamidomethyl[C];	2367.85	6-4-1-0-2	9,	0	0	7	0.0942	0.12568	2.04524	0.25704	b7+;b8+;b10+;b12+;b13+;y2+;y5+;	b8+;	Yes	2	1	1
MS2.35739.35739.4.1.dta	5456.38	3541.72	4	SLGNVJFTVSAEALESQELCGTEVPSVPEHGRK	20,Carbamidomethyl[C];	1914.7	5-4-0-0-2	6,	0	0	2	0.12586	0.08452	3.03913	0.25687	y6+;y9+;	y6+;y9+;	No
MS2.40248.40248.4.3.dta	5328.33	3413.63	4	SLGNVJFTVSAEALESQELCGTEVPSVPEHGR	20,Carbamidomethyl[C];	1914.7	5-4-0-0-2	6,	0	0	2	0.11882	0.08419	3.03379	0.25542	y5+;y8+;	y5+;y8+;	No
MS2.4804.4804.2.0.dta	3355.36	993.46	2	JNSDISSTR	-	2361.88	4-7-0-0-2	1,	0	0	2	0.1462	0.11631	2.19368	0.25514	y1+;y5+;	y5+;	No
MS2.28168.28168.3.0.dta	4415.86	1408.82	3	LVPVPITJATLDR	-	3007.06	6-5-3-0-1	8,	1	0.09644	1	0.0473	0.08064	3.15914	0.25476	y1+;Y1+;	y1+;Y1+;	No
MS2.39263.39263.4.0.dta	5182.28	3413.63	4	SLGNVJFTVSAEALESQELCGTEVPSVPEHGR	20,Carbamidomethyl[C];	1768.64	5-4-0-0-1	6,	0	0	2	0.11602	0.08344	3.03379	0.25314	y5+;y8+;	y5+;y8+;	No
MS2.36454.36454.4.5.dta	5416.38	3413.63	4	SLGNVJFTVSAEALESQELCGTEVPSVPEHGR	20,Carbamidomethyl[C];	2002.71	5-3-1-0-2	6,	0	0	3	0.09909	0.08322	3.03379	0.25246	b4+;y5+;y8+;	y5+;y8+;	No
MS2.5146.5146.3.0.dta	3053.26	1284.62	3	YKJNSDISSTR	-	1768.64	5-4-0-0-1	3,	1	0.0591	1	0.03578	0.07883	3.19058	0.2515	y5+;Y1+;	y5+;Y1+;	No
MS2.4732.4732.2.0.dta	3403.35	993.46	2	JNSDISSTR	-	2409.89	5-5-0-0-4	1,	0	0	1	0.18041	0.11454	2.19368	0.25126	y5+;	y5+;	No
MS2.4520.4520.3.0.dta	3346.32	993.46	3	JNSDISSTR	-	2352.85	7-6-0-0-0	1,	0	0	3	0.10356	0.11407	2.19368	0.25024	y1+;y4+;y5+;	y5+;	No
MS2.28351.28351.3.0.dta	4388.82	1581.83	3	FTPJKTEDTIFLR	-	2807.01	8-6-0-0-2	4,	0	0	2	0.09184	0.07916	3.15914	0.25007	y1+;y5+;	y1+;y5+;	No
MS2.9210.9210.3.3.dta	3369.35	1284.62	3	YKJNSDISSTR	-	2084.77	3-5-1-0-2	3,	0	0	1	0.1972	0.11475	2.16829	0.24881	y5+;	y5+;	No
MS2.25505.25505.3.1.dta	3688.63	1408.82	3	LVPVPITJATLDR	-	2279.83	6-5-0-0-2	8,	2	0.13503	2	0.04554	0.11587	2.14519	0.24856	y1+;y4+;Y1+;Y3+;	Y1+;	No
MS2.25505.25505.3.0.dta	3687.64	1408.82	3	LVPVPITJATLDR	-	2278.81	6-5-1-0-0	8,	2	0.13503	2	0.04554	0.11587	2.14519	0.24856	y1+;y4+;Y1+;Y3+;	Y1+;	Yes	1	1	1
MS2.23996.23996.4.0.dta	4958.09	2363.14	4	LAGKPTHVJVSVVMAEVDGTCY	14,Oxidation[M];21,Carbamidomethyl[C];	2594.94	4-6-2-0-1	9,	0	0	10	0.09904	0.12062	2.04906	0.24716	b4+;b6+;b7+;b10+;b12+;y2+;y3+;y4+;y5+;y6+;	y2+;	No
MS2.16215.16215.3.0.dta	3212.31	1183.54	3	GLTFQQJASSM	-	2028.74	5-6-0-0-0	7,	0	0	2	0.08556	0.07732	3.19058	0.24669	b6+;b8+;	b6+;b8+;	No
MS2.28274.28274.4.0.dta	4534.93	2184.08	4	LAGKPTHVJVSVVMAEVDGTC	21,Carbamidomethyl[C];	2350.83	5-4-2-0-1	9,	1	0.0099	3	0.10206	0.08116	3.02335	0.24537	y2+;y4+;y5+;Y0++;	y2+;y4+;	No
MS2.20902.20902.4.0.dta	4746.94	2339.08	4	GLTFQQJASSMCVPDQDTAIR	12,Carbamidomethyl[C];	2407.85	5-5-2-0-0	7,	0	0	4	0.09704	0.11923	2.05687	0.24525	y1+;y4+;y6+;y8+;	y8+;	No
MS2.20902.20902.4.2.dta	4747.94	2339.08	4	GLTFQQJASSMCVPDQDTAIR	12,Carbamidomethyl[C];	2408.87	5-5-1-0-2	7,	0	0	4	0.09704	0.11923	2.05687	0.24525	y1+;y4+;y6+;y8+;	y8+;	No
MS2.33231.33231.4.2.dta	5108.21	3413.63	4	SLGNVJFTVSAEALESQELCGTEVPSVPEHGR	20,Carbamidomethyl[C];	1694.6	4-3-1-0-1	6,	0	0	2	0.11117	0.08064	3.03379	0.24464	y5+;y8+;	y5+;y8+;	No
MS2.31086.31086.4.0.dta	4730.07	1795.01	4	VVLHPJYSQVDIGLIK	-	2935.04	7-6-2-0-0	6,	3	0.05569	4	0.06661	0.11855	2.06085	0.24431	b4+;y2+;y4+;y5+;Y0+;Y1+;Y1++;	Y1++;	No
MS2.37568.37568.4.0.dta	5123.26	3541.72	4	SLGNVJFTVSAEALESQELCGTEVPSVPEHGRK	20,Carbamidomethyl[C];	1581.56	6-3-0-0-0	6,	0	0	3	0.09501	0.08026	3.03913	0.24392	b2+;y6+;y9+;	y6+;y9+;	No
MS2.31612.31612.4.0.dta	4917.07	2184.08	4	LAGKPTHVJVSVVMAEVDGTC	21,Carbamidomethyl[C];	2732.98	7-5-1-0-2	9,	2	0.01885	6	0.09031	0.1189	2.04524	0.24317	b7+;b8+;y2+;y4+;y5+;y8+;Y1++;Y1++;	y5+;	No
MS2.29813.29813.4.3.dta	4769.99	1891.96	4	FYFTPJKTEDTIFLR	-	2878.02	7-5-2-0-1	6,	0	0	8	0.06826	0.11671	2.06901	0.24147	b2+;y3+;y4+;y6+;y7+;y8+;y9+;y14+;	b2+;	No
MS2.29239.29239.4.1.dta	4621.92	2052	4	MVSHHJLTTGATLINEQW	-	2569.9	6-5-2-0-0	6,	4	0.02578	7	0.0598	0.11731	2.05687	0.2413	b4+;b5+;b6+;b7+;y2+;y4+;y5+;Y0++;Y0++;Y1++;Y4++;	y2+;	Yes	1	1	1
MS2.12000.12000.3.0.dta	3082.22	1183.54	3	GLTFQQJASSM	-	1898.7	4-4-0-0-3	7,	0	0	1	0.26225	0.11107	2.16829	0.24082	b9+;	b9+;	No
MS2.19537.19537.4.1.dta	4591.95	1451.8	4	LAGKPTHVJVSVVM	-	3140.16	7-7-0-0-4	9,	0	0	9	0.04429	0.11243	2.13437	0.23998	b4+;b5+;b6+;b7+;b9+;b10+;b12+;b13+;y1+;	y1+;	No
MS2.10949.10949.3.0.dta	3212.29	1183.54	3	GLTFQQJASSM	-	2028.74	5-6-0-0-0	7,	0	0	2	0.09141	0.0751	3.19058	0.23963	b8+;b9+;	b8+;b9+;	No
MS2.24145.24145.3.0.dta	3800.61	2381.1	3	STGKPTLYJVSLVMSDTAGTCY	14,Oxidation[M];21,Carbamidomethyl[C];	1419.5	5-3-0-0-0	9,	0	0	3	0.13909	0.0791	3.02854	0.23955	b7+;y1+;y2+;	b7+;y2+;	No
MS2.12743.12743.3.0.dta	3811.5	1183.54	3	GLTFQQJASSM	-	2627.95	6-6-1-0-1	7,	0	0	2	0.09144	0.07498	3.19058	0.23924	b8+;b9+;	b8+;b9+;	No
MS2.12743.12743.3.1.dta	3812.5	1183.54	3	GLTFQQJASSM	-	2628.97	6-6-0-0-3	7,	0	0	2	0.09144	0.07498	3.19058	0.23924	b8+;b9+;	b8+;b9+;	No
MS2.30723.30723.3.0.dta	3958.72	1753.93	3	CANLVPVPITJATLDR	1,Carbamidomethyl[C];	2204.77	5-4-2-0-0	11,	0	0	2	0.12703	0.07622	3.13729	0.23912	b3+;b4+;	b3+;b4+;	No
MS2.32927.32927.3.1.dta	4699.01	2184.08	3	LAGKPTHVJVSVVMAEVDGTC	21,Carbamidomethyl[C];	2514.9	8-6-0-0-0	9,	0	0	4	0.07671	0.07828	3.05322	0.23901	b7+;b8+;b10+;b11+;	b8+;b10+;	No
MS2.32927.32927.3.0.dta	4698.03	2184.08	3	LAGKPTHVJVSVVMAEVDGTC	21,Carbamidomethyl[C];	2513.9	6-4-1-0-3	9,	0	0	4	0.07671	0.07828	3.05322	0.23901	b7+;b8+;b10+;b11+;	b8+;b10+;	No
MS2.26328.26328.4.1.dta	4226.78	1581.83	4	FTPJKTEDTIFLR	-	2644.96	7-6-0-0-2	4,	0	0	2	0.08459	0.07558	3.15914	0.23876	y1+;y5+;	y1+;y5+;	No
MS2.27136.27136.4.1.dta	3613.6	1408.82	4	LVPVPITJATLDR	-	2204.77	5-4-2-0-0	8,	1	0.13043	3	0.03186	0.11107	2.14519	0.23827	b3+;y1+;y9+;Y1+;	Y1+;	Yes	3	1	1
MS2.27136.27136.4.3.dta	3614.6	1408.82	4	LVPVPITJATLDR	-	2205.79	5-4-1-0-2	8,	1	0.13043	3	0.03186	0.11107	2.14519	0.23827	b3+;y1+;y9+;Y1+;	Y1+;	No
MS2.28241.28241.3.1.dta	4698.96	1891.96	3	FYFTPJKTEDTIFLR	-	2807.01	8-6-0-0-2	6,	0	0	4	0.13368	0.1151	2.06901	0.23815	y1+;y3+;y5+;y8+;	y5+;	No
MS2.4497.4497.4.2.dta	4002.58	1284.62	4	YKJNSDISSTR	-	2717.98	8-7-0-0-0	3,	1	0.00709	4	0.06312	0.10934	2.16829	0.23707	b3+;b6+;b7+;y5+;Y0+;	b7+;	No
MS2.4559.4559.3.0.dta	3637.4	993.46	3	JNSDISSTR	-	2643.94	7-6-1-0-0	1,	0	0	3	0.08139	0.10792	2.19368	0.23674	y4+;y5+;y8+;	y5+;	No
MS2.31987.31987.4.3.dta	4001.79	1795.01	4	VVLHPJYSQVDIGLIK	-	2206.81	5-4-0-0-4	6,	0	0	3	0.08414	0.07768	3.04454	0.23651	b4+;y1+;y5+;	b4+;y5+;	No
MS2.31987.31987.4.0.dta	4000.79	1795.01	4	VVLHPJYSQVDIGLIK	-	2205.79	5-4-1-0-2	6,	0	0	3	0.08414	0.07768	3.04454	0.23651	b4+;y1+;y5+;	b4+;y5+;	No
MS2.3967.3967.3.2.dta	3859.51	776.39	3	EJGTISR	-	3083.11	9-8-0-0-0	2,	3	0.11271	1	0.00979	0.10587	2.22193	0.23523	y1+;Y1+;Y2+;Y3+;	Y1+;	No
MS2.3967.3967.3.0.dta	3857.45	776.39	3	EJGTISR	-	3081.09	7-6-2-0-1	2,	3	0.11271	1	0.00979	0.10587	2.22193	0.23523	y1+;Y1+;Y2+;Y3+;	Y1+;	No
MS2.3967.3967.3.1.dta	3858.5	776.39	3	EJGTISR	-	3082.12	7-6-1-0-3	2,	3	0.11271	1	0.00979	0.10587	2.22193	0.23523	y1+;Y1+;Y2+;Y3+;	Y1+;	No
MS2.29750.29750.4.2.dta	4607.91	1581.83	4	FTPJKTEDTIFLR	-	3026.09	9-7-0-0-1	4,	0	0	3	0.11767	0.10862	2.14519	0.233	y1+;y5+;y6+;	y5+;	No
MS2.29750.29750.4.0.dta	4605.92	1581.83	4	FTPJKTEDTIFLR	-	3024.07	7-5-2-0-2	4,	0	0	3	0.11767	0.10862	2.14519	0.233	y1+;y5+;y6+;	y5+;	Yes	3	0	0
MS2.3411.3411.4.3.dta	2823.02	796.347	4	NEEYJK	-	2026.69	10-2-0-0-0	5,	2	0.02892	2	0.04896	0.10388	2.23735	0.23241	b2+;b3+;Y0+;Y0+;	b2+;	No
MS2.3683.3683.3.2.dta	3223.23	952.448	3	RNEEYJK	-	2270.79	9-4-0-0-0	6,	0	0	3	0.11349	0.10432	2.22193	0.23179	y2+;y3+;y6+;	y6+;	No
MS2.31347.31347.4.4.dta	5278.09	1581.83	4	FTPJKTEDTIFLR	-	3696.3	9-6-3-0-1	4,	0	0	6	0.06314	0.10772	2.14519	0.23108	b2+;y3+;y5+;y6+;y7+;y8+;	y5+;	No
MS2.24622.24622.3.0.dta	3344.38	1284.62	3	YKJNSDISSTR	-	2059.73	5-4-1-0-1	3,	1	0.04464	1	0.02924	0.06944	3.32193	0.23069	y5+;Y1+;	y5+;Y1+;	No
MS2.24622.24622.3.2.dta	3345.36	1284.62	3	YKJNSDISSTR	-	2060.76	5-4-0-0-3	3,	1	0.04464	1	0.02924	0.06944	3.32193	0.23069	y5+;Y1+;	y5+;Y1+;	No
MS2.12558.12558.3.0.dta	3591.4	1183.54	3	GLTFQQJASSM	-	2407.85	5-5-2-0-0	7,	0	0	2	0.08398	0.07155	3.19058	0.22828	b8+;b9+;	b8+;b9+;	No
MS2.12558.12558.3.1.dta	3592.41	1183.54	3	GLTFQQJASSM	-	2408.87	5-5-1-0-2	7,	0	0	2	0.08398	0.07155	3.19058	0.22828	b8+;b9+;	b8+;b9+;	No
MS2.29824.29824.4.2.dta	5262.16	1744.89	4	YFTPJKTEDTIFLR	-	3517.23	7-6-4-0-0	5,	2	0.06259	1	0.03045	0.07477	3.05003	0.22804	y5+;Y1+;Y1++;	y5+;Y1++;	No
MS2.23921.23921.2.2.dta	2309.96	1173.52	2	EEQFJSTYR	-	1136.42	2-4-0-0-0	5,	0	0	1	0.15138	0.10377	2.19368	0.22763	y7+;	y7+;	No
MS2.25158.25158.4.3.dta	3889.63	1593.83	4	SIJTTNVMGTSLTVR	-	2295.82	7-5-0-0-1	3,	0	0	2	0.10134	0.07258	3.1303	0.22721	y1+;y12+;	y1+;y12+;	No
MS2.25158.25158.4.2.dta	3887.61	1593.83	4	SIJTTNVMGTSLTVR	-	2293.81	5-3-2-0-2	3,	0	0	2	0.10134	0.07258	3.1303	0.22721	y1+;y12+;	y1+;y12+;	No
MS2.25880.25880.3.0.dta	3654.57	1593.83	3	SIJTTNVMGTSLTVR	-	2060.76	5-4-0-0-3	3,	1	0.07657	3	0.06655	0.10696	2.12398	0.22718	y1+;y7+;y8+;Y1+;	Y1+;	No
MS2.39668.39668.4.0.dta	5286.3	3413.63	4	SLGNVJFTVSAEALESQELCGTEVPSVPEHGR	20,Carbamidomethyl[C];	1872.65	6-3-1-0-0	6,	0	0	2	0.09713	0.07481	3.03379	0.22695	y5+;y8+;	y5+;y8+;	No
MS2.39668.39668.4.1.dta	5287.31	3413.63	4	SLGNVJFTVSAEALESQELCGTEVPSVPEHGR	20,Carbamidomethyl[C];	1873.67	6-3-0-0-2	6,	0	0	2	0.09713	0.07481	3.03379	0.22695	y5+;y8+;	y5+;y8+;	No
MS2.30590.30590.4.0.dta	4697.99	2363.14	4	LAGKPTHVJVSVVMAEVDGTCY	14,Oxidation[M];21,Carbamidomethyl[C];	2334.84	4-4-2-0-2	9,	0	0	3	0.12418	0.07443	3.02854	0.22541	y2+;y5+;y6+;	y2+;y6+;	No
MS2.6998.6998.3.1.dta	3549.44	993.46	3	JNSDISSTR	-	2555.95	5-5-0-0-5	1,	0	0	2	0.09765	0.1027	2.19368	0.22528	y5+;y7+;	y5+;	No
MS2.32797.32797.4.0.dta	5012.03	1744.89	4	YFTPJKTEDTIFLR	-	3267.16	6-7-3-0-0	5,	0	0	4	0.11991	0.10877	2.0649	0.2246	b2+;y1+;y5+;y6+;	y5+;	No
MS2.13669.13669.3.1.dta	3615.46	1555.71	3	THTJISESHPJATF	-	2059.73	5-4-1-0-1	4,	1	0.06637	1	0.04625	0.07403	3.03379	0.22459	y5+;Y1+;	y5+;Y1+;	No
MS2.30168.30168.4.3.dta	4470.9	1753.93	4	CANLVPVPITJATLDR	1,Carbamidomethyl[C];	2716.98	6-5-1-0-3	11,	0	0	3	0.08887	0.0711	3.13729	0.22305	b2+;b3+;b4+;	b2+;b3+;	No
MS2.36538.36538.2.0.dta	2652.16	1166.61	2	STGKPTLYJVS	-	1485.56	2-5-0-0-1	9,	0	0	2	0.19185	0.10227	2.16829	0.22175	b5+;y5+;	y5+;	No
MS2.4683.4683.3.1.dta	3402.31	993.46	3	JNSDISSTR	-	2408.87	5-5-1-0-2	1,	0	0	3	0.07796	0.10072	2.19368	0.22094	y1+;y4+;y5+;	y5+;	No
MS2.4683.4683.3.2.dta	3401.33	993.46	3	JNSDISSTR	-	2407.85	5-5-2-0-0	1,	0	0	3	0.07796	0.10072	2.19368	0.22094	y1+;y4+;y5+;	y5+;	No
MS2.31114.31114.4.3.dta	4145.86	1795.01	4	VVLHPJYSQVDIGLIK	-	2350.83	5-4-2-0-1	6,	2	0.0289	5	0.06599	0.10715	2.06085	0.22081	b2+;b4+;y2+;y4+;y5+;Y0+;Y1++;	b4+;	Yes	3	1	1
MS2.29812.29812.4.1.dta	4969.98	1581.83	4	FTPJKTEDTIFLR	-	3388.19	8-6-3-0-0	4,	0	0	5	0.06264	0.10275	2.14519	0.22043	y3+;y5+;y6+;y8+;y9+;	y5+;	No
MS2.9247.9247.4.4.dta	3687.45	776.39	4	EJGTISR	-	2911.03	9-5-1-0-1	2,	1	0.05436	1	0.02657	0.06731	3.26366	0.21969	y1+;Y5+;	y1+;Y5+;	No
MS2.9247.9247.3.1.dta	2764.12	776.39	3	EJGTISR	-	1987.71	6-5-0-0-0	2,	1	0.05436	1	0.02657	0.06731	3.26366	0.21969	y1+;Y5+;	y1+;Y5+;	No
MS2.31624.31624.4.1.dta	5021.18	1795.01	4	VVLHPJYSQVDIGLIK	-	3226.13	7-6-3-0-0	6,	3	0.05771	4	0.04777	0.10626	2.06085	0.21899	y1+;y4+;y5+;y6+;Y1++;Y2++;Y4++;	Y1++;	Yes	3	1	1
MS2.31624.31624.4.2.dta	5022.18	1795.01	4	VVLHPJYSQVDIGLIK	-	3227.15	7-6-2-0-2	6,	3	0.05771	4	0.04777	0.10626	2.06085	0.21899	y1+;y4+;y5+;y6+;Y1++;Y2++;Y4++;	Y1++;	No
MS2.9470.9470.2.2.dta	3015.2	1189.51	2	EEQYJSTYR	-	1825.66	5-5-0-0-0	5,	1	0.07826	1	0.02568	0.06782	3.22517	0.21874	y1+;Y2+;	y1+;Y2+;	No
MS2.16127.16127.3.1.dta	2909.15	1157.52	3	EEQFJSTFR	-	1751.62	4-4-1-0-0	5,	2	0.13892	1	0.01158	0.09324	2.34592	0.21872	y1+;Y1+;Y1+;	Y1+;	Yes	3	1	1
MS2.34656.34656.4.1.dta	5253.34	3541.72	4	SLGNVJFTVSAEALESQELCGTEVPSVPEHGRK	20,Carbamidomethyl[C];	1711.62	5-3-0-0-2	6,	0	0	2	0.08651	0.06867	3.17655	0.21812	y6+;y9+;	y6+;y9+;	No

## Sheet: 12 GPSMs in Subset I
QuerySpecName	QueryPrecursorMH	pGlycoPeptide	pGlycoMod	pGlycoGlycan	pGlycoPeptideMH	pGlycoGlycanMW	pGlycoMassDeviation	pGlcoPPM	pMatchGlycoPeptide	pMatchGlycoMod	pMatchGlycoGlycan	pMatchGlycoPeptideMH	pMatchGlycoGlycanMW	pMatchGlycoMassDeviation(da)	pMatchGlcoPPM	Target/Decoy	Peptide is identical	Glycan is identical
MS2.27650.27650.4.5.dta	4739.99	LAGKPTHVJVSVVMAEVDGTC	21,C(Carbamidomethyl[C]);	5-5-0-0-5	2184.08	2555.95	-0.0372975	-7.86862	LAGKPTHVJVSVVMAEVDGTC	21,Carbamidomethyl[C];	7-7-0-0-0	2184.08	2555.93	-0.0122	-2.57384	T	1	0
MS2.34950.34950.2.2.dta	2397.07	PVPITJATLDR	null	4-2-0-0-1	1196.66	1200.43	-0.0237375	-9.90261	PVPITJATLDR	-	4-2-0-0-1	1196.66	1200.43	-0.02375	-9.90784	T	1	1
MS2.27889.27889.4.1.dta	4287.86	LVPVPITJATLDR	null	7-5-1-0-3	1408.82	2879.04	0.00571253	1.33226	LVPVPITJATLDR	-	7-5-1-0-3	1408.82	2879.04	0.0057	1.32934	T	1	1
MS2.30785.30785.4.0.dta	4930.05	MVSHHJLTTGATLINEQW	null	7-5-2-0-1	2052	2878.02	0.0364825	7.40009	WQENILTAGTJLTHHSVM	-	7-5-2-0-1	2052	2878.02	0.03646	7.39552	D	0	1
MS2.30748.30748.4.0.dta	5076.1	MVSHHJLTTGATLINEQW	null	7-5-2-0-2	2052	3024.07	0.0308425	6.07606	WQENILTAGTJLTHHSVM	-	7-5-2-0-2	2052	3024.07	0.03082	6.07163	D	0	1
MS2.34968.34968.4.0.dta	4515.98	MVSHHJLTTGATLINEQWLL	1,M(Oxidation[M]);	6-4-1-0-1	2294.16	2221.79	0.0318325	7.04891	LLWQENILTAGTJLTHHSVM	-	7-4-1-0-0	2278.16	2237.78	0.03182	7.04614	D	0	0
MS2.4645.4645.4.0.dta	3344.39	YKJNSDISSTR	null	5-4-1-0-1	1284.62	2059.73	0.0346225	10.3525
MS2.7788.7788.3.0.dta	3249.28	EEQYJSTYR	null	5-4-1-0-1	1189.51	2059.73	0.0355625	10.9449
MS2.30887.30887.4.2.dta	4381.88	VVLHPJYSQVDIGLIK	null	7-5-1-0-1	1795.01	2586.92	-0.0542975	-12.3912
MS2.25878.25878.3.0.dta	3466.52	SIJTTNVMGTSLTVR	null	6-3-1-0-0	1593.83	1872.65	0.0390925	11.2773
MS2.33604.33604.3.0.dta	4366.99	LVPVPITJATLDQITGK	null	7-5-1-0-1	1780.02	2586.92	0.0495825	11.3541
MS2.33993.33993.4.4.dta	4674.06	PVPITJATLDQITGK	null	5-7-2-0-2	1567.87	3106.13	0.0642325	13.7425
Note:
	Peptide is identical but glycan is different between pGlyco and pMatchGlyco and filterd out under 1% FDR
	Results of pGlyco and pMatchGlyco are identical but filterd out under 1% FDR
	Output decoy results because the top 12 peaks in each query spectrum were not matched to the target results
	Did not output results because their mass errors were more than 10 ppm
