# Supplementary material for: N-Linked Glycopeptide Identification Based on Open Mass Spectral Library Search
Source: Biomed Res Int. 2018 Aug 14;2018:1564136. doi: 10.1155/2018/1564136 (PMC6112209; doi:10.1155/2018/1564136)
Supplement: Supplementary 3 — Supplementary Table S3: pMatchGlyco and GPQuest identification results of the data set of the OVCAR3 from human cell line. [file 1564136.f3.xlsx]

## Sheet: GPQuest
Fractions	Spectra Scan Number	SpectrumName	Precursor Massa	Precursor Charge	Retention Time (min)	Peptide Sequence	Glycan Composition	Glycan Composition2	Precusor Ion Mass Selection	M Oxidation	peptide/peptide+HexNAc ion count	Peptide +	Peptide ++	Peptide-HexNAc +	Peptide-HexNAc ++	b/y ion count	Glycopeptide Theoretical b+	Glycopeptide Theoretical y+	GlycanMass	PeptideMH	Index	Charge_Parse	PrecursorMH_pParse	Precursor_Identical	Library has the result	3400 cases
1	3144	SunS_13_OVCAR3_HILIC_IntactGlycopeptide_F1.3144.3144.3.0.dta	2922.28	3	17.45	AAIPSALDTNSSK	N5H3F1S0	3-5-0-1-0	-1	0	2	0	0	1	1	7	b10/	y1/y6/y7/y8/y9/y12/	1647.61	1274.67	8036	3	2922.29	1	1	1
1	3182	SunS_13_OVCAR3_HILIC_IntactGlycopeptide_F1.3182.3182.3.0.dta	3520.37	3	17.54	ANFTEIQK	N5H6F0S2	6-5-2-0-0	-2	0	2	1	0	1	0	9	b3/b5/b6/b7/	y2/y3/y4/y5/y6/	2569.9	950.47	#N/A	3	3520.38	1	0	0
1	3194	SunS_13_OVCAR3_HILIC_IntactGlycopeptide_F1.3194.3194.3.0.dta	3155.26	3	17.57	ANFTEIQK	N4H5F0S2	5-4-2-0-0	0	0	2	1	0	1	0	11	b3/b4/b5/b6/b7/	y1/y2/y3/y4/y5/y6/	2204.77	950.484	#N/A	3	3155.25	1	0	0
1	3282	SunS_13_OVCAR3_HILIC_IntactGlycopeptide_F1.3282.3282.3.0.dta	3155.26	3	17.83	ANFTEIQK	N4H5F0S2	5-4-2-0-0	-1	0	2	1	0	1	0	10	b3/b4/b5/b6/b7/	y2/y3/y4/y5/y6/	2204.77	950.486	#N/A	3	3155.27	1	0	0
1	4229	SunS_13_OVCAR3_HILIC_IntactGlycopeptide_F1.4229.4229.3.0.dta	3223.35	3	23.39	KGTNFTHLVADR	N2H9F0S0	9-2-0-0-0	-1	0	4	1	1	1	1	6	b1/	y1/y3/y6/y7/y8/	1864.63	1358.71	1451	3	3223.35	1	1	1
1	4290	SunS_13_OVCAR3_HILIC_IntactGlycopeptide_F1.4290.4290.3.0.dta	3301.35	3	23.65	AAIPSALDTNSSK	N2H10F0S0	10-2-0-0-0	0	0	3	1	0	1	1	7	b2/b3/b6/	y1/y5/y6/y10/	2026.69	1274.66	4583	3	3301.35	1	1	1
1	4295	SunS_13_OVCAR3_HILIC_IntactGlycopeptide_F1.4295.4295.3.0.dta	3223.36	3	23.66	KGTNFTHLVADR	N2H9F0S0	9-2-0-0-0	-1	0	4	1	1	1	1	7	b1/	y1/y3/y4/y5/y6/y7/	1864.63	1358.73	#N/A	3	3222.39	0	1	0
1	4351	SunS_13_OVCAR3_HILIC_IntactGlycopeptide_F1.4351.4351.3.0.dta	3301.35	3	23.9	AAIPSALDTNSSK	N2H10F0S0	10-2-0-0-0	-1	0	3	1	0	1	1	9	b2/b3/b6/b7/b11/	y1/y4/y5/y6/	2026.69	1274.67	4615	3	3301.35	1	1	1
1	4377	SunS_13_OVCAR3_HILIC_IntactGlycopeptide_F1.4377.4377.3.0.dta	3139.28	3	24.04	AAIPSALDTNSSK	N2H9F0S0	9-2-0-0-0	0	0	3	1	0	1	1	9	b2/b3/b6/b7/b9/	y5/y6/y10/y11/	1864.63	1274.65	#N/A	3	3138.35	0	1	0
1	4402	SunS_13_OVCAR3_HILIC_IntactGlycopeptide_F1.4402.4402.3.0.dta	3301.35	3	24.16	AAIPSALDTNSSK	N2H10F0S0	10-2-0-0-0	-1	0	3	1	0	1	1	6	b2/b3/b6/b7/	y1/y6/	2026.69	1274.66	4258	3	3301.35	1	1	1
1	4432	SunS_13_OVCAR3_HILIC_IntactGlycopeptide_F1.4432.4432.3.0.dta	3139.29	3	24.29	AAIPSALDTNSSK	N2H9F0S0	9-2-0-0-0	-1	0	3	1	0	1	1	14	b2/b3/b4/b6/b7/b12/	y1/y2/y3/y5/y6/y7/y9/y10/	1864.63	1274.66	2297	3	3139.3	1	1	1
1	4494	SunS_13_OVCAR3_HILIC_IntactGlycopeptide_F1.4494.4494.3.0.dta	2977.23	3	24.54	AAIPSALDTNSSK	N2H8F0S0	8-2-0-0-0	-2	0	3	1	0	1	1	6	b2/b3/b6/	y4/y5/y10/	1702.58	1274.65	4183	3	2977.25	1	1	1
1	4504	SunS_13_OVCAR3_HILIC_IntactGlycopeptide_F1.4504.4504.3.0.dta	3139.31	3	24.56	AAIPSALDTNSSK	N2H9F0S0	9-2-0-0-0	-1	0	4	1	1	1	1	14	b2/b3/b5/b6/b7/b11/	y2/y3/y4/y5/y6/y7/y9/y10/	1864.63	1274.68	2292	3	3139.3	1	1	1
1	4535	SunS_13_OVCAR3_HILIC_IntactGlycopeptide_F1.4535.4535.3.0.dta	3781.44	3	24.65	GYYNQSEDGSHTLQR	N2H10F0S0	10-2-0-0-0	-1	0	4	1	1	1	1	8	b5/	y1/y3/y4/y7/y8/y9/y10/	2026.69	1754.75	1475	3	3781.46	1	1	1
1	4594	SunS_13_OVCAR3_HILIC_IntactGlycopeptide_F1.4594.4594.3.0.dta	2977.24	3	24.82	AAIPSALDTNSSK	N2H8F0S0	8-2-0-0-0	-1	0	3	1	0	1	1	11	b2/b3/b5/b6/b11/	y2/y3/y5/y6/y7/y10/	1702.58	1274.66	2746	3	2977.24	1	1	1
1	4601	SunS_13_OVCAR3_HILIC_IntactGlycopeptide_F1.4601.4601.3.0.dta	3041.18	3	24.84	EQYIHENYSR	N2H8F0S0	8-2-0-0-0	-1	0	4	1	1	1	1	8	b2/b3/b4/b5/b6/	y1/y2/y3/	1702.58	1338.6	1222	3	3041.19	1	1	1
1	4606	SunS_13_OVCAR3_HILIC_IntactGlycopeptide_F1.4606.4606.3.0.dta	3139.29	3	24.85	AAIPSALDTNSSK	N2H9F0S0	9-2-0-0-0	-1	0	3	1	0	1	1	11	b2/b3/b6/b7/	y1/y4/y5/y6/y7/y10/y11/	1864.63	1274.65	2516	3	3139.29	1	1	1
1	4607	SunS_13_OVCAR3_HILIC_IntactGlycopeptide_F1.4607.4607.3.0.dta	3757.44	3	24.85	EHEGAIYPDNTTDFQR	N2H9F0S0	9-2-0-0-0	-1	0	3	0	1	1	1	9	b2/b3/b4/b5/b6/b7/	y1/y3/y9/	1864.63	1892.81	1606	3	3757.48	1	1	1
1	4625	SunS_13_OVCAR3_HILIC_IntactGlycopeptide_F1.4625.4625.3.0.dta	3595.42	3	24.9	EHEGAIYPDNTTDFQR	N2H8F0S0	8-2-0-0-0	-2	0	3	0	1	1	1	9	b2/b3/b4/b5/b6/b7/	y1/y3/y9/	1702.58	1892.84	1080	3	3595.42	1	1	1
1	4629	SunS_13_OVCAR3_HILIC_IntactGlycopeptide_F1.4629.4629.3.0.dta	3919.54	3	24.91	EHEGAIYPDNTTDFQR	N2H10F0S0	10-2-0-0-0	-2	0	3	0	1	1	1	7	b2/b3/b5/b6/b7/	y1/y3/	2026.69	1892.85	828	3	3919.52	1	1	1
1	4674	SunS_13_OVCAR3_HILIC_IntactGlycopeptide_F1.4674.4674.3.0.dta	2717.08	3	25.05	EQYIHENYSR	N2H6F0S0	6-2-0-0-0	-1	0	4	1	1	1	1	8	b2/b3/b4/b5/b6/	y1/y2/y3/	1378.48	1338.6	1304	3	2717.08	1	1	1
1	4685	SunS_13_OVCAR3_HILIC_IntactGlycopeptide_F1.4685.4685.3.0.dta	2977.23	3	25.09	AAIPSALDTNSSK	N2H8F0S0	8-2-0-0-0	0	0	4	1	1	1	1	12	b2/b3/b5/b6/b7/b12/	y1/y3/y5/y6/y7/y10/	1702.58	1274.65	2506	3	2977.24	1	1	1
1	4692	SunS_13_OVCAR3_HILIC_IntactGlycopeptide_F1.4692.4692.3.0.dta	3139.28	3	25.12	AAIPSALDTNSSK	N2H9F0S0	9-2-0-0-0	-1	0	3	1	0	1	1	7	b2/b3/b6/b7/	y3/y9/y10/	1864.63	1274.65	2955	3	3139.29	1	1	1
1	4693	SunS_13_OVCAR3_HILIC_IntactGlycopeptide_F1.4693.4693.3.0.dta	3757.46	3	25.12	EHEGAIYPDNTTDFQR	N2H9F0S0	9-2-0-0-0	-1	0	3	0	1	1	1	13	b2/b3/b4/b5/b6/b7/b9/	y1/y3/y4/y5/y9/y10/	1864.63	1892.83	914	3	3757.48	1	1	1
1	4709	SunS_13_OVCAR3_HILIC_IntactGlycopeptide_F1.4709.4709.3.0.dta	3595.41	3	25.16	EHEGAIYPDNTTDFQR	N2H8F0S0	8-2-0-0-0	-2	0	4	1	1	1	1	16	b2/b3/b4/b5/b6/b7/b9/	y1/y2/y3/y4/y5/y6/y7/y9/y10/	1702.58	1892.83	782	3	3595.42	1	1	1
1	4772	SunS_13_OVCAR3_HILIC_IntactGlycopeptide_F1.4772.4772.3.0.dta	3757.48	3	25.37	EHEGAIYPDNTTDFQR	N2H9F0S0	9-2-0-0-0	-1	0	3	0	1	1	1	8	b2/b3/b5/b6/b7/	y1/y3/y9/	1864.63	1892.84	1362	3	3757.48	1	1	1
1	4775	SunS_13_OVCAR3_HILIC_IntactGlycopeptide_F1.4775.4775.3.0.dta	3573.44	3	25.38	NTSVGPLYSGCR	N5H5F1S1	5-5-1-1-0	-2	0	2	1	0	1	0	6	b2/	y1/y4/y7/y8/y10/	2262.81	1310.63	3580	3	3573.43	1	1	1
1	4786	SunS_13_OVCAR3_HILIC_IntactGlycopeptide_F1.4786.4786.3.0.dta	3595.41	3	25.42	EHEGAIYPDNTTDFQR	N2H8F0S0	8-2-0-0-0	-2	0	4	1	1	1	1	17	b2/b3/b4/b5/b6/b7/b9/	y1/y2/y3/y4/y5/y6/y7/y9/y10/y11/	1702.58	1892.83	1191	3	3595.42	1	1	1
1	4787	SunS_13_OVCAR3_HILIC_IntactGlycopeptide_F1.4787.4787.4.0.dta	3573.43	4	25.42	NTSVGPLYSGCR	N5H5F1S1	5-5-1-1-0	-1	0	2	1	0	1	0	6	b2/	y1/y4/y7/y8/y10/	2262.81	1310.61	3422	4	3573.43	1	1	1
1	4792	SunS_13_OVCAR3_HILIC_IntactGlycopeptide_F1.4792.4792.4.0.dta	3595.43	4	25.43	EHEGAIYPDNTTDFQR	N2H8F0S0	8-2-0-0-0	-1	0	2	0	1	0	1	8	b2/b3/b5/b6/b7/	y1/y3/y10/	1702.58	1892.85	1313	4	3595.42	1	1	1
1	4803	SunS_13_OVCAR3_HILIC_IntactGlycopeptide_F1.4803.4803.3.0.dta	3433.37	3	25.47	EHEGAIYPDNTTDFQR	N2H7F0S0	7-2-0-0-0	-1	0	3	0	1	1	1	10	b2/b3/b5/b6/b7/	y1/y2/y3/y5/y9/	1540.53	1892.84	1208	3	3433.37	1	1	1
1	4870	SunS_13_OVCAR3_HILIC_IntactGlycopeptide_F1.4870.4870.4.0.dta	3573.42	4	25.68	NTSVGPLYSGCR	N5H5F1S1	5-5-1-1-0	0	0	2	1	0	1	0	8	b2/	y1/y4/y5/y7/y8/y9/y10/	2262.81	1310.6	2879	4	3573.43	1	1	1
1	4891	SunS_13_OVCAR3_HILIC_IntactGlycopeptide_F1.4891.4891.3.0.dta	3433.37	3	25.74	EHEGAIYPDNTTDFQR	N2H7F0S0	7-2-0-0-0	-2	0	3	0	1	1	1	13	b2/b3/b4/b5/b6/b7/	y1/y2/y3/y6/y9/y10/y11/	1540.53	1892.84	1041	3	3433.37	1	1	1
1	4907	SunS_13_OVCAR3_HILIC_IntactGlycopeptide_F1.4907.4907.3.0.dta	3271.32	3	25.78	EHEGAIYPDNTTDFQR	N2H6F0S0	6-2-0-0-0	-1	0	3	0	1	1	1	11	b2/b3/b4/b5/b6/b7/	y1/y3/y6/y9/y10/	1378.48	1892.84	1266	3	3271.31	1	1	1
1	4946	SunS_13_OVCAR3_HILIC_IntactGlycopeptide_F1.4946.4946.3.0.dta	3573.44	3	25.91	NTSVGPLYSGCR	N5H5F1S1	5-5-1-1-0	-1	0	2	1	0	1	0	6	b2/	y1/y3/y4/y7/y8/	2262.81	1310.62	3689	3	3573.43	1	1	1
1	4984	SunS_13_OVCAR3_HILIC_IntactGlycopeptide_F1.4984.4984.3.0.dta	3271.32	3	26.04	EHEGAIYPDNTTDFQR	N2H6F0S0	6-2-0-0-0	-1	0	4	1	1	1	1	18	b2/b3/b4/b5/b6/b7/b9/	y1/y2/y3/y4/y5/y6/y7/y9/y10/y11/y14/	1378.48	1892.85	1203	3	3271.31	1	1	1
1	5042	SunS_13_OVCAR3_HILIC_IntactGlycopeptide_F1.5042.5042.4.0.dta	3271.3	4	26.19	EHEGAIYPDNTTDFQR	N2H6F0S0	6-2-0-0-0	-2	0	2	0	1	0	1	8	b2/b3/b5/b6/b7/	y1/y3/y4/	1378.48	1892.83	#N/A	4	3272.31	0	1	0
1	5095	SunS_13_OVCAR3_HILIC_IntactGlycopeptide_F1.5095.5095.3.0.dta	3271.3	3	26.33	EHEGAIYPDNTTDFQR	N2H6F0S0	6-2-0-0-0	-1	0	4	1	1	1	1	19	b2/b3/b4/b5/b6/b7/b9/	y1/y2/y3/y4/y5/y6/y7/y8/y9/y10/y11/y14/	1378.48	1892.83	1373	3	3271.3	1	1	1
1	5206	SunS_13_OVCAR3_HILIC_IntactGlycopeptide_F1.5206.5206.3.0.dta	3271.31	3	26.59	EHEGAIYPDNTTDFQR	N2H6F0S0	6-2-0-0-0	-1	0	3	0	1	1	1	12	b2/b3/b4/b5/b6/b7/	y1/y3/y5/y9/y10/y11/	1378.48	1892.84	1288	3	3271.31	1	1	1
1	5525	SunS_13_OVCAR3_HILIC_IntactGlycopeptide_F1.5525.5525.3.0.dta	3298.4	3	27.47	EAGNHTSGAGLVQINK	N2H8F0S0	8-2-0-0-0	-1	0	4	1	1	1	1	15	b5/b9/b10/b12/b13/	y1/y2/y3/y4/y5/y7/y9/y10/y11/y12/	1702.58	1595.82	2840	3	3298.39	1	1	1
1	5538	SunS_13_OVCAR3_HILIC_IntactGlycopeptide_F1.5538.5538.4.0.dta	3061.3	4	27.5	KGTNFTHLVADR	N2H8F0S0	8-2-0-0-0	-1	0	4	1	1	1	1	6	b1/	y1/y3/y4/y5/y6/	1702.58	1358.72	2239	4	3061.3	1	1	1
1	5543	SunS_13_OVCAR3_HILIC_IntactGlycopeptide_F1.5543.5543.3.0.dta	3061.29	3	27.51	KGTNFTHLVADR	N2H8F0S0	8-2-0-0-0	0	0	4	1	1	1	1	10	b1/b11/	y1/y2/y3/y4/y5/y6/y7/y8/	1702.58	1358.71	2061	3	3061.29	1	1	1
1	5563	SunS_13_OVCAR3_HILIC_IntactGlycopeptide_F1.5563.5563.3.0.dta	3136.26	3	27.56	NATQHTAGYFGSDVK	N2H7F0S0	7-2-0-0-0	-1	0	4	1	1	1	1	24	b3/b4/b5/b6/b7/b8/b9/b10/b11/b13/b14/	y1/y2/y3/y4/y5/y6/y7/y8/y9/y10/y11/y12/y13/	1540.53	1595.73	10590	3	3136.27	1	0	0
1	5571	SunS_13_OVCAR3_HILIC_IntactGlycopeptide_F1.5571.5571.3.0.dta	3223.35	3	27.58	KGTNFTHLVADR	N2H9F0S0	9-2-0-0-0	0	0	4	1	1	1	1	11	b1/b4/b11/	y1/y2/y3/y4/y5/y6/y7/y8/	1864.63	1358.72	813	3	3223.35	1	1	1
1	5572	SunS_13_OVCAR3_HILIC_IntactGlycopeptide_F1.5572.5572.4.0.dta	3223.36	4	27.58	KGTNFTHLVADR	N2H9F0S0	9-2-0-0-0	-2	0	4	1	1	1	1	11	b1/b5/b11/	y1/y2/y3/y4/y5/y6/y7/y8/	1864.63	1358.73	1018	4	3223.35	1	1	1
1	5620	SunS_13_OVCAR3_HILIC_IntactGlycopeptide_F1.5620.5620.5.0.dta	4311.81	5	27.7	YPHKPEINSTTHPGADLR	N5H6F0S1	6-5-1-0-0	-2	0	2	0	1	0	1	6	b3/b4/	y1/y2/y6/y14/	2278.81	2033	7685	5	4311.82	1	1	1
1	5647	SunS_13_OVCAR3_HILIC_IntactGlycopeptide_F1.5647.5647.4.0.dta	3061.3	4	27.76	KGTNFTHLVADR	N2H8F0S0	8-2-0-0-0	0	0	4	1	1	1	1	6	b1/	y1/y3/y4/y6/y7/	1702.58	1358.72	1886	4	3061.3	1	1	1
1	5651	SunS_13_OVCAR3_HILIC_IntactGlycopeptide_F1.5651.5651.4.0.dta	4311.83	4	27.77	YPHKPEINSTTHPGADLR	N5H6F0S1	6-5-1-0-0	-2	0	2	0	1	0	1	9	b3/b4/b8/	y1/y2/y6/y7/y8/y14/	2278.81	2033.02	4903	4	4311.82	1	1	1
1	5659	SunS_13_OVCAR3_HILIC_IntactGlycopeptide_F1.5659.5659.4.0.dta	3946.68	4	27.79	YPHKPEINSTTHPGADLR	N4H5F0S1	5-4-1-0-0	-3	0	2	0	1	0	1	8	b3/b4/	y1/y2/y4/y6/y10/y14/	1913.68	2033	5428	4	3946.69	1	1	1
1	5666	SunS_13_OVCAR3_HILIC_IntactGlycopeptide_F1.5666.5666.3.0.dta	2899.24	3	27.81	KGTNFTHLVADR	N2H7F0S0	7-2-0-0-0	-1	0	4	1	1	1	1	8	b1/	y1/y3/y4/y5/y6/y7/y8/	1540.53	1358.71	1933	3	2899.24	1	1	1
1	5691	SunS_13_OVCAR3_HILIC_IntactGlycopeptide_F1.5691.5691.5.0.dta	3946.69	5	27.87	YPHKPEINSTTHPGADLR	N4H5F0S1	5-4-1-0-0	-2	0	2	0	1	0	1	9	b3/b4/	y1/y2/y5/y6/y7/y8/y14/	1913.68	2033.01	5372	5	3946.69	1	1	1
1	5735	SunS_13_OVCAR3_HILIC_IntactGlycopeptide_F1.5735.5735.4.0.dta	3223.35	4	27.98	KGTNFTHLVADR	N2H9F0S0	9-2-0-0-0	-1	0	4	1	1	1	1	8	b1/	y1/y3/y4/y5/y6/y7/y8/	1864.63	1358.72	1757	4	3223.35	1	1	1
1	5768	SunS_13_OVCAR3_HILIC_IntactGlycopeptide_F1.5768.5768.4.0.dta	3061.29	4	28.06	KGTNFTHLVADR	N2H8F0S0	8-2-0-0-0	-1	0	4	1	1	1	1	6	b1/	y1/y3/y4/y5/y6/	1702.58	1358.71	921	4	3061.3	1	1	1
1	5944	SunS_13_OVCAR3_HILIC_IntactGlycopeptide_F1.5944.5944.3.0.dta	3228.32	3	28.5	YNHTGQVIIYR	N2H9F0S0	9-2-0-0-0	-1	0	4	1	1	1	1	6		y1/y2/y3/y7/y8/y9/	1864.63	1363.69	1957	3	3228.33	1	1	1
1	6060	SunS_13_OVCAR3_HILIC_IntactGlycopeptide_F1.6060.6060.3.0.dta	2977.24	3	28.78	AAIPSALDTNSSK	N2H8F0S0	8-2-0-0-0	-1	0	3	1	0	1	1	6	b2/b3/b6/	y1/y3/y10/	1702.58	1274.66	4068	3	2977.23	1	1	1
1	6081	SunS_13_OVCAR3_HILIC_IntactGlycopeptide_F1.6081.6081.3.0.dta	2820.17	3	28.83	VQPFNVTQGK	N2H8F0S0	8-2-0-0-0	0	0	3	1	0	1	1	7	b2/b6/	y2/y4/y5/y6/y8/	1702.58	1117.59	1762	3	2820.17	1	1	1
1	6251	SunS_13_OVCAR3_HILIC_IntactGlycopeptide_F1.6251.6251.3.0.dta	2658.13	3	29.24	VQPFNVTQGK	N2H7F0S0	7-2-0-0-0	0	0	4	1	1	1	1	11	b2/b6/b7/b9/	y1/y2/y3/y4/y5/y6/y8/	1540.53	1117.6	1282	3	2658.13	1	1	1
1	6281	SunS_13_OVCAR3_HILIC_IntactGlycopeptide_F1.6281.6281.3.0.dta	2815.18	3	29.31	AAIPSALDTNSSK	N2H7F0S0	7-2-0-0-0	-1	0	3	1	0	1	1	6	b2/b3/b6/	y1/y6/y10/	1540.53	1274.65	3460	3	2815.19	1	1	1
1	6515	SunS_13_OVCAR3_HILIC_IntactGlycopeptide_F1.6515.6515.3.0.dta	3583.47	3	29.87	INTTADEKDPTNPFR	N2H9F0S0	9-2-0-0-0	-1	0	4	1	1	1	1	14	b3/b6/b7/b9/	y1/y3/y6/y7/y8/y9/y10/y11/y12/y13/	1864.63	1718.84	2399	3	3583.46	1	1	1
1	6563	SunS_13_OVCAR3_HILIC_IntactGlycopeptide_F1.6563.6563.4.0.dta	3583.45	4	30	INTTADEKDPTNPFR	N2H9F0S0	9-2-0-0-0	-2	0	4	1	1	1	1	16	b2/b3/b6/b9/	y1/y3/y4/y5/y6/y7/y8/y9/y10/y11/y12/y13/	1864.63	1718.82	634	4	3583.46	1	1	1
1	6594	SunS_13_OVCAR3_HILIC_IntactGlycopeptide_F1.6594.6594.4.0.dta	4032.68	4	30.07	GHAHLAALVNHESYNFSHR	N3H6F0S1	6-3-1-0-0	-2	0	2	0	1	0	1	11	b2/b3/b4/b5/b6/b7/b8/b9/	y1/y3/y7/	1872.65	2160.03	#N/A	4	4033.7	0	1	0
1	6621	SunS_13_OVCAR3_HILIC_IntactGlycopeptide_F1.6621.6621.3.0.dta	3583.46	3	30.14	INTTADEKDPTNPFR	N2H9F0S0	9-2-0-0-0	-1	0	4	1	1	1	1	19	b2/b3/b6/b7/b8/b9/b10/	y1/y2/y3/y4/y6/y7/y8/y9/y10/y11/y12/y13/	1864.63	1718.83	891	3	3583.46	1	1	1
1	6629	SunS_13_OVCAR3_HILIC_IntactGlycopeptide_F1.6629.6629.3.0.dta	2957.21	3	30.16	NISQVLEK	N2H10F0S0	10-2-0-0-0	-1	0	4	1	1	1	1	13	b2/b3/b4/b5/b6/b7/	y1/y2/y3/y4/y5/y6/y7/	2026.69	930.521	#N/A	3	2957.21	1	0	0
1	6681	SunS_13_OVCAR3_HILIC_IntactGlycopeptide_F1.6681.6681.4.0.dta	4833.94	4	30.28	LRNPCTSEQNCTSPFSYK	N6H7F2S0	7-6-0-2-0	-2	0	2	0	1	0	1	6	b5/b7/b9/b12/	y5/y7/	2644.96	2188.98	7291	4	4833.94	1	1	1
1	6682	SunS_13_OVCAR3_HILIC_IntactGlycopeptide_F1.6682.6682.3.0.dta	2795.16	3	30.28	NISQVLEK	N2H9F0S0	9-2-0-0-0	-1	0	4	1	1	1	1	13	b2/b3/b4/b5/b6/b7/	y1/y2/y3/y4/y5/y6/y7/	1864.63	930.528	2358	3	2795.16	1	0	0
1	6731	SunS_13_OVCAR3_HILIC_IntactGlycopeptide_F1.6731.6731.3.0.dta	3583.47	3	30.4	INTTADEKDPTNPFR	N2H9F0S0	9-2-0-0-0	-1	0	4	1	1	1	1	11	b3/b9/	y1/y3/y6/y7/y8/y9/y10/y11/y12/	1864.63	1718.84	1837	3	3583.46	1	1	1
1	6734	SunS_13_OVCAR3_HILIC_IntactGlycopeptide_F1.6734.6734.3.0.dta	3301.35	3	30.41	AAIPSALDTNSSK	N2H10F0S0	10-2-0-0-0	-1	0	3	1	0	1	1	13	b2/b3/b4/b6/b7/b9/	y3/y4/y5/y6/y7/y8/y10/	2026.69	1274.66	2528	3	3301.35	1	1	1
1	6744	SunS_13_OVCAR3_HILIC_IntactGlycopeptide_F1.6744.6744.4.0.dta	3359.45	4	30.43	THNLTDLSPHLR	N5H4F2S0	4-5-0-2-0	-1	0	4	1	1	1	1	9	b2/b7/	y1/y4/y5/y6/y7/y8/y9/	1955.72	1403.72	1237	4	3359.46	1	1	1
1	6754	SunS_13_OVCAR3_HILIC_IntactGlycopeptide_F1.6754.6754.5.0.dta	4131.72	5	30.46	FTFTSHTPGEHQICLHSNSTK	N2H8F0S0	8-2-0-0-0	0	0	2	0	1	0	1	21	b2/b4/b5/b6/b7/b10/b11/b12/b13/b15/b16/	y1/y2/y3/y4/y5/y6/y7/y8/y9/y14/	1702.58	2429.14	3993	5	4131.72	1	1	1
1	6757	SunS_13_OVCAR3_HILIC_IntactGlycopeptide_F1.6757.6757.3.0.dta	3318.43	3	30.47	THNLTDLSPHLR	N4H5F2S0	5-4-0-2-0	-1	0	4	1	1	1	1	11	b2/b4/b7/	y1/y4/y5/y6/y7/y8/y9/y10/	1914.7	1403.73	3618	3	3318.43	1	1	1
1	6771	SunS_13_OVCAR3_HILIC_IntactGlycopeptide_F1.6771.6771.4.0.dta	3318.43	4	30.5	THNLTDLSPHLR	N4H5F2S0	5-4-0-2-0	-1	0	4	1	1	1	1	13	b1/b2/b4/b7/	y1/y2/y4/y5/y6/y7/y8/y9/y10/	1914.7	1403.73	595	4	3318.43	1	1	1
1	6776	SunS_13_OVCAR3_HILIC_IntactGlycopeptide_F1.6776.6776.5.0.dta	4293.76	5	30.51	FTFTSHTPGEHQICLHSNSTK	N2H9F0S0	9-2-0-0-0	-2	0	2	0	1	0	1	9	b2/b6/b7/b10/b11/b16/	y1/y8/y9/	1864.63	2429.13	6249	5	4293.76	1	1	1
1	6780	SunS_13_OVCAR3_HILIC_IntactGlycopeptide_F1.6780.6780.4.0.dta	3521.49	4	30.52	THNLTDLSPHLR	N5H5F2S0	5-5-0-2-0	-1	0	4	1	1	1	1	11	b2/b4/b7/	y1/y4/y5/y6/y7/y8/y9/y10/	2117.78	1403.72	505	4	3521.51	1	1	1
1	6783	SunS_13_OVCAR3_HILIC_IntactGlycopeptide_F1.6783.6783.3.0.dta	3359.45	3	30.53	THNLTDLSPHLR	N5H4F2S0	4-5-0-2-0	-2	0	4	1	1	1	1	9	b2/b7/	y1/y4/y5/y6/y7/y8/y9/	1955.72	1403.73	1621	3	3359.46	1	1	1
1	6794	SunS_13_OVCAR3_HILIC_IntactGlycopeptide_F1.6794.6794.4.0.dta	4131.71	4	30.56	FTFTSHTPGEHQICLHSNSTK	N2H8F0S0	8-2-0-0-0	-2	0	2	0	1	0	1	24	b2/b3/b4/b5/b6/b7/b9/b10/b11/b12/b13/b15/b16/	y1/y2/y3/y4/y5/y6/y8/y9/y10/y11/y14/	1702.58	2429.13	4667	4	4131.71	1	1	1
1	6796	SunS_13_OVCAR3_HILIC_IntactGlycopeptide_F1.6796.6796.4.0.dta	3969.65	4	30.56	FTFTSHTPGEHQICLHSNSTK	N2H7F0S0	7-2-0-0-0	-1	0	2	0	1	0	1	25	b2/b3/b4/b5/b6/b7/b8/b9/b10/b11/b12/b13/b15/b16/	y1/y2/y3/y4/y5/y6/y7/y8/y9/y10/y14/	1540.53	2429.12	3828	4	3969.65	1	1	1
1	6797	SunS_13_OVCAR3_HILIC_IntactGlycopeptide_F1.6797.6797.3.0.dta	4131.71	3	30.56	FTFTSHTPGEHQICLHSNSTK	N2H8F0S0	8-2-0-0-0	-2	0	4	1	1	1	1	21	b2/b4/b5/b6/b7/b9/b10/b11/b12/b13/b15/b16/	y1/y3/y4/y5/y6/y8/y9/y13/y14/	1702.58	2429.13	4764	3	4131.7	1	1	1
1	6801	SunS_13_OVCAR3_HILIC_IntactGlycopeptide_F1.6801.6801.4.0.dta	4384.86	4	30.57	FTFTSHTPGEHQICLHSNSTK	N5H4F2S0	4-5-0-2-0	-2	0	2	0	1	0	1	7	b6/b7/b10/b12/b13/b15/	y8/	1955.72	2429.14	12639	4	4386.86	0	1	0
1	6824	SunS_13_OVCAR3_HILIC_IntactGlycopeptide_F1.6824.6824.5.0.dta	3807.59	5	30.63	FTFTSHTPGEHQICLHSNSTK	N2H6F0S0	6-2-0-0-0	-2	0	2	0	1	0	1	14	b2/b3/b4/b6/b7/b10/b16/	y1/y3/y5/y6/y8/y9/y14/	1378.48	2429.11	3917	5	3807.6	1	1	1
1	6836	SunS_13_OVCAR3_HILIC_IntactGlycopeptide_F1.6836.6836.5.0.dta	3969.65	5	30.66	FTFTSHTPGEHQICLHSNSTK	N2H7F0S0	7-2-0-0-0	0	0	2	0	1	0	1	19	b2/b4/b6/b7/b10/b11/b12/b13/b16/	y1/y2/y3/y4/y5/y6/y8/y9/y10/y14/	1540.53	2429.12	3773	5	3969.66	1	1	1
1	6838	SunS_13_OVCAR3_HILIC_IntactGlycopeptide_F1.6838.6838.5.0.dta	4181.77	5	30.66	FTFTSHTPGEHQICLHSNSTK	N4H4F2S0	4-4-0-2-0	-1	0	2	0	1	0	1	10	b2/b5/b6/b7/b10/b11/b12/b13/	y8/y14/	1752.64	2429.13	5701	5	4181.77	1	1	1
1	6841	SunS_13_OVCAR3_HILIC_IntactGlycopeptide_F1.6841.6841.3.0.dta	3969.67	3	30.67	FTFTSHTPGEHQICLHSNSTK	N2H7F0S0	7-2-0-0-0	0	0	2	0	1	0	1	19	b2/b4/b6/b7/b10/b11/b12/b13/b14/b15/b16/	y1/y4/y5/y6/y7/y8/y9/y14/	1540.53	2429.14	4396	3	3969.65	1	1	1
1	6856	SunS_13_OVCAR3_HILIC_IntactGlycopeptide_F1.6856.6856.3.0.dta	3583.47	3	30.7	INTTADEKDPTNPFR	N2H9F0S0	9-2-0-0-0	-1	0	4	1	1	1	1	13	b2/b9/	y1/y3/y4/y6/y7/y8/y9/y10/y11/y12/y13/	1864.63	1718.83	786	3	3583.46	1	1	1
1	6858	SunS_13_OVCAR3_HILIC_IntactGlycopeptide_F1.6858.6858.5.0.dta	4279.82	5	30.71	FTFTSHTPGEHQICLHSNSTK	N6H3F1S0	3-6-0-1-0	0	0	3	0	1	1	1	12	b2/b6/b7/b10/b11/b12/b13/b16/	y6/y8/y9/y14/	1850.69	2429.13	5931	5	4279.82	1	1	1
1	6859	SunS_13_OVCAR3_HILIC_IntactGlycopeptide_F1.6859.6859.4.0.dta	4279.81	4	30.71	FTFTSHTPGEHQICLHSNSTK	N6H3F1S0	3-6-0-1-0	0	0	3	0	1	1	1	14	b2/b4/b6/b7/b10/b11/b12/b13/b15/b16/	y5/y6/y8/y14/	1850.69	2429.12	5449	4	4279.82	1	1	1
1	6860	SunS_13_OVCAR3_HILIC_IntactGlycopeptide_F1.6860.6860.5.0.dta	4076.73	5	30.71	FTFTSHTPGEHQICLHSNSTK	N5H3F1S0	3-5-0-1-0	-2	0	2	0	1	0	1	18	b2/b6/b7/b10/b11/b12/b13/b14/b15/b16/	y1/y4/y5/y6/y8/y9/y11/y14/	1647.61	2429.12	5154	5	4076.74	1	1	1
1	6864	SunS_13_OVCAR3_HILIC_IntactGlycopeptide_F1.6864.6864.4.0.dta	3156.38	4	30.72	THNLTDLSPHLR	N4H4F2S0	4-4-0-2-0	0	0	4	1	1	1	1	13	b2/b3/b6/b7/b8/	y1/y4/y5/y6/y7/y8/y9/y10/	1752.64	1403.73	434	4	3156.38	1	1	1
1	6873	SunS_13_OVCAR3_HILIC_IntactGlycopeptide_F1.6873.6873.3.0.dta	2795.15	3	30.74	NISQVLEK	N2H9F0S0	9-2-0-0-0	0	0	2	1	0	1	0	6	b2/b5/b6/	y3/y5/y6/	1864.63	930.513	#N/A	3	2795.16	1	0	0
1	6878	SunS_13_OVCAR3_HILIC_IntactGlycopeptide_F1.6878.6878.4.0.dta	4076.75	4	30.76	FTFTSHTPGEHQICLHSNSTK	N5H3F1S0	3-5-0-1-0	0	0	4	1	1	1	1	21	b2/b4/b5/b6/b7/b9/b10/b11/b12/b13/b14/b15/b16/	y1/y3/y4/y5/y6/y8/y9/y14/	1647.61	2429.14	5326	4	4076.74	1	1	1
1	6888	SunS_13_OVCAR3_HILIC_IntactGlycopeptide_F1.6888.6888.3.0.dta	3156.4	3	30.78	THNLTDLSPHLR	N4H4F2S0	4-4-0-2-0	-1	0	4	1	1	1	1	8	b2/b7/	y1/y4/y5/y6/y8/y9/	1752.64	1403.75	1703	3	3156.38	1	1	1
1	6892	SunS_13_OVCAR3_HILIC_IntactGlycopeptide_F1.6892.6892.4.0.dta	3873.65	4	30.79	FTFTSHTPGEHQICLHSNSTK	N4H3F1S0	3-4-0-1-0	-1	0	2	0	1	0	1	13	b6/b7/b10/b11/b12/b13/b15/b16/	y4/y5/y6/y8/y14/	1444.53	2429.12	5240	4	3873.66	1	1	1
1	6902	SunS_13_OVCAR3_HILIC_IntactGlycopeptide_F1.6902.6902.3.0.dta	2633.1	3	30.82	NISQVLEK	N2H8F0S0	8-2-0-0-0	-1	0	3	1	0	1	1	13	b2/b3/b4/b5/b6/b7/	y1/y2/y3/y4/y5/y6/y7/	1702.58	930.52	#N/A	3	2633.11	1	0	0
1	6942	SunS_13_OVCAR3_HILIC_IntactGlycopeptide_F1.6942.6942.5.0.dta	3873.66	5	30.91	FTFTSHTPGEHQICLHSNSTK	N4H3F1S0	3-4-0-1-0	-1	0	2	0	1	0	1	11	b2/b6/b7/b10/b11/b12/	y5/y6/y8/y9/y14/	1444.53	2429.12	6225	5	3873.66	1	1	1
1	6945	SunS_13_OVCAR3_HILIC_IntactGlycopeptide_F1.6945.6945.3.0.dta	3873.64	3	30.92	FTFTSHTPGEHQICLHSNSTK	N4H3F1S0	3-4-0-1-0	-2	0	2	0	1	0	1	8	b6/b7/b10/b12/b13/b15/	y5/y6/	1444.53	2429.11	4772	3	3873.66	1	1	1
1	6946	SunS_13_OVCAR3_HILIC_IntactGlycopeptide_F1.6946.6946.5.0.dta	4145.69	5	30.92	FTFTSHTPGDHQICLHSNSTR	N2H8F0S0	8-2-0-0-0	-2	0	2	0	1	0	1	8	b2/b4/b6/b7/b10/b11/	y1/y6/	1702.58	2443.11	5019	5	4145.7	1	1	1
1	7010	SunS_13_OVCAR3_HILIC_IntactGlycopeptide_F1.7010.7010.3.0.dta	3271.32	3	31.07	EHEGAIYPDNTTDFQR	N2H6F0S0	6-2-0-0-0	-1	0	4	1	1	1	1	16	b2/b3/b4/b5/b6/b7/b9/	y1/y2/y3/y4/y5/y6/y7/y9/y10/	1378.48	1892.84	742	3	3271.31	1	1	1
1	7061	SunS_13_OVCAR3_HILIC_IntactGlycopeptide_F1.7061.7061.4.0.dta	3562.52	4	31.2	YKGLNLTEDTYKPR	N2H9F0S0	9-2-0-0-0	0	0	4	1	1	1	1	15	b1/b2/b4/b10/	y1/y2/y3/y4/y5/y6/y7/y8/y9/y10/y12/	1864.63	1697.89	3944	4	3562.52	1	1	1
1	7079	SunS_13_OVCAR3_HILIC_IntactGlycopeptide_F1.7079.7079.4.0.dta	3400.46	4	31.24	YKGLNLTEDTYKPR	N2H8F0S0	8-2-0-0-0	-1	0	4	1	1	1	1	12	b2/b6/b10/	y1/y2/y3/y5/y6/y7/y8/y9/y10/	1702.58	1697.88	2555	4	3400.47	1	1	1
1	7092	SunS_13_OVCAR3_HILIC_IntactGlycopeptide_F1.7092.7092.3.0.dta	3400.45	3	31.27	YKGLNLTEDTYKPR	N2H8F0S0	8-2-0-0-0	0	0	4	1	1	1	1	13	b2/b4/b6/b10/	y1/y2/y5/y6/y7/y8/y9/y10/y12/	1702.58	1697.87	2993	3	3400.47	1	1	1
1	7095	SunS_13_OVCAR3_HILIC_IntactGlycopeptide_F1.7095.7095.3.0.dta	3298.26	3	31.28	NPCTSEQNCTSPFSYK	N2H6F0S0	6-2-0-0-0	-1	0	4	1	1	1	1	13	b3/b4/b5/b7/	y1/y2/y3/y5/y6/y7/y8/y9/y12/	1378.48	1919.78	1035	3	3298.26	1	1	1
1	7139	SunS_13_OVCAR3_HILIC_IntactGlycopeptide_F1.7139.7139.3.0.dta	3265.32	3	31.4	EQINITLDHR	N2H10F0S0	10-2-0-0-0	-1	0	4	1	1	1	1	10	b2/b4/b5/	y1/y2/y3/y4/y5/y6/y7/	2026.69	1238.63	110	3	3265.32	1	1	1
1	7142	SunS_13_OVCAR3_HILIC_IntactGlycopeptide_F1.7142.7142.3.0.dta	3103.28	3	31.4	EQINITLDHR	N2H9F0S0	9-2-0-0-0	0	0	4	1	1	1	1	11	b2/b3/b5/	y1/y2/y3/y4/y5/y6/y7/y8/	1864.63	1238.64	25	3	3103.28	1	1	1
1	7158	SunS_13_OVCAR3_HILIC_IntactGlycopeptide_F1.7158.7158.3.0.dta	3072.3	3	31.44	ANESRLEEADQLYR	N2H6F0S0	6-2-0-0-0	-1	0	2	0	1	0	1	7	b2/	y1/y3/y4/y6/y7/y9/	1378.48	1693.82	6363	3	3072.29	1	1	1
1	7164	SunS_13_OVCAR3_HILIC_IntactGlycopeptide_F1.7164.7164.3.0.dta	3554.51	3	31.46	LENITTGTYTIHAQK	N2H9F0S0	9-2-0-0-0	-1	0	4	1	1	1	1	22	b2/b3/b4/b5/b6/b8/b9/b12/b13/	y1/y2/y3/y4/y5/y6/y7/y8/y9/y10/y11/y12/y13/	1864.63	1689.88	977	3	3554.51	1	1	1
1	7182	SunS_13_OVCAR3_HILIC_IntactGlycopeptide_F1.7182.7182.4.0.dta	3554.51	4	31.51	LENITTGTYTIHAQK	N2H9F0S0	9-2-0-0-0	-2	0	4	1	1	1	1	14	b2/b3/b4/	y1/y2/y3/y4/y5/y6/y7/y9/y10/y11/y12/	1864.63	1689.87	776	4	3554.52	1	1	1
1	7214	SunS_13_OVCAR3_HILIC_IntactGlycopeptide_F1.7214.7214.3.0.dta	3392.45	3	31.59	LENITTGTYTIHAQK	N2H8F0S0	8-2-0-0-0	-1	0	4	1	1	1	1	25	b2/b3/b4/b5/b6/b7/b8/b9/b11/b12/b13/b14/	y1/y2/y3/y4/y5/y6/y7/y8/y9/y10/y11/y12/y13/	1702.58	1689.87	788	3	3392.46	1	1	1
1	7267	SunS_13_OVCAR3_HILIC_IntactGlycopeptide_F1.7267.7267.3.0.dta	3230.4	3	31.71	LENITTGTYTIHAQK	N2H7F0S0	7-2-0-0-0	-2	0	4	1	1	1	1	19	b2/b3/b4/b5/b6/b12/	y1/y2/y3/y4/y5/y6/y7/y8/y9/y10/y11/y12/y13/	1540.53	1689.87	607	3	3230.41	1	1	1
1	7271	SunS_13_OVCAR3_HILIC_IntactGlycopeptide_F1.7271.7271.3.0.dta	3068.34	3	31.72	LENITTGTYTIHAQK	N2H6F0S0	6-2-0-0-0	0	0	2	0	0	1	1	8	b3/b4/	y3/y4/y6/y9/y10/y11/	1378.48	1689.87	4679	3	3068.36	1	1	1
1	7276	SunS_13_OVCAR3_HILIC_IntactGlycopeptide_F1.7276.7276.3.0.dta	3554.5	3	31.73	LENITTGTYTIHAQK	N2H9F0S0	9-2-0-0-0	-2	0	4	1	1	1	1	17	b2/b3/b4/b5/	y1/y2/y3/y4/y5/y6/y7/y8/y9/y10/y11/y12/y13/	1864.63	1689.86	1031	3	3554.51	1	1	1
1	7277	SunS_13_OVCAR3_HILIC_IntactGlycopeptide_F1.7277.7277.3.0.dta	3103.28	3	31.74	EQINITLDHR	N2H9F0S0	9-2-0-0-0	0	0	4	1	1	1	1	8	b2/b5/	y1/y2/y3/y4/y5/y6/	1864.63	1238.65	93	3	3103.28	1	1	1
1	7333	SunS_13_OVCAR3_HILIC_IntactGlycopeptide_F1.7333.7333.3.0.dta	3392.46	3	31.88	LENITTGTYTIHAQK	N2H8F0S0	8-2-0-0-0	0	0	4	1	1	1	1	15	b2/b3/b4/	y1/y2/y3/y4/y5/y6/y7/y8/y9/y10/y11/y12/	1702.58	1689.88	693	3	3392.46	1	1	1
1	7345	SunS_13_OVCAR3_HILIC_IntactGlycopeptide_F1.7345.7345.3.0.dta	2744.25	3	31.9	LENITTGTYTIHAQK	N2H4F0S0	4-2-0-0-0	-2	0	4	1	1	1	1	8	b2/b3/b4/	y3/y4/y9/y10/y11/	1054.37	1689.88	2217	3	2744.25	1	1	1
1	7376	SunS_13_OVCAR3_HILIC_IntactGlycopeptide_F1.7376.7376.3.0.dta	3230.4	3	31.98	LENITTGTYTIHAQK	N2H7F0S0	7-2-0-0-0	-1	0	4	1	1	1	1	19	b2/b3/b4/b5/b6/b14/	y1/y2/y3/y4/y5/y6/y7/y8/y9/y10/y11/y12/y13/	1540.53	1689.87	555	3	3230.41	1	1	1
1	7381	SunS_13_OVCAR3_HILIC_IntactGlycopeptide_F1.7381.7381.3.0.dta	2849.16	3	31.99	TCDWLPKPNMSASCK	N2H4F0S0	4-2-0-0-0	-1	0	2	0	1	0	1	10	b2/b3/b4/b5/	y1/y2/y3/y4/y5/y10/	1054.37	1794.79	3474	3	2849.17	1	0	0
1	7389	SunS_13_OVCAR3_HILIC_IntactGlycopeptide_F1.7389.7389.4.0.dta	3576.56	4	32.01	VQYNTTIAHVTLDKDR	N2H8F0S0	8-2-0-0-0	-1	0	2	0	1	0	1	7	b2/	y1/y3/y6/y8/y9/y11/	1702.58	1873.98	3741	4	3576.56	1	1	1
1	7396	SunS_13_OVCAR3_HILIC_IntactGlycopeptide_F1.7396.7396.3.0.dta	3068.35	3	32.02	LENITTGTYTIHAQK	N2H6F0S0	6-2-0-0-0	0	0	4	1	1	1	1	21	b2/b3/b4/b5/b6/b7/b8/b14/	y1/y2/y3/y4/y5/y6/y7/y8/y9/y10/y11/y12/y13/	1378.48	1689.88	793	3	3068.35	1	1	1
1	7410	SunS_13_OVCAR3_HILIC_IntactGlycopeptide_F1.7410.7410.3.0.dta	3554.52	3	32.06	LENITTGTYTIHAQK	N2H9F0S0	9-2-0-0-0	-1	0	4	1	1	1	1	12	b2/b3/b4/	y1/y2/y3/y4/y7/y9/y10/y11/y13/	1864.63	1689.88	772	3	3554.51	1	1	1
1	7430	SunS_13_OVCAR3_HILIC_IntactGlycopeptide_F1.7430.7430.3.0.dta	2906.3	3	32.1	LENITTGTYTIHAQK	N2H5F0S0	5-2-0-0-0	0	0	4	1	1	1	1	16	b2/b3/b4/	y1/y2/y3/y4/y5/y6/y7/y8/y9/y10/y11/y12/y13/	1216.42	1689.88	585	3	2906.3	1	1	1
1	7484	SunS_13_OVCAR3_HILIC_IntactGlycopeptide_F1.7484.7484.3.0.dta	2906.22	3	32.23	NITIVTGAPR	N2H9F0S0	9-2-0-0-0	-1	0	2	1	0	1	0	13	b2/b3/b4/b8/	y1/y2/y3/y4/y5/y6/y7/y8/y9/	1864.63	1041.59	647	3	2906.23	1	1	1
1	7501	SunS_13_OVCAR3_HILIC_IntactGlycopeptide_F1.7501.7501.3.0.dta	2849.17	3	32.27	TCDWLPKPNMSASCK	N2H4F0S0	4-2-0-0-0	0	0	4	1	1	1	1	17	b2/b3/b4/b5/b6/b7/b8/b10/	y1/y2/y3/y4/y5/y8/y9/y10/y12/	1054.37	1794.8	3096	3	2849.17	1	0	0
1	7522	SunS_13_OVCAR3_HILIC_IntactGlycopeptide_F1.7522.7522.3.0.dta	3068.32	3	32.32	NITIVTGAPR	N2H10F0S0	10-2-0-0-0	-2	0	2	1	0	1	0	9	b2/b4/	y1/y2/y4/y5/y6/y7/y8/	2026.69	1041.64	#N/A	3	3070.35	0	1	0
1	7628	SunS_13_OVCAR3_HILIC_IntactGlycopeptide_F1.7628.7628.3.0.dta	2687.1	3	32.57	TCDWLPKPNMSASCK	N2H3F0S0	3-2-0-0-0	0	0	3	1	1	0	1	16	b2/b3/b4/b5/b6/b7/b8/b10/	y1/y2/y3/y4/y5/y8/y10/y12/	892.317	1794.79	#N/A	3	2687.11	1	0	0
1	7653	SunS_13_OVCAR3_HILIC_IntactGlycopeptide_F1.7653.7653.4.0.dta	3770.58	4	32.62	SVHGGVPQNVSLWAHR	N2H10F0S0	10-2-0-0-0	-2	0	4	1	1	1	1	15	b3/b4/b5/b6/b8/b10/	y1/y2/y3/y4/y5/y6/y7/y8/y10/	2026.69	1743.9	3293	4	3770.58	1	1	1
1	7654	SunS_13_OVCAR3_HILIC_IntactGlycopeptide_F1.7654.7654.4.0.dta	3608.51	4	32.62	SVHGGVPQNVSLWAHR	N2H9F0S0	9-2-0-0-0	0	0	4	1	1	1	1	15	b3/b4/b5/b6/b8/b10/	y1/y2/y3/y4/y5/y6/y7/y8/y10/	1864.63	1743.88	4304	4	3608.52	1	1	1
1	7741	SunS_13_OVCAR3_HILIC_IntactGlycopeptide_F1.7741.7741.4.0.dta	3504.65	4	32.83	IAPASNVSHTVVLRPLK	N2H8F0S0	8-2-0-0-0	0	0	4	1	1	1	1	13	b2/b4/b7/	y3/y4/y5/y6/y7/y8/y9/y10/y11/y15/	1702.58	1802.07	#N/A	4	3504.65	1	1	1
1	7747	SunS_13_OVCAR3_HILIC_IntactGlycopeptide_F1.7747.7747.4.0.dta	3666.7	4	32.85	IAPASNVSHTVVLRPLK	N2H9F0S0	9-2-0-0-0	-1	0	4	1	1	1	1	16	b2/b3/b4/b7/b12/	y1/y3/y4/y5/y6/y7/y8/y9/y10/y11/y15/	1864.63	1802.07	4559	4	3666.71	1	1	1
1	7753	SunS_13_OVCAR3_HILIC_IntactGlycopeptide_F1.7753.7753.3.0.dta	3479.48	3	32.87	GVHNASLALSASIGR	N2H10F0S0	10-2-0-0-0	-1	0	4	1	1	1	1	18	b3/b4/b5/b8/b9/	y1/y2/y3/y4/y5/y6/y7/y8/y9/y10/y11/y12/y13/	2026.69	1452.79	417	3	3479.48	1	1	1
1	7754	SunS_13_OVCAR3_HILIC_IntactGlycopeptide_F1.7754.7754.3.0.dta	3317.43	3	32.87	GVHNASLALSASIGR	N2H9F0S0	9-2-0-0-0	-1	0	4	1	1	1	1	19	b3/b4/b5/b6/b7/b8/	y1/y2/y3/y4/y5/y6/y7/y8/y9/y10/y11/y12/y13/	1864.63	1452.79	257	3	3317.43	1	1	1
1	7815	SunS_13_OVCAR3_HILIC_IntactGlycopeptide_F1.7815.7815.3.0.dta	3155.37	3	33.02	GVHNASLALSASIGR	N2H8F0S0	8-2-0-0-0	-1	0	4	1	1	1	1	12	b3/b5/b8/b10/	y2/y5/y6/y7/y8/y10/y11/y12/	1702.58	1452.79	827	3	3155.38	1	1	1
1	7842	SunS_13_OVCAR3_HILIC_IntactGlycopeptide_F1.7842.7842.3.0.dta	3180.54	3	33.08	IAPASNVSHTVVLRPLK	N2H6F0S0	6-2-0-0-0	-1	0	3	0	1	1	1	9	b2/	y1/y3/y4/y6/y7/y8/y9/y10/	1378.48	1802.06	3246	3	3180.54	1	1	1
1	7996	SunS_13_OVCAR3_HILIC_IntactGlycopeptide_F1.7996.7996.3.0.dta	3155.27	3	33.45	ANFTEIQK	N4H5F0S2	5-4-2-0-0	-1	0	2	1	0	1	0	8	b5/b6/b7/	y2/y3/y5/y6/y7/	2204.77	950.496	#N/A	3	3155.26	1	0	0
1	8070	SunS_13_OVCAR3_HILIC_IntactGlycopeptide_F1.8070.8070.3.0.dta	3520.4	3	33.64	ANFTEIQK	N5H6F0S2	6-5-2-0-0	-1	0	2	1	0	1	0	7	b2/b5/b6/b7/	y1/y3/y4/	2569.9	950.497	#N/A	3	3520.4	1	0	0
1	8093	SunS_13_OVCAR3_HILIC_IntactGlycopeptide_F1.8093.8093.3.0.dta	3771.57	3	33.69	YKPDTLAVAVENGTGTDR	N2H9F0S0	9-2-0-0-0	-1	0	3	0	1	1	1	7	b1/b2/b8/b10/	y1/y4/y16/	1864.63	1906.94	3862	3	3771.58	1	1	1
1	8124	SunS_13_OVCAR3_HILIC_IntactGlycopeptide_F1.8124.8124.3.0.dta	3831.59	3	33.77	GLNLTEDTYKPR	N5H6F1S1	6-5-1-1-0	0	0	3	1	0	1	1	6		y1/y2/y3/y5/y6/y8/	2424.87	1406.73	2885	3	3831.59	1	1	1
1	8141	SunS_13_OVCAR3_HILIC_IntactGlycopeptide_F1.8141.8141.3.0.dta	3241.35	3	33.82	KQNNGAFNETLFR	N2H8F0S0	8-2-0-0-0	0	0	4	1	1	1	1	8	b1/b7/	y1/y2/y3/y4/y5/y9/	1702.58	1538.77	2009	3	3241.35	1	1	1
1	8217	SunS_13_OVCAR3_HILIC_IntactGlycopeptide_F1.8217.8217.3.0.dta	3208.37	3	34.01	ATVPVYINTTNANK	N2H8F0S0	8-2-0-0-0	-1	0	2	1	0	1	0	6	b2/b3/	y6/y7/y9/y11/	1702.58	1505.79	4563	3	3208.37	1	1	1
1	8285	SunS_13_OVCAR3_HILIC_IntactGlycopeptide_F1.8285.8285.3.0.dta	3155.27	3	34.17	ANFTEIQK	N4H5F0S2	5-4-2-0-0	-1	0	2	1	0	1	0	11	b3/b4/b5/b6/b7/	y1/y2/y3/y4/y5/y6/	2204.77	950.498	#N/A	3	3155.26	1	0	0
1	8309	SunS_13_OVCAR3_HILIC_IntactGlycopeptide_F1.8309.8309.3.0.dta	3466.46	3	34.23	GLNLTEDTYKPR	N4H5F1S1	5-4-1-1-0	-1	0	4	1	1	1	1	8	b3/	y1/y2/y3/y5/y6/y7/y8/	2059.73	1406.72	1793	3	3466.46	1	1	1
1	8345	SunS_13_OVCAR3_HILIC_IntactGlycopeptide_F1.8345.8345.3.0.dta	2990.36	3	34.32	ANTTQPGIVEGGQVLK	N2H6F0S0	6-2-0-0-0	-1	0	4	1	1	1	1	19	b3/b4/b5/b8/b9/	y1/y2/y3/y4/y5/y6/y7/y8/y9/y10/y11/y12/y13/y14/	1378.48	1611.88	485	3	2990.35	1	1	1
1	8349	SunS_13_OVCAR3_HILIC_IntactGlycopeptide_F1.8349.8349.3.0.dta	3583.59	3	34.32	ANTTQPGIVEGGQVLK	N5H5F1S0	5-5-0-1-0	-1	0	2	1	0	1	0	11	b5/b7/	y5/y6/y7/y8/y10/y11/y12/y13/y14/	1971.72	1611.87	794	3	3583.59	1	1	1
1	8385	SunS_13_OVCAR3_HILIC_IntactGlycopeptide_F1.8385.8385.3.0.dta	3177.44	3	34.41	ANTTQPGIVEGGQVLK	N3H5F1S0	5-3-0-1-0	0	0	4	1	1	1	1	20	b3/b4/b5/b8/b9/b14/	y1/y2/y3/y4/y5/y6/y7/y8/y9/y10/y11/y12/y13/y14/	1565.56	1611.88	669	3	3177.43	1	1	1
1	8390	SunS_13_OVCAR3_HILIC_IntactGlycopeptide_F1.8390.8390.4.0.dta	3177.43	4	34.43	ANTTQPGIVEGGQVLK	N3H5F1S0	5-3-0-1-0	-1	0	2	1	0	1	0	8	b3/b5/	y2/y6/y7/y8/y11/y12/	1565.56	1611.87	1908	4	3177.43	1	1	1
1	8392	SunS_13_OVCAR3_HILIC_IntactGlycopeptide_F1.8392.8392.3.0.dta	2828.29	3	34.43	ANTTQPGIVEGGQVLK	N2H5F0S0	5-2-0-0-0	0	0	3	1	0	1	1	20	b3/b4/b5/b7/b8/b9/	y1/y2/y3/y4/y5/y6/y7/y8/y9/y10/y11/y12/y13/y14/	1216.42	1611.87	451	3	2828.3	1	1	1
1	8393	SunS_13_OVCAR3_HILIC_IntactGlycopeptide_F1.8393.8393.3.0.dta	3421.54	3	34.43	ANTTQPGIVEGGQVLK	N5H4F1S0	4-5-0-1-0	-2	0	3	1	1	1	0	14	b3/b4/b5/b8/	y1/y2/y6/y7/y8/y10/y11/y12/y13/y14/	1809.67	1611.88	1159	3	3421.54	1	1	1
1	8403	SunS_13_OVCAR3_HILIC_IntactGlycopeptide_F1.8403.8403.4.0.dta	3421.53	4	34.46	ANTTQPGIVEGGQVLK	N5H4F1S0	4-5-0-1-0	-2	0	2	1	0	1	0	7	b2/b5/	y2/y6/y7/y8/y11/	1809.67	1611.86	3669	4	3421.54	1	1	1
1	8473	SunS_13_OVCAR3_HILIC_IntactGlycopeptide_F1.8473.8473.3.0.dta	3015.38	3	34.63	ANTTQPGIVEGGQVLK	N3H4F1S0	4-3-0-1-0	-2	0	2	1	0	1	0	9	b3/	y6/y7/y8/y10/y11/y12/y13/y14/	1403.51	1611.87	1599	3	3015.38	1	1	1
1	8498	SunS_13_OVCAR3_HILIC_IntactGlycopeptide_F1.8498.8498.3.0.dta	3177.43	3	34.69	ANTTQPGIVEGGQVLK	N3H5F1S0	5-3-0-1-0	-1	0	2	1	0	1	0	12	b3/b4/b5/	y1/y5/y6/y7/y8/y10/y11/y12/y13/	1565.56	1611.87	871	3	3177.43	1	1	1
1	8649	SunS_13_OVCAR3_HILIC_IntactGlycopeptide_F1.8649.8649.3.0.dta	3248.45	3	35.05	KNLTLMATTSQLPK	N2H8F0S0	8-2-0-0-0	-1	0	4	1	1	1	1	11	b1/b12/	y1/y2/y3/y7/y8/y9/y10/y11/y12/	1702.58	1545.86	#N/A	3	3248.45	1	0	0
1	8665	SunS_13_OVCAR3_HILIC_IntactGlycopeptide_F1.8665.8665.3.0.dta	3664.56	3	35.09	ANTSALAVPSPVSNSASAR	N2H9F0S0	9-2-0-0-0	-1	0	2	1	0	1	0	14	b3/b6/b7/b8/	y1/y7/y9/y10/y11/y12/y13/y14/y15/y16/	1864.63	1799.93	633	3	3664.56	1	1	1
1	8697	SunS_13_OVCAR3_HILIC_IntactGlycopeptide_F1.8697.8697.3.0.dta	3040.26	3	35.17	DSLSINATNIK	N2H9F0S0	9-2-0-0-0	-1	0	2	1	0	1	0	11	b3/b4/b6/b7/b8/b10/	y1/y2/y3/y4/y5/	1864.63	1175.62	1360	3	3040.26	1	1	1
1	8700	SunS_13_OVCAR3_HILIC_IntactGlycopeptide_F1.8700.8700.3.0.dta	3502.5	3	35.18	ANTSALAVPSPVSNSASAR	N2H8F0S0	8-2-0-0-0	-1	0	2	1	0	1	0	15	b3/b6/b7/b8/	y1/y3/y6/y7/y9/y10/y11/y12/y13/y14/y15/	1702.58	1799.92	603	3	3502.51	1	1	1
1	8740	SunS_13_OVCAR3_HILIC_IntactGlycopeptide_F1.8740.8740.3.0.dta	2878.21	3	35.27	DSLSINATNIK	N2H8F0S0	8-2-0-0-0	-1	0	3	1	0	1	1	19	b2/b3/b4/b5/b6/b7/b8/b9/b10/	y1/y2/y3/y4/y5/y6/y7/y8/y9/y10/	1702.58	1175.63	1662	3	2878.21	1	1	1
1	8762	SunS_13_OVCAR3_HILIC_IntactGlycopeptide_F1.8762.8762.3.0.dta	2716.16	3	35.32	DSLSINATNIK	N2H7F0S0	7-2-0-0-0	0	0	2	1	0	1	0	15	b2/b3/b4/b6/b7/b10/	y1/y2/y3/y4/y5/y6/y7/y8/y10/	1540.53	1175.63	985	3	2716.16	1	1	1
1	8763	SunS_13_OVCAR3_HILIC_IntactGlycopeptide_F1.8763.8763.4.0.dta	4825.93	4	35.33	DCVECLLLHSGKPDNQTCHSLCR	N2H10F0S0	10-2-0-0-0	-3	0	2	0	1	0	1	18	b2/b3/b4/b5/b6/b7/b8/b9/b11/b12/b14/	y1/y2/y3/y4/y5/y6/y7/	2026.69	2799.24	#N/A	2	2413.97	0	1	0
1	8781	SunS_13_OVCAR3_HILIC_IntactGlycopeptide_F1.8781.8781.5.0.dta	4663.87	5	35.37	DCVECLLLHSGKPDNQTCHSLCR	N2H9F0S0	9-2-0-0-0	0	0	2	0	1	0	1	18	b2/b3/b4/b5/b6/b7/b8/b9/b10/b12/b14/	y1/y2/y3/y4/y5/y6/y7/	1864.63	2799.24	13106	5	4663.89	1	0	0
1	8782	SunS_13_OVCAR3_HILIC_IntactGlycopeptide_F1.8782.8782.4.0.dta	4663.88	4	35.37	DCVECLLLHSGKPDNQTCHSLCR	N2H9F0S0	9-2-0-0-0	-2	0	2	0	1	0	1	21	b2/b3/b4/b5/b6/b7/b8/b9/b10/b12/b14/	y1/y2/y3/y4/y5/y6/y7/y8/y9/y11/	1864.63	2799.24	#N/A	4	4663.88	1	0	0
1	8783	SunS_13_OVCAR3_HILIC_IntactGlycopeptide_F1.8783.8783.3.0.dta	3772.48	3	35.38	DCVLQCEEQNCSGGALNHFR	N2H6F0S0	6-2-0-0-0	0	0	3	0	1	1	1	15	b2/b3/b4/b5/b9/	y1/y2/y3/y4/y5/y6/y7/y8/y9/y10/	1378.48	2394.01	#N/A	3	3772.48	1	0	0
1	8786	SunS_13_OVCAR3_HILIC_IntactGlycopeptide_F1.8786.8786.3.0.dta	2498.1	3	35.38	TYNASVLPVR	N2H6F0S0	6-2-0-0-0	-1	0	3	1	0	1	1	8	b2/	y1/y3/y4/y5/y6/y7/y8/	1378.48	1119.62	315	3	2498.09	1	1	1
1	8789	SunS_13_OVCAR3_HILIC_IntactGlycopeptide_F1.8789.8789.4.0.dta	3772.48	4	35.39	DCVLQCEEQNCSGGALNHFR	N2H6F0S0	6-2-0-0-0	0	0	2	0	1	0	1	11	b2/b3/b4/	y1/y2/y3/y4/y5/y8/y9/y10/	1378.48	2394	6946	4	3772.48	1	0	0
1	8805	SunS_13_OVCAR3_HILIC_IntactGlycopeptide_F1.8805.8805.4.0.dta	4501.83	4	35.43	DCVECLLLHSGKPDNQTCHSLCR	N2H8F0S0	8-2-0-0-0	-2	0	2	0	1	0	1	22	b2/b3/b4/b5/b6/b7/b8/b9/b10/b11/b12/b14/	y1/y2/y3/y4/y5/y6/y7/y8/y9/y11/	1702.58	2799.25	#N/A	4	4501.83	1	0	0
1	8806	SunS_13_OVCAR3_HILIC_IntactGlycopeptide_F1.8806.8806.5.0.dta	4501.81	5	35.43	DCVECLLLHSGKPDNQTCHSLCR	N2H8F0S0	8-2-0-0-0	-1	0	2	0	1	0	1	18	b2/b3/b4/b6/b7/b8/b9/b12/b14/	y1/y2/y4/y5/y6/y7/y8/y9/y11/	1702.58	2799.23	13611	5	4501.83	1	0	0
1	8848	SunS_13_OVCAR3_HILIC_IntactGlycopeptide_F1.8848.8848.3.0.dta	2878.22	3	35.54	DSLSINATNIK	N2H8F0S0	8-2-0-0-0	0	0	3	1	0	1	1	18	b2/b3/b4/b5/b7/b8/b9/b10/	y1/y2/y3/y4/y5/y6/y7/y8/y9/y10/	1702.58	1175.64	1669	3	2878.21	1	1	1
1	8851	SunS_13_OVCAR3_HILIC_IntactGlycopeptide_F1.8851.8851.3.0.dta	2336.04	3	35.54	TYNASVLPVR	N2H5F0S0	5-2-0-0-0	0	0	2	1	0	1	0	9	b2/b4/	y1/y3/y4/y5/y6/y7/y8/	1216.42	1119.62	180	3	2336.04	1	1	1
1	8858	SunS_13_OVCAR3_HILIC_IntactGlycopeptide_F1.8858.8858.3.0.dta	3291.55	3	35.56	NLEKNSTKQEILAALEK	N2H5F1S0	5-2-0-1-0	-1	0	4	1	1	1	1	17	b2/b3/b5/b6/b7/b13/b15/	y1/y2/y3/y4/y5/y6/y7/y8/y9/y11/	1362.48	1929.06	1450	3	3291.55	1	1	1
1	8863	SunS_13_OVCAR3_HILIC_IntactGlycopeptide_F1.8863.8863.4.0.dta	3291.55	4	35.57	NLEKNSTKQEILAALEK	N2H5F1S0	5-2-0-1-0	0	0	3	1	1	0	1	6	b2/	y3/y4/y5/y6/y9/	1362.48	1929.07	#N/A	4	3291.55	1	1	1
1	8868	SunS_13_OVCAR3_HILIC_IntactGlycopeptide_F1.8868.8868.3.0.dta	2716.16	3	35.58	DSLSINATNIK	N2H7F0S0	7-2-0-0-0	-1	0	2	1	0	1	0	11	b3/b4/b7/b10/	y1/y2/y3/y4/y5/y6/y8/	1540.53	1175.63	849	3	2716.16	1	1	1
1	8904	SunS_13_OVCAR3_HILIC_IntactGlycopeptide_F1.8904.8904.3.0.dta	3145.5	3	35.68	NLEKNSTKQEILAALEK	N2H5F0S0	5-2-0-0-0	-1	0	2	0	1	0	1	6	b2/b8/	y2/y3/y4/y5/	1216.42	1929.08	4754	3	3145.49	1	1	1
1	8917	SunS_13_OVCAR3_HILIC_IntactGlycopeptide_F1.8917.8917.3.0.dta	3129.49	3	35.72	NLEKNSTKQEILAALEK	N2H4F1S0	4-2-0-1-0	-1	0	4	1	1	1	1	14	b2/b3/b5/b8/b14/	y1/y2/y3/y4/y5/y6/y7/y9/y12/	1200.43	1929.06	3158	3	3129.49	1	1	1
1	8951	SunS_13_OVCAR3_HILIC_IntactGlycopeptide_F1.8951.8951.3.0.dta	2983.45	3	35.81	NLEKNSTKQEILAALEK	N2H4F0S0	4-2-0-0-0	-1	0	2	0	1	0	1	6	b2/b3/	y2/y3/y4/y5/	1054.37	1929.08	3834	3	2983.43	1	1	1
1	8981	SunS_13_OVCAR3_HILIC_IntactGlycopeptide_F1.8981.8981.4.0.dta	4386.76	4	35.88	MDKSDAVSHTGNYTCEVTELTR	N3H6F0S1	6-3-1-0-0	-2	0	2	0	1	0	1	11		y1/y2/y3/y4/y5/y6/y7/y8/y9/y10/y15/	1872.65	2514.11	5045	4	4386.77	1	0	0
1	9121	SunS_13_OVCAR3_HILIC_IntactGlycopeptide_F1.9121.9121.3.0.dta	2935.25	3	36.23	NHSIFLADINQER	N2H6F0S0	6-2-0-0-0	0	0	4	1	1	1	1	19	b2/b3/b4/b5/b6/b7/b8/	y1/y2/y3/y4/y5/y6/y7/y8/y9/y10/y11/y12/	1378.48	1556.78	37	3	2935.26	1	1	1
1	9154	SunS_13_OVCAR3_HILIC_IntactGlycopeptide_F1.9154.9154.3.0.dta	3011.21	3	36.32	TCDWLPKPNMSASCK	N2H5F0S0	5-2-0-0-0	-1	0	4	1	1	1	1	11	b2/b3/b4/b5/	y1/y2/y3/y5/y6/y8/y10/	1216.42	1794.79	4553	3	3011.21	1	0	0
1	9187	SunS_13_OVCAR3_HILIC_IntactGlycopeptide_F1.9187.9187.3.0.dta	2919.25	3	36.4	NHSIFLADINQER	N2H5F1S0	5-2-0-1-0	0	0	4	1	1	1	1	15	b2/b3/b4/b5/b6/	y1/y4/y5/y6/y7/y8/y9/y10/y11/y12/	1362.48	1556.77	308	3	2919.26	1	1	1
1	9205	SunS_13_OVCAR3_HILIC_IntactGlycopeptide_F1.9205.9205.3.0.dta	2773.21	3	36.44	NHSIFLADINQER	N2H5F0S0	5-2-0-0-0	-1	0	4	1	1	1	1	19	b2/b3/b4/b5/b6/b7/b8/	y1/y2/y3/y4/y5/y6/y7/y8/y9/y10/y11/y12/	1216.42	1556.79	162	3	2773.2	1	1	1
1	9219	SunS_13_OVCAR3_HILIC_IntactGlycopeptide_F1.9219.9219.3.0.dta	2833.16	3	36.47	TCDWLPKPNMSASCK	N2H3F1S0	3-2-0-1-0	0	0	4	1	1	1	1	23	b2/b3/b4/b5/b6/b7/b8/b9/b10/b12/	y1/y2/y3/y4/y5/y6/y8/y9/y10/y11/y12/y13/y14/	1038.38	1794.79	#N/A	3	2833.18	1	0	0
1	9225	SunS_13_OVCAR3_HILIC_IntactGlycopeptide_F1.9225.9225.3.0.dta	2849.15	3	36.49	TCDWLPKPNMSASCK	N2H4F0S0	4-2-0-0-0	-1	0	3	0	1	1	1	9	b2/b3/b4/b5/	y2/y3/y5/y8/y10/	1054.37	1794.78	5293	3	2849.16	1	0	0
1	9226	SunS_13_OVCAR3_HILIC_IntactGlycopeptide_F1.9226.9226.3.0.dta	2960.3	3	36.49	NHSIFLADINQER	N3H4F1S0	4-3-0-1-0	0	0	4	1	1	1	1	11	b2/	y1/y4/y5/y6/y7/y8/y9/y10/y11/y12/	1403.51	1556.79	664	3	2960.29	1	1	1
1	9304	SunS_13_OVCAR3_HILIC_IntactGlycopeptide_F1.9304.9304.3.0.dta	2687.11	3	36.68	TCDWLPKPNMSASCK	N2H3F0S0	3-2-0-0-0	0	0	2	0	1	0	1	10	b2/b3/b4/b5/	y1/y2/y3/y5/y8/y10/	892.317	1794.8	#N/A	3	2687.11	1	0	0
1	9344	SunS_13_OVCAR3_HILIC_IntactGlycopeptide_F1.9344.9344.3.0.dta	2833.16	3	36.78	TCDWLPKPNMSASCK	N2H3F1S0	3-2-0-1-0	0	0	4	1	1	1	1	19	b2/b3/b4/b5/b6/b8/b12/	y1/y2/y3/y4/y5/y6/y8/y9/y10/y11/y12/y13/	1038.38	1794.79	#N/A	3	2833.18	1	0	0
1	9364	SunS_13_OVCAR3_HILIC_IntactGlycopeptide_F1.9364.9364.3.0.dta	2595.16	3	36.83	NHSIFLADINQER	N2H3F1S0	3-2-0-1-0	0	0	4	1	1	1	1	19	b2/b3/b4/b5/b6/b7/b8/	y1/y2/y3/y4/y5/y6/y7/y8/y9/y10/y11/y12/	1038.38	1556.78	122	3	2595.16	1	1	1
1	9396	SunS_13_OVCAR3_HILIC_IntactGlycopeptide_F1.9396.9396.4.0.dta	4573.86	4	36.91	MDKSDAVSHTGNYTCEVTELTR	N4H5F1S1	5-4-1-1-0	-2	0	2	0	1	0	1	12	b5/b7/b8/b9/b10/	y1/y3/y5/y7/y8/y9/y13/	2059.73	2514.13	#N/A	4	4573.85	1	0	0
1	9425	SunS_13_OVCAR3_HILIC_IntactGlycopeptide_F1.9425.9425.5.0.dta	5348.16	5	36.98	DGSDEPGTAACPNGSFHCTNTGYKPLYIPSNR	N2H9F0S0	9-2-0-0-0	-3	0	1	0	0	0	1	13	b2/b3/b4/b5/b8/b9/b10/b11/	y1/y4/y5/y6/y8/	1864.63	3483.53	#N/A	5	5348.17	1	0	0
1	9429	SunS_13_OVCAR3_HILIC_IntactGlycopeptide_F1.9429.9429.4.0.dta	5186.1	4	36.99	DGSDEPGTAACPNGSFHCTNTGYKPLYIPSNR	N2H8F0S0	8-2-0-0-0	-3	0	2	0	1	0	1	24	b2/b3/b4/b5/b6/b7/b8/b9/b10/b11/b13/	y1/y3/y4/y5/y6/y7/y8/y9/y10/y11/y12/y15/y16/	1702.58	3483.52	#N/A	4	5186.12	1	0	0
1	9431	SunS_13_OVCAR3_HILIC_IntactGlycopeptide_F1.9431.9431.5.0.dta	5186.12	5	37	DGSDEPGTAACPNGSFHCTNTGYKPLYIPSNR	N2H8F0S0	8-2-0-0-0	-2	0	1	0	0	0	1	17	b2/b3/b4/b5/b6/b7/b8/b9/b10/b11/	y1/y4/y5/y6/y8/y9/y11/	1702.58	3483.54	#N/A	5	5187.12	0	1	0
1	9446	SunS_13_OVCAR3_HILIC_IntactGlycopeptide_F1.9446.9446.3.0.dta	2833.16	3	37.04	TCDWLPKPNMSASCK	N2H3F1S0	3-2-0-1-0	-2	0	4	1	1	1	1	11	b2/b3/b4/b5/	y2/y3/y4/y5/y8/y10/y11/	1038.38	1794.78	#N/A	3	2833.17	1	0	0
1	9457	SunS_13_OVCAR3_HILIC_IntactGlycopeptide_F1.9457.9457.4.0.dta	5024.07	4	37.07	DGSDEPGTAACPNGSFHCTNTGYKPLYIPSNR	N2H7F0S0	7-2-0-0-0	-3	0	2	0	1	0	1	13	b2/b3/b4/b5/b8/b9/b10/	y1/y4/y5/y6/y8/y9/	1540.53	3483.54	11201	4	5024.06	1	0	0
1	9465	SunS_13_OVCAR3_HILIC_IntactGlycopeptide_F1.9465.9465.3.0.dta	2595.17	3	37.09	NHSIFLADINQER	N2H3F1S0	3-2-0-1-0	0	0	2	1	1	0	0	8	b2/	y5/y6/y7/y8/y9/y10/y11/	1038.38	1556.79	695	3	2595.16	1	1	1
1	9468	SunS_13_OVCAR3_HILIC_IntactGlycopeptide_F1.9468.9468.4.0.dta	4370.76	4	37.1	MDKSDAVSHTGNYTCEVTELTR	N3H5F1S1	5-3-1-1-0	-2	0	2	0	1	0	1	21	b5/b6/b7/b8/b9/b10/b11/b12/	y1/y2/y3/y4/y5/y6/y7/y8/y9/y10/y12/y13/y15/	1856.66	2514.11	8334	4	4370.78	1	0	0
1	9495	SunS_13_OVCAR3_HILIC_IntactGlycopeptide_F1.9495.9495.4.0.dta	4862.01	4	37.17	DGSDEPGTAACPNGSFHCTNTGYKPLYIPSNR	N2H6F0S0	6-2-0-0-0	-2	0	2	0	1	0	1	20	b2/b3/b4/b5/b8/b9/b10/b11/	y1/y3/y4/y5/y6/y7/y8/y9/y10/y11/y14/y15/	1378.48	3483.54	13253	4	4862.01	1	0	0
1	9564	SunS_13_OVCAR3_HILIC_IntactGlycopeptide_F1.9564.9564.3.0.dta	3817.5	3	37.35	FSDSLDSNSSTQFEVK	N2H10F0S0	10-2-0-0-0	-1	0	4	1	1	1	1	17	b2/b3/b4/b5/b6/b9/	y1/y2/y3/y4/y5/y6/y7/y8/y9/y10/y11/	2026.69	1790.81	1161	3	3817.5	1	1	1
1	9596	SunS_13_OVCAR3_HILIC_IntactGlycopeptide_F1.9596.9596.3.0.dta	3655.45	3	37.44	FSDSLDSNSSTQFEVK	N2H9F0S0	9-2-0-0-0	-1	0	4	1	1	1	1	22	b2/b3/b4/b5/b6/b7/b8/b9/b15/	y1/y2/y3/y4/y5/y6/y7/y8/y9/y10/y11/y12/y13/	1864.63	1790.82	322	3	3655.45	1	1	1
1	9610	SunS_13_OVCAR3_HILIC_IntactGlycopeptide_F1.9610.9610.3.0.dta	3672.47	3	37.47	FSDGLESNSSTQFEVK	N4H4F1S1	4-4-1-1-0	-1	0	2	1	1	0	0	13	b2/b3/b9/	y1/y2/y3/y4/y5/y6/y7/y8/y9/y10/	1897.68	1774.79	#N/A	3	3672.47	1	0	0
1	9613	SunS_13_OVCAR3_HILIC_IntactGlycopeptide_F1.9613.9613.3.0.dta	3243.33	3	37.48	NALWHTGNTSGQVR	N2H8F0S0	8-2-0-0-0	0	0	4	1	1	1	1	7	b7/b8/b9/b12/	y1/y10/y12/	1702.58	1540.75	971	3	3243.33	1	1	1
1	9708	SunS_13_OVCAR3_HILIC_IntactGlycopeptide_F1.9708.9708.3.0.dta	3655.43	3	37.72	FSDSLDSNSSTQFEVK	N2H9F0S0	9-2-0-0-0	0	0	4	1	1	1	1	13	b3/b4/b6/	y1/y2/y3/y4/y5/y6/y7/y8/y10/y11/	1864.63	1790.79	1442	3	3655.44	1	1	1
1	9750	SunS_13_OVCAR3_HILIC_IntactGlycopeptide_F1.9750.9750.4.0.dta	5549.21	4	37.83	FVEQNETAINITTYPDQENNK	N6H7F1S2	7-6-2-1-0	-2	0	2	0	1	0	1	15	b2/b4/b6/b8/b9/	y3/y4/y5/y6/y7/y8/y9/y10/y11/y12/	3081.09	2468.11	#N/A	4	5549.2	1	1	1
1	9998	SunS_13_OVCAR3_HILIC_IntactGlycopeptide_F1.9998.9998.3.0.dta	3631.35	3	38.53	DTCTQECSYFNITK	N2H9F0S0	9-2-0-0-0	-1	0	4	1	1	1	1	18	b2/b3/b4/b5/b6/b7/b8/b9/b12/	y1/y2/y3/y4/y5/y7/y8/y9/y12/	1864.63	1766.72	3007	3	3631.36	1	1	1
1	10006	SunS_13_OVCAR3_HILIC_IntactGlycopeptide_F1.10006.10006.4.0.dta	4816	4	38.56	SSCGKENTSDPSLVIAFGR	N6H7F3S0	7-6-0-3-0	-2	0	4	1	1	1	1	6		y2/y3/y4/y5/y6/y9/	2791.02	2024.98	2145	4	4815.98	1	1	1
1	10033	SunS_13_OVCAR3_HILIC_IntactGlycopeptide_F1.10033.10033.5.0.dta	4873	5	38.62	SSCGKENTSDPSLVIAFGR	N7H7F2S0	7-7-0-2-0	-2	0	2	0	1	0	1	6		y2/y3/y4/y5/y6/y9/	2848.04	2024.96	3738	5	4873	1	1	1
1	10038	SunS_13_OVCAR3_HILIC_IntactGlycopeptide_F1.10038.10038.4.0.dta	4669.91	4	38.64	SSCGKENTSDPSLVIAFGR	N6H7F2S0	7-6-0-2-0	-2	0	4	1	1	1	1	11	b6/b7/b10/	y1/y2/y3/y4/y5/y6/y9/y11/	2644.96	2024.94	#N/A	2	2335.46	0	1	0
1	10042	SunS_13_OVCAR3_HILIC_IntactGlycopeptide_F1.10042.10042.3.0.dta	4872.98	3	38.65	SSCGKENTSDPSLVIAFGR	N7H7F2S0	7-7-0-2-0	-2	0	3	0	1	1	1	6	b6/	y2/y3/y4/y5/y9/	2848.04	2024.94	11022	3	4874	0	1	0
1	10085	SunS_13_OVCAR3_HILIC_IntactGlycopeptide_F1.10085.10085.3.0.dta	3469.32	3	38.75	DTCTQECSYFNITK	N2H8F0S0	8-2-0-0-0	-1	0	3	1	1	1	0	22	b2/b3/b4/b5/b6/b7/b8/b9/b10/b12/	y1/y2/y3/y4/y5/y6/y7/y8/y9/y10/y11/y12/	1702.58	1766.73	1883	3	3469.31	1	1	1
1	10105	SunS_13_OVCAR3_HILIC_IntactGlycopeptide_F1.10105.10105.3.0.dta	3631.37	3	38.8	DTCTQECSYFNITK	N2H9F0S0	9-2-0-0-0	-1	0	4	1	1	1	1	20	b2/b3/b4/b5/b6/b7/b8/b10/b12/	y1/y2/y3/y4/y5/y6/y7/y8/y9/y10/y11/	1864.63	1766.74	1807	3	3631.36	1	1	1
1	10127	SunS_13_OVCAR3_HILIC_IntactGlycopeptide_F1.10127.10127.4.0.dta	4873.02	4	38.85	SSCGKENTSDPSLVIAFGR	N7H7F2S0	7-7-0-2-0	-2	0	4	1	1	1	1	6		y2/y3/y4/y5/y6/y9/	2848.04	2024.98	5741	4	4873.01	1	1	1
1	10142	SunS_13_OVCAR3_HILIC_IntactGlycopeptide_F1.10142.10142.4.0.dta	4564.87	4	38.88	SSCGKENTSDPSLVIAFGR	N7H6F1S0	6-7-0-1-0	-3	0	3	0	1	1	1	11	b10/	y1/y2/y3/y4/y5/y6/y9/y10/y11/y12/	2539.93	2024.94	#N/A	2	2283.45	0	1	0
1	10222	SunS_13_OVCAR3_HILIC_IntactGlycopeptide_F1.10222.10222.4.0.dta	4652.94	4	39.08	SSCGKENTSDPSLVIAFGR	N6H6F1S1	6-6-1-1-0	-3	0	4	1	1	1	1	13	b6/b7/b10/	y1/y2/y3/y4/y5/y6/y9/y10/y11/y12/	2627.95	2025	2424	4	4653.94	0	1	0
1	10231	SunS_13_OVCAR3_HILIC_IntactGlycopeptide_F1.10231.10231.3.0.dta	3145.2	3	39.11	DTCTQECSYFNITK	N2H6F0S0	6-2-0-0-0	0	0	2	1	0	1	0	20	b2/b3/b4/b5/b6/b7/b9/b10/b12/	y1/y2/y3/y4/y5/y6/y7/y8/y9/y10/y11/	1378.48	1766.73	#N/A	3	3144.25	0	1	0
1	10238	SunS_13_OVCAR3_HILIC_IntactGlycopeptide_F1.10238.10238.3.0.dta	4361.82	3	39.12	SSCGKENTSDPSLVIAFGR	N6H6F1S0	6-6-0-1-0	-3	0	2	0	1	0	1	6	b6/	y3/y4/y5/y6/y9/	2336.85	2024.97	4320	3	4361.84	1	1	1
1	10285	SunS_13_OVCAR3_HILIC_IntactGlycopeptide_F1.10285.10285.4.0.dta	4507.86	4	39.24	SSCGKENTSDPSLVIAFGR	N6H6F2S0	6-6-0-2-0	0	0	3	0	1	1	1	6		y2/y3/y4/y5/y6/y9/	2482.91	2024.95	3866	4	4507.88	1	1	1
1	10405	SunS_13_OVCAR3_HILIC_IntactGlycopeptide_F1.10405.10405.3.0.dta	3381.51	3	39.54	NYAIIKPIGFNETAK	N2H8F0S0	8-2-0-0-0	0	0	4	1	1	1	1	8	b2/b3/b4/b5/	y1/y3/y7/y9/	1702.58	1678.93	1670	3	3381.5	1	1	1
1	10457	SunS_13_OVCAR3_HILIC_IntactGlycopeptide_F1.10457.10457.5.0.dta	5043.27	5	39.71	NDATEILYSHVVKPVPAHPSSNSTLNQAR	N4H4F1S1	4-4-1-1-0	-3	0	1	0	0	0	1	7	b2/b3/b4/b5/b6/b12/	y16/	1897.68	3145.58	#N/A	5	5044.29	0	1	0
1	10474	SunS_13_OVCAR3_HILIC_IntactGlycopeptide_F1.10474.10474.3.0.dta	3997.63	3	39.76	LQGLENWGQDPGVSANASK	N2H10F0S0	10-2-0-0-0	-2	0	3	0	1	1	1	18	b2/b3/b4/b5/b6/b7/b8/b9/b10/b13/	y1/y2/y3/y6/y9/y10/y12/y13/	2026.69	1970.94	1582	3	3997.64	1	1	1
1	10477	SunS_13_OVCAR3_HILIC_IntactGlycopeptide_F1.10477.10477.4.0.dta	3997.64	4	39.77	LQGLENWGQDPGVSANASK	N2H10F0S0	10-2-0-0-0	-1	0	2	0	1	0	1	6	b3/b7/b10/	y2/y6/y9/	2026.69	1970.95	3565	4	3997.65	1	1	1
1	10484	SunS_13_OVCAR3_HILIC_IntactGlycopeptide_F1.10484.10484.3.0.dta	3835.59	3	39.79	LQGLENWGQDPGVSANASK	N2H9F0S0	9-2-0-0-0	-1	0	4	1	1	1	1	27	b2/b3/b4/b5/b6/b7/b8/b9/b10/b11/b13/b17/	y1/y2/y3/y4/y5/y6/y8/y9/y10/y11/y12/y13/y14/y15/y17/	1864.63	1970.96	1618	3	3835.59	1	1	1
1	10487	SunS_13_OVCAR3_HILIC_IntactGlycopeptide_F1.10487.10487.4.0.dta	3835.59	4	39.8	LQGLENWGQDPGVSANASK	N2H9F0S0	9-2-0-0-0	0	0	4	1	1	1	1	21	b2/b3/b4/b5/b6/b7/b8/b9/b10/b12/b13/	y1/y2/y3/y4/y5/y6/y9/y10/y12/y13/	1864.63	1970.95	1236	4	3835.6	1	1	1
1	10504	SunS_13_OVCAR3_HILIC_IntactGlycopeptide_F1.10504.10504.4.0.dta	4880.12	4	39.85	SKPVLTGTHPVNTTVDFGGTTSFQCK	N5H4F1S1	4-5-1-1-0	-2	0	2	0	1	0	1	6	b9/	y5/y8/y9/y10/y11/	2100.76	2779.36	13399	4	4880.14	1	0	0
1	10529	SunS_13_OVCAR3_HILIC_IntactGlycopeptide_F1.10529.10529.4.0.dta	3673.54	4	39.92	LQGLENWGQDPGVSANASK	N2H8F0S0	8-2-0-0-0	-1	0	3	0	1	1	1	11	b2/b3/b4/b5/b7/b10/	y2/y3/y9/y10/y12/	1702.58	1970.96	2098	4	3673.54	1	1	1
1	10537	SunS_13_OVCAR3_HILIC_IntactGlycopeptide_F1.10537.10537.3.0.dta	3673.53	3	39.95	LQGLENWGQDPGVSANASK	N2H8F0S0	8-2-0-0-0	-2	0	4	1	1	1	1	24	b2/b3/b4/b5/b6/b7/b8/b9/b10/b11/b13/b15/	y1/y2/y3/y4/y5/y6/y7/y9/y10/y12/y13/y14/	1702.58	1970.95	1722	3	3673.54	1	1	1
1	10586	SunS_13_OVCAR3_HILIC_IntactGlycopeptide_F1.10586.10586.3.0.dta	3511.49	3	40.08	LQGLENWGQDPGVSANASK	N2H7F0S0	7-2-0-0-0	-1	0	4	1	1	1	1	17	b2/b3/b4/b5/b6/b7/b9/b10/b13/	y1/y2/y3/y4/y6/y9/y10/y12/	1540.53	1970.96	2230	3	3511.48	1	1	1
1	10634	SunS_13_OVCAR3_HILIC_IntactGlycopeptide_F1.10634.10634.3.0.dta	2849.17	3	40.21	VINETWAWK	N2H8F0S0	8-2-0-0-0	-1	0	3	1	0	1	1	9	b2/b7/	y1/y2/y3/y4/y5/y6/y7/	1702.58	1146.59	729	3	2849.18	1	1	1
1	10658	SunS_13_OVCAR3_HILIC_IntactGlycopeptide_F1.10658.10658.3.0.dta	3349.44	3	40.28	LQGLENWGQDPGVSANASK	N2H6F0S0	6-2-0-0-0	0	0	4	1	1	1	1	19	b2/b3/b5/b6/b7/b9/b10/b13/	y1/y2/y3/y4/y5/y6/y9/y10/y12/y13/y14/	1378.48	1970.96	1096	3	3349.43	1	1	1
1	10678	SunS_13_OVCAR3_HILIC_IntactGlycopeptide_F1.10678.10678.4.0.dta	4413.79	4	40.34	HNNDTQHIWESDSNEFSVIADPR	N2H8F0S0	8-2-0-0-0	-2	0	1	0	0	0	1	11	b3/	y1/y2/y4/y5/y6/y7/y8/y11/y12/y15/	1702.58	2711.21	1149	4	4413.78	1	1	1
1	10681	SunS_13_OVCAR3_HILIC_IntactGlycopeptide_F1.10681.10681.3.0.dta	3126.31	3	40.35	AGPNGTLFVADAYK	N2H8F0S0	8-2-0-0-0	0	0	4	1	1	1	1	12	b7/b8/b9/	y2/y3/y4/y5/y6/y7/y8/y9/y10/	1702.58	1423.73	377	3	3126.3	1	1	1
1	10723	SunS_13_OVCAR3_HILIC_IntactGlycopeptide_F1.10723.10723.3.0.dta	2849.18	3	40.47	VINETWAWK	N2H8F0S0	8-2-0-0-0	-1	0	3	1	0	1	1	8	b2/b8/	y1/y2/y4/y5/y6/y7/	1702.58	1146.6	1912	3	2849.18	1	1	1
1	10750	SunS_13_OVCAR3_HILIC_IntactGlycopeptide_F1.10750.10750.3.0.dta	2964.25	3	40.55	AGPNGTLFVADAYK	N2H7F0S0	7-2-0-0-0	0	0	4	1	1	1	1	12	b8/b10/	y1/y2/y3/y4/y5/y6/y7/y8/y9/y10/	1540.53	1423.72	699	3	2964.25	1	1	1
1	10779	SunS_13_OVCAR3_HILIC_IntactGlycopeptide_F1.10779.10779.4.0.dta	4538.97	4	40.62	HIWSLEISNKPNVSEPEEPK	N4H5F2S1	5-4-1-2-0	-2	0	2	0	1	0	1	15	b2/b3/b4/b6/b7/b8/b9/b10/	y2/y3/y5/y6/y7/y8/y10/	2205.79	2333.17	#N/A	4	4538.98	1	0	0
1	10782	SunS_13_OVCAR3_HILIC_IntactGlycopeptide_F1.10782.10782.3.0.dta	2802.2	3	40.63	AGPNGTLFVADAYK	N2H6F0S0	6-2-0-0-0	0	0	4	1	1	1	1	24	b3/b4/b5/b6/b7/b8/b9/b10/b11/b12/b13/	y1/y2/y3/y4/y5/y6/y7/y8/y9/y10/y11/y12/y13/	1378.48	1423.72	209	3	2802.2	1	1	1
1	10825	SunS_13_OVCAR3_HILIC_IntactGlycopeptide_F1.10825.10825.4.0.dta	4392.92	4	40.74	HIWSLEISNKPNVSEPEEPK	N4H5F1S1	5-4-1-1-0	-3	0	2	0	1	0	1	9	b2/b3/b6/b7/b10/	y2/y5/y7/y10/	2059.73	2333.18	#N/A	2	2197.46	0	1	0
1	10843	SunS_13_OVCAR3_HILIC_IntactGlycopeptide_F1.10843.10843.3.0.dta	3071.32	3	40.78	AGPNGTLFVADAYK	N5H3F1S0	3-5-0-1-0	-1	0	4	1	1	1	1	7	b8/b10/	y3/y5/y6/y7/y10/	1647.61	1423.71	3069	3	3071.35	1	1	1
1	10864	SunS_13_OVCAR3_HILIC_IntactGlycopeptide_F1.10864.10864.3.0.dta	3186.31	3	40.84	DVNYTQIVVDR	N2H9F0S0	9-2-0-0-0	-1	0	3	1	0	1	1	18	b2/b3/b4/b5/b6/b7/b8/b9/	y1/y2/y3/y4/y5/y6/y7/y8/y9/y10/	1864.63	1321.68	218	3	3186.31	1	1	1
1	10869	SunS_13_OVCAR3_HILIC_IntactGlycopeptide_F1.10869.10869.3.0.dta	3024.25	3	40.85	DVNYTQIVVDR	N2H8F0S0	8-2-0-0-0	-1	0	2	1	0	1	0	12	b2/b3/b4/	y1/y2/y3/y4/y5/y6/y7/y8/y9/	1702.58	1321.67	194	3	3024.26	1	1	1
1	10877	SunS_13_OVCAR3_HILIC_IntactGlycopeptide_F1.10877.10877.3.0.dta	2868.27	3	40.87	AGPNGTLFVADAYK	N4H3F1S0	3-4-0-1-0	0	0	4	1	1	1	1	21	b3/b4/b6/b7/b8/b9/b10/b11/b12/b13/	y1/y2/y3/y4/y5/y6/y7/y8/y9/y10/y12/	1444.53	1423.73	143	3	2868.26	1	1	1
1	10886	SunS_13_OVCAR3_HILIC_IntactGlycopeptide_F1.10886.10886.3.0.dta	2802.19	3	40.89	AGPNGTLFVADAYK	N2H6F0S0	6-2-0-0-0	-1	0	4	1	1	1	1	11		y1/y2/y3/y4/y5/y6/y7/y8/y9/y10/y12/	1378.48	1423.72	567	3	2802.2	1	1	1
1	10948	SunS_13_OVCAR3_HILIC_IntactGlycopeptide_F1.10948.10948.3.0.dta	2640.14	3	41.04	AGPNGTLFVADAYK	N2H5F0S0	5-2-0-0-0	0	0	4	1	1	1	1	17	b3/b4/b7/b8/b10/	y1/y2/y3/y4/y5/y6/y7/y8/y9/y10/y11/y12/	1216.42	1423.72	215	3	2640.15	1	1	1
1	10974	SunS_13_OVCAR3_HILIC_IntactGlycopeptide_F1.10974.10974.4.0.dta	4123.75	4	41.1	TTLVDNNTWNNSHIALVGK	N2H10F0S0	10-2-0-0-0	-2	0	4	1	1	1	1	24	b2/b3/b4/b5/b6/b7/b8/b9/b17/	y1/y2/y3/y4/y5/y6/y7/y8/y9/y10/y11/y12/y13/y15/y17/	2026.69	2097.07	2705	4	4123.77	1	1	1
1	10999	SunS_13_OVCAR3_HILIC_IntactGlycopeptide_F1.10999.10999.4.0.dta	3961.72	4	41.16	TTLVDNNTWNNSHIALVGK	N2H9F0S0	9-2-0-0-0	-1	0	4	1	1	1	1	21	b2/b3/b4/b5/b6/b7/b8/b9/	y1/y2/y3/y4/y5/y6/y7/y8/y9/y10/y11/y15/y17/	1864.63	2097.09	3212	4	3961.72	1	1	1
1	11009	SunS_13_OVCAR3_HILIC_IntactGlycopeptide_F1.11009.11009.4.0.dta	4828.02	4	41.19	VPSENKDLYEYSWVQGPLHSNETDR	N2H9F0S0	9-2-0-0-0	-2	0	2	0	1	0	1	17	b2/b4/b5/b6/b7/b8/b9/b10/b11/b14/b15/	y1/y3/y4/y6/y10/y11/	1864.63	2963.38	6064	4	4828.02	1	1	1
1	11010	SunS_13_OVCAR3_HILIC_IntactGlycopeptide_F1.11010.11010.3.0.dta	4123.76	3	41.19	TTLVDNNTWNNSHIALVGK	N2H10F0S0	10-2-0-0-0	-2	0	4	1	1	1	1	32	b2/b3/b4/b5/b6/b7/b8/b9/b10/b11/b13/b14/b15/b16/b17/	y1/y2/y3/y4/y5/y6/y7/y8/y9/y10/y11/y12/y13/y14/y15/y16/y17/	2026.69	2097.07	1625	3	4123.76	1	1	1
1	11029	SunS_13_OVCAR3_HILIC_IntactGlycopeptide_F1.11029.11029.4.0.dta	4665.97	4	41.24	VPSENKDLYEYSWVQGPLHSNETDR	N2H8F0S0	8-2-0-0-0	-2	0	2	0	1	0	1	21	b2/b3/b4/b5/b6/b7/b8/b9/b10/b11/b12/b13/b14/b15/	y1/y2/y3/y4/y6/y10/y11/	1702.58	2963.39	6531	4	4665.96	1	1	1
1	11036	SunS_13_OVCAR3_HILIC_IntactGlycopeptide_F1.11036.11036.4.0.dta	3799.66	4	41.26	TTLVDNNTWNNSHIALVGK	N2H8F0S0	8-2-0-0-0	-2	0	2	0	1	0	1	6	b2/b3/	y1/y2/y3/y5/	1702.58	2097.08	5621	4	3799.66	1	1	1
1	11047	SunS_13_OVCAR3_HILIC_IntactGlycopeptide_F1.11047.11047.3.0.dta	3961.71	3	41.29	TTLVDNNTWNNSHIALVGK	N2H9F0S0	9-2-0-0-0	-2	0	4	1	1	1	1	32	b2/b3/b4/b5/b6/b7/b8/b9/b10/b11/b13/b14/b15/b16/b17/	y1/y2/y3/y4/y5/y6/y7/y8/y9/y10/y11/y12/y13/y14/y15/y16/y17/	1864.63	2097.08	2284	3	3961.71	1	1	1
1	11051	SunS_13_OVCAR3_HILIC_IntactGlycopeptide_F1.11051.11051.3.0.dta	3799.64	3	41.29	TTLVDNNTWNNSHIALVGK	N2H8F0S0	8-2-0-0-0	-1	0	4	1	1	1	1	24	b2/b3/b4/b5/b6/b7/b8/b9/b16/b17/	y1/y2/y3/y4/y5/y6/y7/y8/y9/y10/y11/y12/y15/y17/	1702.58	2097.06	2867	3	3799.66	1	1	1
1	11082	SunS_13_OVCAR3_HILIC_IntactGlycopeptide_F1.11082.11082.4.0.dta	4123.76	4	41.37	TTLVDNNTWNNSHIALVGK	N2H10F0S0	10-2-0-0-0	-2	0	4	1	1	1	1	12	b2/b3/b4/	y1/y2/y3/y4/y5/y6/y7/y8/y9/	2026.69	2097.07	5253	4	4123.76	1	1	1
1	11103	SunS_13_OVCAR3_HILIC_IntactGlycopeptide_F1.11103.11103.4.0.dta	3961.72	4	41.43	TTLVDNNTWNNSHIALVGK	N2H9F0S0	9-2-0-0-0	-2	0	4	1	1	1	1	22	b2/b3/b4/b5/b6/b7/b9/b17/	y1/y2/y3/y4/y5/y6/y7/y8/y9/y10/y11/y14/y15/y17/	1864.63	2097.09	2607	4	3961.72	1	1	1
1	11118	SunS_13_OVCAR3_HILIC_IntactGlycopeptide_F1.11118.11118.3.0.dta	4123.75	3	41.47	TTLVDNNTWNNSHIALVGK	N2H10F0S0	10-2-0-0-0	-2	0	3	0	1	1	1	11	b2/b3/	y1/y2/y3/y4/y5/y6/y8/y15/y17/	2026.69	2097.06	3517	3	4123.76	1	1	1
1	11144	SunS_13_OVCAR3_HILIC_IntactGlycopeptide_F1.11144.11144.3.0.dta	3961.7	3	41.54	TTLVDNNTWNNSHIALVGK	N2H9F0S0	9-2-0-0-0	-1	0	4	1	1	1	1	23	b2/b3/b4/b5/b6/b7/b8/b9/	y1/y2/y3/y4/y5/y6/y7/y8/y9/y10/y11/y12/y14/y15/y17/	1864.63	2097.07	2790	3	3961.71	1	1	1
1	11188	SunS_13_OVCAR3_HILIC_IntactGlycopeptide_F1.11188.11188.4.0.dta	3961.71	4	41.7	TTLVDNNTWNNSHIALVGK	N2H9F0S0	9-2-0-0-0	-2	0	2	0	1	0	1	9	b2/b3/b4/b8/	y2/y3/y4/y5/y7/	1864.63	2097.07	4118	4	3961.72	1	1	1
1	11221	SunS_13_OVCAR3_HILIC_IntactGlycopeptide_F1.11221.11221.3.0.dta	3512.44	3	41.79	GVVDSDDLPLNVSR	N2H10F0S0	10-2-0-0-0	0	0	2	1	0	1	0	7	b2/b3/b8/	y1/y2/y3/y6/	2026.69	1485.75	3990	3	3512.44	1	1	1
1	11271	SunS_13_OVCAR3_HILIC_IntactGlycopeptide_F1.11271.11271.3.0.dta	3350.38	3	41.92	GVVDSDDLPLNVSR	N2H9F0S0	9-2-0-0-0	-1	0	3	1	0	1	1	16	b2/b3/b4/b5/b6/b7/b8/b9/b10/b12/	y1/y2/y3/y6/y10/y12/	1864.63	1485.75	1562	3	3350.38	1	1	1
1	11274	SunS_13_OVCAR3_HILIC_IntactGlycopeptide_F1.11274.11274.3.0.dta	3188.34	3	41.93	GVVDSDDLPLNVSR	N2H8F0S0	8-2-0-0-0	-2	0	2	1	0	1	0	12	b2/b3/b4/b7/b8/b12/	y1/y2/y3/y6/y7/y12/	1702.58	1485.75	2049	3	3188.34	1	1	1
1	11336	SunS_13_OVCAR3_HILIC_IntactGlycopeptide_F1.11336.11336.3.0.dta	3026.27	3	42.11	GVVDSDDLPLNVSR	N2H7F0S0	7-2-0-0-0	-1	0	2	1	0	1	0	6	b2/b3/	y1/y2/y3/y6/	1540.53	1485.74	2553	3	3026.28	1	1	1
1	11351	SunS_13_OVCAR3_HILIC_IntactGlycopeptide_F1.11351.11351.3.0.dta	3120.35	3	42.16	NLTLMATTSQLPK	N2H8F0S0	8-2-0-0-0	-1	0	2	1	0	1	0	13	b2/b3/b8/b11/	y2/y3/y5/y6/y7/y8/y9/y10/y11/	1702.58	1417.77	#N/A	3	3120.36	1	0	0
1	11360	SunS_13_OVCAR3_HILIC_IntactGlycopeptide_F1.11360.11360.4.0.dta	3810.63	4	42.19	GEGNETTNMVITWKPLR	N2H9F0S0	9-2-0-0-0	-2	0	4	1	1	1	1	10	b2/b5/	y1/y3/y4/y5/y6/y7/y11/y12/	1864.63	1946	#N/A	4	3810.62	1	0	0
1	11364	SunS_13_OVCAR3_HILIC_IntactGlycopeptide_F1.11364.11364.3.0.dta	3810.62	3	42.21	GEGNETTNMVITWKPLR	N2H9F0S0	9-2-0-0-0	0	0	4	1	1	1	1	13	b2/b5/b10/	y1/y3/y4/y5/y6/y7/y8/y9/y11/y12/	1864.63	1945.99	#N/A	3	3810.61	1	0	0
1	11530	SunS_13_OVCAR3_HILIC_IntactGlycopeptide_F1.11530.11530.3.0.dta	2738.22	3	42.84	NLSAPVTLNLR	N2H7F0S0	7-2-0-0-0	-1	0	2	1	0	1	0	9	b2/	y1/y3/y4/y5/y6/y7/y8/y9/	1540.53	1197.7	#N/A	3	2738.23	1	0	0
1	11569	SunS_13_OVCAR3_HILIC_IntactGlycopeptide_F1.11569.11569.3.0.dta	3724.47	3	42.94	QDNETGIYYETWNVK	N2H9F0S0	9-2-0-0-0	-1	0	4	1	1	1	1	24	b2/b3/b4/b5/b6/b7/b8/b9/b10/b13/b14/	y1/y2/y3/y4/y5/y6/y7/y8/y9/y10/y11/y12/y13/	1864.63	1859.84	101	3	3724.48	1	1	1
1	11584	SunS_13_OVCAR3_HILIC_IntactGlycopeptide_F1.11584.11584.3.0.dta	3637.54	3	42.99	ALAGLVYNASGSEHCYDIYR	N2H6F0S0	6-2-0-0-0	-1	0	4	1	1	1	1	22	b2/b3/b4/b5/b6/b7/b9/	y1/y2/y3/y4/y5/y6/y7/y8/y9/y10/y11/y12/y13/y14/y15/	1378.48	2259.06	1382	3	3637.53	1	1	1
1	11596	SunS_13_OVCAR3_HILIC_IntactGlycopeptide_F1.11596.11596.4.0.dta	3637.53	4	43.03	ALAGLVYNASGSEHCYDIYR	N2H6F0S0	6-2-0-0-0	0	0	2	0	1	0	1	21	b2/b3/b4/b5/b6/b9/b13/	y1/y2/y3/y4/y5/y6/y7/y8/y9/y10/y11/y12/y13/y14/	1378.48	2259.05	1812	4	3637.53	1	1	1
1	11628	SunS_13_OVCAR3_HILIC_IntactGlycopeptide_F1.11628.11628.3.0.dta	3475.46	3	43.14	ALAGLVYNASGSEHCYDIYR	N2H5F0S0	5-2-0-0-0	0	0	4	1	1	1	1	19	b2/b4/b5/b6/b9/	y1/y2/y3/y4/y5/y6/y7/y8/y9/y10/y11/y12/y13/y14/	1216.42	2259.04	1419	3	3475.47	1	1	1
1	11631	SunS_13_OVCAR3_HILIC_IntactGlycopeptide_F1.11631.11631.4.0.dta	3475.47	4	43.14	ALAGLVYNASGSEHCYDIYR	N2H5F0S0	5-2-0-0-0	0	0	2	0	1	0	1	10	b2/b4/b5/b6/	y1/y3/y6/y10/y11/y12/	1216.42	2259.05	3630	4	3475.48	1	1	1
1	11724	SunS_13_OVCAR3_HILIC_IntactGlycopeptide_F1.11724.11724.3.0.dta	3151.36	3	43.49	ALAGLVYNASGSEHCYDIYR	N2H3F0S0	3-2-0-0-0	0	0	2	0	1	0	1	21	b2/b3/b4/b5/b6/b13/	y1/y2/y3/y4/y5/y6/y7/y8/y9/y10/y11/y12/y13/y14/y15/	892.317	2259.05	651	3	3151.37	1	1	1
1	11804	SunS_13_OVCAR3_HILIC_IntactGlycopeptide_F1.11804.11804.4.0.dta	4119.79	4	43.79	TVLTPATNHMGNVTFTIPANR	N2H9F0S0	9-2-0-0-0	-2	0	2	0	1	0	1	9	b2/b3/b4/	y1/y4/y5/y6/y7/y8/	1864.63	2255.16	#N/A	4	4119.8	1	0	0
1	11834	SunS_13_OVCAR3_HILIC_IntactGlycopeptide_F1.11834.11834.4.0.dta	3957.74	4	43.89	TVLTPATNHMGNVTFTIPANR	N2H8F0S0	8-2-0-0-0	-2	0	2	0	1	0	1	9	b2/b3/b4/	y1/y4/y5/y6/y7/y8/	1702.58	2255.16	#N/A	4	3957.75	1	0	0
1	11902	SunS_13_OVCAR3_HILIC_IntactGlycopeptide_F1.11902.11902.4.0.dta	4371.73	4	44.12	TAVNCSSDFDACLITK	N5H6F0S2	6-5-2-0-0	-3	0	3	0	1	1	1	6		y2/y3/y5/y6/y7/y11/	2569.9	1801.82	#N/A	2	2187.87	0	1	0
1	11915	SunS_13_OVCAR3_HILIC_IntactGlycopeptide_F1.11915.11915.3.0.dta	3633.63	3	44.16	TVLTPATNHMGNVTFTIPANR	N2H6F0S0	6-2-0-0-0	0	0	2	0	1	0	1	8	b2/b3/b4/	y1/y4/y6/y7/y8/	1378.48	2255.16	3180	3	3633.65	1	0	0
1	11960	SunS_13_OVCAR3_HILIC_IntactGlycopeptide_F1.11960.11960.4.0.dta	4007.6	4	44.29	TAVNCSSDFDACLITK	N4H5F2S1	5-4-1-2-0	-2	0	4	1	1	1	1	16	b2/b3/b4/b5/	y1/y2/y3/y4/y5/y6/y7/y8/y9/y10/y11/y13/	2205.79	1801.81	1260	4	4007.61	1	1	1
1	11961	SunS_13_OVCAR3_HILIC_IntactGlycopeptide_F1.11961.11961.3.0.dta	3561.42	3	44.3	NMSFVNDLTVTQDGR	N2H9F0S0	9-2-0-0-0	0	0	3	1	1	1	0	13	b2/	y2/y3/y4/y5/y6/y7/y8/y9/y10/y11/y12/y13/	1864.63	1696.78	#N/A	3	3561.43	1	0	0
1	11963	SunS_13_OVCAR3_HILIC_IntactGlycopeptide_F1.11963.11963.3.0.dta	4007.58	3	44.3	TAVNCSSDFDACLITK	N4H5F2S1	5-4-1-2-0	-2	0	3	1	0	1	1	14	b2/b4/b9/b14/	y2/y3/y4/y5/y6/y7/y8/y9/y10/y11/	2205.79	1801.79	1324	3	4007.61	1	1	1
1	11980	SunS_13_OVCAR3_HILIC_IntactGlycopeptide_F1.11980.11980.3.0.dta	3399.38	3	44.35	NMSFVNDLTVTQDGR	N2H8F0S0	8-2-0-0-0	-1	0	3	1	1	1	0	16	b2/b3/b5/	y1/y2/y3/y4/y5/y6/y7/y8/y9/y10/y11/y12/y13/	1702.58	1696.79	#N/A	3	3399.38	1	0	0
1	11992	SunS_13_OVCAR3_HILIC_IntactGlycopeptide_F1.11992.11992.5.0.dta	4726.07	5	44.39	VYCNLSAAHTFEDLKNEIKNPEIR	N2H9F0S0	9-2-0-0-0	0	0	2	0	1	0	1	12	b2/b3/b5/b9/	y1/y2/y4/y5/y6/y7/y8/y9/	1864.63	2861.43	4036	5	4727.06	0	1	0
1	12013	SunS_13_OVCAR3_HILIC_IntactGlycopeptide_F1.12013.12013.4.0.dta	3399.37	4	44.45	NMSFVNDLTVTQDGR	N2H8F0S0	8-2-0-0-0	0	0	2	1	0	1	0	17	b2/b3/b5/b6/b7/	y2/y3/y4/y5/y6/y7/y8/y9/y10/y11/y12/y13/	1702.58	1696.78	#N/A	4	3399.37	1	0	0
1	12023	SunS_13_OVCAR3_HILIC_IntactGlycopeptide_F1.12023.12023.4.0.dta	4726.06	4	44.47	VYCNLSAAHTFEDLKNEIKNPEIR	N2H9F0S0	9-2-0-0-0	-2	0	2	0	1	0	1	15	b2/b3/b5/b9/	y1/y2/y4/y5/y6/y7/y8/y9/y10/y11/y15/	1864.63	2861.43	5388	4	4726.05	1	1	1
1	12040	SunS_13_OVCAR3_HILIC_IntactGlycopeptide_F1.12040.12040.4.0.dta	4226.68	4	44.52	TAVNCSSDFDACLITK	N5H6F1S1	6-5-1-1-0	-2	0	3	1	1	1	0	11	b2/b4/	y1/y2/y3/y4/y6/y8/y10/y11/y12/	2424.87	1801.81	2310	4	4226.66	1	1	1
1	12044	SunS_13_OVCAR3_HILIC_IntactGlycopeptide_F1.12044.12044.4.0.dta	3745.59	4	44.53	FLSSSPHLPPSSYFNASGR	N3H4F1S1	4-3-1-1-0	0	0	3	0	1	1	1	8	b3/b5/b7/b8/	y1/y2/y4/y11/	1694.6	2050.99	4630	4	3745.6	1	1	1
1	12055	SunS_13_OVCAR3_HILIC_IntactGlycopeptide_F1.12055.12055.4.0.dta	4007.6	4	44.55	TAVNCSSDFDACLITK	N4H5F2S1	5-4-1-2-0	-2	0	4	1	1	1	1	16	b2/b3/b4/	y1/y2/y3/y4/y5/y6/y7/y8/y9/y10/y11/y12/y13/	2205.79	1801.81	1643	4	4007.6	1	1	1
1	12060	SunS_13_OVCAR3_HILIC_IntactGlycopeptide_F1.12060.12060.4.0.dta	4064.63	4	44.56	TAVNCSSDFDACLITK	N5H5F1S1	5-5-1-1-0	-2	0	4	1	1	1	1	19	b2/b3/b4/b5/b10/b14/	y1/y2/y3/y4/y5/y6/y7/y8/y9/y10/y11/y12/y13/	2262.81	1801.82	533	4	4064.63	1	1	1
1	12072	SunS_13_OVCAR3_HILIC_IntactGlycopeptide_F1.12072.12072.3.0.dta	4007.6	3	44.6	TAVNCSSDFDACLITK	N4H5F2S1	5-4-1-2-0	0	0	2	1	0	1	0	8	b2/b5/	y1/y2/y6/y7/y8/y10/	2205.79	1801.81	3092	3	4007.61	1	1	1
1	12079	SunS_13_OVCAR3_HILIC_IntactGlycopeptide_F1.12079.12079.3.0.dta	3399.37	3	44.61	NMSFVNDLTVTQDGR	N2H8F0S0	8-2-0-0-0	-2	0	2	1	0	1	0	14	b2/b3/	y1/y2/y3/y4/y5/y6/y7/y8/y10/y11/y12/y13/	1702.58	1696.79	#N/A	3	3399.38	1	0	0
1	12084	SunS_13_OVCAR3_HILIC_IntactGlycopeptide_F1.12084.12084.4.0.dta	3861.54	4	44.63	TAVNCSSDFDACLITK	N4H5F1S1	5-4-1-1-0	-2	0	2	1	0	1	0	16	b1/b2/b4/b5/	y2/y3/y4/y5/y6/y7/y8/y9/y10/y11/y12/y13/	2059.73	1801.8	1192	4	3861.55	1	1	1
1	12152	SunS_13_OVCAR3_HILIC_IntactGlycopeptide_F1.12152.12152.3.0.dta	3745.6	3	44.81	FLSSSPHLPPSSYFNASGR	N3H4F1S1	4-3-1-1-0	0	0	2	0	0	1	1	8	b3/b5/b7/b8/	y1/y3/y5/y11/	1694.6	2051	5599	3	3745.6	1	1	1
1	12155	SunS_13_OVCAR3_HILIC_IntactGlycopeptide_F1.12155.12155.4.0.dta	4064.64	4	44.82	TAVNCSSDFDACLITK	N5H5F1S1	5-5-1-1-0	0	0	3	1	1	1	0	8	b2/	y2/y3/y4/y5/y6/y7/y11/	2262.81	1801.82	2340	4	4064.63	1	1	1
1	12221	SunS_13_OVCAR3_HILIC_IntactGlycopeptide_F1.12221.12221.3.0.dta	3745.62	3	45.07	FLSSSPHLPPSSYFNASGR	N3H4F1S1	4-3-1-1-0	-1	0	2	0	0	1	1	6	b3/b7/b8/	y1/y2/y11/	1694.6	2051.01	5380	3	3745.6	1	1	1
1	12440	SunS_13_OVCAR3_HILIC_IntactGlycopeptide_F1.12440.12440.3.0.dta	4077.61	3	45.82	YHYNGSLMDGTLFDSSYSR	N2H9F0S0	9-2-0-0-0	-2	0	3	0	1	1	1	17	b1/b2/b3/b4/b9/	y1/y2/y5/y6/y7/y8/y10/y11/y12/y13/y15/y17/	1864.63	2212.97	#N/A	3	4077.6	1	0	0
1	12445	SunS_13_OVCAR3_HILIC_IntactGlycopeptide_F1.12445.12445.4.0.dta	4147.77	4	45.83	KLCPDCPLLAPLNDSR	N5H6F0S1	6-5-1-0-0	0	0	2	0	0	1	1	8	b1/b3/b5/b6/b9/b10/	y1/y2/	2278.81	1868.96	2861	4	4147.76	1	1	1
1	12471	SunS_13_OVCAR3_HILIC_IntactGlycopeptide_F1.12471.12471.3.0.dta	3915.55	3	45.93	YHYNGSLMDGTLFDSSYSR	N2H8F0S0	8-2-0-0-0	-2	0	3	0	1	1	1	21	b2/b3/b4/b5/b6/b9/	y1/y2/y3/y4/y5/y6/y7/y8/y9/y10/y11/y12/y13/y15/y17/	1702.58	2212.97	#N/A	3	3915.55	1	0	0
1	12480	SunS_13_OVCAR3_HILIC_IntactGlycopeptide_F1.12480.12480.4.0.dta	3915.55	4	45.96	YHYNGSLMDGTLFDSSYSR	N2H8F0S0	8-2-0-0-0	-2	0	2	0	1	0	1	7	b2/b3/	y5/y6/y7/y10/y11/	1702.58	2212.97	#N/A	4	3915.56	1	0	0
1	12541	SunS_13_OVCAR3_HILIC_IntactGlycopeptide_F1.12541.12541.4.0.dta	3643.45	4	46.19	NSSLCALCIGSEK	N4H5F0S2	5-4-2-0-0	0	0	2	1	0	1	0	6		y4/y5/y6/y7/y8/y9/	2204.77	1438.68	3320	4	3643.44	1	1	1
1	12783	SunS_13_OVCAR3_HILIC_IntactGlycopeptide_F1.12783.12783.4.0.dta	3643.44	4	47.1	NSSLCALCIGSEK	N4H5F0S2	5-4-2-0-0	-1	0	2	1	0	1	0	7	b2/	y4/y5/y6/y7/y8/y9/	2204.77	1438.66	2948	4	3643.44	1	1	1
1	12814	SunS_13_OVCAR3_HILIC_IntactGlycopeptide_F1.12814.12814.3.0.dta	3626.49	3	47.19	IFNIDSGNGSIFTSK	N2H10F0S0	10-2-0-0-0	-2	0	4	1	1	1	1	18	b2/b3/b4/b5/b9/	y1/y2/y3/y4/y5/y6/y7/y8/y9/y10/y11/y12/y13/	2026.69	1599.8	1467	3	3626.48	1	1	1
1	12816	SunS_13_OVCAR3_HILIC_IntactGlycopeptide_F1.12816.12816.3.0.dta	3717.58	3	47.2	IFNIDSGNGSIFTSK	N5H5F2S0	5-5-0-2-0	-2	0	3	1	0	1	1	13	b2/b3/b5/b8/b9/	y2/y3/y4/y5/y6/y7/y10/y11/	2117.78	1599.81	3297	3	3717.58	1	1	1
1	12830	SunS_13_OVCAR3_HILIC_IntactGlycopeptide_F1.12830.12830.3.0.dta	3464.45	3	47.25	IFNIDSGNGSIFTSK	N2H9F0S0	9-2-0-0-0	0	0	4	1	1	1	1	18	b2/b3/b4/b5/b6/b12/	y1/y2/y3/y4/y5/y6/y7/y9/y10/y11/y12/y13/	1864.63	1599.81	1212	3	3464.44	1	1	1
1	12831	SunS_13_OVCAR3_HILIC_IntactGlycopeptide_F1.12831.12831.3.0.dta	3050.25	3	47.25	LFNLTSTFSR	N2H9F0S0	9-2-0-0-0	0	0	4	1	1	1	1	12	b2/b3/b4/	y1/y2/y3/y4/y5/y6/y7/y8/y9/	1864.63	1185.62	#N/A	3	3050.26	1	0	0
1	12857	SunS_13_OVCAR3_HILIC_IntactGlycopeptide_F1.12857.12857.3.0.dta	3643.44	3	47.34	NSSLCALCIGSEK	N4H5F0S2	5-4-2-0-0	-1	0	2	1	0	1	0	11	b9/	y1/y4/y5/y6/y7/y8/y9/y10/y11/y12/	2204.77	1438.67	2945	3	3643.44	1	1	1
1	12860	SunS_13_OVCAR3_HILIC_IntactGlycopeptide_F1.12860.12860.4.0.dta	3643.45	4	47.36	NSSLCALCIGSEK	N4H5F0S2	5-4-2-0-0	-1	0	2	1	0	1	0	9	b2/	y4/y5/y6/y7/y8/y9/y10/y11/	2204.77	1438.68	2897	4	3643.44	1	1	1
1	12864	SunS_13_OVCAR3_HILIC_IntactGlycopeptide_F1.12864.12864.3.0.dta	3733.58	3	47.36	IFNIDSGNGSIFTSK	N5H6F1S0	6-5-0-1-0	-2	0	4	1	1	1	1	7	b2/b3/	y2/y3/y4/y6/y7/	2133.77	1599.8	1795	3	3733.57	1	1	1
1	12870	SunS_13_OVCAR3_HILIC_IntactGlycopeptide_F1.12870.12870.3.0.dta	3302.39	3	47.39	IFNIDSGNGSIFTSK	N2H8F0S0	8-2-0-0-0	-1	0	4	1	1	1	1	18	b2/b3/b4/b5/b6/b10/	y1/y2/y3/y4/y5/y6/y7/y9/y10/y11/y12/y13/	1702.58	1599.81	1132	3	3302.39	1	1	1
1	12874	SunS_13_OVCAR3_HILIC_IntactGlycopeptide_F1.12874.12874.4.0.dta	3571.52	4	47.4	IFNIDSGNGSIFTSK	N5H5F1S0	5-5-0-1-0	-1	0	2	1	0	1	0	7	b2/b3/b4/	y1/y2/y3/y4/	1971.72	1599.8	2654	4	3571.52	1	1	1
1	12882	SunS_13_OVCAR3_HILIC_IntactGlycopeptide_F1.12882.12882.3.0.dta	3571.53	3	47.42	IFNIDSGNGSIFTSK	N5H5F1S0	5-5-0-1-0	0	0	4	1	1	1	1	18	b2/b3/b4/b5/b9/b10/b11/b12/	y1/y2/y3/y4/y5/y6/y7/y10/y11/y13/	1971.72	1599.81	799	3	3571.52	1	1	1
1	12892	SunS_13_OVCAR3_HILIC_IntactGlycopeptide_F1.12892.12892.3.0.dta	3717.59	3	47.45	IFNIDSGNGSIFTSK	N5H5F2S0	5-5-0-2-0	-2	0	4	1	1	1	1	14	b2/b3/b4/b5/b9/	y1/y2/y3/y4/y5/y6/y7/y10/y11/	2117.78	1599.82	3067	3	3717.58	1	1	1
1	12893	SunS_13_OVCAR3_HILIC_IntactGlycopeptide_F1.12893.12893.4.0.dta	3717.59	4	47.46	IFNIDSGNGSIFTSK	N5H5F2S0	5-5-0-2-0	-1	0	2	1	0	1	0	6	b2/b3/	y2/y3/y4/y7/	2117.78	1599.81	1832	4	3717.58	1	1	1
1	13001	SunS_13_OVCAR3_HILIC_IntactGlycopeptide_F1.13001.13001.3.0.dta	3877.54	3	47.86	ELGVVMYNCSCLAR	N4H5F2S1	5-4-1-2-0	0	0	2	1	0	1	0	8	b3/b4/b5/	y1/y2/y5/y6/y9/	2205.79	1671.75	10308	3	3877.55	1	0	0
1	13033	SunS_13_OVCAR3_HILIC_IntactGlycopeptide_F1.13033.13033.3.0.dta	2544.13	3	47.97	ENTSDPSLVIAFGR	N2H3F1S0	3-2-0-1-0	-1	0	2	1	0	1	0	8		y2/y4/y5/y6/y9/y10/y11/y12/	1038.38	1505.75	992	3	2544.13	1	1	1
1	13034	SunS_13_OVCAR3_HILIC_IntactGlycopeptide_F1.13034.13034.4.0.dta	4028.69	4	47.97	YGNMTEDHVMHLLQNADPLK	N2H8F0S0	8-2-0-0-0	-2	0	2	0	1	0	1	7	b1/	y1/y3/y4/y7/y8/y11/	1702.58	2326.11	#N/A	4	4028.69	1	0	0
1	13371	SunS_13_OVCAR3_HILIC_IntactGlycopeptide_F1.13371.13371.3.0.dta	3772.54	3	49.43	EPGSNVTMSVDAECVPMVR	N3H4F1S1	4-3-1-1-0	-2	0	4	1	1	1	1	12		y1/y2/y4/y5/y6/y7/y8/y9/y10/y11/y12/y13/	1694.6	2077.94	#N/A	3	3772.55	1	0	0
1	13394	SunS_13_OVCAR3_HILIC_IntactGlycopeptide_F1.13394.13394.3.0.dta	3510.46	3	49.53	QVLSYGQNLSFSFR	N2H9F0S0	9-2-0-0-0	-1	0	2	0	0	1	1	11	b2/b3/b4/	y1/y2/y3/y4/y5/y6/y9/y12/	1864.63	1645.82	1988	3	3510.47	1	1	1
1	13570	SunS_13_OVCAR3_HILIC_IntactGlycopeptide_F1.13570.13570.4.0.dta	4858.11	4	50.31	AHCVWLECPIPDAPVVTNVTVK	N6H7F0S0	7-6-0-0-0	-2	0	1	0	0	0	1	11	b2/b3/b4/b5/b6/b7/b8/b10/b12/	y3/y12/	2352.85	2505.26	2799	4	4858.12	1	1	1
1	13602	SunS_13_OVCAR3_HILIC_IntactGlycopeptide_F1.13602.13602.4.0.dta	4639.05	4	50.46	AHCVWLECPIPDAPVVTNVTVK	N5H6F1S0	6-5-0-1-0	-3	0	2	0	1	0	1	11	b2/b3/b4/b5/b6/b7/b8/b10/b13/	y3/y12/	2133.77	2505.28	1900	4	4639.05	1	1	1
1	13626	SunS_13_OVCAR3_HILIC_IntactGlycopeptide_F1.13626.13626.5.0.dta	4639.04	5	50.54	AHCVWLECPIPDAPVVTNVTVK	N5H6F1S0	6-5-0-1-0	-2	0	1	0	0	0	1	9	b2/b3/b4/b5/b6/b7/b8/b10/	y1/	2133.77	2505.27	#N/A	5	4640.04	0	1	0
1	13636	SunS_13_OVCAR3_HILIC_IntactGlycopeptide_F1.13636.13636.4.0.dta	4492.99	4	50.58	AHCVWLECPIPDAPVVTNVTVK	N5H6F0S0	6-5-0-0-0	0	0	2	0	1	0	1	21	b2/b3/b4/b5/b6/b7/b8/b9/b10/b12/b13/	y1/y2/y3/y4/y6/y9/y10/y12/y14/y15/	1987.71	2505.28	1150	4	4492.98	1	1	1
1	13637	SunS_13_OVCAR3_HILIC_IntactGlycopeptide_F1.13637.13637.5.0.dta	4492.99	5	50.58	AHCVWLECPIPDAPVVTNVTVK	N5H6F0S0	6-5-0-0-0	-2	0	2	0	1	0	1	7	b3/b4/b5/b6/b7/b8/b10/		1987.71	2505.27	1804	5	4492.98	1	1	1
1	13649	SunS_13_OVCAR3_HILIC_IntactGlycopeptide_F1.13649.13649.3.0.dta	4492.96	3	50.65	AHCVWLECPIPDAPVVTNVTVK	N5H6F0S0	6-5-0-0-0	0	0	2	0	1	0	1	12	b2/b3/b4/b5/b6/b7/b8/b9/b10/b13/	y3/y12/	1987.71	2505.25	856	3	4492.97	1	1	1
1	13651	SunS_13_OVCAR3_HILIC_IntactGlycopeptide_F1.13651.13651.4.0.dta	4842.11	4	50.65	AHCVWLECPIPDAPVVTNVTVK	N6H6F1S0	6-6-0-1-0	-2	0	2	0	1	0	1	11	b2/b3/b4/b5/b6/b7/b8/b10/b12/	y3/y12/	2336.85	2505.26	1482	4	4842.13	1	1	1
1	13664	SunS_13_OVCAR3_HILIC_IntactGlycopeptide_F1.13664.13664.5.0.dta	4696.07	5	50.71	AHCVWLECPIPDAPVVTNVTVK	N6H6F0S0	6-6-0-0-0	-2	0	1	0	0	0	1	8	b2/b3/b4/b5/b6/b7/b8/b10/		2190.79	2505.28	#N/A	5	4697.07	0	1	0
1	13668	SunS_13_OVCAR3_HILIC_IntactGlycopeptide_F1.13668.13668.4.0.dta	4639.02	4	50.72	AHCVWLECPIPDAPVVTNVTVK	N5H6F1S0	6-5-0-1-0	-2	0	2	0	1	0	1	10	b2/b3/b4/b5/b6/b7/b8/b10/	y1/y12/	2133.77	2505.25	1699	4	4639.05	1	1	1
1	13674	SunS_13_OVCAR3_HILIC_IntactGlycopeptide_F1.13674.13674.4.0.dta	4369.89	4	50.75	AHCVWLECPIPDAPVVTNVTVK	N2H9F0S0	9-2-0-0-0	0	0	2	0	1	0	1	20	b2/b3/b4/b5/b6/b7/b8/b9/b10/b12/b13/	y1/y2/y3/y4/y7/y9/y10/y12/y14/	1864.63	2505.26	2229	4	4369.91	1	1	1
1	13679	SunS_13_OVCAR3_HILIC_IntactGlycopeptide_F1.13679.13679.4.0.dta	4418.95	4	50.76	AHCVWLECPIPDAPVVTNVTVK	N4H5F0S1	5-4-1-0-0	-4	0	1	0	0	0	1	9	b2/b3/b4/b5/b6/b7/b8/b10/	y3/	1913.68	2505.28	1869	4	4419.98	0	1	0
1	13684	SunS_13_OVCAR3_HILIC_IntactGlycopeptide_F1.13684.13684.3.0.dta	4369.91	3	50.79	AHCVWLECPIPDAPVVTNVTVK	N2H9F0S0	9-2-0-0-0	-2	0	2	0	1	0	1	18	b2/b3/b4/b5/b6/b7/b8/b9/b10/b12/b13/b14/	y1/y3/y4/y9/y12/y14/	1864.63	2505.28	1311	3	4369.9	1	1	1
1	13697	SunS_13_OVCAR3_HILIC_IntactGlycopeptide_F1.13697.13697.3.0.dta	4207.85	3	50.84	AHCVWLECPIPDAPVVTNVTVK	N2H8F0S0	8-2-0-0-0	-3	0	2	0	1	0	1	16	b2/b3/b4/b5/b6/b7/b8/b9/b10/b12/b13/b15/	y1/y3/y12/y14/	1702.58	2505.27	1427	3	4207.85	1	1	1
1	13698	SunS_13_OVCAR3_HILIC_IntactGlycopeptide_F1.13698.13698.4.0.dta	4492.98	4	50.84	AHCVWLECPIPDAPVVTNVTVK	N5H6F0S0	6-5-0-0-0	-2	0	1	0	0	0	1	9	b2/b3/b4/b5/b6/b7/b8/b10/b13/		1987.71	2505.27	2163	4	4492.98	1	1	1
1	13715	SunS_13_OVCAR3_HILIC_IntactGlycopeptide_F1.13715.13715.4.0.dta	4127.84	4	50.9	AHCVWLECPIPDAPVVTNVTVK	N4H5F0S0	5-4-0-0-0	0	0	1	0	0	0	1	10	b2/b3/b4/b5/b6/b7/b8/b10/	y1/y12/	1622.58	2505.26	1601	4	4127.84	1	1	1
1	13721	SunS_13_OVCAR3_HILIC_IntactGlycopeptide_F1.13721.13721.4.0.dta	4045.78	4	50.92	AHCVWLECPIPDAPVVTNVTVK	N2H7F0S0	7-2-0-0-0	0	0	2	0	1	0	1	19	b2/b3/b4/b5/b6/b7/b8/b10/b12/b13/	y1/y3/y4/y5/y6/y9/y10/y12/y14/	1540.53	2505.26	1674	4	4045.79	1	1	1
1	13788	SunS_13_OVCAR3_HILIC_IntactGlycopeptide_F1.13788.13788.4.0.dta	5021.12	4	51.15	LVIHSLDYSDQGNYSCVASTELDVVESR	N2H9F0S0	9-2-0-0-0	-2	0	2	0	1	0	1	17	b5/b6/b7/b10/b16/	y1/y2/y3/y4/y5/y6/y7/y8/y9/y10/y11/y14/	1864.63	3156.48	740	4	5021.12	1	1	1
1	13931	SunS_13_OVCAR3_HILIC_IntactGlycopeptide_F1.13931.13931.4.0.dta	4438.85	4	51.69	KLCPDCPLLAPLNDSR	N5H6F0S2	6-5-2-0-0	0	0	4	1	1	1	1	15	b1/b2/b3/b5/b6/b8/b9/b10/	y1/y2/y3/y6/y7/y8/y13/	2569.9	1868.95	4644	4	4438.86	1	1	1
1	13949	SunS_13_OVCAR3_HILIC_IntactGlycopeptide_F1.13949.13949.4.0.dta	4584.88	4	51.75	VNDSNELGGLTTSGSAEVHK	N5H6F0S2	6-5-2-0-0	-2	0	2	0	0	1	1	6	b6/b11/b12/b15/b16/b19/		2569.9	2014.98	10351	4	4584.9	1	1	1
1	13962	SunS_13_OVCAR3_HILIC_IntactGlycopeptide_F1.13962.13962.5.0.dta	4438.84	5	51.79	KLCPDCPLLAPLNDSR	N5H6F0S2	6-5-2-0-0	-2	0	4	1	1	1	1	12	b1/b2/b3/b5/b6/b8/b9/b10/	y1/y2/y6/y13/	2569.9	1868.94	6134	5	4438.85	1	1	1
1	13973	SunS_13_OVCAR3_HILIC_IntactGlycopeptide_F1.13973.13973.3.0.dta	4438.84	3	51.82	KLCPDCPLLAPLNDSR	N5H6F0S2	6-5-2-0-0	0	0	4	1	1	1	1	11	b1/b3/b5/b6/b8/b9/b10/	y1/y2/y3/y6/	2569.9	1868.94	4731	3	4438.85	1	1	1
1	14015	SunS_13_OVCAR3_HILIC_IntactGlycopeptide_F1.14015.14015.4.0.dta	4438.84	4	51.95	KLCPDCPLLAPLNDSR	N5H6F0S2	6-5-2-0-0	-2	0	4	1	1	1	1	16	b1/b2/b3/b5/b6/b8/b9/b10/b14/	y1/y2/y3/y4/y6/y7/y13/	2569.9	1868.94	6006	4	4438.85	1	1	1
1	14047	SunS_13_OVCAR3_HILIC_IntactGlycopeptide_F1.14047.14047.5.0.dta	4438.84	5	52.06	KLCPDCPLLAPLNDSR	N5H6F0S2	6-5-2-0-0	-2	0	3	0	1	1	1	8	b1/b3/b5/b6/b8/b9/b10/	y2/	2569.9	1868.93	6620	5	4438.85	1	1	1
1	14056	SunS_13_OVCAR3_HILIC_IntactGlycopeptide_F1.14056.14056.3.0.dta	4438.82	3	52.09	KLCPDCPLLAPLNDSR	N5H6F0S2	6-5-2-0-0	-2	0	4	1	1	1	1	8	b2/b3/b5/b6/b8/b9/b10/	y2/	2569.9	1868.92	4487	3	4438.84	1	1	1
1	14096	SunS_13_OVCAR3_HILIC_IntactGlycopeptide_F1.14096.14096.4.0.dta	4438.86	4	52.22	KLCPDCPLLAPLNDSR	N5H6F0S2	6-5-2-0-0	0	0	4	1	1	1	1	19	b1/b2/b3/b5/b6/b7/b8/b9/b10/b12/	y1/y2/y3/y6/y7/y10/y11/y13/y14/	2569.9	1868.95	5967	4	4438.87	1	1	1
1	14167	SunS_13_OVCAR3_HILIC_IntactGlycopeptide_F1.14167.14167.4.0.dta	4219.77	4	52.41	KLCPDCPLLAPLNDSR	N4H5F1S2	5-4-2-1-0	0	0	3	0	1	1	1	6	b1/b3/b5/b9/b10/	y2/	2350.83	1868.94	6013	4	4219.78	1	1	1
1	14189	SunS_13_OVCAR3_HILIC_IntactGlycopeptide_F1.14189.14189.4.0.dta	4438.84	4	52.49	KLCPDCPLLAPLNDSR	N5H6F0S2	6-5-2-0-0	-2	0	4	1	1	1	1	14	b1/b3/b5/b6/b8/b9/b10/	y1/y2/y3/y6/y7/y11/y13/	2569.9	1868.94	6015	4	4438.86	1	1	1
1	14192	SunS_13_OVCAR3_HILIC_IntactGlycopeptide_F1.14192.14192.3.0.dta	4073.73	3	52.49	KLCPDCPLLAPLNDSR	N4H5F0S2	5-4-2-0-0	0	0	2	0	0	1	1	6	b3/b5/b9/b10/	y1/y2/	2204.77	1868.95	4773	3	4073.73	1	1	1
1	14195	SunS_13_OVCAR3_HILIC_IntactGlycopeptide_F1.14195.14195.4.0.dta	4719.98	4	52.51	FASLSVYKPLAGNNSFYGSK	N5H6F0S2	6-5-2-0-0	-2	0	4	1	1	1	1	14	b2/b3/b5/b6/b7/b8/b16/	y1/y3/y4/y5/y7/y10/y12/	2569.9	2150.07	#N/A	4	4720	1	1	1
1	14212	SunS_13_OVCAR3_HILIC_IntactGlycopeptide_F1.14212.14212.5.0.dta	5319.34	5	52.56	FLKPYTLEEQKNLTVCPDGALFEQK	N4H5F1S2	5-4-2-1-0	-2	0	2	0	1	0	1	11	b2/b6/	y2/y4/y7/y8/y9/y10/y11/y12/y13/	2350.83	2968.51	12048	5	5320.35	0	1	0
1	14229	SunS_13_OVCAR3_HILIC_IntactGlycopeptide_F1.14229.14229.3.0.dta	4438.85	3	52.63	KLCPDCPLLAPLNDSR	N5H6F0S2	6-5-2-0-0	-2	0	4	1	1	1	1	7	b1/b3/b5/b9/b10/	y1/y2/	2569.9	1868.95	5501	3	4438.85	1	1	1
1	14240	SunS_13_OVCAR3_HILIC_IntactGlycopeptide_F1.14240.14240.5.0.dta	5522.42	5	52.66	FLKPYTLEEQKNLTVCPDGALFEQK	N5H5F1S2	5-5-2-1-0	-3	0	2	0	1	0	1	9	b3/b11/	y4/y5/y7/y9/y10/y12/y13/	2553.91	2968.51	12763	5	5523.45	0	1	0
1	14267	SunS_13_OVCAR3_HILIC_IntactGlycopeptide_F1.14267.14267.4.0.dta	4438.84	4	52.75	KLCPDCPLLAPLNDSR	N5H6F0S2	6-5-2-0-0	-2	0	4	1	1	1	1	18	b1/b2/b3/b5/b6/b7/b8/b9/b10/b12/	y1/y2/y3/y6/y7/y11/y13/y14/	2569.9	1868.94	5777	4	4438.87	1	1	1
1	14271	SunS_13_OVCAR3_HILIC_IntactGlycopeptide_F1.14271.14271.4.0.dta	4720.01	4	52.76	FASLSVYKPLAGNNSFYGSK	N5H6F0S2	6-5-2-0-0	-2	0	4	1	1	1	1	20	b2/b3/b4/b5/b6/b7/b8/b10/b13/b16/	y1/y3/y4/y5/y6/y7/y9/y12/y13/y14/	2569.9	2150.11	#N/A	4	4720	1	1	1
1	14292	SunS_13_OVCAR3_HILIC_IntactGlycopeptide_F1.14292.14292.5.0.dta	4438.83	5	52.84	KLCPDCPLLAPLNDSR	N5H6F0S2	6-5-2-0-0	0	0	4	1	1	1	1	10	b1/b3/b5/b6/b8/b9/b10/	y2/y6/y7/	2569.9	1868.93	#N/A	5	4438.85	1	1	1
1	14297	SunS_13_OVCAR3_HILIC_IntactGlycopeptide_F1.14297.14297.3.0.dta	4073.71	3	52.86	KLCPDCPLLAPLNDSR	N4H5F0S2	5-4-2-0-0	0	0	3	0	1	1	1	6	b1/b3/b5/b8/b10/	y2/	2204.77	1868.94	4589	3	4073.71	1	1	1
1	14305	SunS_13_OVCAR3_HILIC_IntactGlycopeptide_F1.14305.14305.4.0.dta	4073.73	4	52.88	KLCPDCPLLAPLNDSR	N4H5F0S2	5-4-2-0-0	0	0	4	1	1	1	1	11	b1/b3/b5/b6/b8/b9/b10/	y1/y2/y3/y6/	2204.77	1868.95	5789	4	4073.72	1	1	1
1	14337	SunS_13_OVCAR3_HILIC_IntactGlycopeptide_F1.14337.14337.4.0.dta	4438.85	4	53	KLCPDCPLLAPLNDSR	N5H6F0S2	6-5-2-0-0	0	0	4	1	1	1	1	12	b1/b2/b3/b5/b6/b8/b9/b10/	y1/y2/y3/y6/	2569.9	1868.94	#N/A	4	4438.85	1	1	1
1	14350	SunS_13_OVCAR3_HILIC_IntactGlycopeptide_F1.14350.14350.4.0.dta	4184.84	4	53.06	IFPSGNVTSVLELSSNPAHR	N4H5F1S1	5-4-1-1-0	-2	0	3	0	1	1	1	6		y1/y4/y7/y8/y10/y13/	2059.73	2125.11	3860	4	4184.84	1	1	1
1	14370	SunS_13_OVCAR3_HILIC_IntactGlycopeptide_F1.14370.14370.4.0.dta	4073.72	4	53.14	KLCPDCPLLAPLNDSR	N4H5F0S2	5-4-2-0-0	0	0	2	0	0	1	1	8	b1/b3/b5/b6/b8/b9/b10/	y2/	2204.77	1868.95	6750	4	4073.71	1	1	1
1	14392	SunS_13_OVCAR3_HILIC_IntactGlycopeptide_F1.14392.14392.4.0.dta	4368	4	53.26	VANLTEPVVLTFQHQLQPK	N4H5F2S1	5-4-1-2-0	0	0	4	1	1	1	1	9	b4/b6/b12/	y2/y9/y10/y11/y13/y14/	2205.79	2162.2	6204	4	4368	1	1	1
1	14396	SunS_13_OVCAR3_HILIC_IntactGlycopeptide_F1.14396.14396.4.0.dta	4038.79	4	53.27	IFPSGNVTSVLELSSNPAHR	N4H5F0S1	5-4-1-0-0	0	0	2	0	1	0	1	8	b2/	y1/y4/y6/y7/y8/y12/y13/	1913.68	2125.11	4609	4	4038.79	1	1	1
1	14413	SunS_13_OVCAR3_HILIC_IntactGlycopeptide_F1.14413.14413.4.0.dta	4425.01	4	53.33	VANLTEPVVLTFQHQLQPK	N5H5F1S1	5-5-1-1-0	-3	0	2	0	1	0	1	9	b4/b6/b12/	y2/y8/y9/y10/y13/y14/	2262.81	2162.2	#N/A	2	2213.51	0	1	0
1	14446	SunS_13_OVCAR3_HILIC_IntactGlycopeptide_F1.14446.14446.4.0.dta	4221.94	4	53.46	VANLTEPVVLTFQHQLQPK	N4H5F1S1	5-4-1-1-0	-2	0	2	0	1	0	1	10	b4/b6/b12/	y2/y6/y7/y9/y10/y11/y13/	2059.73	2162.21	4011	4	4221.94	1	1	1
1	14451	SunS_13_OVCAR3_HILIC_IntactGlycopeptide_F1.14451.14451.4.0.dta	4262.95	4	53.48	VANLTEPVVLTFQHQLQPK	N5H4F1S1	4-5-1-1-0	0	0	2	0	1	0	1	10	b3/b4/b12/	y2/y3/y6/y10/y13/y14/y15/	2100.76	2162.19	5788	4	4262.96	1	1	1
1	14863	SunS_13_OVCAR3_HILIC_IntactGlycopeptide_F1.14863.14863.4.0.dta	4482.96	4	55.63	IDGGPVILLQAGTPHNLTCR	N4H5F1S2	5-4-2-1-0	0	0	3	0	1	1	1	6	b6/b7/b8/b11/	y1/y3/	2350.83	2132.13	#N/A	4	4482.97	1	1	1
1	14880	SunS_13_OVCAR3_HILIC_IntactGlycopeptide_F1.14880.14880.4.0.dta	4893.16	4	55.72	DTWGLSDEHFQPRPEAVQFFNVTTLQK	N2H8F0S0	8-2-0-0-0	-2	0	2	0	1	0	1	10	b2/b3/b4/b10/b11/	y1/y2/y3/y4/y5/	1702.58	3190.57	6875	4	4893.15	1	1	1
1	14891	SunS_13_OVCAR3_HILIC_IntactGlycopeptide_F1.14891.14891.5.0.dta	4893.15	5	55.77	DTWGLSDEHFQPRPEAVQFFNVTTLQK	N2H8F0S0	8-2-0-0-0	-1	0	1	0	0	0	1	7	b2/b4/b10/	y1/y2/y4/y5/	1702.58	3190.57	#N/A	5	4893.18	1	1	1
1	14911	SunS_13_OVCAR3_HILIC_IntactGlycopeptide_F1.14911.14911.3.0.dta	3402.48	3	55.85	GPLANPIWNVTGFTGR	N2H8F0S0	8-2-0-0-0	-2	0	4	1	1	1	1	15	b2/b3/b4/b5/b7/	y2/y3/y4/y5/y6/y7/y8/y11/y12/y13/	1702.58	1699.9	1529	3	3402.48	1	1	1
1	14924	SunS_13_OVCAR3_HILIC_IntactGlycopeptide_F1.14924.14924.4.0.dta	4569.05	4	55.91	DTWGLSDEHFQPRPEAVQFFNVTTLQK	N2H6F0S0	6-2-0-0-0	-2	0	2	0	1	0	1	14	b2/b4/b5/b6/b9/b10/b11/	y1/y2/y3/y4/y5/y6/y12/	1378.48	3190.57	4810	4	4569.04	1	1	1
1	14940	SunS_13_OVCAR3_HILIC_IntactGlycopeptide_F1.14940.14940.3.0.dta	3240.42	3	55.98	GPLANPIWNVTGFTGR	N2H7F0S0	7-2-0-0-0	-1	0	4	1	1	1	1	16	b2/b3/b4/b5/b7/	y2/y3/y4/y5/y6/y7/y8/y9/y11/y12/y13/	1540.53	1699.89	1178	3	3240.42	1	1	1
1	14961	SunS_13_OVCAR3_HILIC_IntactGlycopeptide_F1.14961.14961.3.0.dta	3227.46	3	56.09	TALFPDLLAQGNASLR	N2H7F0S0	7-2-0-0-0	-1	0	2	1	0	1	0	8	b2/b3/b4/b8/	y1/y3/y4/y12/	1540.53	1686.93	3155	3	3227.45	1	1	1
1	14973	SunS_13_OVCAR3_HILIC_IntactGlycopeptide_F1.14973.14973.4.0.dta	4290.8	4	56.14	TEAGAFEYVPDPTFENFTGGVK	N4H5F2S0	5-4-0-2-0	-1	0	2	0	1	1	0	11	b2/b3/b5/b7/b8/b9/	y1/y4/y6/y11/y13/	1914.7	2376.1	5766	4	4290.79	1	1	1
1	15043	SunS_13_OVCAR3_HILIC_IntactGlycopeptide_F1.15043.15043.3.0.dta	4355.9	3	56.5	TAADTTGLQPILNQFTPANISR	N2H10F0S0	10-2-0-0-0	-2	0	2	0	1	1	0	19	b2/b4/b5/b6/b7/b8/b9/b11/b12/	y1/y2/y3/y6/y7/y9/y10/y11/y13/y14/	2026.69	2329.21	3490	3	4355.91	1	1	1
1	15079	SunS_13_OVCAR3_HILIC_IntactGlycopeptide_F1.15079.15079.3.0.dta	4193.84	3	56.62	TAADTTGLQPILNQFTPANISR	N2H9F0S0	9-2-0-0-0	-2	0	3	0	1	1	1	27	b2/b3/b4/b5/b6/b7/b8/b9/b10/b11/b12/b13/b14/b15/b16/b17/	y1/y2/y3/y6/y7/y8/y9/y10/y11/y13/y14/	1864.63	2329.21	3335	3	4193.85	1	1	1
1	15091	SunS_13_OVCAR3_HILIC_IntactGlycopeptide_F1.15091.15091.5.0.dta	4193.86	5	56.66	TAADTTGLQPILNQFTPANISR	N2H9F0S0	9-2-0-0-0	-2	0	1	0	0	0	1	15	b2/b3/b4/b5/b6/b7/b8/b9/b11/b12/	y1/y2/y3/y6/y13/	1864.63	2329.23	5424	5	4193.85	1	1	1
1	15145	SunS_13_OVCAR3_HILIC_IntactGlycopeptide_F1.15145.15145.4.0.dta	4193.86	4	56.82	TAADTTGLQPILNQFTPANISR	N2H9F0S0	9-2-0-0-0	-2	0	3	0	1	1	1	28	b1/b2/b3/b4/b5/b6/b7/b8/b9/b10/b11/b12/b13/b14/b15/b16/	y1/y2/y3/y6/y7/y8/y9/y10/y11/y12/y13/y14/	1864.63	2329.22	5431	4	4193.86	1	1	1
1	15162	SunS_13_OVCAR3_HILIC_IntactGlycopeptide_F1.15162.15162.3.0.dta	4193.84	3	56.87	TAADTTGLQPILNQFTPANISR	N2H9F0S0	9-2-0-0-0	-2	0	1	0	1	0	0	19	b2/b3/b4/b5/b6/b7/b8/b9/b11/b12/	y1/y2/y3/y6/y7/y8/y10/y13/y14/	1864.63	2329.2	3154	3	4193.85	1	1	1
1	15181	SunS_13_OVCAR3_HILIC_IntactGlycopeptide_F1.15181.15181.4.0.dta	4031.81	4	56.93	TAADTTGLQPILNQFTPANISR	N2H8F0S0	8-2-0-0-0	-2	0	1	0	0	0	1	24	b2/b3/b4/b5/b6/b7/b8/b9/b10/b11/b12/b13/b14/	y1/y2/y3/y6/y7/y8/y9/y10/y11/y13/y14/	1702.58	2329.23	3631	4	4031.8	1	1	1
1	15190	SunS_13_OVCAR3_HILIC_IntactGlycopeptide_F1.15190.15190.3.0.dta	4031.79	3	56.96	TAADTTGLQPILNQFTPANISR	N2H8F0S0	8-2-0-0-0	-2	0	1	0	0	0	1	16	b2/b4/b5/b6/b7/b8/b9/b11/	y1/y2/y3/y6/y7/y8/y10/y13/	1702.58	2329.21	3162	3	4031.8	1	1	1
1	15255	SunS_13_OVCAR3_HILIC_IntactGlycopeptide_F1.15255.15255.3.0.dta	3615.54	3	57.22	DYYPINESLASLPLR	N2H9F0S0	9-2-0-0-0	-1	0	2	1	0	1	0	15	b2/b3/b4/b7/	y1/y3/y4/y5/y6/y7/y8/y9/y10/y12/y13/	1864.63	1750.9	583	3	3615.54	1	1	1
1	15263	SunS_13_OVCAR3_HILIC_IntactGlycopeptide_F1.15263.15263.3.0.dta	3453.47	3	57.26	DYYPINESLASLPLR	N2H8F0S0	8-2-0-0-0	-1	0	2	1	0	1	0	16	b2/b3/b4/b7/b10/	y1/y3/y4/y5/y6/y7/y8/y9/y10/y12/y13/	1702.58	1750.89	475	3	3453.49	1	1	1
1	15299	SunS_13_OVCAR3_HILIC_IntactGlycopeptide_F1.15299.15299.4.0.dta	4379.96	4	57.4	VNVVNSTLAEVHWDPVPLK	N5H5F1S1	5-5-1-1-0	0	0	3	0	1	1	1	9	b2/b3/b4/b12/	y1/y3/y5/y8/y11/	2262.81	2117.15	2958	4	4379.97	1	1	1
1	15324	SunS_13_OVCAR3_HILIC_IntactGlycopeptide_F1.15324.15324.3.0.dta	3453.48	3	57.51	DYYPINESLASLPLR	N2H8F0S0	8-2-0-0-0	-1	0	2	1	0	1	0	13	b2/b3/b4/	y1/y3/y4/y5/y6/y7/y8/y9/y10/y12/	1702.58	1750.9	1495	3	3453.49	1	1	1
1	15334	SunS_13_OVCAR3_HILIC_IntactGlycopeptide_F1.15334.15334.4.0.dta	4176.86	4	57.55	VNVVNSTLAEVHWDPVPLK	N4H5F1S1	5-4-1-1-0	0	0	2	0	1	0	1	7	b2/b3/	y1/y3/y5/y8/y10/	2059.73	2117.12	2275	4	4176.87	1	1	1
1	15416	SunS_13_OVCAR3_HILIC_IntactGlycopeptide_F1.15416.15416.3.0.dta	3129.37	3	57.78	DYYPINESLASLPLR	N2H6F0S0	6-2-0-0-0	-2	0	2	1	0	1	0	10	b2/	y1/y3/y4/y5/y6/y7/y8/y9/y12/	1378.48	1750.9	1008	3	3129.38	1	1	1
1	15460	SunS_13_OVCAR3_HILIC_IntactGlycopeptide_F1.15460.15460.3.0.dta	3772.67	3	57.98	NVTTVLNDPNPIWLVGR	N2H9F0S0	9-2-0-0-0	-1	0	3	1	1	1	0	18	b2/b5/b6/b9/	y1/y2/y3/y4/y5/y7/y8/y9/y10/y11/y12/y13/y14/y15/	1864.63	1908.03	11475	3	3771.63	0	1	0
1	15661	SunS_13_OVCAR3_HILIC_IntactGlycopeptide_F1.15661.15661.4.0.dta	4380.94	4	58.77	RQDVNITVATVPSWLK	N5H5F1S2	5-5-2-1-0	-2	0	2	0	0	1	1	9	b2/b3/b13/	y1/y2/y3/y5/y8/y10/	2553.91	1827.03	6235	4	4380.93	1	1	1
1	15792	SunS_13_OVCAR3_HILIC_IntactGlycopeptide_F1.15792.15792.4.0.dta	3896.57	4	59.33	TFMLAASWNGTK	N5H6F0S2	6-5-2-0-0	0	0	3	1	0	1	1	6	b2/b3/b7/	y4/y5/y7/	2569.9	1326.66	#N/A	4	3896.56	1	0	0
1	15974	SunS_13_OVCAR3_HILIC_IntactGlycopeptide_F1.15974.15974.5.0.dta	4729.95	5	60.14	KLCPDCPLLAPLNDSR	N5H6F0S3	6-5-3-0-0	-3	0	3	0	1	1	1	6	b3/b5/b6/b9/b10/	y2/	2861	1868.95	9720	5	4729.94	1	1	1
1	15989	SunS_13_OVCAR3_HILIC_IntactGlycopeptide_F1.15989.15989.4.0.dta	4729.96	4	60.21	KLCPDCPLLAPLNDSR	N5H6F0S3	6-5-3-0-0	-2	0	4	1	1	1	1	12	b1/b3/b5/b6/b8/b9/b10/	y1/y2/y3/y6/y11/	2861	1868.96	7906	4	4729.95	1	1	1
1	16066	SunS_13_OVCAR3_HILIC_IntactGlycopeptide_F1.16066.16066.4.0.dta	4310.75	4	60.61	LCPDCPLLAPLNDSR	N5H6F0S2	6-5-2-0-0	0	0	2	0	0	1	1	6	b2/b5/b7/b8/b9/	y2/	2569.9	1740.84	#N/A	4	4310.75	1	1	1
1	16089	SunS_13_OVCAR3_HILIC_IntactGlycopeptide_F1.16089.16089.4.0.dta	4729.92	4	60.72	KLCPDCPLLAPLNDSR	N5H6F0S3	6-5-3-0-0	-2	0	4	1	1	1	1	10	b1/b3/b5/b6/b8/b9/b10/	y1/y2/y3/	2861	1868.92	8002	4	4729.94	1	1	1
1	16222	SunS_13_OVCAR3_HILIC_IntactGlycopeptide_F1.16222.16222.3.0.dta	3664.52	3	61.37	LNISTDDLPGLR	N4H5F1S2	5-4-2-1-0	-2	0	2	1	0	1	0	6		y1/y4/y5/y6/y8/y9/	2350.83	1313.69	5387	3	3664.54	1	1	1
1	16233	SunS_13_OVCAR3_HILIC_IntactGlycopeptide_F1.16233.16233.3.0.dta	4310.72	3	61.41	LCPDCPLLAPLNDSR	N5H6F0S2	6-5-2-0-0	-2	0	2	0	0	1	1	6	b2/b5/b8/b9/	y2/y6/	2569.9	1740.82	6349	3	4310.75	1	1	1
1	16285	SunS_13_OVCAR3_HILIC_IntactGlycopeptide_F1.16285.16285.4.0.dta	4310.76	4	61.63	LCPDCPLLAPLNDSR	N5H6F0S2	6-5-2-0-0	-2	0	4	1	1	1	1	15	b2/b3/b4/b5/b6/b7/b8/b9/	y1/y2/y3/y6/y7/y11/y13/	2569.9	1740.86	5338	4	4310.76	1	1	1
1	16292	SunS_13_OVCAR3_HILIC_IntactGlycopeptide_F1.16292.16292.3.0.dta	4310.73	3	61.67	LCPDCPLLAPLNDSR	N5H6F0S2	6-5-2-0-0	-2	0	2	0	0	1	1	7	b2/b5/b7/b8/b9/	y2/y3/	2569.9	1740.83	4808	3	4310.75	1	1	1
1	16390	SunS_13_OVCAR3_HILIC_IntactGlycopeptide_F1.16390.16390.4.0.dta	4310.76	4	62.15	LCPDCPLLAPLNDSR	N5H6F0S2	6-5-2-0-0	0	0	4	1	1	1	1	15	b2/b3/b4/b5/b6/b7/b8/b9/	y1/y2/y3/y6/y7/y10/y13/	2569.9	1740.85	#N/A	4	4310.76	1	1	1
1	16445	SunS_13_OVCAR3_HILIC_IntactGlycopeptide_F1.16445.16445.3.0.dta	4310.74	3	62.31	LCPDCPLLAPLNDSR	N5H6F0S2	6-5-2-0-0	0	0	4	1	1	1	1	18	b2/b3/b4/b5/b6/b7/b8/b9/b11/	y1/y2/y3/y6/y7/y8/y10/y11/y13/	2569.9	1740.83	3800	3	4310.75	1	1	1
1	16475	SunS_13_OVCAR3_HILIC_IntactGlycopeptide_F1.16475.16475.4.0.dta	4310.74	4	62.42	LCPDCPLLAPLNDSR	N5H6F0S2	6-5-2-0-0	-2	0	4	1	1	1	1	16	b2/b3/b4/b5/b6/b7/b8/b9/b11/	y1/y2/y3/y6/y7/y10/y13/	2569.9	1740.84	#N/A	4	4310.75	1	1	1
1	16515	SunS_13_OVCAR3_HILIC_IntactGlycopeptide_F1.16515.16515.3.0.dta	3945.61	3	62.53	LCPDCPLLAPLNDSR	N4H5F0S2	5-4-2-0-0	0	0	4	1	1	1	1	16	b2/b3/b4/b5/b6/b7/b8/b9/	y1/y2/y3/y6/y7/y10/y11/y13/	2204.77	1740.84	5081	3	3945.62	1	1	1
1	16520	SunS_13_OVCAR3_HILIC_IntactGlycopeptide_F1.16520.16520.3.0.dta	4604.9	3	62.54	LCPDCPLLAPLNDSR	N7H8F1S0	8-7-0-1-0	-4	0	2	0	0	1	1	6	b2/b5/b8/b9/	y2/y6/	2864.04	1740.86	#N/A	3	4607.87	0	1	0
1	16524	SunS_13_OVCAR3_HILIC_IntactGlycopeptide_F1.16524.16524.4.0.dta	3945.61	4	62.56	LCPDCPLLAPLNDSR	N4H5F0S2	5-4-2-0-0	-2	0	4	1	1	1	1	18	b2/b3/b4/b5/b6/b7/b8/b9/b13/	y1/y2/y3/y6/y7/y8/y10/y11/y13/	2204.77	1740.84	#N/A	4	3945.63	1	1	1
1	16579	SunS_13_OVCAR3_HILIC_IntactGlycopeptide_F1.16579.16579.3.0.dta	3945.61	3	62.79	LCPDCPLLAPLNDSR	N4H5F0S2	5-4-2-0-0	-1	0	4	1	1	1	1	13	b2/b3/b5/b6/b7/b8/b9/	y1/y2/y6/y7/y10/y13/	2204.77	1740.84	3905	3	3945.62	1	1	1
1	16610	SunS_13_OVCAR3_HILIC_IntactGlycopeptide_F1.16610.16610.4.0.dta	4310.76	4	62.93	LCPDCPLLAPLNDSR	N5H6F0S2	6-5-2-0-0	-2	0	2	1	0	1	0	11	b2/b3/b4/b5/b6/b7/b8/b9/	y1/y2/y6/	2569.9	1740.86	6124	4	4310.75	1	1	1
1	16632	SunS_13_OVCAR3_HILIC_IntactGlycopeptide_F1.16632.16632.3.0.dta	3945.63	3	63.04	LCPDCPLLAPLNDSR	N4H5F0S2	5-4-2-0-0	0	0	3	1	0	1	1	13	b2/b3/b5/b6/b7/b8/b9/	y1/y2/y3/y6/y7/y13/	2204.77	1740.85	#N/A	3	3945.62	1	1	1
1	16638	SunS_13_OVCAR3_HILIC_IntactGlycopeptide_F1.16638.16638.4.0.dta	3945.63	4	63.07	LCPDCPLLAPLNDSR	N4H5F0S2	5-4-2-0-0	-1	0	3	1	0	1	1	15	b2/b3/b5/b6/b7/b8/b9/	y1/y2/y3/y6/y7/y10/y11/y13/	2204.77	1740.86	12566	4	3945.62	1	1	1
1	16664	SunS_13_OVCAR3_HILIC_IntactGlycopeptide_F1.16664.16664.4.0.dta	4310.73	4	63.19	LCPDCPLLAPLNDSR	N5H6F0S2	6-5-2-0-0	-2	0	4	1	1	1	1	12	b2/b3/b5/b6/b7/b8/b9/	y1/y2/y3/y6/y13/	2569.9	1740.83	#N/A	4	4310.75	1	1	1
1	16699	SunS_13_OVCAR3_HILIC_IntactGlycopeptide_F1.16699.16699.3.0.dta	3945.64	3	63.29	LCPDCPLLAPLNDSR	N4H5F0S2	5-4-2-0-0	0	0	4	1	1	1	1	17	b2/b3/b4/b5/b6/b7/b8/b9/	y1/y2/y3/y6/y7/y8/y10/y11/y13/	2204.77	1740.86	#N/A	3	3945.62	1	1	1
1	16715	SunS_13_OVCAR3_HILIC_IntactGlycopeptide_F1.16715.16715.4.0.dta	3945.61	4	63.34	LCPDCPLLAPLNDSR	N4H5F0S2	5-4-2-0-0	-2	0	4	1	1	1	1	17	b2/b3/b4/b5/b6/b7/b8/b9/	y1/y2/y3/y6/y7/y8/y10/y11/y13/	2204.77	1740.84	13031	4	3945.65	1	1	1
1	16771	SunS_13_OVCAR3_HILIC_IntactGlycopeptide_F1.16771.16771.3.0.dta	3945.63	3	63.55	LCPDCPLLAPLNDSR	N4H5F0S2	5-4-2-0-0	0	0	4	1	1	1	1	15	b2/b3/b4/b5/b6/b7/b8/b9/	y1/y2/y3/y6/y7/y10/y13/	2204.77	1740.86	12672	3	3945.62	1	1	1
1	16782	SunS_13_OVCAR3_HILIC_IntactGlycopeptide_F1.16782.16782.4.0.dta	3945.6	4	63.59	LCPDCPLLAPLNDSR	N4H5F0S2	5-4-2-0-0	-2	0	4	1	1	1	1	17	b2/b3/b4/b5/b6/b7/b8/b9/	y1/y2/y3/y6/y7/y8/y10/y11/y13/	2204.77	1740.83	#N/A	4	3945.64	1	1	1
1	16830	SunS_13_OVCAR3_HILIC_IntactGlycopeptide_F1.16830.16830.3.0.dta	3945.62	3	63.81	LCPDCPLLAPLNDSR	N4H5F0S2	5-4-2-0-0	-2	0	3	1	0	1	1	11	b2/b4/b5/b6/b7/b8/b9/	y1/y2/y6/y10/	2204.77	1740.85	4399	3	3945.62	1	1	1
1	16843	SunS_13_OVCAR3_HILIC_IntactGlycopeptide_F1.16843.16843.4.0.dta	3945.63	4	63.85	LCPDCPLLAPLNDSR	N4H5F0S2	5-4-2-0-0	-2	0	3	1	0	1	1	10	b2/b4/b5/b7/b8/b9/	y2/y3/y6/y13/	2204.77	1740.86	#N/A	4	3945.62	1	1	1
1	16887	SunS_13_OVCAR3_HILIC_IntactGlycopeptide_F1.16887.16887.7.0.dta	6241.67	7	64.03	RPTGEVYDIEIDTLETTCHVLDPTPLANCSVR	N5H6F0S2	6-5-2-0-0	-3	0	1	0	0	0	1	15	b2/b5/b6/b7/b8/b9/b10/b11/b12/b15/	y1/y3/y4/y10/y11/	2569.9	3671.76	12261	7	6244.68	0	1	0
1	16898	SunS_13_OVCAR3_HILIC_IntactGlycopeptide_F1.16898.16898.3.0.dta	3945.6	3	64.07	LCPDCPLLAPLNDSR	N4H5F0S2	5-4-2-0-0	0	0	3	1	0	1	1	13	b2/b3/b5/b6/b7/b8/b9/	y1/y2/y3/y6/y7/y13/	2204.77	1740.83	13214	3	3945.62	1	1	1
1	16903	SunS_13_OVCAR3_HILIC_IntactGlycopeptide_F1.16903.16903.5.0.dta	5950.57	5	64.08	RPTGEVYDIEIDTLETTCHVLDPTPLANCSVR	N5H6F0S1	6-5-1-0-0	-3	0	1	0	0	0	1	7	b2/b5/b8/b10/b12/b15/	y1/	2278.81	3671.76	9750	5	5950.57	1	1	1
1	16908	SunS_13_OVCAR3_HILIC_IntactGlycopeptide_F1.16908.16908.4.0.dta	4476.99	4	64.09	DVVTAAGDMLKDNATEEEILVYLEK	N3H5F0S1	5-3-1-0-0	-2	0	2	0	1	0	1	18	b2/b3/b4/b5/b6/b14/	y1/y2/y3/y4/y5/y6/y7/y8/y9/y10/y11/y12/	1710.6	2766.39	3533	4	4476.98	1	0	0
1	16920	SunS_13_OVCAR3_HILIC_IntactGlycopeptide_F1.16920.16920.4.0.dta	3945.63	4	64.13	LCPDCPLLAPLNDSR	N4H5F0S2	5-4-2-0-0	-1	0	4	1	1	1	1	16	b2/b3/b4/b5/b6/b7/b8/b9/	y1/y2/y3/y6/y7/y10/y11/y13/	2204.77	1740.85	13578	4	3945.62	1	1	1
1	16943	SunS_13_OVCAR3_HILIC_IntactGlycopeptide_F1.16943.16943.5.0.dta	6241.69	5	64.18	RPTGEVYDIEIDTLETTCHVLDPTPLANCSVR	N5H6F0S2	6-5-2-0-0	-3	0	2	0	1	0	1	25	b2/b3/b4/b5/b6/b7/b8/b9/b10/b11/b12/b13/b14/b15/b16/b17/b18/b22/	y1/y3/y4/y8/y10/y17/y20/	2569.9	3671.79	#N/A	5	6242.69	0	1	0
1	16954	SunS_13_OVCAR3_HILIC_IntactGlycopeptide_F1.16954.16954.6.0.dta	6241.65	6	64.21	RPTGEVYDIEIDTLETTCHVLDPTPLANCSVR	N5H6F0S2	6-5-2-0-0	-3	0	2	0	1	0	1	29	b1/b2/b3/b5/b6/b7/b8/b9/b10/b11/b12/b13/b14/b15/b16/b17/b18/b22/	y1/y3/y4/y5/y6/y8/y10/y11/y12/y13/y17/	2569.9	3671.75	6139	6	6241.68	1	1	1
1	16955	SunS_13_OVCAR3_HILIC_IntactGlycopeptide_F1.16955.16955.4.0.dta	6241.66	4	64.21	RPTGEVYDIEIDTLETTCHVLDPTPLANCSVR	N5H6F0S2	6-5-2-0-0	-4	0	2	0	1	0	1	26	b1/b2/b3/b4/b5/b6/b7/b8/b9/b10/b11/b12/b13/b14/b15/b16/b17/b18/b22/	y1/y3/y4/y10/y11/y12/y17/	2569.9	3671.75	#N/A	2	3121.35	0	1	0
1	16999	SunS_13_OVCAR3_HILIC_IntactGlycopeptide_F1.16999.16999.7.0.dta	6241.68	7	64.32	RPTGEVYDIEIDTLETTCHVLDPTPLANCSVR	N5H6F0S2	6-5-2-0-0	-3	0	1	0	0	0	1	26	b1/b2/b3/b5/b6/b7/b8/b9/b10/b11/b12/b13/b14/b15/b17/b18/b22/	y1/y3/y4/y5/y8/y10/y11/y12/y17/	2569.9	3671.77	13340	7	6244.68	0	1	0
1	17062	SunS_13_OVCAR3_HILIC_IntactGlycopeptide_F1.17062.17062.5.0.dta	6241.64	5	64.46	RPTGEVYDIEIDTLETTCHVLDPTPLANCSVR	N5H6F0S2	6-5-2-0-0	-3	0	2	0	1	0	1	23	b1/b2/b3/b5/b6/b7/b8/b9/b10/b11/b12/b13/b14/b15/b17/b18/b22/	y1/y3/y4/y8/y10/y17/	2569.9	3671.74	#N/A	5	6242.69	0	1	0
1	17083	SunS_13_OVCAR3_HILIC_IntactGlycopeptide_F1.17083.17083.6.0.dta	6241.69	6	64.51	RPTGEVYDIEIDTLETTCHVLDPTPLANCSVR	N5H6F0S2	6-5-2-0-0	-3	0	2	0	1	0	1	28	b1/b2/b3/b5/b6/b7/b8/b9/b10/b11/b12/b13/b14/b15/b16/b17/b18/b22/	y1/y3/y4/y5/y6/y8/y10/y11/y12/y17/	2569.9	3671.79	6018	6	6241.69	1	1	1
1	17097	SunS_13_OVCAR3_HILIC_IntactGlycopeptide_F1.17097.17097.5.0.dta	6022.57	5	64.53	RPTGEVYDIEIDTLETTCHVLDPTPLANCSVR	N4H5F1S2	5-4-2-1-0	-4	0	1	0	0	0	1	17	b2/b5/b6/b7/b8/b9/b10/b11/b12/b15/b22/	y1/y3/y4/y10/y12/y17/	2350.83	3671.74	8767	5	6023.61	0	1	0
1	17117	SunS_13_OVCAR3_HILIC_IntactGlycopeptide_F1.17117.17117.4.0.dta	6535.82	4	64.58	RPTGEVYDIEIDTLETTCHVLDPTPLANCSVR	N7H8F1S0	8-7-0-1-0	-1	0	1	0	0	0	1	14	b2/b7/b8/b9/b10/b11/b12/b15/b22/	y1/y3/y4/y10/y17/	2864.04	3671.78	#N/A	2	3266.89	0	1	0
1	17122	SunS_13_OVCAR3_HILIC_IntactGlycopeptide_F1.17122.17122.6.0.dta	6022.59	6	64.59	RPTGEVYDIEIDTLETTCHVLDPTPLANCSVR	N4H5F1S2	5-4-2-1-0	-3	0	1	0	0	0	1	18	b2/b5/b6/b7/b8/b9/b10/b11/b12/b13/b15/b22/	y1/y3/y4/y8/y10/y12/	2350.83	3671.76	#N/A	3	3012.3	0	1	0
1	17125	SunS_13_OVCAR3_HILIC_IntactGlycopeptide_F1.17125.17125.7.0.dta	6241.68	7	64.6	RPTGEVYDIEIDTLETTCHVLDPTPLANCSVR	N5H6F0S2	6-5-2-0-0	-3	0	1	0	0	0	1	23	b1/b2/b3/b5/b6/b7/b8/b9/b10/b11/b12/b13/b14/b15/b18/b22/	y1/y3/y4/y6/y8/y10/y12/	2569.9	3671.77	12965	7	6244.68	0	1	0
1	17174	SunS_13_OVCAR3_HILIC_IntactGlycopeptide_F1.17174.17174.6.0.dta	5876.53	6	64.71	RPTGEVYDIEIDTLETTCHVLDPTPLANCSVR	N4H5F0S2	5-4-2-0-0	-3	0	1	0	0	0	1	23	b1/b2/b5/b6/b7/b8/b9/b10/b11/b12/b13/b14/b15/b18/b22/	y1/y3/y4/y8/y10/y11/y12/y17/	2204.77	3671.76	5870	6	5876.55	1	1	1
1	17175	SunS_13_OVCAR3_HILIC_IntactGlycopeptide_F1.17175.17175.5.0.dta	5876.53	5	64.71	RPTGEVYDIEIDTLETTCHVLDPTPLANCSVR	N4H5F0S2	5-4-2-0-0	-2	0	2	0	1	0	1	22	b2/b5/b6/b7/b8/b9/b10/b11/b12/b13/b14/b15/b16/b17/b18/b22/	y1/y3/y4/y8/y10/y17/	2204.77	3671.76	12667	5	5877.55	0	1	0
1	17188	SunS_13_OVCAR3_HILIC_IntactGlycopeptide_F1.17188.17188.5.0.dta	6241.66	5	64.74	RPTGEVYDIEIDTLETTCHVLDPTPLANCSVR	N5H6F0S2	6-5-2-0-0	-3	0	2	0	1	0	1	22	b2/b4/b5/b6/b7/b8/b9/b10/b11/b12/b13/b14/b15/b17/b18/b22/	y1/y3/y4/y8/y10/y17/	2569.9	3671.75	#N/A	5	6242.69	0	1	0
1	17191	SunS_13_OVCAR3_HILIC_IntactGlycopeptide_F1.17191.17191.4.0.dta	5876.55	4	64.75	RPTGEVYDIEIDTLETTCHVLDPTPLANCSVR	N4H5F0S2	5-4-2-0-0	-4	0	2	0	1	0	1	22	b2/b5/b6/b7/b8/b9/b10/b11/b12/b13/b14/b15/b16/b17/b18/b22/	y1/y3/y4/y10/y17/y20/	2204.77	3671.78	#N/A	2	2938.78	0	1	0
1	17209	SunS_13_OVCAR3_HILIC_IntactGlycopeptide_F1.17209.17209.6.0.dta	6241.69	6	64.79	RPTGEVYDIEIDTLETTCHVLDPTPLANCSVR	N5H6F0S2	6-5-2-0-0	-3	0	2	0	1	0	1	29	b1/b2/b3/b4/b5/b6/b7/b8/b9/b10/b11/b12/b13/b14/b15/b16/b17/b18/b22/	y1/y3/y4/y5/y6/y8/y10/y11/y12/y17/	2569.9	3671.78	6130	6	6241.69	1	1	1
1	17251	SunS_13_OVCAR3_HILIC_IntactGlycopeptide_F1.17251.17251.7.0.dta	6241.66	7	64.87	RPTGEVYDIEIDTLETTCHVLDPTPLANCSVR	N5H6F0S2	6-5-2-0-0	-3	0	1	0	0	0	1	24	b1/b2/b5/b6/b7/b8/b9/b10/b11/b12/b13/b14/b15/b18/b22/	y1/y3/y4/y5/y6/y8/y10/y11/y12/	2569.9	3671.76	12302	7	6244.68	0	1	0
1	17260	SunS_13_OVCAR3_HILIC_IntactGlycopeptide_F1.17260.17260.5.0.dta	6022.58	5	64.89	RPTGEVYDIEIDTLETTCHVLDPTPLANCSVR	N4H5F1S2	5-4-2-1-0	-3	0	2	0	1	0	1	21	b2/b5/b6/b7/b8/b9/b10/b11/b12/b13/b14/b15/b16/b18/b22/	y1/y3/y4/y10/y12/y17/	2350.83	3671.75	11782	5	6023.6	0	1	0
1	17268	SunS_13_OVCAR3_HILIC_IntactGlycopeptide_F1.17268.17268.6.0.dta	6022.59	6	64.91	RPTGEVYDIEIDTLETTCHVLDPTPLANCSVR	N4H5F1S2	5-4-2-1-0	-3	0	2	0	1	0	1	20	b1/b2/b5/b6/b7/b8/b9/b10/b11/b12/b13/b14/b15/b22/	y1/y3/y4/y8/y10/y12/	2350.83	3671.76	11441	6	6023.6	0	1	0
1	17293	SunS_13_OVCAR3_HILIC_IntactGlycopeptide_F1.17293.17293.5.0.dta	5876.54	5	64.97	RPTGEVYDIEIDTLETTCHVLDPTPLANCSVR	N4H5F0S2	5-4-2-0-0	-3	0	2	0	1	0	1	21	b2/b4/b5/b6/b7/b8/b9/b10/b11/b12/b13/b14/b15/b17/b18/b22/	y1/y3/y4/y10/y17/	2204.77	3671.76	6894	5	5877.55	0	1	0
1	17294	SunS_13_OVCAR3_HILIC_IntactGlycopeptide_F1.17294.17294.6.0.dta	5876.54	6	64.97	RPTGEVYDIEIDTLETTCHVLDPTPLANCSVR	N4H5F0S2	5-4-2-0-0	-3	0	1	0	0	0	1	25	b1/b2/b3/b5/b6/b7/b8/b9/b10/b11/b12/b13/b14/b15/b16/b17/b18/b22/	y1/y3/y4/y8/y10/y11/y12/	2204.77	3671.77	5957	6	5876.55	1	1	1
1	17303	SunS_13_OVCAR3_HILIC_IntactGlycopeptide_F1.17303.17303.5.0.dta	6539.81	5	64.99	FPIVNAELSFFGHAHLGTGDPYTPGFPSFNHTQFPPSR	N6H7F0S0	7-6-0-0-0	-3	0	1	0	1	0	0	6	b12/b17/b18/	y1/y11/y12/	2352.85	4186.96	#N/A	5	6539.79	1	0	0
1	17307	SunS_13_OVCAR3_HILIC_IntactGlycopeptide_F1.17307.17307.4.0.dta	6022.6	4	65	RPTGEVYDIEIDTLETTCHVLDPTPLANCSVR	N4H5F1S2	5-4-2-1-0	-2	0	2	0	1	0	1	18	b2/b5/b6/b8/b9/b10/b11/b12/b14/b15/b18/b22/	y1/y3/y4/y10/y17/y20/	2350.83	3671.77	5669	4	6022.6	1	1	1
1	17314	SunS_13_OVCAR3_HILIC_IntactGlycopeptide_F1.17314.17314.5.0.dta	6241.65	5	65.02	RPTGEVYDIEIDTLETTCHVLDPTPLANCSVR	N5H6F0S2	6-5-2-0-0	-3	0	2	0	1	0	1	26	b2/b3/b4/b5/b6/b7/b8/b9/b10/b11/b12/b13/b14/b15/b16/b17/b18/b22/	y1/y3/y4/y10/y11/y12/y17/y20/	2569.9	3671.74	13701	5	6242.68	0	1	0
1	17316	SunS_13_OVCAR3_HILIC_IntactGlycopeptide_F1.17316.17316.4.0.dta	5876.54	4	65.02	RPTGEVYDIEIDTLETTCHVLDPTPLANCSVR	N4H5F0S2	5-4-2-0-0	0	0	2	0	1	0	1	25	b1/b2/b5/b6/b7/b8/b9/b10/b11/b12/b13/b14/b15/b16/b17/b18/b22/	y1/y3/y4/y8/y10/y11/y17/y20/	2204.77	3671.77	6082	4	5876.55	1	1	1
1	17327	SunS_13_OVCAR3_HILIC_IntactGlycopeptide_F1.17327.17327.4.0.dta	6154.66	4	65.05	RPTGEVYDIEIDTLETTCHVLDPTPLANCSVR	N6H6F2S0	6-6-0-2-0	-1	0	1	0	0	0	1	14	b2/b5/b7/b8/b9/b10/b11/b12/b15/b16/b22/	y1/y3/y12/	2482.91	3671.75	#N/A	2	3076.33	0	1	0
1	17335	SunS_13_OVCAR3_HILIC_IntactGlycopeptide_F1.17335.17335.4.0.dta	6241.67	4	65.07	RPTGEVYDIEIDTLETTCHVLDPTPLANCSVR	N5H6F0S2	6-5-2-0-0	-3	0	2	0	1	0	1	23	b1/b2/b5/b6/b7/b8/b9/b10/b11/b12/b13/b14/b15/b17/b18/b22/	y1/y3/y4/y10/y11/y17/y20/	2569.9	3671.77	4928	4	6241.67	1	1	1
1	17336	SunS_13_OVCAR3_HILIC_IntactGlycopeptide_F1.17336.17336.6.0.dta	6241.66	6	65.07	RPTGEVYDIEIDTLETTCHVLDPTPLANCSVR	N5H6F0S2	6-5-2-0-0	-3	0	2	0	1	0	1	27	b1/b2/b3/b5/b6/b7/b8/b9/b10/b11/b12/b13/b14/b15/b16/b17/b18/b22/	y1/y3/y4/y5/y8/y10/y11/y12/y17/	2569.9	3671.76	6193	6	6241.69	1	1	1
1	17396	SunS_13_OVCAR3_HILIC_IntactGlycopeptide_F1.17396.17396.5.0.dta	5876.56	5	65.23	RPTGEVYDIEIDTLETTCHVLDPTPLANCSVR	N4H5F0S2	5-4-2-0-0	-2	0	2	0	1	0	1	20	b2/b3/b5/b6/b7/b8/b9/b10/b11/b12/b13/b14/b15/b22/	y1/y3/y4/y8/y10/y17/	2204.77	3671.78	6499	5	5877.57	0	1	0
1	17398	SunS_13_OVCAR3_HILIC_IntactGlycopeptide_F1.17398.17398.6.0.dta	5876.54	6	65.24	RPTGEVYDIEIDTLETTCHVLDPTPLANCSVR	N4H5F0S2	5-4-2-0-0	-3	0	1	0	0	0	1	18	b2/b5/b6/b7/b8/b9/b10/b11/b12/b13/b14/b15/	y1/y3/y4/y8/y10/y12/	2204.77	3671.77	4968	6	5876.56	1	1	1
1	17405	SunS_13_OVCAR3_HILIC_IntactGlycopeptide_F1.17405.17405.5.0.dta	6241.66	5	65.27	RPTGEVYDIEIDTLETTCHVLDPTPLANCSVR	N5H6F0S2	6-5-2-0-0	-3	0	2	0	1	0	1	17	b2/b5/b6/b7/b8/b9/b10/b11/b12/b14/b15/b22/	y1/y3/y4/y10/y17/	2569.9	3671.76	#N/A	5	6242.69	0	1	0
1	17407	SunS_13_OVCAR3_HILIC_IntactGlycopeptide_F1.17407.17407.4.0.dta	5876.53	4	65.28	RPTGEVYDIEIDTLETTCHVLDPTPLANCSVR	N4H5F0S2	5-4-2-0-0	-3	0	2	0	1	0	1	19	b2/b5/b7/b8/b9/b10/b11/b12/b13/b14/b15/b18/b22/	y1/y3/y4/y10/y17/y20/	2204.77	3671.76	6520	4	5876.55	1	1	1
1	17416	SunS_13_OVCAR3_HILIC_IntactGlycopeptide_F1.17416.17416.6.0.dta	6241.67	6	65.33	RPTGEVYDIEIDTLETTCHVLDPTPLANCSVR	N5H6F0S2	6-5-2-0-0	-4	0	2	0	1	0	1	12	b2/b5/b6/b8/b9/b10/b11/b12/b14/	y1/y10/y17/	2569.9	3671.77	#N/A	6	6242.69	0	1	0
1	17446	SunS_13_OVCAR3_HILIC_IntactGlycopeptide_F1.17446.17446.5.0.dta	5876.52	5	65.49	RPTGEVYDIEIDTLETTCHVLDPTPLANCSVR	N4H5F0S2	5-4-2-0-0	0	0	1	0	0	0	1	11	b2/b8/b9/b10/b11/b12/b15/b22/	y1/y4/y17/	2204.77	3671.74	8444	5	5877.56	0	1	0
1	17812	SunS_13_OVCAR3_HILIC_IntactGlycopeptide_F1.17812.17812.4.0.dta	4311.81	4	67.82	GLGFNLTELAEAEIHK	N5H6F0S2	6-5-2-0-0	-2	0	4	1	1	1	1	11	b2/	y2/y3/y4/y5/y6/y7/y8/y9/y10/y11/	2569.9	1741.91	2529	4	4311.83	1	1	1
1	17856	SunS_13_OVCAR3_HILIC_IntactGlycopeptide_F1.17856.17856.3.0.dta	4311.83	3	68.03	GLGFNLTELAEAEIHK	N5H6F0S2	6-5-2-0-0	-2	0	4	1	1	1	1	7		y2/y5/y6/y7/y8/y9/y10/	2569.9	1741.92	4450	3	4311.82	1	1	1
1	17863	SunS_13_OVCAR3_HILIC_IntactGlycopeptide_F1.17863.17863.4.0.dta	4311.82	4	68.08	GLGFNLTELAEAEIHK	N5H6F0S2	6-5-2-0-0	-2	0	4	1	1	1	1	18	b5/b6/b7/b10/b12/b13/	y1/y2/y3/y4/y5/y6/y7/y8/y9/y10/y11/y14/	2569.9	1741.92	3497	4	4311.83	1	1	1
1	17902	SunS_13_OVCAR3_HILIC_IntactGlycopeptide_F1.17902.17902.3.0.dta	4311.82	3	68.29	GLGFNLTELAEAEIHK	N5H6F0S2	6-5-2-0-0	0	0	4	1	1	1	1	9		y2/y4/y5/y6/y7/y8/y9/y10/y11/	2569.9	1741.91	2397	3	4311.82	1	1	1
1	17909	SunS_13_OVCAR3_HILIC_IntactGlycopeptide_F1.17909.17909.4.0.dta	4311.81	4	68.33	GLGFNLTELAEAEIHK	N5H6F0S2	6-5-2-0-0	-2	0	4	1	1	1	1	16	b2/b3/b6/b8/	y1/y2/y3/y4/y5/y6/y7/y8/y9/y10/y11/y14/	2569.9	1741.91	2109	4	4311.83	1	1	1
1	17947	SunS_13_OVCAR3_HILIC_IntactGlycopeptide_F1.17947.17947.3.0.dta	4311.82	3	68.55	GLGFNLTELAEAEIHK	N5H6F0S2	6-5-2-0-0	-2	0	4	1	1	1	1	8		y2/y5/y6/y7/y8/y9/y10/y11/	2569.9	1741.92	5046	3	4311.82	1	1	1
1	17995	SunS_13_OVCAR3_HILIC_IntactGlycopeptide_F1.17995.17995.3.0.dta	4311.82	3	68.82	GLGFNLTELAEAEIHK	N5H6F0S2	6-5-2-0-0	-2	0	4	1	1	1	1	7		y2/y3/y5/y6/y7/y8/y10/	2569.9	1741.92	2238	3	4311.82	1	1	1
1	18117	SunS_13_OVCAR3_HILIC_IntactGlycopeptide_F1.18117.18117.5.0.dta	6532.78	5	69.51	RPTGEVYDIEIDTLETTCHVLDPTPLANCSVR	N5H6F0S3	6-5-3-0-0	-4	0	1	0	0	0	1	6	b2/b8/b11/b12/b22/	y1/	2861	3671.78	#N/A	5	6533.78	0	1	0
1	18163	SunS_13_OVCAR3_HILIC_IntactGlycopeptide_F1.18163.18163.5.0.dta	6532.76	5	69.77	RPTGEVYDIEIDTLETTCHVLDPTPLANCSVR	N5H6F0S3	6-5-3-0-0	-2	0	1	0	0	0	1	7	b2/b8/b9/b10/b11/b22/	y1/	2861	3671.76	#N/A	5	6533.79	0	1	0
1	18213	SunS_13_OVCAR3_HILIC_IntactGlycopeptide_F1.18213.18213.6.0.dta	6532.75	6	70.01	RPTGEVYDIEIDTLETTCHVLDPTPLANCSVR	N5H6F0S3	6-5-3-0-0	-4	0	1	0	0	0	1	19	b2/b5/b6/b7/b8/b9/b10/b11/b12/b13/b14/b15/b18/b22/	y1/y3/y4/y10/y17/	2861	3671.75	#N/A	2	2178.6	0	1	0
1	18217	SunS_13_OVCAR3_HILIC_IntactGlycopeptide_F1.18217.18217.5.0.dta	6532.79	5	70.02	RPTGEVYDIEIDTLETTCHVLDPTPLANCSVR	N5H6F0S3	6-5-3-0-0	-3	0	2	0	1	0	1	19	b2/b5/b6/b7/b8/b9/b10/b11/b12/b13/b14/b15/b18/b22/	y1/y3/y4/y10/y17/	2861	3671.79	#N/A	5	6533.79	0	1	0
1	18222	SunS_13_OVCAR3_HILIC_IntactGlycopeptide_F1.18222.18222.4.0.dta	6532.75	4	70.04	RPTGEVYDIEIDTLETTCHVLDPTPLANCSVR	N5H6F0S3	6-5-3-0-0	-3	0	1	0	0	0	1	11	b2/b8/b10/b11/b12/b13/b22/	y1/y4/y10/y17/	2861	3671.75	7887	4	6532.78	1	1	1
1	18225	SunS_13_OVCAR3_HILIC_IntactGlycopeptide_F1.18225.18225.7.0.dta	6532.78	7	70.05	RPTGEVYDIEIDTLETTCHVLDPTPLANCSVR	N5H6F0S3	6-5-3-0-0	-4	0	1	0	0	0	1	10	b2/b6/b8/b9/b10/b11/b12/	y1/y8/y10/	2861	3671.78	13777	7	6536.79	0	1	0
1	18258	SunS_13_OVCAR3_HILIC_IntactGlycopeptide_F1.18258.18258.6.0.dta	6532.76	6	70.27	RPTGEVYDIEIDTLETTCHVLDPTPLANCSVR	N5H6F0S3	6-5-3-0-0	-3	0	1	0	0	0	1	15	b2/b5/b7/b8/b9/b10/b11/b12/b14/b22/	y1/y3/y4/y8/y10/	2861	3671.76	#N/A	6	6532.79	1	1	1
1	18260	SunS_13_OVCAR3_HILIC_IntactGlycopeptide_F1.18260.18260.5.0.dta	6532.78	5	70.28	RPTGEVYDIEIDTLETTCHVLDPTPLANCSVR	N5H6F0S3	6-5-3-0-0	-3	0	2	0	1	0	1	19	b2/b5/b6/b7/b8/b9/b10/b11/b12/b13/b14/b15/b22/	y1/y3/y4/y10/y17/y20/	2861	3671.78	#N/A	5	6533.79	0	1	0
1	18267	SunS_13_OVCAR3_HILIC_IntactGlycopeptide_F1.18267.18267.7.0.dta	6532.79	7	70.3	RPTGEVYDIEIDTLETTCHVLDPTPLANCSVR	N5H6F0S3	6-5-3-0-0	-3	0	1	0	0	0	1	9	b2/b6/b8/b9/b10/b11/b12/b15/	y1/	2861	3671.79	5991	7	6535.81	0	1	0
1	18308	SunS_13_OVCAR3_HILIC_IntactGlycopeptide_F1.18308.18308.6.0.dta	6532.76	6	70.53	RPTGEVYDIEIDTLETTCHVLDPTPLANCSVR	N5H6F0S3	6-5-3-0-0	-3	0	1	0	0	0	1	19	b1/b2/b5/b6/b7/b8/b9/b10/b11/b12/b14/b15/b18/b22/	y1/y3/y4/y10/y17/	2861	3671.76	#N/A	6	6532.79	1	1	1
1	18310	SunS_13_OVCAR3_HILIC_IntactGlycopeptide_F1.18310.18310.5.0.dta	6532.76	5	70.54	RPTGEVYDIEIDTLETTCHVLDPTPLANCSVR	N5H6F0S3	6-5-3-0-0	-3	0	1	0	0	0	1	14	b2/b5/b8/b9/b10/b11/b12/b15/b22/	y1/y3/y4/y8/y17/	2861	3671.76	#N/A	5	6533.79	0	1	0
1	18705	SunS_13_OVCAR3_HILIC_IntactGlycopeptide_F1.18705.18705.4.0.dta	4601.85	4	72.77	LCPDCPLLAPLNDSR	N5H6F0S3	6-5-3-0-0	-2	0	3	1	0	1	1	10	b2/b3/b4/b5/b7/b8/b9/	y2/y3/y6/	2861	1740.85	#N/A	4	4601.85	1	1	1
1	18921	SunS_13_OVCAR3_HILIC_IntactGlycopeptide_F1.18921.18921.4.0.dta	4601.86	4	73.96	LCPDCPLLAPLNDSR	N5H6F0S3	6-5-3-0-0	-2	0	4	1	1	1	1	17	b2/b3/b4/b5/b6/b7/b8/b9/	y1/y2/y3/y6/y7/y8/y10/y11/y13/	2861	1740.86	9973	4	4601.86	1	1	1
1	18942	SunS_13_OVCAR3_HILIC_IntactGlycopeptide_F1.18942.18942.3.0.dta	4601.83	3	74.09	LCPDCPLLAPLNDSR	N5H6F0S3	6-5-3-0-0	0	0	4	1	1	1	1	9	b2/b4/b5/b7/b8/b9/	y2/y3/y6/	2861	1740.83	6143	3	4601.85	1	1	1
1	18965	SunS_13_OVCAR3_HILIC_IntactGlycopeptide_F1.18965.18965.4.0.dta	4601.85	4	74.22	LCPDCPLLAPLNDSR	N5H6F0S3	6-5-3-0-0	-2	0	4	1	1	1	1	15	b2/b3/b5/b6/b7/b8/b9/	y1/y2/y3/y6/y7/y10/y11/y13/	2861	1740.85	5239	4	4601.86	1	1	1
1	19011	SunS_13_OVCAR3_HILIC_IntactGlycopeptide_F1.19011.19011.4.0.dta	4601.84	4	74.48	LCPDCPLLAPLNDSR	N5H6F0S3	6-5-3-0-0	-2	0	3	1	0	1	1	12	b2/b3/b4/b5/b7/b8/b9/	y2/y3/y6/y7/y13/	2861	1740.84	9366	4	4601.86	1	1	1
1	19018	SunS_13_OVCAR3_HILIC_IntactGlycopeptide_F1.19018.19018.4.0.dta	4311.84	4	74.52	GLGFNLTELAEAEIHK	N5H6F0S2	6-5-2-0-0	-2	0	4	1	1	1	1	7	b14/	y2/y3/y5/y7/y8/y10/	2569.9	1741.93	6387	4	4311.82	1	1	1
1	19061	SunS_13_OVCAR3_HILIC_IntactGlycopeptide_F1.19061.19061.4.0.dta	4311.81	4	74.77	GLGFNLTELAEAEIHK	N5H6F0S2	6-5-2-0-0	-2	0	4	1	1	1	1	6		y3/y5/y6/y7/y8/y10/	2569.9	1741.9	4473	4	4311.82	1	1	1
1	19101	SunS_13_OVCAR3_HILIC_IntactGlycopeptide_F1.19101.19101.4.0.dta	4601.85	4	75	LCPDCPLLAPLNDSR	N5H6F0S3	6-5-3-0-0	0	0	4	1	1	1	1	6	b2/b5/b7/b8/b9/	y2/	2861	1740.85	#N/A	4	4601.85	1	1	1
1	19107	SunS_13_OVCAR3_HILIC_IntactGlycopeptide_F1.19107.19107.4.0.dta	4311.81	4	75.03	GLGFNLTELAEAEIHK	N5H6F0S2	6-5-2-0-0	-1	0	4	1	1	1	1	7		y2/y5/y6/y7/y8/y9/y10/	2569.9	1741.91	5556	4	4311.82	1	1	1
1	19152	SunS_13_OVCAR3_HILIC_IntactGlycopeptide_F1.19152.19152.4.0.dta	4601.87	4	75.25	LCPDCPLLAPLNDSR	N5H6F0S3	6-5-3-0-0	0	0	4	1	1	1	1	13	b3/b5/b6/b7/b8/b9/	y1/y2/y3/y6/y7/y11/y13/	2861	1740.87	#N/A	4	4601.87	1	1	1
1	19171	SunS_13_OVCAR3_HILIC_IntactGlycopeptide_F1.19171.19171.3.0.dta	4601.85	3	75.35	LCPDCPLLAPLNDSR	N5H6F0S3	6-5-3-0-0	-3	0	4	1	1	1	1	9	b3/b5/b6/b7/b8/b9/	y2/y3/y11/	2861	1740.85	#N/A	3	4601.84	1	1	1
1	19202	SunS_13_OVCAR3_HILIC_IntactGlycopeptide_F1.19202.19202.4.0.dta	4601.86	4	75.51	LCPDCPLLAPLNDSR	N5H6F0S3	6-5-3-0-0	0	0	4	1	1	1	1	13	b3/b5/b6/b7/b8/b9/	y1/y2/y3/y6/y7/y11/y13/	2861	1740.86	10216	4	4601.87	1	1	1
1	19209	SunS_13_OVCAR3_HILIC_IntactGlycopeptide_F1.19209.19209.4.0.dta	4311.81	4	75.54	GLGFNLTELAEAEIHK	N5H6F0S2	6-5-2-0-0	-2	0	4	1	1	1	1	7		y2/y6/y7/y8/y9/y10/y11/	2569.9	1741.91	5270	4	4311.82	1	1	1
1	19222	SunS_13_OVCAR3_HILIC_IntactGlycopeptide_F1.19222.19222.3.0.dta	4601.82	3	75.61	LCPDCPLLAPLNDSR	N5H6F0S3	6-5-3-0-0	0	0	4	1	1	1	1	6	b2/b5/b8/b9/	y1/y2/	2861	1740.82	#N/A	3	4601.85	1	1	1
1	19250	SunS_13_OVCAR3_HILIC_IntactGlycopeptide_F1.19250.19250.4.0.dta	4601.86	4	75.76	LCPDCPLLAPLNDSR	N5H6F0S3	6-5-3-0-0	0	0	4	1	1	1	1	12	b3/b5/b6/b7/b8/b9/	y1/y2/y3/y6/y7/y13/	2861	1740.86	10097	4	4601.86	1	1	1
1	19257	SunS_13_OVCAR3_HILIC_IntactGlycopeptide_F1.19257.19257.4.0.dta	4311.81	4	75.8	GLGFNLTELAEAEIHK	N5H6F0S2	6-5-2-0-0	-2	0	4	1	1	1	1	10	b6/b10/	y2/y4/y6/y7/y8/y9/y10/y11/	2569.9	1741.91	6072	4	4311.82	1	1	1
1	19298	SunS_13_OVCAR3_HILIC_IntactGlycopeptide_F1.19298.19298.4.0.dta	4601.88	4	76.02	LCPDCPLLAPLNDSR	N5H6F0S3	6-5-3-0-0	-3	0	3	0	1	1	1	6	b5/b7/b8/b9/	y2/y3/	2861	1740.88	#N/A	2	2301.95	0	1	0
1	19305	SunS_13_OVCAR3_HILIC_IntactGlycopeptide_F1.19305.19305.4.0.dta	4311.81	4	76.06	GLGFNLTELAEAEIHK	N5H6F0S2	6-5-2-0-0	-2	0	4	1	1	1	1	8		y2/y5/y6/y7/y8/y9/y10/y11/	2569.9	1741.91	4144	4	4311.82	1	1	1
1	19351	SunS_13_OVCAR3_HILIC_IntactGlycopeptide_F1.19351.19351.4.0.dta	4602.93	4	76.27	GLGFNLTELAEAEIHK	N5H6F0S3	6-5-3-0-0	-2	0	4	1	1	1	1	27	b2/b3/b4/b5/b6/b7/b8/b9/b10/b11/b12/b13/b14/b15/	y1/y2/y3/y4/y5/y6/y7/y8/y9/y10/y11/y12/y14/	2861	1741.93	4509	4	4602.93	1	1	1
1	19360	SunS_13_OVCAR3_HILIC_IntactGlycopeptide_F1.19360.19360.4.0.dta	4311.82	4	76.31	GLGFNLTELAEAEIHK	N5H6F0S2	6-5-2-0-0	-2	0	4	1	1	1	1	8		y2/y4/y5/y6/y7/y8/y9/y10/	2569.9	1741.91	3833	4	4311.82	1	1	1
1	19376	SunS_13_OVCAR3_HILIC_IntactGlycopeptide_F1.19376.19376.3.0.dta	4602.9	3	76.37	GLGFNLTELAEAEIHK	N5H6F0S3	6-5-3-0-0	-2	0	4	1	1	1	1	17	b2/b3/b5/b6/b14/	y1/y2/y3/y4/y5/y6/y7/y8/y9/y10/y11/y12/	2861	1741.9	2777	3	4602.92	1	1	1
1	19385	SunS_13_OVCAR3_HILIC_IntactGlycopeptide_F1.19385.19385.5.0.dta	4602.93	5	76.41	GLGFNLTELAEAEIHK	N5H6F0S3	6-5-3-0-0	-2	0	4	1	1	1	1	22	b3/b6/b7/b8/b9/b11/b12/b13/b14/	y1/y2/y3/y4/y5/y6/y7/y8/y9/y10/y11/y12/y14/	2861	1741.93	#N/A	5	4602.92	1	1	1
1	19412	SunS_13_OVCAR3_HILIC_IntactGlycopeptide_F1.19412.19412.4.0.dta	4602.91	4	76.53	GLGFNLTELAEAEIHK	N5H6F0S3	6-5-3-0-0	-2	0	4	1	1	1	1	25	b2/b3/b4/b5/b6/b7/b8/b9/b10/b11/b12/b15/	y1/y2/y3/y4/y5/y6/y7/y8/y9/y10/y11/y12/y14/	2861	1741.91	4354	4	4602.94	1	1	1
1	19423	SunS_13_OVCAR3_HILIC_IntactGlycopeptide_F1.19423.19423.4.0.dta	4311.82	4	76.57	GLGFNLTELAEAEIHK	N5H6F0S2	6-5-2-0-0	-1	0	4	1	1	1	1	9	b14/	y2/y3/y4/y5/y6/y7/y8/y10/	2569.9	1741.91	4977	4	4311.82	1	1	1
1	19439	SunS_13_OVCAR3_HILIC_IntactGlycopeptide_F1.19439.19439.3.0.dta	4602.91	3	76.64	GLGFNLTELAEAEIHK	N5H6F0S3	6-5-3-0-0	-2	0	4	1	1	1	1	12	b3/b6/	y2/y3/y4/y5/y6/y7/y8/y9/y10/y11/	2861	1741.91	1978	3	4602.92	1	1	1
1	19452	SunS_13_OVCAR3_HILIC_IntactGlycopeptide_F1.19452.19452.4.0.dta	4968.04	4	76.71	GLGFNLTELAEAEIHK	N6H7F0S3	7-6-3-0-0	-2	0	4	1	1	1	1	7		y2/y5/y6/y7/y8/y9/y10/	3226.13	1741.91	#N/A	4	4968.05	1	1	1
1	19476	SunS_13_OVCAR3_HILIC_IntactGlycopeptide_F1.19476.19476.4.0.dta	4602.93	4	76.79	GLGFNLTELAEAEIHK	N5H6F0S3	6-5-3-0-0	-2	0	4	1	1	1	1	26	b2/b3/b4/b5/b6/b7/b8/b9/b10/b11/b12/b13/b15/	y1/y2/y3/y4/y5/y6/y7/y8/y9/y10/y11/y12/y14/	2861	1741.93	#N/A	4	4602.95	1	1	1
1	19491	SunS_13_OVCAR3_HILIC_IntactGlycopeptide_F1.19491.19491.4.0.dta	4311.81	4	76.83	GLGFNLTELAEAEIHK	N5H6F0S2	6-5-2-0-0	-2	0	4	1	1	1	1	9		y2/y4/y5/y6/y7/y8/y9/y10/y11/	2569.9	1741.91	#N/A	4	4311.82	1	1	1
1	19542	SunS_13_OVCAR3_HILIC_IntactGlycopeptide_F1.19542.19542.5.0.dta	4602.9	5	76.96	GLGFNLTELAEAEIHK	N5H6F0S3	6-5-3-0-0	-2	0	4	1	1	1	1	23	b2/b3/b4/b5/b6/b7/b8/b9/b10/b11/	y1/y2/y3/y4/y5/y6/y7/y8/y9/y10/y11/y12/y14/	2861	1741.9	#N/A	5	4602.92	1	1	1
1	19575	SunS_13_OVCAR3_HILIC_IntactGlycopeptide_F1.19575.19575.4.0.dta	4602.93	4	77.05	GLGFNLTELAEAEIHK	N5H6F0S3	6-5-3-0-0	-2	0	4	1	1	1	1	27	b2/b3/b4/b5/b6/b7/b8/b9/b10/b11/b12/b13/b14/b15/	y1/y2/y3/y4/y5/y6/y7/y8/y9/y10/y11/y12/y14/	2861	1741.93	4434	4	4602.95	1	1	1
1	19591	SunS_13_OVCAR3_HILIC_IntactGlycopeptide_F1.19591.19591.4.0.dta	4311.81	4	77.09	GLGFNLTELAEAEIHK	N5H6F0S2	6-5-2-0-0	-1	0	4	1	1	1	1	8		y2/y5/y6/y7/y8/y9/y10/y11/	2569.9	1741.91	3985	4	4311.81	1	1	1
1	19637	SunS_13_OVCAR3_HILIC_IntactGlycopeptide_F1.19637.19637.5.0.dta	4602.92	5	77.21	GLGFNLTELAEAEIHK	N5H6F0S3	6-5-3-0-0	-2	0	4	1	1	1	1	23	b2/b3/b5/b6/b7/b9/b10/b11/b12/b13/	y1/y2/y3/y4/y5/y6/y7/y8/y9/y10/y11/y12/y14/	2861	1741.92	4646	5	4602.93	1	1	1
1	19666	SunS_13_OVCAR3_HILIC_IntactGlycopeptide_F1.19666.19666.4.0.dta	4602.93	4	77.3	GLGFNLTELAEAEIHK	N5H6F0S3	6-5-3-0-0	-2	0	4	1	1	1	1	25	b2/b3/b4/b5/b6/b7/b8/b9/b10/b11/b12/b15/	y1/y2/y3/y4/y5/y6/y7/y8/y9/y10/y11/y12/y14/	2861	1741.93	4272	4	4602.96	1	1	1
1	19683	SunS_13_OVCAR3_HILIC_IntactGlycopeptide_F1.19683.19683.4.0.dta	4311.83	4	77.35	GLGFNLTELAEAEIHK	N5H6F0S2	6-5-2-0-0	-1	0	4	1	1	1	1	7	b6/	y4/y5/y7/y8/y9/y10/	2569.9	1741.92	6122	4	4311.82	1	1	1
1	19722	SunS_13_OVCAR3_HILIC_IntactGlycopeptide_F1.19722.19722.5.0.dta	4602.92	5	77.47	GLGFNLTELAEAEIHK	N5H6F0S3	6-5-3-0-0	-2	0	4	1	1	1	1	25	b3/b4/b5/b6/b7/b8/b9/b10/b12/b13/b14/b15/	y1/y2/y3/y4/y5/y6/y7/y8/y9/y10/y11/y12/y14/	2861	1741.92	3467	5	4602.92	1	1	1
1	19742	SunS_13_OVCAR3_HILIC_IntactGlycopeptide_F1.19742.19742.4.0.dta	4665.88	4	77.53	ACVAGFTNITFHPQNK	N5H6F0S3	6-5-3-0-0	-3	0	3	1	1	0	1	6	b2/b7/b8/b9/	y1/y7/	2861	1804.88	#N/A	4	4666.87	0	1	0
1	19751	SunS_13_OVCAR3_HILIC_IntactGlycopeptide_F1.19751.19751.4.0.dta	4602.93	4	77.55	GLGFNLTELAEAEIHK	N5H6F0S3	6-5-3-0-0	-2	0	4	1	1	1	1	27	b2/b3/b4/b5/b6/b7/b8/b9/b10/b11/b12/b13/b14/b15/	y1/y2/y3/y4/y5/y6/y7/y8/y9/y10/y11/y12/y14/	2861	1741.93	#N/A	4	4602.96	1	1	1
1	19772	SunS_13_OVCAR3_HILIC_IntactGlycopeptide_F1.19772.19772.4.0.dta	4311.82	4	77.61	GLGFNLTELAEAEIHK	N5H6F0S2	6-5-2-0-0	-1	0	4	1	1	1	1	6		y2/y5/y7/y8/y9/y10/	2569.9	1741.91	#N/A	2	2156.92	0	1	0
1	19809	SunS_13_OVCAR3_HILIC_IntactGlycopeptide_F1.19809.19809.5.0.dta	4602.92	5	77.73	GLGFNLTELAEAEIHK	N5H6F0S3	6-5-3-0-0	-2	0	4	1	1	1	1	18	b3/b6/b7/b9/b11/	y1/y2/y3/y4/y5/y6/y7/y8/y9/y10/y11/y12/y14/	2861	1741.92	4852	5	4602.92	1	1	1
1	19823	SunS_13_OVCAR3_HILIC_IntactGlycopeptide_F1.19823.19823.4.0.dta	4602.92	4	77.81	GLGFNLTELAEAEIHK	N5H6F0S3	6-5-3-0-0	-2	0	4	1	1	1	1	26	b2/b3/b4/b5/b6/b7/b8/b9/b10/b11/b12/b13/b14/	y1/y2/y3/y4/y5/y6/y7/y8/y9/y10/y11/y12/y14/	2861	1741.92	#N/A	4	4602.96	1	1	1
1	19853	SunS_13_OVCAR3_HILIC_IntactGlycopeptide_F1.19853.19853.3.0.dta	4602.9	3	77.94	GLGFNLTELAEAEIHK	N5H6F0S3	6-5-3-0-0	-2	0	4	1	1	1	1	16	b3/b5/b6/b9/	y2/y3/y4/y5/y6/y7/y8/y9/y10/y11/y12/y14/	2861	1741.9	3202	3	4602.92	1	1	1
1	19860	SunS_13_OVCAR3_HILIC_IntactGlycopeptide_F1.19860.19860.5.0.dta	4602.92	5	77.99	GLGFNLTELAEAEIHK	N5H6F0S3	6-5-3-0-0	-2	0	4	1	1	1	1	11	b6/	y2/y3/y4/y5/y6/y7/y8/y9/y10/y11/	2861	1741.92	2969	5	4602.92	1	1	1
1	19873	SunS_13_OVCAR3_HILIC_IntactGlycopeptide_F1.19873.19873.4.0.dta	4602.92	4	78.06	GLGFNLTELAEAEIHK	N5H6F0S3	6-5-3-0-0	-2	0	4	1	1	1	1	25	b2/b3/b4/b5/b6/b8/b9/b10/b11/b12/b14/b15/	y1/y2/y3/y4/y5/y6/y7/y8/y9/y10/y11/y12/y14/	2861	1741.92	#N/A	4	4602.95	1	1	1
1	19898	SunS_13_OVCAR3_HILIC_IntactGlycopeptide_F1.19898.19898.3.0.dta	4602.9	3	78.2	GLGFNLTELAEAEIHK	N5H6F0S3	6-5-3-0-0	-2	0	4	1	1	1	1	9		y2/y3/y4/y5/y6/y7/y8/y9/y10/	2861	1741.9	3822	3	4602.91	1	1	1
1	19905	SunS_13_OVCAR3_HILIC_IntactGlycopeptide_F1.19905.19905.5.0.dta	4602.91	5	78.25	GLGFNLTELAEAEIHK	N5H6F0S3	6-5-3-0-0	-2	0	4	1	1	1	1	7		y2/y5/y6/y7/y8/y9/y10/	2861	1741.91	5962	5	4602.93	1	1	1
1	19919	SunS_13_OVCAR3_HILIC_IntactGlycopeptide_F1.19919.19919.4.0.dta	4602.92	4	78.32	GLGFNLTELAEAEIHK	N5H6F0S3	6-5-3-0-0	-2	0	4	1	1	1	1	26	b2/b3/b4/b5/b6/b7/b8/b9/b10/b11/b12/b13/b14/	y1/y2/y3/y4/y5/y6/y7/y8/y9/y10/y11/y12/y14/	2861	1741.92	3364	4	4602.95	1	1	1
1	19944	SunS_13_OVCAR3_HILIC_IntactGlycopeptide_F1.19944.19944.3.0.dta	4602.89	3	78.46	GLGFNLTELAEAEIHK	N5H6F0S3	6-5-3-0-0	-2	0	4	1	1	1	1	11	b6/	y2/y3/y4/y5/y6/y7/y8/y9/y10/y11/	2861	1741.89	4692	3	4602.91	1	1	1
1	19952	SunS_13_OVCAR3_HILIC_IntactGlycopeptide_F1.19952.19952.5.0.dta	4602.91	5	78.51	GLGFNLTELAEAEIHK	N5H6F0S3	6-5-3-0-0	-2	0	4	1	1	1	1	6		y2/y5/y7/y8/y9/y10/	2861	1741.91	4048	5	4602.93	1	1	1
1	19965	SunS_13_OVCAR3_HILIC_IntactGlycopeptide_F1.19965.19965.4.0.dta	4602.91	4	78.58	GLGFNLTELAEAEIHK	N5H6F0S3	6-5-3-0-0	-2	0	4	1	1	1	1	22	b3/b5/b6/b7/b8/b9/b10/b11/b13/	y1/y2/y3/y4/y5/y6/y7/y8/y9/y10/y11/y12/y14/	2861	1741.91	#N/A	4	4602.94	1	1	1
1	19988	SunS_13_OVCAR3_HILIC_IntactGlycopeptide_F1.19988.19988.3.0.dta	4602.93	3	78.72	GLGFNLTELAEAEIHK	N5H6F0S3	6-5-3-0-0	-2	0	4	1	1	1	1	9		y1/y2/y3/y5/y6/y7/y8/y9/y10/	2861	1741.93	3225	3	4602.91	1	1	1
1	20008	SunS_13_OVCAR3_HILIC_IntactGlycopeptide_F1.20008.20008.4.0.dta	4602.94	4	78.83	GLGFNLTELAEAEIHK	N5H6F0S3	6-5-3-0-0	-2	0	4	1	1	1	1	20	b3/b5/b6/b8/b9/b10/b13/	y1/y2/y3/y4/y5/y6/y7/y8/y9/y10/y11/y12/y14/	2861	1741.94	3561	4	4602.94	1	1	1
1	20049	SunS_13_OVCAR3_HILIC_IntactGlycopeptide_F1.20049.20049.4.0.dta	4602.9	4	79.1	GLGFNLTELAEAEIHK	N5H6F0S3	6-5-3-0-0	-2	0	4	1	1	1	1	17	b3/b6/b8/b10/b11/b13/	y1/y2/y3/y4/y5/y6/y7/y8/y9/y10/y11/	2861	1741.9	#N/A	4	4602.93	1	1	1
1	20132	SunS_13_OVCAR3_HILIC_IntactGlycopeptide_F1.20132.20132.4.0.dta	4602.9	4	79.61	GLGFNLTELAEAEIHK	N5H6F0S3	6-5-3-0-0	-2	0	4	1	1	1	1	12	b6/b14/	y2/y3/y4/y5/y6/y7/y8/y9/y10/y11/	2861	1741.9	#N/A	4	4602.92	1	1	1
1	20173	SunS_13_OVCAR3_HILIC_IntactGlycopeptide_F1.20173.20173.4.0.dta	4602.87	4	79.87	GLGFNLTELAEAEIHK	N5H6F0S3	6-5-3-0-0	-2	0	4	1	1	1	1	10		y2/y3/y4/y5/y6/y7/y8/y9/y10/y11/	2861	1741.87	5602	4	4602.9	1	1	1
1	20214	SunS_13_OVCAR3_HILIC_IntactGlycopeptide_F1.20214.20214.4.0.dta	4602.87	4	80.12	GLGFNLTELAEAEIHK	N5H6F0S3	6-5-3-0-0	-2	0	4	1	1	1	1	11	b2/	y2/y3/y4/y5/y6/y7/y8/y9/y10/y12/	2861	1741.87	#N/A	4	4602.88	1	1	1
1	20257	SunS_13_OVCAR3_HILIC_IntactGlycopeptide_F1.20257.20257.4.0.dta	4602.88	4	80.38	GLGFNLTELAEAEIHK	N5H6F0S3	6-5-3-0-0	-2	0	4	1	1	1	1	9		y2/y4/y5/y6/y7/y8/y9/y10/y11/	2861	1741.88	#N/A	4	4602.89	1	1	1
1	20300	SunS_13_OVCAR3_HILIC_IntactGlycopeptide_F1.20300.20300.4.0.dta	4602.91	4	80.64	GLGFNLTELAEAEIHK	N5H6F0S3	6-5-3-0-0	-2	0	4	1	1	1	1	9		y2/y3/y4/y5/y6/y7/y8/y9/y10/	2861	1741.91	5415	4	4602.91	1	1	1
1	20343	SunS_13_OVCAR3_HILIC_IntactGlycopeptide_F1.20343.20343.4.0.dta	4602.89	4	80.9	GLGFNLTELAEAEIHK	N5H6F0S3	6-5-3-0-0	-2	0	4	1	1	1	1	11	b6/	y2/y3/y4/y5/y6/y7/y8/y9/y10/y11/	2861	1741.89	3762	4	4602.91	1	1	1
1	20388	SunS_13_OVCAR3_HILIC_IntactGlycopeptide_F1.20388.20388.4.0.dta	4602.9	4	81.15	GLGFNLTELAEAEIHK	N5H6F0S3	6-5-3-0-0	-2	0	4	1	1	1	1	8	b6/	y2/y5/y6/y7/y8/y9/y10/	2861	1741.9	5764	4	4602.89	1	1	1
1	20562	SunS_13_OVCAR3_HILIC_IntactGlycopeptide_F1.20562.20562.4.0.dta	4602.89	4	82.18	GLGFNLTELAEAEIHK	N5H6F0S3	6-5-3-0-0	0	0	4	1	1	1	1	6		y5/y6/y7/y8/y9/y10/	2861	1741.89	4798	4	4602.89	1	1	1
1	20658	SunS_13_OVCAR3_HILIC_IntactGlycopeptide_F1.20658.20658.4.0.dta	4602.92	4	82.75	GLGFNLTELAEAEIHK	N5H6F0S3	6-5-3-0-0	-2	0	4	1	1	1	1	6	b14/	y5/y7/y8/y9/y10/	2861	1741.92	#N/A	4	4602.91	1	1	1
2	4804	SunS_13_OVCAR3_HILIC_IntactGlycopeptide_F2.4804.4804.3.0.dta	3619.39	3	24.38	GYYNQSEDGSHTLQR	N2H9F0S0	9-2-0-0-0	-2	0	4	1	1	1	1	20	b2/b3/b4/b5/b6/b8/b9/b11/	y1/y2/y3/y4/y5/y6/y7/y8/y9/y10/y11/y12/	1864.63	1754.75	1629	3	3619.39	1	1	1
2	4846	SunS_13_OVCAR3_HILIC_IntactGlycopeptide_F2.4846.4846.3.0.dta	3457.34	3	24.48	GYYNQSEDGSHTLQR	N2H8F0S0	8-2-0-0-0	-2	0	4	1	1	1	1	16	b2/b3/b4/b5/	y1/y2/y3/y4/y5/y6/y7/y8/y9/y10/y11/y12/	1702.58	1754.76	712	3	3457.35	1	1	1
2	4904	SunS_13_OVCAR3_HILIC_IntactGlycopeptide_F2.4904.4904.3.0.dta	3295.31	3	24.63	GYYNQSEDGSHTLQR	N2H7F0S0	7-2-0-0-0	-1	0	4	1	1	1	1	15	b2/b3/b4/b5/b11/	y1/y2/y3/y4/y5/y7/y8/y9/y10/y11/	1540.53	1754.78	703	3	3295.3	1	1	1
2	5254	SunS_13_OVCAR3_HILIC_IntactGlycopeptide_F2.5254.5254.4.0.dta	4610.78	4	25.71	DSEAFCHANCSGPAPAAKPDPDGGR	N2H10F0S0	10-2-0-0-0	-2	0	2	0	1	0	1	8	b3/b4/	y1/y3/y5/y7/y9/y11/	2026.69	2584.09	#N/A	4	4610.78	1	0	0
2	5259	SunS_13_OVCAR3_HILIC_IntactGlycopeptide_F2.5259.5259.4.0.dta	4448.71	4	25.73	DSEAFCHANCSGPAPAAKPDPDGGR	N2H9F0S0	9-2-0-0-0	0	0	2	0	1	0	1	22	b2/b3/b4/b5/b7/b8/b9/b10/b12/b14/	y1/y3/y5/y7/y8/y9/y10/y11/y12/y13/y14/y15/	1864.63	2584.08	#N/A	4	4448.73	1	0	0
2	5262	SunS_13_OVCAR3_HILIC_IntactGlycopeptide_F2.5262.5262.4.0.dta	4286.69	4	25.74	DSEAFCHANCSGPAPAAKPDPDGGR	N2H8F0S0	8-2-0-0-0	-2	0	2	0	1	0	1	26	b2/b3/b4/b5/b6/b7/b8/b9/b10/b12/b14/b17/b20/	y1/y3/y5/y6/y7/y8/y9/y10/y11/y12/y13/y14/y15/	1702.58	2584.1	#N/A	4	4286.68	1	0	0
2	5264	SunS_13_OVCAR3_HILIC_IntactGlycopeptide_F2.5264.5264.5.0.dta	4448.72	5	25.74	DSEAFCHANCSGPAPAAKPDPDGGR	N2H9F0S0	9-2-0-0-0	-1	0	2	0	1	0	1	6	b4/	y3/y5/y7/y8/y11/	1864.63	2584.09	#N/A	5	4448.73	1	0	0
2	5285	SunS_13_OVCAR3_HILIC_IntactGlycopeptide_F2.5285.5285.5.0.dta	4286.68	5	25.8	DSEAFCHANCSGPAPAAKPDPDGGR	N2H8F0S0	8-2-0-0-0	-1	0	1	0	0	0	1	6	b5/	y1/y3/y5/y7/y11/	1702.58	2584.09	#N/A	5	4286.68	1	0	0
2	5304	SunS_13_OVCAR3_HILIC_IntactGlycopeptide_F2.5304.5304.4.0.dta	4124.63	4	25.85	DSEAFCHANCSGPAPAAKPDPDGGR	N2H7F0S0	7-2-0-0-0	-2	0	2	0	1	0	1	17	b2/b3/b4/b5/b7/b8/b12/b14/	y1/y3/y5/y6/y7/y8/y9/y10/y11/	1540.53	2584.1	#N/A	4	4124.62	1	0	0
2	5324	SunS_13_OVCAR3_HILIC_IntactGlycopeptide_F2.5324.5324.4.0.dta	3962.58	4	25.91	DSEAFCHANCSGPAPAAKPDPDGGR	N2H6F0S0	6-2-0-0-0	-2	0	2	0	1	0	1	26	b2/b3/b4/b5/b7/b8/b9/b10/b12/b14/b16/b18/b20/	y1/y2/y3/y5/y6/y7/y8/y9/y10/y11/y12/y13/y14/	1378.48	2584.1	#N/A	4	3962.57	1	0	0
2	5554	SunS_13_OVCAR3_HILIC_IntactGlycopeptide_F2.5554.5554.4.0.dta	3655.61	4	26.47	YPHKPEINSTTHPGADLR	N4H5F0S0	5-4-0-0-0	-1	0	3	0	1	1	1	7	b3/b4/	y1/y2/y6/y7/y8/	1622.58	2033.03	5095	4	3655.6	1	1	1
2	5781	SunS_13_OVCAR3_HILIC_IntactGlycopeptide_F2.5781.5781.3.0.dta	3248.34	3	27.05	QNGSASSVAGPASGLDK	N2H8F0S0	8-2-0-0-0	-1	0	4	1	1	1	1	13		y1/y2/y4/y5/y7/y8/y9/y10/y11/y12/y13/y14/y15/	1702.58	1545.76	42	3	3248.33	1	1	1
2	5907	SunS_13_OVCAR3_HILIC_IntactGlycopeptide_F2.5907.5907.5.0.dta	4311.81	5	27.42	YPHKPEINSTTHPGADLR	N5H6F0S1	6-5-1-0-0	-1	0	3	0	1	1	1	11	b3/b4/b7/	y1/y2/y3/y5/y6/y7/y8/y14/	2278.81	2033	6512	5	4311.82	1	1	1
2	5926	SunS_13_OVCAR3_HILIC_IntactGlycopeptide_F2.5926.5926.5.0.dta	4092.74	5	27.47	YPHKPEINSTTHPGADLR	N4H5F1S1	5-4-1-1-0	-2	0	3	0	1	1	1	8	b3/b4/	y1/y2/y6/y7/y8/y14/	2059.73	2033.01	5624	5	4092.74	1	1	1
2	5928	SunS_13_OVCAR3_HILIC_IntactGlycopeptide_F2.5928.5928.4.0.dta	3905.65	4	27.47	YPHKPEINSTTHPGADLR	N3H6F0S1	6-3-1-0-0	-1	0	3	0	1	1	1	11	b3/b4/	y1/y2/y5/y6/y7/y8/y9/y10/y14/	1872.65	2033	4965	4	3905.66	1	1	1
2	5945	SunS_13_OVCAR3_HILIC_IntactGlycopeptide_F2.5945.5945.4.0.dta	3946.68	4	27.51	YPHKPEINSTTHPGADLR	N4H5F0S1	5-4-1-0-0	-2	0	4	1	1	1	1	17	b2/b3/b4/b6/b7/b8/	y1/y2/y3/y4/y5/y6/y7/y8/y9/y10/y14/	1913.68	2033.01	4767	4	3946.68	1	1	1
2	5946	SunS_13_OVCAR3_HILIC_IntactGlycopeptide_F2.5946.5946.5.0.dta	3946.67	5	27.52	YPHKPEINSTTHPGADLR	N4H5F0S1	5-4-1-0-0	-2	0	3	0	1	1	1	16	b2/b3/b4/b6/b7/b8/	y1/y2/y3/y5/y6/y7/y8/y9/y10/y14/	1913.68	2032.99	5038	5	3946.68	1	1	1
2	5948	SunS_13_OVCAR3_HILIC_IntactGlycopeptide_F2.5948.5948.3.0.dta	3946.67	3	27.52	YPHKPEINSTTHPGADLR	N4H5F0S1	5-4-1-0-0	0	0	3	0	1	1	1	13	b3/b4/b6/	y1/y2/y3/y5/y6/y7/y8/y9/y10/y14/	1913.68	2032.99	4781	3	3946.68	1	1	1
2	5949	SunS_13_OVCAR3_HILIC_IntactGlycopeptide_F2.5949.5949.4.0.dta	4092.73	4	27.52	YPHKPEINSTTHPGADLR	N4H5F1S1	5-4-1-1-0	-1	0	3	0	1	1	1	10	b3/b4/b8/	y1/y2/y6/y7/y8/y9/y14/	2059.73	2033	5277	4	4092.74	1	1	1
2	5987	SunS_13_OVCAR3_HILIC_IntactGlycopeptide_F2.5987.5987.4.0.dta	3743.6	4	27.61	YPHKPEINSTTHPGADLR	N3H5F0S1	5-3-1-0-0	0	0	2	0	1	0	1	11	b2/b3/b4/	y1/y2/y6/y7/y8/y9/y10/y14/	1710.6	2033.01	5497	4	3743.6	1	1	1
2	6069	SunS_13_OVCAR3_HILIC_IntactGlycopeptide_F2.6069.6069.4.0.dta	3946.69	4	27.81	YPHKPEINSTTHPGADLR	N4H5F0S1	5-4-1-0-0	-1	0	4	1	1	1	1	19	b2/b3/b4/b6/b7/b8/b16/	y1/y2/y3/y4/y5/y6/y7/y8/y9/y10/y14/y16/	1913.68	2033.01	4366	4	3946.69	1	1	1
2	6071	SunS_13_OVCAR3_HILIC_IntactGlycopeptide_F2.6071.6071.5.0.dta	3946.7	5	27.81	YPHKPEINSTTHPGADLR	N4H5F0S1	5-4-1-0-0	-1	0	3	0	1	1	1	13	b2/b3/b4/b8/	y1/y2/y5/y6/y7/y8/y9/y10/y14/	1913.68	2033.02	4942	5	3946.69	1	1	1
2	6073	SunS_13_OVCAR3_HILIC_IntactGlycopeptide_F2.6073.6073.3.0.dta	3946.69	3	27.82	YPHKPEINSTTHPGADLR	N4H5F0S1	5-4-1-0-0	-1	0	3	0	1	1	1	9	b3/b4/	y1/y2/y6/y7/y8/y10/y14/	1913.68	2033.02	3918	3	3946.69	1	1	1
2	6138	SunS_13_OVCAR3_HILIC_IntactGlycopeptide_F2.6138.6138.4.0.dta	3326.42	4	27.98	DLGPTLANSTHHNVR	N3H4F1S1	4-3-1-1-0	-2	0	4	1	1	1	1	7	b6/b7/	y1/y2/y3/y4/y5/	1694.6	1631.82	3380	4	3326.42	1	1	1
2	6152	SunS_13_OVCAR3_HILIC_IntactGlycopeptide_F2.6152.6152.3.0.dta	3326.44	3	28.02	DLGPTLANSTHHNVR	N3H4F1S1	4-3-1-1-0	0	0	4	1	1	1	1	11	b5/b6/b7/	y1/y2/y3/y4/y5/y6/y7/y8/	1694.6	1631.84	#N/A	3	3326.42	1	1	1
2	6309	SunS_13_OVCAR3_HILIC_IntactGlycopeptide_F2.6309.6309.3.0.dta	2433.03	3	28.43	YHGFLNTSYHR	N2H3F1S0	3-2-0-1-0	0	0	4	1	1	1	1	9	b2/b3/b4/	y1/y3/y4/y5/y7/y9/	1038.38	1394.66	869	3	2433.03	1	1	1
2	6347	SunS_13_OVCAR3_HILIC_IntactGlycopeptide_F2.6347.6347.3.0.dta	3633.46	3	28.52	NSSVGPLYSGCR	N6H6F1S0	6-6-0-1-0	-2	0	2	1	0	1	0	8		y1/y4/y5/y7/y8/y9/y10/y11/	2336.85	1296.6	2865	3	3633.45	1	1	1
2	6361	SunS_13_OVCAR3_HILIC_IntactGlycopeptide_F2.6361.6361.3.0.dta	3161.22	3	28.55	NSSVGPLYSGCR	N2H9F0S0	9-2-0-0-0	-1	0	4	1	1	1	1	11	b2/b3/	y1/y3/y4/y5/y7/y8/y9/y10/y11/	1864.63	1296.58	1176	3	3161.22	1	1	1
2	6438	SunS_13_OVCAR3_HILIC_IntactGlycopeptide_F2.6438.6438.4.0.dta	3968.53	4	28.74	VWQGHANASFCPHGYGCR	N2H9F0S0	9-2-0-0-0	-1	0	4	1	1	1	1	23	b2/b3/b4/b5/b6/b7/b8/b9/b10/b11/	y1/y2/y3/y4/y5/y6/y7/y8/y9/y10/y11/y12/y13/	1864.63	2103.89	#N/A	4	3968.55	1	0	0
2	6456	SunS_13_OVCAR3_HILIC_IntactGlycopeptide_F2.6456.6456.3.0.dta	3968.54	3	28.79	VWQGHANASFCPHGYGCR	N2H9F0S0	9-2-0-0-0	0	0	4	1	1	1	1	26	b2/b3/b4/b5/b6/b7/b8/b9/b10/b11/b13/b15/	y1/y2/y3/y4/y5/y6/y7/y8/y9/y10/y11/y12/y13/y15/	1864.63	2103.9	#N/A	3	3968.53	1	0	0
2	6480	SunS_13_OVCAR3_HILIC_IntactGlycopeptide_F2.6480.6480.4.0.dta	3806.49	4	28.85	VWQGHANASFCPHGYGCR	N2H8F0S0	8-2-0-0-0	0	0	3	0	1	1	1	19	b2/b4/b5/b6/b7/b8/b9/b10/	y1/y3/y4/y5/y6/y7/y8/y9/y10/y11/y12/	1702.58	2103.91	#N/A	4	3806.48	1	0	0
2	6484	SunS_13_OVCAR3_HILIC_IntactGlycopeptide_F2.6484.6484.3.0.dta	3806.47	3	28.86	VWQGHANASFCPHGYGCR	N2H8F0S0	8-2-0-0-0	0	0	3	0	1	1	1	15	b2/b5/b6/b7/b8/	y1/y3/y4/y5/y6/y7/y8/y9/y10/y11/	1702.58	2103.89	#N/A	3	3806.47	1	0	0
2	6487	SunS_13_OVCAR3_HILIC_IntactGlycopeptide_F2.6487.6487.3.0.dta	3693.45	3	28.87	CATVTENATGDLATSR	N2H10F0S0	10-2-0-0-0	-2	0	4	1	1	1	1	18	b2/b3/b4/b5/b10/	y1/y2/y3/y4/y5/y6/y7/y8/y9/y10/y11/y12/y14/	2026.69	1666.76	570	3	3693.46	1	1	1
2	6511	SunS_13_OVCAR3_HILIC_IntactGlycopeptide_F2.6511.6511.3.0.dta	3369.36	3	28.95	CATVTENATGDLATSR	N2H8F0S0	8-2-0-0-0	0	0	4	1	1	1	1	20	b2/b3/b4/b5/b8/b9/	y1/y2/y3/y4/y5/y6/y7/y8/y9/y10/y11/y12/y13/y14/	1702.58	1666.77	207	3	3369.35	1	1	1
2	6527	SunS_13_OVCAR3_HILIC_IntactGlycopeptide_F2.6527.6527.4.0.dta	3968.52	4	29.01	VWQGHANASFCPHGYGCR	N2H9F0S0	9-2-0-0-0	-2	0	3	0	1	1	1	15	b2/b3/b5/b6/b8/b11/	y1/y3/y4/y5/y6/y7/y8/y10/y11/	1864.63	2103.89	13327	4	3968.54	1	0	0
2	6712	SunS_13_OVCAR3_HILIC_IntactGlycopeptide_F2.6712.6712.3.0.dta	2970.22	3	29.6	ENATTDLLTK	N2H9F0S0	9-2-0-0-0	-1	0	3	1	0	1	1	11	b3/b7/b8/	y1/y2/y3/y4/y5/y6/y7/y8/	1864.63	1105.58	484	3	2970.21	1	1	1
2	6749	SunS_13_OVCAR3_HILIC_IntactGlycopeptide_F2.6749.6749.3.0.dta	2808.17	3	29.7	ENATTDLLTK	N2H8F0S0	8-2-0-0-0	0	0	4	1	1	1	1	12	b6/b7/b8/b9/	y1/y2/y3/y4/y5/y6/y7/y8/	1702.58	1105.58	#N/A	3	2807.12	0	1	0
2	6957	SunS_13_OVCAR3_HILIC_IntactGlycopeptide_F2.6957.6957.3.0.dta	2658.13	3	30.3	VQPFNVTQGK	N2H7F0S0	7-2-0-0-0	0	0	4	1	1	1	1	12	b2/b6/b7/b8/b9/	y2/y3/y4/y5/y6/y7/y8/	1540.53	1117.6	1090	3	2658.13	1	1	1
2	6977	SunS_13_OVCAR3_HILIC_IntactGlycopeptide_F2.6977.6977.4.0.dta	3521.53	4	30.36	THNLTDLSPHLR	N5H5F2S0	5-5-0-2-0	0	0	4	1	1	1	1	7	b2/	y4/y5/y6/y7/y8/y9/	2117.78	1403.75	2331	4	3521.52	1	1	1
2	6980	SunS_13_OVCAR3_HILIC_IntactGlycopeptide_F2.6980.6980.4.0.dta	3969.66	4	30.36	FTFTSHTPGEHQICLHSNSTK	N2H7F0S0	7-2-0-0-0	-2	0	2	0	1	0	1	8	b2/b6/b7/b10/b11/	y6/y8/y14/	1540.53	2429.13	5287	4	3969.67	1	1	1
2	7002	SunS_13_OVCAR3_HILIC_IntactGlycopeptide_F2.7002.7002.3.0.dta	2957.2	3	30.42	NISQVLEK	N2H10F0S0	10-2-0-0-0	0	0	2	1	0	1	0	9	b2/b3/b5/b6/b7/	y2/y3/y4/y6/	2026.69	930.518	2843	3	2957.21	1	0	0
2	7009	SunS_13_OVCAR3_HILIC_IntactGlycopeptide_F2.7009.7009.3.0.dta	3268.37	3	30.44	THNLTDLSPHLR	N2H9F0S0	9-2-0-0-0	-1	0	4	1	1	1	1	14	b2/b3/b4/b6/b7/	y1/y2/y4/y5/y6/y7/y8/y9/y10/	1864.63	1403.73	148	3	3268.37	1	1	1
2	7019	SunS_13_OVCAR3_HILIC_IntactGlycopeptide_F2.7019.7019.4.0.dta	3807.59	4	30.46	FTFTSHTPGEHQICLHSNSTK	N2H6F0S0	6-2-0-0-0	-2	0	2	0	1	0	1	27	b2/b3/b4/b5/b6/b7/b8/b9/b10/b11/b12/b13/b14/b15/b16/	y1/y2/y3/y4/y5/y6/y7/y8/y9/y10/y11/y14/	1378.48	2429.12	3423	4	3807.61	1	1	1
2	7020	SunS_13_OVCAR3_HILIC_IntactGlycopeptide_F2.7020.7020.5.0.dta	3807.6	5	30.47	FTFTSHTPGEHQICLHSNSTK	N2H6F0S0	6-2-0-0-0	0	0	2	0	1	0	1	13	b2/b4/b6/b7/b10/b11/	y1/y3/y5/y6/y8/y9/y14/	1378.48	2429.12	5084	5	3807.61	1	1	1
2	7021	SunS_13_OVCAR3_HILIC_IntactGlycopeptide_F2.7021.7021.3.0.dta	3807.61	3	30.47	FTFTSHTPGEHQICLHSNSTK	N2H6F0S0	6-2-0-0-0	0	0	2	0	1	0	1	18	b2/b4/b6/b7/b10/b11/b12/b13/b14/b15/b16/	y3/y4/y5/y6/y8/y9/y14/	1378.48	2429.13	4082	3	3807.6	1	1	1
2	7022	SunS_13_OVCAR3_HILIC_IntactGlycopeptide_F2.7022.7022.3.0.dta	2496.07	3	30.47	VQPFNVTQGK	N2H6F0S0	6-2-0-0-0	0	0	4	1	1	1	1	13	b2/b5/b6/b7/b8/b9/	y2/y3/y4/y5/y6/y7/y8/	1378.48	1117.59	1109	3	2496.08	1	1	1
2	7025	SunS_13_OVCAR3_HILIC_IntactGlycopeptide_F2.7025.7025.4.0.dta	3268.38	4	30.48	THNLTDLSPHLR	N2H9F0S0	9-2-0-0-0	-1	0	4	1	1	1	1	14	b2/b3/b4/b6/b7/	y1/y2/y4/y5/y6/y7/y8/y9/y10/	1864.63	1403.74	149	4	3268.37	1	1	1
2	7026	SunS_13_OVCAR3_HILIC_IntactGlycopeptide_F2.7026.7026.3.0.dta	2699.16	3	30.48	VQPFNVTQGK	N3H6F0S0	6-3-0-0-0	0	0	3	1	0	1	1	8	b2/b6/b7/b8/	y2/y4/y5/y8/	1581.56	1117.61	1471	3	2699.15	1	1	1
2	7027	SunS_13_OVCAR3_HILIC_IntactGlycopeptide_F2.7027.7027.4.0.dta	3156.38	4	30.48	THNLTDLSPHLR	N4H4F2S0	4-4-0-2-0	0	0	4	1	1	1	1	10	b2/b7/	y1/y4/y5/y6/y7/y8/y9/y10/	1752.64	1403.74	857	4	3156.38	1	1	1
2	7028	SunS_13_OVCAR3_HILIC_IntactGlycopeptide_F2.7028.7028.3.0.dta	2795.15	3	30.48	NISQVLEK	N2H9F0S0	9-2-0-0-0	0	0	4	1	1	1	1	13	b2/b3/b4/b5/b6/b7/	y1/y2/y3/y4/y5/y6/y7/	1864.63	930.521	#N/A	3	2795.16	1	0	0
2	7040	SunS_13_OVCAR3_HILIC_IntactGlycopeptide_F2.7040.7040.3.0.dta	3106.32	3	30.52	THNLTDLSPHLR	N2H8F0S0	8-2-0-0-0	-1	0	4	1	1	1	1	13	b2/b3/b4/b7/	y1/y2/y4/y5/y6/y7/y8/y9/y10/	1702.58	1403.74	259	3	3106.32	1	1	1
2	7041	SunS_13_OVCAR3_HILIC_IntactGlycopeptide_F2.7041.7041.4.0.dta	3106.32	4	30.52	THNLTDLSPHLR	N2H8F0S0	8-2-0-0-0	0	0	4	1	1	1	1	12	b2/b4/b7/	y1/y3/y4/y5/y6/y7/y8/y9/y10/	1702.58	1403.74	444	4	3106.32	1	1	1
2	7042	SunS_13_OVCAR3_HILIC_IntactGlycopeptide_F2.7042.7042.4.0.dta	3645.54	4	30.52	FTFTSHTPGEHQICLHSNSTK	N2H5F0S0	5-2-0-0-0	-2	0	2	0	1	0	1	12	b2/b6/b7/b10/b11/b13/b15/	y5/y6/y8/y9/y14/	1216.42	2429.12	6346	4	3645.55	1	1	1
2	7069	SunS_13_OVCAR3_HILIC_IntactGlycopeptide_F2.7069.7069.3.0.dta	3645.54	3	30.59	FTFTSHTPGEHQICLHSNSTK	N2H5F0S0	5-2-0-0-0	0	0	2	0	1	0	1	12	b2/b6/b7/b10/b12/b15/b16/	y5/y6/y8/y9/y14/	1216.42	2429.12	3635	3	3645.55	1	1	1
2	7082	SunS_13_OVCAR3_HILIC_IntactGlycopeptide_F2.7082.7082.3.0.dta	2633.11	3	30.62	NISQVLEK	N2H8F0S0	8-2-0-0-0	0	0	4	1	1	1	1	13	b2/b3/b4/b5/b6/b7/	y1/y2/y3/y4/y5/y6/y7/	1702.58	930.525	#N/A	3	2633.11	1	0	0
2	7086	SunS_13_OVCAR3_HILIC_IntactGlycopeptide_F2.7086.7086.3.0.dta	3873.67	3	30.63	FTFTSHTPGEHQICLHSNSTK	N4H3F1S0	3-4-0-1-0	-2	0	2	0	1	0	1	6	b2/b6/b7/b16/	y5/y14/	1444.53	2429.14	4949	3	3873.67	1	1	1
2	7087	SunS_13_OVCAR3_HILIC_IntactGlycopeptide_F2.7087.7087.4.0.dta	2944.26	4	30.63	THNLTDLSPHLR	N2H7F0S0	7-2-0-0-0	0	0	4	1	1	1	1	7	b2/	y4/y5/y6/y8/y9/y10/	1540.53	1403.73	1118	4	2944.27	1	1	1
2	7111	SunS_13_OVCAR3_HILIC_IntactGlycopeptide_F2.7111.7111.4.0.dta	3670.58	4	30.7	FTFTSHTPGEHQICLHSNSTK	N3H3F1S0	3-3-0-1-0	0	0	2	0	1	0	1	6	b2/b6/b7/b10/	y8/y14/	1241.45	2429.13	#N/A	2	1835.8	0	1	0
2	7122	SunS_13_OVCAR3_HILIC_IntactGlycopeptide_F2.7122.7122.4.0.dta	4145.69	4	30.72	FTFTSHTPGDHQICLHSNSTR	N2H8F0S0	8-2-0-0-0	-2	0	2	0	1	0	1	6	b2/b4/b6/b7/b10/	y1/	1702.58	2443.11	6331	4	4145.7	1	1	1
2	7145	SunS_13_OVCAR3_HILIC_IntactGlycopeptide_F2.7145.7145.3.0.dta	2334.02	3	30.78	VQPFNVTQGK	N2H5F0S0	5-2-0-0-0	0	0	3	1	0	1	1	6	b2/b6/	y2/y4/y6/y8/	1216.42	1117.59	1860	3	2334.02	1	1	1
2	7168	SunS_13_OVCAR3_HILIC_IntactGlycopeptide_F2.7168.7168.3.0.dta	4215.66	3	30.85	LRNPCTSEQNCTSPFSYK	N2H10F0S0	10-2-0-0-0	-2	0	4	1	1	1	1	19	b2/b3/b5/b6/b7/b8/b9/b12/b13/	y1/y2/y3/y4/y5/y6/y7/y8/y9/y13/	2026.69	2188.97	3227	3	4215.66	1	1	1
2	7170	SunS_13_OVCAR3_HILIC_IntactGlycopeptide_F2.7170.7170.4.0.dta	4215.66	4	30.85	LRNPCTSEQNCTSPFSYK	N2H10F0S0	10-2-0-0-0	0	0	4	1	1	1	1	19	b2/b3/b5/b6/b7/b8/b9/b10/b12/b13/	y1/y2/y3/y5/y6/y7/y8/y9/y13/	2026.69	2188.98	3997	4	4215.67	1	1	1
2	7187	SunS_13_OVCAR3_HILIC_IntactGlycopeptide_F2.7187.7187.3.0.dta	4053.62	3	30.9	LRNPCTSEQNCTSPFSYK	N2H9F0S0	9-2-0-0-0	0	0	4	1	1	1	1	19	b2/b3/b5/b6/b7/b8/b9/b10/b12/b13/	y1/y2/y3/y5/y6/y7/y8/y9/y13/	1864.63	2188.99	2289	3	4053.61	1	1	1
2	7195	SunS_13_OVCAR3_HILIC_IntactGlycopeptide_F2.7195.7195.4.0.dta	4053.62	4	30.92	LRNPCTSEQNCTSPFSYK	N2H9F0S0	9-2-0-0-0	-2	0	4	1	1	1	1	22	b2/b3/b5/b6/b7/b8/b9/b10/b11/b12/b13/	y1/y2/y3/y4/y5/y6/y7/y8/y9/y11/y13/	1864.63	2188.99	3357	4	4053.61	1	1	1
2	7197	SunS_13_OVCAR3_HILIC_IntactGlycopeptide_F2.7197.7197.4.0.dta	3821.6	4	30.93	FTFTSHTPGDHQICLHSNSTR	N2H6F0S0	6-2-0-0-0	-2	0	2	0	1	0	1	8	b2/b6/b7/b10/b11/	y1/y6/y14/	1378.48	2443.12	5600	4	3821.6	1	1	1
2	7211	SunS_13_OVCAR3_HILIC_IntactGlycopeptide_F2.7211.7211.3.0.dta	3891.57	3	30.96	LRNPCTSEQNCTSPFSYK	N2H8F0S0	8-2-0-0-0	0	0	3	0	1	1	1	19	b2/b3/b5/b6/b7/b8/b9/b10/b12/b13/	y1/y2/y3/y5/y6/y7/y8/y9/y13/	1702.58	2188.99	2819	3	3891.56	1	1	1
2	7215	SunS_13_OVCAR3_HILIC_IntactGlycopeptide_F2.7215.7215.4.0.dta	3891.57	4	30.97	LRNPCTSEQNCTSPFSYK	N2H8F0S0	8-2-0-0-0	-2	0	4	1	1	1	1	20	b2/b3/b5/b6/b7/b8/b9/b11/b12/b13/	y1/y2/y3/y5/y6/y7/y8/y9/y11/y13/	1702.58	2188.98	3111	4	3891.55	1	1	1
2	7229	SunS_13_OVCAR3_HILIC_IntactGlycopeptide_F2.7229.7229.3.0.dta	2309.01	3	31.02	NISQVLEK	N2H6F0S0	6-2-0-0-0	0	0	3	1	0	1	1	12	b2/b3/b4/b5/b6/b7/	y2/y3/y4/y5/y6/y7/	1378.48	930.529	#N/A	3	2309	1	0	0
2	7515	SunS_13_OVCAR3_HILIC_IntactGlycopeptide_F2.7515.7515.3.0.dta	3392.46	3	31.79	LENITTGTYTIHAQK	N2H8F0S0	8-2-0-0-0	0	0	4	1	1	1	1	12	b2/b3/b4/	y2/y3/y4/y6/y7/y8/y9/y10/y11/	1702.58	1689.88	2573	3	3392.46	1	1	1
2	7563	SunS_13_OVCAR3_HILIC_IntactGlycopeptide_F2.7563.7563.3.0.dta	3230.41	3	31.94	LENITTGTYTIHAQK	N2H7F0S0	7-2-0-0-0	-1	0	4	1	1	1	1	13	b2/b3/b4/b6/	y3/y4/y5/y6/y7/y8/y9/y10/y11/	1540.53	1689.88	902	3	3230.41	1	1	1
2	7574	SunS_13_OVCAR3_HILIC_IntactGlycopeptide_F2.7574.7574.3.0.dta	3068.36	3	31.97	LENITTGTYTIHAQK	N2H6F0S0	6-2-0-0-0	0	0	4	1	1	1	1	14	b2/b3/b4/b7/	y3/y4/y5/y6/y7/y8/y9/y10/y11/y12/	1378.48	1689.88	778	3	3068.36	1	1	1
2	7620	SunS_13_OVCAR3_HILIC_IntactGlycopeptide_F2.7620.7620.3.0.dta	2906.3	3	32.17	LENITTGTYTIHAQK	N2H5F0S0	5-2-0-0-0	0	0	4	1	1	1	1	18	b2/b3/b4/b5/b6/b10/	y1/y2/y3/y4/y5/y6/y7/y8/y9/y10/y11/y12/	1216.42	1689.88	443	3	2906.31	1	1	1
2	7639	SunS_13_OVCAR3_HILIC_IntactGlycopeptide_F2.7639.7639.3.0.dta	3068.36	3	32.23	LENITTGTYTIHAQK	N2H6F0S0	6-2-0-0-0	-1	0	4	1	1	1	1	6	b2/b4/	y4/y9/y10/y11/	1378.48	1689.88	2571	3	3068.36	1	1	1
2	7699	SunS_13_OVCAR3_HILIC_IntactGlycopeptide_F2.7699.7699.3.0.dta	3441.46	3	32.4	DNATLQATLHAAR	N4H5F1S1	5-4-1-1-0	-2	0	4	1	1	1	1	9		y1/y2/y3/y4/y5/y6/y7/y8/y11/	2059.73	1381.72	3301	3	3441.45	1	1	1
2	7703	SunS_13_OVCAR3_HILIC_IntactGlycopeptide_F2.7703.7703.4.0.dta	3441.46	4	32.4	DNATLQATLHAAR	N4H5F1S1	5-4-1-1-0	-1	0	3	1	0	1	1	6	b3/	y3/y4/y7/y8/y10/	2059.73	1381.72	2041	4	3441.46	1	1	1
2	7756	SunS_13_OVCAR3_HILIC_IntactGlycopeptide_F2.7756.7756.4.0.dta	3666.69	4	32.55	IAPASNVSHTVVLRPLK	N2H9F0S0	9-2-0-0-0	0	0	4	1	1	1	1	12	b2/b7/	y1/y3/y4/y5/y6/y7/y8/y9/y10/y11/	1864.63	1802.06	4604	4	3666.7	1	1	1
2	7767	SunS_13_OVCAR3_HILIC_IntactGlycopeptide_F2.7767.7767.3.0.dta	3666.68	3	32.58	IAPASNVSHTVVLRPLK	N2H9F0S0	9-2-0-0-0	-2	0	4	1	1	1	1	13	b2/b7/b8/b9/	y3/y4/y5/y6/y7/y8/y9/y10/y11/	1864.63	1802.05	5359	3	3666.7	1	1	1
2	7780	SunS_13_OVCAR3_HILIC_IntactGlycopeptide_F2.7780.7780.4.0.dta	3504.66	4	32.62	IAPASNVSHTVVLRPLK	N2H8F0S0	8-2-0-0-0	-1	0	4	1	1	1	1	11	b2/b7/b9/	y3/y4/y5/y6/y7/y8/y9/y10/	1702.58	1802.08	6075	4	3504.65	1	1	1
2	7781	SunS_13_OVCAR3_HILIC_IntactGlycopeptide_F2.7781.7781.3.0.dta	3504.65	3	32.62	IAPASNVSHTVVLRPLK	N2H8F0S0	8-2-0-0-0	-1	0	4	1	1	1	1	12	b2/b7/b12/	y3/y4/y5/y6/y7/y8/y9/y10/y11/	1702.58	1802.07	#N/A	3	3504.65	1	1	1
2	7793	SunS_13_OVCAR3_HILIC_IntactGlycopeptide_F2.7793.7793.3.0.dta	3479.48	3	32.65	GVHNASLALSASIGR	N2H10F0S0	10-2-0-0-0	-1	0	4	1	1	1	1	16	b3/b4/b5/b8/	y1/y2/y3/y4/y5/y6/y7/y8/y9/y10/y11/y12/	2026.69	1452.79	255	3	3479.48	1	1	1
2	7838	SunS_13_OVCAR3_HILIC_IntactGlycopeptide_F2.7838.7838.3.0.dta	3155.38	3	32.78	GVHNASLALSASIGR	N2H8F0S0	8-2-0-0-0	-1	0	4	1	1	1	1	17	b3/b4/b5/b7/b8/	y1/y2/y3/y4/y5/y6/y7/y8/y9/y10/y11/y12/	1702.58	1452.8	1036	3	3155.38	1	1	1
2	7866	SunS_13_OVCAR3_HILIC_IntactGlycopeptide_F2.7866.7866.3.0.dta	2420.09	3	32.85	NITIVTGAPR	N2H6F0S0	6-2-0-0-0	0	0	2	1	0	1	0	10	b2/b3/b8/	y2/y4/y5/y6/y7/y8/y9/	1378.48	1041.61	362	3	2420.08	1	1	1
2	7891	SunS_13_OVCAR3_HILIC_IntactGlycopeptide_F2.7891.7891.3.0.dta	2993.32	3	32.91	GVHNASLALSASIGR	N2H7F0S0	7-2-0-0-0	-1	0	4	1	1	1	1	11	b3/b5/b8/	y2/y4/y6/y7/y8/y9/y10/y11/	1540.53	1452.79	823	3	2993.33	1	1	1
2	7970	SunS_13_OVCAR3_HILIC_IntactGlycopeptide_F2.7970.7970.3.0.dta	3140.27	3	33.18	ELISNASDALDK	N2H9F0S0	9-2-0-0-0	0	0	2	1	0	1	0	6	b2/b3/	y2/y4/y6/y7/	1864.63	1275.64	997	3	3140.28	1	1	1
2	8112	SunS_13_OVCAR3_HILIC_IntactGlycopeptide_F2.8112.8112.3.0.dta	3403.41	3	33.72	KQNNGAFNETLFR	N2H9F0S0	9-2-0-0-0	-1	0	4	1	1	1	1	15	b1/b2/b3/b4/b7/b11/	y1/y2/y3/y4/y5/y7/y9/y11/y12/	1864.63	1538.77	2876	3	3403.41	1	1	1
2	8127	SunS_13_OVCAR3_HILIC_IntactGlycopeptide_F2.8127.8127.3.0.dta	3241.36	3	33.77	KQNNGAFNETLFR	N2H8F0S0	8-2-0-0-0	0	0	4	1	1	1	1	10	b1/b2/b3/b6/	y1/y2/y3/y4/y9/y11/	1702.58	1538.78	2940	3	3241.35	1	1	1
2	8206	SunS_13_OVCAR3_HILIC_IntactGlycopeptide_F2.8206.8206.3.0.dta	3241.34	3	34.04	KQNNGAFNETLFR	N2H8F0S0	8-2-0-0-0	0	0	4	1	1	1	1	11	b1/b2/b3/b6/	y1/y2/y3/y4/y5/y7/y9/	1702.58	1538.76	899	3	3241.35	1	1	1
2	8351	SunS_13_OVCAR3_HILIC_IntactGlycopeptide_F2.8351.8351.4.0.dta	4647.91	4	34.4	MDKSDAVSHTGNYTCEVTELTR	N5H6F1S0	6-5-0-1-0	-3	0	2	0	1	0	1	7	b7/b10/	y1/y2/y3/y5/y6/	2133.77	2514.14	8677	4	4647.9	1	0	0
2	8378	SunS_13_OVCAR3_HILIC_IntactGlycopeptide_F2.8378.8378.3.0.dta	2700.15	3	34.47	GHTLTLNFTR	N2H7F0S0	7-2-0-0-0	0	0	4	1	1	1	1	13	b2/b3/b4/b5/b6/b7/b8/	y1/y2/y3/y4/y6/y8/	1540.53	1159.62	334	3	2700.16	1	1	1
2	8388	SunS_13_OVCAR3_HILIC_IntactGlycopeptide_F2.8388.8388.4.0.dta	4540.8	4	34.49	MDKSDAVSHTGNYTCEVTELTR	N2H10F0S0	10-2-0-0-0	-1	0	2	0	1	0	1	9	b5/b7/	y1/y5/y6/y7/y8/y9/y13/	2026.69	2514.11	#N/A	2	2271.41	0	1	0
2	8401	SunS_13_OVCAR3_HILIC_IntactGlycopeptide_F2.8401.8401.4.0.dta	4216.7	4	34.53	MDKSDAVSHTGNYTCEVTELTR	N2H8F0S0	8-2-0-0-0	0	0	2	0	1	0	1	23	b2/b3/b4/b5/b6/b7/b8/b9/b10/b11/b12/	y1/y2/y3/y4/y5/y6/y7/y8/y9/y10/y12/y13/	1702.58	2514.11	8557	4	4216.71	1	0	0
2	8415	SunS_13_OVCAR3_HILIC_IntactGlycopeptide_F2.8415.8415.4.0.dta	4370.79	4	34.56	MDKSDAVSHTGNYTCEVTELTR	N3H5F1S1	5-3-1-1-0	-3	0	2	0	1	0	1	12	b5/b7/b8/b9/b10/	y1/y3/y5/y6/y8/y9/y10/	1856.66	2514.13	7864	4	4371.8	0	1	0
2	8416	SunS_13_OVCAR3_HILIC_IntactGlycopeptide_F2.8416.8416.3.0.dta	4216.7	3	34.56	MDKSDAVSHTGNYTCEVTELTR	N2H8F0S0	8-2-0-0-0	-2	0	2	0	1	0	1	11	b5/b7/b9/b10/	y2/y3/y5/y6/y8/y9/y10/	1702.58	2514.12	#N/A	3	4216.7	1	0	0
2	8430	SunS_13_OVCAR3_HILIC_IntactGlycopeptide_F2.8430.8430.4.0.dta	4224.73	4	34.6	MDKSDAVSHTGNYTCEVTELTR	N3H5F0S1	5-3-1-0-0	-3	0	2	0	1	0	1	12	b5/b7/b8/b9/b10/	y1/y3/y4/y5/y6/y8/y9/	1710.6	2514.13	#N/A	4	4225.74	0	1	0
2	8438	SunS_13_OVCAR3_HILIC_IntactGlycopeptide_F2.8438.8438.4.0.dta	4054.66	4	34.62	MDKSDAVSHTGNYTCEVTELTR	N2H7F0S0	7-2-0-0-0	-3	0	2	0	1	0	1	11	b6/b7/b9/b10/	y1/y3/y5/y6/y7/y8/y9/	1540.53	2514.13	5373	4	4054.66	1	0	0
2	8470	SunS_13_OVCAR3_HILIC_IntactGlycopeptide_F2.8470.8470.3.0.dta	3191.29	3	34.73	NTSVGLLYSGCR	N2H9F0S0	9-2-0-0-0	-1	0	2	1	0	1	0	10	b2/	y1/y3/y4/y5/y6/y7/y8/y9/y10/	1864.63	1326.65	587	3	3191.28	1	1	1
2	8499	SunS_13_OVCAR3_HILIC_IntactGlycopeptide_F2.8499.8499.3.0.dta	3410.51	3	34.81	KNLTLMATTSQLPK	N2H9F0S0	9-2-0-0-0	0	0	4	1	1	1	1	21	b1/b2/b3/b4/b6/b7/b10/b12/	y1/y2/y3/y4/y5/y6/y7/y8/y9/y10/y11/y12/y13/	1864.63	1545.88	10279	3	3410.5	1	0	0
2	8514	SunS_13_OVCAR3_HILIC_IntactGlycopeptide_F2.8514.8514.3.0.dta	3248.44	3	34.86	KNLTLMATTSQLPK	N2H8F0S0	8-2-0-0-0	0	0	4	1	1	1	1	24	b1/b2/b3/b4/b5/b6/b7/b9/b10/b11/b12/	y1/y2/y3/y4/y5/y6/y7/y8/y9/y10/y11/y12/y13/	1702.58	1545.86	11361	3	3248.45	1	0	0
2	8521	SunS_13_OVCAR3_HILIC_IntactGlycopeptide_F2.8521.8521.4.0.dta	3248.44	4	34.88	KNLTLMATTSQLPK	N2H8F0S0	8-2-0-0-0	0	0	4	1	1	1	1	8	b1/	y1/y2/y3/y7/y8/y9/y11/	1702.58	1545.86	#N/A	4	3248.45	1	0	0
2	8545	SunS_13_OVCAR3_HILIC_IntactGlycopeptide_F2.8545.8545.3.0.dta	3444.4	3	34.95	NTSVGLLYSGCR	N5H5F2S0	5-5-0-2-0	-2	0	2	1	0	1	0	7	b5/	y1/y5/y6/y8/y9/y10/	2117.78	1326.63	4983	3	3444.42	1	1	1
2	8555	SunS_13_OVCAR3_HILIC_IntactGlycopeptide_F2.8555.8555.3.0.dta	3086.39	3	34.97	KNLTLMATTSQLPK	N2H7F0S0	7-2-0-0-0	-1	0	4	1	1	1	1	13	b1/b12/	y1/y2/y3/y5/y6/y7/y8/y9/y10/y11/y12/	1540.53	1545.86	8086	3	3086.4	1	0	0
2	8657	SunS_13_OVCAR3_HILIC_IntactGlycopeptide_F2.8657.8657.5.0.dta	4663.88	5	35.29	DCVECLLLHSGKPDNQTCHSLCR	N2H9F0S0	9-2-0-0-0	0	0	2	0	1	0	1	9	b2/b3/b4/b12/	y1/y4/y5/y6/y7/	1864.63	2799.25	12380	5	4663.88	1	0	0
2	8664	SunS_13_OVCAR3_HILIC_IntactGlycopeptide_F2.8664.8664.4.0.dta	4663.88	4	35.31	DCVECLLLHSGKPDNQTCHSLCR	N2H9F0S0	9-2-0-0-0	-2	0	2	0	1	0	1	17	b2/b3/b4/b5/b6/b7/b8/b9/b10/b12/b14/	y1/y3/y4/y5/y7/y11/	1864.63	2799.25	#N/A	4	4663.88	1	0	0
2	8680	SunS_13_OVCAR3_HILIC_IntactGlycopeptide_F2.8680.8680.4.0.dta	4501.82	4	35.36	DCVECLLLHSGKPDNQTCHSLCR	N2H8F0S0	8-2-0-0-0	0	0	2	0	1	0	1	20	b2/b3/b4/b5/b6/b7/b8/b9/b10/b12/b14/	y1/y2/y3/y4/y5/y6/y7/y9/y11/	1702.58	2799.24	12434	4	4501.83	1	0	0
2	8681	SunS_13_OVCAR3_HILIC_IntactGlycopeptide_F2.8681.8681.5.0.dta	4501.84	5	35.36	DCVECLLLHSGKPDNQTCHSLCR	N2H8F0S0	8-2-0-0-0	0	0	2	0	1	0	1	19	b2/b3/b4/b5/b6/b7/b8/b9/b10/b12/b14/	y1/y3/y4/y5/y6/y7/y9/y11/	1702.58	2799.26	11653	5	4501.83	1	0	0
2	8698	SunS_13_OVCAR3_HILIC_IntactGlycopeptide_F2.8698.8698.3.0.dta	3502.51	3	35.41	ANTSALAVPSPVSNSASAR	N2H8F0S0	8-2-0-0-0	-2	0	2	1	0	1	0	19	b2/b3/b5/b6/b7/b8/	y1/y3/y6/y7/y8/y9/y10/y11/y12/y13/y14/y15/y16/	1702.58	1799.93	1128	3	3502.5	1	1	1
2	8707	SunS_13_OVCAR3_HILIC_IntactGlycopeptide_F2.8707.8707.3.0.dta	3502.5	3	35.43	ANTSALAVPSPVSNSASAR	N2H8F0S0	8-2-0-0-0	-1	0	2	1	0	1	0	19	b3/b6/b7/b8/	y1/y3/y4/y5/y6/y7/y8/y9/y10/y11/y12/y13/y14/y15/y16/	1702.58	1799.92	610	3	3502.5	1	1	1
2	8711	SunS_13_OVCAR3_HILIC_IntactGlycopeptide_F2.8711.8711.4.0.dta	4339.78	4	35.45	DCVECLLLHSGKPDNQTCHSLCR	N2H7F0S0	7-2-0-0-0	0	0	2	0	1	0	1	15	b2/b3/b4/b5/b6/b7/b8/b9/b12/	y1/y4/y5/y6/y7/y11/	1540.53	2799.26	13461	4	4339.77	1	0	0
2	8729	SunS_13_OVCAR3_HILIC_IntactGlycopeptide_F2.8729.8729.5.0.dta	4339.76	5	35.5	DCVECLLLHSGKPDNQTCHSLCR	N2H7F0S0	7-2-0-0-0	0	0	2	0	1	0	1	11	b2/b3/b4/b5/b6/b7/b8/b9/	y1/y4/y5/	1540.53	2799.23	#N/A	5	4340.77	0	1	0
2	8739	SunS_13_OVCAR3_HILIC_IntactGlycopeptide_F2.8739.8739.4.0.dta	4177.71	4	35.53	DCVECLLLHSGKPDNQTCHSLCR	N2H6F0S0	6-2-0-0-0	-1	0	2	0	1	0	1	18	b2/b3/b4/b5/b6/b7/b9/b12/b14/	y1/y2/y4/y5/y6/y7/y8/y9/y11/	1378.48	2799.24	12202	4	4177.72	1	0	0
2	8757	SunS_13_OVCAR3_HILIC_IntactGlycopeptide_F2.8757.8757.3.0.dta	2878.2	3	35.59	DSLSINATNIK	N2H8F0S0	8-2-0-0-0	0	0	2	1	0	1	0	9	b4/b7/b10/	y1/y3/y4/y5/y6/y8/	1702.58	1175.62	1338	3	2878.21	1	1	1
2	8801	SunS_13_OVCAR3_HILIC_IntactGlycopeptide_F2.8801.8801.3.0.dta	2716.14	3	35.71	DSLSINATNIK	N2H7F0S0	7-2-0-0-0	-1	0	2	1	0	1	0	8	b4/b7/b10/	y1/y3/y4/y5/y6/	1540.53	1175.62	2923	3	2716.16	1	1	1
2	9116	SunS_13_OVCAR3_HILIC_IntactGlycopeptide_F2.9116.9116.3.0.dta	2833.17	3	36.69	TCDWLPKPNMSASCK	N2H3F1S0	3-2-0-1-0	0	0	3	0	1	1	1	9	b2/b3/b4/b5/	y2/y3/y5/y8/y10/	1038.38	1794.8	#N/A	3	2833.17	1	0	0
2	9167	SunS_13_OVCAR3_HILIC_IntactGlycopeptide_F2.9167.9167.3.0.dta	2687.12	3	36.88	TCDWLPKPNMSASCK	N2H3F0S0	3-2-0-0-0	0	0	3	1	1	0	1	11	b2/b3/b4/b5/	y2/y3/y4/y5/y6/y8/y10/	892.317	1794.8	#N/A	3	2687.11	1	0	0
2	9190	SunS_13_OVCAR3_HILIC_IntactGlycopeptide_F2.9190.9190.3.0.dta	2833.18	3	36.95	TCDWLPKPNMSASCK	N2H3F1S0	3-2-0-1-0	0	0	4	1	1	1	1	8	b2/b3/b4/b5/	y2/y8/y10/y11/	1038.38	1794.81	#N/A	3	2833.17	1	0	0
2	9194	SunS_13_OVCAR3_HILIC_IntactGlycopeptide_F2.9194.9194.3.0.dta	2595.15	3	36.97	NHSIFLADINQER	N2H3F1S0	3-2-0-1-0	-1	0	4	1	1	1	1	16	b2/b3/b4/b5/b6/	y1/y2/y4/y5/y6/y7/y8/y9/y10/y11/y12/	1038.38	1556.78	133	3	2595.16	1	1	1
2	9290	SunS_13_OVCAR3_HILIC_IntactGlycopeptide_F2.9290.9290.4.0.dta	4862	4	37.27	DGSDEPGTAACPNGSFHCTNTGYKPLYIPSNR	N2H6F0S0	6-2-0-0-0	0	0	2	0	1	0	1	16	b2/b3/b4/b5/b8/b9/b10/b11/	y1/y4/y5/y6/y7/y8/y9/y11/	1378.48	3483.52	#N/A	4	4862.01	1	0	0
2	9456	SunS_13_OVCAR3_HILIC_IntactGlycopeptide_F2.9456.9456.3.0.dta	3470.42	3	37.92	VYCNLSAAHTFEDLK	N2H8F0S0	8-2-0-0-0	-2	0	4	1	1	1	1	8		y1/y2/y5/y6/y7/y8/y9/y10/	1702.58	1767.84	#N/A	3	3470.42	1	0	0
2	9561	SunS_13_OVCAR3_HILIC_IntactGlycopeptide_F2.9561.9561.3.0.dta	3607.43	3	38.3	TFNLNTTEVEPCR	N2H10F0S0	10-2-0-0-0	-1	0	4	1	1	1	1	13	b2/b3/b4/	y1/y3/y4/y5/y6/y7/y8/y9/y10/y11/	2026.69	1580.74	359	3	3607.42	1	1	1
2	9620	SunS_13_OVCAR3_HILIC_IntactGlycopeptide_F2.9620.9620.3.0.dta	3283.32	3	38.54	TFNLNTTEVEPCR	N2H8F0S0	8-2-0-0-0	-1	0	4	1	1	1	1	14	b2/b3/b4/b6/b8/	y1/y3/y4/y5/y6/y7/y8/y9/y11/	1702.58	1580.74	262	3	3283.32	1	1	1
2	9745	SunS_13_OVCAR3_HILIC_IntactGlycopeptide_F2.9745.9745.3.0.dta	3722.5	3	38.94	CNMINGTDGDSFHPLITK	N2H8F0S0	8-2-0-0-0	-2	0	4	1	1	1	1	15	b2/b3/b4/b13/	y1/y2/y3/y5/y6/y7/y8/y10/y11/y13/y14/	1702.58	2019.92	#N/A	3	3722.51	1	0	0
2	9801	SunS_13_OVCAR3_HILIC_IntactGlycopeptide_F2.9801.9801.3.0.dta	3631.36	3	39.14	DTCTQECSYFNITK	N2H9F0S0	9-2-0-0-0	-2	0	2	1	0	1	0	7	b2/b3/b12/	y1/y2/y3/y5/	1864.63	1766.73	3199	3	3631.37	1	1	1
2	9810	SunS_13_OVCAR3_HILIC_IntactGlycopeptide_F2.9810.9810.4.0.dta	4361.81	4	39.17	SSCGKENTSDPSLVIAFGR	N6H6F1S0	6-6-0-1-0	-1	0	3	0	1	1	1	8	b10/	y1/y2/y3/y4/y5/y6/y9/	2336.85	2024.96	4090	4	4361.82	1	1	1
2	9821	SunS_13_OVCAR3_HILIC_IntactGlycopeptide_F2.9821.9821.3.0.dta	2967.19	3	39.21	DLNETIHYMYK	N2H7F0S0	7-2-0-0-0	0	0	4	1	1	1	1	7		y1/y2/y3/y4/y5/y7/y8/	1540.53	1426.66	#N/A	3	2967.2	1	0	0
2	9899	SunS_13_OVCAR3_HILIC_IntactGlycopeptide_F2.9899.9899.3.0.dta	2967.18	3	39.47	DLNETIHYMYK	N2H7F0S0	7-2-0-0-0	-1	0	4	1	1	1	1	8	b7/	y1/y2/y4/y5/y6/y7/y8/	1540.53	1426.66	#N/A	3	2966.18	0	1	0
2	9902	SunS_13_OVCAR3_HILIC_IntactGlycopeptide_F2.9902.9902.3.0.dta	2805.15	3	39.48	DLNETIHYMYK	N2H6F0S0	6-2-0-0-0	0	0	4	1	1	1	1	16	b2/b3/b4/b5/b7/b8/b9/	y1/y2/y3/y4/y5/y6/y7/y8/y9/	1378.48	1426.67	#N/A	3	2805.15	1	0	0
2	9918	SunS_13_OVCAR3_HILIC_IntactGlycopeptide_F2.9918.9918.4.0.dta	4142.75	4	39.52	SSCGKENTSDPSLVIAFGR	N5H5F2S0	5-5-0-2-0	-2	0	3	0	1	1	1	7		y2/y3/y4/y5/y6/y9/y11/	2117.78	2024.97	3073	4	4142.75	1	1	1
2	9932	SunS_13_OVCAR3_HILIC_IntactGlycopeptide_F2.9932.9932.3.0.dta	3543.56	3	39.56	NYAIIKPIGFNETAK	N2H9F0S0	9-2-0-0-0	0	0	4	1	1	1	1	10	b2/b3/b4/b5/	y1/y2/y3/y7/y9/y10/	1864.63	1678.93	2251	3	3543.56	1	1	1
2	9945	SunS_13_OVCAR3_HILIC_IntactGlycopeptide_F2.9945.9945.3.0.dta	3145.21	3	39.6	DTCTQECSYFNITK	N2H6F0S0	6-2-0-0-0	0	0	2	1	0	1	0	18	b2/b3/b4/b5/b6/b7/b12/	y1/y2/y3/y4/y5/y6/y7/y8/y9/y10/y11/	1378.48	1766.73	2903	3	3145.21	1	1	1
2	9951	SunS_13_OVCAR3_HILIC_IntactGlycopeptide_F2.9951.9951.3.0.dta	3381.5	3	39.62	NYAIIKPIGFNETAK	N2H8F0S0	8-2-0-0-0	-1	0	4	1	1	1	1	18	b2/b3/b4/b5/b6/b7/b8/b10/	y1/y2/y3/y4/y5/y7/y8/y9/y10/y11/	1702.58	1678.91	1380	3	3381.5	1	1	1
2	9964	SunS_13_OVCAR3_HILIC_IntactGlycopeptide_F2.9964.9964.4.0.dta	3381.49	4	39.65	NYAIIKPIGFNETAK	N2H8F0S0	8-2-0-0-0	0	0	4	1	1	1	1	6	b2/b3/b4/b5/	y1/y9/	1702.58	1678.91	2601	4	3381.5	1	1	1
2	9993	SunS_13_OVCAR3_HILIC_IntactGlycopeptide_F2.9993.9993.4.0.dta	3996.69	4	39.74	SSCGKENTSDPSLVIAFGR	N5H5F1S0	5-5-0-1-0	0	0	4	1	1	1	1	13	b6/b8/b10/	y2/y3/y4/y5/y6/y9/y10/y11/y12/y14/	1971.72	2024.98	2432	4	3996.69	1	1	1
2	10010	SunS_13_OVCAR3_HILIC_IntactGlycopeptide_F2.10010.10010.4.0.dta	3896.65	4	39.79	QSWFPPPPPGYNASSSTGTRR	N4H4F1S0	4-4-0-1-0	-2	0	1	0	1	0	0	6	b7/b11/b15/	y1/y7/y13/	1606.59	2290.06	11840	4	3896.66	1	0	0
2	10011	SunS_13_OVCAR3_HILIC_IntactGlycopeptide_F2.10011.10011.3.0.dta	3219.44	3	39.79	NYAIIKPIGFNETAK	N2H7F0S0	7-2-0-0-0	-1	0	4	1	1	1	1	16	b2/b3/b4/b5/b6/b7/b8/	y1/y2/y3/y4/y5/y7/y9/y10/y11/	1540.53	1678.91	870	3	3219.45	1	1	1
2	10032	SunS_13_OVCAR3_HILIC_IntactGlycopeptide_F2.10032.10032.3.0.dta	3145.22	3	39.86	DTCTQECSYFNITK	N2H6F0S0	6-2-0-0-0	-1	0	2	1	0	1	0	11	b2/b3/b4/b6/	y1/y2/y3/y4/y5/y7/y9/	1378.48	1766.74	1916	3	3145.21	1	1	1
2	10036	SunS_13_OVCAR3_HILIC_IntactGlycopeptide_F2.10036.10036.3.0.dta	3381.49	3	39.88	NYAIIKPIGFNETAK	N2H8F0S0	8-2-0-0-0	0	0	4	1	1	1	1	12	b2/b3/b4/b5/b8/b14/	y1/y2/y3/y4/y9/y10/	1702.58	1678.91	1089	3	3381.5	1	1	1
2	10165	SunS_13_OVCAR3_HILIC_IntactGlycopeptide_F2.10165.10165.3.0.dta	3673.55	3	40.35	LQGLENWGQDPGVSANASK	N2H8F0S0	8-2-0-0-0	-1	0	2	0	1	0	1	14	b2/b3/b4/b5/b6/b7/b10/	y2/y3/y5/y6/y9/y10/y12/	1702.58	1970.96	1079	3	3673.53	1	1	1
2	10214	SunS_13_OVCAR3_HILIC_IntactGlycopeptide_F2.10214.10214.3.0.dta	3511.49	3	40.52	LQGLENWGQDPGVSANASK	N2H7F0S0	7-2-0-0-0	-1	0	4	1	1	1	1	18	b2/b3/b5/b6/b7/b8/b9/b10/b11/b13/	y1/y2/y3/y4/y6/y9/y10/y12/	1540.53	1970.96	656	3	3511.48	1	1	1
2	10224	SunS_13_OVCAR3_HILIC_IntactGlycopeptide_F2.10224.10224.3.0.dta	3011.23	3	40.56	VINETWAWK	N2H9F0S0	9-2-0-0-0	0	0	3	1	0	1	1	8	b2/b7/b8/	y1/y2/y3/y4/y5/	1864.63	1146.59	1589	3	3011.23	1	1	1
2	10260	SunS_13_OVCAR3_HILIC_IntactGlycopeptide_F2.10260.10260.3.0.dta	3349.43	3	40.67	LQGLENWGQDPGVSANASK	N2H6F0S0	6-2-0-0-0	0	0	4	1	1	1	1	23	b2/b3/b4/b5/b6/b7/b8/b9/b10/b11/b13/	y1/y2/y3/y4/y5/y6/y9/y10/y11/y12/y13/y14/	1378.48	1970.95	1068	3	3349.43	1	1	1
2	10277	SunS_13_OVCAR3_HILIC_IntactGlycopeptide_F2.10277.10277.3.0.dta	3742.63	3	40.73	TVLENSTSYEEAKNLLTK	N2H8F0S0	8-2-0-0-0	-2	0	4	1	1	1	1	13	b2/b3/	y2/y3/y4/y5/y6/y7/y8/y9/y11/y12/y13/	1702.58	2040.05	10093	3	3742.63	1	0	0
2	10319	SunS_13_OVCAR3_HILIC_IntactGlycopeptide_F2.10319.10319.3.0.dta	3187.39	3	40.91	LQGLENWGQDPGVSANASK	N2H5F0S0	5-2-0-0-0	-1	0	2	0	1	0	1	15	b2/b3/b5/b6/b7/b9/b10/	y1/y2/y3/y4/y6/y9/y12/y13/	1216.42	1970.97	1131	3	3187.38	1	1	1
2	10394	SunS_13_OVCAR3_HILIC_IntactGlycopeptide_F2.10394.10394.3.0.dta	2640.15	3	41.2	AGPNGTLFVADAYK	N2H5F0S0	5-2-0-0-0	0	0	3	1	1	1	0	13	b8/b9/b12/	y1/y2/y3/y4/y5/y6/y7/y8/y9/y10/	1216.42	1423.72	230	3	2640.15	1	1	1
2	10402	SunS_13_OVCAR3_HILIC_IntactGlycopeptide_F2.10402.10402.3.0.dta	2525.08	3	41.23	VINETWAWK	N2H6F0S0	6-2-0-0-0	-1	0	2	1	0	1	0	9	b2/b6/b7/	y2/y3/y4/y5/y6/y7/	1378.48	1146.6	1665	3	2525.07	1	1	1
2	10424	SunS_13_OVCAR3_HILIC_IntactGlycopeptide_F2.10424.10424.3.0.dta	4123.74	3	41.31	TTLVDNNTWNNSHIALVGK	N2H10F0S0	10-2-0-0-0	-1	0	4	1	1	1	1	11	b2/b3/	y2/y3/y4/y5/y6/y7/y9/y11/y15/	2026.69	2097.06	2616	3	4123.76	1	1	1
2	10436	SunS_13_OVCAR3_HILIC_IntactGlycopeptide_F2.10436.10436.4.0.dta	3961.71	4	41.35	TTLVDNNTWNNSHIALVGK	N2H9F0S0	9-2-0-0-0	-1	0	4	1	1	1	1	20	b2/b3/b4/b5/b6/b7/b8/	y1/y2/y3/y4/y5/y6/y7/y8/y9/y10/y11/y14/y15/	1864.63	2097.08	3189	4	3961.71	1	1	1
2	10437	SunS_13_OVCAR3_HILIC_IntactGlycopeptide_F2.10437.10437.4.0.dta	4389.83	4	41.36	DLNEDDHHHECLNVTQLLK	N4H5F1S1	5-4-1-1-0	-2	0	3	0	1	1	1	7	b7/b8/b9/b10/	y3/y5/y6/	2059.73	2330.1	13476	4	4389.82	1	1	1
2	10466	SunS_13_OVCAR3_HILIC_IntactGlycopeptide_F2.10466.10466.3.0.dta	3799.65	3	41.47	TTLVDNNTWNNSHIALVGK	N2H8F0S0	8-2-0-0-0	-2	0	4	1	1	1	1	16	b2/b3/b4/b5/b6/b8/	y2/y3/y4/y5/y6/y7/y8/y9/y11/y15/	1702.58	2097.07	2017	3	3799.65	1	1	1
2	10475	SunS_13_OVCAR3_HILIC_IntactGlycopeptide_F2.10475.10475.3.0.dta	3961.7	3	41.51	TTLVDNNTWNNSHIALVGK	N2H9F0S0	9-2-0-0-0	-2	0	4	1	1	1	1	21	b2/b3/b4/b5/b6/b7/b8/b14/	y1/y2/y3/y4/y5/y6/y7/y8/y9/y10/y11/y15/y17/	1864.63	2097.07	3024	3	3961.7	1	1	1
2	10501	SunS_13_OVCAR3_HILIC_IntactGlycopeptide_F2.10501.10501.4.0.dta	3961.71	4	41.61	TTLVDNNTWNNSHIALVGK	N2H9F0S0	9-2-0-0-0	-2	0	3	1	1	0	1	12	b2/b3/b4/	y1/y2/y3/y4/y5/y6/y8/y9/y15/	1864.63	2097.07	2784	4	3961.71	1	1	1
2	10521	SunS_13_OVCAR3_HILIC_IntactGlycopeptide_F2.10521.10521.3.0.dta	2462.1	3	41.68	AGPNGTLFVADAYK	N2H3F1S0	3-2-0-1-0	0	0	2	1	0	1	0	8		y2/y3/y5/y6/y7/y8/y9/y10/	1038.38	1423.72	815	3	2462.1	1	1	1
2	10524	SunS_13_OVCAR3_HILIC_IntactGlycopeptide_F2.10524.10524.3.0.dta	3015.42	3	41.7	ALAYGEKNLTFEGPLPEK	N2H3F1S0	3-2-0-1-0	0	0	4	1	1	1	1	18	b2/b3/b6/b7/b8/b13/b15/	y1/y2/y3/y5/y6/y7/y8/y9/y10/y11/y14/	1038.38	1977.05	784	3	3015.41	1	1	1
2	10718	SunS_13_OVCAR3_HILIC_IntactGlycopeptide_F2.10718.10718.4.0.dta	4413.77	4	42.42	HNNDTQHIWESDSNEFSVIADPR	N2H8F0S0	8-2-0-0-0	0	0	1	0	0	0	1	10	b2/b3/	y1/y2/y3/y4/y5/y6/y7/y8/	1702.58	2711.18	1413	4	4413.78	1	1	1
2	10728	SunS_13_OVCAR3_HILIC_IntactGlycopeptide_F2.10728.10728.4.0.dta	4575.87	4	42.45	HNNDTQHIWESDSNEFSVIADPR	N2H9F0S0	9-2-0-0-0	-2	0	1	0	0	0	1	8	b3/	y1/y2/y4/y5/y6/y7/y8/	1864.63	2711.23	#N/A	2	2288.45	0	1	0
2	11034	SunS_13_OVCAR3_HILIC_IntactGlycopeptide_F2.11034.11034.4.0.dta	4467.95	4	43.74	INTTADEKDPTNPFRFPNIGVEK	N2H9F0S0	9-2-0-0-0	-3	0	2	0	1	0	1	7	b2/b9/	y2/y4/y7/y11/y14/	1864.63	2603.31	9195	4	4467.95	1	1	1
2	11228	SunS_13_OVCAR3_HILIC_IntactGlycopeptide_F2.11228.11228.3.0.dta	3399.37	3	44.63	NMSFVNDLTVTQDGR	N2H8F0S0	8-2-0-0-0	-2	0	3	1	1	1	0	14	b2/	y1/y2/y3/y4/y5/y6/y7/y8/y9/y10/y11/y12/y13/	1702.58	1696.79	#N/A	3	3399.38	1	0	0
2	11229	SunS_13_OVCAR3_HILIC_IntactGlycopeptide_F2.11229.11229.5.0.dta	4726.04	5	44.63	VYCNLSAAHTFEDLKNEIKNPEIR	N2H9F0S0	9-2-0-0-0	-2	0	2	0	1	0	1	7	b9/	y1/y2/y4/y5/y9/y11/	1864.63	2861.41	5874	5	4726.07	1	1	1
2	11244	SunS_13_OVCAR3_HILIC_IntactGlycopeptide_F2.11244.11244.4.0.dta	4726.07	4	44.7	VYCNLSAAHTFEDLKNEIKNPEIR	N2H9F0S0	9-2-0-0-0	-2	0	2	0	1	0	1	8	b5/b9/	y1/y2/y4/y5/y6/y9/	1864.63	2861.43	11659	4	4726.07	1	1	1
2	11278	SunS_13_OVCAR3_HILIC_IntactGlycopeptide_F2.11278.11278.3.0.dta	3983.64	3	44.84	ALQWNAGSGGLPENETTFAR	N2H9F0S0	9-2-0-0-0	-2	0	3	1	0	1	1	15	b2/b3/b4/b5/b6/b11/	y1/y2/y3/y4/y5/y6/y9/y12/y14/	1864.63	2119.01	948	3	3983.67	1	1	1
2	11297	SunS_13_OVCAR3_HILIC_IntactGlycopeptide_F2.11297.11297.3.0.dta	3237.33	3	44.91	NMSFVNDLTVTQDGR	N2H7F0S0	7-2-0-0-0	-1	0	3	1	1	1	0	16	b2/b3/b4/b7/	y2/y3/y4/y5/y6/y7/y8/y9/y10/y11/y12/y13/	1540.53	1696.8	#N/A	3	3236.36	0	1	0
2	11335	SunS_13_OVCAR3_HILIC_IntactGlycopeptide_F2.11335.11335.3.0.dta	3075.27	3	45.05	NMSFVNDLTVTQDGR	N2H6F0S0	6-2-0-0-0	0	0	3	1	1	1	0	16	b2/b3/b5/b6/	y2/y3/y4/y5/y6/y7/y8/y9/y10/y11/y12/y13/	1378.48	1696.8	327	3	3075.28	1	0	0
2	11389	SunS_13_OVCAR3_HILIC_IntactGlycopeptide_F2.11389.11389.3.0.dta	3075.27	3	45.31	NMSFVNDLTVTQDGR	N2H6F0S0	6-2-0-0-0	0	0	3	1	1	1	0	20	b2/b3/b4/b5/b7/b10/	y1/y2/y3/y4/y5/y6/y7/y8/y9/y10/y11/y12/y13/y14/	1378.48	1696.79	246	3	3075.28	1	0	0
2	11579	SunS_13_OVCAR3_HILIC_IntactGlycopeptide_F2.11579.11579.3.0.dta	3915.54	3	46.22	YHYNGSLMDGTLFDSSYSR	N2H8F0S0	8-2-0-0-0	0	0	4	1	1	1	1	23	b1/b2/b3/b4/b5/b8/b9/b12/	y1/y2/y3/y4/y5/y6/y7/y8/y9/y10/y11/y12/y13/y15/y17/	1702.58	2212.96	#N/A	3	3914.58	0	1	0
2	11580	SunS_13_OVCAR3_HILIC_IntactGlycopeptide_F2.11580.11580.4.0.dta	3915.54	4	46.22	YHYNGSLMDGTLFDSSYSR	N2H8F0S0	8-2-0-0-0	0	0	2	0	1	0	1	15	b1/b2/b3/	y1/y2/y3/y4/y5/y6/y7/y8/y10/y11/y12/y17/	1702.58	2212.96	#N/A	4	3915.54	1	0	0
2	11610	SunS_13_OVCAR3_HILIC_IntactGlycopeptide_F2.11610.11610.4.0.dta	4147.73	4	46.36	KLCPDCPLLAPLNDSR	N5H6F0S1	6-5-1-0-0	0	0	4	1	1	1	1	12	b1/b3/b5/b6/b7/b8/b9/b10/	y1/y2/y6/y7/	2278.81	1868.92	5893	4	4147.75	1	1	1
2	11638	SunS_13_OVCAR3_HILIC_IntactGlycopeptide_F2.11638.11638.3.0.dta	3915.53	3	46.47	YHYNGSLMDGTLFDSSYSR	N2H8F0S0	8-2-0-0-0	-2	0	3	0	1	1	1	11	b1/b2/b3/	y2/y5/y6/y7/y10/y11/y12/y15/	1702.58	2212.95	#N/A	3	3915.55	1	0	0
2	11672	SunS_13_OVCAR3_HILIC_IntactGlycopeptide_F2.11672.11672.4.0.dta	4147.76	4	46.61	KLCPDCPLLAPLNDSR	N5H6F0S1	6-5-1-0-0	0	0	4	1	1	1	1	11	b1/b3/b5/b6/b8/b9/b10/	y1/y2/y3/y6/	2278.81	1868.95	4845	4	4147.75	1	1	1
2	11702	SunS_13_OVCAR3_HILIC_IntactGlycopeptide_F2.11702.11702.4.0.dta	3782.61	4	46.74	KLCPDCPLLAPLNDSR	N4H5F0S1	5-4-1-0-0	-1	0	4	1	1	1	1	8	b1/b3/b5/b6/b8/b9/b10/	y2/	1913.68	1868.93	4671	4	3782.62	1	1	1
2	11725	SunS_13_OVCAR3_HILIC_IntactGlycopeptide_F2.11725.11725.3.0.dta	3245.39	3	46.84	IFIFNQTGIEAK	N2H9F0S0	9-2-0-0-0	-1	0	4	1	1	1	1	11	b2/b3/	y1/y2/y3/y5/y6/y7/y8/y9/y10/	1864.63	1380.76	452	3	3245.39	1	1	1
2	11730	SunS_13_OVCAR3_HILIC_IntactGlycopeptide_F2.11730.11730.4.0.dta	4147.74	4	46.87	KLCPDCPLLAPLNDSR	N5H6F0S1	6-5-1-0-0	-2	0	2	0	0	1	1	7	b3/b5/b6/b8/b9/b10/	y2/	2278.81	1868.93	6684	4	4147.75	1	1	1
2	11750	SunS_13_OVCAR3_HILIC_IntactGlycopeptide_F2.11750.11750.3.0.dta	3083.33	3	46.96	IFIFNQTGIEAK	N2H8F0S0	8-2-0-0-0	0	0	4	1	1	1	1	11	b2/b3/	y1/y2/y3/y5/y6/y7/y8/y9/y10/	1702.58	1380.75	1067	3	3083.34	1	1	1
2	11759	SunS_13_OVCAR3_HILIC_IntactGlycopeptide_F2.11759.11759.4.0.dta	3782.62	4	47	KLCPDCPLLAPLNDSR	N4H5F0S1	5-4-1-0-0	0	0	3	0	1	1	1	9	b1/b3/b5/b6/b8/b9/b10/	y1/y2/	1913.68	1868.94	4394	4	3782.62	1	1	1
2	12042	SunS_13_OVCAR3_HILIC_IntactGlycopeptide_F2.12042.12042.3.0.dta	3877.55	3	48.41	ELGVVMYNCSCLAR	N4H5F2S1	5-4-1-2-0	-2	0	3	1	1	1	0	6	b3/b4/b5/	y1/y4/y6/	2205.79	1671.75	#N/A	3	3877.56	1	0	0
2	12075	SunS_13_OVCAR3_HILIC_IntactGlycopeptide_F2.12075.12075.3.0.dta	3528.43	3	48.58	ELGVVMYNCSCLAR	N3H5F1S1	5-3-1-1-0	0	0	2	1	0	1	0	8	b3/b4/b5/	y1/y2/y5/y6/y9/	1856.66	1671.77	#N/A	3	3528.42	1	0	0
2	12089	SunS_13_OVCAR3_HILIC_IntactGlycopeptide_F2.12089.12089.3.0.dta	3544.41	3	48.66	ELGVVMYNCSCLAR	N3H6F0S1	6-3-1-0-0	0	0	3	1	1	1	0	11	b2/b3/b4/b5/	y1/y2/y5/y6/y8/y9/y10/	1872.65	1671.76	4784	3	3544.42	1	0	0
2	12115	SunS_13_OVCAR3_HILIC_IntactGlycopeptide_F2.12115.12115.3.0.dta	3366.37	3	48.81	ELGVVMYNCSCLAR	N3H4F1S1	4-3-1-1-0	0	0	2	1	0	1	0	7	b3/b4/b5/	y1/y5/y6/y9/	1694.6	1671.77	#N/A	3	3366.37	1	0	0
2	12187	SunS_13_OVCAR3_HILIC_IntactGlycopeptide_F2.12187.12187.4.0.dta	4726.95	4	49.16	EDAQINTTIGSVTAQDPDAAR	N5H5F1S2	5-5-2-1-0	-2	0	2	0	0	1	1	19	b4/b5/b7/b10/b11/b14/	y1/y3/y5/y6/y7/y8/y9/y10/y11/y12/y13/y14/y15/	2553.91	2173.04	#N/A	2	2363.97	0	1	0
2	12201	SunS_13_OVCAR3_HILIC_IntactGlycopeptide_F2.12201.12201.4.0.dta	4523.86	4	49.23	EDAQINTTIGSVTAQDPDAAR	N4H5F1S2	5-4-2-1-0	-3	0	2	0	0	1	1	19	b4/b5/b7/b8/b10/b11/b14/	y1/y3/y5/y6/y7/y8/y9/y10/y11/y12/y13/y14/	2350.83	2173.02	1179	4	4523.88	1	1	1
2	12260	SunS_13_OVCAR3_HILIC_IntactGlycopeptide_F2.12260.12260.4.0.dta	4523.87	4	49.49	EDAQINTTIGSVTAQDPDAAR	N4H5F1S2	5-4-2-1-0	-2	0	2	0	0	1	1	19	b4/b5/b7/b9/b10/b11/b14/	y1/y3/y5/y6/y7/y8/y9/y10/y11/y12/y13/y14/	2350.83	2173.04	1011	4	4523.87	1	1	1
2	12349	SunS_13_OVCAR3_HILIC_IntactGlycopeptide_F2.12349.12349.4.0.dta	4523.87	4	49.88	EDAQINTTIGSVTAQDPDAAR	N4H5F1S2	5-4-2-1-0	-2	0	2	0	0	1	1	15	b4/b10/b11/b14/	y1/y3/y5/y6/y8/y9/y10/y11/y12/y13/y14/	2350.83	2173.04	#N/A	2	2262.44	0	1	0
2	12356	SunS_13_OVCAR3_HILIC_IntactGlycopeptide_F2.12356.12356.4.0.dta	3772.53	4	49.91	EPGSNVTMSVDAECVPMVR	N3H4F1S1	4-3-1-1-0	-1	0	2	0	1	0	1	14		y1/y2/y3/y4/y5/y6/y7/y8/y9/y10/y11/y12/y13/y14/	1694.6	2077.93	#N/A	4	3772.54	1	0	0
2	12370	SunS_13_OVCAR3_HILIC_IntactGlycopeptide_F2.12370.12370.3.0.dta	3772.54	3	49.96	EPGSNVTMSVDAECVPMVR	N3H4F1S1	4-3-1-1-0	-1	0	2	0	0	1	1	11		y1/y4/y5/y6/y7/y8/y9/y10/y11/y12/y13/	1694.6	2077.94	#N/A	3	3772.55	1	0	0
2	12469	SunS_13_OVCAR3_HILIC_IntactGlycopeptide_F2.12469.12469.4.0.dta	4560.9	4	50.39	LGGFTQENNTIDSGELDIGR	N5H6F1S1	6-5-1-1-0	-2	0	3	0	1	1	1	8	b8/b9/	y2/y3/y4/y5/y8/y9/	2424.87	2136.03	2957	4	4560.89	1	1	1
2	12489	SunS_13_OVCAR3_HILIC_IntactGlycopeptide_F2.12489.12489.4.0.dta	3567.57	4	50.49	NGSSIVDLSPLIHR	N4H5F1S1	5-4-1-1-0	0	0	4	1	1	1	1	6		y1/y6/y7/y8/y9/y11/	2059.73	1507.84	4732	4	3567.56	1	1	1
2	12518	SunS_13_OVCAR3_HILIC_IntactGlycopeptide_F2.12518.12518.3.0.dta	3129.27	3	50.63	DIYTFDGALNK	N3H6F0S1	6-3-1-0-0	0	0	2	1	0	1	0	18	b2/b3/b4/b5/b6/b7/b8/b9/b10/	y1/y2/y3/y4/y5/y6/y7/y9/y10/	1872.65	1256.62	1811	3	3129.27	1	1	1
2	12540	SunS_13_OVCAR3_HILIC_IntactGlycopeptide_F2.12540.12540.3.0.dta	3113.28	3	50.74	DIYTFDGALNK	N3H5F1S1	5-3-1-1-0	-1	0	2	1	0	1	0	7	b2/b4/b8/b9/	y2/y5/y9/	1856.66	1256.63	#N/A	3	3112.27	0	1	0
2	12566	SunS_13_OVCAR3_HILIC_IntactGlycopeptide_F2.12566.12566.3.0.dta	3129.26	3	50.89	DIYTFDGALNK	N3H6F0S1	6-3-1-0-0	0	0	2	1	0	1	0	8	b2/b3/b4/b8/b9/	y2/y5/y7/	1872.65	1256.61	2817	3	3129.27	1	1	1
2	12620	SunS_13_OVCAR3_HILIC_IntactGlycopeptide_F2.12620.12620.4.0.dta	4109.79	4	51.18	ISFLIGSDSTHVIPGESPFNK	N2H9F0S0	9-2-0-0-0	0	0	2	0	1	0	1	13	b2/b3/b4/b5/b11/b12/b13/b16/	y2/y4/y8/y9/y11/	1864.63	2245.16	2925	4	4109.79	1	1	1
2	12628	SunS_13_OVCAR3_HILIC_IntactGlycopeptide_F2.12628.12628.4.0.dta	3947.72	4	51.22	ISFLIGSDSTHVIPGESPFNK	N2H8F0S0	8-2-0-0-0	-1	0	2	0	1	0	1	13	b2/b3/b4/b5/b11/b12/b13/b16/	y2/y4/y8/y9/y11/	1702.58	2245.14	2423	4	3947.74	1	1	1
2	12631	SunS_13_OVCAR3_HILIC_IntactGlycopeptide_F2.12631.12631.3.0.dta	4109.78	3	51.24	ISFLIGSDSTHVIPGESPFNK	N2H9F0S0	9-2-0-0-0	0	0	2	0	1	0	1	12	b3/b4/b11/b12/b13/b16/b17/	y4/y5/y8/y9/y11/	1864.63	2245.14	2254	3	4109.79	1	1	1
2	12637	SunS_13_OVCAR3_HILIC_IntactGlycopeptide_F2.12637.12637.3.0.dta	3947.72	3	51.27	ISFLIGSDSTHVIPGESPFNK	N2H8F0S0	8-2-0-0-0	-1	0	2	0	1	0	1	16	b2/b3/b4/b5/b8/b11/b12/b13/b16/b17/	y2/y4/y5/y8/y9/y11/	1702.58	2245.14	1974	3	3947.74	1	1	1
2	12673	SunS_13_OVCAR3_HILIC_IntactGlycopeptide_F2.12673.12673.4.0.dta	3947.72	4	51.48	ISFLIGSDSTHVIPGESPFNK	N2H8F0S0	8-2-0-0-0	-1	0	2	0	1	0	1	15	b2/b3/b4/b5/b8/b11/b12/b13/	y1/y2/y4/y5/y8/y9/y11/	1702.58	2245.14	#N/A	2	1974.87	0	1	0
2	12791	SunS_13_OVCAR3_HILIC_IntactGlycopeptide_F2.12791.12791.4.0.dta	4438.85	4	52.11	KLCPDCPLLAPLNDSR	N5H6F0S2	6-5-2-0-0	-2	0	4	1	1	1	1	8	b1/b3/b5/b6/b8/b9/b10/	y2/	2569.9	1868.94	4746	4	4438.85	1	1	1
2	12847	SunS_13_OVCAR3_HILIC_IntactGlycopeptide_F2.12847.12847.4.0.dta	4438.85	4	52.37	KLCPDCPLLAPLNDSR	N5H6F0S2	6-5-2-0-0	-2	0	4	1	1	1	1	17	b1/b2/b3/b5/b6/b8/b9/b10/b12/b14/	y1/y2/y3/y6/y7/y10/y13/	2569.9	1868.95	4607	4	4438.86	1	1	1
2	12855	SunS_13_OVCAR3_HILIC_IntactGlycopeptide_F2.12855.12855.5.0.dta	4438.85	5	52.41	KLCPDCPLLAPLNDSR	N5H6F0S2	6-5-2-0-0	0	0	4	1	1	1	1	12	b1/b3/b5/b6/b8/b9/b10/	y1/y2/y3/y6/y7/	2569.9	1868.94	6003	5	4438.85	1	1	1
2	12873	SunS_13_OVCAR3_HILIC_IntactGlycopeptide_F2.12873.12873.3.0.dta	4438.83	3	52.5	KLCPDCPLLAPLNDSR	N5H6F0S2	6-5-2-0-0	-2	0	4	1	1	1	1	8	b3/b5/b6/b8/b9/b10/	y1/y2/	2569.9	1868.93	4525	3	4438.85	1	1	1
2	12900	SunS_13_OVCAR3_HILIC_IntactGlycopeptide_F2.12900.12900.4.0.dta	4438.85	4	52.63	KLCPDCPLLAPLNDSR	N5H6F0S2	6-5-2-0-0	-2	0	4	1	1	1	1	13	b1/b2/b3/b5/b6/b8/b9/b10/	y1/y2/y3/y6/y7/	2569.9	1868.94	4933	4	4438.85	1	1	1
2	12910	SunS_13_OVCAR3_HILIC_IntactGlycopeptide_F2.12910.12910.5.0.dta	4438.84	5	52.67	KLCPDCPLLAPLNDSR	N5H6F0S2	6-5-2-0-0	-2	0	4	1	1	1	1	9	b1/b3/b5/b6/b8/b9/b10/	y1/y2/	2569.9	1868.93	6647	5	4438.85	1	1	1
2	12926	SunS_13_OVCAR3_HILIC_IntactGlycopeptide_F2.12926.12926.3.0.dta	4438.85	3	52.75	KLCPDCPLLAPLNDSR	N5H6F0S2	6-5-2-0-0	0	0	3	0	1	1	1	9	b1/b3/b5/b6/b9/b10/	y1/y2/y3/	2569.9	1868.95	5186	3	4438.84	1	1	1
2	12941	SunS_13_OVCAR3_HILIC_IntactGlycopeptide_F2.12941.12941.4.0.dta	4952.15	4	52.8	QVALQTFGNQTTIIPAGGAGYK	N5H6F3S1	6-5-1-3-0	-3	0	1	0	0	0	1	8	b3/b10/	y3/y6/y8/y9/y10/y11/	2716.98	2235.17	2439	4	4952.16	1	1	1
2	12964	SunS_13_OVCAR3_HILIC_IntactGlycopeptide_F2.12964.12964.4.0.dta	4438.85	4	52.88	KLCPDCPLLAPLNDSR	N5H6F0S2	6-5-2-0-0	-2	0	4	1	1	1	1	17	b1/b2/b3/b5/b6/b8/b9/b10/b12/	y1/y2/y3/y6/y7/y10/y11/y13/	2569.9	1868.95	5745	4	4438.87	1	1	1
2	12983	SunS_13_OVCAR3_HILIC_IntactGlycopeptide_F2.12983.12983.5.0.dta	4438.85	5	52.94	KLCPDCPLLAPLNDSR	N5H6F0S2	6-5-2-0-0	-2	0	4	1	1	1	1	15	b1/b2/b3/b5/b6/b7/b8/b9/b10/	y1/y2/y3/y6/y7/y11/	2569.9	1868.94	5937	5	4438.85	1	1	1
2	12994	SunS_13_OVCAR3_HILIC_IntactGlycopeptide_F2.12994.12994.4.0.dta	5319.34	4	52.98	FLKPYTLEEQKNLTVCPDGALFEQK	N4H5F1S2	5-4-2-1-0	-3	0	2	0	1	0	1	8		y3/y4/y5/y7/y9/y10/y12/y13/	2350.83	2968.51	#N/A	2	2660.68	0	1	0
2	13005	SunS_13_OVCAR3_HILIC_IntactGlycopeptide_F2.13005.13005.5.0.dta	5319.33	5	53.01	FLKPYTLEEQKNLTVCPDGALFEQK	N4H5F1S2	5-4-2-1-0	-2	0	2	0	1	0	1	15	b2/b3/b5/	y1/y2/y3/y4/y5/y7/y8/y9/y10/y11/y12/y13/	2350.83	2968.5	4045	5	5319.35	1	1	1
2	13030	SunS_13_OVCAR3_HILIC_IntactGlycopeptide_F2.13030.13030.6.0.dta	4438.85	6	53.08	KLCPDCPLLAPLNDSR	N5H6F0S2	6-5-2-0-0	-1	0	3	0	1	1	1	8	b1/b3/b5/b6/b8/b9/b10/	y2/	2569.9	1868.94	#N/A	6	4438.84	1	1	1
2	13035	SunS_13_OVCAR3_HILIC_IntactGlycopeptide_F2.13035.13035.5.0.dta	4073.71	5	53.1	KLCPDCPLLAPLNDSR	N4H5F0S2	5-4-2-0-0	-2	0	3	0	1	1	1	14	b1/b2/b3/b5/b6/b8/b9/b10/b14/	y1/y2/y3/y6/y7/	2204.77	1868.94	5646	5	4073.71	1	1	1
2	13054	SunS_13_OVCAR3_HILIC_IntactGlycopeptide_F2.13054.13054.4.0.dta	4438.85	4	53.15	KLCPDCPLLAPLNDSR	N5H6F0S2	6-5-2-0-0	-2	0	4	1	1	1	1	17	b1/b2/b3/b5/b6/b8/b9/b10/	y1/y2/y3/y6/y7/y8/y10/y11/y13/	2569.9	1868.94	5735	4	4438.86	1	1	1
2	13068	SunS_13_OVCAR3_HILIC_IntactGlycopeptide_F2.13068.13068.4.0.dta	4073.72	4	53.2	KLCPDCPLLAPLNDSR	N4H5F0S2	5-4-2-0-0	0	0	4	1	1	1	1	18	b1/b2/b3/b5/b6/b8/b9/b10/	y1/y2/y3/y6/y7/y8/y10/y11/y13/y14/	2204.77	1868.95	4475	4	4073.73	1	1	1
2	13069	SunS_13_OVCAR3_HILIC_IntactGlycopeptide_F2.13069.13069.5.0.dta	4438.85	5	53.2	KLCPDCPLLAPLNDSR	N5H6F0S2	6-5-2-0-0	-2	0	4	1	1	1	1	10	b1/b3/b5/b6/b8/b9/b10/	y1/y2/y3/	2569.9	1868.94	6132	5	4438.84	1	1	1
2	13090	SunS_13_OVCAR3_HILIC_IntactGlycopeptide_F2.13090.13090.3.0.dta	4073.71	3	53.28	KLCPDCPLLAPLNDSR	N4H5F0S2	5-4-2-0-0	0	0	4	1	1	1	1	17	b1/b2/b3/b5/b6/b7/b8/b9/b10/	y1/y2/y3/y6/y7/y10/y11/y13/	2204.77	1868.94	4184	3	4073.71	1	1	1
2	13094	SunS_13_OVCAR3_HILIC_IntactGlycopeptide_F2.13094.13094.3.0.dta	4438.82	3	53.29	KLCPDCPLLAPLNDSR	N5H6F0S2	6-5-2-0-0	-2	0	3	0	1	1	1	8	b3/b5/b6/b8/b9/b10/	y1/y2/	2569.9	1868.92	6782	3	4438.84	1	1	1
2	13107	SunS_13_OVCAR3_HILIC_IntactGlycopeptide_F2.13107.13107.5.0.dta	4073.7	5	53.35	KLCPDCPLLAPLNDSR	N4H5F0S2	5-4-2-0-0	0	0	3	0	1	1	1	9	b1/b3/b5/b6/b8/b9/b10/	y1/y2/	2204.77	1868.92	6658	5	4073.71	1	1	1
2	13121	SunS_13_OVCAR3_HILIC_IntactGlycopeptide_F2.13121.13121.4.0.dta	4438.85	4	53.41	KLCPDCPLLAPLNDSR	N5H6F0S2	6-5-2-0-0	0	0	4	1	1	1	1	16	b1/b2/b3/b5/b6/b7/b8/b9/b10/	y1/y2/y3/y6/y7/y11/y13/	2569.9	1868.95	5919	4	4438.86	1	1	1
2	13133	SunS_13_OVCAR3_HILIC_IntactGlycopeptide_F2.13133.13133.4.0.dta	4073.71	4	53.45	KLCPDCPLLAPLNDSR	N4H5F0S2	5-4-2-0-0	0	0	4	1	1	1	1	15	b1/b2/b3/b5/b6/b8/b9/b10/	y1/y2/y3/y6/y7/y11/y13/	2204.77	1868.94	5397	4	4073.72	1	1	1
2	13135	SunS_13_OVCAR3_HILIC_IntactGlycopeptide_F2.13135.13135.5.0.dta	4438.84	5	53.46	KLCPDCPLLAPLNDSR	N5H6F0S2	6-5-2-0-0	-2	0	4	1	1	1	1	10	b1/b3/b5/b6/b8/b9/b10/	y2/y3/y6/	2569.9	1868.94	12408	5	4438.85	1	1	1
2	13152	SunS_13_OVCAR3_HILIC_IntactGlycopeptide_F2.13152.13152.3.0.dta	4073.71	3	53.53	KLCPDCPLLAPLNDSR	N4H5F0S2	5-4-2-0-0	0	0	4	1	1	1	1	16	b1/b2/b3/b5/b6/b8/b9/b10/b14/	y1/y2/y3/y6/y7/y10/y13/	2204.77	1868.94	5672	3	4073.71	1	1	1
2	13157	SunS_13_OVCAR3_HILIC_IntactGlycopeptide_F2.13157.13157.3.0.dta	4438.83	3	53.55	KLCPDCPLLAPLNDSR	N5H6F0S2	6-5-2-0-0	-2	0	4	1	1	1	1	11	b1/b3/b5/b6/b8/b9/b10/	y1/y2/y3/y7/	2569.9	1868.92	4172	3	4438.84	1	1	1
2	13170	SunS_13_OVCAR3_HILIC_IntactGlycopeptide_F2.13170.13170.5.0.dta	4073.71	5	53.61	KLCPDCPLLAPLNDSR	N4H5F0S2	5-4-2-0-0	-2	0	4	1	1	1	1	15	b1/b2/b3/b5/b6/b8/b9/b10/	y1/y2/y3/y6/y7/y11/y13/	2204.77	1868.94	5857	5	4073.71	1	1	1
2	13185	SunS_13_OVCAR3_HILIC_IntactGlycopeptide_F2.13185.13185.4.0.dta	4438.86	4	53.66	KLCPDCPLLAPLNDSR	N5H6F0S2	6-5-2-0-0	0	0	4	1	1	1	1	12	b1/b3/b5/b6/b8/b9/b10/	y1/y2/y3/y6/y7/	2569.9	1868.95	6078	4	4438.84	1	1	1
2	13186	SunS_13_OVCAR3_HILIC_IntactGlycopeptide_F2.13186.13186.4.0.dta	4428.79	4	53.66	ALGFENATQALGR	N6H7F1S2	7-6-2-1-0	-2	0	4	1	1	1	1	6		y2/y3/y4/y5/y6/y7/	3081.09	1347.7	5157	4	4428.8	1	1	1
2	13203	SunS_13_OVCAR3_HILIC_IntactGlycopeptide_F2.13203.13203.4.0.dta	4073.71	4	53.72	KLCPDCPLLAPLNDSR	N4H5F0S2	5-4-2-0-0	-2	0	4	1	1	1	1	18	b1/b2/b3/b5/b6/b8/b9/b10/b12/	y1/y2/y3/y6/y7/y10/y11/y13/y14/	2204.77	1868.94	5840	4	4073.75	1	1	1
2	13214	SunS_13_OVCAR3_HILIC_IntactGlycopeptide_F2.13214.13214.4.0.dta	4038.81	4	53.76	IFPSGNVTSVLELSSNPAHR	N4H5F0S1	5-4-1-0-0	-2	0	3	0	1	1	1	11	b7/	y1/y4/y5/y6/y7/y8/y9/y10/y12/y13/	1913.68	2125.14	#N/A	2	2019.91	0	1	0
2	13222	SunS_13_OVCAR3_HILIC_IntactGlycopeptide_F2.13222.13222.3.0.dta	4073.71	3	53.79	KLCPDCPLLAPLNDSR	N4H5F0S2	5-4-2-0-0	0	0	4	1	1	1	1	18	b1/b2/b3/b5/b6/b7/b8/b9/b10/b12/b14/	y1/y2/y3/y6/y7/y11/y13/	2204.77	1868.93	4352	3	4073.71	1	1	1
2	13236	SunS_13_OVCAR3_HILIC_IntactGlycopeptide_F2.13236.13236.5.0.dta	4073.72	5	53.86	KLCPDCPLLAPLNDSR	N4H5F0S2	5-4-2-0-0	0	0	4	1	1	1	1	11	b1/b2/b3/b5/b6/b8/b9/b10/	y2/y3/y7/	2204.77	1868.95	6214	5	4073.72	1	1	1
2	13248	SunS_13_OVCAR3_HILIC_IntactGlycopeptide_F2.13248.13248.4.0.dta	4438.83	4	53.92	KLCPDCPLLAPLNDSR	N5H6F0S2	6-5-2-0-0	-2	0	3	0	1	1	1	8	b1/b3/b5/b6/b8/b9/b10/	y2/	2569.9	1868.93	7002	4	4438.84	1	1	1
2	13259	SunS_13_OVCAR3_HILIC_IntactGlycopeptide_F2.13259.13259.4.0.dta	4073.7	4	53.97	KLCPDCPLLAPLNDSR	N4H5F0S2	5-4-2-0-0	-2	0	4	1	1	1	1	17	b1/b2/b3/b5/b6/b8/b9/b10/b12/	y1/y2/y3/y6/y7/y8/y10/y13/	2204.77	1868.93	5770	4	4073.72	1	1	1
2	13274	SunS_13_OVCAR3_HILIC_IntactGlycopeptide_F2.13274.13274.3.0.dta	4073.72	3	54.05	KLCPDCPLLAPLNDSR	N4H5F0S2	5-4-2-0-0	-2	0	4	1	1	1	1	8	b1/b3/b5/b6/b9/b10/	y1/y2/	2204.77	1868.95	6505	3	4073.71	1	1	1
2	13296	SunS_13_OVCAR3_HILIC_IntactGlycopeptide_F2.13296.13296.4.0.dta	4438.84	4	54.18	KLCPDCPLLAPLNDSR	N5H6F0S2	6-5-2-0-0	-2	0	3	0	1	1	1	7	b3/b5/b6/b8/b9/b10/	y2/	2569.9	1868.93	4251	4	4438.85	1	1	1
2	13306	SunS_13_OVCAR3_HILIC_IntactGlycopeptide_F2.13306.13306.4.0.dta	4073.7	4	54.23	KLCPDCPLLAPLNDSR	N4H5F0S2	5-4-2-0-0	-2	0	4	1	1	1	1	12	b1/b2/b3/b5/b6/b8/b9/b10/	y1/y2/y3/y6/	2204.77	1868.93	6362	4	4073.72	1	1	1
2	13344	SunS_13_OVCAR3_HILIC_IntactGlycopeptide_F2.13344.13344.4.0.dta	4438.84	4	54.44	KLCPDCPLLAPLNDSR	N5H6F0S2	6-5-2-0-0	0	0	3	0	1	1	1	9	b1/b3/b5/b6/b7/b8/b9/b10/	y2/	2569.9	1868.94	6487	4	4438.84	1	1	1
2	13353	SunS_13_OVCAR3_HILIC_IntactGlycopeptide_F2.13353.13353.4.0.dta	4073.7	4	54.48	KLCPDCPLLAPLNDSR	N4H5F0S2	5-4-2-0-0	0	0	3	0	1	1	1	10	b1/b3/b5/b6/b8/b9/b10/	y1/y2/y6/	2204.77	1868.92	5309	4	4073.71	1	1	1
2	13391	SunS_13_OVCAR3_HILIC_IntactGlycopeptide_F2.13391.13391.4.0.dta	4438.83	4	54.7	KLCPDCPLLAPLNDSR	N5H6F0S2	6-5-2-0-0	-2	0	2	0	0	1	1	7	b1/b3/b5/b6/b10/	y2/y3/	2569.9	1868.93	7200	4	4438.84	1	1	1
2	13442	SunS_13_OVCAR3_HILIC_IntactGlycopeptide_F2.13442.13442.4.0.dta	4073.72	4	55	KLCPDCPLLAPLNDSR	N4H5F0S2	5-4-2-0-0	0	0	3	0	1	1	1	6	b3/b5/b6/b9/b10/	y2/	2204.77	1868.94	7025	4	4073.72	1	1	1
2	13486	SunS_13_OVCAR3_HILIC_IntactGlycopeptide_F2.13486.13486.4.0.dta	4073.7	4	55.26	KLCPDCPLLAPLNDSR	N4H5F0S2	5-4-2-0-0	-2	0	3	0	1	1	1	6	b1/b3/b5/b6/b10/	y2/	2204.77	1868.93	4199	4	4073.72	1	1	1
2	13531	SunS_13_OVCAR3_HILIC_IntactGlycopeptide_F2.13531.13531.4.0.dta	4073.7	4	55.52	KLCPDCPLLAPLNDSR	N4H5F0S2	5-4-2-0-0	-2	0	2	0	0	1	1	8	b1/b3/b5/b6/b9/b10/	y2/y3/	2204.77	1868.93	6419	4	4073.71	1	1	1
2	13555	SunS_13_OVCAR3_HILIC_IntactGlycopeptide_F2.13555.13555.4.0.dta	5173.1	4	55.66	YAIQYFNNNTSHSHLFDLK	N5H6F0S3	6-5-3-0-0	-3	0	2	0	1	0	1	6	b2/b5/b9/	y2/y6/y11/	2861	2312.1	#N/A	4	5173.11	1	1	1
2	13576	SunS_13_OVCAR3_HILIC_IntactGlycopeptide_F2.13576.13576.4.0.dta	4073.73	4	55.78	KLCPDCPLLAPLNDSR	N4H5F0S2	5-4-2-0-0	0	0	2	0	0	1	1	7	b1/b3/b5/b6/b9/b10/	y2/	2204.77	1868.96	#N/A	4	4073.72	1	1	1
2	13730	SunS_13_OVCAR3_HILIC_IntactGlycopeptide_F2.13730.13730.3.0.dta	3692.52	3	56.74	DNATEEEILVYLEK	N2H10F0S0	10-2-0-0-0	-1	0	2	1	0	1	0	17	b2/b3/b6/b8/b9/b10/	y2/y3/y4/y5/y6/y7/y8/y9/y10/y11/y12/	2026.69	1665.84	520	3	3692.51	1	1	1
2	13746	SunS_13_OVCAR3_HILIC_IntactGlycopeptide_F2.13746.13746.3.0.dta	3530.47	3	56.83	DNATEEEILVYLEK	N2H9F0S0	9-2-0-0-0	-2	0	2	1	0	1	0	18	b2/b3/b4/b8/b9/b10/	y1/y2/y3/y4/y5/y6/y7/y8/y9/y10/y11/y12/	1864.63	1665.83	119	3	3530.46	1	1	1
2	13762	SunS_13_OVCAR3_HILIC_IntactGlycopeptide_F2.13762.13762.3.0.dta	3368.4	3	56.91	DNATEEEILVYLEK	N2H8F0S0	8-2-0-0-0	-1	0	2	1	0	1	0	18	b2/b3/b7/b8/b9/b10/	y1/y2/y3/y4/y5/y6/y7/y8/y9/y10/y11/y12/	1702.58	1665.82	156	3	3368.41	1	1	1
2	13794	SunS_13_OVCAR3_HILIC_IntactGlycopeptide_F2.13794.13794.3.0.dta	4193.84	3	57.09	TAADTTGLQPILNQFTPANISR	N2H9F0S0	9-2-0-0-0	-2	0	1	0	1	0	0	18	b2/b3/b4/b5/b6/b7/b8/b9/b11/b12/	y1/y2/y3/y6/y7/y11/y13/y14/	1864.63	2329.21	3698	3	4193.85	1	1	1
2	13812	SunS_13_OVCAR3_HILIC_IntactGlycopeptide_F2.13812.13812.3.0.dta	4031.8	3	57.18	TAADTTGLQPILNQFTPANISR	N2H8F0S0	8-2-0-0-0	-2	0	1	0	0	1	0	16	b2/b3/b4/b5/b6/b7/b8/b9/b11/b12/	y1/y2/y3/y6/y7/y13/	1702.58	2329.22	3310	3	4031.8	1	1	1
2	13859	SunS_13_OVCAR3_HILIC_IntactGlycopeptide_F2.13859.13859.3.0.dta	3044.31	3	57.45	DNATEEEILVYLEK	N2H6F0S0	6-2-0-0-0	0	0	2	1	0	1	0	17	b2/b3/b7/b8/b9/b10/	y2/y3/y4/y5/y6/y7/y8/y9/y10/y11/y12/	1378.48	1665.84	144	3	3044.3	1	1	1
2	13916	SunS_13_OVCAR3_HILIC_IntactGlycopeptide_F2.13916.13916.3.0.dta	3615.54	3	57.77	DYYPINESLASLPLR	N2H9F0S0	9-2-0-0-0	-1	0	2	1	0	1	0	12	b2/b3/b7/	y1/y3/y4/y5/y6/y7/y8/y9/y12/	1864.63	1750.9	1358	3	3615.54	1	1	1
2	13970	SunS_13_OVCAR3_HILIC_IntactGlycopeptide_F2.13970.13970.3.0.dta	3453.48	3	58.07	DYYPINESLASLPLR	N2H8F0S0	8-2-0-0-0	0	0	2	1	0	1	0	13	b2/b3/b4/	y1/y3/y4/y5/y6/y7/y8/y9/y10/y12/	1702.58	1750.9	1328	3	3453.49	1	1	1
2	13971	SunS_13_OVCAR3_HILIC_IntactGlycopeptide_F2.13971.13971.3.0.dta	3291.43	3	58.08	DYYPINESLASLPLR	N2H7F0S0	7-2-0-0-0	0	0	2	1	0	1	0	12	b2/b3/	y1/y3/y4/y5/y6/y7/y8/y9/y10/y12/	1540.53	1750.9	1115	3	3291.43	1	1	1
2	14006	SunS_13_OVCAR3_HILIC_IntactGlycopeptide_F2.14006.14006.3.0.dta	3129.39	3	58.27	DYYPINESLASLPLR	N2H6F0S0	6-2-0-0-0	-1	0	2	1	0	1	0	13	b2/b3/b4/	y1/y3/y4/y5/y6/y7/y8/y9/y10/y12/	1378.48	1750.91	806	3	3129.38	1	1	1
2	14402	SunS_13_OVCAR3_HILIC_IntactGlycopeptide_F2.14402.14402.5.0.dta	5950.57	5	60.51	RPTGEVYDIEIDTLETTCHVLDPTPLANCSVR	N5H6F0S1	6-5-1-0-0	-3	0	1	0	0	0	1	12	b2/b5/b7/b8/b9/b10/b11/b12/b22/	y1/y4/y10/	2278.81	3671.76	7935	5	5950.59	1	1	1
2	14522	SunS_13_OVCAR3_HILIC_IntactGlycopeptide_F2.14522.14522.4.0.dta	4729.96	4	61.21	KLCPDCPLLAPLNDSR	N5H6F0S3	6-5-3-0-0	0	0	4	1	1	1	1	10	b1/b3/b5/b6/b8/b9/b10/	y2/y3/y6/	2861	1868.96	6257	4	4729.94	1	1	1
2	14641	SunS_13_OVCAR3_HILIC_IntactGlycopeptide_F2.14641.14641.4.0.dta	4729.93	4	61.91	KLCPDCPLLAPLNDSR	N5H6F0S3	6-5-3-0-0	0	0	4	1	1	1	1	9	b1/b3/b5/b6/b8/b9/b10/	y2/y6/	2861	1868.93	6392	4	4729.95	1	1	1
2	14904	SunS_13_OVCAR3_HILIC_IntactGlycopeptide_F2.14904.14904.4.0.dta	4310.74	4	63.45	LCPDCPLLAPLNDSR	N5H6F0S2	6-5-2-0-0	-2	0	3	1	0	1	1	9	b2/b3/b5/b7/b8/b9/	y2/y6/y7/	2569.9	1740.84	6000	4	4310.75	1	1	1
2	14914	SunS_13_OVCAR3_HILIC_IntactGlycopeptide_F2.14914.14914.4.0.dta	3945.61	4	63.51	LCPDCPLLAPLNDSR	N4H5F0S2	5-4-2-0-0	-2	0	3	1	0	1	1	7	b2/b5/b7/b8/b9/	y2/y6/	2204.77	1740.84	6990	4	3945.62	1	1	1
2	14959	SunS_13_OVCAR3_HILIC_IntactGlycopeptide_F2.14959.14959.4.0.dta	3945.61	4	63.76	LCPDCPLLAPLNDSR	N4H5F0S2	5-4-2-0-0	-1	0	3	1	0	1	1	10	b2/b3/b4/b5/b7/b8/b9/	y2/y6/y7/	2204.77	1740.83	#N/A	4	3945.62	1	1	1
2	15082	SunS_13_OVCAR3_HILIC_IntactGlycopeptide_F2.15082.15082.4.0.dta	3945.62	4	64.48	LCPDCPLLAPLNDSR	N4H5F0S2	5-4-2-0-0	0	0	4	1	1	1	1	12	b2/b3/b5/b6/b7/b8/b9/	y1/y2/y3/y6/y7/	2204.77	1740.85	5479	4	3945.62	1	1	1
2	15129	SunS_13_OVCAR3_HILIC_IntactGlycopeptide_F2.15129.15129.5.0.dta	6241.66	5	64.69	RPTGEVYDIEIDTLETTCHVLDPTPLANCSVR	N5H6F0S2	6-5-2-0-0	-3	0	2	0	1	0	1	19	b2/b5/b6/b7/b8/b9/b10/b11/b12/b14/b15/b18/b22/	y1/y3/y4/y10/y17/y20/	2569.9	3671.76	#N/A	5	6242.7	0	1	0
2	15156	SunS_13_OVCAR3_HILIC_IntactGlycopeptide_F2.15156.15156.6.0.dta	6241.66	6	64.82	RPTGEVYDIEIDTLETTCHVLDPTPLANCSVR	N5H6F0S2	6-5-2-0-0	-3	0	2	0	1	0	1	20	b2/b5/b6/b7/b8/b9/b10/b11/b12/b13/b14/b15/b18/b22/	y1/y3/y4/y8/y10/y17/	2569.9	3671.76	6148	6	6241.68	1	1	1
2	15184	SunS_13_OVCAR3_HILIC_IntactGlycopeptide_F2.15184.15184.5.0.dta	6022.59	5	64.93	RPTGEVYDIEIDTLETTCHVLDPTPLANCSVR	N4H5F1S2	5-4-2-1-0	-4	0	1	0	0	0	1	9	b2/b5/b8/b10/b12/b22/	y1/y10/y12/	2350.83	3671.76	#N/A	5	6023.61	0	1	0
2	15185	SunS_13_OVCAR3_HILIC_IntactGlycopeptide_F2.15185.15185.5.0.dta	5876.55	5	64.93	RPTGEVYDIEIDTLETTCHVLDPTPLANCSVR	N4H5F0S2	5-4-2-0-0	-2	0	1	0	0	0	1	7	b2/b8/b10/b12/b15/	y1/y3/	2204.77	3671.78	#N/A	5	5877.55	0	1	0
2	15188	SunS_13_OVCAR3_HILIC_IntactGlycopeptide_F2.15188.15188.5.0.dta	6241.68	5	64.94	RPTGEVYDIEIDTLETTCHVLDPTPLANCSVR	N5H6F0S2	6-5-2-0-0	-3	0	1	0	0	0	1	21	b2/b5/b6/b7/b8/b9/b10/b11/b12/b13/b14/b15/b17/b18/b22/	y1/y3/y4/y10/y17/y20/	2569.9	3671.78	#N/A	5	6242.69	0	1	0
2	15200	SunS_13_OVCAR3_HILIC_IntactGlycopeptide_F2.15200.15200.8.0.dta	6241.67	8	65	RPTGEVYDIEIDTLETTCHVLDPTPLANCSVR	N5H6F0S2	6-5-2-0-0	-4	0	1	0	0	0	1	13	b2/b5/b6/b7/b8/b9/b10/b11/b12/b15/	y1/y8/y10/	2569.9	3671.77	#N/A	4	3122.34	0	1	0
2	15205	SunS_13_OVCAR3_HILIC_IntactGlycopeptide_F2.15205.15205.4.0.dta	5876.57	4	65	RPTGEVYDIEIDTLETTCHVLDPTPLANCSVR	N4H5F0S2	5-4-2-0-0	-3	0	1	0	0	0	1	15	b2/b5/b7/b8/b9/b10/b11/b12/b14/b15/b22/	y1/y4/y10/y17/	2204.77	3671.8	10861	4	5879.58	0	1	0
2	15209	SunS_13_OVCAR3_HILIC_IntactGlycopeptide_F2.15209.15209.7.0.dta	5876.54	7	65.02	RPTGEVYDIEIDTLETTCHVLDPTPLANCSVR	N4H5F0S2	5-4-2-0-0	-4	0	1	0	0	0	1	19	b1/b2/b5/b6/b7/b8/b9/b10/b11/b12/b13/b14/b15/b16/	y1/y3/y4/y8/y10/	2204.77	3671.77	12743	7	5880.54	0	1	0
2	15211	SunS_13_OVCAR3_HILIC_IntactGlycopeptide_F2.15211.15211.6.0.dta	5876.56	6	65.02	RPTGEVYDIEIDTLETTCHVLDPTPLANCSVR	N4H5F0S2	5-4-2-0-0	-2	0	1	0	0	0	1	26	b1/b2/b3/b5/b6/b7/b8/b9/b10/b11/b12/b13/b14/b15/b16/b17/b18/	y1/y3/y4/y6/y7/y8/y10/y12/y17/	2204.77	3671.79	12843	6	5878.56	0	1	0
2	15236	SunS_13_OVCAR3_HILIC_IntactGlycopeptide_F2.15236.15236.6.0.dta	6241.65	6	65.09	RPTGEVYDIEIDTLETTCHVLDPTPLANCSVR	N5H6F0S2	6-5-2-0-0	-3	0	1	0	0	0	1	23	b2/b5/b6/b7/b8/b9/b10/b11/b12/b13/b14/b15/b16/b17/b18/b22/	y1/y3/y4/y8/y10/y12/y17/	2569.9	3671.75	6156	6	6241.68	1	1	1
2	15257	SunS_13_OVCAR3_HILIC_IntactGlycopeptide_F2.15257.15257.7.0.dta	6241.68	7	65.14	RPTGEVYDIEIDTLETTCHVLDPTPLANCSVR	N5H6F0S2	6-5-2-0-0	-4	0	2	0	1	0	1	22	b2/b3/b5/b6/b7/b8/b9/b10/b11/b12/b13/b14/b15/b18/b22/	y1/y3/y4/y5/y6/y8/y10/	2569.9	3671.77	#N/A	7	6245.66	0	1	0
2	15282	SunS_13_OVCAR3_HILIC_IntactGlycopeptide_F2.15282.15282.5.0.dta	5876.56	5	65.2	RPTGEVYDIEIDTLETTCHVLDPTPLANCSVR	N4H5F0S2	5-4-2-0-0	-3	0	2	0	1	0	1	24	b2/b3/b5/b6/b7/b8/b9/b10/b11/b12/b13/b14/b15/b16/b17/b18/b22/	y1/y3/y4/y8/y10/y12/y17/	2204.77	3671.79	6306	5	5877.56	0	1	0
2	15283	SunS_13_OVCAR3_HILIC_IntactGlycopeptide_F2.15283.15283.5.0.dta	6241.68	5	65.21	RPTGEVYDIEIDTLETTCHVLDPTPLANCSVR	N5H6F0S2	6-5-2-0-0	-3	0	2	0	1	0	1	21	b2/b5/b6/b7/b8/b9/b10/b11/b12/b14/b15/b18/b22/	y1/y3/y4/y8/y10/y11/y17/y20/	2569.9	3671.78	#N/A	5	6242.68	0	1	0
2	15294	SunS_13_OVCAR3_HILIC_IntactGlycopeptide_F2.15294.15294.4.0.dta	5876.57	4	65.26	RPTGEVYDIEIDTLETTCHVLDPTPLANCSVR	N4H5F0S2	5-4-2-0-0	-3	0	1	0	0	0	1	18	b2/b5/b7/b8/b9/b10/b11/b12/b13/b14/b15/b22/	y1/y3/y4/y10/y17/y20/	2204.77	3671.8	5264	4	5876.55	1	1	1
2	15298	SunS_13_OVCAR3_HILIC_IntactGlycopeptide_F2.15298.15298.6.0.dta	5876.55	6	65.28	RPTGEVYDIEIDTLETTCHVLDPTPLANCSVR	N4H5F0S2	5-4-2-0-0	-4	0	1	0	0	0	1	21	b1/b2/b5/b6/b7/b8/b9/b10/b11/b12/b13/b14/b15/b22/	y1/y3/y4/y8/y10/y12/y17/	2204.77	3671.78	#N/A	2	1959.86	0	1	0
2	15300	SunS_13_OVCAR3_HILIC_IntactGlycopeptide_F2.15300.15300.5.0.dta	6022.61	5	65.29	RPTGEVYDIEIDTLETTCHVLDPTPLANCSVR	N4H5F1S2	5-4-2-1-0	-4	0	1	0	0	0	1	7	b2/b6/b8/b10/b11/b12/	y4/	2350.83	3671.78	#N/A	5	6023.61	0	1	0
2	15312	SunS_13_OVCAR3_HILIC_IntactGlycopeptide_F2.15312.15312.6.0.dta	6241.67	6	65.35	RPTGEVYDIEIDTLETTCHVLDPTPLANCSVR	N5H6F0S2	6-5-2-0-0	-3	0	1	0	0	0	1	20	b2/b5/b6/b7/b8/b9/b10/b11/b12/b13/b14/b15/b18/b22/	y1/y3/y4/y10/y11/y17/	2569.9	3671.77	6718	6	6241.69	1	1	1
2	15326	SunS_13_OVCAR3_HILIC_IntactGlycopeptide_F2.15326.15326.4.0.dta	6241.7	4	65.39	RPTGEVYDIEIDTLETTCHVLDPTPLANCSVR	N5H6F0S2	6-5-2-0-0	-2	0	1	0	0	0	1	15	b2/b5/b8/b9/b10/b11/b12/b14/b15/b22/	y1/y3/y10/y17/y20/	2569.9	3671.79	6888	4	6241.7	1	1	1
2	15355	SunS_13_OVCAR3_HILIC_IntactGlycopeptide_F2.15355.15355.5.0.dta	5876.56	5	65.48	RPTGEVYDIEIDTLETTCHVLDPTPLANCSVR	N4H5F0S2	5-4-2-0-0	-3	0	1	0	0	0	1	16	b2/b5/b7/b8/b9/b10/b11/b12/b15/b18/b22/	y1/y3/y4/y10/y17/	2204.77	3671.79	6808	5	5877.58	0	1	0
2	15356	SunS_13_OVCAR3_HILIC_IntactGlycopeptide_F2.15356.15356.5.0.dta	6241.69	5	65.48	RPTGEVYDIEIDTLETTCHVLDPTPLANCSVR	N5H6F0S2	6-5-2-0-0	-3	0	2	0	1	0	1	19	b2/b5/b6/b7/b8/b9/b10/b11/b12/b14/b15/b18/b22/	y1/y3/y4/y10/y17/y20/	2569.9	3671.78	#N/A	5	6242.69	0	1	0
2	15364	SunS_13_OVCAR3_HILIC_IntactGlycopeptide_F2.15364.15364.4.0.dta	5876.57	4	65.52	RPTGEVYDIEIDTLETTCHVLDPTPLANCSVR	N4H5F0S2	5-4-2-0-0	0	0	2	0	1	0	1	18	b1/b2/b6/b7/b8/b9/b10/b11/b12/b15/b22/	y1/y3/y4/y10/y13/y17/y20/	2204.77	3671.8	7108	4	5876.55	1	1	1
2	15367	SunS_13_OVCAR3_HILIC_IntactGlycopeptide_F2.15367.15367.6.0.dta	5876.54	6	65.54	RPTGEVYDIEIDTLETTCHVLDPTPLANCSVR	N4H5F0S2	5-4-2-0-0	-3	0	2	0	1	0	1	15	b2/b5/b6/b7/b8/b9/b10/b11/b12/b18/	y1/y3/y4/y8/y10/	2204.77	3671.77	6266	6	5876.55	1	1	1
2	15401	SunS_13_OVCAR3_HILIC_IntactGlycopeptide_F2.15401.15401.5.0.dta	5876.52	5	65.73	RPTGEVYDIEIDTLETTCHVLDPTPLANCSVR	N4H5F0S2	5-4-2-0-0	-3	0	1	0	0	0	1	9	b2/b5/b8/b9/b10/b11/b12/b22/	y1/	2204.77	3671.74	12626	5	5877.55	0	1	0
2	15737	SunS_13_OVCAR3_HILIC_IntactGlycopeptide_F2.15737.15737.4.0.dta	4311.82	4	67.95	GLGFNLTELAEAEIHK	N5H6F0S2	6-5-2-0-0	-2	0	4	1	1	1	1	9		y2/y3/y5/y6/y7/y8/y9/y10/y11/	2569.9	1741.92	4306	4	4311.82	1	1	1
2	15755	SunS_13_OVCAR3_HILIC_IntactGlycopeptide_F2.15755.15755.3.0.dta	4311.83	3	68.06	GLGFNLTELAEAEIHK	N5H6F0S2	6-5-2-0-0	-2	0	4	1	1	1	1	7	b6/	y2/y5/y7/y8/y9/y10/	2569.9	1741.92	2996	3	4311.82	1	1	1
2	15780	SunS_13_OVCAR3_HILIC_IntactGlycopeptide_F2.15780.15780.4.0.dta	4311.82	4	68.21	GLGFNLTELAEAEIHK	N5H6F0S2	6-5-2-0-0	-2	0	4	1	1	1	1	19	b3/b6/b8/b9/b10/b14/	y1/y2/y3/y4/y5/y6/y7/y8/y9/y10/y11/y12/y14/	2569.9	1741.92	2706	4	4311.83	1	1	1
2	15796	SunS_13_OVCAR3_HILIC_IntactGlycopeptide_F2.15796.15796.3.0.dta	4311.83	3	68.32	GLGFNLTELAEAEIHK	N5H6F0S2	6-5-2-0-0	-2	0	4	1	1	1	1	7		y2/y3/y4/y7/y8/y9/y10/	2569.9	1741.92	#N/A	3	4311.82	1	1	1
2	15819	SunS_13_OVCAR3_HILIC_IntactGlycopeptide_F2.15819.15819.4.0.dta	4311.82	4	68.47	GLGFNLTELAEAEIHK	N5H6F0S2	6-5-2-0-0	-2	0	4	1	1	1	1	16	b2/b3/b6/b7/b12/	y2/y3/y4/y5/y6/y7/y8/y9/y10/y11/y12/	2569.9	1741.92	4542	4	4311.83	1	1	1
2	15859	SunS_13_OVCAR3_HILIC_IntactGlycopeptide_F2.15859.15859.4.0.dta	4311.82	4	68.72	GLGFNLTELAEAEIHK	N5H6F0S2	6-5-2-0-0	-2	0	4	1	1	1	1	17	b3/b6/b7/b8/b11/	y1/y2/y3/y4/y5/y6/y7/y8/y9/y10/y11/y12/	2569.9	1741.91	2604	4	4311.83	1	1	1
2	15899	SunS_13_OVCAR3_HILIC_IntactGlycopeptide_F2.15899.15899.4.0.dta	4311.83	4	68.98	GLGFNLTELAEAEIHK	N5H6F0S2	6-5-2-0-0	-2	0	4	1	1	1	1	10	b13/	y2/y3/y4/y5/y6/y7/y8/y10/y11/	2569.9	1741.92	5644	4	4311.83	1	1	1
2	15940	SunS_13_OVCAR3_HILIC_IntactGlycopeptide_F2.15940.15940.4.0.dta	4311.83	4	69.24	GLGFNLTELAEAEIHK	N5H6F0S2	6-5-2-0-0	-2	0	4	1	1	1	1	8	b10/	y2/y3/y5/y6/y7/y9/y10/	2569.9	1741.92	2933	4	4311.82	1	1	1
2	16140	SunS_13_OVCAR3_HILIC_IntactGlycopeptide_F2.16140.16140.5.0.dta	6532.78	5	70.49	RPTGEVYDIEIDTLETTCHVLDPTPLANCSVR	N5H6F0S3	6-5-3-0-0	-3	0	1	0	0	0	1	12	b2/b5/b8/b9/b10/b11/b12/b15/b22/	y1/y4/y10/	2861	3671.78	#N/A	5	6533.78	0	1	0
2	16156	SunS_13_OVCAR3_HILIC_IntactGlycopeptide_F2.16156.16156.7.0.dta	6532.78	7	70.58	RPTGEVYDIEIDTLETTCHVLDPTPLANCSVR	N5H6F0S3	6-5-3-0-0	-3	0	1	0	0	0	1	14	b2/b5/b6/b7/b8/b9/b10/b11/b12/b15/	y1/y3/y4/y10/	2861	3671.78	6697	7	6535.81	0	1	0
2	16186	SunS_13_OVCAR3_HILIC_IntactGlycopeptide_F2.16186.16186.5.0.dta	6532.78	5	70.74	RPTGEVYDIEIDTLETTCHVLDPTPLANCSVR	N5H6F0S3	6-5-3-0-0	-3	0	1	0	0	0	1	17	b2/b5/b7/b8/b9/b10/b11/b12/b14/b15/b22/	y1/y3/y4/y10/y17/y20/	2861	3671.78	#N/A	5	6533.78	0	1	0
2	16206	SunS_13_OVCAR3_HILIC_IntactGlycopeptide_F2.16206.16206.6.0.dta	6532.77	6	70.86	RPTGEVYDIEIDTLETTCHVLDPTPLANCSVR	N5H6F0S3	6-5-3-0-0	-3	0	1	0	0	0	1	15	b2/b5/b6/b7/b8/b9/b10/b11/b12/b15/b17/b22/	y1/y4/y10/	2861	3671.77	#N/A	6	6532.78	1	1	1
2	16207	SunS_13_OVCAR3_HILIC_IntactGlycopeptide_F2.16207.16207.7.0.dta	6532.75	7	70.86	RPTGEVYDIEIDTLETTCHVLDPTPLANCSVR	N5H6F0S3	6-5-3-0-0	-3	0	1	0	0	0	1	14	b2/b5/b6/b7/b8/b9/b10/b11/b12/b22/	y1/y4/y10/y11/	2861	3671.75	6809	7	6535.81	0	1	0
2	16271	SunS_13_OVCAR3_HILIC_IntactGlycopeptide_F2.16271.16271.5.0.dta	6532.78	5	71.26	RPTGEVYDIEIDTLETTCHVLDPTPLANCSVR	N5H6F0S3	6-5-3-0-0	-4	0	1	0	0	0	1	6	b2/b8/b12/b15/	y1/y10/	2861	3671.78	#N/A	5	6533.78	0	1	0
2	16981	SunS_13_OVCAR3_HILIC_IntactGlycopeptide_F2.16981.16981.4.0.dta	4602.9	4	75.61	GLGFNLTELAEAEIHK	N5H6F0S3	6-5-3-0-0	-2	0	4	1	1	1	1	24	b2/b3/b4/b5/b6/b8/b9/b10/b11/b12/b14/	y1/y2/y3/y4/y5/y6/y7/y8/y9/y10/y11/y12/y14/	2861	1741.9	3332	4	4602.91	1	1	1
2	16997	SunS_13_OVCAR3_HILIC_IntactGlycopeptide_F2.16997.16997.5.0.dta	4602.9	5	75.71	GLGFNLTELAEAEIHK	N5H6F0S3	6-5-3-0-0	-3	0	4	1	1	1	1	10	b3/b6/	y2/y5/y6/y7/y8/y9/y10/y12/	2861	1741.9	5210	5	4602.91	1	1	1
2	17026	SunS_13_OVCAR3_HILIC_IntactGlycopeptide_F2.17026.17026.4.0.dta	4602.9	4	75.87	GLGFNLTELAEAEIHK	N5H6F0S3	6-5-3-0-0	-2	0	4	1	1	1	1	24	b3/b4/b5/b6/b7/b8/b9/b10/b11/b13/b14/	y1/y2/y3/y4/y5/y6/y7/y8/y9/y10/y11/y12/y14/	2861	1741.9	4518	4	4602.92	1	1	1
2	17069	SunS_13_OVCAR3_HILIC_IntactGlycopeptide_F2.17069.17069.4.0.dta	4602.91	4	76.12	GLGFNLTELAEAEIHK	N5H6F0S3	6-5-3-0-0	-2	0	4	1	1	1	1	13	b3/b6/	y2/y3/y4/y5/y6/y7/y8/y9/y10/y11/y14/	2861	1741.91	#N/A	4	4602.92	1	1	1
2	17112	SunS_13_OVCAR3_HILIC_IntactGlycopeptide_F2.17112.17112.4.0.dta	4602.92	4	76.38	GLGFNLTELAEAEIHK	N5H6F0S3	6-5-3-0-0	-2	0	4	1	1	1	1	10		y2/y3/y4/y5/y6/y7/y8/y9/y10/y11/	2861	1741.92	3341	4	4602.91	1	1	1
2	17151	SunS_13_OVCAR3_HILIC_IntactGlycopeptide_F2.17151.17151.4.0.dta	4311.81	4	76.61	GLGFNLTELAEAEIHK	N5H6F0S2	6-5-2-0-0	-2	0	4	1	1	1	1	6		y5/y6/y7/y8/y9/y10/	2569.9	1741.91	4737	4	4311.82	1	1	1
2	17156	SunS_13_OVCAR3_HILIC_IntactGlycopeptide_F2.17156.17156.4.0.dta	4602.92	4	76.64	GLGFNLTELAEAEIHK	N5H6F0S3	6-5-3-0-0	-2	0	4	1	1	1	1	18	b3/b6/b7/b9/b14/	y1/y2/y3/y4/y5/y6/y7/y8/y9/y10/y11/y12/y14/	2861	1741.92	2578	4	4602.92	1	1	1
2	17157	SunS_13_OVCAR3_HILIC_IntactGlycopeptide_F2.17157.17157.5.0.dta	4602.93	5	76.64	GLGFNLTELAEAEIHK	N5H6F0S3	6-5-3-0-0	-1	0	4	1	1	1	1	8		y2/y5/y6/y7/y8/y9/y10/y11/	2861	1741.93	#N/A	5	4602.92	1	1	1
2	17200	SunS_13_OVCAR3_HILIC_IntactGlycopeptide_F2.17200.17200.4.0.dta	4287.84	4	76.87	DFEDLYTPVNGSIVIVR	N4H5F1S2	5-4-2-1-0	-2	0	2	1	0	1	0	10	b2/b4/b5/b7/	y1/y2/y3/y4/y7/y10/	2350.83	1937.01	5567	4	4287.84	1	1	1
2	17250	SunS_13_OVCAR3_HILIC_IntactGlycopeptide_F2.17250.17250.4.0.dta	4311.82	4	77.12	GLGFNLTELAEAEIHK	N5H6F0S2	6-5-2-0-0	-2	0	4	1	1	1	1	8	b6/	y2/y3/y5/y6/y7/y9/y10/	2569.9	1741.91	4721	4	4311.83	1	1	1
2	17255	SunS_13_OVCAR3_HILIC_IntactGlycopeptide_F2.17255.17255.4.0.dta	4602.91	4	77.15	GLGFNLTELAEAEIHK	N5H6F0S3	6-5-3-0-0	-2	0	4	1	1	1	1	26	b2/b3/b4/b5/b6/b7/b8/b9/b10/b11/b12/b13/b14/	y1/y2/y3/y4/y5/y6/y7/y8/y9/y10/y11/y12/y14/	2861	1741.91	3350	4	4602.93	1	1	1
2	17257	SunS_13_OVCAR3_HILIC_IntactGlycopeptide_F2.17257.17257.6.0.dta	4602.9	6	77.15	GLGFNLTELAEAEIHK	N5H6F0S3	6-5-3-0-0	-2	0	4	1	1	1	1	8		y2/y5/y6/y7/y8/y9/y10/y11/	2861	1741.9	#N/A	3	2301.96	0	1	0
2	17259	SunS_13_OVCAR3_HILIC_IntactGlycopeptide_F2.17259.17259.5.0.dta	4602.91	5	77.16	GLGFNLTELAEAEIHK	N5H6F0S3	6-5-3-0-0	-1	0	4	1	1	1	1	27	b2/b3/b4/b5/b6/b7/b8/b9/b10/b11/b12/b13/b14/b15/	y1/y2/y3/y4/y5/y6/y7/y8/y9/y10/y11/y12/y14/	2861	1741.91	4340	5	4602.92	1	1	1
2	17287	SunS_13_OVCAR3_HILIC_IntactGlycopeptide_F2.17287.17287.3.0.dta	4602.91	3	77.25	GLGFNLTELAEAEIHK	N5H6F0S3	6-5-3-0-0	-2	0	4	1	1	1	1	25	b2/b3/b4/b5/b6/b7/b8/b9/b10/b12/b13/b14/	y1/y2/y3/y4/y5/y6/y7/y8/y9/y10/y11/y12/y14/	2861	1741.91	2220	3	4602.92	1	1	1
2	17302	SunS_13_OVCAR3_HILIC_IntactGlycopeptide_F2.17302.17302.5.0.dta	4640.86	5	77.3	FMIQGGDFSNQNGTGGESIYGEK	N4H5F0S2	5-4-2-0-0	-2	0	1	0	0	0	1	6	b4/b9/b12/	y1/y10/y13/	2204.77	2436.09	#N/A	5	4640.85	1	0	0
2	17326	SunS_13_OVCAR3_HILIC_IntactGlycopeptide_F2.17326.17326.4.0.dta	4311.81	4	77.38	GLGFNLTELAEAEIHK	N5H6F0S2	6-5-2-0-0	-1	0	4	1	1	1	1	6		y2/y4/y5/y7/y8/y10/	2569.9	1741.9	#N/A	2	2156.91	0	1	0
2	17331	SunS_13_OVCAR3_HILIC_IntactGlycopeptide_F2.17331.17331.4.0.dta	4602.91	4	77.41	GLGFNLTELAEAEIHK	N5H6F0S3	6-5-3-0-0	-2	0	4	1	1	1	1	25	b2/b3/b5/b6/b7/b8/b9/b10/b11/b13/b14/b15/	y1/y2/y3/y4/y5/y6/y7/y8/y9/y10/y11/y12/y14/	2861	1741.91	4367	4	4602.94	1	1	1
2	17333	SunS_13_OVCAR3_HILIC_IntactGlycopeptide_F2.17333.17333.6.0.dta	4605.93	6	77.41	GLGFNLTELAEAEIHK	N7H8F1S0	8-7-0-1-0	-1	0	4	1	1	1	1	7		y2/y3/y5/y6/y7/y8/y10/	2864.04	1741.89	#N/A	2	1535.31	0	1	0
2	17353	SunS_13_OVCAR3_HILIC_IntactGlycopeptide_F2.17353.17353.3.0.dta	4602.91	3	77.51	GLGFNLTELAEAEIHK	N5H6F0S3	6-5-3-0-0	-2	0	4	1	1	1	1	16	b3/b4/b5/b6/b12/b13/	y2/y3/y4/y5/y6/y7/y8/y9/y10/y11/	2861	1741.91	2821	3	4602.92	1	1	1
2	17380	SunS_13_OVCAR3_HILIC_IntactGlycopeptide_F2.17380.17380.4.0.dta	4602.93	4	77.67	GLGFNLTELAEAEIHK	N5H6F0S3	6-5-3-0-0	-2	0	4	1	1	1	1	26	b2/b3/b4/b5/b6/b7/b8/b9/b10/b11/b12/b13/b14/	y1/y2/y3/y4/y5/y6/y7/y8/y9/y10/y11/y12/y14/	2861	1741.93	#N/A	4	4602.93	1	1	1
2	17382	SunS_13_OVCAR3_HILIC_IntactGlycopeptide_F2.17382.17382.5.0.dta	4602.92	5	77.67	GLGFNLTELAEAEIHK	N5H6F0S3	6-5-3-0-0	-2	0	4	1	1	1	1	16	b3/b6/b8/b10/	y1/y2/y3/y4/y5/y6/y7/y8/y9/y10/y11/y14/	2861	1741.92	#N/A	5	4602.92	1	1	1
2	17424	SunS_13_OVCAR3_HILIC_IntactGlycopeptide_F2.17424.17424.4.0.dta	4602.94	4	77.92	GLGFNLTELAEAEIHK	N5H6F0S3	6-5-3-0-0	-2	0	4	1	1	1	1	26	b2/b3/b4/b5/b6/b7/b8/b9/b10/b11/b12/b13/b14/	y1/y2/y3/y4/y5/y6/y7/y8/y9/y10/y11/y12/y14/	2861	1741.94	4380	4	4602.94	1	1	1
2	17426	SunS_13_OVCAR3_HILIC_IntactGlycopeptide_F2.17426.17426.5.0.dta	4602.93	5	77.93	GLGFNLTELAEAEIHK	N5H6F0S3	6-5-3-0-0	-2	0	4	1	1	1	1	16	b3/b6/b8/	y1/y2/y3/y4/y5/y6/y7/y8/y9/y10/y11/y12/y14/	2861	1741.93	3690	5	4602.92	1	1	1
2	17470	SunS_13_OVCAR3_HILIC_IntactGlycopeptide_F2.17470.17470.4.0.dta	4602.92	4	78.17	GLGFNLTELAEAEIHK	N5H6F0S3	6-5-3-0-0	-2	0	4	1	1	1	1	26	b2/b3/b4/b5/b6/b7/b8/b9/b10/b11/b12/b13/b14/	y1/y2/y3/y4/y5/y6/y7/y8/y9/y10/y11/y12/y14/	2861	1741.92	2409	4	4602.94	1	1	1
2	17472	SunS_13_OVCAR3_HILIC_IntactGlycopeptide_F2.17472.17472.5.0.dta	4602.91	5	78.18	GLGFNLTELAEAEIHK	N5H6F0S3	6-5-3-0-0	-3	0	4	1	1	1	1	14	b5/b6/b9/	y1/y2/y3/y4/y5/y6/y7/y8/y9/y10/y11/	2861	1741.91	3786	5	4602.92	1	1	1
2	17486	SunS_13_OVCAR3_HILIC_IntactGlycopeptide_F2.17486.17486.3.0.dta	4602.89	3	78.27	GLGFNLTELAEAEIHK	N5H6F0S3	6-5-3-0-0	-2	0	4	1	1	1	1	12	b3/b8/	y2/y3/y4/y5/y6/y7/y8/y9/y10/y11/	2861	1741.89	3479	3	4602.92	1	1	1
2	17512	SunS_13_OVCAR3_HILIC_IntactGlycopeptide_F2.17512.17512.4.0.dta	4602.91	4	78.43	GLGFNLTELAEAEIHK	N5H6F0S3	6-5-3-0-0	-2	0	4	1	1	1	1	26	b2/b3/b4/b5/b6/b7/b8/b9/b10/b11/b12/b13/b14/	y1/y2/y3/y4/y5/y6/y7/y8/y9/y10/y11/y12/y14/	2861	1741.91	4484	4	4602.94	1	1	1
2	17514	SunS_13_OVCAR3_HILIC_IntactGlycopeptide_F2.17514.17514.5.0.dta	4602.91	5	78.44	GLGFNLTELAEAEIHK	N5H6F0S3	6-5-3-0-0	-2	0	4	1	1	1	1	9		y2/y4/y5/y6/y7/y8/y9/y10/y11/	2861	1741.91	#N/A	5	4602.92	1	1	1
2	17554	SunS_13_OVCAR3_HILIC_IntactGlycopeptide_F2.17554.17554.4.0.dta	4602.92	4	78.69	GLGFNLTELAEAEIHK	N5H6F0S3	6-5-3-0-0	-2	0	4	1	1	1	1	23	b3/b4/b6/b7/b8/b9/b11/b13/b14/b15/	y1/y2/y3/y4/y5/y6/y7/y8/y9/y10/y11/y12/y14/	2861	1741.92	4638	4	4602.93	1	1	1
2	17555	SunS_13_OVCAR3_HILIC_IntactGlycopeptide_F2.17555.17555.3.0.dta	4602.93	3	78.69	GLGFNLTELAEAEIHK	N5H6F0S3	6-5-3-0-0	-2	0	4	1	1	1	1	6		y2/y5/y7/y8/y9/y10/	2861	1741.93	5330	3	4602.91	1	1	1
2	17557	SunS_13_OVCAR3_HILIC_IntactGlycopeptide_F2.17557.17557.5.0.dta	4602.9	5	78.7	GLGFNLTELAEAEIHK	N5H6F0S3	6-5-3-0-0	-2	0	4	1	1	1	1	9		y2/y3/y4/y5/y6/y7/y8/y9/y10/	2861	1741.9	5390	5	4602.92	1	1	1
2	17598	SunS_13_OVCAR3_HILIC_IntactGlycopeptide_F2.17598.17598.4.0.dta	4602.9	4	78.95	GLGFNLTELAEAEIHK	N5H6F0S3	6-5-3-0-0	-2	0	4	1	1	1	1	14	b3/b6/b7/	y2/y3/y4/y5/y6/y7/y8/y9/y10/y11/y12/	2861	1741.9	#N/A	4	4602.93	1	1	1
2	17639	SunS_13_OVCAR3_HILIC_IntactGlycopeptide_F2.17639.17639.4.0.dta	4602.9	4	79.21	GLGFNLTELAEAEIHK	N5H6F0S3	6-5-3-0-0	-2	0	4	1	1	1	1	13	b3/b6/b14/	y2/y3/y4/y5/y6/y7/y8/y9/y10/y11/	2861	1741.9	4656	4	4602.92	1	1	1
2	17680	SunS_13_OVCAR3_HILIC_IntactGlycopeptide_F2.17680.17680.4.0.dta	4602.92	4	79.46	GLGFNLTELAEAEIHK	N5H6F0S3	6-5-3-0-0	-2	0	4	1	1	1	1	11	b3/	y2/y3/y4/y5/y6/y7/y8/y9/y10/y14/	2861	1741.92	5150	4	4602.92	1	1	1
2	17722	SunS_13_OVCAR3_HILIC_IntactGlycopeptide_F2.17722.17722.4.0.dta	4602.92	4	79.72	GLGFNLTELAEAEIHK	N5H6F0S3	6-5-3-0-0	-2	0	4	1	1	1	1	11	b6/	y2/y3/y4/y5/y6/y7/y8/y9/y10/y11/	2861	1741.92	3168	4	4602.92	1	1	1
2	17808	SunS_13_OVCAR3_HILIC_IntactGlycopeptide_F2.17808.17808.4.0.dta	4602.92	4	80.23	GLGFNLTELAEAEIHK	N5H6F0S3	6-5-3-0-0	-2	0	4	1	1	1	1	8	b6/	y2/y5/y6/y7/y8/y10/y11/	2861	1741.92	5640	4	4602.91	1	1	1
2	17851	SunS_13_OVCAR3_HILIC_IntactGlycopeptide_F2.17851.17851.4.0.dta	4602.9	4	80.48	GLGFNLTELAEAEIHK	N5H6F0S3	6-5-3-0-0	-2	0	4	1	1	1	1	9		y2/y3/y5/y6/y7/y8/y9/y10/y14/	2861	1741.9	4095	4	4602.92	1	1	1
2	18810	SunS_13_OVCAR3_HILIC_IntactGlycopeptide_F2.18810.18810.4.0.dta	5025.03	4	86.53	SITFNETYQDISEVVYGAK	N5H6F0S3	6-5-3-0-0	-2	0	2	0	1	1	0	14	b2/b6/	y1/y3/y4/y5/y6/y7/y8/y9/y10/y11/y12/y13/	2861	2164.03	2787	4	5025.05	1	1	1
2	19012	SunS_13_OVCAR3_HILIC_IntactGlycopeptide_F2.19012.19012.4.0.dta	5025.04	4	87.8	SITFNETYQDISEVVYGAK	N5H6F0S3	6-5-3-0-0	-2	0	3	1	1	1	0	19	b2/b3/b6/b9/	y1/y2/y3/y4/y5/y6/y7/y8/y9/y10/y11/y12/y13/y14/y15/	2861	2164.04	2677	4	5025.05	1	1	1
3	3705	SunS_13_OVCAR3_HILIC_IntactGlycopeptide_F3.3705.3705.3.0.dta	3909.58	3	23.16	YPHNHHVVNNTLEGNCSSK	N2H8F0S0	8-2-0-0-0	-1	0	2	0	1	0	1	12	b1/b3/b5/b6/b7/b8/	y4/y6/y7/y8/y9/y10/	1702.58	2207	#N/A	3	3909.59	1	0	0
3	4054	SunS_13_OVCAR3_HILIC_IntactGlycopeptide_F3.4054.4054.4.0.dta	4862.91	4	24.48	YVHNHNTYTNNENCSSPSWQAQHESR	N2H8F0S0	8-2-0-0-0	-2	0	2	0	1	0	1	24	b1/b3/b4/b5/b6/b7/b8/b9/b10/b11/b12/	y1/y2/y3/y4/y5/y6/y7/y8/y9/y10/y11/y12/y14/	1702.58	3160.33	#N/A	4	4862.91	1	0	0
3	4055	SunS_13_OVCAR3_HILIC_IntactGlycopeptide_F3.4055.4055.4.0.dta	5024.96	4	24.48	YVHNHNTYTNNENCSSPSWQAQHESR	N2H9F0S0	9-2-0-0-0	-2	0	1	0	0	0	1	10	b4/b10/	y1/y2/y3/y4/y6/y7/y10/y14/	1864.63	3160.32	#N/A	4	5024.96	1	0	0
3	4262	SunS_13_OVCAR3_HILIC_IntactGlycopeptide_F3.4262.4262.3.0.dta	3174.3	3	25.17	SIHENATGDLATSR	N2H8F0S0	8-2-0-0-0	-1	0	4	1	1	1	1	9	b3/b4/	y3/y4/y5/y6/y7/y8/y9/	1702.58	1471.71	775	3	3174.3	1	1	1
3	4819	SunS_13_OVCAR3_HILIC_IntactGlycopeptide_F3.4819.4819.4.0.dta	4286.68	4	26.77	DSEAFCHANCSGPAPAAKPDPDGGR	N2H8F0S0	8-2-0-0-0	-2	0	2	0	1	0	1	11	b3/b4/b8/	y1/y3/y5/y6/y7/y8/y9/y11/	1702.58	2584.1	#N/A	4	4286.68	1	0	0
3	4869	SunS_13_OVCAR3_HILIC_IntactGlycopeptide_F3.4869.4869.3.0.dta	3962.58	3	26.89	DSEAFCHANCSGPAPAAKPDPDGGR	N2H6F0S0	6-2-0-0-0	-2	0	2	0	1	0	1	14	b3/b4/b7/b8/b14/b20/	y1/y3/y5/y7/y8/y9/y11/y13/	1378.48	2584.11	#N/A	3	3962.58	1	0	0
3	4879	SunS_13_OVCAR3_HILIC_IntactGlycopeptide_F3.4879.4879.4.0.dta	3962.59	4	26.92	DSEAFCHANCSGPAPAAKPDPDGGR	N2H6F0S0	6-2-0-0-0	0	0	2	0	1	0	1	16	b2/b3/b4/b7/b8/b14/	y1/y2/y3/y5/y7/y8/y9/y10/y11/y13/	1378.48	2584.11	#N/A	4	3962.59	1	0	0
3	4972	SunS_13_OVCAR3_HILIC_IntactGlycopeptide_F3.4972.4972.3.0.dta	3268.42	3	27.17	WTGHNVTVVQR	N5H5F1S0	5-5-0-1-0	-1	0	4	1	1	1	1	8	b1/b7/	y1/y2/y3/y4/y5/y6/	1971.72	1296.7	1927	3	3268.41	1	1	1
3	5023	SunS_13_OVCAR3_HILIC_IntactGlycopeptide_F3.5023.5023.3.0.dta	3314.38	3	27.31	HAVYWNSSNQHLR	N2H8F0S0	8-2-0-0-0	-2	0	4	1	1	1	1	9	b2/b3/b4/b5/	y1/y2/y3/y6/y7/	1702.58	1611.8	2209	3	3314.36	1	1	1
3	5148	SunS_13_OVCAR3_HILIC_IntactGlycopeptide_F3.5148.5148.3.0.dta	3248.35	3	27.67	QNGSASSVAGPASGLDK	N2H8F0S0	8-2-0-0-0	-1	0	4	1	1	1	1	17	b5/b9/b10/	y1/y2/y3/y4/y5/y7/y8/y9/y10/y11/y12/y13/y14/y15/	1702.58	1545.77	219	3	3248.35	1	1	1
3	5241	SunS_13_OVCAR3_HILIC_IntactGlycopeptide_F3.5241.5241.3.0.dta	2924.24	3	27.97	QNGSASSVAGPASGLDK	N2H6F0S0	6-2-0-0-0	-1	0	4	1	1	1	1	15	b2/b4/b9/	y1/y4/y5/y7/y8/y9/y10/y11/y12/y13/y14/y15/	1378.48	1545.77	120	3	2924.24	1	1	1
3	5337	SunS_13_OVCAR3_HILIC_IntactGlycopeptide_F3.5337.5337.5.0.dta	3946.72	5	28.21	YPHKPEINSTTHPGADLR	N4H5F0S1	5-4-1-0-0	-1	0	3	0	1	1	1	9	b3/b4/	y1/y2/y6/y7/y9/y10/y14/	1913.68	2033.04	5301	5	3946.71	1	1	1
3	5345	SunS_13_OVCAR3_HILIC_IntactGlycopeptide_F3.5345.5345.4.0.dta	3946.7	4	28.24	YPHKPEINSTTHPGADLR	N4H5F0S1	5-4-1-0-0	-2	0	4	1	1	1	1	16	b2/b3/b4/b6/b7/b8/	y1/y2/y3/y5/y6/y7/y8/y9/y10/y14/	1913.68	2033.02	4714	4	3946.71	1	1	1
3	5359	SunS_13_OVCAR3_HILIC_IntactGlycopeptide_F3.5359.5359.3.0.dta	3946.69	3	28.27	YPHKPEINSTTHPGADLR	N4H5F0S1	5-4-1-0-0	0	0	3	0	1	1	1	9	b3/b4/	y1/y2/y6/y7/y8/y10/y14/	1913.68	2033.01	4229	3	3946.7	1	1	1
3	5379	SunS_13_OVCAR3_HILIC_IntactGlycopeptide_F3.5379.5379.4.0.dta	3743.63	4	28.32	YPHKPEINSTTHPGADLR	N3H5F0S1	5-3-1-0-0	-2	0	2	0	1	0	1	15	b2/b3/b4/b7/b8/	y1/y2/y3/y5/y6/y7/y8/y9/y10/y14/	1710.6	2033.03	4740	4	3743.62	1	1	1
3	5454	SunS_13_OVCAR3_HILIC_IntactGlycopeptide_F3.5454.5454.4.0.dta	3946.69	4	28.5	YPHKPEINSTTHPGADLR	N4H5F0S1	5-4-1-0-0	-2	0	3	0	1	1	1	7	b3/b4/	y1/y2/y6/y7/y9/	1913.68	2033.01	#N/A	2	1973.85	0	1	0
3	5463	SunS_13_OVCAR3_HILIC_IntactGlycopeptide_F3.5463.5463.3.0.dta	2737.14	3	28.52	HVVYWNSSNPR	N2H6F0S0	6-2-0-0-0	-1	0	4	1	1	1	1	6	b2/b3/b4/	y1/y2/y9/	1378.48	1358.66	#N/A	3	2737.14	1	0	0
3	5782	SunS_13_OVCAR3_HILIC_IntactGlycopeptide_F3.5782.5782.4.0.dta	3968.55	4	29.34	VWQGHANASFCPHGYGCR	N2H9F0S0	9-2-0-0-0	0	0	4	1	1	1	1	24	b2/b3/b4/b5/b6/b7/b8/b9/b10/b11/b13/	y1/y2/y3/y4/y5/y6/y7/y8/y9/y10/y11/y12/y13/	1864.63	2103.91	#N/A	4	3968.56	1	0	0
3	5785	SunS_13_OVCAR3_HILIC_IntactGlycopeptide_F3.5785.5785.3.0.dta	3968.54	3	29.34	VWQGHANASFCPHGYGCR	N2H9F0S0	9-2-0-0-0	-2	0	4	1	1	1	1	24	b2/b3/b4/b5/b6/b7/b8/b9/b10/b11/b13/	y1/y2/y3/y4/y5/y6/y7/y8/y9/y10/y11/y12/y13/	1864.63	2103.91	#N/A	3	3968.56	1	0	0
3	5788	SunS_13_OVCAR3_HILIC_IntactGlycopeptide_F3.5788.5788.3.0.dta	2999.18	3	29.35	NSSVGPLYSGCR	N2H8F0S0	8-2-0-0-0	-1	0	3	1	1	1	0	9	b2/	y1/y3/y4/y5/y7/y8/y9/y10/	1702.58	1296.6	524	3	2999.19	1	1	1
3	5803	SunS_13_OVCAR3_HILIC_IntactGlycopeptide_F3.5803.5803.4.0.dta	3806.5	4	29.39	VWQGHANASFCPHGYGCR	N2H8F0S0	8-2-0-0-0	0	0	3	0	1	1	1	16	b2/b3/b5/b6/b8/b9/	y1/y3/y4/y5/y6/y7/y8/y9/y10/y11/	1702.58	2103.91	12640	4	3806.51	1	0	0
3	5808	SunS_13_OVCAR3_HILIC_IntactGlycopeptide_F3.5808.5808.3.0.dta	3806.5	3	29.4	VWQGHANASFCPHGYGCR	N2H8F0S0	8-2-0-0-0	0	0	3	0	1	1	1	16	b2/b3/b5/b6/b7/b8/	y1/y3/y4/y5/y6/y7/y8/y9/y10/y11/	1702.58	2103.92	#N/A	3	3806.5	1	0	0
3	5818	SunS_13_OVCAR3_HILIC_IntactGlycopeptide_F3.5818.5818.3.0.dta	2651.17	3	29.44	TLSPTGNISSAPK	N2H6F0S0	6-2-0-0-0	0	0	3	1	0	1	1	10	b2/b3/b8/b11/	y2/y3/y5/y6/y10/y11/	1378.48	1272.69	1649	3	2651.17	1	1	1
3	5836	SunS_13_OVCAR3_HILIC_IntactGlycopeptide_F3.5836.5836.3.0.dta	3414.4	3	29.5	NSSVGPLYSGCR	N5H5F2S0	5-5-0-2-0	-1	0	2	1	0	1	0	7		y1/y4/y5/y7/y8/y9/y10/	2117.78	1296.62	#N/A	3	3413.42	0	1	0
3	5882	SunS_13_OVCAR3_HILIC_IntactGlycopeptide_F3.5882.5882.3.0.dta	3252.34	3	29.65	NSSVGPLYSGCR	N5H4F2S0	4-5-0-2-0	-1	0	2	1	0	1	0	8		y1/y2/y4/y7/y8/y9/y10/y11/	1955.72	1296.62	2684	3	3252.35	1	1	1
3	5909	SunS_13_OVCAR3_HILIC_IntactGlycopeptide_F3.5909.5909.4.0.dta	3268.35	4	29.74	NSSVGPLYSGCR	N5H5F1S0	5-5-0-1-0	-1	0	2	1	0	1	0	8	b2/	y1/y4/y5/y7/y8/y9/y10/	1971.72	1296.63	1381	4	3268.34	1	1	1
3	6180	SunS_13_OVCAR3_HILIC_IntactGlycopeptide_F3.6180.6180.3.0.dta	3183.32	3	30.59	IDSTGNVTNELR	N2H9F0S0	9-2-0-0-0	-1	0	3	1	0	1	1	9	b2/b9/	y1/y2/y4/y5/y6/y8/y10/	1864.63	1318.68	407	3	3183.32	1	1	1
3	6192	SunS_13_OVCAR3_HILIC_IntactGlycopeptide_F3.6192.6192.3.0.dta	3021.25	3	30.64	IDSTGNVTNELR	N2H8F0S0	8-2-0-0-0	-1	0	4	1	1	1	1	8	b2/b7/	y1/y2/y4/y5/y6/y10/	1702.58	1318.67	643	3	3021.26	1	1	1
3	6263	SunS_13_OVCAR3_HILIC_IntactGlycopeptide_F3.6263.6263.3.0.dta	3564.53	3	30.91	MHLNGSNVQVLHR	N4H5F1S1	5-4-1-1-0	0	0	4	1	1	1	1	6	b2/b3/	y1/y2/y5/y9/	2059.73	1504.8	6527	3	3564.54	1	0	0
3	6296	SunS_13_OVCAR3_HILIC_IntactGlycopeptide_F3.6296.6296.4.0.dta	3807.63	4	31.03	FTFTSHTPGEHQICLHSNSTK	N2H6F0S0	6-2-0-0-0	0	0	2	0	1	0	1	7	b2/b6/b7/b10/	y5/y8/y14/	1378.48	2429.16	5351	4	3807.63	1	1	1
3	6331	SunS_13_OVCAR3_HILIC_IntactGlycopeptide_F3.6331.6331.3.0.dta	3280.33	3	31.13	WGHNITEFQQR	N2H9F0S0	9-2-0-0-0	-1	0	4	1	1	1	1	16	b1/b3/b4/b5/b6/b7/b8/b10/	y1/y2/y3/y4/y5/y6/y7/y8/	1864.63	1415.7	564	3	3280.34	1	1	1
3	6346	SunS_13_OVCAR3_HILIC_IntactGlycopeptide_F3.6346.6346.3.0.dta	3118.27	3	31.19	WGHNITEFQQR	N2H8F0S0	8-2-0-0-0	0	0	4	1	1	1	1	13	b1/b3/b4/b5/b6/	y1/y2/y3/y4/y5/y6/y7/y8/	1702.58	1415.69	930	3	3118.29	1	1	1
3	6371	SunS_13_OVCAR3_HILIC_IntactGlycopeptide_F3.6371.6371.3.0.dta	3268.4	3	31.29	THNLTDLSPHLR	N2H9F0S0	9-2-0-0-0	0	0	4	1	1	1	1	12	b2/b4/b7/	y1/y2/y4/y5/y6/y7/y8/y9/y10/	1864.63	1403.76	606	3	3268.39	1	1	1
3	6386	SunS_13_OVCAR3_HILIC_IntactGlycopeptide_F3.6386.6386.3.0.dta	4215.67	3	31.34	LRNPCTSEQNCTSPFSYK	N2H10F0S0	10-2-0-0-0	-2	0	4	1	1	1	1	17	b2/b3/b5/b6/b7/b8/b9/b12/b13/	y1/y2/y3/y5/y6/y7/y9/y13/	2026.69	2188.99	3463	3	4215.69	1	1	1
3	6387	SunS_13_OVCAR3_HILIC_IntactGlycopeptide_F3.6387.6387.3.0.dta	2334.04	3	31.34	VQPFNVTQGK	N2H5F0S0	5-2-0-0-0	0	0	2	1	0	1	0	10	b2/b3/b6/b8/	y1/y2/y4/y5/y6/y8/	1216.42	1117.62	1766	3	2334.04	1	1	1
3	6396	SunS_13_OVCAR3_HILIC_IntactGlycopeptide_F3.6396.6396.3.0.dta	4053.63	3	31.38	LRNPCTSEQNCTSPFSYK	N2H9F0S0	9-2-0-0-0	0	0	4	1	1	1	1	19	b2/b3/b5/b6/b7/b8/b9/b12/b13/b16/	y1/y2/y3/y4/y5/y6/y7/y8/y13/	1864.63	2189	3074	3	4053.63	1	1	1
3	6401	SunS_13_OVCAR3_HILIC_IntactGlycopeptide_F3.6401.6401.3.0.dta	2956.22	3	31.39	WGHNITEFQQR	N2H7F0S0	7-2-0-0-0	-1	0	4	1	1	1	1	13	b1/b3/b4/b5/b6/	y1/y2/y3/y4/y5/y6/y7/y8/	1540.53	1415.69	482	3	2956.23	1	1	1
3	6402	SunS_13_OVCAR3_HILIC_IntactGlycopeptide_F3.6402.6402.4.0.dta	4215.68	4	31.39	LRNPCTSEQNCTSPFSYK	N2H10F0S0	10-2-0-0-0	0	0	2	0	1	0	1	10	b3/b5/b7/b9/	y1/y3/y5/y6/y7/y8/	2026.69	2188.99	5452	4	4215.68	1	1	1
3	6406	SunS_13_OVCAR3_HILIC_IntactGlycopeptide_F3.6406.6406.3.0.dta	3280.34	3	31.41	WGHNITEFQQR	N2H9F0S0	9-2-0-0-0	0	0	4	1	1	1	1	12	b1/b3/b5/b6/	y1/y2/y3/y4/y5/y6/y7/y8/	1864.63	1415.7	945	3	3280.33	1	1	1
3	6407	SunS_13_OVCAR3_HILIC_IntactGlycopeptide_F3.6407.6407.4.0.dta	4053.62	4	31.41	LRNPCTSEQNCTSPFSYK	N2H9F0S0	9-2-0-0-0	0	0	4	1	1	1	1	15	b2/b3/b5/b6/b7/b8/b9/b12/	y1/y2/y3/y5/y6/y7/y8/	1864.63	2188.99	3759	4	4053.63	1	1	1
3	6419	SunS_13_OVCAR3_HILIC_IntactGlycopeptide_F3.6419.6419.3.0.dta	3891.57	3	31.45	LRNPCTSEQNCTSPFSYK	N2H8F0S0	8-2-0-0-0	-2	0	4	1	1	1	1	21	b2/b3/b5/b6/b7/b8/b9/b10/b11/b12/b13/	y1/y2/y3/y5/y6/y7/y8/y9/y11/y13/	1702.58	2188.99	2398	3	3891.58	1	1	1
3	6420	SunS_13_OVCAR3_HILIC_IntactGlycopeptide_F3.6420.6420.3.0.dta	2944.29	3	31.45	THNLTDLSPHLR	N2H7F0S0	7-2-0-0-0	-1	0	4	1	1	1	1	13	b2/b4/b6/b7/	y1/y2/y4/y5/y6/y7/y8/y9/y10/	1540.53	1403.76	438	3	2944.29	1	1	1
3	6423	SunS_13_OVCAR3_HILIC_IntactGlycopeptide_F3.6423.6423.4.0.dta	3891.57	4	31.46	LRNPCTSEQNCTSPFSYK	N2H8F0S0	8-2-0-0-0	0	0	3	0	1	1	1	15	b2/b3/b5/b6/b7/b8/b9/b12/	y1/y2/y3/y5/y6/y7/y8/	1702.58	2188.98	4408	4	3891.58	1	1	1
3	6433	SunS_13_OVCAR3_HILIC_IntactGlycopeptide_F3.6433.6433.3.0.dta	2794.18	3	31.49	WGHNITEFQQR	N2H6F0S0	6-2-0-0-0	0	0	4	1	1	1	1	13	b1/b3/b4/b5/b6/	y1/y2/y3/y4/y5/y6/y7/y8/	1378.48	1415.7	2485	3	2794.17	1	1	1
3	6459	SunS_13_OVCAR3_HILIC_IntactGlycopeptide_F3.6459.6459.3.0.dta	2782.24	3	31.57	THNLTDLSPHLR	N2H6F0S0	6-2-0-0-0	0	0	4	1	1	1	1	12	b2/b4/b7/b8/	y1/y4/y5/y6/y7/y8/y9/y10/	1378.48	1403.76	835	3	2782.23	1	1	1
3	6499	SunS_13_OVCAR3_HILIC_IntactGlycopeptide_F3.6499.6499.3.0.dta	3567.46	3	31.69	LRNPCTSEQNCTSPFSYK	N2H6F0S0	6-2-0-0-0	-2	0	4	1	1	1	1	21	b2/b3/b5/b6/b7/b8/b9/b11/b12/b13/	y1/y2/y3/y4/y5/y6/y7/y8/y9/y11/y13/	1378.48	2188.98	2522	3	3567.47	1	1	1
3	6509	SunS_13_OVCAR3_HILIC_IntactGlycopeptide_F3.6509.6509.3.0.dta	3891.57	3	31.72	LRNPCTSEQNCTSPFSYK	N2H8F0S0	8-2-0-0-0	-2	0	2	0	1	0	1	15	b2/b3/b5/b6/b7/b8/b9/b12/	y1/y2/y3/y5/y6/y7/y8/	1702.58	2188.99	3398	3	3891.57	1	1	1
3	6526	SunS_13_OVCAR3_HILIC_IntactGlycopeptide_F3.6526.6526.4.0.dta	4160.71	4	31.76	LRNPCTSEQNCTSPFSYK	N5H5F1S0	5-5-0-1-0	-2	0	3	0	1	1	1	6	b5/b8/b9/	y1/y3/y5/	1971.72	2188.99	5170	4	4160.71	1	1	1
3	6530	SunS_13_OVCAR3_HILIC_IntactGlycopeptide_F3.6530.6530.3.0.dta	2620.18	3	31.77	THNLTDLSPHLR	N2H5F0S0	5-2-0-0-0	-1	0	4	1	1	1	1	13	b2/b3/b4/b7/	y1/y2/y4/y5/y6/y7/y8/y9/y10/	1216.42	1403.76	503	3	2620.18	1	1	1
3	6647	SunS_13_OVCAR3_HILIC_IntactGlycopeptide_F3.6647.6647.4.0.dta	4104.8	4	32.1	TVAQNYSSVTHLHSIGK	N5H5F1S1	5-5-1-1-0	0	0	4	1	1	1	1	8	b6/	y3/y4/y5/y7/y8/y10/y11/	2262.81	1841.99	5871	4	4104.79	1	1	1
3	6908	SunS_13_OVCAR3_HILIC_IntactGlycopeptide_F3.6908.6908.3.0.dta	3783.55	3	32.88	FSDSLDSNSSTQFEVKK	N2H9F0S0	9-2-0-0-0	-2	0	4	1	1	1	1	15	b2/b4/b5/b6/	y1/y2/y3/y4/y5/y6/y7/y8/y9/y11/y12/	1864.63	1918.92	3977	3	3783.55	1	1	1
3	6948	SunS_13_OVCAR3_HILIC_IntactGlycopeptide_F3.6948.6948.3.0.dta	3809.56	3	33.02	KDTCTQECSYFNITK	N4H5F2S0	5-4-0-2-0	-1	0	4	1	1	1	1	9	b1/b5/b7/b10/b11/b13/	y2/y3/y8/	1914.7	1894.86	3208	3	3809.55	1	1	1
3	6950	SunS_13_OVCAR3_HILIC_IntactGlycopeptide_F3.6950.6950.4.0.dta	3666.73	4	33.02	IAPASNVSHTVVLRPLK	N2H9F0S0	9-2-0-0-0	0	0	4	1	1	1	1	9	b2/	y3/y4/y5/y6/y7/y8/y9/y10/	1864.63	1802.09	6785	4	3666.73	1	1	1
3	6989	SunS_13_OVCAR3_HILIC_IntactGlycopeptide_F3.6989.6989.3.0.dta	3852.66	3	33.15	IRINTTADEKDPTNPFR	N2H9F0S0	9-2-0-0-0	-2	0	2	0	1	0	1	6		y1/y3/y6/y7/y8/y9/	1864.63	1988.03	5880	3	3852.68	1	1	1
3	7065	SunS_13_OVCAR3_HILIC_IntactGlycopeptide_F3.7065.7065.3.0.dta	3314.43	3	33.4	KDVNYTQIVVDR	N2H9F0S0	9-2-0-0-0	-1	0	4	1	1	1	1	15	b1/b2/b3/b5/	y1/y2/y3/y4/y5/y6/y7/y8/y9/y10/y11/	1864.63	1449.8	898	3	3314.43	1	1	1
3	7241	SunS_13_OVCAR3_HILIC_IntactGlycopeptide_F3.7241.7241.4.0.dta	4501.85	4	33.99	MDKSDAVSHTGNYTCEVTELTR	N5H6F0S0	6-5-0-0-0	-2	0	2	0	1	0	1	7		y1/y3/y4/y5/y6/y8/y9/	1987.71	2514.14	6096	4	4501.86	1	0	0
3	7242	SunS_13_OVCAR3_HILIC_IntactGlycopeptide_F3.7242.7242.4.0.dta	4241.77	4	33.99	MDKSDAVSHTGNYTCEVTELTR	N3H6F1S0	6-3-0-1-0	-1	0	2	0	1	0	1	6		y1/y3/y5/y6/y8/y9/	1727.61	2514.15	#N/A	4	4241.76	1	0	0
3	7282	SunS_13_OVCAR3_HILIC_IntactGlycopeptide_F3.7282.7282.4.0.dta	4095.68	4	34.12	MDKSDAVSHTGNYTCEVTELTR	N3H6F0S0	6-3-0-0-0	-1	0	2	0	1	0	1	8		y1/y2/y3/y5/y6/y7/y8/y9/	1581.56	2514.12	6238	4	4095.68	1	0	0
3	7339	SunS_13_OVCAR3_HILIC_IntactGlycopeptide_F3.7339.7339.3.0.dta	3241.34	3	34.34	KQNNGAFNETLFR	N2H8F0S0	8-2-0-0-0	-1	0	4	1	1	1	1	9	b1/b2/b11/	y1/y2/y3/y4/y5/y9/	1702.58	1538.76	5085	3	3241.35	1	1	1
3	7518	SunS_13_OVCAR3_HILIC_IntactGlycopeptide_F3.7518.7518.3.0.dta	2700.14	3	34.87	GHTLTLNFTR	N2H7F0S0	7-2-0-0-0	0	0	4	1	1	1	1	15	b2/b3/b4/b5/b6/b7/b8/b9/	y1/y2/y3/y4/y5/y6/y8/	1540.53	1159.62	244	3	2700.14	1	1	1
3	7555	SunS_13_OVCAR3_HILIC_IntactGlycopeptide_F3.7555.7555.3.0.dta	3195.3	3	34.97	EGSLPGNSTISIR	N2H9F0S0	9-2-0-0-0	-2	0	3	1	0	1	1	8	b2/b3/b4/	y1/y3/y4/y5/y9/	1864.63	1330.67	2048	3	3195.31	1	1	1
3	7601	SunS_13_OVCAR3_HILIC_IntactGlycopeptide_F3.7601.7601.4.0.dta	4216.7	4	35.11	MDKSDAVSHTGNYTCEVTELTR	N2H8F0S0	8-2-0-0-0	-2	0	2	0	1	0	1	22	b2/b3/b4/b5/b6/b7/b8/b9/b10/b11/b13/	y1/y2/y3/y4/y5/y6/y7/y8/y9/y10/y13/	1702.58	2514.12	#N/A	4	4216.69	1	0	0
3	7605	SunS_13_OVCAR3_HILIC_IntactGlycopeptide_F3.7605.7605.3.0.dta	2700.14	3	35.13	GHTLTLNFTR	N2H7F0S0	7-2-0-0-0	0	0	4	1	1	1	1	13	b2/b3/b4/b5/b6/b7/b8/	y1/y2/y3/y4/y6/y8/	1540.53	1159.61	213	3	2700.14	1	1	1
3	7607	SunS_13_OVCAR3_HILIC_IntactGlycopeptide_F3.7607.7607.4.0.dta	4485.83	4	35.13	MDKSDAVSHTGNYTCEVTELTR	N5H5F1S0	5-5-0-1-0	-2	0	2	0	1	0	1	8	b7/b9/	y1/y3/y5/y6/y8/y9/	1971.72	2514.11	#N/A	4	4485.83	1	0	0
3	7621	SunS_13_OVCAR3_HILIC_IntactGlycopeptide_F3.7621.7621.4.0.dta	4054.63	4	35.18	MDKSDAVSHTGNYTCEVTELTR	N2H7F0S0	7-2-0-0-0	0	0	2	0	1	0	1	17	b3/b5/b7/b8/b9/b10/	y1/y2/y3/y4/y5/y6/y7/y8/y9/y10/y13/	1540.53	2514.1	4143	4	4054.64	1	0	0
3	7633	SunS_13_OVCAR3_HILIC_IntactGlycopeptide_F3.7633.7633.4.0.dta	4323.77	4	35.21	MDKSDAVSHTGNYTCEVTELTR	N5H4F1S0	4-5-0-1-0	0	0	3	0	1	1	1	13	b5/b6/b7/b9/b10/	y1/y3/y5/y6/y8/y9/y10/y13/	1809.67	2514.1	#N/A	4	4323.78	1	0	0
3	7634	SunS_13_OVCAR3_HILIC_IntactGlycopeptide_F3.7634.7634.3.0.dta	2376.04	3	35.22	GHTLTLNFTR	N2H5F0S0	5-2-0-0-0	0	0	4	1	1	1	1	7	b2/b3/b4/b5/	y1/y3/y8/	1216.42	1159.61	774	3	2376.04	1	1	1
3	7644	SunS_13_OVCAR3_HILIC_IntactGlycopeptide_F3.7644.7644.4.0.dta	4079.67	4	35.25	MDKSDAVSHTGNYTCEVTELTR	N3H5F1S0	5-3-0-1-0	-1	0	2	0	1	0	1	10	b5/b6/b7/b9/	y1/y3/y5/y6/y7/y8/	1565.56	2514.11	9731	4	4079.67	1	0	0
3	7647	SunS_13_OVCAR3_HILIC_IntactGlycopeptide_F3.7647.7647.3.0.dta	2538.08	3	35.26	GHTLTLNFTR	N2H6F0S0	6-2-0-0-0	0	0	4	1	1	1	1	11	b2/b3/b4/b5/b6/b8/	y1/y2/y3/y6/y8/	1378.48	1159.61	340	3	2538.09	1	1	1
3	7650	SunS_13_OVCAR3_HILIC_IntactGlycopeptide_F3.7650.7650.3.0.dta	4323.79	3	35.27	MDKSDAVSHTGNYTCEVTELTR	N5H4F1S0	4-5-0-1-0	-2	0	2	0	1	0	1	7	b5/b7/b9/	y1/y3/y9/y10/	1809.67	2514.12	#N/A	3	4323.78	1	0	0
3	7651	SunS_13_OVCAR3_HILIC_IntactGlycopeptide_F3.7651.7651.3.0.dta	3191.27	3	35.27	NTSVGLLYSGCR	N2H9F0S0	9-2-0-0-0	-1	0	2	1	0	1	0	10	b2/	y1/y3/y4/y5/y6/y7/y8/y9/y10/	1864.63	1326.63	179	3	3191.27	1	1	1
3	7660	SunS_13_OVCAR3_HILIC_IntactGlycopeptide_F3.7660.7660.3.0.dta	3248.44	3	35.3	KNLTLMATTSQLPK	N2H8F0S0	8-2-0-0-0	-1	0	4	1	1	1	1	11	b1/b12/	y1/y2/y3/y7/y8/y9/y10/y11/y12/	1702.58	1545.86	9538	3	3248.44	1	0	0
3	7674	SunS_13_OVCAR3_HILIC_IntactGlycopeptide_F3.7674.7674.3.0.dta	3229.28	3	35.35	LQFDDNGTYTCQVK	N2H7F0S0	7-2-0-0-0	-1	0	2	1	0	1	0	10	b2/b13/	y1/y4/y5/y6/y7/y8/y11/y12/	1540.53	1688.75	1370	3	3229.28	1	1	1
3	7693	SunS_13_OVCAR3_HILIC_IntactGlycopeptide_F3.7693.7693.3.0.dta	3029.22	3	35.42	NTSVGLLYSGCR	N2H8F0S0	8-2-0-0-0	-1	0	2	1	0	1	0	11	b2/	y1/y3/y4/y5/y6/y7/y8/y9/y10/y11/	1702.58	1326.64	2150	3	3029.22	1	1	1
3	7694	SunS_13_OVCAR3_HILIC_IntactGlycopeptide_F3.7694.7694.3.0.dta	3086.4	3	35.42	KNLTLMATTSQLPK	N2H7F0S0	7-2-0-0-0	-1	0	4	1	1	1	1	14	b1/b3/b5/b12/	y2/y3/y5/y6/y7/y8/y9/y10/y11/y12/	1540.53	1545.87	7311	3	3086.4	1	0	0
3	7782	SunS_13_OVCAR3_HILIC_IntactGlycopeptide_F3.7782.7782.3.0.dta	3444.41	3	35.71	NTSVGLLYSGCR	N5H5F2S0	5-5-0-2-0	-1	0	2	1	0	1	0	6		y1/y3/y4/y5/y6/y8/	2117.78	1326.63	2278	3	3444.42	1	1	1
3	7834	SunS_13_OVCAR3_HILIC_IntactGlycopeptide_F3.7834.7834.3.0.dta	3298.36	3	35.91	NTSVGLLYSGCR	N5H5F1S0	5-5-0-1-0	0	0	2	1	0	1	0	7		y1/y4/y5/y6/y8/y9/y10/	1971.72	1326.64	2296	3	3298.37	1	1	1
3	7863	SunS_13_OVCAR3_HILIC_IntactGlycopeptide_F3.7863.7863.3.0.dta	3757.56	3	36.03	GQTEIQVNCPPAVTENK	N3H6F0S1	6-3-1-0-0	-1	0	3	1	0	1	1	9	b4/b5/b7/b9/b13/	y4/y7/y8/y10/	1872.65	1884.91	5849	3	3757.56	1	1	1
3	8064	SunS_13_OVCAR3_HILIC_IntactGlycopeptide_F3.8064.8064.3.0.dta	2761.08	3	36.84	GYNVTYWR	N2H8F0S0	8-2-0-0-0	0	0	2	1	0	1	0	6		y1/y2/y3/y4/y5/y6/	1702.58	1058.5	1567	3	2761.09	1	1	1
3	8429	SunS_13_OVCAR3_HILIC_IntactGlycopeptide_F3.8429.8429.3.0.dta	3632.46	3	37.99	VYCNLSAAHTFEDLK	N2H9F0S0	9-2-0-0-0	-2	0	4	1	1	1	1	16	b2/b3/b5/b8/b13/	y1/y2/y3/y4/y5/y6/y7/y8/y9/y10/y11/	1864.63	1767.83	13213	3	3632.47	1	0	0
3	8456	SunS_13_OVCAR3_HILIC_IntactGlycopeptide_F3.8456.8456.4.0.dta	3632.48	4	38.08	VYCNLSAAHTFEDLK	N2H9F0S0	9-2-0-0-0	0	0	4	1	1	1	1	16	b2/b3/b4/b5/b10/	y1/y2/y3/y4/y5/y6/y7/y8/y9/y10/y11/	1864.63	1767.85	#N/A	4	3632.47	1	0	0
3	8463	SunS_13_OVCAR3_HILIC_IntactGlycopeptide_F3.8463.8463.3.0.dta	3470.42	3	38.1	VYCNLSAAHTFEDLK	N2H8F0S0	8-2-0-0-0	-2	0	4	1	1	1	1	18	b2/b3/b5/b6/b9/b13/	y1/y2/y3/y4/y5/y6/y7/y8/y9/y10/y11/y12/	1702.58	1767.84	#N/A	3	3470.41	1	0	0
3	8517	SunS_13_OVCAR3_HILIC_IntactGlycopeptide_F3.8517.8517.3.0.dta	3632.46	3	38.25	VYCNLSAAHTFEDLK	N2H9F0S0	9-2-0-0-0	-2	0	4	1	1	1	1	14	b3/b4/b5/b8/	y1/y2/y3/y4/y6/y7/y8/y9/y10/y11/	1864.63	1767.83	#N/A	3	3632.47	1	0	0
3	8889	SunS_13_OVCAR3_HILIC_IntactGlycopeptide_F3.8889.8889.4.0.dta	3722.5	4	39.36	CNMINGTDGDSFHPLITK	N2H8F0S0	8-2-0-0-0	-1	0	3	1	1	0	1	14	b2/b3/b4/b8/	y1/y2/y3/y5/y6/y8/y10/y11/y13/y14/	1702.58	2019.92	#N/A	4	3722.5	1	0	0
3	8890	SunS_13_OVCAR3_HILIC_IntactGlycopeptide_F3.8890.8890.3.0.dta	3722.5	3	39.37	CNMINGTDGDSFHPLITK	N2H8F0S0	8-2-0-0-0	0	0	4	1	1	1	1	23	b2/b3/b4/b5/b6/b7/b8/b13/	y1/y2/y3/y4/y5/y6/y7/y8/y9/y10/y11/y12/y13/y14/y15/	1702.58	2019.92	#N/A	3	3722.5	1	0	0
3	8927	SunS_13_OVCAR3_HILIC_IntactGlycopeptide_F3.8927.8927.3.0.dta	4139.71	3	39.46	HLYTTTGGETDFTNVTSLR	N2H10F0S0	10-2-0-0-0	-2	0	4	1	1	1	1	28	b1/b2/b3/b4/b5/b6/b7/b8/b9/b10/b11/b12/b13/b15/	y1/y2/y3/y4/y5/y6/y7/y8/y10/y12/y13/y14/y16/y17/	2026.69	2113.02	2218	3	4139.7	1	1	1
3	8928	SunS_13_OVCAR3_HILIC_IntactGlycopeptide_F3.8928.8928.4.0.dta	4139.71	4	39.46	HLYTTTGGETDFTNVTSLR	N2H10F0S0	10-2-0-0-0	-2	0	4	1	1	1	1	29	b1/b2/b3/b4/b5/b6/b7/b8/b9/b10/b11/b12/b13/b14/	y1/y2/y3/y4/y5/y6/y7/y8/y9/y10/y12/y13/y14/y16/y17/	2026.69	2113.03	1924	4	4139.7	1	1	1
3	8948	SunS_13_OVCAR3_HILIC_IntactGlycopeptide_F3.8948.8948.3.0.dta	3977.63	3	39.51	HLYTTTGGETDFTNVTSLR	N2H9F0S0	9-2-0-0-0	-2	0	4	1	1	1	1	31	b1/b2/b3/b4/b5/b6/b7/b8/b9/b10/b11/b12/b13/b14/b15/	y1/y2/y3/y4/y5/y6/y7/y8/y10/y11/y12/y13/y14/y16/y17/y18/	1864.63	2113	1842	3	3977.65	1	1	1
3	8949	SunS_13_OVCAR3_HILIC_IntactGlycopeptide_F3.8949.8949.4.0.dta	3977.65	4	39.52	HLYTTTGGETDFTNVTSLR	N2H9F0S0	9-2-0-0-0	-2	0	4	1	1	1	1	30	b1/b2/b3/b4/b5/b6/b7/b8/b9/b10/b11/b12/b13/b15/	y1/y2/y3/y4/y5/y6/y7/y8/y9/y10/y12/y13/y14/y15/y16/y17/	1864.63	2113.02	1799	4	3977.65	1	1	1
3	9021	SunS_13_OVCAR3_HILIC_IntactGlycopeptide_F3.9021.9021.3.0.dta	4139.69	3	39.72	HLYTTTGGETDFTNVTSLR	N2H10F0S0	10-2-0-0-0	-2	0	2	0	1	0	1	12	b2/b3/b4/b5/b6/b7/b9/b11/	y1/y3/y4/y5/	2026.69	2113	3262	3	4139.7	1	1	1
3	9079	SunS_13_OVCAR3_HILIC_IntactGlycopeptide_F3.9079.9079.3.0.dta	3381.49	3	39.88	NYAIIKPIGFNETAK	N2H8F0S0	8-2-0-0-0	-1	0	4	1	1	1	1	15	b2/b3/b4/b5/b6/b8/	y1/y2/y3/y4/y7/y8/y9/y10/y11/	1702.58	1678.91	1162	3	3381.5	1	1	1
3	9128	SunS_13_OVCAR3_HILIC_IntactGlycopeptide_F3.9128.9128.3.0.dta	3219.45	3	40.02	NYAIIKPIGFNETAK	N2H7F0S0	7-2-0-0-0	0	0	4	1	1	1	1	15	b2/b3/b4/b5/b7/b8/b12/	y1/y2/y3/y4/y7/y9/y10/y11/	1540.53	1678.92	518	3	3219.45	1	1	1
3	9141	SunS_13_OVCAR3_HILIC_IntactGlycopeptide_F3.9141.9141.3.0.dta	3345.32	3	40.06	WNCSTVDNTSVFGR	N2H8F0S0	8-2-0-0-0	-2	0	4	1	1	1	1	16	b1/b2/b3/b13/	y1/y2/y3/y4/y5/y6/y7/y8/y9/y10/y11/y12/	1702.58	1642.74	758	3	3345.31	1	1	1
3	9224	SunS_13_OVCAR3_HILIC_IntactGlycopeptide_F3.9224.9224.3.0.dta	3631.56	3	40.37	SSCGKENTSDPSLVIAFGR	N4H4F1S0	4-4-0-1-0	0	0	2	0	1	0	1	11	b6/b10/	y2/y3/y4/y5/y6/y7/y9/y11/y12/	1606.59	2024.97	2266	3	3631.56	1	1	1
3	9231	SunS_13_OVCAR3_HILIC_IntactGlycopeptide_F3.9231.9231.4.0.dta	3428.48	4	40.39	SSCGKENTSDPSLVIAFGR	N3H4F1S0	4-3-0-1-0	-1	0	2	0	1	0	1	14	b5/b6/b10/	y1/y2/y3/y4/y5/y6/y7/y9/y10/y11/y12/	1403.51	2024.97	1464	4	3428.48	1	1	1
3	9297	SunS_13_OVCAR3_HILIC_IntactGlycopeptide_F3.9297.9297.3.0.dta	3428.48	3	40.59	SSCGKENTSDPSLVIAFGR	N3H4F1S0	4-3-0-1-0	-2	0	3	0	1	1	1	11	b5/b10/	y1/y2/y3/y4/y5/y6/y9/y11/y12/	1403.51	2024.97	2576	3	3428.48	1	1	1
3	9354	SunS_13_OVCAR3_HILIC_IntactGlycopeptide_F3.9354.9354.3.0.dta	3063.33	3	40.78	SSCGKENTSDPSLVIAFGR	N2H3F1S0	3-2-0-1-0	0	0	2	0	1	0	1	21	b3/b4/b5/b6/b7/b8/b10/	y1/y2/y3/y4/y5/y6/y7/y8/y9/y10/y11/y12/y13/y14/	1038.38	2024.96	755	3	3063.34	1	1	1
3	9388	SunS_13_OVCAR3_HILIC_IntactGlycopeptide_F3.9388.9388.3.0.dta	2977.26	3	40.87	EVIDTNLTTLR	N2H8F0S0	8-2-0-0-0	-1	0	3	1	0	1	1	12	b2/b3/b5/b7/	y1/y2/y3/y4/y5/y7/y8/y9/	1702.58	1274.68	1185	3	2977.27	1	1	1
3	9462	SunS_13_OVCAR3_HILIC_IntactGlycopeptide_F3.9462.9462.3.0.dta	2493.02	3	41.21	NGSLFAFR	N3H6F0S0	6-3-0-0-0	0	0	2	1	0	1	0	7		y1/y2/y3/y4/y5/y6/y7/	1581.56	911.466	1761	3	2493.02	1	1	1
3	9490	SunS_13_OVCAR3_HILIC_IntactGlycopeptide_F3.9490.9490.3.0.dta	2289.94	3	41.31	NGSLFAFR	N2H6F0S0	6-2-0-0-0	0	0	3	1	1	1	0	9	b2/b3/	y1/y2/y3/y4/y5/y6/y7/	1378.48	911.463	672	3	2289.94	1	1	1
3	9608	SunS_13_OVCAR3_HILIC_IntactGlycopeptide_F3.9608.9608.3.0.dta	3352.31	3	41.68	NSSLCALCIGSEK	N4H5F0S1	5-4-1-0-0	-1	0	2	1	0	1	0	7	b2/b4/	y4/y5/y6/y7/y9/	1913.68	1438.64	2028	3	3352.33	1	1	1
3	9618	SunS_13_OVCAR3_HILIC_IntactGlycopeptide_F3.9618.9618.3.0.dta	3961.69	3	41.7	TTLVDNNTWNNSHIALVGK	N2H9F0S0	9-2-0-0-0	-2	0	4	1	1	1	1	7	b2/b3/	y2/y3/y4/y5/y6/	1864.63	2097.06	3527	3	3961.68	1	1	1
3	9699	SunS_13_OVCAR3_HILIC_IntactGlycopeptide_F3.9699.9699.4.0.dta	4186.73	4	41.96	DLNEDDHHHECLNVTQLLK	N3H5F1S1	5-3-1-1-0	-1	0	2	0	1	0	1	8	b4/b7/b8/b9/	y1/y2/y4/y5/	1856.66	2330.07	#N/A	4	4186.74	1	1	1
3	9704	SunS_13_OVCAR3_HILIC_IntactGlycopeptide_F3.9704.9704.5.0.dta	4186.74	5	41.98	DLNEDDHHHECLNVTQLLK	N3H5F1S1	5-3-1-1-0	-1	0	2	0	1	0	1	8	b2/b4/b6/b7/	y1/y2/y3/y5/	1856.66	2330.08	#N/A	5	4186.74	1	1	1
3	9874	SunS_13_OVCAR3_HILIC_IntactGlycopeptide_F3.9874.9874.4.0.dta	4413.79	4	42.6	HNNDTQHIWESDSNEFSVIADPR	N2H8F0S0	8-2-0-0-0	-1	0	1	0	0	0	1	8	b2/b3/	y1/y2/y4/y5/y6/y7/	1702.58	2711.21	1822	4	4413.78	1	1	1
3	9889	SunS_13_OVCAR3_HILIC_IntactGlycopeptide_F3.9889.9889.5.0.dta	4575.84	5	42.64	HNNDTQHIWESDSNEFSVIADPR	N2H9F0S0	9-2-0-0-0	-1	0	1	0	0	0	1	17	b1/b2/b3/	y1/y2/y3/y4/y5/y6/y7/y8/y9/y11/y12/y13/y14/y15/	1864.63	2711.2	#N/A	5	4575.83	1	1	1
3	9903	SunS_13_OVCAR3_HILIC_IntactGlycopeptide_F3.9903.9903.5.0.dta	4413.76	5	42.68	HNNDTQHIWESDSNEFSVIADPR	N2H8F0S0	8-2-0-0-0	-3	0	1	0	0	0	1	13	b2/b3/b4/b8/	y1/y2/y3/y4/y5/y6/y7/y8/y12/	1702.58	2711.18	#N/A	5	4413.78	1	1	1
3	9906	SunS_13_OVCAR3_HILIC_IntactGlycopeptide_F3.9906.9906.3.0.dta	4575.84	3	42.69	HNNDTQHIWESDSNEFSVIADPR	N2H9F0S0	9-2-0-0-0	-2	0	2	0	1	0	1	26	b2/b3/b4/b5/b7/b8/b9/b10/b21/	y1/y2/y3/y4/y5/y6/y7/y8/y9/y10/y11/y12/y13/y14/y15/y16/y19/	1864.63	2711.2	#N/A	3	4575.83	1	1	1
3	9943	SunS_13_OVCAR3_HILIC_IntactGlycopeptide_F3.9943.9943.4.0.dta	4089.68	4	42.78	HNNDTQHIWESDSNEFSVIADPR	N2H6F0S0	6-2-0-0-0	-1	0	1	0	0	0	1	8	b3/	y1/y2/y4/y5/y6/y7/y8/	1378.48	2711.21	2511	4	4089.68	1	1	1
3	9947	SunS_13_OVCAR3_HILIC_IntactGlycopeptide_F3.9947.9947.4.0.dta	4251.72	4	42.8	HNNDTQHIWESDSNEFSVIADPR	N2H7F0S0	7-2-0-0-0	-3	0	1	0	0	0	1	12	b1/b3/	y1/y2/y4/y5/y6/y7/y8/y11/y12/y13/	1540.53	2711.19	1664	4	4251.73	1	1	1
3	9967	SunS_13_OVCAR3_HILIC_IntactGlycopeptide_F3.9967.9967.4.0.dta	4575.81	4	42.85	HNNDTQHIWESDSNEFSVIADPR	N2H9F0S0	9-2-0-0-0	-2	0	2	0	1	0	1	26	b2/b3/b4/b5/b6/b7/b8/b9/b10/b21/	y1/y2/y3/y4/y5/y6/y7/y8/y9/y10/y11/y12/y13/y14/y15/y16/	1864.63	2711.18	#N/A	4	4575.83	1	1	1
3	9972	SunS_13_OVCAR3_HILIC_IntactGlycopeptide_F3.9972.9972.3.0.dta	2797.14	3	42.86	DIYTFDGALNK	N2H7F0S0	7-2-0-0-0	0	0	2	1	0	1	0	8	b2/b4/b8/	y2/y5/y6/y7/y8/	1540.53	1256.61	2995	3	2797.14	1	1	1
3	9974	SunS_13_OVCAR3_HILIC_IntactGlycopeptide_F3.9974.9974.4.0.dta	4413.79	4	42.86	HNNDTQHIWESDSNEFSVIADPR	N2H8F0S0	8-2-0-0-0	-2	0	2	0	1	0	1	25	b2/b3/b4/b6/b7/b8/b9/b10/b21/	y1/y2/y3/y4/y5/y6/y7/y8/y9/y10/y11/y12/y13/y14/y15/y16/	1702.58	2711.21	#N/A	4	4413.79	1	1	1
3	9995	SunS_13_OVCAR3_HILIC_IntactGlycopeptide_F3.9995.9995.5.0.dta	4575.83	5	42.92	HNNDTQHIWESDSNEFSVIADPR	N2H9F0S0	9-2-0-0-0	-3	0	2	0	1	0	1	19	b2/b3/b5/b6/b8/	y1/y2/y3/y4/y5/y6/y7/y8/y9/y11/y12/y13/y14/y15/	1864.63	2711.2	#N/A	5	4575.83	1	1	1
3	10002	SunS_13_OVCAR3_HILIC_IntactGlycopeptide_F3.10002.10002.3.0.dta	4413.78	3	42.94	HNNDTQHIWESDSNEFSVIADPR	N2H8F0S0	8-2-0-0-0	-2	0	2	0	1	0	1	27	b2/b3/b4/b6/b7/b8/b9/b10/b21/	y1/y2/y3/y4/y5/y6/y7/y8/y9/y10/y11/y12/y13/y14/y15/y16/y17/y19/	1702.58	2711.2	#N/A	3	4413.77	1	1	1
3	10003	SunS_13_OVCAR3_HILIC_IntactGlycopeptide_F3.10003.10003.5.0.dta	4413.76	5	42.94	HNNDTQHIWESDSNEFSVIADPR	N2H8F0S0	8-2-0-0-0	-2	0	2	0	1	0	1	23	b2/b3/b6/b7/b8/b9/b21/	y1/y2/y3/y4/y5/y6/y7/y8/y9/y10/y11/y12/y13/y14/y15/y16/	1702.58	2711.18	#N/A	5	4413.78	1	1	1
3	10004	SunS_13_OVCAR3_HILIC_IntactGlycopeptide_F3.10004.10004.3.0.dta	4251.7	3	42.94	HNNDTQHIWESDSNEFSVIADPR	N2H7F0S0	7-2-0-0-0	-2	0	2	0	1	0	1	26	b2/b3/b4/b6/b7/b8/b9/b10/b21/	y1/y2/y3/y4/y5/y6/y7/y8/y9/y10/y11/y12/y13/y14/y15/y16/y17/	1540.53	2711.18	#N/A	3	4251.72	1	1	1
3	10016	SunS_13_OVCAR3_HILIC_IntactGlycopeptide_F3.10016.10016.4.0.dta	4430.79	4	42.97	GYYNQSEAGSHTLQSMYGCDVGPDGR	N3H6F0S0	6-3-0-0-0	-1	0	1	0	1	0	0	9	b7/b8/b10/b12/b16/	y1/y9/y10/y12/	1581.56	2849.23	#N/A	4	4430.8	1	0	0
3	10017	SunS_13_OVCAR3_HILIC_IntactGlycopeptide_F3.10017.10017.3.0.dta	4575.83	3	42.98	HNNDTQHIWESDSNEFSVIADPR	N2H9F0S0	9-2-0-0-0	-2	0	2	0	1	0	1	9	b2/b3/	y1/y2/y5/y11/y12/y13/y15/	1864.63	2711.19	#N/A	3	4575.83	1	1	1
3	10021	SunS_13_OVCAR3_HILIC_IntactGlycopeptide_F3.10021.10021.3.0.dta	4089.66	3	42.99	HNNDTQHIWESDSNEFSVIADPR	N2H6F0S0	6-2-0-0-0	-1	0	2	0	1	0	1	25	b2/b3/b4/b5/b6/b7/b8/b9/b21/	y1/y2/y3/y4/y5/y6/y7/y8/y9/y10/y11/y12/y13/y14/y15/y16/	1378.48	2711.18	#N/A	3	4089.67	1	1	1
3	10049	SunS_13_OVCAR3_HILIC_IntactGlycopeptide_F3.10049.10049.4.0.dta	4089.67	4	43.06	HNNDTQHIWESDSNEFSVIADPR	N2H6F0S0	6-2-0-0-0	-2	0	2	0	1	0	1	27	b2/b3/b4/b5/b6/b7/b8/b9/b10/b15/b21/	y1/y2/y3/y4/y5/y6/y7/y8/y9/y10/y11/y12/y13/y14/y15/y16/	1378.48	2711.19	#N/A	4	4089.68	1	1	1
3	10050	SunS_13_OVCAR3_HILIC_IntactGlycopeptide_F3.10050.10050.4.0.dta	4251.71	4	43.06	HNNDTQHIWESDSNEFSVIADPR	N2H7F0S0	7-2-0-0-0	-2	0	2	0	1	0	1	27	b2/b3/b4/b5/b6/b7/b8/b9/b10/b21/	y1/y2/y3/y4/y5/y6/y7/y8/y9/y10/y11/y12/y13/y14/y15/y16/y17/	1540.53	2711.18	#N/A	4	4251.73	1	1	1
3	10053	SunS_13_OVCAR3_HILIC_IntactGlycopeptide_F3.10053.10053.3.0.dta	4280.73	3	43.07	MYSEGSDIVPQSNETALHYFK	N2H9F0S0	9-2-0-0-0	-2	0	3	0	1	1	1	18	b2/b3/b4/b5/b7/b8/b9/b12/	y1/y2/y3/y4/y5/y6/y7/y10/y12/y13/	1864.63	2416.09	#N/A	3	4280.72	1	0	0
3	10065	SunS_13_OVCAR3_HILIC_IntactGlycopeptide_F3.10065.10065.4.0.dta	4358.84	4	43.1	HNNDTQHIWESDSNEFSVIADPR	N5H3F1S0	3-5-0-1-0	-1	0	1	0	0	0	1	9	b3/	y1/y2/y4/y5/y7/y11/y13/y15/	1647.61	2711.23	3118	4	4358.77	1	1	1
3	10068	SunS_13_OVCAR3_HILIC_IntactGlycopeptide_F3.10068.10068.4.0.dta	4575.83	4	43.11	HNNDTQHIWESDSNEFSVIADPR	N2H9F0S0	9-2-0-0-0	0	0	2	0	1	0	1	16	b2/b3/b5/b8/	y1/y2/y3/y4/y5/y6/y7/y8/y11/y12/y13/y15/	1864.63	2711.19	1415	4	4575.82	1	1	1
3	10069	SunS_13_OVCAR3_HILIC_IntactGlycopeptide_F3.10069.10069.5.0.dta	4251.73	5	43.11	HNNDTQHIWESDSNEFSVIADPR	N2H7F0S0	7-2-0-0-0	-2	0	1	0	0	0	1	11	b2/b3/	y1/y2/y3/y4/y5/y6/y7/y8/y15/	1540.53	2711.2	#N/A	5	4251.73	1	1	1
3	10086	SunS_13_OVCAR3_HILIC_IntactGlycopeptide_F3.10086.10086.4.0.dta	4413.76	4	43.15	HNNDTQHIWESDSNEFSVIADPR	N2H8F0S0	8-2-0-0-0	-3	0	2	0	1	0	1	24	b2/b3/b4/b5/b6/b7/b8/b9/b21/	y1/y2/y3/y4/y5/y6/y7/y8/y9/y10/y11/y12/y13/y14/y15/	1702.58	2711.18	#N/A	4	4413.78	1	1	1
3	10090	SunS_13_OVCAR3_HILIC_IntactGlycopeptide_F3.10090.10090.3.0.dta	4118.68	3	43.16	MYSEGSDIVPQSNETALHYFK	N2H8F0S0	8-2-0-0-0	-3	0	2	0	1	0	1	12	b2/b7/b8/b9/b15/	y2/y3/y4/y5/y10/y12/y13/	1702.58	2416.1	#N/A	3	4119.68	0	1	0
3	10091	SunS_13_OVCAR3_HILIC_IntactGlycopeptide_F3.10091.10091.4.0.dta	4155.72	4	43.16	HNNDTQHIWESDSNEFSVIADPR	N4H3F1S0	3-4-0-1-0	-2	0	1	0	0	0	1	9	b3/b10/	y1/y2/y5/y6/y7/y8/y15/	1444.53	2711.19	2591	4	4155.74	1	1	1
3	10098	SunS_13_OVCAR3_HILIC_IntactGlycopeptide_F3.10098.10098.3.0.dta	3956.62	3	43.18	MYSEGSDIVPQSNETALHYFK	N2H7F0S0	7-2-0-0-0	-2	0	2	0	1	0	1	14	b2/b3/b7/b8/b9/b15/	y2/y3/y4/y5/y6/y7/y10/y12/	1540.53	2416.09	#N/A	3	3956.63	1	0	0
3	10108	SunS_13_OVCAR3_HILIC_IntactGlycopeptide_F3.10108.10108.4.0.dta	3956.63	4	43.21	MYSEGSDIVPQSNETALHYFK	N2H7F0S0	7-2-0-0-0	-1	0	2	0	1	0	1	14	b2/b3/b7/b8/b9/b15/	y1/y2/y3/y4/y5/y6/y7/y12/	1540.53	2416.1	#N/A	4	3956.63	1	0	0
3	10110	SunS_13_OVCAR3_HILIC_IntactGlycopeptide_F3.10110.10110.5.0.dta	4413.79	5	43.21	HNNDTQHIWESDSNEFSVIADPR	N2H8F0S0	8-2-0-0-0	-2	0	1	0	0	0	1	9	b3/	y1/y2/y4/y5/y6/y7/y8/y9/	1702.58	2711.21	#N/A	5	4413.79	1	1	1
3	10114	SunS_13_OVCAR3_HILIC_IntactGlycopeptide_F3.10114.10114.5.0.dta	4089.68	5	43.23	HNNDTQHIWESDSNEFSVIADPR	N2H6F0S0	6-2-0-0-0	-2	0	1	0	0	0	1	10	b2/b3/	y1/y2/y3/y4/y5/y6/y7/y8/	1378.48	2711.2	#N/A	5	4089.68	1	1	1
3	10118	SunS_13_OVCAR3_HILIC_IntactGlycopeptide_F3.10118.10118.4.0.dta	4192.78	4	43.24	ILLTCSLNDSATEVTGHR	N4H5F2S1	5-4-1-2-0	0	0	3	0	1	1	1	6	b2/	y1/y4/y5/y7/y9/	2205.79	1986.99	4807	4	4192.78	1	1	1
3	10121	SunS_13_OVCAR3_HILIC_IntactGlycopeptide_F3.10121.10121.3.0.dta	4089.67	3	43.25	HNNDTQHIWESDSNEFSVIADPR	N2H6F0S0	6-2-0-0-0	0	0	2	0	1	0	1	18	b2/b3/b6/b7/b8/	y1/y2/y3/y4/y5/y6/y7/y8/y11/y12/y13/y14/y15/	1378.48	2711.19	2593	3	4089.68	1	1	1
3	10138	SunS_13_OVCAR3_HILIC_IntactGlycopeptide_F3.10138.10138.4.0.dta	4089.68	4	43.31	HNNDTQHIWESDSNEFSVIADPR	N2H6F0S0	6-2-0-0-0	-2	0	2	0	1	0	1	22	b2/b3/b5/b6/b7/b8/b9/	y1/y2/y3/y4/y5/y6/y7/y8/y9/y11/y12/y13/y14/y15/y16/	1378.48	2711.2	#N/A	4	4089.69	1	1	1
3	10146	SunS_13_OVCAR3_HILIC_IntactGlycopeptide_F3.10146.10146.4.0.dta	4251.75	4	43.33	HNNDTQHIWESDSNEFSVIADPR	N2H7F0S0	7-2-0-0-0	-2	0	1	0	0	0	1	12	b2/b3/	y1/y2/y3/y4/y5/y6/y7/y8/y11/y15/	1540.53	2711.22	2249	4	4251.74	1	1	1
3	10150	SunS_13_OVCAR3_HILIC_IntactGlycopeptide_F3.10150.10150.4.0.dta	3794.59	4	43.35	MYSEGSDIVPQSNETALHYFK	N2H6F0S0	6-2-0-0-0	-1	0	2	0	1	0	1	8	b2/b3/b7/b8/b9/	y3/y4/y12/	1378.48	2416.11	5334	4	3794.59	1	0	0
3	10152	SunS_13_OVCAR3_HILIC_IntactGlycopeptide_F3.10152.10152.4.0.dta	4575.84	4	43.36	HNNDTQHIWESDSNEFSVIADPR	N2H9F0S0	9-2-0-0-0	-3	0	1	0	0	0	1	15	b2/b3/	y1/y2/y3/y4/y5/y6/y7/y8/y10/y11/y13/y14/y15/	1864.63	2711.21	1547	4	4575.84	1	1	1
3	10163	SunS_13_OVCAR3_HILIC_IntactGlycopeptide_F3.10163.10163.4.0.dta	4413.8	4	43.41	HNNDTQHIWESDSNEFSVIADPR	N2H8F0S0	8-2-0-0-0	-2	0	2	0	1	0	1	23	b2/b3/b5/b6/b7/b8/b9/b21/	y1/y2/y3/y4/y5/y6/y7/y8/y9/y10/y11/y12/y13/y14/y15/	1702.58	2711.22	#N/A	4	4413.8	1	1	1
3	10207	SunS_13_OVCAR3_HILIC_IntactGlycopeptide_F3.10207.10207.4.0.dta	4089.69	4	43.57	HNNDTQHIWESDSNEFSVIADPR	N2H6F0S0	6-2-0-0-0	0	0	1	0	0	0	1	16	b2/b3/b8/	y1/y2/y3/y4/y5/y6/y7/y8/y11/y12/y13/y14/y15/	1378.48	2711.22	1584	4	4089.69	1	1	1
3	10268	SunS_13_OVCAR3_HILIC_IntactGlycopeptide_F3.10268.10268.4.0.dta	4089.69	4	43.83	HNNDTQHIWESDSNEFSVIADPR	N2H6F0S0	6-2-0-0-0	-2	0	1	0	0	0	1	14	b2/b3/b4/	y1/y2/y3/y4/y5/y6/y7/y8/y11/y12/y13/	1378.48	2711.22	1065	4	4089.68	1	1	1
3	10291	SunS_13_OVCAR3_HILIC_IntactGlycopeptide_F3.10291.10291.4.0.dta	4413.79	4	43.92	HNNDTQHIWESDSNEFSVIADPR	N2H8F0S0	8-2-0-0-0	-2	0	2	0	1	0	1	15	b2/b3/	y1/y2/y3/y4/y5/y6/y7/y8/y9/y11/y12/y13/y15/	1702.58	2711.21	1290	4	4413.79	1	1	1
3	10328	SunS_13_OVCAR3_HILIC_IntactGlycopeptide_F3.10328.10328.4.0.dta	4089.68	4	44.09	HNNDTQHIWESDSNEFSVIADPR	N2H6F0S0	6-2-0-0-0	-2	0	1	0	0	0	1	8	b3/	y1/y2/y4/y5/y6/y7/y8/	1378.48	2711.2	1486	4	4089.69	1	1	1
3	10401	SunS_13_OVCAR3_HILIC_IntactGlycopeptide_F3.10401.10401.4.0.dta	4089.67	4	44.35	HNNDTQHIWESDSNEFSVIADPR	N2H6F0S0	6-2-0-0-0	0	0	2	0	1	0	1	9	b2/b3/	y1/y2/y4/y5/y6/y7/y8/	1378.48	2711.2	1692	4	4089.69	1	1	1
3	10426	SunS_13_OVCAR3_HILIC_IntactGlycopeptide_F3.10426.10426.4.0.dta	4413.8	4	44.45	HNNDTQHIWESDSNEFSVIADPR	N2H8F0S0	8-2-0-0-0	-2	0	1	0	0	0	1	13	b2/b3/	y1/y2/y3/y4/y5/y6/y7/y8/y11/y13/y15/	1702.58	2711.22	#N/A	2	2207.4	0	1	0
3	10491	SunS_13_OVCAR3_HILIC_IntactGlycopeptide_F3.10491.10491.4.0.dta	4413.79	4	44.71	HNNDTQHIWESDSNEFSVIADPR	N2H8F0S0	8-2-0-0-0	-2	0	1	0	0	0	1	11	b3/	y1/y2/y3/y4/y5/y6/y7/y8/y13/y14/	1702.58	2711.21	1652	4	4413.78	1	1	1
3	10542	SunS_13_OVCAR3_HILIC_IntactGlycopeptide_F3.10542.10542.4.0.dta	4089.69	4	44.86	HNNDTQHIWESDSNEFSVIADPR	N2H6F0S0	6-2-0-0-0	-2	0	1	0	0	0	1	7	b3/	y1/y2/y5/y6/y7/y8/	1378.48	2711.21	2201	4	4089.67	1	1	1
3	10565	SunS_13_OVCAR3_HILIC_IntactGlycopeptide_F3.10565.10565.4.0.dta	4413.77	4	44.96	HNNDTQHIWESDSNEFSVIADPR	N2H8F0S0	8-2-0-0-0	-2	0	1	0	0	0	1	11	b3/	y1/y2/y3/y4/y5/y6/y7/y8/y11/y15/	1702.58	2711.18	1561	4	4413.79	1	1	1
3	10627	SunS_13_OVCAR3_HILIC_IntactGlycopeptide_F3.10627.10627.4.0.dta	4413.77	4	45.22	HNNDTQHIWESDSNEFSVIADPR	N2H8F0S0	8-2-0-0-0	-2	0	1	0	0	0	1	13	b3/	y1/y2/y3/y4/y5/y6/y7/y8/y9/y11/y13/y15/	1702.58	2711.19	1383	4	4413.78	1	1	1
3	10628	SunS_13_OVCAR3_HILIC_IntactGlycopeptide_F3.10628.10628.4.0.dta	4089.66	4	45.22	HNNDTQHIWESDSNEFSVIADPR	N2H6F0S0	6-2-0-0-0	-1	0	1	0	0	0	1	7	b3/	y1/y2/y4/y5/y7/y9/	1378.48	2711.19	2653	4	4089.67	1	1	1
3	10642	SunS_13_OVCAR3_HILIC_IntactGlycopeptide_F3.10642.10642.3.0.dta	3695.54	3	45.27	TVIRPFYLTNSSGVD	N2H10F0S0	10-2-0-0-0	-1	0	3	1	0	1	1	11	b2/b4/b6/b7/b8/b9/b10/b13/b14/	y2/y4/	2026.69	1668.86	1103	3	3695.54	1	1	1
3	10671	SunS_13_OVCAR3_HILIC_IntactGlycopeptide_F3.10671.10671.3.0.dta	3533.49	3	45.39	TVIRPFYLTNSSGVD	N2H9F0S0	9-2-0-0-0	-1	0	2	1	0	1	0	8	b2/b4/b6/b7/b8/b9/	y2/y8/	1864.63	1668.86	2471	3	3533.49	1	1	1
3	10694	SunS_13_OVCAR3_HILIC_IntactGlycopeptide_F3.10694.10694.4.0.dta	4413.79	4	45.48	HNNDTQHIWESDSNEFSVIADPR	N2H8F0S0	8-2-0-0-0	-1	0	2	0	1	0	1	11	b3/	y1/y2/y3/y4/y5/y6/y7/y8/y11/y13/	1702.58	2711.2	949	4	4413.79	1	1	1
3	10731	SunS_13_OVCAR3_HILIC_IntactGlycopeptide_F3.10731.10731.4.0.dta	4356.93	4	45.62	AAVHQINFTVGQTSEWIHGIQR	N2H9F0S0	9-2-0-0-0	-2	0	2	0	1	0	1	17	b4/b5/b6/b7/b12/	y1/y2/y4/y5/y6/y7/y8/y9/y10/y11/y12/y14/	1864.63	2492.29	2219	4	4356.92	1	1	1
3	10739	SunS_13_OVCAR3_HILIC_IntactGlycopeptide_F3.10739.10739.3.0.dta	3533.49	3	45.66	TVIRPFYLTNSSGVD	N2H9F0S0	9-2-0-0-0	-1	0	2	1	0	1	0	6	b2/b4/b6/b7/b8/b9/		1864.63	1668.86	2173	3	3533.5	1	1	1
3	10745	SunS_13_OVCAR3_HILIC_IntactGlycopeptide_F3.10745.10745.4.0.dta	4194.87	4	45.68	AAVHQINFTVGQTSEWIHGIQR	N2H8F0S0	8-2-0-0-0	-2	0	2	0	1	0	1	21	b4/b5/b6/b7/b8/b9/b10/	y1/y2/y3/y4/y5/y6/y7/y8/y9/y10/y12/y13/y14/y15/	1702.58	2492.29	2168	4	4194.87	1	1	1
3	10758	SunS_13_OVCAR3_HILIC_IntactGlycopeptide_F3.10758.10758.4.0.dta	4413.77	4	45.74	HNNDTQHIWESDSNEFSVIADPR	N2H8F0S0	8-2-0-0-0	0	0	1	0	0	0	1	10	b3/	y1/y2/y4/y5/y6/y7/y8/y11/y14/	1702.58	2711.19	1406	4	4413.79	1	1	1
3	10784	SunS_13_OVCAR3_HILIC_IntactGlycopeptide_F3.10784.10784.4.0.dta	4032.8	4	45.85	AAVHQINFTVGQTSEWIHGIQR	N2H7F0S0	7-2-0-0-0	-2	0	2	0	1	0	1	7	b4/b5/b8/	y4/y5/y9/y12/	1540.53	2492.27	#N/A	2	2016.91	0	1	0
3	10817	SunS_13_OVCAR3_HILIC_IntactGlycopeptide_F3.10817.10817.4.0.dta	4413.77	4	46	HNNDTQHIWESDSNEFSVIADPR	N2H8F0S0	8-2-0-0-0	0	0	1	0	0	0	1	8	b3/	y1/y2/y4/y5/y6/y7/y8/	1702.58	2711.19	2035	4	4413.79	1	1	1
3	10876	SunS_13_OVCAR3_HILIC_IntactGlycopeptide_F3.10876.10876.4.0.dta	4413.78	4	46.25	HNNDTQHIWESDSNEFSVIADPR	N2H8F0S0	8-2-0-0-0	-2	0	1	0	0	0	1	10	b3/	y1/y2/y4/y5/y6/y7/y11/y12/y13/	1702.58	2711.2	2069	4	4413.79	1	1	1
3	11070	SunS_13_OVCAR3_HILIC_IntactGlycopeptide_F3.11070.11070.4.0.dta	4413.78	4	46.86	HNNDTQHIWESDSNEFSVIADPR	N2H8F0S0	8-2-0-0-0	-2	0	1	0	0	0	1	9	b3/	y1/y2/y4/y5/y6/y7/y8/y13/	1702.58	2711.2	1549	4	4413.8	1	1	1
3	11092	SunS_13_OVCAR3_HILIC_IntactGlycopeptide_F3.11092.11092.3.0.dta	3245.39	3	46.96	IFIFNQTGIEAK	N2H9F0S0	9-2-0-0-0	0	0	3	1	0	1	1	12	b2/b3/b6/	y1/y2/y3/y5/y6/y7/y8/y9/y10/	1864.63	1380.76	1167	3	3245.39	1	1	1
3	11117	SunS_13_OVCAR3_HILIC_IntactGlycopeptide_F3.11117.11117.3.0.dta	3083.33	3	47.07	IFIFNQTGIEAK	N2H8F0S0	8-2-0-0-0	-1	0	3	1	0	1	1	10	b2/b3/	y2/y3/y5/y6/y7/y8/y9/y10/	1702.58	1380.75	744	3	3083.34	1	1	1
3	11147	SunS_13_OVCAR3_HILIC_IntactGlycopeptide_F3.11147.11147.4.0.dta	4413.77	4	47.18	HNNDTQHIWESDSNEFSVIADPR	N2H8F0S0	8-2-0-0-0	-2	0	1	0	0	0	1	9	b3/b9/	y1/y2/y4/y5/y6/y7/y8/	1702.58	2711.19	1735	4	4413.79	1	1	1
3	11463	SunS_13_OVCAR3_HILIC_IntactGlycopeptide_F3.11463.11463.3.0.dta	3566.55	3	48.68	FEAEHISNYTALLLSR	N2H8F0S0	8-2-0-0-0	-1	0	4	1	1	1	1	15	b2/b3/b5/b6/b7/b9/	y1/y2/y3/y4/y5/y6/y7/y8/y10/	1702.58	1863.97	1487	3	3566.54	1	1	1
3	11489	SunS_13_OVCAR3_HILIC_IntactGlycopeptide_F3.11489.11489.3.0.dta	3404.49	3	48.81	FEAEHISNYTALLLSR	N2H7F0S0	7-2-0-0-0	0	0	4	1	1	1	1	8	b5/b6/	y1/y2/y3/y4/y6/y10/	1540.53	1863.96	3361	3	3404.5	1	1	1
3	11513	SunS_13_OVCAR3_HILIC_IntactGlycopeptide_F3.11513.11513.3.0.dta	3366.38	3	48.93	ELGVVMYNCSCLAR	N3H4F1S1	4-3-1-1-0	0	0	2	1	0	1	0	6	b3/b4/	y1/y2/y5/y6/	1694.6	1671.78	#N/A	3	3366.37	1	0	0
3	11521	SunS_13_OVCAR3_HILIC_IntactGlycopeptide_F3.11521.11521.4.0.dta	4424.93	4	48.97	KIESINQQLLPLGNISDNMDR	N2H10F0S0	10-2-0-0-0	-2	0	2	0	1	0	1	17	b1/b3/b4/b5/b6/b7/b8/b9/b10/b12/	y1/y4/y5/y6/y7/y10/y11/	2026.69	2398.24	10258	4	4424.94	1	0	0
3	11528	SunS_13_OVCAR3_HILIC_IntactGlycopeptide_F3.11528.11528.3.0.dta	4424.94	3	49	KIESINQQLLPLGNISDNMDR	N2H10F0S0	10-2-0-0-0	0	0	2	0	1	0	1	10	b1/b5/b8/b9/b10/	y1/y4/y6/y7/y11/	2026.69	2398.26	#N/A	3	4424.93	1	0	0
3	11536	SunS_13_OVCAR3_HILIC_IntactGlycopeptide_F3.11536.11536.4.0.dta	4252.78	4	49.03	LNITVDHLEFAEDDLSHYTR	N2H9F0S0	9-2-0-0-0	-1	0	2	0	1	0	1	10	b3/	y1/y3/y4/y5/y6/y7/y9/y10/y12/	1864.63	2388.15	5494	4	4252.78	1	1	1
3	11539	SunS_13_OVCAR3_HILIC_IntactGlycopeptide_F3.11539.11539.4.0.dta	4262.88	4	49.04	KIESINQQLLPLGNISDNMDR	N2H9F0S0	9-2-0-0-0	-1	0	2	0	1	0	1	10	b1/b3/b5/b8/b9/b10/	y1/y4/y6/y11/	1864.63	2398.25	#N/A	4	4262.88	1	0	0
3	11545	SunS_13_OVCAR3_HILIC_IntactGlycopeptide_F3.11545.11545.3.0.dta	4262.85	3	49.08	KIESINQQLLPLGNISDNMDR	N2H9F0S0	9-2-0-0-0	-2	0	2	0	1	0	1	13	b1/b5/b6/b7/b8/b9/b10/	y1/y4/y5/y6/y7/y11/	1864.63	2398.22	#N/A	3	4262.87	1	0	0
3	11561	SunS_13_OVCAR3_HILIC_IntactGlycopeptide_F3.11561.11561.4.0.dta	4100.83	4	49.16	KIESINQQLLPLGNISDNMDR	N2H8F0S0	8-2-0-0-0	0	0	2	0	1	0	1	15	b1/b2/b3/b5/b6/b7/b8/b9/b10/	y1/y4/y5/y6/y7/y11/	1702.58	2398.25	9156	4	4100.82	1	0	0
3	11571	SunS_13_OVCAR3_HILIC_IntactGlycopeptide_F3.11571.11571.3.0.dta	4100.83	3	49.22	KIESINQQLLPLGNISDNMDR	N2H8F0S0	8-2-0-0-0	-2	0	3	0	1	1	1	19	b1/b3/b4/b5/b6/b7/b8/b9/b10/b12/	y1/y2/y3/y4/y5/y6/y7/y9/y11/	1702.58	2398.25	#N/A	3	4100.82	1	0	0
3	11590	SunS_13_OVCAR3_HILIC_IntactGlycopeptide_F3.11590.11590.3.0.dta	3220.3	3	49.29	ELGVVMYNCSCLAR	N3H4F0S1	4-3-1-0-0	0	0	2	1	0	1	0	7	b3/b4/	y1/y2/y5/y6/y9/	1548.54	1671.76	#N/A	3	3220.31	1	0	0
3	11603	SunS_13_OVCAR3_HILIC_IntactGlycopeptide_F3.11603.11603.4.0.dta	3938.75	4	49.36	KIESINQQLLPLGNISDNMDR	N2H7F0S0	7-2-0-0-0	-1	0	2	0	1	0	1	15	b1/b3/b5/b6/b7/b8/b9/b10/	y1/y4/y5/y6/y7/y9/y11/	1540.53	2398.23	#N/A	2	1970.39	0	1	0
3	11678	SunS_13_OVCAR3_HILIC_IntactGlycopeptide_F3.11678.11678.4.0.dta	3835.64	4	49.7	TNSTFVQALVEHVK	N5H5F1S1	5-5-1-1-0	-2	0	4	1	1	1	1	10	b7/	y3/y4/y5/y6/y7/y8/y9/y10/y11/	2262.81	1572.83	2257	4	3835.65	1	1	1
3	11682	SunS_13_OVCAR3_HILIC_IntactGlycopeptide_F3.11682.11682.4.0.dta	4223.84	4	49.72	GLVMNYPHITNLTNLGQSTEYR	N2H8F0S0	8-2-0-0-0	-2	0	2	0	1	0	1	15	b2/b3/b6/b9/b10/b12/	y1/y2/y4/y5/y6/y7/y8/y9/y10/	1702.58	2521.26	11004	4	4223.84	1	0	0
3	11683	SunS_13_OVCAR3_HILIC_IntactGlycopeptide_F3.11683.11683.4.0.dta	3778.61	4	49.72	TNSTFVQALVEHVK	N4H5F2S1	5-4-1-2-0	0	0	4	1	1	1	1	10	b1/b2/b7/	y1/y4/y6/y7/y8/y9/y12/	2205.79	1572.81	4242	4	3778.63	1	1	1
3	11696	SunS_13_OVCAR3_HILIC_IntactGlycopeptide_F3.11696.11696.4.0.dta	4061.8	4	49.78	GLVMNYPHITNLTNLGQSTEYR	N2H7F0S0	7-2-0-0-0	-2	0	2	0	1	0	1	19	b2/b3/b6/b9/b10/b12/	y1/y2/y3/y4/y5/y6/y7/y8/y9/y10/y11/y13/y16/	1540.53	2521.27	8736	4	4061.79	1	0	0
3	11697	SunS_13_OVCAR3_HILIC_IntactGlycopeptide_F3.11697.11697.3.0.dta	3778.64	3	49.78	TNSTFVQALVEHVK	N4H5F2S1	5-4-1-2-0	-2	0	3	1	0	1	1	6	b9/	y4/y6/y7/y8/y9/	2205.79	1572.85	#N/A	3	3778.63	1	1	1
3	11699	SunS_13_OVCAR3_HILIC_IntactGlycopeptide_F3.11699.11699.3.0.dta	3835.64	3	49.79	TNSTFVQALVEHVK	N5H5F1S1	5-5-1-1-0	-2	0	4	1	1	1	1	7		y3/y4/y5/y6/y7/y8/y9/	2262.81	1572.83	4017	3	3835.65	1	1	1
3	11706	SunS_13_OVCAR3_HILIC_IntactGlycopeptide_F3.11706.11706.4.0.dta	3632.58	4	49.81	TNSTFVQALVEHVK	N4H5F1S1	5-4-1-1-0	0	0	4	1	1	1	1	9	b7/	y1/y4/y6/y8/y9/y10/y11/y12/	2059.73	1572.85	2805	4	3632.58	1	1	1
3	11711	SunS_13_OVCAR3_HILIC_IntactGlycopeptide_F3.11711.11711.3.0.dta	4061.77	3	49.84	GLVMNYPHITNLTNLGQSTEYR	N2H7F0S0	7-2-0-0-0	-3	0	2	0	1	0	1	15	b2/b3/b6/b9/b10/b12/	y1/y2/y5/y7/y8/y9/y10/y11/y16/	1540.53	2521.24	#N/A	3	4061.79	1	0	0
3	11712	SunS_13_OVCAR3_HILIC_IntactGlycopeptide_F3.11712.11712.3.0.dta	3899.73	3	49.84	GLVMNYPHITNLTNLGQSTEYR	N2H6F0S0	6-2-0-0-0	0	0	2	0	1	0	1	16	b2/b3/b6/b8/b9/b10/b12/	y1/y2/y5/y6/y7/y8/y9/y10/y11/	1378.48	2521.25	3503	3	3899.73	1	0	0
3	11720	SunS_13_OVCAR3_HILIC_IntactGlycopeptide_F3.11720.11720.3.0.dta	3632.58	3	49.87	TNSTFVQALVEHVK	N4H5F1S1	5-4-1-1-0	-2	0	4	1	1	1	1	10	b7/	y3/y4/y5/y6/y7/y8/y9/y10/y12/	2059.73	1572.85	3135	3	3632.58	1	1	1
3	11721	SunS_13_OVCAR3_HILIC_IntactGlycopeptide_F3.11721.11721.4.0.dta	3899.73	4	49.87	GLVMNYPHITNLTNLGQSTEYR	N2H6F0S0	6-2-0-0-0	-2	0	2	0	1	0	1	14	b2/b3/b6/b8/b9/	y1/y2/y4/y5/y6/y7/y8/y9/y10/	1378.48	2521.25	#N/A	2	1950.37	0	1	0
3	11740	SunS_13_OVCAR3_HILIC_IntactGlycopeptide_F3.11740.11740.4.0.dta	3835.66	4	49.96	TNSTFVQALVEHVK	N5H5F1S1	5-5-1-1-0	-1	0	4	1	1	1	1	11	b2/b7/	y3/y4/y5/y6/y7/y8/y9/y10/y12/	2262.81	1572.84	2632	4	3835.66	1	1	1
3	11757	SunS_13_OVCAR3_HILIC_IntactGlycopeptide_F3.11757.11757.4.0.dta	3673.6	4	50.03	TNSTFVQALVEHVK	N5H4F1S1	4-5-1-1-0	0	0	4	1	1	1	1	12	b6/b7/	y3/y4/y5/y6/y7/y8/y9/y10/y11/y12/	2100.76	1572.84	2132	4	3673.6	1	1	1
3	11766	SunS_13_OVCAR3_HILIC_IntactGlycopeptide_F3.11766.11766.4.0.dta	3632.57	4	50.07	TNSTFVQALVEHVK	N4H5F1S1	5-4-1-1-0	-1	0	4	1	1	1	1	13	b9/	y1/y2/y3/y4/y5/y6/y7/y8/y9/y10/y11/y12/	2059.73	1572.83	2802	4	3632.57	1	1	1
3	11773	SunS_13_OVCAR3_HILIC_IntactGlycopeptide_F3.11773.11773.3.0.dta	3673.6	3	50.09	TNSTFVQALVEHVK	N5H4F1S1	4-5-1-1-0	-1	0	4	1	1	1	1	10	b7/b8/	y3/y4/y5/y6/y7/y8/y9/y10/	2100.76	1572.83	1558	3	3673.6	1	1	1
3	11810	SunS_13_OVCAR3_HILIC_IntactGlycopeptide_F3.11810.11810.4.0.dta	3470.5	4	50.23	TNSTFVQALVEHVK	N4H4F1S1	4-4-1-1-0	0	0	4	1	1	1	1	14	b2/b6/b7/	y2/y3/y4/y5/y6/y7/y8/y9/y10/y11/y12/	1897.68	1572.82	1911	4	3470.52	1	1	1
3	11814	SunS_13_OVCAR3_HILIC_IntactGlycopeptide_F3.11814.11814.3.0.dta	3470.52	3	50.24	TNSTFVQALVEHVK	N4H4F1S1	4-4-1-1-0	0	0	4	1	1	1	1	11	b7/	y1/y3/y4/y5/y6/y7/y8/y9/y10/y12/	1897.68	1572.84	1111	3	3470.52	1	1	1
3	11886	SunS_13_OVCAR3_HILIC_IntactGlycopeptide_F3.11886.11886.4.0.dta	3267.43	4	50.52	TNSTFVQALVEHVK	N3H4F1S1	4-3-1-1-0	-2	0	4	1	1	1	1	14	b2/b3/b7/	y1/y3/y4/y5/y6/y7/y8/y9/y10/y11/y12/	1694.6	1572.83	2076	4	3267.45	1	1	1
3	11903	SunS_13_OVCAR3_HILIC_IntactGlycopeptide_F3.11903.11903.4.0.dta	3129.26	4	50.58	DIYTFDGALNK	N3H6F0S1	6-3-1-0-0	-1	0	2	1	0	1	0	12	b2/b3/b4/b8/	y1/y2/y3/y5/y6/y7/y8/y9/	1872.65	1256.61	2826	4	3129.27	1	1	1
3	11938	SunS_13_OVCAR3_HILIC_IntactGlycopeptide_F3.11938.11938.3.0.dta	3129.26	3	50.74	DIYTFDGALNK	N3H6F0S1	6-3-1-0-0	-1	0	2	1	0	1	0	18	b2/b3/b4/b5/b6/b7/b8/b9/b10/	y1/y2/y3/y4/y5/y6/y7/y9/y10/	1872.65	1256.61	2223	3	3129.28	1	1	1
3	11954	SunS_13_OVCAR3_HILIC_IntactGlycopeptide_F3.11954.11954.3.0.dta	3113.29	3	50.82	DIYTFDGALNK	N3H5F1S1	5-3-1-1-0	-1	0	2	1	0	1	0	17	b2/b3/b4/b5/b6/b7/b8/b9/	y1/y2/y3/y4/y5/y6/y7/y9/y10/	1856.66	1256.63	1737	3	3113.28	1	1	1
3	11957	SunS_13_OVCAR3_HILIC_IntactGlycopeptide_F3.11957.11957.4.0.dta	3129.26	4	50.83	DIYTFDGALNK	N3H6F0S1	6-3-1-0-0	-1	0	2	1	0	1	0	12	b2/b3/b4/b8/b9/	y1/y2/y3/y5/y6/y7/y9/	1872.65	1256.61	2557	4	3129.27	1	1	1
3	11974	SunS_13_OVCAR3_HILIC_IntactGlycopeptide_F3.11974.11974.3.0.dta	2967.21	3	50.95	DIYTFDGALNK	N3H5F0S1	5-3-1-0-0	0	0	2	1	0	1	0	9	b2/b3/b4/b8/b9/	y2/y3/y5/y7/	1710.6	1256.61	2977	3	2967.22	1	1	1
3	11975	SunS_13_OVCAR3_HILIC_IntactGlycopeptide_F3.11975.11975.4.0.dta	3364.49	4	50.95	NGSSIVDLSPLIHR	N3H5F1S1	5-3-1-1-0	0	0	4	1	1	1	1	9		y1/y2/y5/y6/y7/y8/y9/y10/y11/	1856.66	1507.83	716	4	3364.48	1	1	1
3	11991	SunS_13_OVCAR3_HILIC_IntactGlycopeptide_F3.11991.11991.3.0.dta	3364.51	3	51.03	NGSSIVDLSPLIHR	N3H5F1S1	5-3-1-1-0	-1	0	4	1	1	1	1	7		y1/y2/y5/y6/y7/y8/y9/	1856.66	1507.85	2550	3	3364.48	1	1	1
3	11996	SunS_13_OVCAR3_HILIC_IntactGlycopeptide_F3.11996.11996.3.0.dta	3200.31	3	51.05	ANNSWFQSILR	N2H9F0S0	9-2-0-0-0	-1	0	4	1	1	1	1	12	b3/b4/b5/	y1/y2/y3/y4/y5/y6/y7/y8/y9/	1864.63	1335.68	277	3	3200.32	1	1	1
3	12022	SunS_13_OVCAR3_HILIC_IntactGlycopeptide_F3.12022.12022.3.0.dta	3038.27	3	51.18	ANNSWFQSILR	N2H8F0S0	8-2-0-0-0	-1	0	4	1	1	1	1	10	b3/b4/	y1/y2/y4/y5/y6/y7/y8/y9/	1702.58	1335.69	139	3	3038.27	1	1	1
3	12026	SunS_13_OVCAR3_HILIC_IntactGlycopeptide_F3.12026.12026.3.0.dta	2967.23	3	51.2	DIYTFDGALNK	N3H5F0S1	5-3-1-0-0	0	0	2	1	0	1	0	14	b2/b3/b4/b5/b7/b8/b9/	y1/y2/y3/y5/y6/y7/y9/	1710.6	1256.63	2122	3	2967.22	1	1	1
3	12035	SunS_13_OVCAR3_HILIC_IntactGlycopeptide_F3.12035.12035.3.0.dta	3129.28	3	51.26	DIYTFDGALNK	N3H6F0S1	6-3-1-0-0	0	0	2	1	0	1	0	8	b2/b3/b7/b8/b9/	y2/y5/y9/	1872.65	1256.63	2866	3	3129.27	1	1	1
3	12046	SunS_13_OVCAR3_HILIC_IntactGlycopeptide_F3.12046.12046.4.0.dta	3947.74	4	51.32	ISFLIGSDSTHVIPGESPFNK	N2H8F0S0	8-2-0-0-0	-2	0	3	1	1	0	1	16	b2/b3/b4/b5/b11/b12/b13/b16/b17/	y2/y4/y5/y8/y9/y11/y16/	1702.58	2245.16	2299	4	3947.74	1	1	1
3	12049	SunS_13_OVCAR3_HILIC_IntactGlycopeptide_F3.12049.12049.3.0.dta	3947.73	3	51.33	ISFLIGSDSTHVIPGESPFNK	N2H8F0S0	8-2-0-0-0	0	0	3	0	1	1	1	16	b2/b3/b4/b5/b8/b11/b12/b13/b16/b17/	y2/y4/y5/y8/y9/y11/	1702.58	2245.15	1930	3	3947.74	1	1	1
3	12261	SunS_13_OVCAR3_HILIC_IntactGlycopeptide_F3.12261.12261.4.0.dta	4232.9	4	52.49	TEVTYLNFSTSYNISITTVSCGK	N5H3F1S0	3-5-0-1-0	-2	0	1	0	0	0	1	7	b3/b7/b13/	y8/y9/y13/y14/	1647.61	2585.28	6086	4	4232.91	1	0	0
3	12263	SunS_13_OVCAR3_HILIC_IntactGlycopeptide_F3.12263.12263.4.0.dta	4438.84	4	52.5	KLCPDCPLLAPLNDSR	N5H6F0S2	6-5-2-0-0	-1	0	4	1	1	1	1	7	b1/b3/b5/b6/b9/b10/	y2/	2569.9	1868.93	4842	4	4438.85	1	1	1
3	12344	SunS_13_OVCAR3_HILIC_IntactGlycopeptide_F3.12344.12344.5.0.dta	4438.83	5	52.87	KLCPDCPLLAPLNDSR	N5H6F0S2	6-5-2-0-0	-2	0	3	0	1	1	1	7	b1/b3/b5/b6/b9/b10/	y2/	2569.9	1868.92	6687	5	4438.85	1	1	1
3	12368	SunS_13_OVCAR3_HILIC_IntactGlycopeptide_F3.12368.12368.4.0.dta	4073.72	4	52.99	KLCPDCPLLAPLNDSR	N4H5F0S2	5-4-2-0-0	-2	0	3	0	1	1	1	7	b3/b5/b6/b9/b10/	y1/y2/	2204.77	1868.94	#N/A	4	4073.71	1	1	1
3	12372	SunS_13_OVCAR3_HILIC_IntactGlycopeptide_F3.12372.12372.4.0.dta	4438.86	4	53.01	KLCPDCPLLAPLNDSR	N5H6F0S2	6-5-2-0-0	0	0	4	1	1	1	1	14	b1/b2/b3/b5/b6/b8/b9/b10/	y1/y2/y3/y6/y7/y11/	2569.9	1868.95	6298	4	4438.85	1	1	1
3	12382	SunS_13_OVCAR3_HILIC_IntactGlycopeptide_F3.12382.12382.3.0.dta	4073.71	3	53.05	KLCPDCPLLAPLNDSR	N4H5F0S2	5-4-2-0-0	-1	0	3	0	1	1	1	6	b3/b5/b6/b9/b10/	y2/	2204.77	1868.93	3424	3	4073.72	1	1	1
3	12388	SunS_13_OVCAR3_HILIC_IntactGlycopeptide_F3.12388.12388.5.0.dta	4073.72	5	53.08	KLCPDCPLLAPLNDSR	N4H5F0S2	5-4-2-0-0	-1	0	3	0	1	1	1	7	b1/b3/b5/b6/b8/b10/	y2/	2204.77	1868.95	5230	5	4073.71	1	1	1
3	12422	SunS_13_OVCAR3_HILIC_IntactGlycopeptide_F3.12422.12422.4.0.dta	4073.72	4	53.25	KLCPDCPLLAPLNDSR	N4H5F0S2	5-4-2-0-0	0	0	4	1	1	1	1	19	b1/b2/b3/b5/b6/b7/b8/b9/b10/b12/b14/	y1/y2/y3/y6/y7/y10/y11/y13/	2204.77	1868.94	5425	4	4073.73	1	1	1
3	12424	SunS_13_OVCAR3_HILIC_IntactGlycopeptide_F3.12424.12424.4.0.dta	4438.85	4	53.26	KLCPDCPLLAPLNDSR	N5H6F0S2	6-5-2-0-0	-2	0	3	0	1	1	1	7	b3/b5/b6/b9/b10/	y2/y6/	2569.9	1868.94	6834	4	4438.84	1	1	1
3	12431	SunS_13_OVCAR3_HILIC_IntactGlycopeptide_F3.12431.12431.3.0.dta	4073.71	3	53.3	KLCPDCPLLAPLNDSR	N4H5F0S2	5-4-2-0-0	0	0	4	1	1	1	1	11	b1/b3/b5/b6/b8/b9/b10/	y1/y2/y3/y6/	2204.77	1868.94	4824	3	4073.72	1	1	1
3	12447	SunS_13_OVCAR3_HILIC_IntactGlycopeptide_F3.12447.12447.5.0.dta	6312.47	5	53.38	SCGECIQAGPNCGWCTNSTFLQEGMPTSAR	N6H7F2S1	7-6-1-2-0	-3	0	1	0	0	0	1	11	b6/b7/b8/	y1/y3/y5/y7/y8/y9/y10/y11/	2936.06	3376.41	#N/A	5	6313.45	0	1	0
3	12470	SunS_13_OVCAR3_HILIC_IntactGlycopeptide_F3.12470.12470.4.0.dta	4073.71	4	53.51	KLCPDCPLLAPLNDSR	N4H5F0S2	5-4-2-0-0	0	0	4	1	1	1	1	14	b1/b2/b3/b5/b6/b8/b9/b10/	y1/y2/y3/y6/y7/y10/	2204.77	1868.94	6294	4	4073.72	1	1	1
3	12474	SunS_13_OVCAR3_HILIC_IntactGlycopeptide_F3.12474.12474.4.0.dta	4438.84	4	53.52	KLCPDCPLLAPLNDSR	N5H6F0S2	6-5-2-0-0	-2	0	3	0	1	1	1	7	b3/b5/b6/b10/b12/	y1/y2/	2569.9	1868.93	#N/A	2	2219.92	0	1	0
3	12481	SunS_13_OVCAR3_HILIC_IntactGlycopeptide_F3.12481.12481.3.0.dta	4073.71	3	53.56	KLCPDCPLLAPLNDSR	N4H5F0S2	5-4-2-0-0	0	0	4	1	1	1	1	11	b1/b3/b5/b6/b8/b9/b10/	y1/y2/y3/y6/	2204.77	1868.94	4596	3	4073.71	1	1	1
3	12488	SunS_13_OVCAR3_HILIC_IntactGlycopeptide_F3.12488.12488.5.0.dta	4073.71	5	53.59	KLCPDCPLLAPLNDSR	N4H5F0S2	5-4-2-0-0	-1	0	4	1	1	1	1	9	b1/b3/b5/b6/b8/b9/b10/	y2/y3/	2204.77	1868.94	4914	5	4073.71	1	1	1
3	12526	SunS_13_OVCAR3_HILIC_IntactGlycopeptide_F3.12526.12526.4.0.dta	4073.72	4	53.77	KLCPDCPLLAPLNDSR	N4H5F0S2	5-4-2-0-0	0	0	4	1	1	1	1	18	b1/b2/b3/b5/b6/b7/b8/b9/b10/b12/b14/	y1/y2/y3/y6/y7/y11/y13/	2204.77	1868.95	5618	4	4073.72	1	1	1
3	12539	SunS_13_OVCAR3_HILIC_IntactGlycopeptide_F3.12539.12539.3.0.dta	4073.71	3	53.82	KLCPDCPLLAPLNDSR	N4H5F0S2	5-4-2-0-0	0	0	4	1	1	1	1	11	b1/b2/b3/b5/b6/b8/b9/b10/	y1/y2/y6/	2204.77	1868.94	5343	3	4073.71	1	1	1
3	12546	SunS_13_OVCAR3_HILIC_IntactGlycopeptide_F3.12546.12546.5.0.dta	4073.7	5	53.85	KLCPDCPLLAPLNDSR	N4H5F0S2	5-4-2-0-0	-2	0	3	0	1	1	1	9	b1/b3/b5/b6/b8/b9/b10/	y1/y2/	2204.77	1868.93	6379	5	4073.71	1	1	1
3	12584	SunS_13_OVCAR3_HILIC_IntactGlycopeptide_F3.12584.12584.3.0.dta	4019.67	3	54.01	LCPDCPLLAPLNDSR	N5H6F0S1	6-5-1-0-0	-2	0	3	1	0	1	1	11	b2/b5/b6/b7/b8/b9/	y2/y3/y6/y7/y13/	2278.81	1740.86	4411	3	4019.66	1	1	1
3	12587	SunS_13_OVCAR3_HILIC_IntactGlycopeptide_F3.12587.12587.4.0.dta	4073.72	4	54.03	KLCPDCPLLAPLNDSR	N4H5F0S2	5-4-2-0-0	0	0	4	1	1	1	1	13	b1/b3/b5/b6/b8/b9/b10/	y1/y2/y3/y6/y7/y11/	2204.77	1868.95	4961	4	4073.72	1	1	1
3	12600	SunS_13_OVCAR3_HILIC_IntactGlycopeptide_F3.12600.12600.3.0.dta	4073.71	3	54.08	KLCPDCPLLAPLNDSR	N4H5F0S2	5-4-2-0-0	-2	0	3	0	1	1	1	7	b1/b3/b5/b6/b9/b10/	y2/	2204.77	1868.93	5451	3	4073.72	1	1	1
3	12642	SunS_13_OVCAR3_HILIC_IntactGlycopeptide_F3.12642.12642.4.0.dta	4073.71	4	54.28	KLCPDCPLLAPLNDSR	N4H5F0S2	5-4-2-0-0	-2	0	2	0	0	1	1	7	b3/b5/b6/b9/b10/	y1/y2/	2204.77	1868.94	6665	4	4073.72	1	1	1
3	12693	SunS_13_OVCAR3_HILIC_IntactGlycopeptide_F3.12693.12693.4.0.dta	4019.65	4	54.52	LCPDCPLLAPLNDSR	N5H6F0S1	6-5-1-0-0	-2	0	4	1	1	1	1	15	b2/b3/b4/b5/b6/b7/b8/b9/	y1/y2/y3/y6/y7/y11/y13/	2278.81	1740.84	4900	4	4019.66	1	1	1
3	12696	SunS_13_OVCAR3_HILIC_IntactGlycopeptide_F3.12696.12696.3.0.dta	4019.64	3	54.53	LCPDCPLLAPLNDSR	N5H6F0S1	6-5-1-0-0	0	0	3	1	0	1	1	11	b2/b3/b4/b5/b6/b7/b8/b9/	y2/y6/y7/	2278.81	1740.84	4755	3	4019.66	1	1	1
3	12738	SunS_13_OVCAR3_HILIC_IntactGlycopeptide_F3.12738.12738.4.0.dta	3654.52	4	54.74	LCPDCPLLAPLNDSR	N4H5F0S1	5-4-1-0-0	-1	0	3	1	0	1	1	7	b2/b5/b7/b8/	y2/y6/y13/	1913.68	1740.85	6144	4	3654.52	1	1	1
3	12794	SunS_13_OVCAR3_HILIC_IntactGlycopeptide_F3.12794.12794.3.0.dta	3480.54	3	55	KTYAIYDLLDTAMINNSR	N2H6F0S0	6-2-0-0-0	0	0	4	1	1	1	1	25	b1/b2/b3/b4/b5/b6/b7/b8/b9/b10/b11/b12/b13/b14/	y1/y2/y3/y4/y7/y8/y9/y10/y11/y12/y13/	1378.48	2102.06	3525	3	3480.54	1	0	0
3	12795	SunS_13_OVCAR3_HILIC_IntactGlycopeptide_F3.12795.12795.4.0.dta	3480.54	4	55	KTYAIYDLLDTAMINNSR	N2H6F0S0	6-2-0-0-0	0	0	2	0	1	0	1	22	b1/b2/b3/b4/b5/b6/b7/b8/b9/b10/b11/b12/b13/b14/	y1/y2/y3/y5/y8/y9/y11/y13/	1378.48	2102.06	3448	4	3480.54	1	0	0
3	12823	SunS_13_OVCAR3_HILIC_IntactGlycopeptide_F3.12823.12823.4.0.dta	3654.52	4	55.14	LCPDCPLLAPLNDSR	N4H5F0S1	5-4-1-0-0	0	0	2	1	0	1	0	10	b2/b3/b4/b5/b7/b8/b9/	y1/y2/y6/	1913.68	1740.84	#N/A	2	1827.76	0	1	0
3	12838	SunS_13_OVCAR3_HILIC_IntactGlycopeptide_F3.12838.12838.5.0.dta	5368.26	5	55.21	VSLEHLLSYPQNFSCVHHALR	N5H6F0S3	6-5-3-0-0	0	0	2	0	1	0	1	14	b5/b6/b7/b8/b9/b11/	y1/y3/y4/y5/y6/y7/y8/y9/	2861	2507.26	#N/A	5	5368.26	1	1	1
3	12846	SunS_13_OVCAR3_HILIC_IntactGlycopeptide_F3.12846.12846.4.0.dta	5173.11	4	55.24	YAIQYFNNNTSHSHLFDLK	N5H6F0S3	6-5-3-0-0	0	0	3	0	1	1	1	8	b2/b9/	y2/y4/y5/y6/y7/y9/	2861	2312.11	#N/A	4	5173.12	1	1	1
3	12889	SunS_13_OVCAR3_HILIC_IntactGlycopeptide_F3.12889.12889.5.0.dta	5173.12	5	55.42	YAIQYFNNNTSHSHLFDLK	N5H6F0S3	6-5-3-0-0	-2	0	3	0	1	1	1	7	b2/b9/	y3/y4/y5/y6/y7/	2861	2312.12	#N/A	5	5173.12	1	1	1
3	12901	SunS_13_OVCAR3_HILIC_IntactGlycopeptide_F3.12901.12901.5.0.dta	5368.26	5	55.47	VSLEHLLSYPQNFSCVHHALR	N5H6F0S3	6-5-3-0-0	-3	0	2	0	1	0	1	7	b2/b5/b6/b7/b8/	y1/y5/	2861	2507.26	#N/A	5	5368.26	1	1	1
3	13127	SunS_13_OVCAR3_HILIC_IntactGlycopeptide_F3.13127.13127.4.0.dta	4325.86	4	56.74	FFQNVTAEDTDSIGLALFAPHSSR	N2H8F0S0	8-2-0-0-0	-2	0	2	0	1	0	1	12	b3/b5/	y1/y3/y5/y6/y7/y8/y9/y11/y13/y19/	1702.58	2623.28	1332	4	4325.86	1	1	1
3	13146	SunS_13_OVCAR3_HILIC_IntactGlycopeptide_F3.13146.13146.3.0.dta	4325.85	3	56.82	FFQNVTAEDTDSIGLALFAPHSSR	N2H8F0S0	8-2-0-0-0	-1	0	2	0	1	0	1	15	b5/	y1/y2/y3/y5/y6/y7/y8/y9/y11/y13/y15/y16/y17/y19/	1702.58	2623.27	10562	3	4326.87	0	1	0
3	13159	SunS_13_OVCAR3_HILIC_IntactGlycopeptide_F3.13159.13159.4.0.dta	4163.79	4	56.87	FFQNVTAEDTDSIGLALFAPHSSR	N2H7F0S0	7-2-0-0-0	-1	0	2	0	1	0	1	10	b4/b5/	y3/y5/y6/y7/y8/y9/y11/y13/	1540.53	2623.27	787	4	4163.8	1	1	1
3	13327	SunS_13_OVCAR3_HILIC_IntactGlycopeptide_F3.13327.13327.3.0.dta	3453.5	3	57.79	DYYPINESLASLPLR	N2H8F0S0	8-2-0-0-0	-1	0	2	1	0	1	0	11	b2/b3/	y1/y3/y4/y5/y6/y7/y8/y9/y12/	1702.58	1750.91	#N/A	3	3452.5	0	1	0
3	13386	SunS_13_OVCAR3_HILIC_IntactGlycopeptide_F3.13386.13386.4.0.dta	4083.78	4	58.11	YHYNASLLDGTLLDSTWNLGK	N2H8F0S0	8-2-0-0-0	0	0	2	0	1	0	1	15	b2/b3/b5/	y2/y3/y4/y5/y7/y8/y9/y10/y12/y13/y14/y16/	1702.58	2381.19	931	4	4083.76	1	1	1
3	13397	SunS_13_OVCAR3_HILIC_IntactGlycopeptide_F3.13397.13397.3.0.dta	4083.76	3	58.17	YHYNASLLDGTLLDSTWNLGK	N2H8F0S0	8-2-0-0-0	-2	0	2	0	1	0	1	11	b2/b3/b5/	y2/y4/y5/y7/y8/y9/y12/y13/	1702.58	2381.18	728	3	4083.76	1	1	1
3	13398	SunS_13_OVCAR3_HILIC_IntactGlycopeptide_F3.13398.13398.3.0.dta	3129.39	3	58.17	DYYPINESLASLPLR	N2H6F0S0	6-2-0-0-0	-1	0	2	1	0	1	0	12	b2/b3/	y1/y3/y4/y5/y6/y7/y8/y9/y12/y13/	1378.48	1750.91	1627	3	3129.38	1	1	1
3	13474	SunS_13_OVCAR3_HILIC_IntactGlycopeptide_F3.13474.13474.3.0.dta	2704.2	3	58.63	DNATEEEILVYLEK	N2H3F1S0	3-2-0-1-0	0	0	2	1	0	1	0	14	b2/b3/b4/b7/b9/	y1/y3/y4/y5/y6/y8/y9/y10/y11/	1038.38	1665.83	49	3	2704.2	1	1	1
3	13693	SunS_13_OVCAR3_HILIC_IntactGlycopeptide_F3.13693.13693.4.0.dta	3820.72	4	59.96	DVVTAAGDMLKDNATEEEILVYLEK	N2H4F0S0	4-2-0-0-0	0	0	1	0	1	0	0	19	b2/b3/b4/b5/b6/b7/b12/	y1/y2/y3/y4/y5/y6/y7/y8/y9/y10/y11/y12/	1054.37	2766.35	980	4	3820.75	1	0	0
3	13707	SunS_13_OVCAR3_HILIC_IntactGlycopeptide_F3.13707.13707.3.0.dta	3820.77	3	60.02	DVVTAAGDMLKDNATEEEILVYLEK	N2H4F0S0	4-2-0-0-0	-2	0	1	0	0	0	1	10	b2/b3/b4/	y1/y2/y3/y4/y5/y6/y7/	1054.37	2766.4	1865	3	3820.75	1	0	0
3	13718	SunS_13_OVCAR3_HILIC_IntactGlycopeptide_F3.13718.13718.5.0.dta	5950.56	5	60.07	RPTGEVYDIEIDTLETTCHVLDPTPLANCSVR	N5H6F0S1	6-5-1-0-0	-3	0	1	0	0	0	1	10	b2/b8/b9/b10/b11/b12/b15/b22/	y1/y10/	2278.81	3671.75	#N/A	5	5951.59	0	1	0
3	13736	SunS_13_OVCAR3_HILIC_IntactGlycopeptide_F3.13736.13736.6.0.dta	5950.58	6	60.13	RPTGEVYDIEIDTLETTCHVLDPTPLANCSVR	N5H6F0S1	6-5-1-0-0	-3	0	1	0	0	0	1	19	b2/b5/b6/b7/b8/b9/b10/b11/b12/b13/b14/b15/b22/	y1/y2/y3/y4/y8/y10/	2278.81	3671.77	4864	6	5950.59	1	1	1
3	13751	SunS_13_OVCAR3_HILIC_IntactGlycopeptide_F3.13751.13751.7.0.dta	6096.61	7	60.19	RPTGEVYDIEIDTLETTCHVLDPTPLANCSVR	N5H6F1S1	6-5-1-1-0	-3	0	1	0	0	0	1	12	b2/b4/b5/b6/b8/b9/b10/b11/b12/b14/	y1/y4/	2424.87	3671.75	#N/A	7	6099.64	0	1	0
3	13790	SunS_13_OVCAR3_HILIC_IntactGlycopeptide_F3.13790.13790.5.0.dta	5950.56	5	60.33	RPTGEVYDIEIDTLETTCHVLDPTPLANCSVR	N5H6F0S1	6-5-1-0-0	-3	0	2	0	1	0	1	28	b1/b2/b3/b4/b5/b6/b7/b8/b9/b10/b11/b12/b13/b14/b15/b16/b17/b18/b22/	y1/y3/y4/y8/y10/y11/y12/y17/y20/	2278.81	3671.75	11987	5	5951.59	0	1	0
3	13820	SunS_13_OVCAR3_HILIC_IntactGlycopeptide_F3.13820.13820.6.0.dta	5950.56	6	60.41	RPTGEVYDIEIDTLETTCHVLDPTPLANCSVR	N5H6F0S1	6-5-1-0-0	-3	0	1	0	0	0	1	27	b1/b2/b3/b5/b6/b7/b8/b9/b10/b11/b12/b13/b14/b15/b17/b18/b22/	y1/y3/y4/y5/y8/y10/y11/y12/y14/y17/	2278.81	3671.75	5662	6	5950.58	1	1	1
3	13821	SunS_13_OVCAR3_HILIC_IntactGlycopeptide_F3.13821.13821.5.0.dta	6096.66	5	60.41	RPTGEVYDIEIDTLETTCHVLDPTPLANCSVR	N5H6F1S1	6-5-1-1-0	-3	0	1	0	0	0	1	14	b2/b5/b7/b8/b9/b10/b11/b12/b13/b15/b22/	y1/y4/y10/	2424.87	3671.79	6054	5	6097.63	0	1	0
3	13830	SunS_13_OVCAR3_HILIC_IntactGlycopeptide_F3.13830.13830.7.0.dta	5950.58	7	60.45	RPTGEVYDIEIDTLETTCHVLDPTPLANCSVR	N5H6F0S1	6-5-1-0-0	-3	0	1	0	0	0	1	20	b2/b5/b6/b7/b8/b9/b10/b11/b12/b13/b14/b15/b17/b22/	y1/y3/y4/y8/y10/y12/	2278.81	3671.77	12785	7	5953.55	0	1	0
3	13831	SunS_13_OVCAR3_HILIC_IntactGlycopeptide_F3.13831.13831.5.0.dta	5731.5	5	60.45	RPTGEVYDIEIDTLETTCHVLDPTPLANCSVR	N4H5F1S1	5-4-1-1-0	-3	0	1	0	0	0	1	14	b2/b5/b6/b7/b8/b9/b10/b11/b12/b15/	y1/y3/y10/y12/	2059.73	3671.76	#N/A	5	5731.5	1	1	1
3	13832	SunS_13_OVCAR3_HILIC_IntactGlycopeptide_F3.13832.13832.6.0.dta	6096.6	6	60.45	RPTGEVYDIEIDTLETTCHVLDPTPLANCSVR	N5H6F1S1	6-5-1-1-0	0	0	1	0	0	0	1	14	b2/b6/b7/b8/b9/b10/b11/b12/b15/	y1/y4/y8/y10/y17/	2424.87	3671.74	#N/A	3	3048.81	0	1	0
3	13833	SunS_13_OVCAR3_HILIC_IntactGlycopeptide_F3.13833.13833.4.0.dta	6096.6	4	60.45	RPTGEVYDIEIDTLETTCHVLDPTPLANCSVR	N5H6F1S1	6-5-1-1-0	-3	0	1	0	0	0	1	6	b2/b8/b10/b12/b15/b22/		2424.87	3671.73	10358	4	6096.63	1	1	1
3	13842	SunS_13_OVCAR3_HILIC_IntactGlycopeptide_F3.13842.13842.4.0.dta	5585.39	4	60.47	RPTGEVYDIEIDTLETTCHVLDPTPLANCSVR	N4H5F0S1	5-4-1-0-0	-3	0	1	0	0	0	1	8	b2/b8/b9/b12/b22/	y1/y10/y11/	1913.68	3671.71	#N/A	2	2793.72	0	1	0
3	13849	SunS_13_OVCAR3_HILIC_IntactGlycopeptide_F3.13849.13849.6.0.dta	5585.44	6	60.49	RPTGEVYDIEIDTLETTCHVLDPTPLANCSVR	N4H5F0S1	5-4-1-0-0	-2	0	1	0	0	0	1	18	b2/b5/b6/b7/b8/b9/b10/b11/b12/b14/b15/b18/	y1/y2/y3/y4/y8/y10/	1913.68	3671.76	4880	6	5585.45	1	1	1
3	13883	SunS_13_OVCAR3_HILIC_IntactGlycopeptide_F3.13883.13883.5.0.dta	5950.56	5	60.59	RPTGEVYDIEIDTLETTCHVLDPTPLANCSVR	N5H6F0S1	6-5-1-0-0	-3	0	2	0	1	0	1	23	b2/b3/b5/b6/b7/b8/b9/b10/b11/b12/b13/b14/b15/b16/b18/b22/	y1/y3/y4/y10/y12/y17/y20/	2278.81	3671.75	12064	5	5951.58	0	1	0
3	13892	SunS_13_OVCAR3_HILIC_IntactGlycopeptide_F3.13892.13892.4.0.dta	5950.56	4	60.62	RPTGEVYDIEIDTLETTCHVLDPTPLANCSVR	N5H6F0S1	6-5-1-0-0	-3	0	2	0	1	0	1	19	b2/b5/b6/b7/b8/b9/b10/b11/b12/b13/b14/b15/b16/b22/	y1/y3/y4/y10/y17/	2278.81	3671.75	7151	4	5950.56	1	1	1
3	13898	SunS_13_OVCAR3_HILIC_IntactGlycopeptide_F3.13898.13898.3.0.dta	5585.41	3	60.65	RPTGEVYDIEIDTLETTCHVLDPTPLANCSVR	N4H5F0S1	5-4-1-0-0	-3	0	1	0	0	0	1	15	b1/b2/b5/b7/b8/b9/b10/b11/b12/b15/b18/b22/	y1/y4/y10/	1913.68	3671.74	4723	3	5585.38	1	1	1
3	13902	SunS_13_OVCAR3_HILIC_IntactGlycopeptide_F3.13902.13902.5.0.dta	5585.47	5	60.66	RPTGEVYDIEIDTLETTCHVLDPTPLANCSVR	N4H5F0S1	5-4-1-0-0	-3	0	2	0	1	0	1	29	b1/b2/b3/b4/b5/b6/b7/b8/b9/b10/b11/b12/b13/b14/b15/b16/b17/b18/b22/	y1/y2/y3/y4/y6/y8/y10/y11/y12/y17/	1913.68	3671.79	4827	5	5585.5	1	1	1
3	13904	SunS_13_OVCAR3_HILIC_IntactGlycopeptide_F3.13904.13904.6.0.dta	5950.57	6	60.67	RPTGEVYDIEIDTLETTCHVLDPTPLANCSVR	N5H6F0S1	6-5-1-0-0	-3	0	2	0	1	0	1	20	b2/b5/b6/b7/b8/b9/b10/b11/b12/b13/b14/b15/b18/b22/	y1/y3/y4/y8/y10/y17/	2278.81	3671.76	6100	6	5950.56	1	1	1
3	13915	SunS_13_OVCAR3_HILIC_IntactGlycopeptide_F3.13915.13915.5.0.dta	5731.47	5	60.7	RPTGEVYDIEIDTLETTCHVLDPTPLANCSVR	N4H5F1S1	5-4-1-1-0	-4	0	1	0	0	0	1	12	b2/b8/b9/b10/b11/b12/b14/b15/b22/	y1/y4/y17/	2059.73	3671.74	#N/A	5	5732.49	0	1	0
3	13917	SunS_13_OVCAR3_HILIC_IntactGlycopeptide_F3.13917.13917.4.0.dta	5731.49	4	60.71	RPTGEVYDIEIDTLETTCHVLDPTPLANCSVR	N4H5F1S1	5-4-1-1-0	-2	0	1	0	0	0	1	7	b2/b8/b9/b11/b12/b22/	y10/	2059.73	3671.76	8746	4	5731.51	1	1	1
3	13923	SunS_13_OVCAR3_HILIC_IntactGlycopeptide_F3.13923.13923.4.0.dta	5585.42	4	60.73	RPTGEVYDIEIDTLETTCHVLDPTPLANCSVR	N4H5F0S1	5-4-1-0-0	-3	0	2	0	1	0	1	24	b1/b2/b5/b6/b7/b8/b9/b10/b11/b12/b13/b14/b15/b16/b18/b22/	y1/y2/y3/y4/y10/y12/y17/y20/	1913.68	3671.74	6341	4	5585.44	1	1	1
3	13927	SunS_13_OVCAR3_HILIC_IntactGlycopeptide_F3.13927.13927.6.0.dta	5585.43	6	60.75	RPTGEVYDIEIDTLETTCHVLDPTPLANCSVR	N4H5F0S1	5-4-1-0-0	-3	0	1	0	0	0	1	29	b1/b2/b3/b4/b5/b6/b7/b8/b9/b10/b11/b12/b13/b14/b15/b16/b17/b18/b22/	y1/y2/y3/y4/y6/y8/y10/y11/y12/y13/	1913.68	3671.75	4480	6	5585.43	1	1	1
3	13933	SunS_13_OVCAR3_HILIC_IntactGlycopeptide_F3.13933.13933.6.0.dta	5731.48	6	60.78	RPTGEVYDIEIDTLETTCHVLDPTPLANCSVR	N4H5F1S1	5-4-1-1-0	-3	0	1	0	0	0	1	13	b2/b5/b6/b7/b8/b9/b10/b11/b12/b15/	y1/y8/y10/	2059.73	3671.74	12588	6	5734.5	0	1	0
3	13957	SunS_13_OVCAR3_HILIC_IntactGlycopeptide_F3.13957.13957.5.0.dta	5950.58	5	60.84	RPTGEVYDIEIDTLETTCHVLDPTPLANCSVR	N5H6F0S1	6-5-1-0-0	-3	0	1	0	0	0	1	17	b2/b5/b6/b7/b8/b9/b10/b11/b12/b15/b18/b22/	y1/y3/y4/y10/y17/	2278.81	3671.77	13350	5	5951.56	0	1	0
3	13974	SunS_13_OVCAR3_HILIC_IntactGlycopeptide_F3.13974.13974.3.0.dta	5585.46	3	60.9	RPTGEVYDIEIDTLETTCHVLDPTPLANCSVR	N4H5F0S1	5-4-1-0-0	0	0	1	0	0	0	1	11	b2/b8/b9/b10/b11/b12/b15/b18/b22/	y1/y10/	1913.68	3671.78	5354	3	5585.45	1	1	1
3	13977	SunS_13_OVCAR3_HILIC_IntactGlycopeptide_F3.13977.13977.5.0.dta	5585.45	5	60.92	RPTGEVYDIEIDTLETTCHVLDPTPLANCSVR	N4H5F0S1	5-4-1-0-0	-3	0	2	0	1	0	1	24	b2/b4/b5/b6/b7/b8/b9/b10/b11/b12/b13/b14/b15/b16/b18/b22/	y1/y3/y4/y8/y10/y11/y12/y17/	1913.68	3671.78	4822	5	5585.46	1	1	1
3	13981	SunS_13_OVCAR3_HILIC_IntactGlycopeptide_F3.13981.13981.6.0.dta	5950.56	6	60.93	RPTGEVYDIEIDTLETTCHVLDPTPLANCSVR	N5H6F0S1	6-5-1-0-0	-3	0	1	0	0	0	1	15	b2/b5/b6/b7/b8/b9/b10/b11/b12/b13/b15/	y1/y4/y10/y11/	2278.81	3671.75	12188	6	5951.57	0	1	0
3	13987	SunS_13_OVCAR3_HILIC_IntactGlycopeptide_F3.13987.13987.5.0.dta	5731.5	5	60.96	RPTGEVYDIEIDTLETTCHVLDPTPLANCSVR	N4H5F1S1	5-4-1-1-0	-3	0	1	0	0	0	1	7	b2/b8/b10/b12/b13/	y4/y5/	2059.73	3671.76	#N/A	5	5731.48	1	1	1
3	13997	SunS_13_OVCAR3_HILIC_IntactGlycopeptide_F3.13997.13997.4.0.dta	5585.44	4	60.99	RPTGEVYDIEIDTLETTCHVLDPTPLANCSVR	N4H5F0S1	5-4-1-0-0	-3	0	2	0	1	0	1	26	b1/b2/b4/b5/b6/b7/b8/b9/b10/b11/b12/b13/b14/b15/b16/b17/b18/b22/	y1/y3/y4/y10/y12/y14/y17/y20/	1913.68	3671.77	6149	4	5585.44	1	1	1
3	14009	SunS_13_OVCAR3_HILIC_IntactGlycopeptide_F3.14009.14009.6.0.dta	5585.41	6	61.02	RPTGEVYDIEIDTLETTCHVLDPTPLANCSVR	N4H5F0S1	5-4-1-0-0	-3	0	1	0	0	0	1	27	b1/b2/b4/b5/b6/b7/b8/b9/b10/b11/b12/b13/b14/b15/b16/b17/b18/b22/	y1/y3/y4/y6/y8/y10/y11/y12/y17/	1913.68	3671.73	3745	6	5585.44	1	1	1
3	14031	SunS_13_OVCAR3_HILIC_IntactGlycopeptide_F3.14031.14031.5.0.dta	5950.56	5	61.1	RPTGEVYDIEIDTLETTCHVLDPTPLANCSVR	N5H6F0S1	6-5-1-0-0	-3	0	1	0	0	0	1	11	b2/b5/b8/b9/b10/b11/b12/b15/	y1/y9/y17/	2278.81	3671.75	#N/A	5	5951.57	0	1	0
3	14045	SunS_13_OVCAR3_HILIC_IntactGlycopeptide_F3.14045.14045.5.0.dta	5585.44	5	61.17	RPTGEVYDIEIDTLETTCHVLDPTPLANCSVR	N4H5F0S1	5-4-1-0-0	-3	0	2	0	1	0	1	20	b2/b5/b6/b7/b8/b9/b10/b11/b12/b13/b14/b15/b17/b18/b22/	y1/y3/y4/y10/y17/	1913.68	3671.77	5595	5	5585.45	1	1	1
3	14060	SunS_13_OVCAR3_HILIC_IntactGlycopeptide_F3.14060.14060.4.0.dta	5585.43	4	61.25	RPTGEVYDIEIDTLETTCHVLDPTPLANCSVR	N4H5F0S1	5-4-1-0-0	0	0	2	0	1	0	1	17	b2/b5/b6/b7/b8/b9/b10/b11/b12/b15/b22/	y1/y4/y10/y12/y17/y20/	1913.68	3671.75	7519	4	5585.43	1	1	1
3	14073	SunS_13_OVCAR3_HILIC_IntactGlycopeptide_F3.14073.14073.4.0.dta	3879.68	4	61.3	TQNFTLLVQGSPELK	N4H5F0S2	5-4-2-0-0	-1	0	2	1	0	1	0	10	b2/b4/	y4/y5/y6/y7/y8/y9/y10/y11/	2204.77	1674.91	#N/A	2	1940.84	0	1	0
3	14083	SunS_13_OVCAR3_HILIC_IntactGlycopeptide_F3.14083.14083.5.0.dta	5950.56	5	61.35	RPTGEVYDIEIDTLETTCHVLDPTPLANCSVR	N5H6F0S1	6-5-1-0-0	-3	0	1	0	0	0	1	6	b2/b8/b10/b11/b12/	y1/	2278.81	3671.75	13139	5	5951.58	0	1	0
3	14515	SunS_13_OVCAR3_HILIC_IntactGlycopeptide_F3.14515.14515.4.0.dta	4474.91	4	64.04	IETVLPAEFFEVLSSSQNGSYHR	N2H9F0S0	9-2-0-0-0	-2	0	1	0	0	0	1	8	b2/b3/b4/b5/	y1/y3/y5/y10/	1864.63	2610.28	3746	4	4474.93	1	1	1
3	14521	SunS_13_OVCAR3_HILIC_IntactGlycopeptide_F3.14521.14521.3.0.dta	4474.91	3	64.07	IETVLPAEFFEVLSSSQNGSYHR	N2H9F0S0	9-2-0-0-0	-2	0	2	0	1	0	1	13	b2/b3/b4/b5/b11/	y1/y2/y3/y4/y5/y10/y11/y18/	1864.63	2610.27	3840	3	4474.92	1	1	1
3	14567	SunS_13_OVCAR3_HILIC_IntactGlycopeptide_F3.14567.14567.4.0.dta	4474.94	4	64.29	IETVLPAEFFEVLSSSQNGSYHR	N2H9F0S0	9-2-0-0-0	-2	0	2	0	1	0	1	17	b2/b3/b4/b5/b8/b9/b11/	y1/y2/y3/y4/y5/y7/y8/y10/y11/y18/	1864.63	2610.31	3717	4	4474.93	1	1	1
3	14573	SunS_13_OVCAR3_HILIC_IntactGlycopeptide_F3.14573.14573.3.0.dta	4474.93	3	64.33	IETVLPAEFFEVLSSSQNGSYHR	N2H9F0S0	9-2-0-0-0	0	0	2	0	1	0	1	9	b2/b3/b4/b5/	y1/y3/y4/y5/y18/	1864.63	2610.29	3554	3	4474.92	1	1	1
3	14605	SunS_13_OVCAR3_HILIC_IntactGlycopeptide_F3.14605.14605.5.0.dta	6241.65	5	64.52	RPTGEVYDIEIDTLETTCHVLDPTPLANCSVR	N5H6F0S2	6-5-2-0-0	-3	0	1	0	0	0	1	7	b2/b8/b9/b10/b12/b22/	y17/	2569.9	3671.75	#N/A	5	6241.69	1	1	1
3	14613	SunS_13_OVCAR3_HILIC_IntactGlycopeptide_F3.14613.14613.4.0.dta	4474.91	4	64.55	IETVLPAEFFEVLSSSQNGSYHR	N2H9F0S0	9-2-0-0-0	-2	0	1	0	0	0	1	12	b2/b3/b4/b5/b8/	y1/y2/y4/y5/y10/y11/y18/	1864.63	2610.28	3528	4	4474.92	1	1	1
3	14675	SunS_13_OVCAR3_HILIC_IntactGlycopeptide_F3.14675.14675.7.0.dta	6241.69	7	64.9	RPTGEVYDIEIDTLETTCHVLDPTPLANCSVR	N5H6F0S2	6-5-2-0-0	-3	0	1	0	0	0	1	13	b2/b5/b6/b7/b8/b9/b10/b11/b12/b13/	y1/y4/y10/	2569.9	3671.79	#N/A	7	6244.68	0	1	0
3	14687	SunS_13_OVCAR3_HILIC_IntactGlycopeptide_F3.14687.14687.5.0.dta	5876.54	5	64.97	RPTGEVYDIEIDTLETTCHVLDPTPLANCSVR	N4H5F0S2	5-4-2-0-0	0	0	1	0	0	0	1	8	b2/b8/b9/b10/b12/b22/	y1/y2/	2204.77	3671.77	#N/A	5	5877.55	0	1	0
3	14699	SunS_13_OVCAR3_HILIC_IntactGlycopeptide_F3.14699.14699.5.0.dta	6241.69	5	65.03	RPTGEVYDIEIDTLETTCHVLDPTPLANCSVR	N5H6F0S2	6-5-2-0-0	-3	0	1	0	0	0	1	11	b2/b8/b9/b10/b11/b12/b22/	y1/y4/y10/y17/	2569.9	3671.79	#N/A	5	6242.69	0	1	0
3	14706	SunS_13_OVCAR3_HILIC_IntactGlycopeptide_F3.14706.14706.6.0.dta	6241.69	6	65.07	RPTGEVYDIEIDTLETTCHVLDPTPLANCSVR	N5H6F0S2	6-5-2-0-0	-2	0	1	0	0	0	1	7	b2/b6/b7/b8/b10/b11/b12/		2569.9	3671.78	#N/A	6	6241.68	1	1	1
3	15077	SunS_13_OVCAR3_HILIC_IntactGlycopeptide_F3.15077.15077.4.0.dta	5243.17	4	67.35	DSLNSSHPISSSVQSSEQIEEMFDSLSYFK	N2H9F0S0	9-2-0-0-0	-2	0	2	0	1	0	1	15	b10/b13/	y1/y2/y3/y4/y5/y6/y7/y8/y9/y10/y11/y12/y13/	1864.63	3378.54	8241	4	5243.17	1	0	0
3	15175	SunS_13_OVCAR3_HILIC_IntactGlycopeptide_F3.15175.15175.4.0.dta	4311.83	4	68	GLGFNLTELAEAEIHK	N5H6F0S2	6-5-2-0-0	-2	0	4	1	1	1	1	6		y4/y6/y7/y8/y9/y10/	2569.9	1741.93	4785	4	4311.83	1	1	1
3	15222	SunS_13_OVCAR3_HILIC_IntactGlycopeptide_F3.15222.15222.4.0.dta	4311.82	4	68.26	GLGFNLTELAEAEIHK	N5H6F0S2	6-5-2-0-0	-2	0	4	1	1	1	1	16	b3/b6/b8/b9/b14/	y1/y2/y3/y4/y5/y6/y7/y8/y9/y10/y11/	2569.9	1741.92	4734	4	4311.83	1	1	1
3	15233	SunS_13_OVCAR3_HILIC_IntactGlycopeptide_F3.15233.15233.3.0.dta	4311.82	3	68.31	GLGFNLTELAEAEIHK	N5H6F0S2	6-5-2-0-0	-1	0	4	1	1	1	1	7		y2/y5/y6/y7/y8/y9/y10/	2569.9	1741.91	#N/A	3	4310.75	0	1	0
3	15276	SunS_13_OVCAR3_HILIC_IntactGlycopeptide_F3.15276.15276.4.0.dta	4311.83	4	68.52	GLGFNLTELAEAEIHK	N5H6F0S2	6-5-2-0-0	-3	0	4	1	1	1	1	28	b2/b3/b4/b5/b6/b7/b8/b9/b10/b11/b12/b13/b14/b15/	y1/y2/y3/y4/y5/y6/y7/y8/y9/y10/y11/y12/y13/y14/	2569.9	1741.92	#N/A	4	4311.83	1	1	1
3	15277	SunS_13_OVCAR3_HILIC_IntactGlycopeptide_F3.15277.15277.4.0.dta	4311.82	4	68.52	GLGFNLTELAEAEIHK	N5H6F0S2	6-5-2-0-0	-2	0	4	1	1	1	1	24	b2/b3/b5/b6/b7/b8/b9/b10/b12/b13/b14/	y1/y2/y3/y4/y5/y6/y7/y8/y9/y10/y11/y12/y14/	2569.9	1741.91	2360	4	4311.83	1	1	1
3	15290	SunS_13_OVCAR3_HILIC_IntactGlycopeptide_F3.15290.15290.3.0.dta	4311.81	3	68.57	GLGFNLTELAEAEIHK	N5H6F0S2	6-5-2-0-0	-2	0	4	1	1	1	1	22	b3/b6/b7/b8/b9/b10/b11/b12/b14/b15/	y2/y3/y4/y5/y6/y7/y8/y9/y10/y11/y12/y14/	2569.9	1741.91	2692	3	4311.82	1	1	1
3	15365	SunS_13_OVCAR3_HILIC_IntactGlycopeptide_F3.15365.15365.4.0.dta	4311.83	4	69.04	GLGFNLTELAEAEIHK	N5H6F0S2	6-5-2-0-0	-2	0	4	1	1	1	1	10	b5/	y2/y3/y4/y6/y7/y8/y9/y10/y11/	2569.9	1741.93	3088	4	4311.83	1	1	1
3	16424	SunS_13_OVCAR3_HILIC_IntactGlycopeptide_F3.16424.16424.4.0.dta	4602.92	4	75.89	GLGFNLTELAEAEIHK	N5H6F0S3	6-5-3-0-0	-2	0	4	1	1	1	1	6		y2/y5/y6/y7/y8/y10/	2861	1741.92	4269	4	4602.92	1	1	1
3	16625	SunS_13_OVCAR3_HILIC_IntactGlycopeptide_F3.16625.16625.4.0.dta	4602.9	4	77.24	GLGFNLTELAEAEIHK	N5H6F0S3	6-5-3-0-0	-2	0	4	1	1	1	1	12	b12/	y1/y2/y3/y4/y5/y6/y7/y8/y9/y10/y11/	2861	1741.9	5030	4	4602.92	1	1	1
3	16733	SunS_13_OVCAR3_HILIC_IntactGlycopeptide_F3.16733.16733.4.0.dta	4602.92	4	77.93	GLGFNLTELAEAEIHK	N5H6F0S3	6-5-3-0-0	-2	0	4	1	1	1	1	6		y2/y5/y6/y7/y8/y10/	2861	1741.92	3400	4	4602.92	1	1	1
3	18501	SunS_13_OVCAR3_HILIC_IntactGlycopeptide_F3.18501.18501.4.0.dta	4810.08	4	90.04	VVGVPYQGNATAFFILPR	N5H6F0S3	6-5-3-0-0	-2	0	3	1	0	1	1	11	b2/b3/b4/	y2/y3/y4/y5/y6/y7/y8/y14/	2861	1949.08	4206	4	4810.07	1	1	1
4	3679	SunS_13_OVCAR3_HILIC_IntactGlycopeptide_F4.3679.3679.4.0.dta	4862.93	4	24.13	YVHNHNTYTNNENCSSPSWQAQHESR	N2H8F0S0	8-2-0-0-0	-2	0	2	0	1	0	1	15	b1/b3/b6/b12/	y1/y2/y3/y4/y5/y6/y7/y10/y11/y12/y14/	1702.58	3160.35	#N/A	4	4862.92	1	0	0
4	3680	SunS_13_OVCAR3_HILIC_IntactGlycopeptide_F4.3680.3680.5.0.dta	4862.9	5	24.14	YVHNHNTYTNNENCSSPSWQAQHESR	N2H8F0S0	8-2-0-0-0	-3	0	1	0	0	0	1	15	b1/b3/b5/b7/b8/b9/b10/	y2/y3/y4/y5/y6/y7/y10/y11/	1702.58	3160.32	#N/A	5	4862.91	1	0	0
4	3871	SunS_13_OVCAR3_HILIC_IntactGlycopeptide_F4.3871.3871.3.0.dta	3174.29	3	24.82	SIHENATGDLATSR	N2H8F0S0	8-2-0-0-0	-2	0	4	1	1	1	1	13	b3/b4/b6/	y1/y2/y3/y4/y5/y7/y8/y9/y10/y11/	1702.58	1471.71	747	3	3174.3	1	1	1
4	3943	SunS_13_OVCAR3_HILIC_IntactGlycopeptide_F4.3943.3943.4.0.dta	3898.65	4	25.06	ISSLQTTEKNDTVAGQGER	N2H9F0S0	9-2-0-0-0	-2	0	3	0	1	1	1	9	b2/	y1/y3/y5/y6/y7/y8/y9/y12/	1864.63	2034.01	3457	4	3898.64	1	1	1
4	3944	SunS_13_OVCAR3_HILIC_IntactGlycopeptide_F4.3944.3944.3.0.dta	3898.64	3	25.06	ISSLQTTEKNDTVAGQGER	N2H9F0S0	9-2-0-0-0	-2	0	3	0	1	1	1	6		y1/y3/y5/y6/y7/y8/	1864.63	2034.01	2622	3	3898.64	1	1	1
4	3951	SunS_13_OVCAR3_HILIC_IntactGlycopeptide_F4.3951.3951.4.0.dta	3736.59	4	25.08	ISSLQTTEKNDTVAGQGER	N2H8F0S0	8-2-0-0-0	-1	0	3	0	1	1	1	13	b2/b3/b5/b6/b13/	y1/y3/y5/y6/y7/y8/y9/y12/	1702.58	2034.01	1939	4	3736.59	1	1	1
4	3954	SunS_13_OVCAR3_HILIC_IntactGlycopeptide_F4.3954.3954.3.0.dta	3736.58	3	25.09	ISSLQTTEKNDTVAGQGER	N2H8F0S0	8-2-0-0-0	0	0	4	1	1	1	1	7		y1/y3/y5/y6/y7/y8/y9/	1702.58	2034	3223	3	3736.59	1	1	1
4	4064	SunS_13_OVCAR3_HILIC_IntactGlycopeptide_F4.4064.4064.3.0.dta	2695.17	3	25.44	KLNYTLSQGHR	N2H6F0S0	6-2-0-0-0	0	0	4	1	1	1	1	6	b1/	y1/y3/y5/y7/y9/	1378.48	1316.7	1091	3	2695.18	1	1	1
4	4132	SunS_13_OVCAR3_HILIC_IntactGlycopeptide_F4.4132.4132.3.0.dta	3038.2	3	25.64	EADNHTAFIR	N2H9F0S0	9-2-0-0-0	0	0	4	1	1	1	1	9	b2/b5/	y1/y2/y3/y4/y5/y6/y9/	1864.63	1173.56	34	3	3038.2	1	1	1
4	4156	SunS_13_OVCAR3_HILIC_IntactGlycopeptide_F4.4156.4156.3.0.dta	2876.14	3	25.71	EADNHTAFIR	N2H8F0S0	8-2-0-0-0	-1	0	4	1	1	1	1	7		y1/y2/y3/y4/y5/y6/y9/	1702.58	1173.56	121	3	2876.15	1	1	1
4	4301	SunS_13_OVCAR3_HILIC_IntactGlycopeptide_F4.4301.4301.3.0.dta	3033.15	3	26.17	YHYNGTFEDGK	N2H8F0S0	8-2-0-0-0	-2	0	4	1	1	1	1	15	b1/b2/b3/b6/b8/b9/	y1/y2/y3/y4/y5/y6/y7/y8/y9/	1702.58	1330.57	#N/A	3	3033.15	1	0	0
4	4401	SunS_13_OVCAR3_HILIC_IntactGlycopeptide_F4.4401.4401.4.0.dta	3658.53	4	26.43	DLGPTLANSTHHNVR	N2H10F0S0	10-2-0-0-0	-1	0	4	1	1	1	1	17	b2/b3/b4/b5/b6/b7/b10/	y1/y2/y3/y4/y5/y6/y7/y8/y9/y10/	2026.69	1631.84	2326	4	3658.51	1	1	1
4	4403	SunS_13_OVCAR3_HILIC_IntactGlycopeptide_F4.4403.4403.4.0.dta	3496.46	4	26.44	DLGPTLANSTHHNVR	N2H9F0S0	9-2-0-0-0	-1	0	4	1	1	1	1	12	b2/b5/b6/b7/	y1/y2/y3/y4/y5/y6/y7/y8/	1864.63	1631.82	3458	4	3496.46	1	1	1
4	4423	SunS_13_OVCAR3_HILIC_IntactGlycopeptide_F4.4423.4423.4.0.dta	3334.41	4	26.51	DLGPTLANSTHHNVR	N2H8F0S0	8-2-0-0-0	-1	0	4	1	1	1	1	6	b2/	y1/y3/y4/y5/y6/	1702.58	1631.83	3272	4	3334.41	1	1	1
4	4587	SunS_13_OVCAR3_HILIC_IntactGlycopeptide_F4.4587.4587.3.0.dta	3092.31	3	27.05	EERPLNASALK	N2H9F0S0	9-2-0-0-0	-1	0	4	1	1	1	1	7	b3/b5/b9/b10/	y1/y2/y3/	1864.63	1227.67	1205	3	3092.31	1	1	1
4	4611	SunS_13_OVCAR3_HILIC_IntactGlycopeptide_F4.4611.4611.3.0.dta	3083.29	3	27.14	VNNTLSSQISR	N2H9F0S0	9-2-0-0-0	-1	0	4	1	1	1	1	14	b2/b3/b4/b5/	y1/y2/y3/y4/y5/y6/y7/y8/y9/y10/	1864.63	1218.65	33	3	3083.29	1	1	1
4	4615	SunS_13_OVCAR3_HILIC_IntactGlycopeptide_F4.4615.4615.3.0.dta	2930.25	3	27.15	EERPLNASALK	N2H8F0S0	8-2-0-0-0	-1	0	4	1	1	1	1	8	b3/b5/b9/b10/	y1/y2/y3/y4/	1702.58	1227.66	1553	3	2930.26	1	1	1
4	4639	SunS_13_OVCAR3_HILIC_IntactGlycopeptide_F4.4639.4639.3.0.dta	2921.24	3	27.22	VNNTLSSQISR	N2H8F0S0	8-2-0-0-0	-1	0	4	1	1	1	1	17	b2/b3/b4/b5/b6/b7/b9/	y1/y2/y3/y4/y5/y6/y7/y8/y9/y10/	1702.58	1218.66	88	3	2921.24	1	1	1
4	4727	SunS_13_OVCAR3_HILIC_IntactGlycopeptide_F4.4727.4727.3.0.dta	3345.4	3	27.48	HLLENSTASVSEAER	N2H8F0S0	8-2-0-0-0	-1	0	4	1	1	1	1	22	b1/b2/b3/b4/b5/b6/b8/b12/	y1/y2/y3/y4/y5/y6/y7/y8/y9/y10/y11/y12/y13/y14/	1702.58	1642.82	235	3	3345.4	1	1	1
4	4769	SunS_13_OVCAR3_HILIC_IntactGlycopeptide_F4.4769.4769.3.0.dta	3183.35	3	27.62	HLLENSTASVSEAER	N2H7F0S0	7-2-0-0-0	-1	0	4	1	1	1	1	22	b2/b3/b4/b5/b6/b7/b9/b12/	y1/y2/y3/y4/y5/y6/y7/y8/y9/y10/y11/y12/y13/y14/	1540.53	1642.82	722	3	3183.34	1	1	1
4	5076	SunS_13_OVCAR3_HILIC_IntactGlycopeptide_F4.5076.5076.3.0.dta	2975.29	3	28.44	ALSPNSTISSAPK	N2H8F0S0	8-2-0-0-0	0	0	4	1	1	1	1	11	b2/b3/b11/	y2/y3/y5/y6/y7/y8/y10/y11/	1702.58	1272.7	1443	3	2975.28	1	1	1
4	5144	SunS_13_OVCAR3_HILIC_IntactGlycopeptide_F4.5144.5144.3.0.dta	2813.23	3	28.62	ALSPNSTISSAPK	N2H7F0S0	7-2-0-0-0	0	0	3	1	0	1	1	8	b2/b3/	y2/y5/y6/y7/y10/y11/	1540.53	1272.7	3563	3	2813.22	1	1	1
4	5158	SunS_13_OVCAR3_HILIC_IntactGlycopeptide_F4.5158.5158.3.0.dta	2651.17	3	28.65	ALSPNSTISSAPK	N2H6F0S0	6-2-0-0-0	0	0	4	1	1	1	1	14	b2/b3/b10/b11/	y1/y2/y3/y4/y5/y6/y7/y8/y10/y11/	1378.48	1272.69	1221	3	2651.17	1	1	1
4	5362	SunS_13_OVCAR3_HILIC_IntactGlycopeptide_F4.5362.5362.3.0.dta	2436.07	3	29.21	DNATLQATLHAAR	N2H4F0S0	4-2-0-0-0	-1	0	4	1	1	1	1	10	b3/	y1/y3/y4/y5/y6/y7/y8/y9/y10/	1054.37	1381.7	#N/A	3	2437.08	0	1	0
4	5374	SunS_13_OVCAR3_HILIC_IntactGlycopeptide_F4.5374.5374.3.0.dta	3268.32	3	29.24	NSSVGPLYSGCR	N5H5F1S0	5-5-0-1-0	-1	0	2	1	0	1	0	7		y1/y4/y7/y8/y9/y10/y11/	1971.72	1296.61	2680	3	3268.34	1	1	1
4	5375	SunS_13_OVCAR3_HILIC_IntactGlycopeptide_F4.5375.5375.4.0.dta	3268.34	4	29.24	NSSVGPLYSGCR	N5H5F1S0	5-5-0-1-0	-1	0	2	1	0	1	0	10	b8/	y1/y3/y4/y5/y7/y8/y9/y10/y11/	1971.72	1296.62	2081	4	3268.33	1	1	1
4	5382	SunS_13_OVCAR3_HILIC_IntactGlycopeptide_F4.5382.5382.3.0.dta	3408.41	3	29.26	DNATLQATLHAAR	N2H10F0S0	10-2-0-0-0	-1	0	4	1	1	1	1	12	b3/	y1/y2/y3/y4/y5/y6/y7/y8/y9/y10/y11/	2026.69	1381.72	222	3	3408.42	1	1	1
4	5395	SunS_13_OVCAR3_HILIC_IntactGlycopeptide_F4.5395.5395.3.0.dta	3084.3	3	29.3	DNATLQATLHAAR	N2H8F0S0	8-2-0-0-0	-1	0	4	1	1	1	1	20	b2/b3/b4/b5/b6/b7/b9/b10/	y1/y2/y3/y4/y5/y6/y7/y8/y9/y10/y11/y12/	1702.58	1381.72	186	3	3084.32	1	1	1
4	5397	SunS_13_OVCAR3_HILIC_IntactGlycopeptide_F4.5397.5397.3.0.dta	3246.36	3	29.3	DNATLQATLHAAR	N2H9F0S0	9-2-0-0-0	-1	0	4	1	1	1	1	22	b2/b3/b4/b5/b6/b7/b8/b10/b11/b12/	y1/y2/y3/y4/y5/y6/y7/y8/y9/y10/y11/y12/	1864.63	1381.73	131	3	3246.37	1	1	1
4	5405	SunS_13_OVCAR3_HILIC_IntactGlycopeptide_F4.5405.5405.4.0.dta	3246.37	4	29.33	DNATLQATLHAAR	N2H9F0S0	9-2-0-0-0	-1	0	4	1	1	1	1	16	b2/b3/b4/b6/b7/	y1/y2/y3/y4/y5/y6/y7/y8/y9/y10/y11/	1864.63	1381.73	157	4	3246.36	1	1	1
4	5407	SunS_13_OVCAR3_HILIC_IntactGlycopeptide_F4.5407.5407.4.0.dta	3084.29	4	29.33	DNATLQATLHAAR	N2H8F0S0	8-2-0-0-0	-1	0	4	1	1	1	1	18	b2/b3/b4/b5/b6/b8/	y1/y2/y3/y4/y5/y6/y7/y8/y9/y10/y11/y12/	1702.58	1381.71	73	4	3084.31	1	1	1
4	5411	SunS_13_OVCAR3_HILIC_IntactGlycopeptide_F4.5411.5411.3.0.dta	2760.2	3	29.34	DNATLQATLHAAR	N2H6F0S0	6-2-0-0-0	-1	0	4	1	1	1	1	13	b3/b4/	y1/y2/y3/y4/y5/y6/y7/y8/y9/y10/y11/	1378.48	1381.73	99	3	2760.21	1	1	1
4	5412	SunS_13_OVCAR3_HILIC_IntactGlycopeptide_F4.5412.5412.3.0.dta	2598.15	3	29.34	DNATLQATLHAAR	N2H5F0S0	5-2-0-0-0	-1	0	4	1	1	1	1	14	b2/b3/b4/	y1/y2/y3/y4/y5/y6/y7/y8/y9/y10/y11/	1216.42	1381.72	129	3	2598.15	1	1	1
4	5417	SunS_13_OVCAR3_HILIC_IntactGlycopeptide_F4.5417.5417.3.0.dta	3106.27	3	29.36	NSSVGPLYSGCR	N5H4F1S0	4-5-0-1-0	-2	0	2	1	0	1	0	9	b9/	y1/y3/y4/y5/y7/y8/y9/y10/	1809.67	1296.6	2330	3	3106.28	1	1	1
4	5492	SunS_13_OVCAR3_HILIC_IntactGlycopeptide_F4.5492.5492.3.0.dta	3084.32	3	29.56	DNATLQATLHAAR	N2H8F0S0	8-2-0-0-0	-1	0	4	1	1	1	1	15	b2/b3/b4/	y1/y2/y3/y4/y5/y6/y7/y8/y9/y10/y11/y12/	1702.58	1381.74	135	3	3084.32	1	1	1
4	5495	SunS_13_OVCAR3_HILIC_IntactGlycopeptide_F4.5495.5495.3.0.dta	3337.3	3	29.57	NTSVGPLYSGCR	N2H10F0S0	10-2-0-0-0	-1	0	4	1	1	1	1	9	b2/	y1/y4/y5/y7/y8/y9/y10/y11/	2026.69	1310.62	302	3	3337.32	1	1	1
4	5523	SunS_13_OVCAR3_HILIC_IntactGlycopeptide_F4.5523.5523.4.0.dta	3647.49	4	29.64	NTSVGPLYSGCR	N6H6F1S0	6-6-0-1-0	-2	0	4	1	1	1	1	10	b2/	y1/y3/y4/y5/y7/y8/y9/y10/y11/	2336.85	1310.64	2697	4	3647.49	1	1	1
4	5529	SunS_13_OVCAR3_HILIC_IntactGlycopeptide_F4.5529.5529.3.0.dta	3175.27	3	29.66	NTSVGPLYSGCR	N2H9F0S0	9-2-0-0-0	-1	0	4	1	1	1	1	10	b2/	y1/y3/y4/y5/y7/y8/y9/y10/y11/	1864.63	1310.63	562	3	3175.27	1	1	1
4	5550	SunS_13_OVCAR3_HILIC_IntactGlycopeptide_F4.5550.5550.3.0.dta	2760.21	3	29.72	DNATLQATLHAAR	N2H6F0S0	6-2-0-0-0	-1	0	4	1	1	1	1	13	b3/b4/	y1/y2/y3/y4/y5/y6/y7/y8/y9/y10/y11/	1378.48	1381.73	169	3	2760.21	1	1	1
4	5558	SunS_13_OVCAR3_HILIC_IntactGlycopeptide_F4.5558.5558.4.0.dta	4033.68	4	29.74	HRPTAGAFNHSDLDAELR	N2H10F0S0	10-2-0-0-0	-1	0	2	0	1	0	1	7	b2/	y1/y2/y4/y6/y7/y8/	2026.69	2007	7691	4	4033.67	1	1	1
4	5612	SunS_13_OVCAR3_HILIC_IntactGlycopeptide_F4.5612.5612.4.0.dta	3547.52	4	29.88	HRPTAGAFNHSDLDAELR	N2H7F0S0	7-2-0-0-0	-1	0	2	0	1	0	1	11	b2/b8/b9/	y1/y2/y4/y5/y6/y7/y8/y9/	1540.53	2006.99	4598	4	3547.53	1	1	1
4	5623	SunS_13_OVCAR3_HILIC_IntactGlycopeptide_F4.5623.5623.3.0.dta	2864.19	3	29.91	ANFTEIQK	N4H5F0S1	5-4-1-0-0	-1	0	2	1	0	1	0	10	b3/b5/b6/b7/	y1/y2/y3/y4/y5/y6/	1913.68	950.509	12605	3	2864.19	1	0	0
4	5684	SunS_13_OVCAR3_HILIC_IntactGlycopeptide_F4.5684.5684.3.0.dta	3183.31	3	30.06	IDSTGNVTNELR	N2H9F0S0	9-2-0-0-0	-1	0	4	1	1	1	1	13	b2/b3/b7/b8/	y1/y2/y3/y4/y5/y6/y8/y9/y10/	1864.63	1318.68	678	3	3183.31	1	1	1
4	5700	SunS_13_OVCAR3_HILIC_IntactGlycopeptide_F4.5700.5700.3.0.dta	3407.4	3	30.1	EEAMLYHNQTAELR	N2H8F0S0	8-2-0-0-0	-1	0	4	1	1	1	1	11	b2/b3/b4/b5/b7/	y1/y2/y3/y4/y6/y7/	1702.58	1704.82	#N/A	3	3407.4	1	0	0
4	5710	SunS_13_OVCAR3_HILIC_IntactGlycopeptide_F4.5710.5710.3.0.dta	3021.25	3	30.13	IDSTGNVTNELR	N2H8F0S0	8-2-0-0-0	0	0	4	1	1	1	1	15	b2/b3/b7/b10/	y1/y2/y3/y4/y5/y6/y7/y8/y9/y10/y11/	1702.58	1318.67	627	3	3021.26	1	1	1
4	5837	SunS_13_OVCAR3_HILIC_IntactGlycopeptide_F4.5837.5837.4.0.dta	3377.41	4	30.45	HYENHSAIMLGIK	N2H9F0S0	9-2-0-0-0	-1	0	4	1	1	1	1	7	b2/b12/	y1/y3/y4/y5/y9/	1864.63	1512.77	#N/A	4	3377.42	1	0	0
4	5940	SunS_13_OVCAR3_HILIC_IntactGlycopeptide_F4.5940.5940.3.0.dta	3280.33	3	30.72	WGHNITEFQQR	N2H9F0S0	9-2-0-0-0	0	0	4	1	1	1	1	13	b1/b3/b4/b5/b6/	y1/y2/y3/y4/y5/y6/y7/y8/	1864.63	1415.7	521	3	3280.33	1	1	1
4	5961	SunS_13_OVCAR3_HILIC_IntactGlycopeptide_F4.5961.5961.3.0.dta	3118.28	3	30.79	WGHNITEFQQR	N2H8F0S0	8-2-0-0-0	-1	0	4	1	1	1	1	14	b1/b3/b4/b5/b6/b7/	y1/y2/y3/y4/y5/y6/y7/y8/	1702.58	1415.7	401	3	3118.28	1	1	1
4	6003	SunS_13_OVCAR3_HILIC_IntactGlycopeptide_F4.6003.6003.3.0.dta	2956.23	3	30.92	WGHNITEFQQR	N2H7F0S0	7-2-0-0-0	-1	0	4	1	1	1	1	11	b1/b3/b4/b5/b6/	y1/y3/y4/y5/y6/y7/	1540.53	1415.7	#N/A	3	2957.23	0	1	0
4	6021	SunS_13_OVCAR3_HILIC_IntactGlycopeptide_F4.6021.6021.3.0.dta	2794.17	3	30.96	WGHNITEFQQR	N2H6F0S0	6-2-0-0-0	-1	0	4	1	1	1	1	15	b1/b3/b4/b5/b6/b10/	y1/y2/y3/y4/y5/y6/y7/y8/y10/	1378.48	1415.69	1538	3	2794.18	1	1	1
4	6117	SunS_13_OVCAR3_HILIC_IntactGlycopeptide_F4.6117.6117.3.0.dta	2794.15	3	31.26	WGHNITEFQQR	N2H6F0S0	6-2-0-0-0	-2	0	4	1	1	1	1	8	b1/b3/b6/	y1/y3/y4/y6/y7/	1378.48	1415.67	2920	3	2794.15	1	1	1
4	6129	SunS_13_OVCAR3_HILIC_IntactGlycopeptide_F4.6129.6129.3.0.dta	3029.2	3	31.29	FNLSHLGSK	N2H10F0S0	10-2-0-0-0	-1	0	4	1	1	1	1	13	b2/b3/b5/b6/b7/b8/	y1/y2/y3/y4/y5/y6/y7/	2026.69	1002.52	#N/A	3	3029.21	1	0	0
4	6239	SunS_13_OVCAR3_HILIC_IntactGlycopeptide_F4.6239.6239.3.0.dta	3433.41	3	31.59	GLNLTEDTYKPR	N2H10F0S0	10-2-0-0-0	0	0	4	1	1	1	1	15	b2/b3/b4/b5/b7/	y1/y2/y3/y4/y5/y6/y7/y8/y9/y10/	2026.69	1406.72	91	3	3433.41	1	1	1
4	6268	SunS_13_OVCAR3_HILIC_IntactGlycopeptide_F4.6268.6268.3.0.dta	3271.36	3	31.68	GLNLTEDTYKPR	N2H9F0S0	9-2-0-0-0	-1	0	4	1	1	1	1	13	b2/b3/b4/b7/	y1/y2/y3/y4/y5/y6/y7/y8/y9/	1864.63	1406.72	35	3	3271.35	1	1	1
4	6308	SunS_13_OVCAR3_HILIC_IntactGlycopeptide_F4.6308.6308.3.0.dta	3109.31	3	31.77	GLNLTEDTYKPR	N2H8F0S0	8-2-0-0-0	0	0	4	1	1	1	1	12	b2/b3/b4/b8/	y1/y2/y3/y5/y6/y7/y8/y10/	1702.58	1406.73	202	3	3109.3	1	1	1
4	6376	SunS_13_OVCAR3_HILIC_IntactGlycopeptide_F4.6376.6376.4.0.dta	4860.98	4	31.96	IHVAGETDSSNLNVSEPR	N6H7F2S1	7-6-1-2-0	-2	0	4	1	1	1	1	17	b2/b3/b4/b5/b6/b7/b8/b9/b10/b11/b12/	y1/y2/y3/y4/y5/y11/	2936.06	1924.92	1554	4	4860.98	1	1	1
4	6458	SunS_13_OVCAR3_HILIC_IntactGlycopeptide_F4.6458.6458.3.0.dta	3152.21	3	32.16	GSNYSEILDK	N2H10F0S0	10-2-0-0-0	-1	0	3	1	0	1	1	8	b6/b7/	y1/y2/y3/y4/y6/y7/	2026.69	1125.53	2438	3	3152.22	1	1	1
4	6481	SunS_13_OVCAR3_HILIC_IntactGlycopeptide_F4.6481.6481.3.0.dta	2990.17	3	32.23	GSNYSEILDK	N2H9F0S0	9-2-0-0-0	0	0	3	1	0	1	1	14	b4/b6/b7/b8/b9/	y1/y2/y3/y4/y5/y6/y7/y8/y9/	1864.63	1125.53	1316	3	2990.17	1	1	1
4	6552	SunS_13_OVCAR3_HILIC_IntactGlycopeptide_F4.6552.6552.3.0.dta	2828.11	3	32.4	GSNYSEILDK	N2H8F0S0	8-2-0-0-0	0	0	3	1	0	1	1	16	b3/b4/b5/b6/b7/b8/b9/	y1/y2/y3/y4/y5/y6/y7/y8/y9/	1702.58	1125.53	683	3	2828.11	1	1	1
4	6609	SunS_13_OVCAR3_HILIC_IntactGlycopeptide_F4.6609.6609.3.0.dta	3921.51	3	32.55	KDTCTQECSYFNITK	N2H10F0S0	10-2-0-0-0	-2	0	3	0	1	1	1	7	b1/b2/b6/b7/b13/	y1/y2/	2026.69	1894.82	3788	3	3921.49	1	1	1
4	6633	SunS_13_OVCAR3_HILIC_IntactGlycopeptide_F4.6633.6633.3.0.dta	3759.46	3	32.6	KDTCTQECSYFNITK	N2H9F0S0	9-2-0-0-0	0	0	4	1	1	1	1	25	b1/b2/b3/b4/b5/b6/b7/b8/b9/b10/b11/b12/b13/b14/	y1/y2/y3/y4/y5/y7/y8/y9/y10/y11/y13/	1864.63	1894.82	2459	3	3759.46	1	1	1
4	6635	SunS_13_OVCAR3_HILIC_IntactGlycopeptide_F4.6635.6635.4.0.dta	3759.46	4	32.61	KDTCTQECSYFNITK	N2H9F0S0	9-2-0-0-0	0	0	4	1	1	1	1	26	b1/b2/b3/b4/b5/b6/b7/b8/b9/b10/b11/b12/b13/b14/	y1/y2/y3/y4/y5/y7/y8/y9/y10/y11/y13/y14/	1864.63	1894.83	2392	4	3759.46	1	1	1
4	6639	SunS_13_OVCAR3_HILIC_IntactGlycopeptide_F4.6639.6639.3.0.dta	3597.4	3	32.62	KDTCTQECSYFNITK	N2H8F0S0	8-2-0-0-0	0	0	4	1	1	1	1	23	b1/b2/b3/b4/b5/b6/b7/b8/b9/b10/b11/b12/b13/b14/	y1/y2/y3/y4/y5/y8/y9/y11/y13/	1702.58	1894.82	2385	3	3597.4	1	1	1
4	6640	SunS_13_OVCAR3_HILIC_IntactGlycopeptide_F4.6640.6640.4.0.dta	3597.41	4	32.62	KDTCTQECSYFNITK	N2H8F0S0	8-2-0-0-0	0	0	4	1	1	1	1	24	b1/b2/b3/b4/b5/b6/b7/b8/b9/b10/b11/b12/b13/b14/	y1/y2/y3/y4/y5/y6/y7/y8/y9/y14/	1702.58	1894.83	515	4	3597.4	1	1	1
4	6701	SunS_13_OVCAR3_HILIC_IntactGlycopeptide_F4.6701.6701.3.0.dta	3435.33	3	32.77	KDTCTQECSYFNITK	N2H7F0S0	7-2-0-0-0	0	0	4	1	1	1	1	21	b1/b2/b3/b4/b5/b6/b7/b8/b10/b11/b12/b13/b14/	y1/y2/y3/y4/y5/y6/y7/y8/	1540.53	1894.81	3075	3	3435.35	1	1	1
4	6714	SunS_13_OVCAR3_HILIC_IntactGlycopeptide_F4.6714.6714.3.0.dta	2504	3	32.81	GSNYSEILDK	N2H6F0S0	6-2-0-0-0	0	0	3	1	0	1	1	14	b2/b4/b6/b7/b8/b9/	y1/y2/y3/y4/y5/y6/y7/y8/	1378.48	1125.52	771	3	2504.01	1	1	1
4	6721	SunS_13_OVCAR3_HILIC_IntactGlycopeptide_F4.6721.6721.4.0.dta	3666.69	4	32.82	IAPASNVSHTVVLRPLK	N2H9F0S0	9-2-0-0-0	0	0	4	1	1	1	1	19	b2/b3/b4/b6/b7/b8/b9/b12/	y1/y3/y4/y5/y6/y7/y8/y9/y10/y11/y15/	1864.63	1802.05	4432	4	3666.69	1	1	1
4	6729	SunS_13_OVCAR3_HILIC_IntactGlycopeptide_F4.6729.6729.3.0.dta	3666.69	3	32.84	IAPASNVSHTVVLRPLK	N2H9F0S0	9-2-0-0-0	-1	0	4	1	1	1	1	15	b2/b3/b7/b12/	y1/y3/y4/y5/y6/y7/y8/y9/y10/y11/y15/	1864.63	1802.06	3339	3	3666.69	1	1	1
4	6738	SunS_13_OVCAR3_HILIC_IntactGlycopeptide_F4.6738.6738.3.0.dta	3273.3	3	32.87	KDTCTQECSYFNITK	N2H6F0S0	6-2-0-0-0	-2	0	4	1	1	1	1	17	b1/b2/b3/b6/b7/b8/b9/b10/b11/b12/b13/	y1/y2/y3/y4/y5/y8/	1378.48	1894.82	2614	3	3273.3	1	1	1
4	6748	SunS_13_OVCAR3_HILIC_IntactGlycopeptide_F4.6748.6748.4.0.dta	3504.64	4	32.89	IAPASNVSHTVVLRPLK	N2H8F0S0	8-2-0-0-0	0	0	4	1	1	1	1	15	b2/b3/b7/b9/b12/	y1/y3/y4/y5/y6/y7/y8/y9/y10/y11/	1702.58	1802.06	#N/A	4	3504.63	1	1	1
4	6751	SunS_13_OVCAR3_HILIC_IntactGlycopeptide_F4.6751.6751.3.0.dta	3314.39	3	32.9	KDVNYTQIVVDR	N2H9F0S0	9-2-0-0-0	-1	0	4	1	1	1	1	15	b1/b2/b3/b5/	y1/y2/y3/y4/y5/y6/y7/y8/y9/y10/y11/	1864.63	1449.76	1029	3	3314.39	1	1	1
4	6845	SunS_13_OVCAR3_HILIC_IntactGlycopeptide_F4.6845.6845.5.0.dta	4964.04	5	33.13	VASVININPNTTHSTGSCR	N6H7F2S1	7-6-1-2-0	-3	0	4	1	1	1	1	17	b2/b3/b4/b5/b6/b7/b8/	y1/y2/y4/y5/y6/y7/y8/y9/y11/y13/	2936.06	2027.98	5773	5	4964.04	1	1	1
4	6921	SunS_13_OVCAR3_HILIC_IntactGlycopeptide_F4.6921.6921.4.0.dta	4744.96	4	33.32	VASVININPNTTHSTGSCR	N5H6F3S1	6-5-1-3-0	-3	0	4	1	1	1	1	16	b2/b3/b4/b5/b6/b7/b8/	y1/y3/y4/y5/y6/y7/y8/y9/y11/	2716.98	2027.98	5442	4	4744.96	1	1	1
4	6931	SunS_13_OVCAR3_HILIC_IntactGlycopeptide_F4.6931.6931.5.0.dta	4364.8	5	33.35	GHAHLAALVNHESYNFSHR	N4H5F0S2	5-4-2-0-0	-2	0	3	0	1	1	1	17	b2/b3/b4/b5/b6/b7/b8/b9/b10/b11/b12/b17/	y1/y2/y3/y4/y7/	2204.77	2160.03	10335	5	4364.81	1	1	1
4	6952	SunS_13_OVCAR3_HILIC_IntactGlycopeptide_F4.6952.6952.3.0.dta	4364.81	3	33.4	GHAHLAALVNHESYNFSHR	N4H5F0S2	5-4-2-0-0	-2	0	3	0	1	1	1	14	b2/b3/b4/b5/b6/b7/b8/b9/b10/b12/	y1/y2/y3/y4/	2204.77	2160.04	5702	3	4364.8	1	1	1
4	6985	SunS_13_OVCAR3_HILIC_IntactGlycopeptide_F4.6985.6985.4.0.dta	4452.85	4	33.48	VASVININPNTTHSTGSCR	N5H6F1S1	6-5-1-1-0	-2	0	4	1	1	1	1	15	b2/b3/b4/b5/b6/b7/b8/	y1/y4/y5/y6/y7/y8/y9/y11/	2424.87	2027.98	5115	4	4452.85	1	1	1
4	7013	SunS_13_OVCAR3_HILIC_IntactGlycopeptide_F4.7013.7013.3.0.dta	4452.85	3	33.55	VASVININPNTTHSTGSCR	N5H6F1S1	6-5-1-1-0	-3	0	4	1	1	1	1	13	b2/b3/b5/b6/b7/b8/	y4/y5/y6/y7/y8/y9/y11/	2424.87	2027.99	3781	3	4452.85	1	1	1
4	7053	SunS_13_OVCAR3_HILIC_IntactGlycopeptide_F4.7053.7053.5.0.dta	4364.81	5	33.64	GHAHLAALVNHESYNFSHR	N4H5F0S2	5-4-2-0-0	0	0	2	0	1	0	1	8	b2/b3/b5/b6/b7/b9/	y1/y7/	2204.77	2160.04	7470	5	4364.81	1	1	1
4	7088	SunS_13_OVCAR3_HILIC_IntactGlycopeptide_F4.7088.7088.4.0.dta	4452.86	4	33.74	VASVININPNTTHSTGSCR	N5H6F1S1	6-5-1-1-0	-2	0	3	0	1	1	1	13	b2/b3/b4/b6/b7/b11/	y4/y5/y6/y7/y8/y9/y11/	2424.87	2028	6215	4	4452.85	1	1	1
4	7184	SunS_13_OVCAR3_HILIC_IntactGlycopeptide_F4.7184.7184.4.0.dta	3933.65	4	33.98	IKLDNYSTQELGK	N5H6F1S1	6-5-1-1-0	-1	0	4	1	1	1	1	15	b2/b4/b6/b10/b11/	y1/y3/y4/y5/y6/y7/y8/y9/y10/y11/	2424.87	1508.78	3036	4	3933.65	1	1	1
4	7337	SunS_13_OVCAR3_HILIC_IntactGlycopeptide_F4.7337.7337.3.0.dta	3195.33	3	34.37	EGSLPGNSTISIR	N2H9F0S0	9-2-0-0-0	-1	0	4	1	1	1	1	10	b2/b3/b4/	y1/y2/y3/y4/y5/y6/y9/	1864.63	1330.7	1317	3	3195.32	1	1	1
4	7348	SunS_13_OVCAR3_HILIC_IntactGlycopeptide_F4.7348.7348.3.0.dta	3033.26	3	34.4	EGSLPGNSTISIR	N2H8F0S0	8-2-0-0-0	-1	0	4	1	1	1	1	13	b2/b3/b4/b5/b8/	y1/y2/y3/y4/y5/y6/y9/y11/	1702.58	1330.68	601	3	3033.27	1	1	1
4	7353	SunS_13_OVCAR3_HILIC_IntactGlycopeptide_F4.7353.7353.3.0.dta	2700.13	3	34.41	GHTLTLNFTR	N2H7F0S0	7-2-0-0-0	0	0	4	1	1	1	1	11	b2/b3/b4/b5/b6/b7/b8/	y1/y2/y3/y8/	1540.53	1159.61	261	3	2700.15	1	1	1
4	7411	SunS_13_OVCAR3_HILIC_IntactGlycopeptide_F4.7411.7411.3.0.dta	2871.21	3	34.58	EGSLPGNSTISIR	N2H7F0S0	7-2-0-0-0	-1	0	4	1	1	1	1	10	b2/b3/b4/	y1/y2/y3/y4/y5/y6/y9/	1540.53	1330.69	833	3	2871.22	1	1	1
4	7416	SunS_13_OVCAR3_HILIC_IntactGlycopeptide_F4.7416.7416.3.0.dta	2538.09	3	34.59	GHTLTLNFTR	N2H6F0S0	6-2-0-0-0	0	0	4	1	1	1	1	14	b2/b3/b4/b5/b6/b7/b8/	y1/y2/y3/y4/y5/y6/y8/	1378.48	1159.62	609	3	2538.09	1	1	1
4	7470	SunS_13_OVCAR3_HILIC_IntactGlycopeptide_F4.7470.7470.3.0.dta	2376.05	3	34.74	GHTLTLNFTR	N2H5F0S0	5-2-0-0-0	0	0	4	1	1	1	1	11	b2/b3/b4/b5/b6/	y1/y2/y3/y6/y7/y8/	1216.42	1159.62	614	3	2376.04	1	1	1
4	7481	SunS_13_OVCAR3_HILIC_IntactGlycopeptide_F4.7481.7481.3.0.dta	2742.16	3	34.77	NATALYHVEAFK	N2H6F0S0	6-2-0-0-0	-1	0	4	1	1	1	1	9	b2/b10/b11/	y2/y6/y7/y8/y9/y10/	1378.48	1363.68	#N/A	3	2742.16	1	0	0
4	7497	SunS_13_OVCAR3_HILIC_IntactGlycopeptide_F4.7497.7497.3.0.dta	2709.17	3	34.81	EGSLPGNSTISIR	N2H6F0S0	6-2-0-0-0	0	0	4	1	1	1	1	8	b3/b4/	y1/y2/y3/y4/y6/y9/	1378.48	1330.7	1151	3	2709.17	1	1	1
4	7559	SunS_13_OVCAR3_HILIC_IntactGlycopeptide_F4.7559.7559.3.0.dta	2376.05	3	34.99	GHTLTLNFTR	N2H5F0S0	5-2-0-0-0	0	0	4	1	1	1	1	11	b2/b3/b4/b5/b6/b8/	y1/y2/y3/y7/y8/	1216.42	1159.63	706	3	2376.04	1	1	1
4	7640	SunS_13_OVCAR3_HILIC_IntactGlycopeptide_F4.7640.7640.4.0.dta	3757.56	4	35.25	GQTEIQVNCPPAVTENK	N3H6F0S1	6-3-1-0-0	0	0	4	1	1	1	1	22	b3/b4/b5/b6/b7/b8/b9/b12/b13/	y1/y2/y3/y4/y5/y7/y8/y9/y10/y11/y12/y13/y15/	1872.65	1884.91	3412	4	3757.56	1	1	1
4	7661	SunS_13_OVCAR3_HILIC_IntactGlycopeptide_F4.7661.7661.3.0.dta	3757.54	3	35.3	GQTEIQVNCPPAVTENK	N3H6F0S1	6-3-1-0-0	-1	0	4	1	1	1	1	20	b3/b4/b5/b6/b7/b8/b9/b10/b13/	y1/y2/y4/y5/y7/y8/y9/y10/y11/y12/y13/	1872.65	1884.89	2199	3	3757.55	1	1	1
4	7681	SunS_13_OVCAR3_HILIC_IntactGlycopeptide_F4.7681.7681.5.0.dta	5774.51	5	35.35	VVRPDSELGERPPEDNQSFQYDHEAFLGKEDSK	N5H4F2S0	4-5-0-2-0	0	0	1	0	0	0	1	15	b3/b5/b7/b10/b15/	y1/y2/y3/y4/y6/y7/y8/y9/y10/y11/	1955.72	3818.79	#N/A	5	5775.51	0	1	0
4	7697	SunS_13_OVCAR3_HILIC_IntactGlycopeptide_F4.7697.7697.5.0.dta	5571.41	5	35.39	VVRPDSELGERPPEDNQSFQYDHEAFLGKEDSK	N4H4F2S0	4-4-0-2-0	-2	0	1	0	0	0	1	16	b3/b5/b7/b10/b15/	y1/y2/y3/y4/y5/y6/y7/y8/y9/y10/y11/	1752.64	3818.76	#N/A	5	5572.42	0	1	0
4	7711	SunS_13_OVCAR3_HILIC_IntactGlycopeptide_F4.7711.7711.3.0.dta	3673.56	3	35.42	QAIHVGNQTFNDGTIVEK	N2H8F0S0	8-2-0-0-0	-2	0	2	0	1	0	1	7	b4/b5/	y1/y2/y3/y4/y6/	1702.58	1970.98	2974	3	3673.56	1	1	1
4	7718	SunS_13_OVCAR3_HILIC_IntactGlycopeptide_F4.7718.7718.4.0.dta	5197.27	4	35.44	VVRPDSELGERPPEDNQSFQYDHEAFLGKEDSK	N2H6F0S0	6-2-0-0-0	-3	0	1	0	0	0	1	16	b3/b5/b7/b10/	y1/y2/y3/y4/y5/y6/y7/y8/y9/y10/y11/y12/	1378.48	3818.79	4133	4	5197.25	1	1	1
4	7720	SunS_13_OVCAR3_HILIC_IntactGlycopeptide_F4.7720.7720.4.0.dta	3136.29	4	35.45	NTSVGLLYSGCR	N5H4F1S0	4-5-0-1-0	-1	0	2	1	0	1	0	11	b2/	y1/y3/y4/y5/y6/y7/y8/y9/y10/y11/	1809.67	1326.63	1830	4	3136.29	1	1	1
4	7734	SunS_13_OVCAR3_HILIC_IntactGlycopeptide_F4.7734.7734.5.0.dta	5263.31	5	35.49	VVRPDSELGERPPEDNQSFQYDHEAFLGKEDSK	N4H3F1S0	3-4-0-1-0	-2	0	1	0	0	0	1	22	b2/b3/b5/b7/b9/b10/b11/b15/	y1/y2/y3/y4/y5/y6/y7/y8/y9/y10/y11/y12/y13/y14/	1444.53	3818.78	4462	5	5263.31	1	1	1
4	7736	SunS_13_OVCAR3_HILIC_IntactGlycopeptide_F4.7736.7736.6.0.dta	5466.41	6	35.49	VVRPDSELGERPPEDNQSFQYDHEAFLGKEDSK	N5H3F1S0	3-5-0-1-0	-3	0	1	0	0	0	1	23	b2/b3/b5/b7/b8/b9/b10/b11/b15/	y1/y2/y3/y4/y5/y6/y7/y8/y9/y10/y11/y12/y13/y14/	1647.61	3818.79	3823	6	5466.39	1	1	1
4	7739	SunS_13_OVCAR3_HILIC_IntactGlycopeptide_F4.7739.7739.4.0.dta	5263.31	4	35.5	VVRPDSELGERPPEDNQSFQYDHEAFLGKEDSK	N4H3F1S0	3-4-0-1-0	-3	0	1	0	0	0	1	18	b3/b5/b7/b10/b14/b15/	y1/y2/y3/y4/y5/y6/y7/y8/y9/y10/y11/y12/	1444.53	3818.78	3685	4	5263.32	1	1	1
4	7740	SunS_13_OVCAR3_HILIC_IntactGlycopeptide_F4.7740.7740.4.0.dta	5466.36	4	35.5	VVRPDSELGERPPEDNQSFQYDHEAFLGKEDSK	N5H3F1S0	3-5-0-1-0	-2	0	1	0	0	0	1	15	b3/b5/b7/b10/b12/b15/	y2/y4/y5/y6/y7/y8/y9/y11/y12/	1647.61	3818.75	3837	4	5466.39	1	1	1
4	7749	SunS_13_OVCAR3_HILIC_IntactGlycopeptide_F4.7749.7749.4.0.dta	3741.55	4	35.53	GQTEIQVNCPPAVTENK	N3H5F1S1	5-3-1-1-0	-1	0	2	0	0	1	1	7	b3/b4/b5/b7/b9/	y8/y10/	1856.66	1884.9	4829	4	3741.55	1	1	1
4	7773	SunS_13_OVCAR3_HILIC_IntactGlycopeptide_F4.7773.7773.3.0.dta	3349.47	3	35.59	QAIHVGNQTFNDGTIVEK	N2H6F0S0	6-2-0-0-0	0	0	3	0	1	1	1	20	b2/b3/b4/b5/b6/b7/	y1/y2/y3/y4/y5/y6/y7/y8/y9/y10/y11/y13/y14/y15/	1378.48	1970.99	973	3	3349.46	1	1	1
4	7846	SunS_13_OVCAR3_HILIC_IntactGlycopeptide_F4.7846.7846.4.0.dta	3187.41	4	35.78	QAIHVGNQTFNDGTIVEK	N2H5F0S0	5-2-0-0-0	-1	0	2	0	1	0	1	13	b2/b3/b4/b5/	y1/y2/y3/y4/y6/y7/y8/y9/y10/	1216.42	1970.99	3271	4	3187.41	1	1	1
4	7864	SunS_13_OVCAR3_HILIC_IntactGlycopeptide_F4.7864.7864.3.0.dta	3333.45	3	35.83	QAIHVGNQTFNDGTIVEK	N2H5F1S0	5-2-0-1-0	-1	0	3	0	1	1	1	16	b2/b3/b4/b5/b6/	y1/y2/y3/y4/y6/y7/y8/y9/y10/y13/y14/	1362.48	1970.97	2970	3	3333.46	1	1	1
4	7946	SunS_13_OVCAR3_HILIC_IntactGlycopeptide_F4.7946.7946.3.0.dta	3061.24	3	36.04	NSSLCALCIGSEK	N4H5F0S0	5-4-0-0-0	-1	0	2	1	0	1	0	13	b4/b7/	y1/y3/y4/y5/y6/y7/y8/y9/y10/y11/y12/	1622.58	1438.66	526	3	3061.24	1	1	1
4	8089	SunS_13_OVCAR3_HILIC_IntactGlycopeptide_F4.8089.8089.3.0.dta	2761.08	3	36.39	GYNVTYWR	N2H8F0S0	8-2-0-0-0	-1	0	3	1	0	1	1	9	b2/b3/b4/	y1/y2/y3/y4/y5/y6/	1702.58	1058.5	1287	3	2761.08	1	1	1
4	8216	SunS_13_OVCAR3_HILIC_IntactGlycopeptide_F4.8216.8216.3.0.dta	3380.4	3	36.71	IVDVNLTSEGK	N4H5F2S1	5-4-1-2-0	-1	0	2	1	0	1	0	14	b2/b3/b4/b5/b6/b7/b8/b9/	y4/y5/y6/y7/y8/y10/	2205.79	1174.61	2572	3	3380.41	1	1	1
4	8280	SunS_13_OVCAR3_HILIC_IntactGlycopeptide_F4.8280.8280.3.0.dta	3234.37	3	36.87	IVDVNLTSEGK	N4H5F1S1	5-4-1-1-0	0	0	2	1	0	1	0	8	b3/b6/b9/	y4/y5/y6/y7/y8/	2059.73	1174.63	2880	3	3234.36	1	1	1
4	8591	SunS_13_OVCAR3_HILIC_IntactGlycopeptide_F4.8591.8591.4.0.dta	4450.92	4	37.7	HIWSLEISNKPNVSEPEEPK	N5H5F2S0	5-5-0-2-0	-2	0	2	0	1	0	1	9	b2/b3/b6/b7/b10/	y2/y5/y6/y7/	2117.78	2333.15	11508	4	4450.94	1	0	0
4	8661	SunS_13_OVCAR3_HILIC_IntactGlycopeptide_F4.8661.8661.4.0.dta	4304.87	4	37.87	HIWSLEISNKPNVSEPEEPK	N5H5F1S0	5-5-0-1-0	-2	0	2	0	1	0	1	9	b2/b5/b6/b7/b10/	y2/y5/y6/y7/	1971.72	2333.15	#N/A	4	4304.88	1	0	0
4	8713	SunS_13_OVCAR3_HILIC_IntactGlycopeptide_F4.8713.8713.3.0.dta	3690.53	3	38.02	GELNTSIFSSRPIDK	N2H10F0S0	10-2-0-0-0	0	0	4	1	1	1	1	9	b2/b5/b9/b10/	y1/y4/y7/y8/y10/	2026.69	1663.84	2087	3	3690.54	1	1	1
4	8714	SunS_13_OVCAR3_HILIC_IntactGlycopeptide_F4.8714.8714.3.0.dta	3528.5	3	38.02	GELNTSIFSSRPIDK	N2H9F0S0	9-2-0-0-0	-2	0	4	1	1	1	1	25	b2/b3/b4/b5/b6/b8/b9/b10/b11/b13/b14/	y1/y2/y3/y4/y5/y6/y7/y8/y9/y10/y11/y12/y13/y14/	1864.63	1663.86	3062	3	3528.49	1	1	1
4	8730	SunS_13_OVCAR3_HILIC_IntactGlycopeptide_F4.8730.8730.3.0.dta	3042.33	3	38.07	GELNTSIFSSRPIDK	N2H6F0S0	6-2-0-0-0	0	0	4	1	1	1	1	8	b9/b10/	y1/y4/y6/y7/y8/y11/	1378.48	1663.86	2231	3	3042.33	1	1	1
4	8758	SunS_13_OVCAR3_HILIC_IntactGlycopeptide_F4.8758.8758.3.0.dta	2880.27	3	38.14	GELNTSIFSSRPIDK	N2H5F0S0	5-2-0-0-0	-1	0	4	1	1	1	1	9	b9/b10/	y1/y2/y4/y7/y8/y9/y10/	1216.42	1663.84	3853	3	2880.28	1	1	1
4	8759	SunS_13_OVCAR3_HILIC_IntactGlycopeptide_F4.8759.8759.3.0.dta	3366.44	3	38.14	GELNTSIFSSRPIDK	N2H8F0S0	8-2-0-0-0	0	0	4	1	1	1	1	24	b2/b3/b4/b5/b6/b8/b9/b10/b11/b13/b14/	y1/y2/y4/y5/y6/y7/y8/y9/y10/y11/y12/y13/y14/	1702.58	1663.85	1294	3	3366.44	1	1	1
4	8760	SunS_13_OVCAR3_HILIC_IntactGlycopeptide_F4.8760.8760.3.0.dta	3267.39	3	38.15	YHIIVQLGNMSK	N2H9F0S0	9-2-0-0-0	0	0	4	1	1	1	1	18	b2/b3/b4/b5/b6/b7/b8/b9/b10/	y1/y2/y3/y5/y6/y7/y8/y9/y10/	1864.63	1402.75	#N/A	3	3267.38	1	0	0
4	9063	SunS_13_OVCAR3_HILIC_IntactGlycopeptide_F4.9063.9063.3.0.dta	4139.68	3	38.93	HLYTTTGGETDFTNVTSLR	N2H10F0S0	10-2-0-0-0	-2	0	4	1	1	1	1	20	b1/b2/b3/b4/b5/b6/b7/b8/b9/b10/b11/b12/	y1/y2/y3/y4/y5/y10/y13/y17/	2026.69	2112.99	2457	3	4139.69	1	1	1
4	9065	SunS_13_OVCAR3_HILIC_IntactGlycopeptide_F4.9065.9065.4.0.dta	4139.69	4	38.93	HLYTTTGGETDFTNVTSLR	N2H10F0S0	10-2-0-0-0	-2	0	3	0	1	1	1	20	b2/b3/b4/b5/b6/b7/b8/b9/b10/b11/b12/b13/	y1/y2/y3/y4/y5/y6/y12/y13/	2026.69	2113	2436	4	4139.68	1	1	1
4	9123	SunS_13_OVCAR3_HILIC_IntactGlycopeptide_F4.9123.9123.3.0.dta	3977.63	3	39.08	HLYTTTGGETDFTNVTSLR	N2H9F0S0	9-2-0-0-0	-2	0	4	1	1	1	1	24	b1/b2/b3/b4/b5/b6/b7/b8/b9/b10/b11/b12/b15/	y1/y2/y3/y4/y5/y6/y8/y13/y14/y16/y17/	1864.63	2112.99	2054	3	3977.63	1	1	1
4	9466	SunS_13_OVCAR3_HILIC_IntactGlycopeptide_F4.9466.9466.3.0.dta	3373.42	3	39.95	VVLGANGTYSCLVR	N2H9F0S0	9-2-0-0-0	-1	0	4	1	1	1	1	6	b2/	y1/y5/y6/y8/y12/	1864.63	1508.78	2823	3	3373.41	1	1	1
4	9517	SunS_13_OVCAR3_HILIC_IntactGlycopeptide_F4.9517.9517.3.0.dta	2909.21	3	40.08	FNISLQK	N4H5F1S1	5-4-1-1-0	-1	0	2	1	0	1	0	10	b2/b3/b4/b5/b6/	y1/y2/y3/y4/y5/	2059.73	849.48	4978	3	2909.21	1	0	0
4	9526	SunS_13_OVCAR3_HILIC_IntactGlycopeptide_F4.9526.9526.3.0.dta	3139.32	3	40.1	EVIDTNLTTLR	N2H9F0S0	9-2-0-0-0	-1	0	4	1	1	1	1	13	b2/b3/b6/b7/	y1/y2/y3/y4/y5/y6/y7/y8/y9/	1864.63	1274.69	441	3	3139.32	1	1	1
4	9537	SunS_13_OVCAR3_HILIC_IntactGlycopeptide_F4.9537.9537.4.0.dta	3063.34	4	40.13	SSCGKENTSDPSLVIAFGR	N2H3F1S0	3-2-0-1-0	-1	0	3	1	1	0	1	27	b2/b3/b4/b5/b6/b7/b8/b9/b10/b12/b13/b14/b15/	y1/y2/y3/y4/y5/y6/y7/y8/y9/y10/y11/y12/y13/y14/	1038.38	2024.96	165	4	3063.34	1	1	1
4	9566	SunS_13_OVCAR3_HILIC_IntactGlycopeptide_F4.9566.9566.3.0.dta	3063.34	3	40.2	SSCGKENTSDPSLVIAFGR	N2H3F1S0	3-2-0-1-0	0	0	4	1	1	1	1	31	b2/b3/b4/b5/b6/b7/b8/b9/b10/b13/b14/b15/b16/b17/b18/	y1/y2/y3/y4/y5/y6/y7/y8/y9/y10/y11/y12/y13/y14/y16/y17/	1038.38	2024.97	111	3	3063.34	1	1	1
4	9567	SunS_13_OVCAR3_HILIC_IntactGlycopeptide_F4.9567.9567.3.0.dta	2977.27	3	40.2	EVIDTNLTTLR	N2H8F0S0	8-2-0-0-0	-1	0	3	1	0	1	1	16	b2/b3/b4/b5/b6/b7/b8/	y1/y2/y3/y4/y5/y6/y7/y8/y9/	1702.58	1274.69	511	3	2977.27	1	1	1
4	9600	SunS_13_OVCAR3_HILIC_IntactGlycopeptide_F4.9600.9600.3.0.dta	2966.23	3	40.29	FNISLQK	N5H5F0S1	5-5-1-0-0	-1	0	2	1	0	1	0	8	b2/b3/b5/b6/	y2/y3/y4/y5/	2116.76	849.472	4192	3	2966.24	1	0	0
4	9642	SunS_13_OVCAR3_HILIC_IntactGlycopeptide_F4.9642.9642.3.0.dta	3063.32	3	40.39	SSCGKENTSDPSLVIAFGR	N2H3F1S0	3-2-0-1-0	-5	0	2	0	1	0	1	9	b6/	y1/y2/y3/y4/y5/y6/y9/y11/	1038.38	2024.95	#N/A	2	2044.9	0	1	0
4	9643	SunS_13_OVCAR3_HILIC_IntactGlycopeptide_F4.9643.9643.3.0.dta	2763.15	3	40.39	FNISLQK	N4H5F0S1	5-4-1-0-0	0	0	2	1	0	1	0	9	b2/b3/b5/b6/	y1/y2/y3/y4/y5/	1913.68	849.473	#N/A	3	2763.15	1	0	0
4	9661	SunS_13_OVCAR3_HILIC_IntactGlycopeptide_F4.9661.9661.3.0.dta	3352.34	3	40.43	NSSLCALCIGSEK	N4H5F0S1	5-4-1-0-0	-1	0	3	1	1	1	0	22	b2/b3/b4/b5/b6/b7/b8/b9/b10/b11/b12/	y1/y3/y4/y5/y6/y7/y8/y9/y10/y11/y12/	1913.68	1438.66	1515	3	3352.34	1	1	1
4	9662	SunS_13_OVCAR3_HILIC_IntactGlycopeptide_F4.9662.9662.4.0.dta	3352.34	4	40.44	NSSLCALCIGSEK	N4H5F0S1	5-4-1-0-0	-1	0	3	1	1	1	0	19	b2/b4/b6/b7/b8/b9/b10/	y1/y2/y3/y4/y5/y6/y7/y8/y9/y10/y11/y12/	1913.68	1438.66	2801	4	3352.34	1	1	1
4	9671	SunS_13_OVCAR3_HILIC_IntactGlycopeptide_F4.9671.9671.3.0.dta	2815.21	3	40.46	EVIDTNLTTLR	N2H7F0S0	7-2-0-0-0	0	0	3	1	0	1	1	10	b2/b3/	y1/y2/y3/y4/y5/y7/y8/y9/	1540.53	1274.69	831	3	2815.22	1	1	1
4	9786	SunS_13_OVCAR3_HILIC_IntactGlycopeptide_F4.9786.9786.3.0.dta	3352.34	3	40.74	NSSLCALCIGSEK	N4H5F0S1	5-4-1-0-0	-1	0	2	1	0	1	0	14	b2/b4/b6/b7/	y1/y4/y5/y6/y7/y8/y9/y10/y11/y12/	1913.68	1438.66	1484	3	3352.34	1	1	1
4	9837	SunS_13_OVCAR3_HILIC_IntactGlycopeptide_F4.9837.9837.4.0.dta	3930.64	4	40.87	DYYIISTSNGSLEGLDNQEGGVCQTR	N2H4F0S0	4-2-0-0-0	0	0	1	0	1	0	0	7	b8/b10/b11/b14/	y1/y8/y15/	1054.37	2876.27	5680	4	3931.63	0	1	0
4	9897	SunS_13_OVCAR3_HILIC_IntactGlycopeptide_F4.9897.9897.3.0.dta	3352.34	3	41.01	NSSLCALCIGSEK	N4H5F0S1	5-4-1-0-0	-2	0	2	1	0	1	0	14	b2/b4/b7/b9/	y1/y4/y5/y6/y7/y8/y9/y10/y11/y12/	1913.68	1438.66	2708	3	3352.33	1	1	1
4	9955	SunS_13_OVCAR3_HILIC_IntactGlycopeptide_F4.9955.9955.3.0.dta	2127.9	3	41.15	NGSLFAFR	N2H5F0S0	5-2-0-0-0	0	0	2	1	0	1	0	7	b2/	y1/y2/y3/y4/y5/y7/	1216.42	911.472	632	3	2127.89	1	1	1
4	9970	SunS_13_OVCAR3_HILIC_IntactGlycopeptide_F4.9970.9970.3.0.dta	3372.38	3	41.2	AVGNSTFAIACLQR	N2H9F0S0	9-2-0-0-0	-2	0	4	1	1	1	1	21	b2/b3/b4/b5/b6/b7/b8/b9/b10/	y1/y2/y3/y4/y5/y6/y7/y8/y9/y10/y11/y12/	1864.63	1507.75	158	3	3372.39	1	1	1
4	9989	SunS_13_OVCAR3_HILIC_IntactGlycopeptide_F4.9989.9989.4.0.dta	3352.33	4	41.25	NSSLCALCIGSEK	N4H5F0S1	5-4-1-0-0	-1	0	2	1	0	1	0	6		y1/y4/y6/y8/y9/y10/	1913.68	1438.65	3091	4	3352.34	1	1	1
4	10008	SunS_13_OVCAR3_HILIC_IntactGlycopeptide_F4.10008.10008.3.0.dta	3210.34	3	41.3	AVGNSTFAIACLQR	N2H8F0S0	8-2-0-0-0	-1	0	4	1	1	1	1	21	b2/b3/b4/b5/b6/b7/b8/b9/b10/	y1/y2/y3/y4/y5/y6/y7/y8/y9/y10/y11/y12/	1702.58	1507.76	41	3	3210.34	1	1	1
4	10241	SunS_13_OVCAR3_HILIC_IntactGlycopeptide_F4.10241.10241.3.0.dta	2797.13	3	41.92	DIYTFDGALNK	N2H7F0S0	7-2-0-0-0	0	0	2	1	0	1	0	13	b2/b3/b4/b5/b8/	y1/y2/y3/y5/y6/y7/y8/y9/	1540.53	1256.6	1465	3	2797.14	1	1	1
4	10248	SunS_13_OVCAR3_HILIC_IntactGlycopeptide_F4.10248.10248.4.0.dta	4413.77	4	41.94	HNNDTQHIWESDSNEFSVIADPR	N2H8F0S0	8-2-0-0-0	0	0	2	0	1	0	1	21	b2/b3/b5/b7/b8/b9/	y1/y2/y3/y4/y5/y6/y7/y8/y9/y10/y11/y12/y13/y14/y15/	1702.58	2711.19	#N/A	4	4413.78	1	1	1
4	10276	SunS_13_OVCAR3_HILIC_IntactGlycopeptide_F4.10276.10276.4.0.dta	4575.81	4	42.01	HNNDTQHIWESDSNEFSVIADPR	N2H9F0S0	9-2-0-0-0	-2	0	2	0	1	0	1	28	b2/b3/b4/b5/b6/b7/b8/b9/b10/b12/b21/	y1/y2/y3/y4/y5/y6/y7/y8/y9/y10/y11/y12/y13/y14/y15/y16/y19/	1864.63	2711.18	#N/A	4	4575.83	1	1	1
4	10278	SunS_13_OVCAR3_HILIC_IntactGlycopeptide_F4.10278.10278.3.0.dta	4413.78	3	42.01	HNNDTQHIWESDSNEFSVIADPR	N2H8F0S0	8-2-0-0-0	-2	0	2	0	1	0	1	28	b2/b3/b4/b5/b6/b7/b8/b9/b10/b21/	y1/y2/y3/y4/y5/y6/y7/y8/y9/y10/y11/y12/y13/y14/y15/y16/y17/y19/	1702.58	2711.2	#N/A	3	4413.77	1	1	1
4	10279	SunS_13_OVCAR3_HILIC_IntactGlycopeptide_F4.10279.10279.5.0.dta	4413.76	5	42.02	HNNDTQHIWESDSNEFSVIADPR	N2H8F0S0	8-2-0-0-0	-2	0	2	0	1	0	1	24	b2/b3/b4/b5/b6/b7/b8/b9/b10/	y1/y2/y3/y4/y5/y6/y7/y8/y9/y11/y12/y13/y14/y15/y16/	1702.58	2711.18	#N/A	5	4413.78	1	1	1
4	10298	SunS_13_OVCAR3_HILIC_IntactGlycopeptide_F4.10298.10298.3.0.dta	4575.83	3	42.06	HNNDTQHIWESDSNEFSVIADPR	N2H9F0S0	9-2-0-0-0	-2	0	2	0	1	0	1	28	b2/b3/b4/b5/b6/b7/b8/b9/b10/b21/	y1/y2/y3/y4/y5/y6/y7/y8/y9/y10/y11/y12/y13/y14/y15/y16/y17/y19/	1864.63	2711.19	#N/A	3	4575.83	1	1	1
4	10299	SunS_13_OVCAR3_HILIC_IntactGlycopeptide_F4.10299.10299.5.0.dta	4575.82	5	42.06	HNNDTQHIWESDSNEFSVIADPR	N2H9F0S0	9-2-0-0-0	-2	0	2	0	1	0	1	23	b2/b3/b4/b5/b7/b8/b9/b10/	y1/y2/y3/y4/y5/y6/y7/y8/y9/y10/y11/y12/y13/y14/y15/	1864.63	2711.19	#N/A	5	4575.82	1	1	1
4	10307	SunS_13_OVCAR3_HILIC_IntactGlycopeptide_F4.10307.10307.5.0.dta	4251.72	5	42.08	HNNDTQHIWESDSNEFSVIADPR	N2H7F0S0	7-2-0-0-0	-1	0	1	0	0	0	1	9	b3/	y1/y2/y3/y4/y5/y6/y7/y8/	1540.53	2711.19	1249	5	4251.72	1	1	1
4	10321	SunS_13_OVCAR3_HILIC_IntactGlycopeptide_F4.10321.10321.4.0.dta	4251.71	4	42.12	HNNDTQHIWESDSNEFSVIADPR	N2H7F0S0	7-2-0-0-0	0	0	2	0	1	0	1	26	b2/b3/b4/b5/b6/b7/b8/b9/b10/b21/	y1/y2/y3/y4/y5/y6/y7/y8/y9/y10/y11/y12/y13/y14/y15/y16/	1540.53	2711.18	#N/A	4	4251.73	1	1	1
4	10329	SunS_13_OVCAR3_HILIC_IntactGlycopeptide_F4.10329.10329.3.0.dta	4251.7	3	42.13	HNNDTQHIWESDSNEFSVIADPR	N2H7F0S0	7-2-0-0-0	-2	0	2	0	1	0	1	26	b2/b3/b4/b6/b7/b8/b9/b10/b21/	y1/y2/y3/y4/y5/y6/y7/y8/y9/y10/y11/y12/y13/y14/y15/y16/y17/	1540.53	2711.17	#N/A	3	4251.72	1	1	1
4	10330	SunS_13_OVCAR3_HILIC_IntactGlycopeptide_F4.10330.10330.4.0.dta	4089.68	4	42.14	HNNDTQHIWESDSNEFSVIADPR	N2H6F0S0	6-2-0-0-0	-1	0	1	0	0	0	1	12	b3/b5/	y1/y2/y3/y4/y5/y6/y7/y8/y11/y12/	1378.48	2711.2	1800	4	4089.67	1	1	1
4	10337	SunS_13_OVCAR3_HILIC_IntactGlycopeptide_F4.10337.10337.4.0.dta	3927.62	4	42.15	HNNDTQHIWESDSNEFSVIADPR	N2H5F0S0	5-2-0-0-0	-1	0	1	0	0	0	1	11	b2/b3/b5/	y1/y2/y3/y4/y5/y6/y7/y8/	1216.42	2711.2	1181	4	3927.62	1	1	1
4	10341	SunS_13_OVCAR3_HILIC_IntactGlycopeptide_F4.10341.10341.3.0.dta	3172.26	3	42.16	NELMLNSSLMR	N2H9F0S0	9-2-0-0-0	-1	0	2	1	0	1	0	7	b2/b3/b7/	y1/y2/y4/y5/	1864.63	1307.63	#N/A	3	3173.28	0	1	0
4	10356	SunS_13_OVCAR3_HILIC_IntactGlycopeptide_F4.10356.10356.4.0.dta	4413.76	4	42.2	HNNDTQHIWESDSNEFSVIADPR	N2H8F0S0	8-2-0-0-0	-2	0	2	0	1	0	1	28	b2/b3/b4/b5/b6/b7/b8/b9/b10/b21/	y1/y2/y3/y4/y5/y6/y7/y8/y9/y10/y11/y12/y13/y14/y15/y16/y17/y19/	1702.58	2711.18	#N/A	4	4413.78	1	1	1
4	10364	SunS_13_OVCAR3_HILIC_IntactGlycopeptide_F4.10364.10364.5.0.dta	4089.68	5	42.22	HNNDTQHIWESDSNEFSVIADPR	N2H6F0S0	6-2-0-0-0	-2	0	1	0	0	0	1	11	b3/b6/b8/	y1/y2/y3/y4/y5/y6/y7/y8/	1378.48	2711.21	#N/A	5	4089.67	1	1	1
4	10367	SunS_13_OVCAR3_HILIC_IntactGlycopeptide_F4.10367.10367.3.0.dta	4089.66	3	42.23	HNNDTQHIWESDSNEFSVIADPR	N2H6F0S0	6-2-0-0-0	0	0	2	0	1	0	1	27	b2/b3/b4/b5/b6/b7/b8/b9/b10/b21/	y1/y2/y3/y4/y5/y6/y7/y8/y9/y10/y11/y12/y13/y14/y15/y16/y17/	1378.48	2711.18	#N/A	3	4089.67	1	1	1
4	10377	SunS_13_OVCAR3_HILIC_IntactGlycopeptide_F4.10377.10377.4.0.dta	4462.83	4	42.25	HNNDTQHIWESDSNEFSVIADPR	N4H4F0S1	4-4-1-0-0	-3	0	2	0	1	0	1	9	b3/	y1/y2/y4/y5/y6/y7/y8/y14/	1751.62	2711.2	2853	4	4463.82	0	1	0
4	10387	SunS_13_OVCAR3_HILIC_IntactGlycopeptide_F4.10387.10387.3.0.dta	4413.78	3	42.28	HNNDTQHIWESDSNEFSVIADPR	N2H8F0S0	8-2-0-0-0	-2	0	2	0	1	0	1	29	b2/b3/b4/b5/b6/b7/b8/b9/b10/b12/b21/	y1/y2/y3/y4/y5/y6/y7/y8/y9/y10/y11/y12/y13/y14/y15/y16/y17/y19/	1702.58	2711.2	#N/A	3	4413.77	1	1	1
4	10388	SunS_13_OVCAR3_HILIC_IntactGlycopeptide_F4.10388.10388.5.0.dta	4413.76	5	42.28	HNNDTQHIWESDSNEFSVIADPR	N2H8F0S0	8-2-0-0-0	-2	0	2	0	1	0	1	21	b2/b3/b5/b8/b9/b10/	y1/y2/y3/y4/y5/y6/y7/y8/y9/y10/y11/y12/y13/y14/y15/	1702.58	2711.18	#N/A	5	4413.77	1	1	1
4	10390	SunS_13_OVCAR3_HILIC_IntactGlycopeptide_F4.10390.10390.4.0.dta	4575.81	4	42.29	HNNDTQHIWESDSNEFSVIADPR	N2H9F0S0	9-2-0-0-0	-2	0	2	0	1	0	1	21	b2/b3/b5/b7/b8/b21/	y1/y2/y3/y4/y5/y6/y7/y8/y9/y11/y12/y13/y14/y15/y16/	1864.63	2711.18	#N/A	4	4575.82	1	1	1
4	10403	SunS_13_OVCAR3_HILIC_IntactGlycopeptide_F4.10403.10403.4.0.dta	4520.87	4	42.32	HNNDTQHIWESDSNEFSVIADPR	N5H4F1S0	4-5-0-1-0	-2	0	1	0	0	0	1	6	b3/	y1/y2/y7/y11/y15/	1809.67	2711.21	3513	4	4520.84	1	1	1
4	10407	SunS_13_OVCAR3_HILIC_IntactGlycopeptide_F4.10407.10407.3.0.dta	4575.82	3	42.33	HNNDTQHIWESDSNEFSVIADPR	N2H9F0S0	9-2-0-0-0	-2	0	1	0	0	0	1	11	b2/b3/b21/	y1/y2/y5/y7/y8/y11/y14/y15/	1864.63	2711.18	2753	3	4575.82	1	1	1
4	10408	SunS_13_OVCAR3_HILIC_IntactGlycopeptide_F4.10408.10408.5.0.dta	4575.84	5	42.33	HNNDTQHIWESDSNEFSVIADPR	N2H9F0S0	9-2-0-0-0	-2	0	1	0	0	0	1	10	b3/b5/	y1/y2/y3/y4/y5/y6/y7/y8/	1864.63	2711.21	1639	5	4575.82	1	1	1
4	10410	SunS_13_OVCAR3_HILIC_IntactGlycopeptide_F4.10410.10410.5.0.dta	4251.72	5	42.34	HNNDTQHIWESDSNEFSVIADPR	N2H7F0S0	7-2-0-0-0	-2	0	2	0	1	0	1	23	b2/b3/b4/b5/b6/b7/b8/b9/	y1/y2/y3/y4/y5/y6/y7/y8/y9/y10/y11/y12/y13/y14/y15/	1540.53	2711.19	#N/A	5	4251.72	1	1	1
4	10428	SunS_13_OVCAR3_HILIC_IntactGlycopeptide_F4.10428.10428.4.0.dta	4251.7	4	42.38	HNNDTQHIWESDSNEFSVIADPR	N2H7F0S0	7-2-0-0-0	-2	0	2	0	1	0	1	27	b2/b3/b4/b5/b6/b7/b8/b9/b10/b21/	y1/y2/y3/y4/y5/y6/y7/y8/y9/y10/y11/y12/y13/y14/y15/y16/y19/	1540.53	2711.17	#N/A	4	4251.72	1	1	1
4	10431	SunS_13_OVCAR3_HILIC_IntactGlycopeptide_F4.10431.10431.4.0.dta	4089.67	4	42.39	HNNDTQHIWESDSNEFSVIADPR	N2H6F0S0	6-2-0-0-0	-2	0	2	0	1	0	1	29	b2/b3/b4/b5/b6/b7/b8/b9/b10/b15/b21/	y1/y2/y3/y4/y5/y6/y7/y8/y9/y10/y11/y12/y13/y14/y15/y16/y17/y19/	1378.48	2711.19	#N/A	4	4089.68	1	1	1
4	10432	SunS_13_OVCAR3_HILIC_IntactGlycopeptide_F4.10432.10432.3.0.dta	4251.7	3	42.4	HNNDTQHIWESDSNEFSVIADPR	N2H7F0S0	7-2-0-0-0	-2	0	2	0	1	0	1	28	b2/b3/b4/b5/b6/b7/b8/b9/b10/b12/b21/	y1/y2/y3/y4/y5/y6/y7/y8/y9/y10/y11/y12/y13/y14/y15/y16/y19/	1540.53	2711.17	#N/A	3	4251.71	1	1	1
4	10439	SunS_13_OVCAR3_HILIC_IntactGlycopeptide_F4.10439.10439.4.0.dta	4358.8	4	42.41	HNNDTQHIWESDSNEFSVIADPR	N5H3F1S0	3-5-0-1-0	-2	0	2	0	1	0	1	22	b2/b3/b4/b7/b8/b21/	y1/y2/y3/y4/y5/y6/y7/y8/y9/y11/y12/y13/y14/y15/y16/y17/	1647.61	2711.18	2264	4	4358.8	1	1	1
4	10443	SunS_13_OVCAR3_HILIC_IntactGlycopeptide_F4.10443.10443.3.0.dta	4358.79	3	42.42	HNNDTQHIWESDSNEFSVIADPR	N5H3F1S0	3-5-0-1-0	-2	0	2	0	1	0	1	15	b2/b3/b21/	y1/y2/y4/y5/y6/y7/y8/y11/y12/y13/y14/y15/	1647.61	2711.18	2430	3	4358.79	1	1	1
4	10452	SunS_13_OVCAR3_HILIC_IntactGlycopeptide_F4.10452.10452.4.0.dta	3927.62	4	42.44	HNNDTQHIWESDSNEFSVIADPR	N2H5F0S0	5-2-0-0-0	-1	0	2	0	1	0	1	18	b2/b3/b5/b8/b9/	y1/y2/y3/y4/y5/y6/y7/y8/y9/y12/y13/y14/y15/	1216.42	2711.2	#N/A	4	3927.62	1	1	1
4	10464	SunS_13_OVCAR3_HILIC_IntactGlycopeptide_F4.10464.10464.4.0.dta	4413.76	4	42.47	HNNDTQHIWESDSNEFSVIADPR	N2H8F0S0	8-2-0-0-0	-2	0	2	0	1	0	1	23	b2/b3/b4/b5/b6/b7/b8/	y1/y2/y3/y4/y5/y6/y7/y8/y9/y10/y11/y12/y13/y14/y15/y16/	1702.58	2711.18	#N/A	2	2207.39	0	1	0
4	10481	SunS_13_OVCAR3_HILIC_IntactGlycopeptide_F4.10481.10481.3.0.dta	4089.65	3	42.51	HNNDTQHIWESDSNEFSVIADPR	N2H6F0S0	6-2-0-0-0	-2	0	2	0	1	0	1	29	b2/b3/b4/b5/b6/b7/b8/b9/b10/b21/	y1/y2/y3/y4/y5/y6/y7/y8/y9/y10/y11/y12/y13/y14/y15/y16/y17/y19/y20/	1378.48	2711.17	#N/A	3	4089.67	1	1	1
4	10482	SunS_13_OVCAR3_HILIC_IntactGlycopeptide_F4.10482.10482.5.0.dta	4089.67	5	42.52	HNNDTQHIWESDSNEFSVIADPR	N2H6F0S0	6-2-0-0-0	-2	0	1	0	0	0	1	25	b2/b3/b4/b5/b6/b7/b8/b9/b10/b15/	y1/y2/y3/y4/y5/y6/y7/y8/y9/y10/y11/y12/y13/y14/y15/	1378.48	2711.19	#N/A	5	4089.67	1	1	1
4	10483	SunS_13_OVCAR3_HILIC_IntactGlycopeptide_F4.10483.10483.4.0.dta	4155.7	4	42.52	HNNDTQHIWESDSNEFSVIADPR	N4H3F1S0	3-4-0-1-0	-2	0	2	0	1	0	1	27	b2/b3/b4/b5/b6/b7/b8/b9/b10/b21/	y1/y2/y3/y4/y5/y6/y7/y8/y10/y11/y12/y13/y14/y15/y16/y17/y19/	1444.53	2711.17	2194	4	4155.73	1	1	1
4	10492	SunS_13_OVCAR3_HILIC_IntactGlycopeptide_F4.10492.10492.5.0.dta	4155.71	5	42.54	HNNDTQHIWESDSNEFSVIADPR	N4H3F1S0	3-4-0-1-0	-2	0	2	0	1	0	1	20	b2/b3/b5/b6/b7/b8/	y1/y2/y3/y4/y5/y6/y7/y8/y9/y11/y12/y13/y14/y15/	1444.53	2711.17	1286	5	4155.73	1	1	1
4	10503	SunS_13_OVCAR3_HILIC_IntactGlycopeptide_F4.10503.10503.3.0.dta	4413.77	3	42.57	HNNDTQHIWESDSNEFSVIADPR	N2H8F0S0	8-2-0-0-0	-2	0	2	0	1	0	1	15	b2/b3/b8/b12/	y1/y2/y3/y4/y5/y7/y8/y11/y12/y14/y15/	1702.58	2711.18	3182	3	4413.77	1	1	1
4	10515	SunS_13_OVCAR3_HILIC_IntactGlycopeptide_F4.10515.10515.3.0.dta	3927.62	3	42.59	HNNDTQHIWESDSNEFSVIADPR	N2H5F0S0	5-2-0-0-0	-2	0	2	0	1	0	1	29	b2/b3/b4/b5/b6/b7/b8/b9/b10/b12/b21/	y1/y2/y3/y4/y5/y6/y7/y8/y9/y10/y11/y12/y13/y14/y15/y16/y17/y19/	1216.42	2711.2	2203	3	3927.61	1	1	1
4	10531	SunS_13_OVCAR3_HILIC_IntactGlycopeptide_F4.10531.10531.4.0.dta	4575.84	4	42.63	HNNDTQHIWESDSNEFSVIADPR	N2H9F0S0	9-2-0-0-0	-2	0	2	0	1	0	1	16	b2/b3/b5/b9/	y1/y2/y3/y4/y5/y6/y7/y8/y11/y12/y13/y15/	1864.63	2711.2	1394	4	4575.81	1	1	1
4	10534	SunS_13_OVCAR3_HILIC_IntactGlycopeptide_F4.10534.10534.3.0.dta	4155.72	3	42.64	HNNDTQHIWESDSNEFSVIADPR	N4H3F1S0	3-4-0-1-0	-2	0	2	0	1	0	1	25	b2/b3/b4/b6/b7/b8/b9/b21/	y1/y2/y3/y4/y5/y6/y7/y8/y9/y10/y11/y12/y13/y14/y15/y16/y19/	1444.53	2711.19	2170	3	4155.72	1	1	1
4	10544	SunS_13_OVCAR3_HILIC_IntactGlycopeptide_F4.10544.10544.4.0.dta	4089.67	4	42.67	HNNDTQHIWESDSNEFSVIADPR	N2H6F0S0	6-2-0-0-0	-2	0	2	0	1	0	1	28	b2/b3/b4/b5/b6/b7/b8/b9/b10/b12/b15/b21/	y1/y2/y3/y4/y5/y6/y7/y8/y9/y10/y11/y12/y13/y14/y15/y16/	1378.48	2711.19	#N/A	4	4089.67	1	1	1
4	10545	SunS_13_OVCAR3_HILIC_IntactGlycopeptide_F4.10545.10545.4.0.dta	4251.74	4	42.67	HNNDTQHIWESDSNEFSVIADPR	N2H7F0S0	7-2-0-0-0	0	0	2	0	1	0	1	19	b2/b3/b5/b8/b21/	y1/y2/y3/y4/y5/y6/y7/y8/y9/y11/y12/y13/y14/y15/	1540.53	2711.21	#N/A	2	2126.87	0	1	0
4	10546	SunS_13_OVCAR3_HILIC_IntactGlycopeptide_F4.10546.10546.3.0.dta	4251.74	3	42.67	HNNDTQHIWESDSNEFSVIADPR	N2H7F0S0	7-2-0-0-0	-2	0	2	0	1	0	1	15	b2/b3/b7/	y1/y2/y4/y5/y7/y8/y10/y11/y12/y13/y14/y15/	1540.53	2711.21	2669	3	4251.71	1	1	1
4	10548	SunS_13_OVCAR3_HILIC_IntactGlycopeptide_F4.10548.10548.3.0.dta	4280.73	3	42.67	MYSEGSDIVPQSNETALHYFK	N2H9F0S0	9-2-0-0-0	-2	0	2	0	1	0	1	16	b2/b3/b6/b7/b8/b9/	y1/y2/y3/y4/y5/y6/y7/y8/y10/y12/	1864.63	2416.09	#N/A	3	4280.72	1	0	0
4	10562	SunS_13_OVCAR3_HILIC_IntactGlycopeptide_F4.10562.10562.4.0.dta	3927.62	4	42.71	HNNDTQHIWESDSNEFSVIADPR	N2H5F0S0	5-2-0-0-0	-1	0	2	0	1	0	1	27	b2/b3/b4/b5/b6/b7/b8/b9/b10/b12/b15/	y1/y2/y3/y4/y5/y6/y7/y8/y9/y10/y11/y12/y13/y14/y15/y16/	1216.42	2711.2	#N/A	4	3927.62	1	1	1
4	10564	SunS_13_OVCAR3_HILIC_IntactGlycopeptide_F4.10564.10564.4.0.dta	3952.64	4	42.72	HNNDTQHIWESDSNEFSVIADPR	N3H3F1S0	3-3-0-1-0	-2	0	2	0	1	0	1	28	b2/b3/b4/b5/b6/b7/b8/b9/b10/b11/b21/	y1/y2/y3/y4/y5/y6/y7/y8/y9/y10/y11/y12/y13/y14/y15/y16/y17/	1241.45	2711.19	1965	4	3952.65	1	1	1
4	10567	SunS_13_OVCAR3_HILIC_IntactGlycopeptide_F4.10567.10567.3.0.dta	3952.66	3	42.72	HNNDTQHIWESDSNEFSVIADPR	N3H3F1S0	3-3-0-1-0	-2	0	2	0	1	0	1	26	b2/b3/b4/b5/b6/b7/b8/b9/b12/b21/	y1/y2/y3/y4/y5/y6/y7/y8/y9/y10/y11/y12/y13/y14/y15/y16/	1241.45	2711.21	2277	3	3952.65	1	1	1
4	10568	SunS_13_OVCAR3_HILIC_IntactGlycopeptide_F4.10568.10568.4.0.dta	4192.78	4	42.72	ILLTCSLNDSATEVTGHR	N4H5F2S1	5-4-1-2-0	-1	0	4	1	1	1	1	14	b2/b3/b4/b11/	y1/y2/y3/y4/y5/y6/y7/y8/y9/y10/	2205.79	1986.99	2822	4	4192.77	1	1	1
4	10583	SunS_13_OVCAR3_HILIC_IntactGlycopeptide_F4.10583.10583.4.0.dta	4413.77	4	42.76	HNNDTQHIWESDSNEFSVIADPR	N2H8F0S0	8-2-0-0-0	-3	0	2	0	1	0	1	20	b2/b3/b5/b8/	y1/y2/y3/y4/y5/y6/y7/y8/y9/y10/y11/y12/y13/y14/y15/y16/	1702.58	2711.19	1438	4	4413.78	1	1	1
4	10596	SunS_13_OVCAR3_HILIC_IntactGlycopeptide_F4.10596.10596.3.0.dta	4089.66	3	42.8	HNNDTQHIWESDSNEFSVIADPR	N2H6F0S0	6-2-0-0-0	-2	0	2	0	1	0	1	27	b2/b3/b4/b5/b6/b7/b8/b9/b10/b21/	y1/y2/y3/y4/y5/y6/y7/y8/y9/y10/y11/y12/y13/y14/y15/y16/y17/	1378.48	2711.19	2400	3	4089.67	1	1	1
4	10597	SunS_13_OVCAR3_HILIC_IntactGlycopeptide_F4.10597.10597.4.0.dta	4155.72	4	42.8	HNNDTQHIWESDSNEFSVIADPR	N4H3F1S0	3-4-0-1-0	-2	0	2	0	1	0	1	14	b3/b5/	y1/y2/y3/y4/y5/y6/y7/y8/y11/y13/y14/y15/	1444.53	2711.19	2370	4	4155.73	1	1	1
4	10601	SunS_13_OVCAR3_HILIC_IntactGlycopeptide_F4.10601.10601.5.0.dta	4089.66	5	42.81	HNNDTQHIWESDSNEFSVIADPR	N2H6F0S0	6-2-0-0-0	-2	0	1	0	0	0	1	10	b2/b3/	y1/y2/y3/y4/y5/y6/y7/y8/	1378.48	2711.18	#N/A	5	4089.67	1	1	1
4	10610	SunS_13_OVCAR3_HILIC_IntactGlycopeptide_F4.10610.10610.3.0.dta	4192.78	3	42.83	ILLTCSLNDSATEVTGHR	N4H5F2S1	5-4-1-2-0	-2	0	4	1	1	1	1	9	b2/	y1/y3/y4/y5/y6/y7/y9/y10/	2205.79	1986.98	2943	3	4192.78	1	1	1
4	10618	SunS_13_OVCAR3_HILIC_IntactGlycopeptide_F4.10618.10618.4.0.dta	3749.57	4	42.85	HNNDTQHIWESDSNEFSVIADPR	N2H3F1S0	3-2-0-1-0	0	0	2	0	1	0	1	19	b2/b3/b5/b6/b7/b8/b9/	y1/y2/y3/y4/y5/y6/y7/y8/y11/y12/y14/y15/	1038.38	2711.19	#N/A	4	3749.58	1	1	1
4	10621	SunS_13_OVCAR3_HILIC_IntactGlycopeptide_F4.10621.10621.3.0.dta	3794.58	3	42.86	MYSEGSDIVPQSNETALHYFK	N2H6F0S0	6-2-0-0-0	0	0	4	1	1	1	1	20	b2/b3/b4/b5/b6/b7/b8/b9/b15/	y1/y2/y3/y4/y5/y6/y7/y8/y10/y12/y13/	1378.48	2416.1	4538	3	3794.58	1	0	0
4	10622	SunS_13_OVCAR3_HILIC_IntactGlycopeptide_F4.10622.10622.4.0.dta	3794.57	4	42.86	MYSEGSDIVPQSNETALHYFK	N2H6F0S0	6-2-0-0-0	-2	0	2	0	1	0	1	17	b2/b3/b4/b5/b7/b8/b9/b15/	y1/y2/y3/y4/y5/y6/y7/y10/y12/	1378.48	2416.09	#N/A	2	1897.79	0	1	0
4	10625	SunS_13_OVCAR3_HILIC_IntactGlycopeptide_F4.10625.10625.3.0.dta	3749.58	3	42.87	HNNDTQHIWESDSNEFSVIADPR	N2H3F1S0	3-2-0-1-0	-2	0	2	0	1	0	1	21	b2/b3/b5/b6/b8/	y1/y2/y3/y4/y5/y7/y8/y9/y10/y11/y12/y13/y14/y15/y16/y17/	1038.38	2711.21	2314	3	3749.58	1	1	1
4	10633	SunS_13_OVCAR3_HILIC_IntactGlycopeptide_F4.10633.10633.3.0.dta	3927.63	3	42.89	HNNDTQHIWESDSNEFSVIADPR	N2H5F0S0	5-2-0-0-0	0	0	1	0	0	0	1	16	b2/b3/b6/b7/b8/	y1/y2/y4/y5/y6/y7/y11/y12/y13/y14/y15/	1216.42	2711.21	2637	3	3927.62	1	1	1
4	10649	SunS_13_OVCAR3_HILIC_IntactGlycopeptide_F4.10649.10649.4.0.dta	4089.68	4	42.93	HNNDTQHIWESDSNEFSVIADPR	N2H6F0S0	6-2-0-0-0	-2	0	2	0	1	0	1	23	b2/b3/b5/b6/b7/b8/b9/b21/	y1/y2/y3/y4/y5/y6/y7/y8/y9/y10/y11/y12/y13/y14/y15/	1378.48	2711.2	#N/A	4	4089.68	1	1	1
4	10650	SunS_13_OVCAR3_HILIC_IntactGlycopeptide_F4.10650.10650.4.0.dta	4378.8	4	42.93	EDAQINTTIGSVTAQDPDAAR	N4H5F2S1	5-4-1-2-0	-2	0	4	1	1	1	1	26	b2/b3/b4/b5/b7/b8/b9/b10/b11/b14/	y1/y2/y3/y5/y6/y7/y8/y9/y10/y11/y12/y13/y14/y15/y16/y19/	2205.79	2173.01	459	4	4378.82	1	1	1
4	10668	SunS_13_OVCAR3_HILIC_IntactGlycopeptide_F4.10668.10668.4.0.dta	3927.61	4	42.98	HNNDTQHIWESDSNEFSVIADPR	N2H5F0S0	5-2-0-0-0	-2	0	2	0	1	0	1	15	b2/b3/b7/b10/	y1/y2/y3/y4/y5/y6/y7/y8/y12/y13/y15/	1216.42	2711.19	1343	4	3927.62	1	1	1
4	10691	SunS_13_OVCAR3_HILIC_IntactGlycopeptide_F4.10691.10691.3.0.dta	4378.82	3	43.03	EDAQINTTIGSVTAQDPDAAR	N4H5F2S1	5-4-1-2-0	-2	0	3	1	0	1	1	22	b4/b5/b7/b10/b11/b14/	y1/y2/y3/y5/y6/y7/y8/y9/y10/y11/y12/y13/y14/y15/y16/y17/	2205.79	2173.03	618	3	4378.83	1	1	1
4	10713	SunS_13_OVCAR3_HILIC_IntactGlycopeptide_F4.10713.10713.3.0.dta	4089.66	3	43.09	HNNDTQHIWESDSNEFSVIADPR	N2H6F0S0	6-2-0-0-0	-2	0	2	0	1	0	1	17	b2/b3/b5/b8/b9/b21/	y1/y2/y4/y5/y7/y8/y11/y12/y13/y14/y15/	1378.48	2711.18	2595	3	4089.67	1	1	1
4	10720	SunS_13_OVCAR3_HILIC_IntactGlycopeptide_F4.10720.10720.4.0.dta	4435.85	4	43.11	EDAQINTTIGSVTAQDPDAAR	N5H5F1S1	5-5-1-1-0	-2	0	4	1	1	1	1	21	b4/b5/b7/b10/b11/b14/b15/	y1/y2/y3/y5/y6/y7/y8/y9/y10/y11/y12/y13/y14/y15/	2262.81	2173.03	1134	4	4435.84	1	1	1
4	10722	SunS_13_OVCAR3_HILIC_IntactGlycopeptide_F4.10722.10722.4.0.dta	4575.8	4	43.11	HNNDTQHIWESDSNEFSVIADPR	N2H9F0S0	9-2-0-0-0	-3	0	1	0	0	0	1	11	b2/b3/	y1/y2/y3/y4/y5/y6/y7/y8/y11/	1864.63	2711.16	1543	4	4575.84	1	1	1
4	10740	SunS_13_OVCAR3_HILIC_IntactGlycopeptide_F4.10740.10740.4.0.dta	4232.75	4	43.16	EDAQINTTIGSVTAQDPDAAR	N4H5F1S1	5-4-1-1-0	-2	0	3	1	0	1	1	23	b2/b4/b5/b7/b9/b10/b11/b14/	y1/y2/y3/y5/y6/y7/y8/y9/y10/y11/y12/y13/y14/y15/y16/	2059.73	2173.01	573	4	4232.77	1	1	1
4	10757	SunS_13_OVCAR3_HILIC_IntactGlycopeptide_F4.10757.10757.5.0.dta	4232.76	5	43.2	EDAQINTTIGSVTAQDPDAAR	N4H5F1S1	5-4-1-1-0	-1	0	1	0	0	0	1	13	b4/b7/b10/	y1/y3/y5/y6/y7/y8/y9/y10/y12/y13/	2059.73	2173.03	1663	5	4232.77	1	1	1
4	10775	SunS_13_OVCAR3_HILIC_IntactGlycopeptide_F4.10775.10775.4.0.dta	3927.62	4	43.25	HNNDTQHIWESDSNEFSVIADPR	N2H5F0S0	5-2-0-0-0	-2	0	1	0	0	0	1	11	b3/b6/b8/	y1/y2/y4/y5/y6/y7/y8/y14/	1216.42	2711.2	999	4	3927.63	1	1	1
4	10800	SunS_13_OVCAR3_HILIC_IntactGlycopeptide_F4.10800.10800.4.0.dta	4413.76	4	43.31	HNNDTQHIWESDSNEFSVIADPR	N2H8F0S0	8-2-0-0-0	-2	0	1	0	0	0	1	16	b2/b3/b12/	y1/y2/y3/y4/y5/y6/y7/y8/y10/y11/y12/y13/y15/	1702.58	2711.18	1377	4	4413.78	1	1	1
4	10818	SunS_13_OVCAR3_HILIC_IntactGlycopeptide_F4.10818.10818.4.0.dta	4273.79	4	43.35	EDAQINTTIGSVTAQDPDAAR	N5H4F1S1	4-5-1-1-0	-2	0	3	0	1	1	1	23	b4/b5/b7/b8/b9/b10/b11/b14/	y1/y2/y3/y5/y6/y7/y8/y9/y10/y11/y12/y13/y14/y15/y16/	2100.76	2173.02	#N/A	2	2137.4	0	1	0
4	10823	SunS_13_OVCAR3_HILIC_IntactGlycopeptide_F4.10823.10823.3.0.dta	4089.68	3	43.37	HNNDTQHIWESDSNEFSVIADPR	N2H6F0S0	6-2-0-0-0	-2	0	2	0	1	0	1	19	b2/b3/b5/b8/	y1/y2/y3/y4/y5/y6/y7/y8/y10/y11/y12/y13/y14/y15/y16/	1378.48	2711.2	2461	3	4089.68	1	1	1
4	10841	SunS_13_OVCAR3_HILIC_IntactGlycopeptide_F4.10841.10841.3.0.dta	4413.77	3	43.41	HNNDTQHIWESDSNEFSVIADPR	N2H8F0S0	8-2-0-0-0	-2	0	2	0	1	0	1	7	b3/	y1/y2/y4/y5/y11/y15/	1702.58	2711.18	1940	3	4414.78	0	1	0
4	10872	SunS_13_OVCAR3_HILIC_IntactGlycopeptide_F4.10872.10872.4.0.dta	4089.68	4	43.49	HNNDTQHIWESDSNEFSVIADPR	N2H6F0S0	6-2-0-0-0	0	0	2	0	1	0	1	19	b2/b3/b5/b8/b9/	y1/y2/y3/y4/y5/y6/y7/y8/y9/y11/y12/y13/y14/y15/	1378.48	2711.2	#N/A	4	4089.68	1	1	1
4	10900	SunS_13_OVCAR3_HILIC_IntactGlycopeptide_F4.10900.10900.4.0.dta	4251.71	4	43.56	HNNDTQHIWESDSNEFSVIADPR	N2H7F0S0	7-2-0-0-0	-2	0	2	0	1	0	1	12	b3/b5/	y1/y2/y3/y4/y5/y6/y7/y8/y11/y12/	1540.53	2711.18	2480	4	4251.72	1	1	1
4	10902	SunS_13_OVCAR3_HILIC_IntactGlycopeptide_F4.10902.10902.4.0.dta	4413.8	4	43.57	HNNDTQHIWESDSNEFSVIADPR	N2H8F0S0	8-2-0-0-0	0	0	1	0	0	0	1	15	b2/b3/b5/	y1/y2/y3/y4/y5/y6/y7/y8/y11/y12/y13/y15/	1702.58	2711.21	1718	4	4413.78	1	1	1
4	10904	SunS_13_OVCAR3_HILIC_IntactGlycopeptide_F4.10904.10904.4.0.dta	3927.63	4	43.57	HNNDTQHIWESDSNEFSVIADPR	N2H5F0S0	5-2-0-0-0	0	0	1	0	0	0	1	13	b2/b3/	y1/y2/y3/y4/y5/y6/y7/y8/y11/y12/y15/	1216.42	2711.21	1741	4	3927.62	1	1	1
4	10947	SunS_13_OVCAR3_HILIC_IntactGlycopeptide_F4.10947.10947.3.0.dta	4089.65	3	43.68	HNNDTQHIWESDSNEFSVIADPR	N2H6F0S0	6-2-0-0-0	-2	0	2	0	1	0	1	13	b2/b3/b8/	y1/y2/y4/y5/y7/y8/y11/y13/y14/y15/	1378.48	2711.18	2639	3	4089.68	1	1	1
4	11037	SunS_13_OVCAR3_HILIC_IntactGlycopeptide_F4.11037.11037.3.0.dta	3780.54	3	43.91	EPGSNVTMSVDAECVPMVR	N2H8F0S0	8-2-0-0-0	-2	0	2	0	1	0	1	16	b6/b10/	y1/y2/y3/y4/y5/y6/y7/y8/y9/y10/y11/y12/y13/y14/	1702.58	2077.96	#N/A	3	3780.52	1	0	0
4	11042	SunS_13_OVCAR3_HILIC_IntactGlycopeptide_F4.11042.11042.4.0.dta	4050.75	4	43.92	HLNASNPTEPATIIFTAAR	N2H10F0S0	10-2-0-0-0	-2	0	2	0	1	0	1	12	b2/b4/	y1/y4/y5/y6/y7/y8/y10/y11/y13/y15/	2026.69	2024.06	2779	4	4050.75	1	1	1
4	11064	SunS_13_OVCAR3_HILIC_IntactGlycopeptide_F4.11064.11064.4.0.dta	3888.68	4	43.98	HLNASNPTEPATIIFTAAR	N2H9F0S0	9-2-0-0-0	-2	0	3	0	1	1	1	23	b2/b4/b5/b6/b9/b11/	y1/y2/y3/y4/y5/y6/y7/y8/y9/y10/y11/y12/y13/y14/y15/y16/y17/	1864.63	2024.04	966	4	3888.68	1	1	1
4	11067	SunS_13_OVCAR3_HILIC_IntactGlycopeptide_F4.11067.11067.4.0.dta	4217.81	4	43.99	FAEINGSALCSYNLKPSEYTTSPK	N2H7F0S0	7-2-0-0-0	0	0	2	0	1	0	1	26	b2/b3/b4/b5/b6/b7/b8/b9/b10/b11/b14/	y1/y2/y3/y4/y5/y6/y8/y9/y10/y11/y12/y13/y14/y15/y16/	1540.53	2677.28	2858	4	4217.8	1	1	1
4	11075	SunS_13_OVCAR3_HILIC_IntactGlycopeptide_F4.11075.11075.3.0.dta	3888.68	3	44.01	HLNASNPTEPATIIFTAAR	N2H9F0S0	9-2-0-0-0	-2	0	4	1	1	1	1	25	b2/b4/b5/b6/b7/b9/b11/b14/	y1/y2/y3/y4/y5/y6/y7/y8/y9/y10/y11/y12/y13/y14/y15/y16/y17/	1864.63	2024.05	1635	3	3888.68	1	1	1
4	11093	SunS_13_OVCAR3_HILIC_IntactGlycopeptide_F4.11093.11093.4.0.dta	3726.62	4	44.06	HLNASNPTEPATIIFTAAR	N2H8F0S0	8-2-0-0-0	-2	0	4	1	1	1	1	25	b2/b4/b5/b6/b7/b8/b9/b11/	y1/y2/y3/y4/y5/y6/y7/y8/y9/y10/y11/y12/y13/y14/y15/y16/y17/	1702.58	2024.03	887	4	3726.63	1	1	1
4	11094	SunS_13_OVCAR3_HILIC_IntactGlycopeptide_F4.11094.11094.3.0.dta	3726.63	3	44.06	HLNASNPTEPATIIFTAAR	N2H8F0S0	8-2-0-0-0	-1	0	4	1	1	1	1	28	b2/b3/b4/b5/b6/b7/b8/b9/b11/b13/b14/	y1/y2/y3/y4/y5/y6/y7/y8/y9/y10/y11/y12/y13/y14/y15/y16/y17/	1702.58	2024.05	1104	3	3726.63	1	1	1
4	11098	SunS_13_OVCAR3_HILIC_IntactGlycopeptide_F4.11098.11098.3.0.dta	4217.78	3	44.07	FAEINGSALCSYNLKPSEYTTSPK	N2H7F0S0	7-2-0-0-0	0	0	2	0	1	0	1	33	b2/b3/b4/b5/b6/b7/b8/b9/b10/b11/b12/b13/b14/b15/	y1/y2/y3/y4/y5/y6/y7/y8/y9/y10/y11/y12/y13/y14/y15/y16/y17/y19/y20/	1540.53	2677.25	1847	3	4217.8	1	1	1
4	11120	SunS_13_OVCAR3_HILIC_IntactGlycopeptide_F4.11120.11120.4.0.dta	4413.76	4	44.12	HNNDTQHIWESDSNEFSVIADPR	N2H8F0S0	8-2-0-0-0	-1	0	2	0	1	0	1	15	b3/b5/	y1/y2/y3/y4/y5/y6/y7/y8/y11/y12/y13/y14/y15/	1702.58	2711.17	1293	4	4413.78	1	1	1
4	11141	SunS_13_OVCAR3_HILIC_IntactGlycopeptide_F4.11141.11141.4.0.dta	3564.58	4	44.17	HLNASNPTEPATIIFTAAR	N2H7F0S0	7-2-0-0-0	-2	0	3	1	1	0	1	24	b2/b4/b5/b6/b8/b9/b11/	y1/y2/y3/y4/y5/y6/y7/y8/y9/y10/y11/y12/y13/y14/y15/y16/y17/	1540.53	2024.05	1505	4	3564.58	1	1	1
4	11176	SunS_13_OVCAR3_HILIC_IntactGlycopeptide_F4.11176.11176.3.0.dta	3564.59	3	44.26	HLNASNPTEPATIIFTAAR	N2H7F0S0	7-2-0-0-0	0	0	4	1	1	1	1	28	b2/b3/b4/b5/b6/b7/b8/b9/b11/b13/b14/	y1/y2/y3/y4/y5/y6/y7/y8/y9/y10/y11/y12/y13/y14/y15/y16/y17/	1540.53	2024.06	1119	3	3564.58	1	1	1
4	11191	SunS_13_OVCAR3_HILIC_IntactGlycopeptide_F4.11191.11191.3.0.dta	3379.45	3	44.3	QSIGQNYSNVIANLR	N2H8F0S0	8-2-0-0-0	-2	0	2	0	0	1	1	7	b3/b5/b8/b9/b12/	y1/y10/	1702.58	1676.86	#N/A	3	3379.44	1	0	0
4	11203	SunS_13_OVCAR3_HILIC_IntactGlycopeptide_F4.11203.11203.3.0.dta	3726.62	3	44.33	HLNASNPTEPATIIFTAAR	N2H8F0S0	8-2-0-0-0	-2	0	2	0	1	0	1	20	b2/b3/b4/b5/b6/b9/b14/	y1/y3/y4/y5/y6/y7/y8/y10/y11/y13/y14/y15/y16/	1702.58	2024.03	2482	3	3726.63	1	1	1
4	11216	SunS_13_OVCAR3_HILIC_IntactGlycopeptide_F4.11216.11216.3.0.dta	4089.65	3	44.37	HNNDTQHIWESDSNEFSVIADPR	N2H6F0S0	6-2-0-0-0	-1	0	2	0	1	0	1	7	b3/b10/	y1/y2/y5/y7/y15/	1378.48	2711.17	4080	3	4089.67	1	1	1
4	11282	SunS_13_OVCAR3_HILIC_IntactGlycopeptide_F4.11282.11282.4.0.dta	4413.77	4	44.53	HNNDTQHIWESDSNEFSVIADPR	N2H8F0S0	8-2-0-0-0	-3	0	1	0	0	0	1	13	b3/b9/	y1/y2/y3/y4/y5/y6/y7/y8/y9/y12/y15/	1702.58	2711.19	1219	4	4413.77	1	1	1
4	11298	SunS_13_OVCAR3_HILIC_IntactGlycopeptide_F4.11298.11298.4.0.dta	4089.67	4	44.57	HNNDTQHIWESDSNEFSVIADPR	N2H6F0S0	6-2-0-0-0	-2	0	1	0	0	0	1	14	b3/b7/	y1/y2/y3/y4/y5/y6/y7/y8/y9/y11/y12/y15/	1378.48	2711.2	1072	4	4089.67	1	1	1
4	11328	SunS_13_OVCAR3_HILIC_IntactGlycopeptide_F4.11328.11328.4.0.dta	4251.73	4	44.64	HNNDTQHIWESDSNEFSVIADPR	N2H7F0S0	7-2-0-0-0	-1	0	1	0	0	0	1	6	b3/	y1/y2/y5/y6/y7/	1540.53	2711.2	2112	4	4251.72	1	1	1
4	11393	SunS_13_OVCAR3_HILIC_IntactGlycopeptide_F4.11393.11393.4.0.dta	4089.66	4	44.83	HNNDTQHIWESDSNEFSVIADPR	N2H6F0S0	6-2-0-0-0	-2	0	2	0	1	0	1	12	b2/b3/	y1/y2/y3/y4/y5/y6/y7/y8/y11/y15/	1378.48	2711.19	1466	4	4089.68	1	1	1
4	11408	SunS_13_OVCAR3_HILIC_IntactGlycopeptide_F4.11408.11408.3.0.dta	3767.57	3	44.87	YFYLQAVNSEGQNLTR	N2H9F0S0	9-2-0-0-0	-1	0	4	1	1	1	1	21	b1/b2/b3/b4/b5/b6/b7/b8/b9/	y1/y2/y3/y6/y7/y8/y9/y10/y11/y12/y13/y14/	1864.63	1902.93	7651	3	3766.57	0	1	0
4	11424	SunS_13_OVCAR3_HILIC_IntactGlycopeptide_F4.11424.11424.3.0.dta	3533.49	3	44.91	TVIRPFYLTNSSGVD	N2H9F0S0	9-2-0-0-0	-1	0	2	1	0	1	0	20	b2/b3/b4/b6/b7/b8/b9/b10/b11/b12/b13/b14/	y1/y2/y3/y4/y5/y6/y7/y8/	1864.63	1668.85	1323	3	3533.49	1	1	1
4	11479	SunS_13_OVCAR3_HILIC_IntactGlycopeptide_F4.11479.11479.5.0.dta	4443.93	5	45.05	EELGVTVYQSPHSGSFTITGNNSNFAQR	N3H4F1S0	4-3-0-1-0	-2	0	1	0	1	0	0	8	b11/b14/	y1/y2/y8/y11/y12/y17/	1403.51	3040.42	7976	5	4443.95	1	1	1
4	11482	SunS_13_OVCAR3_HILIC_IntactGlycopeptide_F4.11482.11482.3.0.dta	4443.94	3	45.06	EELGVTVYQSPHSGSFTITGNNSNFAQR	N3H4F1S0	4-3-0-1-0	-2	0	1	0	1	0	0	8	b11/b14/	y1/y2/y8/y11/y12/y17/	1403.51	3040.43	8950	3	4443.94	1	1	1
4	11484	SunS_13_OVCAR3_HILIC_IntactGlycopeptide_F4.11484.11484.3.0.dta	3371.44	3	45.07	TVIRPFYLTNSSGVD	N2H8F0S0	8-2-0-0-0	-1	0	4	1	1	1	1	20	b2/b4/b6/b7/b8/b9/b10/b11/b12/b13/b14/	y1/y2/y3/y4/y5/y6/y7/y8/y11/	1702.58	1668.86	766	3	3371.44	1	1	1
4	11492	SunS_13_OVCAR3_HILIC_IntactGlycopeptide_F4.11492.11492.4.0.dta	4089.68	4	45.1	HNNDTQHIWESDSNEFSVIADPR	N2H6F0S0	6-2-0-0-0	-1	0	1	0	0	0	1	13	b2/b3/b8/	y1/y2/y3/y4/y5/y6/y7/y8/y11/y15/	1378.48	2711.21	1593	4	4089.68	1	1	1
4	11494	SunS_13_OVCAR3_HILIC_IntactGlycopeptide_F4.11494.11494.4.0.dta	4413.78	4	45.1	HNNDTQHIWESDSNEFSVIADPR	N2H8F0S0	8-2-0-0-0	0	0	2	0	1	0	1	12	b3/	y1/y2/y3/y4/y5/y6/y7/y8/y11/y13/y15/	1702.58	2711.2	1355	4	4414.78	0	1	0
4	11498	SunS_13_OVCAR3_HILIC_IntactGlycopeptide_F4.11498.11498.3.0.dta	4297.87	3	45.11	EELGVTVYQSPHSGSFTITGNNSNFAQR	N3H4F0S0	4-3-0-0-0	-1	0	1	0	1	0	0	7	b11/b14/	y1/y2/y8/y11/y12/	1257.45	3040.42	8629	3	4297.88	1	1	1
4	11511	SunS_13_OVCAR3_HILIC_IntactGlycopeptide_F4.11511.11511.5.0.dta	4297.88	5	45.14	EELGVTVYQSPHSGSFTITGNNSNFAQR	N3H4F0S0	4-3-0-0-0	-2	0	1	0	1	0	0	8	b11/b14/	y1/y2/y8/y11/y12/y17/	1257.45	3040.43	9536	5	4297.88	1	1	1
4	11529	SunS_13_OVCAR3_HILIC_IntactGlycopeptide_F4.11529.11529.5.0.dta	4500.95	5	45.19	EELGVTVYQSPHSGSFTITGNNSNFAQR	N4H4F0S0	4-4-0-0-0	-2	0	1	0	1	0	0	6	b11/	y1/y2/y8/y11/y12/	1460.53	3040.42	8343	5	4500.96	1	1	1
4	11535	SunS_13_OVCAR3_HILIC_IntactGlycopeptide_F4.11535.11535.4.0.dta	4575.85	4	45.2	HNNDTQHIWESDSNEFSVIADPR	N2H9F0S0	9-2-0-0-0	-2	0	1	0	0	0	1	7	b3/	y1/y2/y4/y5/y7/y11/	1864.63	2711.22	5395	4	4575.87	1	1	1
4	11537	SunS_13_OVCAR3_HILIC_IntactGlycopeptide_F4.11537.11537.4.0.dta	4443.93	4	45.21	EELGVTVYQSPHSGSFTITGNNSNFAQR	N3H4F1S0	4-3-0-1-0	-2	0	1	0	1	0	0	7	b11/b14/	y1/y2/y8/y11/y12/	1403.51	3040.42	8366	4	4443.95	1	1	1
4	11540	SunS_13_OVCAR3_HILIC_IntactGlycopeptide_F4.11540.11540.4.0.dta	4297.87	4	45.22	EELGVTVYQSPHSGSFTITGNNSNFAQR	N3H4F0S0	4-3-0-0-0	-2	0	1	0	1	0	0	11	b1/b11/b14/b20/	y1/y2/y5/y8/y11/y12/y17/	1257.45	3040.42	9553	4	4297.88	1	1	1
4	11542	SunS_13_OVCAR3_HILIC_IntactGlycopeptide_F4.11542.11542.4.0.dta	4500.95	4	45.22	EELGVTVYQSPHSGSFTITGNNSNFAQR	N4H4F0S0	4-4-0-0-0	-2	0	1	0	1	0	0	8	b11/b14/	y1/y2/y8/y11/y12/y17/	1460.53	3040.43	9969	4	4500.96	1	1	1
4	11551	SunS_13_OVCAR3_HILIC_IntactGlycopeptide_F4.11551.11551.3.0.dta	3209.37	3	45.25	TVIRPFYLTNSSGVD	N2H7F0S0	7-2-0-0-0	-1	0	2	1	0	1	0	10	b2/b4/b6/b7/b8/b9/b13/	y2/y3/y4/	1540.53	1668.85	3090	3	3209.38	1	1	1
4	11564	SunS_13_OVCAR3_HILIC_IntactGlycopeptide_F4.11564.11564.3.0.dta	4256.83	3	45.28	EELGVTVYQSPHSGSFTITGNNSNFAQR	N2H5F0S0	5-2-0-0-0	-2	0	1	0	1	0	0	6	b14/	y1/y2/y8/y11/y12/	1216.42	3040.41	9469	3	4256.85	1	1	1
4	11566	SunS_13_OVCAR3_HILIC_IntactGlycopeptide_F4.11566.11566.4.0.dta	4256.84	4	45.28	EELGVTVYQSPHSGSFTITGNNSNFAQR	N2H5F0S0	5-2-0-0-0	0	0	1	0	1	0	0	8	b11/b14/	y1/y2/y8/y11/y12/y17/	1216.42	3040.42	8120	4	4256.86	1	1	1
4	11620	SunS_13_OVCAR3_HILIC_IntactGlycopeptide_F4.11620.11620.4.0.dta	4413.77	4	45.42	HNNDTQHIWESDSNEFSVIADPR	N2H8F0S0	8-2-0-0-0	-2	0	1	0	0	0	1	9	b3/	y1/y2/y4/y5/y6/y7/y8/y9/	1702.58	2711.19	1698	4	4413.79	1	1	1
4	11625	SunS_13_OVCAR3_HILIC_IntactGlycopeptide_F4.11625.11625.4.0.dta	4094.81	4	45.43	EELGVTVYQSPHSGSFTITGNNSNFAQR	N2H4F0S0	4-2-0-0-0	-1	0	1	0	1	0	0	8	b11/b14/	y1/y2/y8/y11/y12/y17/	1054.37	3040.44	9020	4	4094.82	1	1	1
4	11626	SunS_13_OVCAR3_HILIC_IntactGlycopeptide_F4.11626.11626.3.0.dta	3829.56	3	45.44	ENLTAPGSDSAVFFEQGTTR	N2H8F0S0	8-2-0-0-0	-2	0	4	1	1	1	1	26	b2/b3/b4/b5/b6/b8/b11/b12/	y1/y2/y3/y4/y5/y6/y7/y8/y9/y10/y11/y12/y13/y14/y15/y16/y17/y18/	1702.58	2126.98	351	3	3829.57	1	1	1
4	11627	SunS_13_OVCAR3_HILIC_IntactGlycopeptide_F4.11627.11627.4.0.dta	4283.75	4	45.44	ALGFENATQALGR	N6H7F2S1	7-6-1-2-0	-2	0	4	1	1	1	1	8	b2/b5/	y1/y2/y4/y5/y6/y7/	2936.06	1347.69	3821	4	4283.75	1	1	1
4	11737	SunS_13_OVCAR3_HILIC_IntactGlycopeptide_F4.11737.11737.4.0.dta	4089.67	4	45.75	HNNDTQHIWESDSNEFSVIADPR	N2H6F0S0	6-2-0-0-0	-2	0	1	0	0	0	1	13	b2/b3/	y1/y2/y3/y4/y5/y6/y7/y8/y10/y12/y15/	1378.48	2711.19	1613	4	4089.71	1	1	1
4	11775	SunS_13_OVCAR3_HILIC_IntactGlycopeptide_F4.11775.11775.3.0.dta	3505.47	3	45.87	ENLTAPGSDSAVFFEQGTTR	N2H6F0S0	6-2-0-0-0	-2	0	2	1	0	1	0	18	b2/b3/b4/b5/	y1/y2/y4/y5/y6/y7/y8/y9/y10/y11/y14/y15/y16/y17/	1378.48	2127	414	3	3505.47	1	1	1
4	11828	SunS_13_OVCAR3_HILIC_IntactGlycopeptide_F4.11828.11828.3.0.dta	4147.73	3	46.04	KLCPDCPLLAPLNDSR	N5H6F0S1	6-5-1-0-0	-2	0	3	0	1	1	1	7	b1/b3/b5/b9/b10/	y1/y2/	2278.81	1868.92	3634	3	4147.74	1	1	1
4	11832	SunS_13_OVCAR3_HILIC_IntactGlycopeptide_F4.11832.11832.4.0.dta	4147.74	4	46.05	KLCPDCPLLAPLNDSR	N5H6F0S1	6-5-1-0-0	-2	0	4	1	1	1	1	10	b1/b3/b5/b6/b8/b9/b10/	y1/y2/y6/	2278.81	1868.93	6045	4	4147.75	1	1	1
4	11837	SunS_13_OVCAR3_HILIC_IntactGlycopeptide_F4.11837.11837.4.0.dta	4089.7	4	46.06	HNNDTQHIWESDSNEFSVIADPR	N2H6F0S0	6-2-0-0-0	-2	0	1	0	0	0	1	12	b3/b5/	y1/y2/y3/y4/y5/y6/y7/y8/y12/y13/	1378.48	2711.22	1724	4	4089.69	1	1	1
4	11859	SunS_13_OVCAR3_HILIC_IntactGlycopeptide_F4.11859.11859.4.0.dta	4413.79	4	46.12	HNNDTQHIWESDSNEFSVIADPR	N2H8F0S0	8-2-0-0-0	-2	0	1	0	0	0	1	11	b2/b3/	y1/y2/y4/y5/y6/y7/y8/y11/y15/	1702.58	2711.2	1801	4	4413.81	1	1	1
4	11955	SunS_13_OVCAR3_HILIC_IntactGlycopeptide_F4.11955.11955.4.0.dta	4130.67	4	46.39	HNNDTQHIWESDSNEFSVIADPR	N3H5F0S0	5-3-0-0-0	-3	0	1	0	0	0	1	15	b3/	y1/y2/y3/y4/y5/y6/y7/y8/y9/y11/y13/y14/y15/y17/	1419.5	2711.17	2172	4	4132.68	0	1	0
4	12015	SunS_13_OVCAR3_HILIC_IntactGlycopeptide_F4.12015.12015.4.0.dta	4413.77	4	46.55	HNNDTQHIWESDSNEFSVIADPR	N2H8F0S0	8-2-0-0-0	-2	0	1	0	0	0	1	14	b3/b9/	y1/y2/y3/y4/y5/y6/y7/y8/y11/y13/y14/y15/	1702.58	2711.19	1468	4	4413.79	1	1	1
4	12112	SunS_13_OVCAR3_HILIC_IntactGlycopeptide_F4.12112.12112.4.0.dta	4251.72	4	46.79	HNNDTQHIWESDSNEFSVIADPR	N2H7F0S0	7-2-0-0-0	-2	0	1	0	0	0	1	6	b3/	y1/y2/y4/y5/y7/	1540.53	2711.19	1846	4	4251.71	1	1	1
4	12114	SunS_13_OVCAR3_HILIC_IntactGlycopeptide_F4.12114.12114.4.0.dta	4089.67	4	46.79	HNNDTQHIWESDSNEFSVIADPR	N2H6F0S0	6-2-0-0-0	-1	0	1	0	0	0	1	11	b3/b9/	y1/y2/y4/y5/y6/y7/y8/y11/y14/	1378.48	2711.19	1928	4	4089.65	1	1	1
4	12145	SunS_13_OVCAR3_HILIC_IntactGlycopeptide_F4.12145.12145.4.0.dta	3728.53	4	46.87	LCPDCPLLAPLNDSR	N5H6F0S0	6-5-0-0-0	-1	0	2	1	0	1	0	8	b2/b3/b5/b7/b9/	y2/y3/y6/	1987.71	1740.82	3734	4	3728.54	1	1	1
4	12175	SunS_13_OVCAR3_HILIC_IntactGlycopeptide_F4.12175.12175.3.0.dta	3728.53	3	46.96	LCPDCPLLAPLNDSR	N5H6F0S0	6-5-0-0-0	0	0	2	1	0	1	0	7	b2/b3/b7/b8/b9/	y1/y2/	1987.71	1740.82	5759	3	3728.54	1	1	1
4	12326	SunS_13_OVCAR3_HILIC_IntactGlycopeptide_F4.12326.12326.3.0.dta	3363.41	3	47.43	LCPDCPLLAPLNDSR	N4H5F0S0	5-4-0-0-0	0	0	3	1	0	1	1	14	b2/b3/b5/b6/b7/b8/b9/	y1/y2/y3/y6/y10/y11/y13/	1622.58	1740.83	4102	3	3363.42	1	1	1
4	12343	SunS_13_OVCAR3_HILIC_IntactGlycopeptide_F4.12343.12343.4.0.dta	3363.42	4	47.47	LCPDCPLLAPLNDSR	N4H5F0S0	5-4-0-0-0	0	0	3	1	0	1	1	15	b2/b3/b4/b5/b6/b7/b8/b9/	y1/y2/y3/y6/y7/y10/y13/	1622.58	1740.84	3820	4	3363.42	1	1	1
4	12402	SunS_13_OVCAR3_HILIC_IntactGlycopeptide_F4.12402.12402.3.0.dta	3363.41	3	47.7	LCPDCPLLAPLNDSR	N4H5F0S0	5-4-0-0-0	-1	0	3	1	0	1	1	12	b2/b3/b5/b7/b8/b9/	y1/y2/y3/y6/y7/y13/	1622.58	1740.83	3727	3	3363.42	1	1	1
4	12433	SunS_13_OVCAR3_HILIC_IntactGlycopeptide_F4.12433.12433.4.0.dta	4089.68	4	47.8	HNNDTQHIWESDSNEFSVIADPR	N2H6F0S0	6-2-0-0-0	-2	0	1	0	0	0	1	9	b2/b3/	y1/y2/y4/y5/y6/y7/y8/	1378.48	2711.21	2830	4	4089.68	1	1	1
4	12443	SunS_13_OVCAR3_HILIC_IntactGlycopeptide_F4.12443.12443.4.0.dta	4242.9	4	47.83	IFPSGNVTSVLELSSNPAHR	N5H5F2S0	5-5-0-2-0	-2	0	3	0	1	1	1	7		y1/y4/y6/y7/y8/y10/y13/	2117.78	2125.12	#N/A	2	2121.94	0	1	0
4	12495	SunS_13_OVCAR3_HILIC_IntactGlycopeptide_F4.12495.12495.3.0.dta	4096.81	3	48	IFPSGNVTSVLELSSNPAHR	N5H5F1S0	5-5-0-1-0	-2	0	2	0	1	0	1	6		y1/y4/y7/y8/y10/y13/	1971.72	2125.09	3921	3	4096.79	1	1	1
4	12520	SunS_13_OVCAR3_HILIC_IntactGlycopeptide_F4.12520.12520.5.0.dta	5336.2	5	48.08	YHYNCSLLDGTQLFTSHDYGAPQEATLGANK	N2H9F0S0	9-2-0-0-0	-2	0	2	0	1	0	1	16	b2/b3/b9/b10/b11/	y1/y2/y4/y5/y6/y7/y8/y10/y12/y13/y14/	1864.63	3471.57	3651	5	5336.21	1	1	1
4	12528	SunS_13_OVCAR3_HILIC_IntactGlycopeptide_F4.12528.12528.4.0.dta	5336.2	4	48.1	YHYNCSLLDGTQLFTSHDYGAPQEATLGANK	N2H9F0S0	9-2-0-0-0	-3	0	2	0	1	0	1	28	b1/b2/b3/b4/b5/b7/b8/b9/b10/b11/	y1/y2/y3/y4/y5/y6/y7/y8/y10/y11/y12/y13/y14/y15/y16/y17/y18/y22/	1864.63	3471.56	2941	4	5336.21	1	1	1
4	12533	SunS_13_OVCAR3_HILIC_IntactGlycopeptide_F4.12533.12533.4.0.dta	5174.17	4	48.11	YHYNCSLLDGTQLFTSHDYGAPQEATLGANK	N2H8F0S0	8-2-0-0-0	-2	0	2	0	1	0	1	31	b1/b2/b3/b4/b5/b7/b8/b9/b10/b11/b13/b14/	y1/y2/y3/y4/y5/y6/y7/y8/y9/y10/y11/y12/y13/y14/y15/y16/y17/y18/y22/	1702.58	3471.58	2420	4	5174.15	1	1	1
4	12538	SunS_13_OVCAR3_HILIC_IntactGlycopeptide_F4.12538.12538.4.0.dta	4089.66	4	48.13	HNNDTQHIWESDSNEFSVIADPR	N2H6F0S0	6-2-0-0-0	0	0	1	0	0	0	1	9	b3/	y1/y2/y4/y5/y6/y7/y8/y13/	1378.48	2711.19	2849	4	4089.68	1	1	1
4	12554	SunS_13_OVCAR3_HILIC_IntactGlycopeptide_F4.12554.12554.3.0.dta	5174.17	3	48.19	YHYNCSLLDGTQLFTSHDYGAPQEATLGANK	N2H8F0S0	8-2-0-0-0	-2	0	2	0	1	0	1	29	b1/b2/b3/b4/b5/b7/b8/b9/b11/b14/	y1/y2/y3/y4/y5/y6/y7/y8/y9/y10/y11/y12/y13/y14/y15/y16/y17/y18/y22/	1702.58	3471.59	2472	3	5174.16	1	1	1
4	12559	SunS_13_OVCAR3_HILIC_IntactGlycopeptide_F4.12559.12559.5.0.dta	5538.4	5	48.2	FLKPYTLEEQKNLTVCPDGALFEQK	N5H6F0S2	6-5-2-0-0	-4	0	2	0	1	0	1	16	b2/b3/b8/b10/	y1/y2/y3/y4/y5/y7/y8/y9/y10/y11/y12/y13/	2569.9	2968.5	12084	5	5539.43	0	1	0
4	12575	SunS_13_OVCAR3_HILIC_IntactGlycopeptide_F4.12575.12575.4.0.dta	5393.38	4	48.26	FLKPYTLEEQKNLTVCPDGALFEQK	N5H6F1S1	6-5-1-1-0	-2	0	2	0	1	0	1	10	b10/	y3/y4/y5/y7/y9/y10/y11/y12/y13/	2424.87	2968.51	4307	4	5393.37	1	1	1
4	12577	SunS_13_OVCAR3_HILIC_IntactGlycopeptide_F4.12577.12577.4.0.dta	5012.12	4	48.27	YHYNCSLLDGTQLFTSHDYGAPQEATLGANK	N2H7F0S0	7-2-0-0-0	0	0	2	0	1	0	1	31	b2/b3/b4/b5/b6/b7/b8/b9/b10/b11/b12/b13/	y1/y2/y3/y4/y5/y6/y7/y8/y9/y10/y11/y12/y13/y14/y15/y16/y17/y18/y22/	1540.53	3471.59	2763	4	5012.11	1	1	1
4	12578	SunS_13_OVCAR3_HILIC_IntactGlycopeptide_F4.12578.12578.5.0.dta	5012.13	5	48.27	YHYNCSLLDGTQLFTSHDYGAPQEATLGANK	N2H7F0S0	7-2-0-0-0	0	0	1	0	0	0	1	27	b1/b2/b3/b4/b5/b7/b8/b9/b10/b11/	y1/y2/y3/y4/y5/y6/y7/y8/y9/y10/y11/y12/y13/y14/y15/y16/y17/	1540.53	3471.6	1334	5	5012.11	1	1	1
4	12580	SunS_13_OVCAR3_HILIC_IntactGlycopeptide_F4.12580.12580.5.0.dta	5393.35	5	48.27	FLKPYTLEEQKNLTVCPDGALFEQK	N5H6F1S1	6-5-1-1-0	-2	0	2	0	1	0	1	12	b2/b3/	y2/y3/y4/y5/y7/y9/y10/y11/y12/y13/	2424.87	2968.49	4417	5	5393.37	1	1	1
4	12593	SunS_13_OVCAR3_HILIC_IntactGlycopeptide_F4.12593.12593.5.0.dta	5832.55	5	48.31	FLKPYTLEEQKNLTVCPDGALFEQK	N7H8F1S0	8-7-0-1-0	-1	0	1	0	0	0	1	6		y1/y4/y5/y7/y9/y10/	2864.04	2968.52	#N/A	5	5833.52	0	1	0
4	12616	SunS_13_OVCAR3_HILIC_IntactGlycopeptide_F4.12616.12616.4.0.dta	5174.17	4	48.38	YHYNCSLLDGTQLFTSHDYGAPQEATLGANK	N2H8F0S0	8-2-0-0-0	-5	0	2	0	1	0	1	27	b1/b2/b3/b4/b5/b8/b9/b10/b11/b17/	y1/y2/y3/y4/y5/y6/y7/y8/y10/y11/y12/y13/y14/y15/y16/y17/y22/	1702.58	3471.59	#N/A	2	2588.08	0	1	0
4	12617	SunS_13_OVCAR3_HILIC_IntactGlycopeptide_F4.12617.12617.3.0.dta	5012.1	3	48.39	YHYNCSLLDGTQLFTSHDYGAPQEATLGANK	N2H7F0S0	7-2-0-0-0	-2	0	2	0	1	0	1	29	b2/b3/b4/b5/b6/b7/b8/b9/b10/b11/	y1/y2/y3/y4/y5/y6/y7/y8/y9/y10/y11/y12/y13/y14/y15/y16/y17/y18/y22/	1540.53	3471.57	2040	3	5012.11	1	1	1
4	12626	SunS_13_OVCAR3_HILIC_IntactGlycopeptide_F4.12626.12626.4.0.dta	4850.04	4	48.42	YHYNCSLLDGTQLFTSHDYGAPQEATLGANK	N2H6F0S0	6-2-0-0-0	-2	0	2	0	1	0	1	28	b2/b3/b4/b5/b7/b8/b9/b10/b11/	y1/y2/y3/y4/y5/y6/y7/y8/y9/y10/y11/y12/y13/y14/y15/y16/y17/y18/y22/	1378.48	3471.57	2192	4	4850.05	1	1	1
4	12629	SunS_13_OVCAR3_HILIC_IntactGlycopeptide_F4.12629.12629.5.0.dta	4850.03	5	48.42	YHYNCSLLDGTQLFTSHDYGAPQEATLGANK	N2H6F0S0	6-2-0-0-0	-2	0	1	0	0	0	1	21	b2/b3/b4/b5/b8/b9/b10/b11/	y1/y2/y3/y4/y5/y6/y7/y8/y10/y12/y13/y14/y17/	1378.48	3471.55	7033	5	4852.07	0	1	0
4	12685	SunS_13_OVCAR3_HILIC_IntactGlycopeptide_F4.12685.12685.4.0.dta	5393.35	4	48.57	FLKPYTLEEQKNLTVCPDGALFEQK	N5H6F1S1	6-5-1-1-0	-2	0	2	0	1	0	1	16	b2/b7/b8/b11/b13/	y2/y3/y4/y5/y6/y7/y9/y10/y11/y12/y13/	2424.87	2968.48	4415	4	5393.36	1	1	1
4	12687	SunS_13_OVCAR3_HILIC_IntactGlycopeptide_F4.12687.12687.5.0.dta	5393.36	5	48.57	FLKPYTLEEQKNLTVCPDGALFEQK	N5H6F1S1	6-5-1-1-0	-3	0	2	0	1	0	1	12	b2/b11/	y1/y2/y4/y5/y7/y9/y10/y11/y12/y13/	2424.87	2968.5	4530	5	5393.37	1	1	1
4	12690	SunS_13_OVCAR3_HILIC_IntactGlycopeptide_F4.12690.12690.4.0.dta	4188.86	4	48.58	VANLTEPVVLTFQHQLQPK	N2H10F0S0	10-2-0-0-0	-1	0	2	0	1	0	1	20	b2/b3/b4/b5/b6/b8/b12/	y1/y2/y4/y5/y6/y7/y8/y9/y10/y11/y13/y14/y15/	2026.69	2162.17	2078	4	4188.87	1	1	1
4	12691	SunS_13_OVCAR3_HILIC_IntactGlycopeptide_F4.12691.12691.4.0.dta	5012.1	4	48.58	YHYNCSLLDGTQLFTSHDYGAPQEATLGANK	N2H7F0S0	7-2-0-0-0	-2	0	1	0	0	0	1	13	b1/b2/b3/b9/b11/b27/	y4/y5/y7/y8/y10/y12/y13/	1540.53	3471.57	4797	4	5012.1	1	1	1
4	12692	SunS_13_OVCAR3_HILIC_IntactGlycopeptide_F4.12692.12692.4.0.dta	4687.99	4	48.58	YHYNCSLLDGTQLFTSHDYGAPQEATLGANK	N2H5F0S0	5-2-0-0-0	-2	0	1	0	1	0	0	12	b2/b3/b9/b11/	y1/y4/y5/y7/y8/y10/y11/y12/	1216.42	3471.57	#N/A	2	2345.51	0	1	0
4	12704	SunS_13_OVCAR3_HILIC_IntactGlycopeptide_F4.12704.12704.4.0.dta	5173.27	4	48.61	FLKPYTLEEQKNLTVCPDGALFEQK	N4H5F0S2	5-4-2-0-0	-1	0	2	0	1	0	1	23	b2/b5/b6/b7/b8/b9/b10/b11/b13/b15/	y1/y2/y3/y4/y5/y6/y7/y8/y9/y10/y11/y12/y13/	2204.77	2968.5	3848	4	5174.29	0	1	0
4	12707	SunS_13_OVCAR3_HILIC_IntactGlycopeptide_F4.12707.12707.3.0.dta	4026.81	3	48.62	VANLTEPVVLTFQHQLQPK	N2H9F0S0	9-2-0-0-0	-2	0	4	1	1	1	1	25	b2/b3/b4/b5/b6/b8/b9/b12/b17/	y1/y2/y3/y4/y5/y6/y7/y8/y9/y10/y11/y12/y13/y14/y15/y16/	1864.63	2162.18	1229	3	4026.81	1	1	1
4	12709	SunS_13_OVCAR3_HILIC_IntactGlycopeptide_F4.12709.12709.5.0.dta	5173.28	5	48.63	FLKPYTLEEQKNLTVCPDGALFEQK	N4H5F0S2	5-4-2-0-0	-5	0	2	0	1	0	1	25	b2/b3/b4/b5/b6/b7/b8/b9/b10/b11/b13/b15/	y1/y2/y3/y4/y5/y6/y7/y8/y9/y10/y11/y12/y13/	2204.77	2968.51	11879	5	5175.29	0	1	0
4	12719	SunS_13_OVCAR3_HILIC_IntactGlycopeptide_F4.12719.12719.3.0.dta	4188.87	3	48.65	VANLTEPVVLTFQHQLQPK	N2H10F0S0	10-2-0-0-0	-2	0	2	0	1	0	1	20	b2/b3/b4/b5/b6/b9/	y1/y2/y3/y4/y5/y6/y7/y8/y9/y10/y11/y13/y14/y15/	2026.69	2162.18	1342	3	4188.86	1	1	1
4	12723	SunS_13_OVCAR3_HILIC_IntactGlycopeptide_F4.12723.12723.4.0.dta	4089.68	4	48.66	HNNDTQHIWESDSNEFSVIADPR	N2H6F0S0	6-2-0-0-0	-2	0	1	0	0	0	1	7	b3/	y1/y2/y4/y5/y7/y8/	1378.48	2711.2	4541	4	4089.67	1	1	1
4	12734	SunS_13_OVCAR3_HILIC_IntactGlycopeptide_F4.12734.12734.4.0.dta	4026.82	4	48.69	VANLTEPVVLTFQHQLQPK	N2H9F0S0	9-2-0-0-0	-1	0	2	0	1	0	1	19	b2/b3/b4/b5/b6/b9/b12/	y2/y3/y5/y6/y7/y8/y9/y10/y11/y13/y14/y15/	1864.63	2162.19	2377	4	4026.8	1	1	1
4	12753	SunS_13_OVCAR3_HILIC_IntactGlycopeptide_F4.12753.12753.3.0.dta	3864.76	3	48.73	VANLTEPVVLTFQHQLQPK	N2H8F0S0	8-2-0-0-0	-2	0	4	1	1	1	1	24	b2/b3/b4/b5/b6/b8/b9/b12/b17/	y1/y2/y3/y4/y5/y6/y7/y8/y9/y10/y11/y12/y13/y14/y15/	1702.58	2162.18	1234	3	3864.76	1	1	1
4	12754	SunS_13_OVCAR3_HILIC_IntactGlycopeptide_F4.12754.12754.5.0.dta	5231.32	5	48.73	FLKPYTLEEQKNLTVCPDGALFEQK	N5H5F1S1	5-5-1-1-0	-3	0	2	0	1	0	1	11	b2/b8/	y2/y4/y5/y7/y9/y10/y11/y12/y13/	2262.81	2968.5	12508	5	5232.32	0	1	0
4	12764	SunS_13_OVCAR3_HILIC_IntactGlycopeptide_F4.12764.12764.4.0.dta	3864.76	4	48.76	VANLTEPVVLTFQHQLQPK	N2H8F0S0	8-2-0-0-0	-2	0	3	0	1	1	1	22	b2/b3/b4/b5/b6/b8/b12/	y1/y2/y3/y4/y5/y6/y7/y8/y9/y10/y11/y12/y13/y14/y15/	1702.58	2162.17	1187	4	3864.77	1	1	1
4	12769	SunS_13_OVCAR3_HILIC_IntactGlycopeptide_F4.12769.12769.4.0.dta	3702.72	4	48.77	VANLTEPVVLTFQHQLQPK	N2H7F0S0	7-2-0-0-0	-2	0	2	0	1	0	1	7	b4/b6/	y2/y8/y9/y10/y13/	1540.53	2162.19	#N/A	4	3703.71	0	1	0
4	12775	SunS_13_OVCAR3_HILIC_IntactGlycopeptide_F4.12775.12775.4.0.dta	5028.23	4	48.79	FLKPYTLEEQKNLTVCPDGALFEQK	N4H5F1S1	5-4-1-1-0	-3	0	2	0	1	0	1	25	b2/b3/b5/b6/b7/b8/b9/b10/b11/b14/b16/	y1/y2/y3/y4/y5/y6/y7/y8/y9/y10/y11/y12/y13/y14/	2059.73	2968.5	3388	4	5028.24	1	1	1
4	12776	SunS_13_OVCAR3_HILIC_IntactGlycopeptide_F4.12776.12776.5.0.dta	5028.24	5	48.79	FLKPYTLEEQKNLTVCPDGALFEQK	N4H5F1S1	5-4-1-1-0	-2	0	2	0	1	0	1	22	b2/b3/b5/b6/b7/b8/b9/b10/b11/	y1/y2/y3/y4/y5/y6/y7/y8/y9/y10/y11/y12/y13/	2059.73	2968.51	3714	5	5028.23	1	1	1
4	12810	SunS_13_OVCAR3_HILIC_IntactGlycopeptide_F4.12810.12810.3.0.dta	5028.23	3	48.87	FLKPYTLEEQKNLTVCPDGALFEQK	N4H5F1S1	5-4-1-1-0	-3	0	2	0	1	0	1	6		y2/y4/y7/y9/y10/y12/	2059.73	2968.5	4521	3	5028.25	1	1	1
4	12819	SunS_13_OVCAR3_HILIC_IntactGlycopeptide_F4.12819.12819.4.0.dta	5174.33	4	48.9	FLKPYTLEEQKNLTVCPDGALFEQK	N4H5F2S1	5-4-1-2-0	-2	0	2	0	1	0	1	11	b2/b9/	y1/y2/y4/y5/y7/y9/y10/y11/y12/	2205.79	2968.54	13655	4	5176.3	0	1	0
4	12858	SunS_13_OVCAR3_HILIC_IntactGlycopeptide_F4.12858.12858.4.0.dta	4825.16	4	49.01	FLKPYTLEEQKNLTVCPDGALFEQK	N3H5F1S1	5-3-1-1-0	-3	0	2	0	1	0	1	11	b8/b10/	y2/y4/y5/y7/y9/y10/y11/y12/y13/	1856.66	2968.5	5231	4	4825.15	1	1	1
4	12970	SunS_13_OVCAR3_HILIC_IntactGlycopeptide_F4.12970.12970.3.0.dta	3899.71	3	49.34	GLVMNYPHITNLTNLGQSTEYR	N2H6F0S0	6-2-0-0-0	-2	0	2	0	1	0	1	22	b2/b3/b4/b5/b6/b8/b9/b10/b12/b15/	y1/y2/y4/y5/y6/y7/y8/y9/y10/y11/y13/y16/	1378.48	2521.23	3870	3	3899.72	1	0	0
4	12995	SunS_13_OVCAR3_HILIC_IntactGlycopeptide_F4.12995.12995.4.0.dta	3899.71	4	49.42	GLVMNYPHITNLTNLGQSTEYR	N2H6F0S0	6-2-0-0-0	-3	0	2	0	1	0	1	15	b2/b3/b8/b9/b10/b12/	y1/y2/y4/y5/y6/y7/y8/y9/y10/	1378.48	2521.24	3188	4	3899.74	1	0	0
4	13007	SunS_13_OVCAR3_HILIC_IntactGlycopeptide_F4.13007.13007.3.0.dta	3879.74	3	49.45	VPENITLYTPILHTQAR	N4H5F0S1	5-4-1-0-0	-2	0	3	0	1	1	1	9		y1/y4/y5/y6/y8/y9/y10/y11/y12/	1913.68	1966.06	1964	3	3879.76	1	1	1
4	13050	SunS_13_OVCAR3_HILIC_IntactGlycopeptide_F4.13050.13050.3.0.dta	3774.51	3	49.59	TLNSSGLPFGSYTFEK	N2H10F0S0	10-2-0-0-0	-2	0	2	1	0	1	0	11	b2/b7/	y1/y4/y5/y7/y9/y10/y11/y12/y13/	2026.69	1747.83	2063	3	3774.53	1	1	1
4	13052	SunS_13_OVCAR3_HILIC_IntactGlycopeptide_F4.13052.13052.4.0.dta	3673.58	4	49.59	TNSTFVQALVEHVK	N5H4F1S1	4-5-1-1-0	-2	0	4	1	1	1	1	15	b2/b3/b7/	y1/y2/y3/y4/y5/y6/y7/y8/y9/y10/y11/y12/	2100.76	1572.82	2782	4	3673.59	1	1	1
4	13097	SunS_13_OVCAR3_HILIC_IntactGlycopeptide_F4.13097.13097.4.0.dta	3470.51	4	49.72	TNSTFVQALVEHVK	N4H4F1S1	4-4-1-1-0	-2	0	4	1	1	1	1	14	b1/b2/b3/b7/	y2/y3/y4/y5/y6/y7/y8/y9/y10/y12/	1897.68	1572.83	1565	4	3470.51	1	1	1
4	13098	SunS_13_OVCAR3_HILIC_IntactGlycopeptide_F4.13098.13098.3.0.dta	3470.49	3	49.73	TNSTFVQALVEHVK	N4H4F1S1	4-4-1-1-0	-1	0	4	1	1	1	1	16	b2/b3/b7/b13/	y1/y2/y3/y4/y5/y6/y7/y8/y9/y10/y11/y12/	1897.68	1572.81	1895	3	3470.52	1	1	1
4	13143	SunS_13_OVCAR3_HILIC_IntactGlycopeptide_F4.13143.13143.3.0.dta	3267.43	3	49.87	TNSTFVQALVEHVK	N3H4F1S1	4-3-1-1-0	-1	0	4	1	1	1	1	17	b2/b3/b7/b8/b9/	y1/y2/y3/y4/y5/y6/y7/y8/y9/y10/y11/y12/	1694.6	1572.82	1851	3	3267.44	1	1	1
4	13148	SunS_13_OVCAR3_HILIC_IntactGlycopeptide_F4.13148.13148.4.0.dta	3267.43	4	49.89	TNSTFVQALVEHVK	N3H4F1S1	4-3-1-1-0	-1	0	4	1	1	1	1	16	b2/b3/b5/b7/	y1/y2/y3/y4/y5/y6/y7/y8/y9/y10/y11/y12/	1694.6	1572.83	996	4	3267.44	1	1	1
4	13163	SunS_13_OVCAR3_HILIC_IntactGlycopeptide_F4.13163.13163.5.0.dta	5077.15	5	49.94	VSLEHLLSYPQNFSCVHHALR	N5H6F0S2	6-5-2-0-0	-3	0	2	0	1	0	1	11	b5/b6/b7/b8/b9/	y1/y3/y4/y5/y7/y9/	2569.9	2507.24	#N/A	5	5077.16	1	1	1
4	13246	SunS_13_OVCAR3_HILIC_IntactGlycopeptide_F4.13246.13246.5.0.dta	5077.16	5	50.21	VSLEHLLSYPQNFSCVHHALR	N5H6F0S2	6-5-2-0-0	-2	0	1	0	0	0	1	7	b2/b6/b7/b9/	y4/y5/y8/	2569.9	2507.25	11016	5	5077.16	1	1	1
4	13256	SunS_13_OVCAR3_HILIC_IntactGlycopeptide_F4.13256.13256.3.0.dta	3129.25	3	50.25	DIYTFDGALNK	N3H6F0S1	6-3-1-0-0	-2	0	2	1	0	1	0	6	b3/b4/b8/b9/	y1/y5/	1872.65	1256.6	4018	3	3129.26	1	1	1
4	13343	SunS_13_OVCAR3_HILIC_IntactGlycopeptide_F4.13343.13343.3.0.dta	3200.3	3	50.51	ANNSWFQSILR	N2H9F0S0	9-2-0-0-0	-1	0	4	1	1	1	1	12	b2/b3/b4/	y1/y2/y3/y4/y5/y6/y7/y8/y9/	1864.63	1335.67	245	3	3200.3	1	1	1
4	13375	SunS_13_OVCAR3_HILIC_IntactGlycopeptide_F4.13375.13375.3.0.dta	3038.25	3	50.62	ANNSWFQSILR	N2H8F0S0	8-2-0-0-0	-1	0	4	1	1	1	1	11	b3/b5/	y1/y2/y3/y4/y5/y6/y7/y8/y9/	1702.58	1335.67	204	3	3038.26	1	1	1
4	13451	SunS_13_OVCAR3_HILIC_IntactGlycopeptide_F4.13451.13451.3.0.dta	3701.62	3	50.85	VFPYISVMVNNGSLSYDHSK	N4H3F1S0	3-4-0-1-0	-1	0	3	0	1	1	1	15	b2/b3/b4/b7/	y1/y2/y3/y4/y5/y6/y7/y8/y9/y10/y11/	1444.53	2257.09	11427	3	3701.63	1	0	0
4	13461	SunS_13_OVCAR3_HILIC_IntactGlycopeptide_F4.13461.13461.3.0.dta	3816.66	3	50.89	GVTNDLLSIQGNTGPSWINK	N2H8F0S0	8-2-0-0-0	-1	0	4	1	1	1	1	19	b2/b3/b5/b6/b7/b8/b9/b10/b14/	y1/y2/y3/y6/y7/y8/y10/y11/y12/y13/	1702.58	2114.08	8918	3	3815.65	0	1	0
4	13569	SunS_13_OVCAR3_HILIC_IntactGlycopeptide_F4.13569.13569.5.0.dta	5580.41	5	51.24	VIFITANEANHNSNTTTDEHGLAQFSITTTK	N4H5F0S2	5-4-2-0-0	-3	0	2	0	1	0	1	15	b2/b3/b11/b13/	y2/y3/y4/y5/y6/y7/y8/y9/y10/y11/y13/	2204.77	3375.63	6385	5	5580.43	1	1	1
4	13575	SunS_13_OVCAR3_HILIC_IntactGlycopeptide_F4.13575.13575.4.0.dta	5580.43	4	51.27	VIFITANEANHNSNTTTDEHGLAQFSITTTK	N4H5F0S2	5-4-2-0-0	-3	0	2	0	1	0	1	10	b2/b3/b12/	y2/y3/y4/y6/y8/y9/y11/	2204.77	3375.66	7162	4	5580.41	1	1	1
4	13632	SunS_13_OVCAR3_HILIC_IntactGlycopeptide_F4.13632.13632.4.0.dta	4452.83	4	51.43	DAQQDYHLEYAMENSTHTIIEFTR	N2H7F0S0	7-2-0-0-0	0	0	2	0	1	0	1	10	b2/b3/b7/b8/	y1/y3/y4/y5/y6/y7/	1540.53	2912.3	#N/A	4	4453.84	0	1	0
4	13795	SunS_13_OVCAR3_HILIC_IntactGlycopeptide_F4.13795.13795.3.0.dta	3786.59	3	52	GQFFPSEDLQEQIYLNR	N2H8F0S0	8-2-0-0-0	-2	0	2	1	0	1	0	10	b2/b3/b4/b9/b13/	y1/y3/y4/y8/y13/	1702.58	2084.01	3584	3	3786.59	1	1	1
4	13804	SunS_13_OVCAR3_HILIC_IntactGlycopeptide_F4.13804.13804.4.0.dta	4438.83	4	52.03	KLCPDCPLLAPLNDSR	N5H6F0S2	6-5-2-0-0	0	0	4	1	1	1	1	6	b1/b3/b5/b10/	y1/y2/	2569.9	1868.92	8909	4	4438.83	1	1	1
4	13939	SunS_13_OVCAR3_HILIC_IntactGlycopeptide_F4.13939.13939.3.0.dta	3861.77	3	52.49	TGEANLTQIYLQEALDFIK	N3H4F1S1	4-3-1-1-0	0	0	3	1	1	0	1	6	b3/b4/b11/b13/	y1/y11/	1694.6	2167.17	12942	3	3861.76	1	1	1
4	13988	SunS_13_OVCAR3_HILIC_IntactGlycopeptide_F4.13988.13988.3.0.dta	4438.84	3	52.64	KLCPDCPLLAPLNDSR	N5H6F0S2	6-5-2-0-0	0	0	4	1	1	1	1	8	b1/b3/b5/b9/b10/	y1/y2/y13/	2569.9	1868.93	4339	3	4438.83	1	1	1
4	14026	SunS_13_OVCAR3_HILIC_IntactGlycopeptide_F4.14026.14026.4.0.dta	4073.71	4	52.77	KLCPDCPLLAPLNDSR	N4H5F0S2	5-4-2-0-0	0	0	4	1	1	1	1	11	b1/b2/b3/b5/b6/b8/b9/b10/	y1/y2/y6/	2204.77	1868.94	12440	4	4073.7	1	1	1
4	14117	SunS_13_OVCAR3_HILIC_IntactGlycopeptide_F4.14117.14117.4.0.dta	4438.83	4	53.1	KLCPDCPLLAPLNDSR	N5H6F0S2	6-5-2-0-0	-2	0	2	0	0	1	1	8	b1/b3/b5/b6/b9/b10/	y1/y2/	2569.9	1868.92	#N/A	4	4438.82	1	1	1
4	14156	SunS_13_OVCAR3_HILIC_IntactGlycopeptide_F4.14156.14156.3.0.dta	4073.69	3	53.21	KLCPDCPLLAPLNDSR	N4H5F0S2	5-4-2-0-0	-1	0	3	0	1	1	1	8	b1/b3/b5/b6/b9/b10/	y1/y2/	2204.77	1868.91	6738	3	4073.69	1	1	1
4	14166	SunS_13_OVCAR3_HILIC_IntactGlycopeptide_F4.14166.14166.4.0.dta	4165.7	4	53.24	LCPDCPLLAPLNDSR	N5H6F1S1	6-5-1-1-0	0	0	2	1	0	1	0	6	b2/b7/b8/b9/	y1/y2/	2424.87	1740.84	#N/A	4	4165.7	1	1	1
4	14177	SunS_13_OVCAR3_HILIC_IntactGlycopeptide_F4.14177.14177.4.0.dta	4073.7	4	53.29	KLCPDCPLLAPLNDSR	N4H5F0S2	5-4-2-0-0	0	0	4	1	1	1	1	14	b1/b2/b3/b5/b6/b8/b9/b10/	y1/y2/y3/y6/y7/y13/	2204.77	1868.93	#N/A	2	2037.35	0	1	0
4	14185	SunS_13_OVCAR3_HILIC_IntactGlycopeptide_F4.14185.14185.4.0.dta	6020.33	4	53.31	SCGECIQAGPNCGWCTNSTFLQEGMPTSAR	N6H7F0S1	7-6-1-0-0	-3	0	1	0	0	0	1	7	b7/	y1/y5/y7/y8/y9/y10/	2643.94	3376.39	#N/A	4	6020.31	1	0	0
4	14261	SunS_13_OVCAR3_HILIC_IntactGlycopeptide_F4.14261.14261.4.0.dta	4165.7	4	53.55	LCPDCPLLAPLNDSR	N5H6F1S1	6-5-1-1-0	0	0	3	1	0	1	1	9	b2/b5/b6/b7/b8/b9/	y1/y2/y6/	2424.87	1740.83	3948	4	4165.7	1	1	1
4	14303	SunS_13_OVCAR3_HILIC_IntactGlycopeptide_F4.14303.14303.3.0.dta	4019.63	3	53.66	LCPDCPLLAPLNDSR	N5H6F0S1	6-5-1-0-0	0	0	4	1	1	1	1	16	b2/b3/b4/b5/b6/b7/b8/b9/	y1/y2/y3/y6/y7/y10/y11/y13/	2278.81	1740.82	4507	3	4019.64	1	1	1
4	14309	SunS_13_OVCAR3_HILIC_IntactGlycopeptide_F4.14309.14309.4.0.dta	4019.63	4	53.68	LCPDCPLLAPLNDSR	N5H6F0S1	6-5-1-0-0	0	0	4	1	1	1	1	20	b2/b3/b4/b5/b6/b7/b8/b9/b10/b11/b13/	y1/y2/y3/y6/y7/y8/y10/y11/y13/	2278.81	1740.82	4812	4	4019.65	1	1	1
4	14347	SunS_13_OVCAR3_HILIC_IntactGlycopeptide_F4.14347.14347.4.0.dta	4165.71	4	53.81	LCPDCPLLAPLNDSR	N5H6F1S1	6-5-1-1-0	0	0	3	1	0	1	1	8	b2/b5/b7/b8/b9/	y2/y3/y7/	2424.87	1740.84	6500	4	4165.7	1	1	1
4	14391	SunS_13_OVCAR3_HILIC_IntactGlycopeptide_F4.14391.14391.4.0.dta	4019.63	4	53.96	LCPDCPLLAPLNDSR	N5H6F0S1	6-5-1-0-0	-2	0	4	1	1	1	1	14	b2/b3/b4/b5/b6/b7/b8/b9/	y1/y2/y3/y6/y7/y13/	2278.81	1740.82	3869	4	4019.65	1	1	1
4	14454	SunS_13_OVCAR3_HILIC_IntactGlycopeptide_F4.14454.14454.4.0.dta	3654.51	4	54.17	LCPDCPLLAPLNDSR	N4H5F0S1	5-4-1-0-0	-2	0	2	1	0	1	0	10	b2/b4/b5/b6/b7/b8/b9/	y1/y2/y6/	1913.68	1740.83	6927	4	3654.51	1	1	1
4	14460	SunS_13_OVCAR3_HILIC_IntactGlycopeptide_F4.14460.14460.4.0.dta	3800.57	4	54.19	LCPDCPLLAPLNDSR	N4H5F1S1	5-4-1-1-0	-2	0	4	1	1	1	1	12	b2/b3/b4/b5/b7/b8/b9/	y1/y2/y3/y7/y13/	2059.73	1740.84	5866	4	3800.56	1	1	1
4	14479	SunS_13_OVCAR3_HILIC_IntactGlycopeptide_F4.14479.14479.4.0.dta	4019.64	4	54.24	LCPDCPLLAPLNDSR	N5H6F0S1	6-5-1-0-0	0	0	4	1	1	1	1	17	b2/b3/b4/b5/b6/b7/b8/b9/	y1/y2/y3/y6/y7/y8/y10/y11/y13/	2278.81	1740.83	4804	4	4019.64	1	1	1
4	14480	SunS_13_OVCAR3_HILIC_IntactGlycopeptide_F4.14480.14480.3.0.dta	4019.64	3	54.24	LCPDCPLLAPLNDSR	N5H6F0S1	6-5-1-0-0	0	0	4	1	1	1	1	14	b2/b3/b5/b6/b7/b8/b9/	y1/y2/y3/y6/y7/y11/y13/	2278.81	1740.83	4963	3	4019.64	1	1	1
4	14493	SunS_13_OVCAR3_HILIC_IntactGlycopeptide_F4.14493.14493.3.0.dta	3800.55	3	54.28	LCPDCPLLAPLNDSR	N4H5F1S1	5-4-1-1-0	0	0	3	1	0	1	1	11	b2/b4/b5/b7/b8/b9/	y1/y2/y3/y6/y13/	2059.73	1740.81	4919	3	3800.56	1	1	1
4	14520	SunS_13_OVCAR3_HILIC_IntactGlycopeptide_F4.14520.14520.4.0.dta	3480.5	4	54.37	KTYAIYDLLDTAMINNSR	N2H6F0S0	6-2-0-0-0	-3	0	2	0	1	0	1	11	b1/b4/b5/b6/b7/b8/b9/b10/	y1/y2/y3/	1378.48	2102.03	3987	4	3480.52	1	0	0
4	14541	SunS_13_OVCAR3_HILIC_IntactGlycopeptide_F4.14541.14541.3.0.dta	3654.5	3	54.43	LCPDCPLLAPLNDSR	N4H5F0S1	5-4-1-0-0	0	0	4	1	1	1	1	19	b2/b3/b4/b5/b6/b7/b8/b9/b11/b13/	y1/y2/y3/y6/y7/y8/y10/y11/y13/	1913.68	1740.82	5022	3	3654.51	1	1	1
4	14542	SunS_13_OVCAR3_HILIC_IntactGlycopeptide_F4.14542.14542.4.0.dta	3654.49	4	54.43	LCPDCPLLAPLNDSR	N4H5F0S1	5-4-1-0-0	0	0	4	1	1	1	1	17	b2/b3/b4/b5/b6/b7/b8/b9/	y1/y2/y3/y6/y7/y8/y10/y11/y13/	1913.68	1740.82	4953	4	3654.51	1	1	1
4	14608	SunS_13_OVCAR3_HILIC_IntactGlycopeptide_F4.14608.14608.5.0.dta	5368.24	5	54.64	VSLEHLLSYPQNFSCVHHALR	N5H6F0S3	6-5-3-0-0	-2	0	3	0	1	1	1	12	b5/b6/b7/b8/b9/	y1/y2/y3/y4/y5/y7/y8/	2861	2507.24	#N/A	5	5368.25	1	1	1
4	14617	SunS_13_OVCAR3_HILIC_IntactGlycopeptide_F4.14617.14617.3.0.dta	3654.5	3	54.68	LCPDCPLLAPLNDSR	N4H5F0S1	5-4-1-0-0	0	0	4	1	1	1	1	18	b2/b3/b4/b5/b6/b7/b8/b9/b11/	y1/y2/y3/y6/y7/y8/y10/y11/y13/	1913.68	1740.82	5145	3	3654.51	1	1	1
4	14621	SunS_13_OVCAR3_HILIC_IntactGlycopeptide_F4.14621.14621.4.0.dta	3654.53	4	54.69	LCPDCPLLAPLNDSR	N4H5F0S1	5-4-1-0-0	0	0	4	1	1	1	1	17	b2/b3/b4/b5/b6/b7/b8/b9/b10/	y1/y2/y3/y6/y7/y10/y11/y13/	1913.68	1740.85	8216	4	3654.51	1	1	1
4	14628	SunS_13_OVCAR3_HILIC_IntactGlycopeptide_F4.14628.14628.3.0.dta	3318.47	3	54.71	KTYAIYDLLDTAMINNSR	N2H5F0S0	5-2-0-0-0	-1	0	2	0	1	0	1	9	b1/b2/b5/b6/b7/b8/b10/	y2/y3/	1216.42	2102.05	3052	3	3318.47	1	0	0
4	14666	SunS_13_OVCAR3_HILIC_IntactGlycopeptide_F4.14666.14666.4.0.dta	5368.24	4	54.82	VSLEHLLSYPQNFSCVHHALR	N5H6F0S3	6-5-3-0-0	-3	0	3	0	1	1	1	10	b5/b6/b7/b9/	y1/y3/y4/y5/y7/y8/	2861	2507.24	#N/A	2	2685.13	0	1	0
4	14692	SunS_13_OVCAR3_HILIC_IntactGlycopeptide_F4.14692.14692.5.0.dta	5368.25	5	54.89	VSLEHLLSYPQNFSCVHHALR	N5H6F0S3	6-5-3-0-0	-2	0	3	0	1	1	1	12	b5/b6/b7/b8/b9/	y1/y3/y4/y5/y7/y8/y9/	2861	2507.25	#N/A	5	5368.25	1	1	1
4	14702	SunS_13_OVCAR3_HILIC_IntactGlycopeptide_F4.14702.14702.4.0.dta	3729.63	4	54.92	GLGFNLTELAEAEIHK	N5H6F0S0	6-5-0-0-0	-1	0	4	1	1	1	1	9		y1/y2/y3/y6/y7/y8/y9/y10/y11/	1987.71	1741.91	886	4	3729.61	1	1	1
4	14707	SunS_13_OVCAR3_HILIC_IntactGlycopeptide_F4.14707.14707.3.0.dta	3654.5	3	54.94	LCPDCPLLAPLNDSR	N4H5F0S1	5-4-1-0-0	0	0	4	1	1	1	1	17	b2/b3/b4/b5/b6/b7/b8/b9/	y1/y2/y3/y6/y7/y8/y10/y11/y13/	1913.68	1740.82	5197	3	3654.51	1	1	1
4	14709	SunS_13_OVCAR3_HILIC_IntactGlycopeptide_F4.14709.14709.4.0.dta	3654.5	4	54.95	LCPDCPLLAPLNDSR	N4H5F0S1	5-4-1-0-0	-1	0	4	1	1	1	1	16	b2/b3/b4/b5/b6/b7/b8/b9/	y1/y2/y3/y6/y7/y8/y10/y13/	1913.68	1740.82	3825	4	3654.51	1	1	1
4	14776	SunS_13_OVCAR3_HILIC_IntactGlycopeptide_F4.14776.14776.4.0.dta	3654.51	4	55.21	LCPDCPLLAPLNDSR	N4H5F0S1	5-4-1-0-0	0	0	3	1	0	1	1	9	b2/b3/b4/b5/b7/b8/b9/	y2/y6/	1913.68	1740.83	5441	4	3654.52	1	1	1
4	14825	SunS_13_OVCAR3_HILIC_IntactGlycopeptide_F4.14825.14825.3.0.dta	3654.49	3	55.46	LCPDCPLLAPLNDSR	N4H5F0S1	5-4-1-0-0	-1	0	2	1	0	1	0	6	b2/b5/b7/b8/b9/	y2/	1913.68	1740.81	7257	3	3654.51	1	1	1
4	14887	SunS_13_OVCAR3_HILIC_IntactGlycopeptide_F4.14887.14887.3.0.dta	3654.51	3	55.73	LCPDCPLLAPLNDSR	N4H5F0S1	5-4-1-0-0	0	0	2	1	0	1	0	7	b2/b5/b8/b9/	y1/y2/y3/	1913.68	1740.84	4225	3	3654.52	1	1	1
4	14893	SunS_13_OVCAR3_HILIC_IntactGlycopeptide_F4.14893.14893.4.0.dta	3654.5	4	55.75	LCPDCPLLAPLNDSR	N4H5F0S1	5-4-1-0-0	-1	0	3	1	0	1	1	7	b2/b3/b5/b7/b8/b9/	y2/	1913.68	1740.83	7317	4	3654.52	1	1	1
4	14926	SunS_13_OVCAR3_HILIC_IntactGlycopeptide_F4.14926.14926.5.0.dta	5659.5	5	55.88	RPTGEVYDIEIDTLETTCHVLDPTPLANCSVR	N5H6F0S0	6-5-0-0-0	-3	0	1	0	0	0	1	15	b2/b5/b6/b8/b9/b10/b11/b12/b15/b22/	y1/y3/y4/y10/y17/	1987.71	3671.79	#N/A	5	5660.5	0	1	0
4	14931	SunS_13_OVCAR3_HILIC_IntactGlycopeptide_F4.14931.14931.3.0.dta	4648.95	3	55.9	TGPVVEDSGSLLLEYVNGSACTTSDGR	N2H9F0S0	9-2-0-0-0	-2	0	1	0	1	0	0	25	b2/b3/b4/b5/b6/b7/b10/b11/b12/b13/b14/b16/	y1/y2/y3/y4/y5/y6/y7/y8/y9/y10/y11/y13/y14/	1864.63	2784.31	247	3	4648.93	1	1	1
4	14934	SunS_13_OVCAR3_HILIC_IntactGlycopeptide_F4.14934.14934.4.0.dta	5173.12	4	55.91	YAIQYFNNNTSHSHLFDLK	N5H6F0S3	6-5-3-0-0	-2	0	4	1	1	1	1	9	b2/b4/b6/	y1/y2/y4/y6/y7/y10/	2861	2312.12	#N/A	4	5175.1	0	1	0
4	14984	SunS_13_OVCAR3_HILIC_IntactGlycopeptide_F4.14984.14984.5.0.dta	5659.47	5	56.14	RPTGEVYDIEIDTLETTCHVLDPTPLANCSVR	N5H6F0S0	6-5-0-0-0	-3	0	1	0	0	0	1	15	b2/b6/b7/b8/b9/b10/b11/b12/b15/b22/	y1/y3/y4/y10/y17/	1987.71	3671.75	12492	5	5660.5	0	1	0
4	15012	SunS_13_OVCAR3_HILIC_IntactGlycopeptide_F4.15012.15012.4.0.dta	5294.36	4	56.24	RPTGEVYDIEIDTLETTCHVLDPTPLANCSVR	N4H5F0S0	5-4-0-0-0	-3	0	2	0	1	0	1	17	b1/b2/b6/b7/b8/b9/b10/b11/b12/b14/b15/b22/	y1/y3/y4/y10/y17/	1622.58	3671.78	7369	4	5294.35	1	1	1
4	15020	SunS_13_OVCAR3_HILIC_IntactGlycopeptide_F4.15020.15020.3.0.dta	3654.52	3	56.27	LCPDCPLLAPLNDSR	N4H5F0S1	5-4-1-0-0	0	0	2	0	0	1	1	6	b2/b7/b9/	y1/y2/y13/	1913.68	1740.84	5564	3	3654.52	1	1	1
4	15038	SunS_13_OVCAR3_HILIC_IntactGlycopeptide_F4.15038.15038.3.0.dta	3667.59	3	56.34	LSALDNLLNHSSMFLK	N2H9F0S0	9-2-0-0-0	0	0	4	1	1	1	1	14	b2/b3/b4/b5/b6/b7/	y1/y2/y3/y4/y5/y6/y7/y8/	1864.63	1802.96	#N/A	3	3667.59	1	0	0
4	15042	SunS_13_OVCAR3_HILIC_IntactGlycopeptide_F4.15042.15042.3.0.dta	3505.54	3	56.35	LSALDNLLNHSSMFLK	N2H8F0S0	8-2-0-0-0	0	0	4	1	1	1	1	8	b5/	y1/y2/y3/y4/y5/y6/y7/	1702.58	1802.96	#N/A	3	3505.54	1	0	0
4	15075	SunS_13_OVCAR3_HILIC_IntactGlycopeptide_F4.15075.15075.3.0.dta	3343.49	3	56.49	LSALDNLLNHSSMFLK	N2H7F0S0	7-2-0-0-0	-1	0	4	1	1	1	1	11	b2/b3/b7/b10/	y1/y2/y3/y5/y6/y7/y9/	1540.53	1802.96	8247	3	3343.48	1	0	0
4	15103	SunS_13_OVCAR3_HILIC_IntactGlycopeptide_F4.15103.15103.3.0.dta	3505.52	3	56.61	LSALDNLLNHSSMFLK	N2H8F0S0	8-2-0-0-0	0	0	4	1	1	1	1	21	b2/b3/b5/b6/b7/b8/b10/b13/b14/b15/	y1/y2/y3/y4/y5/y6/y7/y8/y9/y11/y12/	1702.58	1802.94	12443	3	3505.53	1	0	0
4	15104	SunS_13_OVCAR3_HILIC_IntactGlycopeptide_F4.15104.15104.3.0.dta	3181.43	3	56.61	LSALDNLLNHSSMFLK	N2H6F0S0	6-2-0-0-0	0	0	4	1	1	1	1	19	b2/b3/b4/b5/b6/b7/b8/b10/b13/	y1/y2/y3/y4/y5/y6/y7/y8/y9/y11/	1378.48	1802.95	#N/A	3	3181.43	1	0	0
4	15115	SunS_13_OVCAR3_HILIC_IntactGlycopeptide_F4.15115.15115.4.0.dta	4898.07	4	56.65	DVTVIEGEVATISCQVNK	N6H7F2S1	7-6-1-2-0	-2	0	2	1	0	1	0	6	b4/b5/b6/b9/b10/	y6/	2936.06	1962.01	8269	4	4898.04	1	1	1
4	15138	SunS_13_OVCAR3_HILIC_IntactGlycopeptide_F4.15138.15138.3.0.dta	3343.47	3	56.75	LSALDNLLNHSSMFLK	N2H7F0S0	7-2-0-0-0	-2	0	4	1	1	1	1	14	b2/b3/b4/b5/b6/b7/	y1/y2/y3/y5/y6/y7/y8/y9/	1540.53	1802.94	9306	3	3343.48	1	0	0
4	15179	SunS_13_OVCAR3_HILIC_IntactGlycopeptide_F4.15179.15179.3.0.dta	3505.52	3	56.89	LSALDNLLNHSSMFLK	N2H8F0S0	8-2-0-0-0	0	0	4	1	1	1	1	11	b3/b7/b10/	y1/y2/y3/y4/y5/y6/y7/y9/	1702.58	1802.94	#N/A	3	3505.53	1	0	0
4	15309	SunS_13_OVCAR3_HILIC_IntactGlycopeptide_F4.15309.15309.3.0.dta	3453.47	3	57.34	DYYPINESLASLPLR	N2H8F0S0	8-2-0-0-0	-1	0	2	1	0	1	0	14	b2/b3/b4/b10/	y1/y3/y4/y5/y6/y7/y8/y9/y10/y12/	1702.58	1750.89	1497	3	3453.47	1	1	1
4	15418	SunS_13_OVCAR3_HILIC_IntactGlycopeptide_F4.15418.15418.3.0.dta	3129.38	3	57.74	DYYPINESLASLPLR	N2H6F0S0	6-2-0-0-0	-1	0	2	1	0	1	0	13	b2/b3/b7/	y1/y3/y4/y5/y6/y7/y8/y9/y12/y14/	1378.48	1750.91	544	3	3129.38	1	1	1
4	15534	SunS_13_OVCAR3_HILIC_IntactGlycopeptide_F4.15534.15534.4.0.dta	4362.88	4	58.21	ILAPAYFILGGNQSGEGCVITR	N2H10F0S0	10-2-0-0-0	0	0	2	0	1	0	1	24	b2/b3/b4/b5/b6/b7/b8/b9/b10/b13/	y1/y2/y3/y4/y5/y6/y7/y8/y9/y10/y12/y13/y14/y15/	2026.69	2336.2	272	4	4362.91	1	1	1
4	15543	SunS_13_OVCAR3_HILIC_IntactGlycopeptide_F4.15543.15543.3.0.dta	4362.88	3	58.25	ILAPAYFILGGNQSGEGCVITR	N2H10F0S0	10-2-0-0-0	-2	0	1	0	0	0	1	22	b2/b3/b4/b5/b6/b7/b8/b9/b11/	y1/y2/y3/y4/y5/y6/y8/y9/y10/y12/y13/y14/y15/	2026.69	2336.2	804	3	4362.9	1	1	1
4	15812	SunS_13_OVCAR3_HILIC_IntactGlycopeptide_F4.15812.15812.3.0.dta	3820.75	3	59.43	DVVTAAGDMLKDNATEEEILVYLEK	N2H4F0S0	4-2-0-0-0	-1	0	2	0	1	0	1	21	b2/b3/b4/b5/b6/b7/b8/b14/	y1/y2/y3/y4/y5/y6/y7/y8/y9/y10/y11/y12/y13/	1054.37	2766.38	1051	3	3820.75	1	0	0
4	15817	SunS_13_OVCAR3_HILIC_IntactGlycopeptide_F4.15817.15817.4.0.dta	3820.76	4	59.45	DVVTAAGDMLKDNATEEEILVYLEK	N2H4F0S0	4-2-0-0-0	0	0	2	0	1	0	1	22	b2/b3/b4/b5/b6/b7/b8/b12/b18/	y1/y2/y3/y4/y5/y6/y7/y8/y9/y10/y11/y12/y14/	1054.37	2766.39	795	4	3820.76	1	0	0
4	15828	SunS_13_OVCAR3_HILIC_IntactGlycopeptide_F4.15828.15828.4.0.dta	5371.29	4	59.5	KDSLNSSHPISSSVQSSEQIEEMFDSLSYFK	N2H9F0S0	9-2-0-0-0	-3	0	2	0	1	0	1	16	b1/b8/b10/	y1/y2/y3/y4/y5/y6/y7/y8/y9/y10/y11/y12/y13/	1864.63	3506.66	11063	4	5371.27	1	0	0
4	15842	SunS_13_OVCAR3_HILIC_IntactGlycopeptide_F4.15842.15842.4.0.dta	5209.2	4	59.57	KDSLNSSHPISSSVQSSEQIEEMFDSLSYFK	N2H8F0S0	8-2-0-0-0	-3	0	1	0	0	0	1	12	b1/	y1/y2/y3/y4/y6/y7/y8/y9/y10/y11/y12/	1702.58	3506.62	7762	4	5209.21	1	0	0
4	15866	SunS_13_OVCAR3_HILIC_IntactGlycopeptide_F4.15866.15866.3.0.dta	3820.74	3	59.69	DVVTAAGDMLKDNATEEEILVYLEK	N2H4F0S0	4-2-0-0-0	0	0	2	0	1	0	1	20	b2/b3/b4/b5/b6/b8/b12/b14/	y1/y2/y3/y4/y5/y6/y7/y8/y9/y10/y11/y12/	1054.37	2766.37	1319	3	3820.74	1	0	0
4	15867	SunS_13_OVCAR3_HILIC_IntactGlycopeptide_F4.15867.15867.5.0.dta	5950.56	5	59.69	RPTGEVYDIEIDTLETTCHVLDPTPLANCSVR	N5H6F0S1	6-5-1-0-0	-3	0	1	0	0	0	1	14	b2/b5/b7/b8/b9/b10/b11/b12/b14/b15/b22/	y1/y4/y10/	2278.81	3671.75	13179	5	5951.57	0	1	0
4	15873	SunS_13_OVCAR3_HILIC_IntactGlycopeptide_F4.15873.15873.4.0.dta	3820.74	4	59.72	DVVTAAGDMLKDNATEEEILVYLEK	N2H4F0S0	4-2-0-0-0	-2	0	2	0	1	0	1	22	b2/b3/b4/b5/b6/b7/b8/b12/	y1/y2/y3/y4/y5/y6/y7/y8/y9/y10/y11/y12/y13/y14/	1054.37	2766.37	989	4	3820.74	1	0	0
4	15882	SunS_13_OVCAR3_HILIC_IntactGlycopeptide_F4.15882.15882.4.0.dta	5950.57	4	59.75	RPTGEVYDIEIDTLETTCHVLDPTPLANCSVR	N5H6F0S1	6-5-1-0-0	-4	0	1	0	0	0	1	13	b2/b5/b8/b9/b10/b11/b12/b15/b22/	y1/y4/y10/y17/	2278.81	3671.76	#N/A	2	2975.79	0	1	0
4	15884	SunS_13_OVCAR3_HILIC_IntactGlycopeptide_F4.15884.15884.4.0.dta	5371.24	4	59.76	KDSLNSSHPISSSVQSSEQIEEMFDSLSYFK	N2H9F0S0	9-2-0-0-0	-3	0	1	0	0	0	1	14	b1/b8/	y1/y2/y3/y4/y5/y6/y7/y8/y9/y10/y11/y12/	1864.63	3506.6	#N/A	2	2686.63	0	1	0
4	15929	SunS_13_OVCAR3_HILIC_IntactGlycopeptide_F4.15929.15929.4.0.dta	3843.59	4	59.94	ALSQQNVSMDLATFMK	N4H5F1S1	5-4-1-1-0	0	0	4	1	1	1	1	15	b2/b3/b4/b5/b7/	y1/y2/y4/y5/y6/y7/y8/y9/y10/y11/	2059.73	1783.85	11387	4	3843.6	1	0	0
4	15931	SunS_13_OVCAR3_HILIC_IntactGlycopeptide_F4.15931.15931.4.0.dta	4575.88	4	59.95	HNNDTQHIWESDSNEFSVIADPR	N2H9F0S0	9-2-0-0-0	-2	0	2	0	1	0	1	12	b3/b8/	y1/y2/y3/y4/y5/y6/y7/y8/y11/y13/	1864.63	2711.25	3472	4	4575.89	1	1	1
4	15934	SunS_13_OVCAR3_HILIC_IntactGlycopeptide_F4.15934.15934.5.0.dta	5950.57	5	59.96	RPTGEVYDIEIDTLETTCHVLDPTPLANCSVR	N5H6F0S1	6-5-1-0-0	-4	0	1	0	0	0	1	18	b2/b5/b6/b7/b8/b9/b10/b11/b12/b14/b15/b17/b18/b22/	y1/y4/y10/y17/	2278.81	3671.76	12288	5	5951.58	0	1	0
4	15936	SunS_13_OVCAR3_HILIC_IntactGlycopeptide_F4.15936.15936.6.0.dta	5950.56	6	59.96	RPTGEVYDIEIDTLETTCHVLDPTPLANCSVR	N5H6F0S1	6-5-1-0-0	-3	0	1	0	0	0	1	15	b2/b5/b6/b7/b8/b9/b10/b11/b12/b13/b15/b22/	y1/y4/y10/	2278.81	3671.75	6282	6	5950.57	1	1	1
4	15945	SunS_13_OVCAR3_HILIC_IntactGlycopeptide_F4.15945.15945.4.0.dta	5950.58	4	60.01	RPTGEVYDIEIDTLETTCHVLDPTPLANCSVR	N5H6F0S1	6-5-1-0-0	-3	0	1	0	0	0	1	9	b2/b8/b9/b10/b12/b14/b15/b22/	y1/	2278.81	3671.77	8204	4	5950.57	1	1	1
4	15946	SunS_13_OVCAR3_HILIC_IntactGlycopeptide_F4.15946.15946.5.0.dta	5585.47	5	60.01	RPTGEVYDIEIDTLETTCHVLDPTPLANCSVR	N4H5F0S1	5-4-1-0-0	0	0	1	0	0	0	1	15	b2/b7/b8/b9/b10/b11/b12/b14/b15/	y1/y3/y4/y10/y11/y17/	1913.68	3671.79	5681	5	5586.44	0	1	0
4	15954	SunS_13_OVCAR3_HILIC_IntactGlycopeptide_F4.15954.15954.3.0.dta	3843.6	3	60.04	ALSQQNVSMDLATFMK	N4H5F1S1	5-4-1-1-0	-2	0	2	1	0	1	0	8	b7/	y1/y3/y5/y6/y7/y8/y9/	2059.73	1783.86	#N/A	3	3843.6	1	0	0
4	15958	SunS_13_OVCAR3_HILIC_IntactGlycopeptide_F4.15958.15958.4.0.dta	4737.94	4	60.05	HNNDTQHIWESDSNEFSVIADPR	N2H10F0S0	10-2-0-0-0	-1	0	1	0	0	0	1	6	b3/	y1/y2/y5/y6/y7/	2026.69	2711.25	3974	4	4737.93	1	1	1
4	15962	SunS_13_OVCAR3_HILIC_IntactGlycopeptide_F4.15962.15962.4.0.dta	5585.44	4	60.06	RPTGEVYDIEIDTLETTCHVLDPTPLANCSVR	N4H5F0S1	5-4-1-0-0	-2	0	1	0	0	0	1	19	b2/b5/b6/b7/b8/b9/b10/b11/b12/b14/b15/b18/b22/	y1/y2/y4/y10/y17/y20/	1913.68	3671.77	7058	4	5585.44	1	1	1
4	16002	SunS_13_OVCAR3_HILIC_IntactGlycopeptide_F4.16002.16002.4.0.dta	4575.87	4	60.21	HNNDTQHIWESDSNEFSVIADPR	N2H9F0S0	9-2-0-0-0	-2	0	1	0	0	0	1	11	b3/	y1/y2/y3/y4/y5/y6/y7/y8/y11/y13/	1864.63	2711.24	4453	4	4577.9	0	1	0
4	16005	SunS_13_OVCAR3_HILIC_IntactGlycopeptide_F4.16005.16005.5.0.dta	5950.55	5	60.22	RPTGEVYDIEIDTLETTCHVLDPTPLANCSVR	N5H6F0S1	6-5-1-0-0	-4	0	1	0	0	0	1	7	b2/b8/b9/b12/b22/	y1/y4/	2278.81	3671.74	13619	5	5951.56	0	1	0
4	16019	SunS_13_OVCAR3_HILIC_IntactGlycopeptide_F4.16019.16019.5.0.dta	5585.43	5	60.27	RPTGEVYDIEIDTLETTCHVLDPTPLANCSVR	N4H5F0S1	5-4-1-0-0	-3	0	2	0	1	0	1	17	b2/b5/b6/b7/b8/b9/b10/b11/b12/b15/b18/b22/	y1/y3/y4/y10/y17/	1913.68	3671.75	5710	5	5585.44	1	1	1
4	16030	SunS_13_OVCAR3_HILIC_IntactGlycopeptide_F4.16030.16030.4.0.dta	5585.43	4	60.33	RPTGEVYDIEIDTLETTCHVLDPTPLANCSVR	N4H5F0S1	5-4-1-0-0	-3	0	1	0	0	0	1	23	b2/b5/b6/b7/b8/b9/b10/b11/b12/b13/b14/b15/b16/b17/b18/b22/	y1/y2/y3/y4/y10/y17/y20/	1913.68	3671.75	13794	4	5588.46	0	1	0
4	16031	SunS_13_OVCAR3_HILIC_IntactGlycopeptide_F4.16031.16031.6.0.dta	5585.43	6	60.33	RPTGEVYDIEIDTLETTCHVLDPTPLANCSVR	N4H5F0S1	5-4-1-0-0	-2	0	1	0	0	0	1	13	b2/b5/b6/b7/b8/b9/b10/b11/b12/	y1/y3/y4/y10/	1913.68	3671.76	5288	6	5585.46	1	1	1
4	16045	SunS_13_OVCAR3_HILIC_IntactGlycopeptide_F4.16045.16045.4.0.dta	4411.86	4	60.39	QLVLNLTGNTLCAGGASDEK	N4H5F1S2	5-4-2-1-0	-2	0	3	0	1	1	1	10	b2/b3/	y4/y7/y8/y9/y10/y11/y13/y14/	2350.83	2061.03	4503	4	4411.88	1	1	1
4	16088	SunS_13_OVCAR3_HILIC_IntactGlycopeptide_F4.16088.16088.4.0.dta	5585.43	4	60.58	RPTGEVYDIEIDTLETTCHVLDPTPLANCSVR	N4H5F0S1	5-4-1-0-0	-3	0	1	0	0	0	1	7	b2/b8/b10/b12/b22/	y1/y4/	1913.68	3671.75	10512	4	5585.39	1	1	1
4	16119	SunS_13_OVCAR3_HILIC_IntactGlycopeptide_F4.16119.16119.4.0.dta	4020.71	4	60.7	GLGFNLTELAEAEIHK	N5H6F0S1	6-5-1-0-0	-2	0	4	1	1	1	1	27	b2/b3/b4/b5/b6/b7/b8/b9/b10/b11/b12/b13/b14/b15/	y1/y2/y3/y4/y5/y6/y7/y8/y9/y10/y11/y12/y14/	2278.81	1741.9	1838	4	4020.73	1	1	1
4	16122	SunS_13_OVCAR3_HILIC_IntactGlycopeptide_F4.16122.16122.5.0.dta	6258.5	5	60.72	SYSIYPHGVTFSPYDNEVNSSSTSGSNTMIR	N5H6F0S3	6-5-3-0-0	-3	0	1	0	0	0	1	6	b11/b12/	y1/y7/y11/y12/	2861	3397.5	#N/A	5	6261.52	0	1	0
4	16127	SunS_13_OVCAR3_HILIC_IntactGlycopeptide_F4.16127.16127.3.0.dta	4020.7	3	60.74	GLGFNLTELAEAEIHK	N5H6F0S1	6-5-1-0-0	-1	0	4	1	1	1	1	27	b2/b3/b4/b5/b6/b7/b8/b9/b10/b11/b12/b13/b14/b15/	y1/y2/y3/y4/y5/y6/y7/y8/y9/y10/y11/y12/y14/	2278.81	1741.89	834	3	4020.72	1	1	1
4	16182	SunS_13_OVCAR3_HILIC_IntactGlycopeptide_F4.16182.16182.4.0.dta	4020.71	4	60.96	GLGFNLTELAEAEIHK	N5H6F0S1	6-5-1-0-0	-2	0	4	1	1	1	1	26	b2/b3/b4/b5/b6/b7/b8/b9/b10/b11/b12/b13/b14/	y1/y2/y3/y4/y5/y6/y7/y8/y9/y10/y11/y12/y14/	2278.81	1741.9	2519	4	4020.72	1	1	1
4	16189	SunS_13_OVCAR3_HILIC_IntactGlycopeptide_F4.16189.16189.3.0.dta	4020.72	3	61	GLGFNLTELAEAEIHK	N5H6F0S1	6-5-1-0-0	-2	0	4	1	1	1	1	21	b2/b3/b4/b6/b7/b9/b10/b12/b13/	y2/y3/y4/y5/y6/y7/y8/y9/y10/y11/y12/y14/	2278.81	1741.91	3363	3	4020.72	1	1	1
4	16202	SunS_13_OVCAR3_HILIC_IntactGlycopeptide_F4.16202.16202.3.0.dta	3655.6	3	61.05	GLGFNLTELAEAEIHK	N4H5F0S1	5-4-1-0-0	-1	0	4	1	1	1	1	8		y2/y4/y5/y7/y8/y9/y10/y12/	1913.68	1741.92	2157	3	3655.58	1	1	1
4	16229	SunS_13_OVCAR3_HILIC_IntactGlycopeptide_F4.16229.16229.4.0.dta	4729.94	4	61.17	KLCPDCPLLAPLNDSR	N5H6F0S3	6-5-3-0-0	-2	0	4	1	1	1	1	9	b1/b3/b5/b6/b9/b10/	y1/y2/y6/	2861	1868.94	7121	4	4729.94	1	1	1
4	16239	SunS_13_OVCAR3_HILIC_IntactGlycopeptide_F4.16239.16239.4.0.dta	4020.71	4	61.22	GLGFNLTELAEAEIHK	N5H6F0S1	6-5-1-0-0	-2	0	4	1	1	1	1	14	b3/b5/b6/	y1/y2/y3/y4/y5/y6/y7/y8/y9/y10/y11/	2278.81	1741.9	3663	4	4020.73	1	1	1
4	16248	SunS_13_OVCAR3_HILIC_IntactGlycopeptide_F4.16248.16248.3.0.dta	4020.73	3	61.26	GLGFNLTELAEAEIHK	N5H6F0S1	6-5-1-0-0	0	0	4	1	1	1	1	12	b11/	y1/y2/y3/y4/y5/y6/y7/y8/y9/y10/y12/	2278.81	1741.92	3701	3	4020.72	1	1	1
4	16266	SunS_13_OVCAR3_HILIC_IntactGlycopeptide_F4.16266.16266.4.0.dta	4415.93	4	61.34	KDFEDLYTPVNGSIVIVR	N4H5F1S2	5-4-2-1-0	-2	0	3	0	1	1	1	12	b5/b6/b7/b8/b10/	y1/y2/y3/y4/y7/y10/y11/	2350.83	2065.1	4292	4	4415.94	1	1	1
4	16267	SunS_13_OVCAR3_HILIC_IntactGlycopeptide_F4.16267.16267.4.0.dta	4619	4	61.34	KDFEDLYTPVNGSIVIVR	N5H5F1S2	5-5-2-1-0	0	0	4	1	1	1	1	12	b4/b5/b6/b7/b8/	y1/y2/y3/y4/y5/y7/y10/	2553.91	2065.09	#N/A	4	4619.03	1	1	1
4	16344	SunS_13_OVCAR3_HILIC_IntactGlycopeptide_F4.16344.16344.3.0.dta	4729.95	3	61.72	KLCPDCPLLAPLNDSR	N5H6F0S3	6-5-3-0-0	-2	0	3	0	1	1	1	8	b1/b3/b5/b6/b8/b9/b10/	y2/	2861	1868.95	4698	3	4729.93	1	1	1
4	16371	SunS_13_OVCAR3_HILIC_IntactGlycopeptide_F4.16371.16371.4.0.dta	4729.91	4	61.84	KLCPDCPLLAPLNDSR	N5H6F0S3	6-5-3-0-0	-2	0	4	1	1	1	1	10	b1/b3/b5/b6/b8/b9/b10/	y1/y2/y6/	2861	1868.91	8041	4	4729.93	1	1	1
4	16451	SunS_13_OVCAR3_HILIC_IntactGlycopeptide_F4.16451.16451.3.0.dta	4153.73	3	62.23	IFNIDSGNGSIFTSK	N5H5F1S2	5-5-2-1-0	-2	0	3	1	0	1	1	6	b2/b3/	y3/y4/y7/y11/	2553.91	1599.82	3682	3	4153.72	1	1	1
4	16488	SunS_13_OVCAR3_HILIC_IntactGlycopeptide_F4.16488.16488.4.0.dta	4153.71	4	62.42	IFNIDSGNGSIFTSK	N5H5F1S2	5-5-2-1-0	-2	0	4	1	1	1	1	16	b2/b3/b4/b5/b11/	y1/y2/y3/y4/y5/y6/y7/y9/y10/y11/y13/	2553.91	1599.8	3755	4	4153.72	1	1	1
4	16513	SunS_13_OVCAR3_HILIC_IntactGlycopeptide_F4.16513.16513.4.0.dta	4310.76	4	62.55	LCPDCPLLAPLNDSR	N5H6F0S2	6-5-2-0-0	-2	0	4	1	1	1	1	11	b2/b5/b7/b8/b9/	y1/y2/y3/y6/y7/y13/	2569.9	1740.85	#N/A	4	4310.77	1	1	1
4	16525	SunS_13_OVCAR3_HILIC_IntactGlycopeptide_F4.16525.16525.3.0.dta	4310.76	3	62.62	LCPDCPLLAPLNDSR	N5H6F0S2	6-5-2-0-0	-2	0	3	1	0	1	1	9	b2/b5/b6/b7/b8/b9/	y1/y2/y3/	2569.9	1740.86	#N/A	3	4310.75	1	1	1
4	16569	SunS_13_OVCAR3_HILIC_IntactGlycopeptide_F4.16569.16569.4.0.dta	4310.75	4	62.81	LCPDCPLLAPLNDSR	N5H6F0S2	6-5-2-0-0	-2	0	3	1	0	1	1	6	b2/b5/b7/b8/b9/	y2/	2569.9	1740.85	7036	4	4310.74	1	1	1
4	16587	SunS_13_OVCAR3_HILIC_IntactGlycopeptide_F4.16587.16587.4.0.dta	4074.61	4	62.9	VMSWWDYGYQIAGMANR	N2H10F0S0	10-2-0-0-0	0	0	3	0	1	1	1	16	b2/b3/b4/b6/b7/b8/b9/b10/b11/	y1/y5/y6/y8/y10/y13/y14/	2026.69	2047.93	#N/A	4	4074.6	1	0	0
4	16600	SunS_13_OVCAR3_HILIC_IntactGlycopeptide_F4.16600.16600.4.0.dta	4910.01	4	62.96	DIFTSDADLTGISNHSSIR	N5H6F0S3	6-5-3-0-0	-2	0	3	0	1	1	1	7	b2/b7/b10/	y1/y3/y4/y5/	2861	2049.01	#N/A	4	4910	1	1	1
4	16607	SunS_13_OVCAR3_HILIC_IntactGlycopeptide_F4.16607.16607.4.0.dta	3912.56	4	62.98	VMSWWDYGYQIAGMANR	N2H9F0S0	9-2-0-0-0	-1	0	3	0	1	1	1	16	b2/b3/b4/b5/b6/b7/b8/b11/b13/	y1/y5/y6/y7/y10/y12/y13/	1864.63	2047.93	#N/A	2	1957.28	0	1	0
4	16614	SunS_13_OVCAR3_HILIC_IntactGlycopeptide_F4.16614.16614.3.0.dta	3912.55	3	63.02	VMSWWDYGYQIAGMANR	N2H9F0S0	9-2-0-0-0	0	0	3	1	1	1	0	21	b2/b3/b4/b5/b6/b7/b8/b9/b11/	y1/y3/y4/y5/y6/y7/y8/y10/y11/y12/y13/y14/	1864.63	2047.91	#N/A	3	3912.56	1	0	0
4	16622	SunS_13_OVCAR3_HILIC_IntactGlycopeptide_F4.16622.16622.4.0.dta	4310.76	4	63.06	LCPDCPLLAPLNDSR	N5H6F0S2	6-5-2-0-0	-2	0	3	1	0	1	1	7	b2/b5/b7/b8/b9/	y1/y2/	2569.9	1740.85	#N/A	4	4310.75	1	1	1
4	16627	SunS_13_OVCAR3_HILIC_IntactGlycopeptide_F4.16627.16627.3.0.dta	4310.73	3	63.09	LCPDCPLLAPLNDSR	N5H6F0S2	6-5-2-0-0	-2	0	2	0	0	1	1	6	b2/b4/b8/b9/	y1/y2/	2569.9	1740.83	6491	3	4310.74	1	1	1
4	16661	SunS_13_OVCAR3_HILIC_IntactGlycopeptide_F4.16661.16661.4.0.dta	3912.54	4	63.25	VMSWWDYGYQIAGMANR	N2H9F0S0	9-2-0-0-0	0	0	3	1	1	1	0	13	b2/b3/b5/b6/b7/b8/b10/b11/	y1/y6/y9/y10/y11/	1864.63	2047.91	#N/A	4	3912.55	1	0	0
4	16662	SunS_13_OVCAR3_HILIC_IntactGlycopeptide_F4.16662.16662.4.0.dta	4474.93	4	63.25	IETVLPAEFFEVLSSSQNGSYHR	N2H9F0S0	9-2-0-0-0	-2	0	2	0	1	0	1	12	b2/b3/b4/b5/	y1/y3/y4/y5/y9/y10/y11/y18/	1864.63	2610.29	3935	4	4474.93	1	1	1
4	16666	SunS_13_OVCAR3_HILIC_IntactGlycopeptide_F4.16666.16666.3.0.dta	4474.94	3	63.27	IETVLPAEFFEVLSSSQNGSYHR	N2H9F0S0	9-2-0-0-0	0	0	2	0	1	0	1	12	b2/b3/b4/b5/b9/	y1/y2/y3/y4/y5/y10/y18/	1864.63	2610.3	3667	3	4474.92	1	1	1
4	16668	SunS_13_OVCAR3_HILIC_IntactGlycopeptide_F4.16668.16668.3.0.dta	3912.56	3	63.28	VMSWWDYGYQIAGMANR	N2H9F0S0	9-2-0-0-0	0	0	3	1	0	1	1	18	b2/b3/b4/b5/b6/b7/b8/b9/b11/	y1/y3/y4/y5/y6/y10/y11/y12/y13/	1864.63	2047.92	#N/A	3	3912.55	1	0	0
4	16676	SunS_13_OVCAR3_HILIC_IntactGlycopeptide_F4.16676.16676.4.0.dta	4310.74	4	63.32	LCPDCPLLAPLNDSR	N5H6F0S2	6-5-2-0-0	-2	0	4	1	1	1	1	16	b2/b3/b4/b5/b6/b7/b8/b9/	y1/y2/y3/y6/y7/y10/y11/y13/	2569.9	1740.84	#N/A	4	4310.74	1	1	1
4	16682	SunS_13_OVCAR3_HILIC_IntactGlycopeptide_F4.16682.16682.3.0.dta	4310.74	3	63.35	LCPDCPLLAPLNDSR	N5H6F0S2	6-5-2-0-0	-2	0	4	1	1	1	1	13	b2/b3/b5/b6/b7/b8/b9/	y1/y2/y3/y6/y7/y13/	2569.9	1740.84	4141	3	4310.74	1	1	1
4	16684	SunS_13_OVCAR3_HILIC_IntactGlycopeptide_F4.16684.16684.5.0.dta	4474.89	5	63.36	IETVLPAEFFEVLSSSQNGSYHR	N2H9F0S0	9-2-0-0-0	0	0	1	0	0	0	1	8	b2/b3/b4/b5/	y1/y3/y4/y5/	1864.63	2610.26	4129	5	4474.91	1	1	1
4	16728	SunS_13_OVCAR3_HILIC_IntactGlycopeptide_F4.16728.16728.4.0.dta	4474.93	4	63.51	IETVLPAEFFEVLSSSQNGSYHR	N2H9F0S0	9-2-0-0-0	-2	0	2	0	1	0	1	23	b2/b3/b4/b5/b6/b7/b8/b9/b10/b11/b12/	y1/y2/y3/y4/y5/y6/y8/y9/y10/y11/y12/y18/	1864.63	2610.3	3764	4	4474.93	1	1	1
4	16732	SunS_13_OVCAR3_HILIC_IntactGlycopeptide_F4.16732.16732.3.0.dta	4474.93	3	63.53	IETVLPAEFFEVLSSSQNGSYHR	N2H9F0S0	9-2-0-0-0	-2	0	3	0	1	1	1	24	b2/b3/b4/b5/b6/b7/b8/b9/b10/b12/b13/	y1/y2/y3/y4/y5/y6/y8/y9/y10/y11/y12/y13/y18/	1864.63	2610.29	3443	3	4474.91	1	1	1
4	16743	SunS_13_OVCAR3_HILIC_IntactGlycopeptide_F4.16743.16743.4.0.dta	4310.73	4	63.57	LCPDCPLLAPLNDSR	N5H6F0S2	6-5-2-0-0	-2	0	3	1	0	1	1	9	b2/b5/b6/b7/b8/b9/	y1/y2/y6/	2569.9	1740.83	6763	4	4310.75	1	1	1
4	16753	SunS_13_OVCAR3_HILIC_IntactGlycopeptide_F4.16753.16753.3.0.dta	4310.73	3	63.61	LCPDCPLLAPLNDSR	N5H6F0S2	6-5-2-0-0	-2	0	3	1	0	1	1	7	b2/b5/b7/b8/b9/	y1/y2/	2569.9	1740.82	5041	3	4310.74	1	1	1
4	16783	SunS_13_OVCAR3_HILIC_IntactGlycopeptide_F4.16783.16783.4.0.dta	4588.93	4	63.76	SGDASINVTNLQLSDIGTYQCK	N4H5F0S2	5-4-2-0-0	-2	0	1	0	1	0	0	12	b11/b13/	y3/y4/y5/y6/y7/y8/y9/y10/y11/y14/	2204.77	2384.16	2085	4	4588.93	1	1	1
4	16785	SunS_13_OVCAR3_HILIC_IntactGlycopeptide_F4.16785.16785.4.0.dta	4474.94	4	63.77	IETVLPAEFFEVLSSSQNGSYHR	N2H9F0S0	9-2-0-0-0	-2	0	1	0	0	0	1	10	b2/b3/b4/b5/	y1/y2/y3/y5/y10/y11/	1864.63	2610.31	4001	4	4474.94	1	1	1
4	16798	SunS_13_OVCAR3_HILIC_IntactGlycopeptide_F4.16798.16798.3.0.dta	4474.91	3	63.83	IETVLPAEFFEVLSSSQNGSYHR	N2H9F0S0	9-2-0-0-0	-2	0	1	0	0	0	1	7	b2/b3/b4/b5/	y1/y3/y5/	1864.63	2610.27	4033	3	4474.93	1	1	1
4	16858	SunS_13_OVCAR3_HILIC_IntactGlycopeptide_F4.16858.16858.4.0.dta	4310.75	4	64.14	LCPDCPLLAPLNDSR	N5H6F0S2	6-5-2-0-0	0	0	4	1	1	1	1	15	b2/b3/b5/b6/b7/b8/b9/b13/	y1/y2/y3/y6/y7/y10/y13/	2569.9	1740.84	#N/A	4	4310.76	1	1	1
4	16869	SunS_13_OVCAR3_HILIC_IntactGlycopeptide_F4.16869.16869.4.0.dta	3945.61	4	64.18	LCPDCPLLAPLNDSR	N4H5F0S2	5-4-2-0-0	-1	0	2	1	0	1	0	7	b2/b5/b7/b8/b9/	y2/y6/	2204.77	1740.84	6609	4	3945.62	1	1	1
4	16872	SunS_13_OVCAR3_HILIC_IntactGlycopeptide_F4.16872.16872.4.0.dta	4474.91	4	64.18	IETVLPAEFFEVLSSSQNGSYHR	N2H9F0S0	9-2-0-0-0	0	0	1	0	0	0	1	6	b2/b3/b4/b5/	y1/y5/	1864.63	2610.27	#N/A	3	3353.44	0	1	0
4	16880	SunS_13_OVCAR3_HILIC_IntactGlycopeptide_F4.16880.16880.3.0.dta	4310.77	3	64.21	LCPDCPLLAPLNDSR	N5H6F0S2	6-5-2-0-0	0	0	3	1	0	1	1	7	b2/b5/b7/b8/b9/	y1/y2/	2569.9	1740.86	#N/A	3	4310.75	1	1	1
4	16921	SunS_13_OVCAR3_HILIC_IntactGlycopeptide_F4.16921.16921.5.0.dta	6241.71	5	64.41	RPTGEVYDIEIDTLETTCHVLDPTPLANCSVR	N5H6F0S2	6-5-2-0-0	-2	0	2	0	1	0	1	11	b2/b8/b9/b10/b11/b12/b15/b22/	y1/y4/y20/	2569.9	3671.8	#N/A	5	6242.7	0	1	0
4	16924	SunS_13_OVCAR3_HILIC_IntactGlycopeptide_F4.16924.16924.4.0.dta	5219.21	4	64.43	SNLDPSNVDSLFYAAQASQALSGCEISISNETK	N2H8F0S0	8-2-0-0-0	-2	0	1	0	1	0	0	34	b2/b3/b4/b5/b6/b7/b8/b9/b10/b11/b12/b13/b14/b15/b17/	y1/y2/y3/y4/y5/y6/y7/y8/y9/y10/y11/y12/y13/y14/y16/y17/y18/y19/y20/	1702.58	3516.63	936	4	5219.24	1	1	1
4	16926	SunS_13_OVCAR3_HILIC_IntactGlycopeptide_F4.16926.16926.6.0.dta	6241.7	6	64.43	RPTGEVYDIEIDTLETTCHVLDPTPLANCSVR	N5H6F0S2	6-5-2-0-0	-3	0	1	0	0	0	1	8	b2/b6/b8/b9/b10/b11/b12/	y1/	2569.9	3671.79	6021	6	6241.7	1	1	1
4	16930	SunS_13_OVCAR3_HILIC_IntactGlycopeptide_F4.16930.16930.4.0.dta	3945.62	4	64.44	LCPDCPLLAPLNDSR	N4H5F0S2	5-4-2-0-0	0	0	3	1	0	1	1	12	b2/b3/b5/b6/b7/b8/b9/	y2/y3/y6/y7/y13/	2204.77	1740.85	#N/A	4	3945.63	1	1	1
4	16931	SunS_13_OVCAR3_HILIC_IntactGlycopeptide_F4.16931.16931.3.0.dta	3945.61	3	64.44	LCPDCPLLAPLNDSR	N4H5F0S2	5-4-2-0-0	-2	0	4	1	1	1	1	12	b2/b3/b5/b7/b8/b9/	y1/y2/y3/y6/y7/y13/	2204.77	1740.84	4588	3	3945.62	1	1	1
4	16932	SunS_13_OVCAR3_HILIC_IntactGlycopeptide_F4.16932.16932.4.0.dta	6241.69	4	64.45	RPTGEVYDIEIDTLETTCHVLDPTPLANCSVR	N5H6F0S2	6-5-2-0-0	-3	0	1	0	0	0	1	9	b2/b5/b8/b9/b10/b11/b12/b15/	y1/	2569.9	3671.79	#N/A	4	6242.69	0	1	0
4	16975	SunS_13_OVCAR3_HILIC_IntactGlycopeptide_F4.16975.16975.5.0.dta	5876.53	5	64.64	RPTGEVYDIEIDTLETTCHVLDPTPLANCSVR	N4H5F0S2	5-4-2-0-0	-4	0	1	0	0	0	1	8	b1/b2/b7/b8/b10/b12/b15/	y1/	2204.77	3671.76	13503	5	5877.55	0	1	0
4	16979	SunS_13_OVCAR3_HILIC_IntactGlycopeptide_F4.16979.16979.5.0.dta	6241.72	5	64.66	RPTGEVYDIEIDTLETTCHVLDPTPLANCSVR	N5H6F0S2	6-5-2-0-0	-3	0	2	0	1	0	1	17	b2/b5/b6/b7/b8/b9/b10/b11/b12/b14/b15/b22/	y1/y3/y4/y10/y17/	2569.9	3671.81	#N/A	5	6242.68	0	1	0
4	16990	SunS_13_OVCAR3_HILIC_IntactGlycopeptide_F4.16990.16990.4.0.dta	6241.67	4	64.7	RPTGEVYDIEIDTLETTCHVLDPTPLANCSVR	N5H6F0S2	6-5-2-0-0	-3	0	1	0	0	0	1	9	b2/b8/b10/b11/b12/b22/	y1/y4/y17/	2569.9	3671.76	8428	4	6241.68	1	1	1
4	16991	SunS_13_OVCAR3_HILIC_IntactGlycopeptide_F4.16991.16991.6.0.dta	6241.69	6	64.7	RPTGEVYDIEIDTLETTCHVLDPTPLANCSVR	N5H6F0S2	6-5-2-0-0	-3	0	1	0	0	0	1	17	b2/b5/b6/b7/b8/b9/b10/b11/b12/b14/b15/b18/b22/	y1/y3/y4/y10/	2569.9	3671.79	5498	6	6241.69	1	1	1
4	16992	SunS_13_OVCAR3_HILIC_IntactGlycopeptide_F4.16992.16992.4.0.dta	3945.61	4	64.71	LCPDCPLLAPLNDSR	N4H5F0S2	5-4-2-0-0	-1	0	3	1	0	1	1	6	b2/b5/b8/b9/	y2/y6/	2204.77	1740.83	#N/A	4	3945.62	1	1	1
4	17005	SunS_13_OVCAR3_HILIC_IntactGlycopeptide_F4.17005.17005.7.0.dta	6241.69	7	64.75	RPTGEVYDIEIDTLETTCHVLDPTPLANCSVR	N5H6F0S2	6-5-2-0-0	-3	0	1	0	0	0	1	7	b2/b5/b6/b8/b9/b10/b12/		2569.9	3671.78	#N/A	7	6244.68	0	1	0
4	17013	SunS_13_OVCAR3_HILIC_IntactGlycopeptide_F4.17013.17013.3.0.dta	4895.15	3	64.79	SNLDPSNVDSLFYAAQASQALSGCEISISNETK	N2H6F0S0	6-2-0-0-0	0	0	1	0	1	0	0	32	b2/b3/b4/b5/b6/b7/b8/b9/b10/b11/b12/b13/b14/b15/b17/	y1/y2/y3/y4/y5/y6/y7/y8/y9/y11/y12/y13/y14/y16/y17/y19/y20/	1378.48	3516.67	913	3	4895.13	1	1	1
4	17036	SunS_13_OVCAR3_HILIC_IntactGlycopeptide_F4.17036.17036.5.0.dta	5876.54	5	64.9	RPTGEVYDIEIDTLETTCHVLDPTPLANCSVR	N4H5F0S2	5-4-2-0-0	-2	0	1	0	0	0	1	11	b2/b8/b9/b10/b11/b12/b15/b22/	y1/y4/y10/	2204.77	3671.77	12838	5	5877.57	0	1	0
4	17039	SunS_13_OVCAR3_HILIC_IntactGlycopeptide_F4.17039.17039.5.0.dta	6241.69	5	64.92	RPTGEVYDIEIDTLETTCHVLDPTPLANCSVR	N5H6F0S2	6-5-2-0-0	0	0	1	0	0	0	1	11	b2/b5/b8/b9/b10/b11/b12/b22/	y1/y10/y17/	2569.9	3671.78	#N/A	5	6242.7	0	1	0
4	17054	SunS_13_OVCAR3_HILIC_IntactGlycopeptide_F4.17054.17054.4.0.dta	5876.57	4	64.99	RPTGEVYDIEIDTLETTCHVLDPTPLANCSVR	N4H5F0S2	5-4-2-0-0	0	0	1	0	0	0	1	11	b2/b5/b8/b11/b12/b15/b22/	y1/y3/y4/y10/	2204.77	3671.8	5718	4	5876.57	1	1	1
4	17234	SunS_13_OVCAR3_HILIC_IntactGlycopeptide_F4.17234.17234.4.0.dta	4564.95	4	65.91	DFEDLYTPVNGSIVIVR	N6H6F1S1	6-6-1-1-0	0	0	2	1	0	1	0	13	b3/b4/b5/b6/b7/	y1/y2/y3/y4/y5/y7/y10/y11/	2627.95	1937	4030	4	4564.95	1	1	1
4	17236	SunS_13_OVCAR3_HILIC_IntactGlycopeptide_F4.17236.17236.4.0.dta	4653.98	4	65.92	DFEDLYTPVNGSIVIVR	N5H6F3S1	6-5-1-3-0	-2	0	2	1	0	1	0	8	b2/b4/b5/b6/b7/	y1/y3/y10/	2716.98	1937	4461	4	4653.98	1	1	1
4	17289	SunS_13_OVCAR3_HILIC_IntactGlycopeptide_F4.17289.17289.4.0.dta	4564.94	4	66.17	DFEDLYTPVNGSIVIVR	N6H6F1S1	6-6-1-1-0	-2	0	2	1	0	1	0	15	b2/b3/b4/b5/b6/b7/	y1/y2/y3/y4/y5/y6/y7/y10/y11/	2627.95	1937	2211	4	4564.95	1	1	1
4	17301	SunS_13_OVCAR3_HILIC_IntactGlycopeptide_F4.17301.17301.4.0.dta	4361.86	4	66.22	DFEDLYTPVNGSIVIVR	N5H6F1S1	6-5-1-1-0	-1	0	2	1	0	1	0	14	b2/b3/b4/b5/b6/b7/	y1/y2/y3/y4/y5/y7/y10/y12/	2424.87	1936.99	3623	4	4361.86	1	1	1
4	17313	SunS_13_OVCAR3_HILIC_IntactGlycopeptide_F4.17313.17313.3.0.dta	4361.84	3	66.27	DFEDLYTPVNGSIVIVR	N5H6F1S1	6-5-1-1-0	-2	0	2	1	0	1	0	11	b2/b3/b4/b5/b6/b7/	y1/y2/y3/y4/y7/	2424.87	1936.98	3288	3	4361.86	1	1	1
4	17359	SunS_13_OVCAR3_HILIC_IntactGlycopeptide_F4.17359.17359.4.0.dta	4361.87	4	66.48	DFEDLYTPVNGSIVIVR	N5H6F1S1	6-5-1-1-0	-2	0	2	1	0	1	0	16	b2/b3/b4/b5/b6/b7/	y1/y2/y3/y4/y5/y6/y7/y10/y11/y12/	2424.87	1937.01	3441	4	4361.87	1	1	1
4	17372	SunS_13_OVCAR3_HILIC_IntactGlycopeptide_F4.17372.17372.3.0.dta	4361.88	3	66.53	DFEDLYTPVNGSIVIVR	N5H6F1S1	6-5-1-1-0	0	0	2	1	0	1	0	11	b2/b3/b4/b5/b7/	y1/y2/y3/y4/y7/y10/	2424.87	1937.01	3915	3	4361.87	1	1	1
4	17415	SunS_13_OVCAR3_HILIC_IntactGlycopeptide_F4.17415.17415.4.0.dta	5243.17	4	66.75	DSLNSSHPISSSVQSSEQIEEMFDSLSYFK	N2H9F0S0	9-2-0-0-0	-2	0	2	0	1	0	1	15	b10/b14/	y1/y2/y3/y4/y5/y6/y7/y8/y9/y10/y11/y12/y13/	1864.63	3378.54	8280	4	5243.16	1	0	0
4	17499	SunS_13_OVCAR3_HILIC_IntactGlycopeptide_F4.17499.17499.4.0.dta	5191.22	4	67.09	ISAFFQHFQNNGSLVWCQNHK	N6H6F3S0	6-6-0-3-0	0	0	1	0	1	0	0	8	b3/b4/b5/b10/	y4/y7/y8/y10/	2628.97	2562.26	#N/A	4	5191.24	1	0	0
4	17583	SunS_13_OVCAR3_HILIC_IntactGlycopeptide_F4.17583.17583.4.0.dta	4311.81	4	67.46	GLGFNLTELAEAEIHK	N5H6F0S2	6-5-2-0-0	-2	0	4	1	1	1	1	12	b3/	y1/y2/y3/y4/y5/y6/y7/y8/y9/y10/y11/	2569.9	1741.9	#N/A	4	4311.8	1	1	1
4	17620	SunS_13_OVCAR3_HILIC_IntactGlycopeptide_F4.17620.17620.5.0.dta	4311.79	5	67.58	GLGFNLTELAEAEIHK	N5H6F0S2	6-5-2-0-0	-2	0	4	1	1	1	1	9		y2/y3/y5/y6/y7/y8/y9/y10/y11/	2569.9	1741.89	3103	5	4311.8	1	1	1
4	17662	SunS_13_OVCAR3_HILIC_IntactGlycopeptide_F4.17662.17662.4.0.dta	4311.79	4	67.72	GLGFNLTELAEAEIHK	N5H6F0S2	6-5-2-0-0	-2	0	4	1	1	1	1	27	b2/b3/b4/b5/b6/b7/b8/b9/b10/b11/b12/b13/b14/b15/	y1/y2/y3/y4/y5/y6/y7/y8/y9/y10/y11/y12/y14/	2569.9	1741.89	#N/A	4	4311.81	1	1	1
4	17665	SunS_13_OVCAR3_HILIC_IntactGlycopeptide_F4.17665.17665.3.0.dta	4311.8	3	67.73	GLGFNLTELAEAEIHK	N5H6F0S2	6-5-2-0-0	-2	0	4	1	1	1	1	22	b3/b5/b6/b7/b8/b9/b10/b11/b13/b15/	y2/y3/y4/y5/y6/y7/y8/y9/y10/y11/y12/y14/	2569.9	1741.89	3318	3	4311.8	1	1	1
4	17708	SunS_13_OVCAR3_HILIC_IntactGlycopeptide_F4.17708.17708.5.0.dta	4311.78	5	67.85	GLGFNLTELAEAEIHK	N5H6F0S2	6-5-2-0-0	-2	0	4	1	1	1	1	27	b2/b3/b4/b5/b6/b7/b8/b9/b10/b11/b12/b13/b14/b15/	y1/y2/y3/y4/y5/y6/y7/y8/y9/y10/y11/y12/y14/	2569.9	1741.88	#N/A	5	4311.79	1	1	1
4	17716	SunS_13_OVCAR3_HILIC_IntactGlycopeptide_F4.17716.17716.3.0.dta	4602.92	3	67.86	GLGFNLTELAEAEIHK	N5H6F0S3	6-5-3-0-0	-2	0	4	1	1	1	1	10	b3/	y2/y3/y4/y5/y6/y7/y8/y9/y10/	2861	1741.92	#N/A	3	4601.93	0	1	0
4	17765	SunS_13_OVCAR3_HILIC_IntactGlycopeptide_F4.17765.17765.3.0.dta	4311.82	3	68	GLGFNLTELAEAEIHK	N5H6F0S2	6-5-2-0-0	-2	0	4	1	1	1	1	26	b2/b3/b4/b5/b6/b7/b8/b9/b10/b11/b12/b13/b14/	y1/y2/y3/y4/y5/y6/y7/y8/y9/y10/y11/y12/y14/	2569.9	1741.91	1902	3	4311.81	1	1	1
4	17788	SunS_13_OVCAR3_HILIC_IntactGlycopeptide_F4.17788.17788.4.0.dta	3946.69	4	68.07	GLGFNLTELAEAEIHK	N4H5F0S2	5-4-2-0-0	0	0	4	1	1	1	1	10		y1/y2/y4/y5/y6/y7/y8/y9/y10/y14/	2204.77	1741.91	5102	4	3946.67	1	1	1
4	17824	SunS_13_OVCAR3_HILIC_IntactGlycopeptide_F4.17824.17824.3.0.dta	3946.67	3	68.19	GLGFNLTELAEAEIHK	N4H5F0S2	5-4-2-0-0	-1	0	4	1	1	1	1	21	b2/b3/b6/b7/b8/b9/b10/b11/b12/	y1/y2/y3/y4/y5/y6/y7/y8/y9/y10/y11/y14/	2204.77	1741.89	3446	3	3946.66	1	1	1
4	17830	SunS_13_OVCAR3_HILIC_IntactGlycopeptide_F4.17830.17830.5.0.dta	3946.66	5	68.21	GLGFNLTELAEAEIHK	N4H5F0S2	5-4-2-0-0	-1	0	4	1	1	1	1	9		y2/y3/y5/y6/y7/y8/y9/y10/y11/	2204.77	1741.89	5000	5	3946.66	1	1	1
4	17844	SunS_13_OVCAR3_HILIC_IntactGlycopeptide_F4.17844.17844.4.0.dta	4311.8	4	68.25	GLGFNLTELAEAEIHK	N5H6F0S2	6-5-2-0-0	-2	0	4	1	1	1	1	27	b2/b3/b4/b5/b6/b7/b8/b9/b10/b11/b12/b13/b14/b15/	y1/y2/y3/y4/y5/y6/y7/y8/y9/y10/y11/y12/y14/	2569.9	1741.89	4194	4	4311.82	1	1	1
4	17888	SunS_13_OVCAR3_HILIC_IntactGlycopeptide_F4.17888.17888.4.0.dta	3946.66	4	68.36	GLGFNLTELAEAEIHK	N4H5F0S2	5-4-2-0-0	-2	0	4	1	1	1	1	18	b3/b5/b6/b8/b14/	y1/y2/y3/y4/y5/y6/y7/y8/y9/y10/y11/y12/y14/	2204.77	1741.89	2851	4	3946.67	1	1	1
4	17889	SunS_13_OVCAR3_HILIC_IntactGlycopeptide_F4.17889.17889.5.0.dta	4311.79	5	68.36	GLGFNLTELAEAEIHK	N5H6F0S2	6-5-2-0-0	-2	0	4	1	1	1	1	22	b2/b3/b5/b6/b8/b9/b11/b13/b14/	y1/y2/y3/y4/y5/y6/y7/y8/y9/y10/y11/y12/y14/	2569.9	1741.89	#N/A	5	4311.8	1	1	1
4	17897	SunS_13_OVCAR3_HILIC_IntactGlycopeptide_F4.17897.17897.4.0.dta	4020.72	4	68.38	GLGFNLTELAEAEIHK	N5H6F0S1	6-5-1-0-0	-2	0	4	1	1	1	1	6		y2/y5/y6/y7/y8/y10/	2278.81	1741.91	5042	4	4020.71	1	1	1
4	17937	SunS_13_OVCAR3_HILIC_IntactGlycopeptide_F4.17937.17937.4.0.dta	4311.81	4	68.5	GLGFNLTELAEAEIHK	N5H6F0S2	6-5-2-0-0	-2	0	4	1	1	1	1	27	b2/b3/b4/b5/b6/b7/b8/b9/b10/b11/b12/b13/b14/b15/	y1/y2/y3/y4/y5/y6/y7/y8/y9/y10/y11/y12/y14/	2569.9	1741.91	#N/A	4	4311.88	1	1	1
4	17964	SunS_13_OVCAR3_HILIC_IntactGlycopeptide_F4.17964.17964.5.0.dta	4311.83	5	68.62	GLGFNLTELAEAEIHK	N5H6F0S2	6-5-2-0-0	-2	0	4	1	1	1	1	10		y2/y3/y4/y5/y6/y7/y8/y9/y10/y11/	2569.9	1741.92	3797	5	4311.81	1	1	1
4	17965	SunS_13_OVCAR3_HILIC_IntactGlycopeptide_F4.17965.17965.4.0.dta	3946.69	4	68.62	GLGFNLTELAEAEIHK	N4H5F0S2	5-4-2-0-0	-2	0	4	1	1	1	1	17	b2/b3/b6/b8/b9/	y1/y2/y3/y4/y5/y6/y7/y8/y9/y10/y11/y12/	2204.77	1741.92	3379	4	3946.68	1	1	1
4	17989	SunS_13_OVCAR3_HILIC_IntactGlycopeptide_F4.17989.17989.3.0.dta	3946.69	3	68.72	GLGFNLTELAEAEIHK	N4H5F0S2	5-4-2-0-0	-1	0	4	1	1	1	1	9		y2/y3/y5/y6/y7/y8/y9/y10/y11/	2204.77	1741.92	2916	3	3946.67	1	1	1
4	18000	SunS_13_OVCAR3_HILIC_IntactGlycopeptide_F4.18000.18000.4.0.dta	4311.84	4	68.76	GLGFNLTELAEAEIHK	N5H6F0S2	6-5-2-0-0	-2	0	4	1	1	1	1	27	b2/b3/b4/b5/b6/b7/b8/b9/b10/b11/b12/b13/b14/b15/	y1/y2/y3/y4/y5/y6/y7/y8/y9/y10/y11/y12/y14/	2569.9	1741.94	#N/A	2	2156.45	0	1	0
4	18003	SunS_13_OVCAR3_HILIC_IntactGlycopeptide_F4.18003.18003.3.0.dta	4311.8	3	68.77	GLGFNLTELAEAEIHK	N5H6F0S2	6-5-2-0-0	-2	0	4	1	1	1	1	27	b2/b3/b4/b5/b6/b7/b8/b9/b10/b11/b12/b13/b14/b15/	y1/y2/y3/y4/y5/y6/y7/y8/y9/y10/y11/y12/y14/	2569.9	1741.89	3109	3	4311.81	1	1	1
4	18027	SunS_13_OVCAR3_HILIC_IntactGlycopeptide_F4.18027.18027.5.0.dta	4311.81	5	68.87	GLGFNLTELAEAEIHK	N5H6F0S2	6-5-2-0-0	-2	0	4	1	1	1	1	10	b6/	y2/y3/y5/y6/y7/y8/y9/y10/y11/	2569.9	1741.91	#N/A	5	4313.82	0	1	0
4	18030	SunS_13_OVCAR3_HILIC_IntactGlycopeptide_F4.18030.18030.4.0.dta	3946.66	4	68.89	GLGFNLTELAEAEIHK	N4H5F0S2	5-4-2-0-0	-2	0	4	1	1	1	1	8		y2/y3/y5/y6/y7/y8/y9/y10/	2204.77	1741.89	5299	4	3946.68	1	1	1
4	18059	SunS_13_OVCAR3_HILIC_IntactGlycopeptide_F4.18059.18059.4.0.dta	4311.8	4	69.02	GLGFNLTELAEAEIHK	N5H6F0S2	6-5-2-0-0	-2	0	4	1	1	1	1	27	b2/b3/b4/b5/b6/b7/b8/b9/b10/b11/b12/b13/b14/b15/	y1/y2/y3/y4/y5/y6/y7/y8/y9/y10/y11/y12/y14/	2569.9	1741.9	4274	4	4311.82	1	1	1
4	18061	SunS_13_OVCAR3_HILIC_IntactGlycopeptide_F4.18061.18061.3.0.dta	4311.8	3	69.03	GLGFNLTELAEAEIHK	N5H6F0S2	6-5-2-0-0	-2	0	4	1	1	1	1	18	b3/b6/b9/b13/b14/	y1/y2/y3/y4/y5/y6/y7/y8/y9/y10/y11/y12/y14/	2569.9	1741.9	3353	3	4311.81	1	1	1
4	18107	SunS_13_OVCAR3_HILIC_IntactGlycopeptide_F4.18107.18107.4.0.dta	4311.82	4	69.28	GLGFNLTELAEAEIHK	N5H6F0S2	6-5-2-0-0	-2	0	4	1	1	1	1	13	b6/b9/	y1/y2/y3/y4/y5/y6/y7/y8/y9/y10/y11/	2569.9	1741.92	4680	4	4311.82	1	1	1
4	18109	SunS_13_OVCAR3_HILIC_IntactGlycopeptide_F4.18109.18109.3.0.dta	4311.84	3	69.29	GLGFNLTELAEAEIHK	N5H6F0S2	6-5-2-0-0	-2	0	4	1	1	1	1	17	b3/b6/b11/b14/b15/	y1/y2/y3/y4/y5/y6/y7/y8/y9/y10/y11/y12/	2569.9	1741.93	2226	3	4311.81	1	1	1
4	18156	SunS_13_OVCAR3_HILIC_IntactGlycopeptide_F4.18156.18156.4.0.dta	4311.83	4	69.53	GLGFNLTELAEAEIHK	N5H6F0S2	6-5-2-0-0	-2	0	4	1	1	1	1	14	b2/b9/b13/	y1/y2/y3/y4/y5/y6/y7/y8/y9/y10/y11/	2569.9	1741.92	4817	4	4311.82	1	1	1
4	18158	SunS_13_OVCAR3_HILIC_IntactGlycopeptide_F4.18158.18158.3.0.dta	4311.81	3	69.54	GLGFNLTELAEAEIHK	N5H6F0S2	6-5-2-0-0	-2	0	4	1	1	1	1	10	b3/	y2/y4/y5/y6/y7/y8/y9/y10/y11/	2569.9	1741.91	2934	3	4311.81	1	1	1
4	18204	SunS_13_OVCAR3_HILIC_IntactGlycopeptide_F4.18204.18204.4.0.dta	4311.81	4	69.79	GLGFNLTELAEAEIHK	N5H6F0S2	6-5-2-0-0	-2	0	4	1	1	1	1	14	b3/b6/b10/	y2/y3/y4/y5/y6/y7/y8/y9/y10/y11/y12/	2569.9	1741.91	#N/A	4	4311.82	1	1	1
4	18207	SunS_13_OVCAR3_HILIC_IntactGlycopeptide_F4.18207.18207.3.0.dta	4311.82	3	69.81	GLGFNLTELAEAEIHK	N5H6F0S2	6-5-2-0-0	-2	0	4	1	1	1	1	8		y2/y4/y5/y7/y8/y9/y10/y14/	2569.9	1741.91	5908	3	4311.82	1	1	1
4	18239	SunS_13_OVCAR3_HILIC_IntactGlycopeptide_F4.18239.18239.5.0.dta	6532.76	5	69.97	RPTGEVYDIEIDTLETTCHVLDPTPLANCSVR	N5H6F0S3	6-5-3-0-0	-4	0	1	0	0	0	1	11	b2/b8/b10/b11/b12/b15/b22/	y1/y4/y10/y17/	2861	3671.76	#N/A	5	6533.76	0	1	0
4	18245	SunS_13_OVCAR3_HILIC_IntactGlycopeptide_F4.18245.18245.7.0.dta	6532.74	7	70	RPTGEVYDIEIDTLETTCHVLDPTPLANCSVR	N5H6F0S3	6-5-3-0-0	-2	0	1	0	0	0	1	10	b2/b7/b8/b10/b11/b12/b13/	y1/y3/y10/	2861	3671.74	#N/A	7	6534.76	0	1	0
4	18254	SunS_13_OVCAR3_HILIC_IntactGlycopeptide_F4.18254.18254.4.0.dta	4311.81	4	70.05	GLGFNLTELAEAEIHK	N5H6F0S2	6-5-2-0-0	-2	0	4	1	1	1	1	6		y5/y6/y7/y8/y9/y10/	2569.9	1741.91	3668	4	4311.81	1	1	1
4	18257	SunS_13_OVCAR3_HILIC_IntactGlycopeptide_F4.18257.18257.3.0.dta	4311.79	3	70.06	GLGFNLTELAEAEIHK	N5H6F0S2	6-5-2-0-0	-2	0	4	1	1	1	1	7		y2/y5/y6/y7/y8/y9/y10/	2569.9	1741.88	5980	3	4311.81	1	1	1
4	18277	SunS_13_OVCAR3_HILIC_IntactGlycopeptide_F4.18277.18277.6.0.dta	6532.75	6	70.18	RPTGEVYDIEIDTLETTCHVLDPTPLANCSVR	N5H6F0S3	6-5-3-0-0	-3	0	1	0	0	0	1	17	b2/b5/b6/b7/b8/b9/b10/b11/b12/b13/b14/b22/	y1/y3/y4/y10/y17/	2861	3671.75	7388	6	6532.78	1	1	1
4	18286	SunS_13_OVCAR3_HILIC_IntactGlycopeptide_F4.18286.18286.5.0.dta	6532.75	5	70.22	RPTGEVYDIEIDTLETTCHVLDPTPLANCSVR	N5H6F0S3	6-5-3-0-0	-4	0	1	0	0	0	1	15	b2/b5/b7/b8/b9/b10/b11/b12/b15/b22/	y1/y3/y4/y10/y17/	2861	3671.75	#N/A	5	6533.78	0	1	0
4	18303	SunS_13_OVCAR3_HILIC_IntactGlycopeptide_F4.18303.18303.4.0.dta	4311.84	4	70.31	GLGFNLTELAEAEIHK	N5H6F0S2	6-5-2-0-0	-2	0	4	1	1	1	1	11	b6/b10/	y2/y3/y5/y6/y7/y8/y9/y10/y11/	2569.9	1741.93	3582	4	4311.83	1	1	1
4	18324	SunS_13_OVCAR3_HILIC_IntactGlycopeptide_F4.18324.18324.6.0.dta	6532.75	6	70.43	RPTGEVYDIEIDTLETTCHVLDPTPLANCSVR	N5H6F0S3	6-5-3-0-0	-4	0	1	0	0	0	1	15	b2/b5/b6/b7/b8/b9/b10/b11/b12/b15/b22/	y1/y3/y4/y10/	2861	3671.75	#N/A	3	3266.9	0	1	0
4	18332	SunS_13_OVCAR3_HILIC_IntactGlycopeptide_F4.18332.18332.4.0.dta	6532.78	4	70.47	RPTGEVYDIEIDTLETTCHVLDPTPLANCSVR	N5H6F0S3	6-5-3-0-0	-3	0	1	0	0	0	1	13	b2/b8/b9/b10/b11/b12/b15/b22/	y1/y4/y10/y17/y20/	2861	3671.78	#N/A	4	6532.78	1	1	1
4	18336	SunS_13_OVCAR3_HILIC_IntactGlycopeptide_F4.18336.18336.5.0.dta	6532.78	5	70.48	RPTGEVYDIEIDTLETTCHVLDPTPLANCSVR	N5H6F0S3	6-5-3-0-0	-3	0	2	0	1	0	1	22	b2/b5/b6/b7/b8/b9/b10/b11/b12/b13/b14/b15/b17/b18/b22/	y1/y3/y4/y8/y10/y17/y20/	2861	3671.78	#N/A	5	6533.78	0	1	0
4	18344	SunS_13_OVCAR3_HILIC_IntactGlycopeptide_F4.18344.18344.7.0.dta	6532.76	7	70.52	RPTGEVYDIEIDTLETTCHVLDPTPLANCSVR	N5H6F0S3	6-5-3-0-0	-4	0	1	0	0	0	1	12	b2/b5/b6/b7/b8/b9/b10/b11/b12/b15/	y1/y3/	2861	3671.76	13761	7	6536.79	0	1	0
4	18356	SunS_13_OVCAR3_HILIC_IntactGlycopeptide_F4.18356.18356.4.0.dta	4311.81	4	70.57	GLGFNLTELAEAEIHK	N5H6F0S2	6-5-2-0-0	-2	0	4	1	1	1	1	13	b3/b6/	y2/y3/y4/y5/y6/y7/y8/y9/y10/y11/y14/	2569.9	1741.9	#N/A	2	2156.42	0	1	0
4	18387	SunS_13_OVCAR3_HILIC_IntactGlycopeptide_F4.18387.18387.5.0.dta	6532.78	5	70.74	RPTGEVYDIEIDTLETTCHVLDPTPLANCSVR	N5H6F0S3	6-5-3-0-0	-3	0	1	0	0	0	1	10	b2/b5/b8/b9/b10/b11/b12/b22/	y1/y3/	2861	3671.78	#N/A	5	6533.79	0	1	0
4	18402	SunS_13_OVCAR3_HILIC_IntactGlycopeptide_F4.18402.18402.4.0.dta	4311.82	4	70.82	GLGFNLTELAEAEIHK	N5H6F0S2	6-5-2-0-0	-2	0	4	1	1	1	1	10	b6/	y2/y3/y5/y6/y7/y8/y9/y10/y11/	2569.9	1741.91	4053	4	4311.83	1	1	1
4	18449	SunS_13_OVCAR3_HILIC_IntactGlycopeptide_F4.18449.18449.4.0.dta	4311.83	4	71.09	GLGFNLTELAEAEIHK	N5H6F0S2	6-5-2-0-0	-2	0	4	1	1	1	1	11		y2/y3/y4/y5/y6/y7/y8/y9/y10/y11/y14/	2569.9	1741.93	3404	4	4311.82	1	1	1
4	18585	SunS_13_OVCAR3_HILIC_IntactGlycopeptide_F4.18585.18585.4.0.dta	4311.8	4	71.86	GLGFNLTELAEAEIHK	N5H6F0S2	6-5-2-0-0	-2	0	4	1	1	1	1	7		y2/y5/y6/y7/y8/y9/y10/	2569.9	1741.9	#N/A	2	2156.41	0	1	0
4	18635	SunS_13_OVCAR3_HILIC_IntactGlycopeptide_F4.18635.18635.4.0.dta	4311.83	4	72.13	GLGFNLTELAEAEIHK	N5H6F0S2	6-5-2-0-0	-1	0	4	1	1	1	1	8		y2/y4/y5/y6/y7/y8/y9/y10/	2569.9	1741.93	4802	4	4311.83	1	1	1
4	18681	SunS_13_OVCAR3_HILIC_IntactGlycopeptide_F4.18681.18681.4.0.dta	4311.81	4	72.39	GLGFNLTELAEAEIHK	N5H6F0S2	6-5-2-0-0	-1	0	4	1	1	1	1	6		y2/y6/y7/y8/y9/y10/	2569.9	1741.91	#N/A	4	4311.83	1	1	1
4	18727	SunS_13_OVCAR3_HILIC_IntactGlycopeptide_F4.18727.18727.4.0.dta	4311.78	4	72.64	GLGFNLTELAEAEIHK	N5H6F0S2	6-5-2-0-0	-1	0	4	1	1	1	1	7		y2/y3/y5/y6/y7/y9/y10/	2569.9	1741.88	3574	4	4311.81	1	1	1
4	18883	SunS_13_OVCAR3_HILIC_IntactGlycopeptide_F4.18883.18883.4.0.dta	4311.81	4	73.43	GLGFNLTELAEAEIHK	N5H6F0S2	6-5-2-0-0	-2	0	4	1	1	1	1	6		y2/y6/y7/y8/y9/y10/	2569.9	1741.91	#N/A	4	4311.81	1	1	1
4	19140	SunS_13_OVCAR3_HILIC_IntactGlycopeptide_F4.19140.19140.4.0.dta	4733.91	4	74.65	SITFNETYQDISEVVYGAK	N5H6F0S2	6-5-2-0-0	-2	0	3	1	1	1	0	10		y3/y4/y5/y7/y8/y9/y10/y11/y12/y13/	2569.9	2164.01	3485	4	4733.94	1	1	1
4	19168	SunS_13_OVCAR3_HILIC_IntactGlycopeptide_F4.19168.19168.4.0.dta	4219.92	4	74.81	VTNETLTLTFTVLQDIPVR	N4H5F1S1	5-4-1-1-0	-2	0	2	1	0	1	0	15	b4/b6/	y1/y3/y4/y5/y6/y7/y8/y9/y10/y11/y12/y13/y15/	2059.73	2160.19	762	4	4219.93	1	1	1
4	19170	SunS_13_OVCAR3_HILIC_IntactGlycopeptide_F4.19170.19170.4.0.dta	4601.81	4	74.81	LCPDCPLLAPLNDSR	N5H6F0S3	6-5-3-0-0	-2	0	3	1	0	1	1	6	b2/b5/b7/b8/b9/	y2/	2861	1740.81	7771	4	4601.85	1	1	1
4	19216	SunS_13_OVCAR3_HILIC_IntactGlycopeptide_F4.19216.19216.4.0.dta	4601.86	4	75.07	LCPDCPLLAPLNDSR	N5H6F0S3	6-5-3-0-0	-2	0	2	0	0	1	1	6	b2/b5/b8/b9/	y2/y6/	2861	1740.86	6777	4	4601.85	1	1	1
4	19258	SunS_13_OVCAR3_HILIC_IntactGlycopeptide_F4.19258.19258.4.0.dta	4733.94	4	75.29	SITFNETYQDISEVVYGAK	N5H6F0S2	6-5-2-0-0	-2	0	2	1	0	1	0	11	b6/	y1/y3/y4/y5/y6/y8/y10/y11/y12/y13/	2569.9	2164.03	3248	4	4733.93	1	1	1
4	19310	SunS_13_OVCAR3_HILIC_IntactGlycopeptide_F4.19310.19310.4.0.dta	4733.93	4	75.54	SITFNETYQDISEVVYGAK	N5H6F0S2	6-5-2-0-0	-2	0	4	1	1	1	1	19	b2/b3/b6/b9/	y1/y2/y3/y4/y5/y6/y7/y8/y9/y10/y11/y12/y13/y14/y15/	2569.9	2164.02	1765	4	4733.94	1	1	1
4	19311	SunS_13_OVCAR3_HILIC_IntactGlycopeptide_F4.19311.19311.4.0.dta	3976.53	4	75.55	DADACNATNWIEYMFNK	N4H5F0S1	5-4-1-0-0	0	0	2	1	0	1	0	14	b2/b3/b4/b7/b10/	y2/y3/y4/y5/y6/y7/y8/y9/y10/	1913.68	2062.86	6677	4	3976.53	1	0	0
4	19383	SunS_13_OVCAR3_HILIC_IntactGlycopeptide_F4.19383.19383.4.0.dta	5379.23	4	75.92	AQQLLANSTALEEAMLQEQQR	N5H6F1S3	6-5-3-1-0	-4	0	1	0	0	1	0	12	b3/b4/	y1/y2/y4/y5/y6/y7/y8/y10/y11/y14/	3007.06	2372.17	#N/A	2	2690.11	0	1	0
4	19410	SunS_13_OVCAR3_HILIC_IntactGlycopeptide_F4.19410.19410.4.0.dta	4733.94	4	76.06	SITFNETYQDISEVVYGAK	N5H6F0S2	6-5-2-0-0	-2	0	2	1	0	1	0	16	b2/b3/b9/	y1/y2/y3/y4/y5/y6/y7/y8/y9/y10/y11/y12/y13/	2569.9	2164.04	3676	4	4733.95	1	1	1
4	19462	SunS_13_OVCAR3_HILIC_IntactGlycopeptide_F4.19462.19462.4.0.dta	4733.96	4	76.32	SITFNETYQDISEVVYGAK	N5H6F0S2	6-5-2-0-0	0	0	2	1	0	1	0	12	b3/b6/	y3/y4/y5/y6/y8/y9/y10/y11/y12/y13/	2569.9	2164.06	2567	4	4733.97	1	1	1
4	19471	SunS_13_OVCAR3_HILIC_IntactGlycopeptide_F4.19471.19471.4.0.dta	4601.88	4	76.37	LCPDCPLLAPLNDSR	N5H6F0S3	6-5-3-0-0	0	0	4	1	1	1	1	6	b2/b5/b8/b9/	y2/y3/	2861	1740.88	8894	4	4601.86	1	1	1
4	19520	SunS_13_OVCAR3_HILIC_IntactGlycopeptide_F4.19520.19520.4.0.dta	4601.83	4	76.63	LCPDCPLLAPLNDSR	N5H6F0S3	6-5-3-0-0	-2	0	4	1	1	1	1	11	b2/b5/b7/b8/b9/	y1/y2/y3/y6/y7/y13/	2861	1740.83	#N/A	4	4601.85	1	1	1
4	19656	SunS_13_OVCAR3_HILIC_IntactGlycopeptide_F4.19656.19656.5.0.dta	4602.91	5	77.29	GLGFNLTELAEAEIHK	N5H6F0S3	6-5-3-0-0	-2	0	4	1	1	1	1	13	b6/b8/b9/b15/	y2/y3/y5/y6/y7/y8/y9/y10/y11/	2861	1741.91	4077	5	4602.91	1	1	1
4	19681	SunS_13_OVCAR3_HILIC_IntactGlycopeptide_F4.19681.19681.4.0.dta	4602.9	4	77.41	GLGFNLTELAEAEIHK	N5H6F0S3	6-5-3-0-0	-2	0	4	1	1	1	1	26	b2/b3/b4/b5/b6/b7/b8/b9/b10/b11/b12/b13/b14/	y1/y2/y3/y4/y5/y6/y7/y8/y9/y10/y11/y12/y14/	2861	1741.9	4424	4	4602.91	1	1	1
4	19691	SunS_13_OVCAR3_HILIC_IntactGlycopeptide_F4.19691.19691.3.0.dta	4602.9	3	77.45	GLGFNLTELAEAEIHK	N5H6F0S3	6-5-3-0-0	-2	0	4	1	1	1	1	16	b3/b4/b6/b10/b14/	y2/y3/y4/y5/y6/y7/y8/y9/y10/y11/y12/	2861	1741.9	2543	3	4602.91	1	1	1
4	19779	SunS_13_OVCAR3_HILIC_IntactGlycopeptide_F4.19779.19779.4.0.dta	4601.87	4	77.92	LCPDCPLLAPLNDSR	N5H6F0S3	6-5-3-0-0	-3	0	3	1	0	1	1	10	b3/b5/b7/b8/b9/	y1/y2/y3/y6/y11/	2861	1740.87	#N/A	4	4601.85	1	1	1
4	19825	SunS_13_OVCAR3_HILIC_IntactGlycopeptide_F4.19825.19825.4.0.dta	4601.82	4	78.17	LCPDCPLLAPLNDSR	N5H6F0S3	6-5-3-0-0	0	0	3	1	0	1	1	8	b5/b6/b7/b8/b9/	y2/y3/y6/	2861	1740.82	#N/A	4	4601.85	1	1	1
4	20537	SunS_13_OVCAR3_HILIC_IntactGlycopeptide_F4.20537.20537.5.0.dta	5877.57	5	82.32	VVHAVEVALATFNAESNGSYLQLVEISR	N5H6F0S3	6-5-3-0-0	-2	0	1	0	0	0	1	15	b3/b4/b5/b6/b7/b8/b9/b10/b11/	y2/y3/y4/y5/y6/y11/	2861	3016.57	2580	5	5877.58	1	1	1
4	20705	SunS_13_OVCAR3_HILIC_IntactGlycopeptide_F4.20705.20705.5.0.dta	5877.59	5	83.33	VVHAVEVALATFNAESNGSYLQLVEISR	N5H6F0S3	6-5-3-0-0	-2	0	2	0	1	0	1	14	b4/b5/b6/b7/b8/b9/b10/b11/	y2/y3/y4/y5/y6/y8/	2861	3016.59	3483	5	5877.56	1	1	1
4	20804	SunS_13_OVCAR3_HILIC_IntactGlycopeptide_F4.20804.20804.5.0.dta	5877.56	5	83.91	VVHAVEVALATFNAESNGSYLQLVEISR	N5H6F0S3	6-5-3-0-0	-3	0	1	0	0	0	1	17	b3/b4/b6/b7/b8/b9/b10/b15/	y2/y3/y4/y5/y6/y7/y8/y9/y11/	2861	3016.56	2451	5	5878.59	0	1	0
4	20805	SunS_13_OVCAR3_HILIC_IntactGlycopeptide_F4.20805.20805.4.0.dta	5877.55	4	83.92	VVHAVEVALATFNAESNGSYLQLVEISR	N5H6F0S3	6-5-3-0-0	-3	0	1	0	1	0	0	12	b3/b4/b5/b6/b7/b8/b9/	y2/y3/y4/y6/y7/	2861	3016.55	#N/A	2	2939.79	0	1	0
4	20849	SunS_13_OVCAR3_HILIC_IntactGlycopeptide_F4.20849.20849.5.0.dta	5877.6	5	84.18	VVHAVEVALATFNAESNGSYLQLVEISR	N5H6F0S3	6-5-3-0-0	-3	0	2	0	1	0	1	21	b3/b4/b5/b6/b7/b8/b9/b10/b11/b14/b15/	y1/y2/y3/y4/y5/y6/y7/y8/y9/y11/	2861	3016.6	1612	5	5877.58	1	1	1
4	20850	SunS_13_OVCAR3_HILIC_IntactGlycopeptide_F4.20850.20850.4.0.dta	5877.56	4	84.18	VVHAVEVALATFNAESNGSYLQLVEISR	N5H6F0S3	6-5-3-0-0	-2	0	1	0	0	0	1	17	b3/b4/b5/b6/b7/b8/b9/b10/b15/	y1/y2/y4/y5/y6/y7/y8/y11/	2861	3016.56	1256	4	5877.59	1	1	1
5	4793	SunS_13_OVCAR3_HILIC_IntactGlycopeptide_F5.4793.4793.3.0.dta	3033.15	3	27.29	YHYNGTFEDGK	N2H8F0S0	8-2-0-0-0	0	0	4	1	1	1	1	7	b1/b2/b3/b9/	y2/y3/y8/	1702.58	1330.57	#N/A	3	3033.15	1	0	0
5	4835	SunS_13_OVCAR3_HILIC_IntactGlycopeptide_F5.4835.4835.3.0.dta	2871.1	3	27.47	YHYNGTFEDGK	N2H7F0S0	7-2-0-0-0	0	0	4	1	1	1	1	9	b1/b2/b3/b8/	y2/y3/y7/y8/y9/	1540.53	1330.57	#N/A	3	2871.1	1	0	0
5	4854	SunS_13_OVCAR3_HILIC_IntactGlycopeptide_F5.4854.4854.3.0.dta	2709.05	3	27.53	YHYNGTFEDGK	N2H6F0S0	6-2-0-0-0	0	0	4	1	1	1	1	15	b1/b2/b3/b6/b7/b8/b9/	y1/y2/y3/y4/y5/y7/y8/y9/	1378.48	1330.57	#N/A	3	2709.04	1	0	0
5	4880	SunS_13_OVCAR3_HILIC_IntactGlycopeptide_F5.4880.4880.3.0.dta	3658.51	3	27.61	DLGPTLANSTHHNVR	N2H10F0S0	10-2-0-0-0	-1	0	4	1	1	1	1	9	b5/b6/	y1/y2/y3/y4/y5/y6/y7/	2026.69	1631.83	2965	3	3658.51	1	1	1
5	4900	SunS_13_OVCAR3_HILIC_IntactGlycopeptide_F5.4900.4900.4.0.dta	3496.45	4	27.67	DLGPTLANSTHHNVR	N2H9F0S0	9-2-0-0-0	0	0	4	1	1	1	1	11	b2/b6/b7/	y1/y2/y3/y4/y5/y6/y7/y9/	1864.63	1631.81	2411	4	3496.46	1	1	1
5	4925	SunS_13_OVCAR3_HILIC_IntactGlycopeptide_F5.4925.4925.4.0.dta	3334.41	4	27.74	DLGPTLANSTHHNVR	N2H8F0S0	8-2-0-0-0	-2	0	4	1	1	1	1	11	b2/b5/b6/b7/	y1/y2/y3/y4/y5/y6/y7/	1702.58	1631.83	4007	4	3334.41	1	1	1
5	4929	SunS_13_OVCAR3_HILIC_IntactGlycopeptide_F5.4929.4929.3.0.dta	3334.42	3	27.75	DLGPTLANSTHHNVR	N2H8F0S0	8-2-0-0-0	-1	0	4	1	1	1	1	8	b2/	y1/y2/y3/y4/y5/y6/y7/	1702.58	1631.84	2537	3	3334.41	1	1	1
5	4966	SunS_13_OVCAR3_HILIC_IntactGlycopeptide_F5.4966.4966.3.0.dta	3172.35	3	27.86	DLGPTLANSTHHNVR	N2H7F0S0	7-2-0-0-0	0	0	4	1	1	1	1	10	b2/b5/	y1/y2/y3/y4/y5/y7/y9/y13/	1540.53	1631.83	978	3	3172.35	1	1	1
5	5004	SunS_13_OVCAR3_HILIC_IntactGlycopeptide_F5.5004.5004.3.0.dta	3010.31	3	27.96	DLGPTLANSTHHNVR	N2H6F0S0	6-2-0-0-0	-1	0	4	1	1	1	1	11	b2/b5/b6/b7/	y1/y2/y3/y4/y5/y6/y7/	1378.48	1631.83	901	3	3010.3	1	1	1
5	5006	SunS_13_OVCAR3_HILIC_IntactGlycopeptide_F5.5006.5006.4.0.dta	3010.29	4	27.97	DLGPTLANSTHHNVR	N2H6F0S0	6-2-0-0-0	0	0	4	1	1	1	1	12	b2/b3/b6/b7/	y1/y2/y3/y4/y5/y6/y7/y9/	1378.48	1631.82	579	4	3010.29	1	1	1
5	5062	SunS_13_OVCAR3_HILIC_IntactGlycopeptide_F5.5062.5062.4.0.dta	3655.6	4	28.11	YPHKPEINSTTHPGADLR	N4H5F0S0	5-4-0-0-0	-2	0	2	0	1	0	1	14	b2/b3/b4/b7/b8/	y1/y2/y3/y6/y7/y8/y9/y10/y14/	1622.58	2033.02	4962	4	3655.6	1	1	1
5	5080	SunS_13_OVCAR3_HILIC_IntactGlycopeptide_F5.5080.5080.5.0.dta	3655.6	5	28.16	YPHKPEINSTTHPGADLR	N4H5F0S0	5-4-0-0-0	0	0	2	0	1	0	1	8	b3/b4/	y1/y2/y6/y7/y10/y14/	1622.58	2033.02	4894	5	3655.6	1	1	1
5	5111	SunS_13_OVCAR3_HILIC_IntactGlycopeptide_F5.5111.5111.4.0.dta	3452.52	4	28.25	YPHKPEINSTTHPGADLR	N3H5F0S0	5-3-0-0-0	-2	0	2	0	1	0	1	7	b3/b4/	y1/y2/y6/y8/y14/	1419.5	2033.02	4412	4	3452.52	1	1	1
5	5156	SunS_13_OVCAR3_HILIC_IntactGlycopeptide_F5.5156.5156.3.0.dta	3092.3	3	28.36	EERPLNASALK	N2H9F0S0	9-2-0-0-0	-1	0	4	1	1	1	1	11	b3/b5/b6/b7/b9/b10/	y1/y2/y3/y4/y5/	1864.63	1227.66	662	3	3092.31	1	1	1
5	5161	SunS_13_OVCAR3_HILIC_IntactGlycopeptide_F5.5161.5161.3.0.dta	3083.29	3	28.38	VNNTLSSQISR	N2H9F0S0	9-2-0-0-0	-1	0	4	1	1	1	1	10	b2/	y1/y2/y3/y5/y6/y7/y8/y9/y10/	1864.63	1218.66	171	3	3083.28	1	1	1
5	5172	SunS_13_OVCAR3_HILIC_IntactGlycopeptide_F5.5172.5172.3.0.dta	2930.24	3	28.41	EERPLNASALK	N2H8F0S0	8-2-0-0-0	-1	0	4	1	1	1	1	12	b3/b5/b6/b7/b9/b10/	y1/y2/y3/y4/y5/y10/	1702.58	1227.66	912	3	2930.25	1	1	1
5	5192	SunS_13_OVCAR3_HILIC_IntactGlycopeptide_F5.5192.5192.3.0.dta	2921.22	3	28.46	VNNTLSSQISR	N2H8F0S0	8-2-0-0-0	0	0	4	1	1	1	1	14	b2/b3/b4/b5/	y1/y2/y3/y4/y5/y6/y7/y8/y9/y10/	1702.58	1218.64	52	3	2921.23	1	1	1
5	5233	SunS_13_OVCAR3_HILIC_IntactGlycopeptide_F5.5233.5233.3.0.dta	2759.16	3	28.58	VNNTLSSQISR	N2H7F0S0	7-2-0-0-0	-1	0	4	1	1	1	1	9	b2/	y1/y2/y3/y5/y6/y7/y8/y9/	1540.53	1218.64	78	3	2759.17	1	1	1
5	5282	SunS_13_OVCAR3_HILIC_IntactGlycopeptide_F5.5282.5282.3.0.dta	2597.11	3	28.72	VNNTLSSQISR	N2H6F0S0	6-2-0-0-0	0	0	4	1	1	1	1	14	b2/b3/b4/b5/	y1/y2/y3/y4/y5/y6/y7/y8/y9/y10/	1378.48	1218.64	30	3	2597.12	1	1	1
5	5284	SunS_13_OVCAR3_HILIC_IntactGlycopeptide_F5.5284.5284.3.0.dta	3345.39	3	28.73	HLLENSTASVSEAER	N2H8F0S0	8-2-0-0-0	-1	0	4	1	1	1	1	8	b2/b4/	y1/y5/y7/y8/y10/y13/	1702.58	1642.81	1069	3	3345.38	1	1	1
5	5309	SunS_13_OVCAR3_HILIC_IntactGlycopeptide_F5.5309.5309.3.0.dta	3183.33	3	28.79	HLLENSTASVSEAER	N2H7F0S0	7-2-0-0-0	-1	0	4	1	1	1	1	13	b2/b3/b4/b12/	y1/y3/y5/y7/y8/y9/y10/y12/y13/	1540.53	1642.8	832	3	3183.33	1	1	1
5	5358	SunS_13_OVCAR3_HILIC_IntactGlycopeptide_F5.5358.5358.3.0.dta	3021.28	3	28.92	HLLENSTASVSEAER	N2H6F0S0	6-2-0-0-0	-1	0	3	0	1	1	1	10	b2/b3/b4/	y1/y5/y7/y8/y9/y10/y13/	1378.48	1642.8	780	3	3021.28	1	1	1
5	5600	SunS_13_OVCAR3_HILIC_IntactGlycopeptide_F5.5600.5600.4.0.dta	3408.42	4	29.78	KWGHNITEFQQR	N2H9F0S0	9-2-0-0-0	0	0	4	1	1	1	1	7	b1/b4/	y1/y4/y5/y6/y7/	1864.63	1543.78	3034	4	3408.41	1	1	1
5	5601	SunS_13_OVCAR3_HILIC_IntactGlycopeptide_F5.5601.5601.3.0.dta	3408.41	3	29.78	KWGHNITEFQQR	N2H9F0S0	9-2-0-0-0	-2	0	4	1	1	1	1	12	b1/b2/b4/b8/	y1/y2/y4/y5/y6/y7/y10/y11/	1864.63	1543.78	4570	3	3408.41	1	1	1
5	5624	SunS_13_OVCAR3_HILIC_IntactGlycopeptide_F5.5624.5624.3.0.dta	2651.16	3	29.86	ALSPNSTISSAPK	N2H6F0S0	6-2-0-0-0	0	0	4	1	1	1	1	13	b2/b3/b11/	y1/y2/y3/y4/y5/y6/y7/y8/y10/y11/	1378.48	1272.68	1950	3	2651.16	1	1	1
5	5721	SunS_13_OVCAR3_HILIC_IntactGlycopeptide_F5.5721.5721.3.0.dta	3151.29	3	30.14	RNESHLIDFR	N2H9F0S0	9-2-0-0-0	-1	0	4	1	1	1	1	10	b6/b8/	y1/y2/y3/y4/y5/y6/y7/y8/	1864.63	1286.66	#N/A	3	3151.3	1	1	1
5	5722	SunS_13_OVCAR3_HILIC_IntactGlycopeptide_F5.5722.5722.4.0.dta	3151.3	4	30.14	RNESHLIDFR	N2H9F0S0	9-2-0-0-0	-1	0	3	0	1	1	1	12	b1/b3/b6/b8/	y1/y2/y3/y4/y5/y6/y7/y8/	1864.63	1286.66	#N/A	4	3151.3	1	1	1
5	5747	SunS_13_OVCAR3_HILIC_IntactGlycopeptide_F5.5747.5747.3.0.dta	2989.23	3	30.23	RNESHLIDFR	N2H8F0S0	8-2-0-0-0	0	0	4	1	1	1	1	8	b1/b6/	y1/y2/y3/y4/y5/y7/	1702.58	1286.65	#N/A	3	2989.24	1	1	1
5	5762	SunS_13_OVCAR3_HILIC_IntactGlycopeptide_F5.5762.5762.4.0.dta	2989.23	4	30.27	RNESHLIDFR	N2H8F0S0	8-2-0-0-0	-1	0	3	0	1	1	1	10	b1/b6/b8/	y1/y2/y3/y4/y5/y6/y7/	1702.58	1286.65	2137	4	2989.24	1	1	1
5	5815	SunS_13_OVCAR3_HILIC_IntactGlycopeptide_F5.5815.5815.4.0.dta	3968.54	4	30.43	VWQGHANASFCPHGYGCR	N2H9F0S0	9-2-0-0-0	0	0	2	0	1	0	1	10	b2/b5/b6/b8/	y3/y5/y7/y8/y10/y11/	1864.63	2103.91	#N/A	4	3968.54	1	0	0
5	5857	SunS_13_OVCAR3_HILIC_IntactGlycopeptide_F5.5857.5857.3.0.dta	3246.36	3	30.58	DNATLQATLHAAR	N2H9F0S0	9-2-0-0-0	-1	0	4	1	1	1	1	16	b2/b3/b4/b5/b7/	y1/y2/y3/y4/y5/y6/y7/y8/y9/y10/y11/	1864.63	1381.73	102	3	3246.35	1	1	1
5	5873	SunS_13_OVCAR3_HILIC_IntactGlycopeptide_F5.5873.5873.3.0.dta	3084.3	3	30.63	DNATLQATLHAAR	N2H8F0S0	8-2-0-0-0	-1	0	4	1	1	1	1	16	b2/b3/b4/b5/	y1/y2/y3/y4/y5/y6/y7/y8/y9/y10/y11/y12/	1702.58	1381.72	109	3	3084.3	1	1	1
5	5908	SunS_13_OVCAR3_HILIC_IntactGlycopeptide_F5.5908.5908.3.0.dta	2922.24	3	30.74	DNATLQATLHAAR	N2H7F0S0	7-2-0-0-0	-1	0	4	1	1	1	1	14	b2/b3/b4/	y1/y2/y3/y4/y5/y6/y7/y8/y9/y10/y11/	1540.53	1381.71	106	3	2922.25	1	1	1
5	5912	SunS_13_OVCAR3_HILIC_IntactGlycopeptide_F5.5912.5912.3.0.dta	3337.3	3	30.74	NTSVGPLYSGCR	N2H10F0S0	10-2-0-0-0	-1	0	4	1	1	1	1	10	b2/	y1/y3/y4/y5/y7/y8/y9/y10/y11/	2026.69	1310.61	498	3	3337.31	1	1	1
5	5918	SunS_13_OVCAR3_HILIC_IntactGlycopeptide_F5.5918.5918.3.0.dta	3195.24	3	30.77	NTSVSSLYSGCR	N2H9F0S0	9-2-0-0-0	-1	0	3	1	1	1	0	11	b2/	y1/y3/y4/y5/y6/y7/y8/y9/y10/y11/	1864.63	1330.6	388	3	3195.24	1	1	1
5	5933	SunS_13_OVCAR3_HILIC_IntactGlycopeptide_F5.5933.5933.3.0.dta	3175.24	3	30.82	NTSVGPLYSGCR	N2H9F0S0	9-2-0-0-0	0	0	4	1	1	1	1	10	b2/	y1/y3/y4/y5/y7/y8/y9/y10/y11/	1864.63	1310.61	279	3	3175.25	1	1	1
5	5943	SunS_13_OVCAR3_HILIC_IntactGlycopeptide_F5.5943.5943.3.0.dta	2667.12	3	30.86	SNLTVLR	N2H9F0S0	9-2-0-0-0	-1	0	4	1	1	1	1	6	b2/	y1/y2/y3/y4/y5/	1864.63	802.483	1169	3	2667.11	1	1	1
5	5952	SunS_13_OVCAR3_HILIC_IntactGlycopeptide_F5.5952.5952.3.0.dta	3033.18	3	30.88	NTSVSSLYSGCR	N2H8F0S0	8-2-0-0-0	0	0	2	1	0	1	0	11	b2/	y1/y3/y4/y5/y6/y7/y8/y9/y10/y11/	1702.58	1330.6	1958	3	3033.19	1	1	1
5	5957	SunS_13_OVCAR3_HILIC_IntactGlycopeptide_F5.5957.5957.4.0.dta	3647.45	4	30.9	NTSVGPLYSGCR	N6H6F1S0	6-6-0-1-0	-1	0	2	1	0	1	0	7		y3/y4/y5/y7/y8/y9/y10/	2336.85	1310.6	3166	4	3647.47	1	1	1
5	5967	SunS_13_OVCAR3_HILIC_IntactGlycopeptide_F5.5967.5967.3.0.dta	3447.39	3	30.93	NTSVSSLYSGCR	N5H5F0S1	5-5-1-0-0	-2	0	2	1	0	1	0	8		y1/y4/y5/y6/y7/y8/y9/y10/	2116.76	1330.63	2922	3	3448.39	0	1	0
5	5971	SunS_13_OVCAR3_HILIC_IntactGlycopeptide_F5.5971.5971.4.0.dta	3447.39	4	30.94	NTSVSSLYSGCR	N5H5F0S1	5-5-1-0-0	-2	0	3	1	1	1	0	10	b2/	y1/y3/y4/y5/y6/y7/y8/y9/y10/	2116.76	1330.63	654	4	3448.39	0	1	0
5	5985	SunS_13_OVCAR3_HILIC_IntactGlycopeptide_F5.5985.5985.3.0.dta	2760.19	3	30.98	DNATLQATLHAAR	N2H6F0S0	6-2-0-0-0	0	0	4	1	1	1	1	18	b2/b3/b4/b5/b6/b9/	y1/y2/y3/y4/y5/y6/y7/y8/y9/y10/y11/y12/	1378.48	1381.71	76	3	2760.2	1	1	1
5	5989	SunS_13_OVCAR3_HILIC_IntactGlycopeptide_F5.5989.5989.3.0.dta	3485.42	3	30.99	NTSVGPLYSGCR	N6H5F1S0	5-6-0-1-0	-1	0	2	1	0	1	0	6		y3/y4/y5/y7/y8/y10/	2174.8	1310.62	2575	3	3485.42	1	1	1
5	5990	SunS_13_OVCAR3_HILIC_IntactGlycopeptide_F5.5990.5990.3.0.dta	3286.32	3	30.99	NTSVSSLYSGCR	N5H4F2S0	4-5-0-2-0	-1	0	2	1	0	1	0	6		y1/y4/y5/y7/y8/y10/	1955.72	1330.6	3147	3	3286.33	1	1	1
5	6001	SunS_13_OVCAR3_HILIC_IntactGlycopeptide_F5.6001.6001.3.0.dta	3013.21	3	31.02	NTSVGPLYSGCR	N2H8F0S0	8-2-0-0-0	0	0	4	1	1	1	1	17	b2/b3/b4/b5/b7/b8/b9/	y1/y3/y4/y5/y6/y7/y8/y9/y10/y11/	1702.58	1310.63	236	3	3013.2	1	1	1
5	6002	SunS_13_OVCAR3_HILIC_IntactGlycopeptide_F5.6002.6002.4.0.dta	3485.41	4	31.03	NTSVGPLYSGCR	N6H5F1S0	5-6-0-1-0	-1	0	3	1	1	1	0	10	b2/	y1/y3/y4/y5/y7/y8/y9/y10/y11/	2174.8	1310.61	#N/A	2	1743.71	0	1	0
5	6008	SunS_13_OVCAR3_HILIC_IntactGlycopeptide_F5.6008.6008.3.0.dta	3027.15	3	31.04	NCTQSLQCWK	N2H8F0S0	8-2-0-0-0	-1	0	4	1	1	1	1	14	b2/b3/b4/b6/b7/	y1/y2/y3/y4/y5/y6/y7/y8/y9/	1702.58	1324.57	#N/A	3	3027.16	1	0	0
5	6013	SunS_13_OVCAR3_HILIC_IntactGlycopeptide_F5.6013.6013.3.0.dta	3225.32	3	31.06	NTSVGPLYSGCR	N4H5F2S0	5-4-0-2-0	-1	0	2	1	0	1	0	9		y1/y3/y4/y5/y7/y8/y9/y10/y11/	1914.7	1310.62	1746	3	3225.31	1	1	1
5	6027	SunS_13_OVCAR3_HILIC_IntactGlycopeptide_F5.6027.6027.4.0.dta	3428.39	4	31.09	NTSVGPLYSGCR	N5H5F2S0	5-5-0-2-0	0	0	3	1	1	1	0	11	b2/	y1/y3/y4/y5/y6/y7/y8/y9/y10/y11/	2117.78	1310.62	1678	4	3428.39	1	1	1
5	6044	SunS_13_OVCAR3_HILIC_IntactGlycopeptide_F5.6044.6044.3.0.dta	3428.4	3	31.14	NTSVGPLYSGCR	N5H5F2S0	5-5-0-2-0	0	0	2	1	0	1	0	10	b2/	y1/y3/y4/y5/y7/y8/y9/y10/y11/	2117.78	1310.62	1668	3	3428.39	1	1	1
5	6050	SunS_13_OVCAR3_HILIC_IntactGlycopeptide_F5.6050.6050.3.0.dta	3266.33	3	31.16	NTSVGPLYSGCR	N5H4F2S0	4-5-0-2-0	-2	0	2	1	0	1	0	10	b2/	y1/y3/y4/y5/y7/y8/y9/y10/y11/	1955.72	1310.61	3016	3	3266.34	1	1	1
5	6052	SunS_13_OVCAR3_HILIC_IntactGlycopeptide_F5.6052.6052.4.0.dta	3266.34	4	31.16	NTSVGPLYSGCR	N5H4F2S0	4-5-0-2-0	-2	0	3	1	1	1	0	8	b2/	y1/y4/y5/y7/y8/y9/y10/	1955.72	1310.62	2569	4	3266.34	1	1	1
5	6068	SunS_13_OVCAR3_HILIC_IntactGlycopeptide_F5.6068.6068.3.0.dta	2865.11	3	31.21	NCTQSLQCWK	N2H7F0S0	7-2-0-0-0	-1	0	4	1	1	1	1	12	b2/b3/b7/	y1/y2/y3/y4/y5/y6/y7/y8/y9/	1540.53	1324.58	#N/A	3	2865.11	1	0	0
5	6107	SunS_13_OVCAR3_HILIC_IntactGlycopeptide_F5.6107.6107.3.0.dta	3569.44	3	31.32	EEAMLYHNQTAELR	N2H9F0S0	9-2-0-0-0	-1	0	4	1	1	1	1	11	b3/b4/b5/b7/	y1/y2/y3/y4/y5/y6/y8/	1864.63	1704.8	#N/A	3	3569.44	1	0	0
5	6125	SunS_13_OVCAR3_HILIC_IntactGlycopeptide_F5.6125.6125.4.0.dta	3428.4	4	31.37	NTSVGPLYSGCR	N5H5F2S0	5-5-0-2-0	0	0	2	1	0	1	0	9	b2/	y1/y3/y4/y5/y7/y8/y9/y10/	2117.78	1310.63	1460	4	3428.39	1	1	1
5	6126	SunS_13_OVCAR3_HILIC_IntactGlycopeptide_F5.6126.6126.3.0.dta	3407.38	3	31.37	EEAMLYHNQTAELR	N2H8F0S0	8-2-0-0-0	-1	0	4	1	1	1	1	15	b2/b3/b4/b5/b6/b7/b9/	y1/y2/y3/y4/y5/y6/y8/y10/	1702.58	1704.8	#N/A	3	3407.38	1	0	0
5	6160	SunS_13_OVCAR3_HILIC_IntactGlycopeptide_F5.6160.6160.3.0.dta	3282.33	3	31.48	NTSVGPLYSGCR	N5H5F1S0	5-5-0-1-0	-1	0	3	1	1	1	0	10	b2/	y1/y3/y4/y5/y7/y8/y9/y10/y11/	1971.72	1310.61	3086	3	3282.34	1	1	1
5	6193	SunS_13_OVCAR3_HILIC_IntactGlycopeptide_F5.6193.6193.3.0.dta	3083.28	3	31.58	EEAMLYHNQTAELR	N2H6F0S0	6-2-0-0-0	-2	0	4	1	1	1	1	8	b3/b4/b5/	y1/y2/y3/y4/y5/	1378.48	1704.8	8006	3	3083.28	1	0	0
5	6198	SunS_13_OVCAR3_HILIC_IntactGlycopeptide_F5.6198.6198.4.0.dta	3739.54	4	31.6	LANNTHQHVFDDLR	N4H5F1S1	5-4-1-1-0	-1	0	3	0	1	1	1	6		y1/y2/y3/y5/y7/y8/	2059.73	1679.81	3370	4	3739.56	1	1	1
5	6404	SunS_13_OVCAR3_HILIC_IntactGlycopeptide_F5.6404.6404.3.0.dta	2794.15	3	32.39	WGHNITEFQQR	N2H6F0S0	6-2-0-0-0	0	0	4	1	1	1	1	10	b3/b5/b6/	y1/y3/y4/y5/y6/y7/y8/	1378.48	1415.68	802	3	2794.16	1	1	1
5	6424	SunS_13_OVCAR3_HILIC_IntactGlycopeptide_F5.6424.6424.3.0.dta	2679.14	3	32.47	LNGTDPIVAADSK	N2H6F0S0	6-2-0-0-0	0	0	4	1	1	1	1	15	b2/b3/b5/b8/b11/b12/	y2/y3/y4/y5/y6/y8/y9/y11/y12/	1378.48	1300.67	98	3	2679.15	1	1	1
5	6485	SunS_13_OVCAR3_HILIC_IntactGlycopeptide_F5.6485.6485.3.0.dta	3029.22	3	32.71	FNLSHLGSK	N2H10F0S0	10-2-0-0-0	-1	0	4	1	1	1	1	10	b2/b5/b6/b7/	y1/y3/y4/y5/y6/y7/	2026.69	1002.54	#N/A	3	3029.22	1	0	0
5	6506	SunS_13_OVCAR3_HILIC_IntactGlycopeptide_F5.6506.6506.3.0.dta	2867.17	3	32.78	FNLSHLGSK	N2H9F0S0	9-2-0-0-0	-1	0	4	1	1	1	1	11	b2/b3/b5/b6/b8/	y1/y3/y4/y5/y6/y7/	1864.63	1002.53	#N/A	3	2867.16	1	0	0
5	6522	SunS_13_OVCAR3_HILIC_IntactGlycopeptide_F5.6522.6522.4.0.dta	3433.4	4	32.84	GLNLTEDTYKPR	N2H10F0S0	10-2-0-0-0	0	0	4	1	1	1	1	13	b2/b3/b4/	y1/y2/y3/y4/y5/y6/y7/y8/y9/y10/	2026.69	1406.72	184	4	3433.41	1	1	1
5	6523	SunS_13_OVCAR3_HILIC_IntactGlycopeptide_F5.6523.6523.3.0.dta	2705.11	3	32.84	FNLSHLGSK	N2H8F0S0	8-2-0-0-0	-1	0	4	1	1	1	1	9	b5/b6/	y1/y2/y3/y4/y5/y6/y7/	1702.58	1002.53	#N/A	3	2705.11	1	0	0
5	6532	SunS_13_OVCAR3_HILIC_IntactGlycopeptide_F5.6532.6532.3.0.dta	2785.19	3	32.88	GLNLTEDTYKPR	N2H6F0S0	6-2-0-0-0	-1	0	4	1	1	1	1	6		y1/y2/y5/y7/y8/y9/	1378.48	1406.72	3725	3	2785.2	1	1	1
5	6539	SunS_13_OVCAR3_HILIC_IntactGlycopeptide_F5.6539.6539.4.0.dta	3271.36	4	32.9	GLNLTEDTYKPR	N2H9F0S0	9-2-0-0-0	-1	0	4	1	1	1	1	13	b2/b3/b4/b7/	y1/y2/y3/y4/y5/y6/y7/y8/y9/	1864.63	1406.72	75	4	3271.36	1	1	1
5	6542	SunS_13_OVCAR3_HILIC_IntactGlycopeptide_F5.6542.6542.3.0.dta	2947.25	3	32.92	GLNLTEDTYKPR	N2H7F0S0	7-2-0-0-0	-1	0	4	1	1	1	1	7	b3/	y2/y5/y6/y7/y8/y9/	1540.53	1406.73	316	3	2947.25	1	1	1
5	6543	SunS_13_OVCAR3_HILIC_IntactGlycopeptide_F5.6543.6543.3.0.dta	2623.17	3	32.92	GLNLTEDTYKPR	N2H5F0S0	5-2-0-0-0	-1	0	4	1	1	1	1	7	b3/	y1/y2/y3/y5/y8/y9/	1216.42	1406.74	3440	3	2623.15	1	1	1
[truncated: 2,798 more rows]

## Sheet: pMatchGlyco
QuerySpecName	QueryPrecursorMH	LibPrecursorMH	Charge	Sequence	Modification	GlycanMass	GlycanName	GlycoLoc	MatchedYIonNum	MatchedYIonIntSum	MatchedPepIonNum	MatchedPepIonIntSum	DPS	PS	pMatchGlyco_Score	DPSIon	PSIon	Peptide is identical	Glycan is identical	Type	Ovarlap
[truncated: 7,494 more rows]

[truncated: 1 more sheets: 247 GPSMs]
